# Supplementary material
Source: HighWire-hosted journal article supplement (doi:10.1101/rna.080311.124)
Supplement: Supplemental_File_S1.xlsx [file Supplemental_File_S1.xlsx]

## Sheet: antiFLAG_CG44249RIP_vs_mockRIP
Gene Identifiers	mean normalised counts, averaged over all samples from both conditions	the logarithm (to basis 2) of the fold change	standard error estimate for the log2 fold change estimate	Wald statistic	p value for the statistical significance of this change	p value adjusted for multiple testing with the Benjamini-Hochberg procedure which controls false discovery rate (FDR)			Gene Identifiers	mean normalised counts, averaged over all samples from both conditions	the logarithm (to basis 2) of the fold change (See the note in inputs section)	standard error estimate for the log2 fold change estimate	Wald statistic	p value for the statistical significance of this change	p value adjusted for multiple testing with the Benjamini-Hochberg procedure which controls false discovery rate (FDR)
snRNA:U11	55918.8	3.97944	0.378398	10.5165	7.24882e-26	8.67353e-24
Vm34Ca	7319.56	2.4839	0.164502	15.0995	1.63243e-51	8.78973e-49
CG17593	2671.68	1.82066	0.0762068	23.891	3.80073e-126	1.84183e-122
snRNA:U12	3589.95	1.81074	0.357087	5.07087	3.95993e-07	4.61848e-06
ana3	5633.21	1.78746	0.102709	17.4032	7.8063e-68	5.81989e-65
Nup188	3390.25	1.68271	0.115185	14.6087	2.47183e-48	1.14081e-45
GlyRS	1864.05	1.61011	0.154533	10.4192	2.02566e-25	2.36539e-23
Vps8	1502.54	1.55806	0.0807221	19.3016	5.20976e-83	6.31162e-80
Npl4	3851.52	1.52788	0.0714888	21.3723	2.42109e-101	7.82175e-98
Plap	1587.49	1.51447	0.118431	12.7877	1.92002e-37	5.02941e-35
PrBP	430.596	1.50404	0.139724	10.7644	5.06875e-27	6.63869e-25
lncRNA:CR45422	5.60211	1.4325	0.401259	3.57001	0.000356964	0.00189261
Nup205	3317.91	1.43061	0.115957	12.3374	5.69522e-35	1.22662e-32
PIG-U	813.38	1.4166	0.11436	12.3872	3.06519e-35	7.07329e-33
Act42A	3670.65	1.41409	0.105245	13.4363	3.70688e-41	1.12272e-38
CG3368	2551.25	1.40793	0.0681739	20.652	9.36691e-95	1.81568e-91
rdog	18693	1.3899	0.0892976	15.5649	1.26135e-54	7.19119e-52
CG3356	4204.52	1.36736	0.0762393	17.9351	6.27038e-72	5.52477e-69
Duox	4336.26	1.34681	0.0947235	14.2183	7.05593e-46	2.84942e-43
Rich	2958.12	1.34457	0.102183	13.1584	1.52291e-39	4.47274e-37
CG12499	5421.03	1.34253	0.0981372	13.6801	1.33509e-42	4.62131e-40
Cyp6v1	2438.56	1.32626	0.0661871	20.038	2.56725e-89	4.14697e-86
CG16953	2557.23	1.3224	0.0811075	16.3042	9.20738e-60	6.37414e-57
Vm26Ab	2219.3	1.32152	0.20617	6.40987	1.45647e-10	3.42174e-09
mon2	2775.92	1.30395	0.0967405	13.4788	2.08478e-41	6.96746e-39
THADA	825.131	1.28901	0.127702	10.094	5.8753e-24	6.1895e-22
CG42672	2806.23	1.28385	0.0954118	13.4559	2.84396e-41	8.8915e-39
RpLP0	14516.1	1.27001	0.0904885	14.035	9.52003e-45	3.54877e-42
CG8230	1649.44	1.26934	0.068143	18.6276	1.91954e-77	2.06713e-74
CG2794	595.824	1.26152	0.110665	11.3995	4.20702e-30	6.91092e-28
l(2)k09022	4896.41	1.2611	0.116383	10.8358	2.32942e-27	3.17982e-25
CG33969	754.911	1.25536	0.102812	12.2102	2.74117e-34	5.77552e-32
CG7009	191.124	1.23735	0.180792	6.84407	7.69742e-12	2.18139e-10
vir	994.046	1.21515	0.145434	8.35535	6.52381e-17	3.71934e-15
His4:CG33869	44.4832	1.20559	0.366664	3.288	0.001009	0.00463033
CG6201	225.94	1.19593	0.163109	7.33209	2.26586e-13	7.92807e-12
PSR	1697.57	1.18911	0.0826128	14.3938	5.65867e-47	2.4929e-44
sesB	16226.7	1.18852	0.143261	8.29616	1.0753e-16	5.85494e-15
Ubr3	8025.72	1.18185	0.0927962	12.736	3.73069e-37	9.51522e-35
MED1	4188.07	1.18039	0.0782166	15.0913	1.84634e-51	9.41828e-49
CG4554	3527.14	1.1702	0.118696	9.85877	6.28154e-23	5.9687e-21
Apl	234.822	1.1699	0.261162	4.47961	7.47798e-06	6.37437e-05
SCOT	400.156	1.16106	0.125058	9.28421	1.62911e-20	1.3049e-18
CG6276	773.361	1.15777	0.122546	9.4476	3.46673e-21	2.97341e-19
IleRS	4277.23	1.14762	0.108861	10.542	5.52822e-26	6.78221e-24
CG13204	146.858	1.14351	0.186201	6.14126	8.18707e-10	1.65656e-08
CG5789	6041.83	1.12988	0.0724844	15.588	8.78816e-55	5.32343e-52
Tfb1	2105.42	1.12026	0.069194	16.1901	5.92028e-59	3.82529e-56
CG12194	14.5444	1.1068	0.386998	2.85996	0.00423696	0.0154961
PIG-O	1088.34	1.1048	0.102176	10.8128	2.99431e-27	4.03067e-25
aft	764.642	1.09433	0.118401	9.24256	2.40677e-20	1.89646e-18
Lrpprc2	905.011	1.08484	0.131042	8.27862	1.24614e-16	6.67273e-15
CG3021	469.365	1.08257	0.12914	8.38294	5.16214e-17	3.05051e-15
S2P	481.854	1.07507	0.111273	9.66154	4.39194e-22	3.9052e-20
alphaCOP	2924.73	1.07066	0.143052	7.4844	7.18749e-14	2.66757e-12
GstO2	1060.07	1.05905	0.0893272	11.8558	2.00743e-32	3.81491e-30
pico	8569.07	1.05489	0.0605568	17.4198	5.8398e-68	4.71661e-65
ELOVL	374.461	1.05231	0.225629	4.66391	3.10256e-06	2.90532e-05
spict	878.008	1.05078	0.11927	8.81003	1.25112e-18	8.53934e-17
Ttd14	2426.66	1.04595	0.152181	6.87309	6.28272e-12	1.80689e-10
Aasdh	555.948	1.04278	0.119911	8.69631	3.4284e-18	2.21521e-16
xit	267.054	1.04102	0.167383	6.21937	4.99155e-10	1.06092e-08
CG8353	44.565	1.0378	0.305989	3.39161	0.000694838	0.00335177
IntS1	2650.72	1.03705	0.124534	8.32741	8.26334e-17	4.62938e-15
Rme-8	5380.98	1.03476	0.0959883	10.7801	4.27562e-27	5.67662e-25
woc	9365.96	1.02952	0.128523	8.01039	1.1435e-15	5.30276e-14
fs(1)M3	8201.21	1.02446	0.0925817	11.0654	1.84556e-28	2.71018e-26
Prosalpha2	2686.89	1.01828	0.159325	6.39121	1.64577e-10	3.79781e-09
CG13014	354.124	1.01585	0.140566	7.2268	4.94517e-13	1.64139e-11
spd-2	5917.41	1.01353	0.0925244	10.9542	6.34085e-28	9.03757e-26
CG8520	889.05	1.00906	0.0994682	10.1445	3.50391e-24	3.73186e-22
Not1	17028.4	1.00008	0.134971	7.40956	1.26715e-13	4.58253e-12
dao	19.1303	0.997735	0.386621	2.58065	0.00986131	0.0314291
Nup93-1	2316.88	0.99584	0.0867817	11.4752	1.75723e-30	2.93639e-28
Dhc64C	16123.8	0.995256	0.138815	7.16963	7.51998e-13	2.44576e-11
CG17841	1921.12	0.994049	0.0698484	14.2315	5.83977e-46	2.46083e-43
Ir7b	11.8041	0.993531	0.399295	2.48821	0.0128387	0.0392375
rho-5	33.7019	0.990286	0.34309	2.88638	0.00389704	0.0144381
CG17829	997.313	0.987053	0.0920757	10.72	8.19917e-27	1.04561e-24
CG13531	2324.74	0.986909	0.107659	9.16696	4.86566e-20	3.77264e-18
CG10747	328.049	0.975222	0.164913	5.91355	3.34805e-09	6.07665e-08
CG4041	1206.43	0.974457	0.110353	8.83037	1.04332e-18	7.1715e-17
CPT2	354.21	0.974338	0.20454	4.76356	1.90205e-06	1.89643e-05
Grip84	4214.9	0.97151	0.080655	12.0453	2.05451e-33	4.06373e-31
CG31793	937.992	0.967036	0.0960726	10.0657	7.8339e-24	8.1641e-22
alpha-Est2	2.94911	0.961972	0.382272	2.51646	0.011854	0.0366729
Arts	2945.75	0.95937	0.0855122	11.2191	3.28584e-29	5.22071e-27
Ada1-1	34.1065	0.955444	0.331232	2.88452	0.00392015	0.0145071
CG18273	2289.13	0.950084	0.0811721	11.7046	1.20786e-31	2.20879e-29
shtd	4395.74	0.944967	0.132573	7.1279	1.01913e-12	3.27068e-11
CG6659	1415.75	0.940387	0.0920526	10.2158	1.6856e-24	1.84399e-22
PI4KIIIalpha	5590.83	0.936796	0.0669828	13.9856	1.90768e-44	6.84788e-42
mbo	1060.61	0.93244	0.0896819	10.3972	2.55338e-25	2.94611e-23
ea	969.679	0.930501	0.0902925	10.3054	6.66052e-25	7.41997e-23
Leash	496.329	0.921698	0.114267	8.06619	7.25289e-16	3.49726e-14
Gcn2	2155.7	0.921017	0.139226	6.61527	3.70868e-11	9.61083e-10
Sdic4	21.9916	0.917363	0.392999	2.33426	0.0195821	0.0553484
CG12773	2509.2	0.916773	0.0710185	12.9089	4.00884e-38	1.14276e-35
CG7600	1543.39	0.916653	0.0825245	11.1077	1.1515e-28	1.7438e-26
CG9467	1363.29	0.914366	0.126081	7.25219	4.10085e-13	1.38005e-11
CG14785	27.5966	0.91416	0.337814	2.70611	0.00680768	0.0230861
CG4293	454.876	0.90703	0.135895	6.6745	2.48078e-11	6.58731e-10
Oseg6	581.381	0.903099	0.109657	8.2357	1.78513e-16	9.25213e-15
slif	4482.19	0.902166	0.108481	8.31636	9.07052e-17	5.05239e-15
chb	4677.06	0.900708	0.098242	9.16826	4.80726e-20	3.75742e-18
HDAC6	2767.79	0.899864	0.072699	12.378	3.43995e-35	7.75348e-33
CG14613	939.545	0.897422	0.113299	7.92086	2.35882e-15	1.04664e-13
ctrip	18989.4	0.897111	0.114862	7.81033	5.70401e-15	2.41412e-13
CG42269	28.2968	0.890111	0.366626	2.42785	0.0151888	0.0449907
pic	5221.18	0.889837	0.0813487	10.9386	7.53927e-28	1.04387e-25
rictor	4409.18	0.889392	0.119063	7.4699	8.02557e-14	2.95756e-12
beta4GalNAcTB	551.507	0.888195	0.127254	6.97971	2.958e-12	8.95904e-11
p115	1001.64	0.887918	0.106216	8.35951	6.2977e-17	3.61168e-15
mv	2500.23	0.88713	0.174502	5.08379	3.69982e-07	4.34125e-06
CG2938	7547.74	0.885083	0.0949387	9.32268	1.13437e-20	9.16196e-19
CG13921	960.952	0.883084	0.111493	7.92053	2.36498e-15	1.04664e-13
Vm32E	3843.44	0.882564	0.150692	5.85674	4.72035e-09	8.33327e-08
Adgf-A	68.0351	0.877648	0.244592	3.58822	0.000332945	0.00177987
yata	3019.8	0.877505	0.0680636	12.8924	4.96546e-38	1.37501e-35
eIF3l	2676.06	0.876931	0.07104	12.3442	5.23566e-35	1.15327e-32
CG42797	2885.27	0.876303	0.0971658	9.01864	1.90439e-19	1.40895e-17
Elys	3320.89	0.874519	0.143552	6.09198	1.1152e-09	2.21689e-08
Nup154	3993.58	0.873767	0.0760312	11.4922	1.44358e-30	2.49843e-28
mAcon1	5187.19	0.868848	0.0836085	10.3919	2.70054e-25	3.05919e-23
CG14314	11.9742	0.867237	0.405153	2.14052	0.032313	0.082188
CG18446	1886.33	0.865146	0.0807279	10.7168	8.48755e-27	1.06833e-24
MED23	988.519	0.864748	0.161709	5.34754	8.91571e-08	1.19188e-06
r	2793.39	0.862706	0.108143	7.97748	1.49355e-15	6.82808e-14
CG8036	4340.39	0.858758	0.0970104	8.85222	8.57935e-19	5.93936e-17
CG7985	355.681	0.85626	0.137066	6.24708	4.18207e-10	9.04746e-09
CG44774	1426.32	0.856137	0.0868557	9.85701	6.39238e-23	6.01504e-21
CG17440	10.8952	0.855559	0.408482	2.09449	0.0362167	0.0898104
CG17754	1514.3	0.853991	0.113757	7.50714	6.04352e-14	2.2703e-12
Wdr81	1500.24	0.853233	0.100249	8.51112	1.72264e-17	1.06343e-15
Orct2	97.2126	0.849314	0.260044	3.26603	0.00109065	0.00496738
Orct	31.685	0.848247	0.337464	2.5136	0.0119508	0.0369339
Prp8	9853.4	0.846561	0.0933829	9.06548	1.24057e-19	9.32063e-18
Nup160	1244.17	0.844744	0.151095	5.59082	2.26004e-08	3.43328e-07
CG7970	826.212	0.84415	0.100808	8.37384	5.57684e-17	3.23657e-15
ast	737.24	0.843513	0.131742	6.40279	1.52568e-10	3.55453e-09
Ctr9	2200.19	0.842308	0.0625807	13.4595	2.70569e-41	8.74119e-39
ago	11043	0.840632	0.067377	12.4765	1.00244e-35	2.3875e-33
TM9SF2	1863.33	0.839949	0.0856249	9.80965	1.02328e-22	9.35623e-21
rpk	3231.17	0.839036	0.0672523	12.4759	1.00998e-35	2.3875e-33
Cog3	758.516	0.837275	0.0978846	8.5537	1.19208e-17	7.45399e-16
Alg3	408.19	0.836262	0.122093	6.84938	7.41715e-12	2.10812e-10
Sras	452.013	0.835647	0.135693	6.15837	7.34966e-10	1.49964e-08
eEF2	65858.8	0.83384	0.0829696	10.0499	9.19181e-24	9.47734e-22
Pfas	2227.43	0.833757	0.0956439	8.7173	2.84917e-18	1.86582e-16
CG9485	2664.79	0.830819	0.11249	7.3857	1.5165e-13	5.44366e-12
CG11123	808.904	0.83062	0.0913478	9.09294	9.63996e-20	7.29926e-18
CG6903	946.66	0.826585	0.0906627	9.11715	7.71246e-20	5.88576e-18
CG11414	2235.2	0.826301	0.0913315	9.04727	1.46581e-19	1.09282e-17
TTLL12	556.475	0.826288	0.117982	7.00353	2.49599e-12	7.60727e-11
asp	7090	0.823599	0.107179	7.68434	1.53788e-14	6.15916e-13
Fit2	1182.58	0.822523	0.0850469	9.6714	3.98899e-22	3.57974e-20
Ice2	578.333	0.821494	0.104403	7.86851	3.58897e-15	1.55287e-13
cno	7775.46	0.820084	0.114068	7.18941	6.50709e-13	2.13786e-11
fs(1)N	6919.77	0.815656	0.0736523	11.0744	1.66961e-28	2.48952e-26
CG32533	658.8	0.814716	0.105348	7.7336	1.04548e-14	4.27543e-13
asRNA:CR43463	325.377	0.813123	0.143906	5.65038	1.60097e-08	2.53955e-07
out	2240.59	0.809998	0.132345	6.12037	9.33571e-10	1.87333e-08
dob	582.731	0.805039	0.13822	5.82433	5.73427e-09	9.92438e-08
slbo	20.1575	0.803223	0.373825	2.14866	0.0316614	0.0809901
drosha	1431.43	0.802493	0.103008	7.79058	6.67006e-15	2.78647e-13
MRP	7150.58	0.802139	0.056686	14.1506	1.85268e-45	7.18246e-43
PheRS-m	266.724	0.800338	0.139762	5.72643	1.02566e-08	1.70511e-07
l(2)k05819	3041.61	0.800097	0.103524	7.72864	1.08703e-14	4.40816e-13
CG2747	4584.05	0.799115	0.117528	6.79936	1.05082e-11	2.91821e-10
CG9281	7394.57	0.795834	0.0806048	9.87329	5.43524e-23	5.21568e-21
w	23294.9	0.794023	0.154198	5.14938	2.61344e-07	3.16618e-06
Snx16	1045.49	0.793276	0.0833441	9.51809	1.7639e-21	1.52641e-19
CG4594	344.402	0.792429	0.132165	5.99575	2.02552e-09	3.84176e-08
CG5644	58.5962	0.790579	0.344622	2.29405	0.0217878	0.0601446
Nup98-96	7413.08	0.78899	0.0953292	8.27648	1.26868e-16	6.72056e-15
foi	3018.27	0.788154	0.0882243	8.93352	4.12678e-19	2.94094e-17
numb	2162.27	0.788133	0.0787257	10.0111	1.36189e-23	1.37494e-21
c11.1	3519.26	0.787467	0.0881347	8.93481	4.07871e-19	2.92821e-17
Sec61alpha	3495.34	0.786995	0.149363	5.26902	1.37153e-07	1.76298e-06
iPLA2-VIA	3021.6	0.78639	0.080135	9.81332	9.86688e-23	9.1076e-21
fs(1)K10	7779.4	0.786343	0.118002	6.6638	2.6683e-11	7.06588e-10
exp	14.7561	0.785274	0.386439	2.03208	0.0421459	0.101309
CG5326	375.398	0.783472	0.24667	3.1762	0.00149218	0.00647658
kz	1208.37	0.782336	0.137623	5.68465	1.31081e-08	2.12436e-07
sut1	3964.99	0.781224	0.0643636	12.1377	6.66947e-34	1.37533e-31
Papst2	454.997	0.779553	0.106857	7.29531	2.97971e-13	1.02047e-11
defl	564.414	0.778884	0.120774	6.4491	1.12514e-10	2.71264e-09
pns	4164.32	0.77872	0.0525217	14.8266	9.85591e-50	4.77617e-47
RpII215	8150.2	0.776523	0.0824037	9.4234	4.36718e-21	3.64886e-19
sl	2426.73	0.773064	0.0664364	11.6362	2.69888e-31	4.84399e-29
Vha55	10592.6	0.77026	0.042258	18.2275	3.12008e-74	3.02398e-71
CG14945	25.7991	0.767841	0.345315	2.2236	0.0261757	0.0698306
Mms19	964.376	0.766619	0.12732	6.0212	1.7313e-09	3.33593e-08
AlaRS-m	650.122	0.764182	0.110274	6.92983	4.21341e-12	1.24206e-10
tsl	35.3118	0.764153	0.327196	2.33546	0.0195196	0.055188
CSN1b	793.237	0.763588	0.134581	5.67382	1.39649e-08	2.24085e-07
CG34126	2329.58	0.763296	0.114638	6.65831	2.76986e-11	7.31484e-10
Sec5	693.729	0.761155	0.118156	6.44194	1.17953e-10	2.82273e-09
CG7091	1962.53	0.761072	0.101523	7.49652	6.55342e-14	2.45234e-12
wfs1	605.91	0.760767	0.0965519	7.87936	3.29071e-15	1.43021e-13
GCS1	1469.36	0.760161	0.0811625	9.36591	7.53981e-21	6.19287e-19
Chc	10093.6	0.75981	0.0973857	7.80207	6.09013e-15	2.55522e-13
CG5270	3292.26	0.759715	0.0904055	8.40342	4.33666e-17	2.57858e-15
Med	1077.87	0.758419	0.151188	5.0164	5.26473e-07	5.91947e-06
CG13671	710.244	0.757959	0.129437	5.8558	4.74725e-09	8.35033e-08
Cpsf160	3276.72	0.756954	0.0974407	7.76835	7.95135e-15	3.29336e-13
IntS2	1759.3	0.75652	0.0753887	10.0349	1.0704e-23	1.09204e-21
Sec24CD	2990.05	0.755266	0.104058	7.2581	3.9257e-13	1.33035e-11
Stt3A	2422.77	0.753564	0.0686098	10.9833	4.59694e-28	6.64978e-26
bw	3.68922	0.753145	0.392513	1.91878	0.0550127	0.124984
Cdk5	445.141	0.752775	0.136411	5.51841	3.42076e-08	5.0006e-07
CG7414	6228.11	0.748888	0.101821	7.35497	1.90965e-13	6.77961e-12
dhd	35448.5	0.748414	0.0831116	9.00493	2.15798e-19	1.58448e-17
CG44249	13176	0.748311	0.0996447	7.5098	5.92183e-14	2.24197e-12
fj	3.4252	0.747876	0.39302	1.9029	0.0570539	0.12851
Nup58	655.403	0.74785	0.180257	4.14881	3.34208e-05	0.000238875
Impbeta11	2041.61	0.745361	0.089819	8.29848	1.05453e-16	5.80712e-15
CG7149	147.069	0.7419	0.214711	3.45535	0.000549585	0.00273298
RpII140	2511.32	0.740798	0.0972882	7.61447	2.64778e-14	1.0224e-12
CG33970	186.461	0.74016	0.234065	3.16219	0.00156585	0.00673601
Fatp3	830.118	0.738635	0.0946108	7.80708	5.85262e-15	2.46624e-13
Vha68-2	6240.11	0.738204	0.0996992	7.40432	1.31829e-13	4.74975e-12
BTBD9	1299.5	0.737551	0.14273	5.16744	2.3732e-07	2.89685e-06
por	500.989	0.737222	0.109323	6.74349	1.54628e-11	4.19791e-10
CG3618	405.56	0.735489	0.14787	4.97388	6.56254e-07	7.20319e-06
sPLA2	7.1896	0.735349	0.409747	1.79464	0.0727111	0.155842
pcm	2305.64	0.733239	0.132261	5.54387	2.95854e-08	4.4182e-07
CG6752	333.465	0.733018	0.14799	4.95317	7.30138e-07	7.94219e-06
Rift	838.501	0.732353	0.0925725	7.91113	2.55056e-15	1.12364e-13
CG4752	766.481	0.731843	0.115935	6.31254	2.7449e-10	6.17252e-09
CG6126	557.944	0.730547	0.129469	5.64266	1.67445e-08	2.63453e-07
dome	2391.08	0.730521	0.144891	5.04186	4.61021e-07	5.2941e-06
Ssl1	440.412	0.728646	0.172388	4.22677	2.37069e-05	0.000176202
GluProRS	3404.55	0.72739	0.107777	6.74901	1.48855e-11	4.05253e-10
Bug22	487.973	0.726356	0.136833	5.30835	1.10621e-07	1.4508e-06
CG1824	1150.67	0.72616	0.0949204	7.6502	2.00668e-14	7.906e-13
CG16974	5691.38	0.724593	0.0879719	8.23664	1.77114e-16	9.22897e-15
lncRNA:CR44472	3.80666	0.723747	0.38757	1.8674	0.0618459	0.136883
mthl5	209.996	0.723742	0.165716	4.36736	1.2576e-05	0.000100649
Pi3K68D	3861.19	0.723029	0.0856238	8.44425	3.05996e-17	1.83068e-15
gry	2496.1	0.722647	0.0734554	9.83791	7.73007e-23	7.20383e-21
m-cup	1279.15	0.72191	0.102892	7.01616	2.28056e-12	7.06173e-11
ClC-c	2514.46	0.719835	0.0915679	7.86122	3.80418e-15	1.62423e-13
rod	2526.57	0.719427	0.107116	6.71632	1.86374e-11	5.0037e-10
MFS18	1427.76	0.719131	0.0868887	8.27646	1.26895e-16	6.72056e-15
HDAC1	3088.85	0.718544	0.0978248	7.34521	2.0543e-13	7.26652e-12
Diap2	1772.36	0.718468	0.0986729	7.28131	3.30583e-13	1.12817e-11
Naa60	794.54	0.717816	0.117659	6.10083	1.05518e-09	2.10429e-08
CG16896	1125.81	0.717437	0.1123	6.38861	1.67403e-10	3.84537e-09
Neurl4	1276.15	0.716937	0.114331	6.27071	3.59398e-10	7.88073e-09
TM9SF4	1033.58	0.716362	0.106954	6.69788	2.11467e-11	5.64611e-10
RanBPM	2883.57	0.716167	0.117562	6.09184	1.11622e-09	2.21689e-08
CG4238	2198.71	0.715549	0.068115	10.505	8.19111e-26	9.68149e-24
Vml	5139.68	0.713906	0.214189	3.33306	0.000858959	0.00402176
TTLL4B	98.5163	0.71182	0.244391	2.91262	0.00358409	0.0135163
GstT3	395.882	0.71113	0.152627	4.65926	3.17348e-06	2.95768e-05
puf	6111.58	0.709094	0.141105	5.0253	5.02647e-07	5.69119e-06
Sra-1	2746.96	0.708879	0.0825716	8.58502	9.08183e-18	5.71565e-16
Edem1	1389.9	0.708352	0.0873681	8.10767	5.15985e-16	2.53854e-14
mei-41	2005.47	0.706083	0.0898121	7.86178	3.78724e-15	1.62416e-13
CG9934	2011.98	0.705113	0.163004	4.32574	1.52018e-05	0.000119688
CG7627	12640.7	0.704638	0.0656216	10.7379	6.7565e-27	8.7312e-25
CG3149	330.088	0.704102	0.16895	4.16752	3.07937e-05	0.000222123
Art7	631.217	0.700041	0.124205	5.63616	1.73887e-08	2.71387e-07
Pal1	1870.14	0.699986	0.0794896	8.80601	1.29685e-18	8.78954e-17
raptor	4512.35	0.698108	0.0963078	7.24871	4.2075e-13	1.41104e-11
TyrRS	1525.59	0.697746	0.079635	8.76181	1.92146e-18	1.26685e-16
gig	2008.02	0.6977	0.0891583	7.82541	5.05999e-15	2.15094e-13
Sk2	1233.06	0.695096	0.0900888	7.71568	1.20338e-14	4.85965e-13
CG32095	538.408	0.694886	0.110829	6.26986	3.61369e-10	7.90607e-09
p38b	817.139	0.692856	0.0881018	7.86427	3.71253e-15	1.59919e-13
Nep1	28.4481	0.69283	0.333243	2.07906	0.0376122	0.0924518
CG3815	1359.47	0.692081	0.14817	4.67086	2.99945e-06	2.82631e-05
CG33003	7.17678	0.692023	0.40927	1.69087	0.0908612	0.185006
Wsck	398.288	0.692017	0.137462	5.03426	4.79707e-07	5.46979e-06
CG5339	785.198	0.691994	0.0908516	7.61675	2.60138e-14	1.0085e-12
Cand1	1669.39	0.691818	0.123726	5.59153	2.25076e-08	3.42455e-07
CG7806	2264.87	0.691429	0.0722603	9.56859	1.08376e-21	9.5489e-20
Bruce	11216	0.691316	0.142344	4.85666	1.19382e-06	1.24414e-05
CG3831	1104.78	0.690648	0.112835	6.12086	9.30693e-10	1.87143e-08
laza	70.661	0.690349	0.261613	2.63882	0.0083196	0.0272623
ca	2336.34	0.69017	0.134416	5.13458	2.82782e-07	3.39198e-06
CG10444	1601.15	0.689857	0.138388	4.98496	6.19752e-07	6.85689e-06
Cyp12d1-p	25.2888	0.689742	0.355612	1.93959	0.0524294	0.120528
Pex6	709.757	0.689484	0.0975566	7.06753	1.5772e-12	4.93104e-11
Smox	2174.54	0.687004	0.106068	6.47704	9.35389e-11	2.29514e-09
PGAP1	1037.14	0.686448	0.0923316	7.4346	1.04886e-13	3.82162e-12
Cdc23	540.253	0.686261	0.155176	4.42246	9.7584e-06	8.06983e-05
Patsas	99.8795	0.684954	0.23821	2.87542	0.00403494	0.0148751
Ctl2	2511.27	0.683074	0.0816978	8.36098	6.22005e-17	3.58838e-15
CG14561	111.388	0.682921	0.246333	2.77235	0.00556528	0.0195147
CG8155	1828.03	0.681612	0.0987504	6.90238	5.11397e-12	1.48843e-10
CG16952	1759.49	0.681194	0.0835204	8.15601	3.46268e-16	1.73887e-14
Dcr-1	2488.23	0.680541	0.110431	6.16258	7.15671e-10	1.46335e-08
pix	4099.15	0.680193	0.0962872	7.06421	1.61538e-12	5.03416e-11
CG6293	2076.11	0.679861	0.117829	5.76992	7.93099e-09	1.33682e-07
CG17751	3.5484	0.679761	0.339381	2.00294	0.0451832	0.10728
E2f2	2295.97	0.679193	0.114842	5.91416	3.33565e-09	6.06551e-08
Xpd	1084.21	0.678822	0.0814711	8.33206	7.94504e-17	4.50312e-15
asRNA:CR44892	7.93256	0.678745	0.410401	1.65386	0.098156	0.196004
CG11141	1070.78	0.678487	0.0798034	8.50197	1.86398e-17	1.1434e-15
CG14803	1723.31	0.678268	0.0831771	8.1545	3.50628e-16	1.75169e-14
wisp	11938.6	0.677973	0.126809	5.34641	8.9715e-08	1.19604e-06
Slh	773.542	0.67681	0.104726	6.46268	1.02865e-10	2.48619e-09
dpn	27.9199	0.676765	0.347546	1.94727	0.0515026	0.118848
mtRNApol	1004.57	0.676297	0.107531	6.28933	3.1883e-10	7.05502e-09
CG15099	4110.65	0.675875	0.103204	6.54895	5.79433e-11	1.45867e-09
JhI-21	1705.74	0.675671	0.094522	7.1483	8.78617e-13	2.83852e-11
CG14516	5508.03	0.675189	0.0683382	9.88011	5.07779e-23	4.97111e-21
Cyp6a13	60.7662	0.671771	0.298924	2.2473	0.0246208	0.0664693
CG16868	2325.54	0.671543	0.114678	5.85591	4.74419e-09	8.35033e-08
Ubi-p5E	8532.34	0.670531	0.129276	5.18683	2.13903e-07	2.64095e-06
LysRS	3386.53	0.670118	0.0753344	8.89524	5.8291e-19	4.09388e-17
PTP-ER	1986.44	0.669526	0.0808686	8.27918	1.24028e-16	6.67273e-15
Vps39	567.87	0.668359	0.129442	5.16339	2.42516e-07	2.95656e-06
Spg7	1020.1	0.667146	0.138414	4.81993	1.43609e-06	1.47131e-05
CG6675	9.58559	0.665568	0.409304	1.6261	0.103929	0.204192
poe	10704.9	0.665272	0.216168	3.07757	0.00208695	0.00855615
Karybeta3	13417.4	0.663824	0.0518648	12.7991	1.65804e-37	4.46381e-35
CG32318	48.9778	0.663037	0.315335	2.10264	0.0354972	0.0885328
MetRS	2155.62	0.661843	0.0838867	7.88973	3.02846e-15	1.32571e-13
PIG-G	777.591	0.661295	0.0866442	7.6323	2.3061e-14	9.02189e-13
Ltn1	2700.15	0.660774	0.0723211	9.13668	6.4401e-20	4.95376e-18
CG16989	1368.19	0.659903	0.0827909	7.97072	1.57758e-15	7.17836e-14
dmGlut	2545.87	0.658379	0.0815555	8.07278	6.87163e-16	3.32999e-14
sad	82.0898	0.657885	0.234751	2.80248	0.00507109	0.018043
CG6428	1161.49	0.656154	0.109322	6.00204	1.94854e-09	3.71026e-08
AdSL	1053.84	0.652725	0.115066	5.67262	1.40626e-08	2.24909e-07
GlyP	3316.87	0.65155	0.14778	4.40892	1.03887e-05	8.52505e-05
CG3558	2471.97	0.649717	0.0851921	7.6265	2.41213e-14	9.38888e-13
adp	849.321	0.648786	0.121261	5.35033	8.77926e-08	1.17688e-06
Alg10	348.479	0.648604	0.138864	4.67077	3.00069e-06	2.82631e-05
Sac1	1529.53	0.648235	0.073883	8.77381	1.72725e-18	1.14661e-16
mid	58.2959	0.647958	0.330518	1.96043	0.0499455	0.115945
Lrr47	234.675	0.647222	0.156147	4.14495	3.39883e-05	0.000242574
GlyS	2785.13	0.646811	0.0863501	7.49057	6.85756e-14	2.55629e-12
PGAP2	234.412	0.644705	0.151256	4.26236	2.02282e-05	0.000152926
wls	1105.19	0.64419	0.103994	6.19449	5.84732e-10	1.22667e-08
MED14	2889	0.643989	0.102847	6.26164	3.80941e-10	8.29681e-09
TRAM	1040.63	0.642387	0.158111	4.06289	4.84687e-05	0.000328733
mio	569.645	0.642322	0.11734	5.47404	4.39897e-08	6.31626e-07
sll	656.915	0.642031	0.0905226	7.0925	1.31715e-12	4.19928e-11
CG15822	96.8074	0.641647	0.256494	2.5016	0.0123632	0.0379672
Sbf	1700.4	0.641566	0.135454	4.73643	2.17518e-06	2.13379e-05
NaPi-T	17.7421	0.640657	0.406757	1.57504	0.115248	0.221054
CG7638	1520.97	0.640539	0.106662	6.0053	1.90975e-09	3.64357e-08
Sec71	2253.94	0.639414	0.0677713	9.43488	3.91433e-21	3.29893e-19
CG12118	402.778	0.639182	0.11164	5.72536	1.03218e-08	1.71299e-07
Mtp	550.804	0.638423	0.133883	4.76853	1.85578e-06	1.85616e-05
Clp	561.425	0.637852	0.138453	4.607	4.08518e-06	3.71245e-05
Tor	3321.69	0.637842	0.117378	5.43408	5.50793e-08	7.7309e-07
IntS4	1127.71	0.636216	0.135599	4.69191	2.70669e-06	2.58455e-05
wun2	1538.23	0.635838	0.0829399	7.66625	1.77102e-14	7.03474e-13
CG8031	608.948	0.635789	0.102517	6.20181	5.58172e-10	1.17349e-08
omd	1954.68	0.635401	0.0772671	8.22344	1.97749e-16	1.01407e-14
CG13148	4.1182	0.634946	0.397011	1.59932	0.10975	0.212654
CG7718	814.447	0.633603	0.112303	5.64191	1.68172e-08	2.64169e-07
Sec31	1874.75	0.633272	0.142116	4.45603	8.349e-06	7.03028e-05
eIF3c	6542.54	0.632512	0.0729594	8.66937	4.34523e-18	2.77066e-16
CG1582	1641.71	0.632352	0.112186	5.63664	1.73398e-08	2.71059e-07
nSMase	1207.74	0.631004	0.0831474	7.58897	3.22447e-14	1.23524e-12
cue	4337.39	0.630479	0.100467	6.27552	3.48474e-10	7.65854e-09
l(3)72Ab	3438.61	0.630016	0.119115	5.28913	1.22899e-07	1.59885e-06
CG7730	1057	0.629809	0.110164	5.71701	1.08417e-08	1.79313e-07
Epg5	3178.53	0.629654	0.12285	5.12539	2.96917e-07	3.55713e-06
Ns4	681.811	0.628958	0.180262	3.48914	0.000484579	0.00245764
CG4476	2294.34	0.628913	0.164222	3.82965	0.000128326	0.000776361
CG2277	778.735	0.628674	0.129591	4.85122	1.22705e-06	1.27329e-05
Or2a	349.777	0.627809	0.168065	3.73552	0.000187325	0.0010794
TM9SF3	1305.27	0.627742	0.13202	4.7549	1.98548e-06	1.96761e-05
Nf-YC	1374.44	0.627556	0.0979332	6.408	1.47441e-10	3.45168e-09
Catsup	358.351	0.627164	0.185485	3.38121	0.000721687	0.00346112
CG9723	540.246	0.626274	0.124677	5.02316	5.08274e-07	5.74148e-06
GlcT	757.864	0.626006	0.15778	3.96759	7.26023e-05	0.000469734
Tsc1	1820.59	0.625734	0.147866	4.23175	2.31875e-05	0.000172739
CG3309	851.955	0.62529	0.11118	5.62413	1.86443e-08	2.86826e-07
Nepl4	48.1137	0.62462	0.327551	1.90694	0.0565285	0.12771
spg	1914.47	0.623691	0.115391	5.40503	6.47977e-08	8.90807e-07
ttm50	969.432	0.623461	0.0947503	6.58005	4.70305e-11	1.19638e-09
Pi3K92E	2414.37	0.62161	0.0847442	7.33513	2.21498e-13	7.77813e-12
PIG-N	296.863	0.621098	0.143733	4.32118	1.55194e-05	0.000121793
Cap-D2	1170.61	0.620948	0.109932	5.64849	1.61863e-08	2.55501e-07
CG17896	2220.64	0.620344	0.117156	5.29501	1.19011e-07	1.55452e-06
Adck	470.209	0.619256	0.112123	5.52303	3.33207e-08	4.91544e-07
Trc8	1780	0.618973	0.0728937	8.49145	2.04079e-17	1.22853e-15
CG31262	359.051	0.618702	0.129466	4.77888	1.76275e-06	1.77779e-05
CG30183	2645.26	0.618062	0.104589	5.90945	3.43252e-09	6.20987e-08
CG44153	7.7697	0.617341	0.412707	1.49584	0.134696	0.248947
dop	4284.27	0.6172	0.12012	5.13819	2.77397e-07	3.33979e-06
fu	963.404	0.617017	0.110389	5.58946	2.27776e-08	3.45478e-07
CG15439	1447.7	0.616997	0.0903632	6.82797	8.61254e-12	2.4195e-10
BRWD3	5247.2	0.616463	0.13712	4.49579	6.93115e-06	5.9501e-05
Sec24AB	1873.48	0.614784	0.156991	3.91604	9.00145e-05	0.000568352
Fancl	178.029	0.61461	0.183281	3.35339	0.000798293	0.00376866
Dip-C	776.058	0.61451	0.0934893	6.57306	4.92925e-11	1.25023e-09
CG6923	1537.95	0.614248	0.164229	3.74019	0.000183878	0.0010627
GlcAT-I	642.745	0.61403	0.112893	5.43903	5.35703e-08	7.55755e-07
Nup93-2	683.225	0.61399	0.103184	5.95042	2.6746e-09	4.95645e-08
Cdk1	1630.7	0.612859	0.0988016	6.20293	5.54224e-10	1.16773e-08
Spn42Da	528.569	0.611465	0.110971	5.51014	3.58542e-08	5.22554e-07
Usp32	3835.88	0.611204	0.0538306	11.3542	7.06801e-30	1.14172e-27
Dis3	1266.43	0.611169	0.0885012	6.90577	4.9932e-12	1.45765e-10
Nup107	1150.03	0.610179	0.107712	5.6649	1.47113e-08	2.33741e-07
CG12237	1885.3	0.608865	0.0832988	7.3094	2.68331e-13	9.28808e-12
CG7458	1056.33	0.607266	0.111377	5.45236	4.97056e-08	7.05339e-07
Sf3b1	1789.03	0.606508	0.101166	5.99518	2.03262e-09	3.84769e-08
CG5002	32.9989	0.604064	0.319819	1.88877	0.058923	0.131586
CG5021	700.029	0.603832	0.100907	5.98402	2.17697e-09	4.1049e-08
CG2187	872.033	0.603388	0.144362	4.17968	2.91923e-05	0.000211958
Spp	1076.81	0.603254	0.13891	4.34277	1.40701e-05	0.000111593
Dip-B	7133.3	0.603079	0.0981292	6.14576	7.95808e-10	1.61698e-08
Cog1	985.053	0.602822	0.110034	5.4785	4.28956e-08	6.17747e-07
psidin	1266.35	0.602443	0.120005	5.02014	5.16338e-07	5.81901e-06
CG10013	23.1992	0.602028	0.359472	1.67476	0.0939821	0.189726
tilB	22.1988	0.600295	0.364687	1.64606	0.0997523	0.198115
nonC	2917.13	0.600182	0.146676	4.09188	4.27892e-05	0.000295379
CG8420	388.48	0.599627	0.131325	4.56598	4.9716e-06	4.4369e-05
Tsp3A	128.178	0.598823	0.191852	3.12127	0.00180072	0.00756835
CG6230	1736.58	0.598739	0.100066	5.98346	2.1845e-09	4.1111e-08
CDC45L	2310.51	0.598627	0.0864469	6.92479	4.36621e-12	1.27847e-10
ACC	7619.19	0.598573	0.102959	5.81372	6.11012e-09	1.05185e-07
Tsr1	2162.39	0.597769	0.081464	7.33782	2.17097e-13	7.6513e-12
CG4552	767.945	0.597202	0.0902442	6.61763	3.65007e-11	9.53544e-10
phm	35.1235	0.597089	0.321736	1.85584	0.0634769	0.139759
Nup214	3705.11	0.59555	0.0965222	6.17008	6.82547e-10	1.40451e-08
CG14511	219.533	0.595023	0.189722	3.13629	0.00171099	0.00726683
Ranbp21	3818.89	0.594838	0.107655	5.52542	3.28707e-08	4.86386e-07
CG33090	2018.2	0.594693	0.0794623	7.48397	7.21114e-14	2.66757e-12
CG8111	417.459	0.594588	0.128471	4.62821	3.68847e-06	3.3757e-05
btz	819.876	0.594359	0.154627	3.84382	0.000121136	0.000738393
blot	3426.33	0.59405	0.0871171	6.81897	9.16926e-12	2.56845e-10
rasp	895.362	0.593923	0.129953	4.57029	4.8705e-06	4.35469e-05
meigo	887.025	0.59336	0.0812771	7.30046	2.86792e-13	9.8567e-12
Vps13B	2487.52	0.593257	0.0817433	7.25756	3.94148e-13	1.33104e-11
CG4025	129.771	0.593164	0.261401	2.26917	0.023258	0.0633193
CG32369	409.058	0.593139	0.279631	2.12115	0.0339094	0.0853192
Miga	1611.72	0.59311	0.111724	5.30869	1.10414e-07	1.45004e-06
CG14562	1915.19	0.592899	0.0707883	8.37566	5.49147e-17	3.20622e-15
Trap1	1195.06	0.592843	0.0926199	6.40082	1.54547e-10	3.58343e-09
ema	1615.24	0.592747	0.0714482	8.29618	1.07514e-16	5.85494e-15
CG4586	2033.7	0.591802	0.0926344	6.38858	1.67431e-10	3.84537e-09
Ugt316A1	2179.41	0.591801	0.107017	5.52997	3.2029e-08	4.76112e-07
Picot	366.993	0.591134	0.13496	4.38007	1.1864e-05	9.57416e-05
muskelin	4551.5	0.590679	0.0692858	8.52525	1.52478e-17	9.47317e-16
Bap170	4360.34	0.590353	0.120847	4.88511	1.0337e-06	1.09733e-05
temp	808.488	0.590051	0.0912384	6.46714	9.98748e-11	2.43213e-09
Coprox	662.324	0.588662	0.155189	3.79319	0.000148723	0.000883764
dpr18	4.577	0.587611	0.401544	1.46338	0.143363	0.260641
CG5287	251.808	0.586844	0.172808	3.39594	0.000683941	0.00331107
CG4676	32.9638	0.586057	0.32931	1.77965	0.0751329	0.159901
CG10877	252.819	0.585195	0.164092	3.56625	0.000362123	0.00191577
hrm	2986.68	0.58506	0.0862546	6.78295	1.17748e-11	3.23745e-10
Galt	57.3207	0.585054	0.295847	1.97756	0.0479788	0.112267
TBC1D5	611.475	0.584913	0.148568	3.937	8.25053e-05	0.00052608
CG7943	1120.86	0.5848	0.110576	5.28868	1.23203e-07	1.60065e-06
nAChRbeta1	3.51381	0.583479	0.395205	1.4764	0.139837	0.255525
Naa15-16	5057.6	0.583195	0.0939827	6.20535	5.45767e-10	1.15241e-08
Glg1	2529.89	0.582724	0.0831178	7.01082	2.36919e-12	7.2665e-11
Sin1	665.151	0.581419	0.13902	4.18226	2.88621e-05	0.000210009
Ugalt	1164.09	0.581371	0.0958752	6.06383	1.32916e-09	2.61834e-08
CG30334	32.8165	0.5813	0.384305	1.5126	0.130381	0.242964
Sugb	1338.6	0.581213	0.106981	5.43289	5.54496e-08	7.76614e-07
FASN1	5551.59	0.58025	0.117581	4.93489	8.01972e-07	8.66163e-06
Xxylt	179.896	0.579876	0.200765	2.88833	0.00387294	0.0143543
CG14411	2693.84	0.57912	0.106418	5.44193	5.27069e-08	7.44657e-07
nst	1857.4	0.579029	0.0719496	8.0477	8.43635e-16	4.00809e-14
Efr	561.402	0.57822	0.105097	5.50176	3.76011e-08	5.47192e-07
kto	1371.99	0.578108	0.152319	3.79537	0.000147422	0.000878191
CG8311	1151.21	0.577792	0.0744083	7.76516	8.1545e-15	3.34887e-13
Taf6	683.708	0.577507	0.15044	3.83878	0.000123649	0.000752293
Dhc98D	22.3791	0.577378	0.392716	1.47022	0.141503	0.25813
CG7675	670.783	0.577269	0.166255	3.47219	0.000516222	0.00259234
H	2824.49	0.576442	0.152183	3.78782	0.000151974	0.000900878
CG9425	4285.54	0.575637	0.121637	4.73242	2.21858e-06	2.17197e-05
Cdc27	1521.84	0.575352	0.123015	4.6771	2.90962e-06	2.74587e-05
yin	10410.5	0.574603	0.11275	5.09626	3.46424e-07	4.10457e-06
Rhau	1019.16	0.574243	0.0798891	7.188	6.57484e-13	2.15282e-11
Tmtc3	1259.29	0.573958	0.0853668	6.72343	1.77497e-11	4.77862e-10
CG17169	150.341	0.57318	0.190106	3.01505	0.00256937	0.0101805
CG8818	765.806	0.572912	0.133249	4.29955	1.71143e-05	0.000132591
CG6701	4787.5	0.572511	0.0475972	12.0282	2.52511e-33	4.89467e-31
ALiX	1168.33	0.572438	0.144147	3.97121	7.15095e-05	0.000464213
CG14221	10.284	0.572187	0.402325	1.4222	0.154968	0.275776
Aladin	1097.59	0.571555	0.118004	4.8435	1.2757e-06	1.31954e-05
CG4610	666.644	0.571473	0.111577	5.12178	3.02661e-07	3.617e-06
CG4813	588.602	0.571399	0.146342	3.90455	9.43996e-05	0.000594105
BHD	144.792	0.57123	0.179942	3.17452	0.00150087	0.00651104
arm	8557.61	0.571042	0.0497135	11.4866	1.53982e-30	2.61823e-28
Lrrk	1392.55	0.570954	0.0987336	5.78277	7.34793e-09	1.24286e-07
Dic1	427.156	0.570386	0.128174	4.45008	8.58375e-06	7.20916e-05
GCS2alpha	3017.28	0.570219	0.132035	4.31868	1.56962e-05	0.000122882
CG2691	4122.69	0.570156	0.0813043	7.01261	2.33906e-12	7.19714e-11
CG10960	3389.77	0.569934	0.0898555	6.34279	2.25642e-10	5.08586e-09
GalT1	1038.37	0.569801	0.0942254	6.04722	1.47371e-09	2.8681e-08
ClC-b	804.852	0.569536	0.104967	5.42583	5.7686e-08	8.02142e-07
Der-2	716.552	0.569239	0.119217	4.77483	1.79863e-06	1.80833e-05
Cdk12	2682.93	0.568604	0.106061	5.36109	8.27212e-08	1.11197e-06
polybromo	5515.81	0.568476	0.0879413	6.46426	1.01795e-10	2.47267e-09
Nadsyn	1692.48	0.568441	0.0996461	5.7046	1.16613e-08	1.91562e-07
obe	1833.78	0.568315	0.115608	4.91588	8.83846e-07	9.51804e-06
Als2	1986.16	0.568135	0.0720125	7.88939	3.0366e-15	1.32571e-13
CG5126	333.514	0.567978	0.153821	3.69247	0.000222084	0.00124996
Stt3B	1176.37	0.567739	0.135554	4.18827	2.81085e-05	0.000204832
CG3520	503.053	0.567586	0.112753	5.03387	4.80667e-07	5.47429e-06
clos	5341.58	0.566968	0.0653847	8.67127	4.27337e-18	2.74288e-16
Gale	1407.43	0.566928	0.128369	4.4164	1.00359e-05	8.25966e-05
CG8298	896.214	0.566398	0.0814057	6.95772	3.4582e-12	1.03129e-10
l(2)37Cd	459.184	0.566307	0.133707	4.23544	2.28103e-05	0.00017006
CG9147	307.371	0.566252	0.132698	4.26721	1.97932e-05	0.00015046
Pgm2a	1681.66	0.566225	0.0686251	8.25098	1.57098e-16	8.27497e-15
ich	3.94655	0.565914	0.397709	1.42293	0.154755	0.275462
HERC2	3399.3	0.565019	0.206461	2.73669	0.00620606	0.0214206
Usp30	1298.15	0.564171	0.0687429	8.20697	2.26846e-16	1.15109e-14
eIF3b	5658.82	0.56337	0.0506395	11.1251	9.46934e-29	1.45678e-26
Sod1	2585.95	0.5633	0.132119	4.26358	2.01178e-05	0.000152417
scat	1568.35	0.563216	0.0885993	6.35689	2.05876e-10	4.67294e-09
Eogt	358.702	0.562464	0.123953	4.5377	5.68705e-06	5.01881e-05
Mcm3	1811.54	0.562313	0.0793927	7.08267	1.41401e-12	4.47861e-11
ebo	3184.86	0.562294	0.0764152	7.35841	1.86112e-13	6.6316e-12
lin	1490.22	0.562184	0.0953023	5.89896	3.65802e-09	6.58988e-08
CG32536	122.579	0.561735	0.305611	1.83807	0.0660516	0.144476
PIG-A	854.91	0.561692	0.153939	3.6488	0.000263473	0.00144679
CG13295	354.315	0.561573	0.142777	3.93323	8.38131e-05	0.000533802
SppL	954.532	0.560645	0.107606	5.21015	1.88688e-07	2.35363e-06
Tsf2	1734.21	0.560446	0.076652	7.31157	2.64045e-13	9.17248e-12
Tudor-SN	6052.46	0.560003	0.156054	3.58853	0.000332549	0.00177873
CG17068	1285.96	0.5594	0.084539	6.61707	3.66398e-11	9.54606e-10
CG11811	912.285	0.558554	0.0960705	5.814	6.09984e-09	1.05185e-07
CG33230	328.352	0.55815	0.124082	4.49825	6.85146e-06	5.89737e-05
Synj	1505.07	0.558139	0.125908	4.4329	9.29732e-06	7.71486e-05
tipE	3.00072	0.556966	0.376546	1.47914	0.139102	0.254421
Vm26Aa	7845.61	0.556849	0.199963	2.78476	0.00535678	0.0188612
Ndc1	545.841	0.556043	0.110201	5.0457	4.51874e-07	5.19521e-06
Cul5	1534.1	0.556025	0.102801	5.40875	6.3467e-08	8.76242e-07
cN-IIIB	294.086	0.556021	0.142853	3.89225	9.93208e-05	0.000619844
emb	5789.82	0.555487	0.0792126	7.01261	2.33914e-12	7.19714e-11
CG3792	362.153	0.555126	0.231618	2.39673	0.0165421	0.0481605
CG7744	2868.95	0.554456	0.116949	4.74101	2.12651e-06	2.08816e-05
Lpt	1059.46	0.554312	0.129867	4.2683	1.96967e-05	0.000149961
CG3168	1391.69	0.554049	0.107711	5.14384	2.69173e-07	3.24885e-06
PCB	2467.46	0.553513	0.114303	4.84251	1.28206e-06	1.32471e-05
Arfip	904.516	0.553494	0.0886857	6.24107	4.34585e-10	9.35999e-09
CG5734	1771.41	0.553177	0.0890987	6.20859	5.34631e-10	1.13136e-08
CG9799	1550.53	0.552393	0.0765443	7.21664	5.3288e-13	1.76269e-11
Mcr	5484.14	0.5523	0.0540659	10.2153	1.6933e-24	1.84399e-22
asRNA:CR44996	2.8512	0.552042	0.370133	1.49147	0.135838	0.250412
bchs	647.135	0.551643	0.22001	2.50736	0.0121638	0.0374853
Spn75F	2.39116	0.550918	0.374559	1.47085	0.141333	0.257869
Faf2	937.72	0.550836	0.156884	3.51111	0.000446238	0.00229806
msps	8544.85	0.550742	0.113468	4.85373	1.21161e-06	1.25862e-05
pcx	3888.3	0.550278	0.125565	4.38241	1.17373e-05	9.4877e-05
Hira	1581.68	0.550263	0.0928447	5.9267	3.09085e-09	5.64153e-08
beta'COP	2213.55	0.548885	0.115731	4.74276	2.10821e-06	2.07862e-05
Cyp9f2	123.61	0.548378	0.271175	2.02223	0.0431527	0.103243
CG8184	10978.7	0.547835	0.171253	3.19898	0.00137914	0.00606473
Upf2	1372.39	0.5477	0.0987608	5.54572	2.92741e-08	4.38523e-07
CG1371	2153.2	0.5467	0.110311	4.95599	7.19625e-07	7.86314e-06
Tango10	1622.46	0.54669	0.108213	5.05198	4.37247e-07	5.045e-06
Ilp6	33.9301	0.545998	0.323231	1.68919	0.0911837	0.185273
DMAP1	506.181	0.544754	0.158086	3.44594	0.000569083	0.00281212
SdhA	2165.15	0.544735	0.0844877	6.4475	1.13707e-10	2.73462e-09
Pde11	3283.49	0.543963	0.102418	5.31119	1.08909e-07	1.43222e-06
CG3702	1840.65	0.543568	0.102533	5.30139	1.14924e-07	1.50519e-06
Cbl	2325.34	0.543271	0.125706	4.32176	1.54788e-05	0.000121572
CG8064	700.523	0.543189	0.120372	4.51258	6.40437e-06	5.56193e-05
CG11210	1731.12	0.543001	0.074738	7.26539	3.7197e-13	1.26496e-11
CG9304	925.61	0.542732	0.110191	4.92535	8.42087e-07	9.07843e-06
faf	9658.26	0.542636	0.11969	4.53366	5.79694e-06	5.0985e-05
CG14407	517.252	0.541605	0.119375	4.53701	5.7057e-06	5.02724e-05
Oga	1309.82	0.541481	0.0889671	6.0863	1.15548e-09	2.29017e-08
Dec1	14136.7	0.541419	0.186884	2.89708	0.00376648	0.0140511
CG8613	691.441	0.540908	0.111751	4.84031	1.29638e-06	1.33807e-05
olf186-M	1168.72	0.540713	0.106126	5.09502	3.48697e-07	4.12646e-06
CG6420	1595.35	0.540463	0.0829581	6.5149	7.27404e-11	1.81701e-09
CG10337	47.3923	0.5401	0.324575	1.66402	0.0961077	0.193132
VhaAC39-1	3280.33	0.540034	0.0672075	8.03533	9.3328e-16	4.39095e-14
CG11737	857.043	0.539353	0.095015	5.67651	1.37473e-08	2.2096e-07
CG6488	166.29	0.538487	0.172951	3.11353	0.00184867	0.00772629
brun	2507.54	0.538279	0.122944	4.37824	1.1964e-05	9.62281e-05
sit	7.82278	0.537857	0.412295	1.30454	0.192049	0.32388
Naam	135.716	0.537283	0.244814	2.19466	0.0281882	0.0740179
mtDNA-helicase	822.49	0.537104	0.0972046	5.52551	3.28538e-08	4.86386e-07
sol	3408.46	0.537038	0.0842185	6.37672	1.80919e-10	4.14531e-09
CG17565	415.061	0.536788	0.116205	4.6193	3.85031e-06	3.51055e-05
SERCA	4309.52	0.535276	0.183764	2.91285	0.00358147	0.0135117
Idgf6	2087.49	0.535189	0.0797861	6.7078	1.97584e-11	5.29001e-10
pigeon	1581.37	0.534817	0.0835435	6.40166	1.53696e-10	3.57223e-09
CG7987	4552.7	0.534284	0.102693	5.20272	1.96388e-07	2.44338e-06
CG7457	2442.98	0.534245	0.075488	7.07721	1.47081e-12	4.62828e-11
CG32086	2.91093	0.534209	0.377536	1.41499	0.157072	0.278664
CG17732	4.95071	0.533941	0.398462	1.34001	0.180244	0.308643
CG6144	563.213	0.533721	0.10592	5.0389	4.68204e-07	5.35744e-06
CG6495	5.86669	0.53242	0.408594	1.30305	0.192556	0.324566
Hmt-1	2470.59	0.532369	0.0805721	6.60736	3.91229e-11	1.00846e-09
CG8191	207.186	0.532304	0.160616	3.31414	0.000919243	0.00426282
garz	2435.01	0.53207	0.0989723	5.37595	7.61798e-08	1.02689e-06
dor	592.11	0.531941	0.128136	4.15138	3.30477e-05	0.000236732
CG34401	5210.58	0.531888	0.12882	4.12893	3.64463e-05	0.000255732
Apc2	1975.3	0.531255	0.0895178	5.93463	2.94512e-09	5.42459e-08
CG12099	1904.06	0.531244	0.11776	4.51125	6.44474e-06	5.58697e-05
CG7536	1513.06	0.529775	0.119618	4.42889	9.47209e-06	7.85316e-05
GlnRS	1948.27	0.529332	0.0833805	6.34839	2.17575e-10	4.91547e-09
eEF1alpha1	72822.3	0.529309	0.0455155	11.6292	2.92788e-31	5.15946e-29
SREBP	3653.86	0.528836	0.113473	4.66045	3.15512e-06	2.94884e-05
Ork1	2826.58	0.528431	0.106646	4.95498	7.23368e-07	7.88626e-06
CG30377	1751.53	0.528325	0.107683	4.90631	9.28059e-07	9.94994e-06
CG1103	813.562	0.528266	0.116754	4.52461	6.05063e-06	5.28789e-05
mus304	825.824	0.527223	0.12614	4.17965	2.91957e-05	0.000211958
CG18549	1118.23	0.526346	0.0777162	6.77267	1.26427e-11	3.46139e-10
CG2617	329.297	0.526235	0.129226	4.07221	4.65682e-05	0.000318268
RpIIIC160	1401.94	0.525533	0.119336	4.40379	1.06376e-05	8.70035e-05
O-fut2	941.334	0.525202	0.0871864	6.0239	1.70259e-09	3.29372e-08
Tmem18	110.608	0.525024	0.247766	2.11903	0.0340878	0.0856792
Papss	539.759	0.524468	0.104108	5.03774	4.71061e-07	5.37753e-06
Tl	10374.1	0.524361	0.0625562	8.38223	5.1933e-17	3.05051e-15
Vps51	433.212	0.52411	0.126221	4.15233	3.29103e-05	0.000235922
NELF-B	910.918	0.523057	0.0953001	5.48853	4.05291e-08	5.8628e-07
Uggt	1916.72	0.522218	0.0961393	5.43189	5.57612e-08	7.78728e-07
CG9302	1015.28	0.52217	0.0980031	5.3281	9.92466e-08	1.31228e-06
CG6638	507.504	0.522103	0.112268	4.6505	3.31138e-06	3.07413e-05
Drp1	1497.32	0.521361	0.115353	4.51969	6.19291e-06	5.40249e-05
Non1	4103.97	0.521117	0.0760286	6.85422	7.17045e-12	2.044e-10
fliI	2065.61	0.52033	0.127705	4.07446	4.61216e-05	0.000315685
Esp	308.042	0.519816	0.153753	3.38084	0.000722637	0.00346379
ATPCL	4601.88	0.519481	0.0806028	6.44495	1.15638e-10	2.77417e-09
GABPI	487.6	0.51897	0.118498	4.37958	1.18907e-05	9.58703e-05
dlt	1093.28	0.518152	0.0856253	6.05139	1.436e-09	2.806e-08
Grip163	738.57	0.517411	0.115701	4.47195	7.75088e-06	6.58961e-05
l(3)04053	1328.07	0.517126	0.0986742	5.24074	1.59931e-07	2.03152e-06
Sec23	2238.06	0.516833	0.10901	4.74115	2.12509e-06	2.08816e-05
Gapvd1	2693.72	0.516588	0.0911777	5.66573	1.46399e-08	2.32988e-07
CG4615	857.394	0.515653	0.0978916	5.2676	1.38222e-07	1.77436e-06
Nrd1	1609.67	0.515077	0.110077	4.67923	2.87959e-06	2.72816e-05
stc	3446.04	0.515051	0.120922	4.25937	2.05e-05	0.000154619
CG1234	1126.72	0.514998	0.103643	4.96897	6.73106e-07	7.3798e-06
goe	600.67	0.51482	0.114687	4.48893	7.15828e-06	6.12881e-05
CG7044	796.82	0.513625	0.0929969	5.52304	3.33185e-08	4.91544e-07
Prosbeta6	2743.49	0.513533	0.0890196	5.76877	7.98534e-09	1.34364e-07
Mat89Ba	1600.81	0.513401	0.087804	5.84713	5.00131e-09	8.7654e-08
CG10254	14391.8	0.5134	0.0835299	6.1463	7.9311e-10	1.61488e-08
CG10413	2183.98	0.512765	0.0807111	6.35308	2.1104e-10	4.77896e-09
Hip14	2281.87	0.512523	0.102928	4.97946	6.37633e-07	7.03065e-06
CG7341	176.972	0.510583	0.184894	2.76149	0.0057539	0.0200745
twf	832.229	0.510495	0.0898597	5.68102	1.3389e-08	2.15559e-07
dsd	3672.15	0.509437	0.0515955	9.87367	5.41442e-23	5.21568e-21
Aven	109.244	0.509149	0.241625	2.10719	0.0351013	0.0879301
Pisd	1555.48	0.509072	0.0781924	6.51051	7.48963e-11	1.86605e-09
CG31688	1020.25	0.508869	0.0953411	5.33735	9.43143e-08	1.2539e-06
oxt	1912.94	0.508082	0.109595	4.63602	3.55185e-06	3.26918e-05
Cap-D3	755.219	0.508082	0.0969984	5.23804	1.62287e-07	2.05875e-06
Rbcn-3A	9320.67	0.506899	0.110516	4.58665	4.50405e-06	4.04947e-05
CG8243	1418.03	0.50607	0.121133	4.1778	2.94337e-05	0.000213208
Orc5	701.215	0.50566	0.114037	4.43418	9.24221e-06	7.68229e-05
CG31368	1066.97	0.505614	0.108855	4.64486	3.40301e-06	3.14413e-05
Smyd4-4	1427.91	0.505168	0.0889208	5.6811	1.3383e-08	2.15559e-07
Ptpmeg	3610.09	0.50468	0.0506184	9.97027	2.05669e-23	2.03403e-21
Cpes	1876.64	0.504333	0.0656827	7.67832	1.61193e-14	6.42914e-13
CG10505	2.90118	0.504157	0.382531	1.31795	0.187521	0.318425
CG1317	1359.87	0.504106	0.0790818	6.37449	1.83574e-10	4.19623e-09
Bem46	466.626	0.503432	0.147791	3.40637	0.000658326	0.00320465
CG32436	15.2418	0.503083	0.388346	1.29545	0.195165	0.327855
CG10898	342.379	0.502437	0.158411	3.17173	0.00151534	0.00655783
CG17807	262.837	0.502276	0.157035	3.1985	0.00138144	0.00606931
Gp210	5516.98	0.501734	0.0561496	8.93565	4.04782e-19	2.92772e-17
CG1671	901.363	0.501344	0.127845	3.92149	8.80024e-05	0.000557464
Alg1	1050.59	0.501172	0.0900894	5.56305	2.65105e-08	4.00218e-07
tamo	1154.78	0.500398	0.164609	3.03991	0.00236651	0.00950526
CG4709	272.06	0.500161	0.213024	2.34791	0.0188789	0.053611
RunxA	2.39569	0.499787	0.363585	1.37461	0.169253	0.294348
l(3)mbt	2372.16	0.499169	0.122305	4.08135	4.4775e-05	0.00030821
Fbw5	418.445	0.498331	0.116502	4.27743	1.8906e-05	0.000144737
CG11899	416.743	0.498227	0.187046	2.66365	0.00772971	0.0257268
CG16903	929.297	0.498061	0.0841732	5.9171	3.27676e-09	5.96962e-08
tam	1390.14	0.497451	0.0794544	6.26084	3.82902e-10	8.32081e-09
CG13397	1308.63	0.496978	0.116054	4.28229	1.84977e-05	0.00014206
psd	847.064	0.496719	0.259996	1.91049	0.0560704	0.126971
Nf1	2149.08	0.496681	0.193157	2.57139	0.0101291	0.0320821
CG5087	1212	0.496119	0.0872776	5.68437	1.31293e-08	2.12436e-07
CG9213	457.551	0.496076	0.120862	4.10449	4.05207e-05	0.000281524
Oatp30B	2919.03	0.495819	0.0742852	6.67453	2.48023e-11	6.58731e-10
MME1	135.937	0.495072	0.187236	2.6441	0.00819074	0.0269374
CG42674	1591.9	0.494636	0.141762	3.4892	0.000484474	0.00245764
CG10038	255.082	0.494047	0.141216	3.49853	0.000467823	0.00239143
CG12159	639.078	0.493626	0.126442	3.90397	9.4628e-05	0.000595156
FucT6	980.216	0.49312	0.108426	4.54797	5.41664e-06	4.79434e-05
CG9114	486.775	0.493033	0.104615	4.71285	2.44273e-06	2.35806e-05
Br140	2808.14	0.492702	0.124399	3.96065	7.47469e-05	0.000482322
fdl	1775.87	0.492258	0.102995	4.77943	1.75793e-06	1.77478e-05
CG11771	1571.07	0.492073	0.0785456	6.2648	3.73308e-10	8.14887e-09
CG4998	1.52851	0.492011	0.338238	1.45463	0.145772	0.263635
CG12010	485.542	0.491973	0.131307	3.74673	0.000179153	0.00103725
DAAM	2304.32	0.491824	0.13315	3.69375	0.000220967	0.00124512
Hacl	1270.85	0.491726	0.143527	3.42602	0.000612504	0.00301493
Yp2	23627.7	0.491672	0.190782	2.57714	0.00996228	0.0316676
CG7492	1367.37	0.49166	0.134605	3.65263	0.00025957	0.00143022
CG11593	1457.92	0.491646	0.0908097	5.41403	6.16224e-08	8.51989e-07
Fancd2	1620.84	0.491358	0.074618	6.58498	4.54956e-11	1.16344e-09
rig	2566.16	0.490764	0.127728	3.84225	0.00012191	0.000742645
MetRS-m	396.296	0.490678	0.114116	4.29982	1.70938e-05	0.000132539
CG8841	1919.69	0.490317	0.0815539	6.01218	1.83045e-09	3.50607e-08
Vha100-2	5121.24	0.490219	0.0777781	6.30279	2.92337e-10	6.55864e-09
CG6565	1164.3	0.489932	0.0960952	5.0984	3.42542e-07	4.06354e-06
Atg9	1029.08	0.489594	0.139088	3.52002	0.000431511	0.00222813
Ulp1	4648.09	0.488657	0.125603	3.89048	0.000100048	0.000623981
Ost48	532.88	0.4885	0.141399	3.45477	0.000550763	0.00273603
mRpL23	342.001	0.487866	0.16599	2.93914	0.00329126	0.0125784
pn	449.193	0.487376	0.118198	4.1234	3.73329e-05	0.000260685
NTPase	1239.64	0.487228	0.116485	4.18274	2.88013e-05	0.000209724
frtz	823.051	0.486864	0.112615	4.32325	1.5375e-05	0.000120954
zfh1	877.902	0.486787	0.187138	2.60121	0.00928946	0.0298618
CG5521	3403.49	0.486502	0.0899997	5.4056	6.45926e-08	8.89249e-07
CG5989	589.919	0.486501	0.114669	4.24268	2.2087e-05	0.000165176
CG42233	211.283	0.486134	0.187825	2.58823	0.00964716	0.0308073
CG9839	255.699	0.486058	0.145273	3.34583	0.000820375	0.00386349
HPS1	194.545	0.48563	0.16979	2.86018	0.00423398	0.015491
CG31643	702.059	0.4856	0.0997456	4.86838	1.12518e-06	1.1815e-05
l(3)76BDm	1278.03	0.485537	0.0864621	5.6156	1.95882e-08	3.00394e-07
CG8202	975.563	0.485139	0.101281	4.79002	1.66768e-06	1.69248e-05
Srp9	836.79	0.485119	0.0924717	5.24614	1.55322e-07	1.98076e-06
CG34120	515.756	0.485115	0.114083	4.25229	2.11593e-05	0.000158974
lncRNA:CR45640	1.59636	0.48501	0.351082	1.38147	0.167134	0.291656
FucTC	2.60593	0.48454	0.379335	1.27734	0.201482	0.3357
CG12702	615.875	0.484452	0.118713	4.08087	4.48679e-05	0.00030863
kel	1709.66	0.483906	0.0782864	6.18123	6.36058e-10	1.32574e-08
Smyd3	480.352	0.483841	0.117156	4.12989	3.62939e-05	0.000254899
CSN3	829.626	0.483682	0.0870973	5.55335	2.8025e-08	4.21113e-07
CG42271	1138.97	0.482977	0.0961396	5.0237	5.06852e-07	5.7321e-06
Pex11	714.222	0.482746	0.119021	4.05597	4.99259e-05	0.000336965
Atxn7	926.996	0.48264	0.0950511	5.07769	3.82051e-07	4.46125e-06
CG8389	337.613	0.482079	0.158101	3.04919	0.0022946	0.00927021
CrebA	470.307	0.481583	0.150552	3.19879	0.00138004	0.00606592
ATP6AP2	1571.52	0.481502	0.0805988	5.97406	2.31425e-09	4.32172e-08
Vps33B	370.525	0.481249	0.155975	3.08542	0.00203266	0.00836896
dnk	2141.53	0.481234	0.0840374	5.72643	1.02567e-08	1.70511e-07
alpha-Man-IIa	1891.37	0.481095	0.0944988	5.09102	3.56148e-07	4.19415e-06
l(2)09851	1498.78	0.480993	0.0920727	5.22405	1.7505e-07	2.20623e-06
CG6962	894.266	0.480807	0.0907787	5.29647	1.18061e-07	1.54419e-06
f	19.6499	0.480681	0.402085	1.19547	0.231903	0.371325
Sccpdh1	1304.46	0.480095	0.084992	5.64871	1.61653e-08	2.55501e-07
capu	714.997	0.480004	0.145129	3.30742	0.00094159	0.00435603
CG11696	838.567	0.479447	0.0980133	4.89165	9.99955e-07	1.06501e-05
CG5916	990.856	0.478771	0.0936794	5.11074	3.20902e-07	3.82556e-06
RpS4	21471.4	0.477985	0.0993963	4.80888	1.51778e-06	1.54521e-05
disp	2042.71	0.477237	0.0793736	6.01255	1.82632e-09	3.50509e-08
trr	2538.48	0.477154	0.124572	3.83036	0.000127958	0.000775106
CG11426	11.2722	0.476919	0.414542	1.15047	0.249949	0.391612
CG5535	829.995	0.476772	0.112093	4.25335	2.10592e-05	0.000158344
Plekhm1	526.281	0.476729	0.127573	3.7369	0.000186299	0.00107413
skd	10135.5	0.476669	0.0886178	5.37893	7.49296e-08	1.01145e-06
CG4557	606.868	0.476371	0.162121	2.93837	0.00329943	0.012604
Rif1	4205.2	0.476174	0.122083	3.90042	9.60243e-05	0.000602374
CG13933	1140.52	0.476053	0.0807623	5.8945	3.75817e-09	6.74522e-08
CG3700	302.391	0.475932	0.148425	3.20654	0.0013434	0.00592706
CG5466	497.742	0.475561	0.105294	4.51652	6.28636e-06	5.46924e-05
pds5	2699.97	0.475556	0.0925613	5.13775	2.78054e-07	3.34355e-06
Rassf	2012.48	0.475516	0.0910738	5.22122	1.77747e-07	2.2344e-06
mino	3828.21	0.475437	0.0678543	7.00674	2.4393e-12	7.45796e-11
Edem2	1215.01	0.475343	0.100099	4.74873	2.04698e-06	2.02649e-05
CG1774	489.36	0.474605	0.120789	3.92919	8.5232e-05	0.000541684
S6kII	1112.92	0.474442	0.0971866	4.88177	1.05139e-06	1.11489e-05
hob	2987.42	0.47397	0.076253	6.21575	5.10796e-10	1.08329e-08
CG3036	1023.6	0.473641	0.0942031	5.02787	4.95968e-07	5.63532e-06
mthl1	1640.3	0.470741	0.0906762	5.19145	2.08658e-07	2.58607e-06
Phf7	1288.74	0.47044	0.108415	4.33927	1.42959e-05	0.000113199
CG8611	1177.3	0.470078	0.0997612	4.71203	2.45259e-06	2.36523e-05
CG2846	309.538	0.469769	0.159493	2.94539	0.00322545	0.0123757
CG7255	794.077	0.46954	0.109572	4.28523	1.82547e-05	0.000140305
tefu	1729.35	0.469065	0.220418	2.12807	0.0333312	0.0841705
Top3beta	1832.57	0.468593	0.0803009	5.83547	5.36405e-09	9.35043e-08
armi	4050.85	0.468488	0.0623947	7.50846	5.98248e-14	2.25612e-12
CG14881	204.396	0.467725	0.161774	2.89122	0.00383751	0.0142612
CG12772	787.798	0.466983	0.111986	4.17002	3.0457e-05	0.000220126
CG8027	376.901	0.466975	0.136876	3.41166	0.000645694	0.00315109
Spt6	6276.72	0.466852	0.107661	4.33632	1.44886e-05	0.000114538
CG4825	1518.36	0.466514	0.0855713	5.45176	4.98737e-08	7.0669e-07
CG4325	13.4855	0.466413	0.393658	1.18482	0.23609	0.375836
CG1486	1306.52	0.466282	0.0863068	5.40261	6.56788e-08	9.00366e-07
CG8915	1455.04	0.465823	0.0821805	5.66829	1.4423e-08	2.29914e-07
CG9008	110.41	0.465543	0.221306	2.10361	0.0354122	0.0884119
PEK	4754.07	0.465531	0.0852709	5.45944	4.77639e-08	6.7878e-07
yl	30218.8	0.465238	0.0860356	5.40751	6.39081e-08	8.81078e-07
CG5776	2081.68	0.465195	0.122845	3.78684	0.000152575	0.00090278
bora	963.002	0.464999	0.126006	3.69029	0.000224003	0.00125857
GAA1	1060.07	0.464372	0.0886621	5.23755	1.62724e-07	2.0616e-06
png	785.4	0.464177	0.103182	4.49862	6.83945e-06	5.89226e-05
Sec63	1639.63	0.464164	0.0911637	5.09154	3.55164e-07	4.18765e-06
msk	12920.8	0.463497	0.0556356	8.33095	8.01949e-17	4.51889e-15
CG8206	493.248	0.46293	0.133271	3.4736	0.000513519	0.00258144
CG30010	71.319	0.462046	0.265958	1.73729	0.0823363	0.171614
Magi	1440.44	0.461809	0.0742194	6.22221	4.90193e-10	1.04417e-08
tty	16.1829	0.461758	0.37676	1.2256	0.220348	0.358099
swi2	27.5548	0.461726	0.351826	1.31237	0.189395	0.320799
Sc2	671.63	0.460997	0.109402	4.2138	2.51114e-05	0.000185362
asRNA:CR43824	1.53847	0.460455	0.339628	1.35576	0.175175	0.302638
CG11700	107.925	0.460408	0.216883	2.12284	0.0337675	0.0850064
Hel89B	2901.33	0.460297	0.104424	4.40795	1.04356e-05	8.54957e-05
l(2)37Cb	489.363	0.46017	0.128653	3.57681	0.000347807	0.00184912
IntS8	575.007	0.459627	0.130407	3.52456	0.000424193	0.00219577
RhoGEF4	407.138	0.459449	0.137484	3.34183	0.000832289	0.003912
mia	22.2483	0.458989	0.367466	1.24906	0.211642	0.348612
CG43367	2858.81	0.458931	0.112855	4.06656	4.7713e-05	0.000324516
CG3679	2871.32	0.458616	0.115117	3.9839	6.77921e-05	0.000442154
ZnT86D	626.616	0.458282	0.102232	4.48278	7.36778e-06	6.28596e-05
D2hgdh	58.5238	0.458262	0.30514	1.50181	0.133147	0.246889
e	6.98815	0.457984	0.406744	1.12598	0.260176	0.402686
CG11498	3.44839	0.457705	0.389804	1.17419	0.240317	0.380706
Atac2	428.948	0.457627	0.134118	3.41213	0.000644585	0.00314885
stx	4979.55	0.45758	0.130724	3.50035	0.000464649	0.00237896
PNPase	677.607	0.457473	0.10096	4.53124	5.8638e-06	5.15249e-05
Poc1	569.981	0.456969	0.112703	4.05462	5.02164e-05	0.00033869
NAT1	15216.9	0.45675	0.107287	4.25727	2.06942e-05	0.000155821
E(var)3-9	1886.83	0.454861	0.101353	4.48791	7.19263e-06	6.14735e-05
CG42684	3759.64	0.454741	0.125489	3.62374	0.000290373	0.00157223
CG8301	773.277	0.454371	0.125787	3.61223	0.000303573	0.00163639
GstD3	612.181	0.454343	0.140653	3.23024	0.00123687	0.00553963
Ada1-2	117.491	0.454341	0.248471	1.82855	0.0674676	0.146811
CG15484	14.9276	0.454119	0.386884	1.17378	0.240481	0.380903
CG30109	301.852	0.454062	0.139481	3.25537	0.00113243	0.00513836
E(z)	966.609	0.453933	0.121556	3.73434	0.000188205	0.00108383
Gdh	1189.37	0.45321	0.174333	2.59968	0.00933112	0.0299858
htt	1949.76	0.453117	0.189369	2.39278	0.0167214	0.0485802
CG8303	1430.61	0.453063	0.195388	2.31879	0.0204065	0.057071
nmdyn-D6	194.36	0.452784	0.167435	2.70424	0.00684611	0.0232002
Pi3K59F	461.229	0.452444	0.129949	3.48171	0.000498223	0.00251499
Vha16-1	10619.8	0.451784	0.0759791	5.94617	2.74497e-09	5.07716e-08
CG7148	240.28	0.451744	0.198786	2.27252	0.0230554	0.062909
bgcn	10.5919	0.451551	0.410242	1.10069	0.27103	0.415176
Chi	1568.83	0.451456	0.0723043	6.24383	4.26982e-10	9.21673e-09
CG1792	220.638	0.451147	0.215544	2.09307	0.0363432	0.0900175
RhoBTB	3655.75	0.451094	0.0856871	5.26443	1.40622e-07	1.80041e-06
Psa	1616.54	0.450892	0.117039	3.85249	0.000116921	0.000714501
CG4562	1124.07	0.45042	0.152399	2.95553	0.00312128	0.0120236
eEF1gamma	11687.9	0.450193	0.0543712	8.27999	1.23186e-16	6.66995e-15
Fur2	6222.08	0.450157	0.0799633	5.62955	1.80681e-08	2.80186e-07
betaTub60D	1060.51	0.449784	0.198228	2.26902	0.0232668	0.0633255
Alg2	266.048	0.449673	0.179385	2.50674	0.012185	0.0375269
Oseg4	79.3507	0.449339	0.217538	2.06557	0.0388695	0.0950362
CG1074	1148.1	0.448302	0.0779934	5.74795	9.03325e-09	1.50949e-07
melt	61.8664	0.448065	0.280197	1.59911	0.109796	0.212702
CG9062	1579.78	0.447694	0.094912	4.71693	2.39427e-06	2.31821e-05
aux	1972.98	0.447244	0.0951792	4.69897	2.61479e-06	2.5042e-05
CG2003	160.511	0.447189	0.20394	2.19275	0.0283254	0.0742786
PMP34	610.995	0.446645	0.129749	3.44238	0.000576614	0.00284404
PIG-B	2211.22	0.446473	0.110764	4.03085	5.55762e-05	0.00036944
ksr	1483.29	0.445853	0.0756138	5.89645	3.71402e-09	6.67834e-08
bdg	1223.02	0.444874	0.0891025	4.99283	5.95014e-07	6.62099e-06
path	5903.5	0.444793	0.0975427	4.55998	5.11588e-06	4.54891e-05
CG4666	46.1772	0.444709	0.30446	1.46065	0.144113	0.26166
CG15914	140.441	0.444548	0.18793	2.3655	0.0180056	0.051615
Cht11	257.156	0.444504	0.148533	2.99263	0.00276585	0.0108222
Idh	4521.37	0.44342	0.0671923	6.59927	4.13183e-11	1.05941e-09
CG10347	467.201	0.443312	0.125568	3.53044	0.000414868	0.00215414
CG18528	333.982	0.443205	0.120419	3.68054	0.000232745	0.00130391
MTPAP	577.636	0.44291	0.109705	4.03728	5.40739e-05	0.000360691
Slc45-1	109.417	0.442808	0.215352	2.05621	0.0397625	0.0967722
spo	122.39	0.441948	0.24964	1.77034	0.0766703	0.162459
CG11596	1082.06	0.441825	0.0838955	5.26637	1.39148e-07	1.78389e-06
CG32537	331.852	0.441462	0.140309	3.14636	0.00165318	0.00705531
Sym	1361.33	0.44139	0.0951567	4.63856	3.50847e-06	3.2354e-05
ru	2.63374	0.441188	0.383695	1.14984	0.250209	0.391892
ImpL2	487.025	0.440777	0.151691	2.90576	0.00366361	0.0137787
Ino80	1251.43	0.440396	0.121436	3.62655	0.000287229	0.00156044
Usp16-45	4059.84	0.440393	0.121389	3.62796	0.000285666	0.00155369
Fatp2	6.1568	0.440321	0.40861	1.07761	0.281208	0.426588
CG14657	595.801	0.439884	0.118708	3.70561	0.000210882	0.00119595
CG7530	3190.33	0.439713	0.0566002	7.76876	7.92583e-15	3.29336e-13
CG16790	161.002	0.439613	0.186993	2.35096	0.0187249	0.053224
Gart	2003.16	0.439478	0.0803137	5.47202	4.44924e-08	6.379e-07
CG33774	117.414	0.439169	0.215748	2.03557	0.041794	0.100763
l(2)k01209	1195.88	0.438662	0.110991	3.95223	7.74276e-05	0.000497301
vih	1522.24	0.438537	0.151207	2.90025	0.0037287	0.0139535
asRNA:CR44053	21.1546	0.438363	0.381809	1.14812	0.250918	0.392685
CG6758	591.374	0.438202	0.11965	3.66237	0.000249895	0.00138513
CG7791	444.639	0.437893	0.108688	4.0289	5.60377e-05	0.000372253
GlcAT-S	838.54	0.437843	0.0940143	4.65719	3.20555e-06	2.98445e-05
Ac13E	311.663	0.437777	0.207663	2.10811	0.0350212	0.0877521
CG12320	136.627	0.437443	0.209744	2.08561	0.037014	0.0913289
Baldspot	1521.72	0.437111	0.0919032	4.75621	1.97263e-06	1.95688e-05
colt	1047.44	0.436331	0.105336	4.14229	3.43849e-05	0.000244068
CG14450	338.54	0.436138	0.201365	2.16591	0.0303183	0.0783168
CG33977	53.5605	0.436103	0.287142	1.51877	0.12882	0.240702
Pfrx	668.132	0.436077	0.148515	2.93624	0.00332221	0.0126618
Alg9	1021.91	0.435379	0.093663	4.64836	3.34585e-06	3.10315e-05
CG8001	693.759	0.435141	0.119598	3.63838	0.000274359	0.00149892
ssh	3474.18	0.43514	0.126772	3.43245	0.000598152	0.00294728
CG12659	297.256	0.435029	0.14831	2.93323	0.00335455	0.0127649
CG4751	703.119	0.434992	0.129661	3.35484	0.000794122	0.00375445
CG15111	720.412	0.434911	0.135234	3.21598	0.0013	0.00577699
spri	3646.15	0.434663	0.125124	3.47386	0.000513024	0.0025803
CG11906	697.344	0.434236	0.0988506	4.39285	1.11875e-05	9.08827e-05
HBS1	572.342	0.434109	0.0998166	4.34907	1.36717e-05	0.0001087
not	1162.2	0.43396	0.0911937	4.75866	1.94884e-06	1.93725e-05
CG4797	32.5048	0.433761	0.311059	1.39447	0.163177	0.286248
Agpat3	552.352	0.433627	0.155211	2.7938	0.00520927	0.0184533
fsd	171.101	0.433265	0.231246	1.87361	0.0609842	0.135307
CG9427	19.1062	0.432867	0.382708	1.13106	0.258029	0.400482
l(3)02640	4521.45	0.432822	0.0611249	7.08095	1.43174e-12	4.52e-11
MFS12	216.649	0.432817	0.211252	2.04881	0.0404803	0.0980488
Ranbp9	2887.86	0.432628	0.101493	4.26262	2.02043e-05	0.000152865
Nsun2	906.007	0.432132	0.0967676	4.46567	7.982e-06	6.76237e-05
CG7218	1356.63	0.431566	0.0758493	5.68977	1.27208e-08	2.0721e-07
gb	842.335	0.431563	0.0951908	4.53366	5.7971e-06	5.0985e-05
EMRE	482.206	0.431423	0.124281	3.47135	0.000517851	0.00259818
aralar1	1158.76	0.430504	0.0765119	5.62663	1.83762e-08	2.83858e-07
Cht10	265.36	0.430439	0.162634	2.64668	0.0081286	0.0268118
CG42542	1202.55	0.429894	0.140078	3.06896	0.00214802	0.00877312
lama	2015.48	0.42982	0.103702	4.14476	3.40167e-05	0.000242598
CG15760	2.65854	0.429655	0.363301	1.18264	0.236951	0.376665
ValRS	1747.19	0.42933	0.119849	3.58226	0.000340631	0.00181695
Nct	1933.56	0.42921	0.0891132	4.81646	1.46126e-06	1.49236e-05
eIF2Bepsilon	1115.29	0.429049	0.10454	4.10416	4.05786e-05	0.000281725
POLDIP2	669.724	0.42897	0.120043	3.57346	0.000352294	0.0018699
mus205	1435.45	0.428027	0.104585	4.09264	4.26496e-05	0.000294836
Hydr2	1599.6	0.427302	0.0855012	4.99762	5.80436e-07	6.48109e-06
CG2712	237.891	0.42704	0.156361	2.73112	0.00631197	0.021732
Apc	3169.91	0.426272	0.124954	3.41143	0.000646233	0.00315213
Nprl3	821.869	0.425883	0.122459	3.47777	0.000505613	0.00254831
dbo	2047.91	0.425093	0.0892994	4.76031	1.93294e-06	1.92341e-05
RNaseZ	838.391	0.425023	0.0880331	4.82799	1.37921e-06	1.41603e-05
asRNA:CR44998	1.07032	0.424583	0.301825	1.40672	0.15951	NA
TppII	4074.96	0.42438	0.127706	3.32309	0.000890249	0.00414822
CG11127	240.872	0.424307	0.163248	2.59915	0.00934558	0.0300223
CG7565	1142.59	0.423309	0.0754756	5.60855	2.04029e-08	3.119e-07
Nup358	11943.3	0.423224	0.0951101	4.44984	8.59358e-06	7.21117e-05
CG8372	374.084	0.423169	0.124894	3.38824	0.000703427	0.00338679
CG13907	2953.36	0.42304	0.0607234	6.96667	3.24532e-12	9.74833e-11
hyd	11588.2	0.422987	0.0853944	4.95334	7.29512e-07	7.94219e-06
Lkb1	904.205	0.422806	0.149861	2.82131	0.00478274	0.0171874
rho-7	641.116	0.422765	0.105886	3.99263	6.53433e-05	0.000427389
Nrt	472.55	0.422468	0.142309	2.96868	0.00299084	0.011581
Pex10	295.138	0.422171	0.138136	3.0562	0.00224163	0.00910177
Etl1	1913.82	0.422073	0.077807	5.42461	5.80801e-08	8.05311e-07
CG6236	1041.29	0.422042	0.089471	4.71708	2.39249e-06	2.31821e-05
CG14882	810.56	0.421788	0.103699	4.06741	4.75385e-05	0.000323783
rtet	1144.15	0.421783	0.101734	4.14595	3.38407e-05	0.000241698
Orc1	3688.59	0.421622	0.137575	3.06466	0.00217916	0.00888376
CG14223	27.3526	0.421475	0.339379	1.2419	0.214273	0.352018
CG1636	1131.27	0.421346	0.111457	3.78033	0.00015662	0.00092277
CSN4	912.327	0.421226	0.0963234	4.37304	1.2253e-05	9.83081e-05
polo	6568.81	0.421112	0.0951363	4.4264	9.58173e-06	7.93728e-05
l(2)10685	170.626	0.420968	0.184145	2.28606	0.0222506	0.0612129
CG4991	5363.93	0.420386	0.0751489	5.59404	2.21848e-08	3.38074e-07
tth	1098.74	0.4203	0.0965536	4.35303	1.34271e-05	0.000106843
Nmt	2475.8	0.420188	0.0756255	5.55617	2.75753e-08	4.15e-07
Hlc	2002.45	0.419238	0.092179	4.54809	5.41349e-06	4.79434e-05
CG12333	597.022	0.418873	0.111058	3.77167	0.000162161	0.000952523
lncRNA:CR44830	9.77025	0.41863	0.405207	1.03313	0.301544	0.448653
CG1358	791.224	0.418498	0.0915447	4.57152	4.84209e-06	4.33329e-05
CG2493	225.513	0.418238	0.171039	2.44527	0.0144743	0.0432044
CG5522	1469.59	0.41807	0.0976608	4.28084	1.86188e-05	0.000142819
Usp39	756.418	0.418033	0.10947	3.81871	0.000134151	0.000809584
CG8963	1951.76	0.417438	0.0766602	5.44531	5.17159e-08	7.31723e-07
CG18635	3.65713	0.417414	0.392823	1.0626	0.287963	0.43432
CG4332	755.67	0.41662	0.113529	3.66973	0.000242809	0.00135092
Mettl14	425.339	0.416587	0.143456	2.90393	0.00368508	0.0138433
CalpB	1577.5	0.416555	0.0649882	6.4097	1.45809e-10	3.42174e-09
CG42255	21.8376	0.416387	0.396307	1.05067	0.29341	0.440002
AcCoAS	2834.17	0.416082	0.0881445	4.72046	2.35317e-06	2.28985e-05
LeuRS-m	1007.2	0.415945	0.10454	3.97882	6.92586e-05	0.000451112
Exd2	706.336	0.41569	0.113349	3.66735	0.000245078	0.00136276
CG9547	198.291	0.415661	0.168413	2.4681	0.0135831	0.04105
Hmu	2705	0.415241	0.0918861	4.51909	6.21074e-06	5.41317e-05
CG11034	376.47	0.415133	0.118747	3.49594	0.000472397	0.00240801
CG4592	281.412	0.41467	0.18552	2.23517	0.0254059	0.0681333
TBCD	966.845	0.414579	0.134217	3.08886	0.00200925	0.00828666
CG11601	302.889	0.41418	0.144648	2.86336	0.00419175	0.0153655
CG8195	742.483	0.414153	0.133061	3.11251	0.00185502	0.00774951
CG43366	8.11694	0.414024	0.412737	1.00312	0.315805	0.463195
CG12581	244.587	0.41354	0.167819	2.4642	0.0137318	0.0413705
CG43313	1787.69	0.41203	0.101021	4.07866	4.52966e-05	0.000311358
QC	1477.42	0.411873	0.0798114	5.16058	2.46189e-07	2.99756e-06
DNApol-epsilon255	2416.93	0.411691	0.0963687	4.27204	1.93691e-05	0.000147932
CycK	1307.28	0.411672	0.0707825	5.81601	6.02698e-09	1.04124e-07
CG2519	2476.8	0.411369	0.109285	3.76419	0.000167093	0.000975579
comt	111.364	0.411321	0.241502	1.70318	0.0885349	0.181797
APC7	2656.41	0.411255	0.0766405	5.36603	8.0489e-08	1.08347e-06
Sec8	1646.48	0.411106	0.0752772	5.46123	4.72856e-08	6.73958e-07
CG4199	1359.23	0.411103	0.0990572	4.15015	3.32253e-05	0.000237828
CG5026	1325.25	0.410448	0.0727856	5.63914	1.70906e-08	2.68029e-07
Hem	1764.98	0.410367	0.0968107	4.23886	2.24659e-05	0.000167621
CCT1	5002.71	0.410361	0.0994524	4.12621	3.68793e-05	0.000258262
Acox57D-p	1088.8	0.41019	0.0864751	4.74345	2.10109e-06	2.0737e-05
Nhe3	814.337	0.410105	0.118406	3.46356	0.000533085	0.00266048
mst	691.222	0.410019	0.102425	4.00313	6.25105e-05	0.000410747
CG8602	1769.06	0.409939	0.0856632	4.78547	1.70584e-06	1.72578e-05
Gem2	401.461	0.409814	0.1384	2.96108	0.00306562	0.0118469
lncRNA:CR45454	1.7498	0.409671	0.349203	1.17316	0.240732	0.381186
CG6951	118.634	0.409532	0.196792	2.08105	0.0374298	0.092167
Pka-C1	2147.19	0.409357	0.0873338	4.68727	2.7688e-06	2.63356e-05
CG4849	598.743	0.409284	0.129229	3.16712	0.00153959	0.00664071
crm	2181.61	0.408926	0.144714	2.82576	0.00471691	0.0169823
CG5880	312.526	0.408802	0.164495	2.4852	0.012948	0.0394876
CG14218	23.188	0.408364	0.351667	1.16122	0.24555	0.386657
p	1269.72	0.407546	0.0722997	5.63689	1.73145e-08	2.71059e-07
ArgRS	1254.35	0.407213	0.125821	3.23646	0.00121023	0.00544111
CG1427	378.484	0.407099	0.175434	2.32053	0.0203124	0.0569147
Pgant3	673.904	0.406957	0.0855581	4.7565	1.9698e-06	1.95607e-05
CG14767	1988.43	0.406734	0.0717535	5.66849	1.44065e-08	2.29914e-07
fry	3192.98	0.406343	0.213531	1.90297	0.0570444	0.12851
Cpr49Ae	3.59196	0.406241	0.376032	1.08034	0.279993	0.425277
cactin	305.38	0.405855	0.180773	2.24511	0.0247611	0.0667736
Sfxn1-3	457.168	0.405287	0.115811	3.49955	0.000466047	0.00238486
Arp3	894.355	0.404948	0.087623	4.62148	3.81006e-06	3.47713e-05
Pez	1066.76	0.404847	0.137511	2.9441	0.00323895	0.0124177
mlt	668.18	0.404826	0.145744	2.77765	0.00547538	0.0192204
wda	548.536	0.404765	0.119296	3.39294	0.000691459	0.00333912
CG4364	3445.91	0.404568	0.0720238	5.61714	1.9414e-08	2.98194e-07
senju	514.637	0.404396	0.105949	3.8169	0.000135137	0.00081452
CG7518	3274.75	0.404297	0.150793	2.68114	0.00733715	0.0245976
Rcd5	1094.59	0.404254	0.104229	3.8785	0.000105101	0.000650472
bin3	7027.82	0.404076	0.0861095	4.69258	2.69776e-06	2.57857e-05
CG12204	250.621	0.403982	0.169619	2.38171	0.0172325	0.0497521
egg	1158.6	0.403852	0.136632	2.95576	0.00311904	0.0120198
botv	796.555	0.402979	0.129929	3.10153	0.00192524	0.00799865
CG7546	2984.86	0.402771	0.0967654	4.16234	3.15e-05	0.000226482
sav	661.09	0.402508	0.0955561	4.21227	2.52819e-05	0.000186337
Arpc1	901.404	0.402223	0.112123	3.58734	0.000334067	0.00178488
CG12971	3.6662	0.401943	0.398639	1.00829	0.313315	0.460238
rols	92.7565	0.401759	0.25408	1.58123	0.113825	0.219099
CG10053	42.0538	0.401379	0.306395	1.31001	0.190194	0.321759
MFS15	554.898	0.40044	0.136732	2.92866	0.00340431	0.0129188
Ice1	2389.66	0.400258	0.098386	4.06824	4.73694e-05	0.000323086
fand	620.115	0.400248	0.109794	3.64543	0.000266944	0.00146319
YME1L	974.523	0.400043	0.106421	3.75906	0.000170554	0.000993395
lic	1067.12	0.399667	0.10854	3.6822	0.00023123	0.00129692
wge	3220.87	0.399659	0.155525	2.56974	0.0101774	0.0322245
CG7369	1172.46	0.39941	0.123213	3.24164	0.00118845	0.00536989
fs(1)Ya	4600.55	0.399241	0.0782021	5.10524	3.30377e-07	3.92885e-06
Crag	4588.08	0.399018	0.0588056	6.78537	1.15786e-11	3.20536e-10
AIF	2479.13	0.398985	0.106085	3.76098	0.00016925	0.000986391
stg	4239.49	0.398899	0.0943017	4.23003	2.33656e-05	0.000173932
CG17715	54.1224	0.398479	0.416945	0.95571	0.339219	0.487299
rt	943.917	0.398265	0.111294	3.57849	0.000345587	0.00183933
kri	599.556	0.397785	0.114744	3.46672	0.000526843	0.00263476
Gasz	989.296	0.397582	0.123047	3.23114	0.00123297	0.00552725
Uba4	633.445	0.397489	0.101316	3.92326	8.736e-05	0.000553957
PIG-C	211.973	0.397219	0.186918	2.1251	0.0335784	0.0845961
Marcal1	433.485	0.397172	0.14718	2.69855	0.00696424	0.0235265
CG5850	1199.62	0.396759	0.124736	3.18079	0.00146876	0.00638636
CG17230	208.029	0.39657	0.179822	2.20535	0.0274296	0.0723592
CG5854	657.851	0.396236	0.136967	2.89292	0.00381674	0.0142112
Psn	1078.19	0.395947	0.0886399	4.46692	7.93535e-06	6.72873e-05
CG1951	1584.24	0.395728	0.118718	3.33334	0.000858096	0.00402145
Pgi	2110.73	0.395715	0.0767933	5.15299	2.56367e-07	3.10978e-06
Vps15	951.723	0.395625	0.0894417	4.42327	9.72179e-06	8.04642e-05
alphaTub84D	1578.67	0.395608	0.0782283	5.05709	4.25692e-07	4.94109e-06
fal	1004.39	0.395337	0.0777324	5.08588	3.65935e-07	4.29896e-06
RhoGEF64C	319.643	0.395058	0.216209	1.82721	0.0676689	0.147128
sotv	590.166	0.394837	0.107026	3.68917	0.000224985	0.00126336
Atg2	2491.38	0.394695	0.108638	3.63311	0.000280025	0.00152643
Cdc7	2789.28	0.394359	0.103903	3.79546	0.000147371	0.000878191
Marf1	14408.6	0.393798	0.0643606	6.11862	9.43904e-10	1.89015e-08
CG1896	360.126	0.393559	0.16087	2.44645	0.0144273	0.0431039
DIP-epsilon	3.5476	0.393367	0.395746	0.993989	0.320228	0.468122
CG3842	500.443	0.393312	0.138516	2.83947	0.00451882	0.0164093
Acph-1	814.393	0.393283	0.0847943	4.63808	3.51657e-06	3.23979e-05
az2	486.33	0.393219	0.158473	2.4813	0.0130906	0.0398599
CG42747	83.5807	0.39299	0.255449	1.53843	0.123943	0.233935
E(Pc)	6423.72	0.392973	0.123674	3.17749	0.00148554	0.00645067
mats	1025.65	0.392963	0.0853385	4.60476	4.1294e-06	3.74739e-05
DNApol-alpha60	623.059	0.392956	0.0907198	4.33153	1.48076e-05	0.000116679
Elp1	1129.13	0.392914	0.104641	3.75487	0.00017343	0.00100652
CG1575	880.794	0.392813	0.1012	3.88157	0.000103783	0.000644783
CG11241	145.608	0.392647	0.236992	1.65679	0.097561	0.195001
sea	13.3106	0.392479	0.405307	0.96835	0.332869	0.481518
Ing3	544.805	0.392368	0.123816	3.16897	0.0015298	0.00660439
eIF3a	5753.51	0.39226	0.0860217	4.56001	5.11511e-06	4.54891e-05
Cln7	176.108	0.392196	0.320319	1.22439	0.220804	0.358165
AGBE	1884.96	0.392135	0.112609	3.48226	0.000497196	0.00251111
CG1523	658.903	0.391854	0.0973454	4.0254	5.6879e-05	0.000376295
BubR1	1818.54	0.391666	0.124692	3.14107	0.00168334	0.0071651
TBC1D16	87.565	0.39149	0.237212	1.65038	0.0988651	0.196837
Pi4KIIalpha	1173.17	0.39135	0.0963771	4.06061	4.8944e-05	0.000330799
cdm	2316.02	0.391043	0.0553777	7.06138	1.64862e-12	5.12129e-11
CG16865	139.21	0.390947	0.22296	1.75344	0.0795269	0.166979
CG7460	42.2582	0.390571	0.303682	1.28612	0.198402	0.331726
CG10702	855.119	0.390402	0.123185	3.16924	0.0015284	0.00660322
CG9426	1240.62	0.390239	0.0969092	4.02686	5.65276e-05	0.000374771
Rfx	444.283	0.390141	0.151485	2.57545	0.0100111	0.0318019
CG4679	509.349	0.390119	0.139916	2.78825	0.00529942	0.0187179
JMJD5	275.377	0.389833	0.141581	2.75342	0.00589753	0.0205091
Eps-15	2241.92	0.389606	0.092386	4.21716	2.47398e-05	0.000182758
CG8134	357.7	0.389388	0.137221	2.83768	0.00454434	0.0164834
ND-MLRQ	872.479	0.38934	0.134121	2.9029	0.00369725	0.0138676
dgt6	629.167	0.389313	0.107544	3.62002	0.000294579	0.00159323
Irbp	978.327	0.389196	0.0935395	4.16077	3.17176e-05	0.000227878
Grasp65	656.179	0.388618	0.101398	3.83262	0.000126787	0.000768974
Eato	2887.91	0.387928	0.109517	3.54218	0.000396832	0.00207225
CG12520	43.3402	0.387422	0.305498	1.26816	0.204739	0.339434
sbb	5365.68	0.387307	0.124257	3.11697	0.00182718	0.0076596
Grip128	1970.5	0.386897	0.109283	3.54034	0.000399612	0.00208483
cnk	2509.83	0.386679	0.0884083	4.37379	1.22108e-05	9.80502e-05
CG8080	418.973	0.38667	0.12058	3.20674	0.0013425	0.00592706
Arp5	248.054	0.386558	0.212262	1.82114	0.0685854	0.148776
wdn	2525.36	0.386306	0.08572	4.5066	6.5875e-06	5.70054e-05
CROT	988.771	0.386107	0.0924788	4.17509	2.9787e-05	0.000215445
CG17271	671.395	0.385946	0.132279	2.91767	0.00352663	0.0133464
Rev1	695.223	0.385877	0.095294	4.04933	5.13649e-05	0.000345235
CG5969	349.38	0.385799	0.128676	2.99822	0.00271564	0.0106602
pkaap	965.162	0.38534	0.101594	3.79295	0.00014887	0.000884101
CG11122	1859.62	0.385218	0.21223	1.8151	0.0695086	0.150274
Su(var)3-3	1304.72	0.384507	0.114323	3.36333	0.000770081	0.00365327
CG9650	212.872	0.384503	0.169304	2.27107	0.0231426	0.0631115
lncRNA:CR44057	10.8589	0.384277	0.403994	0.951195	0.341505	0.489962
asRNA:CR44155	1.67087	0.383874	0.349809	1.09738	0.272474	0.416796
bon	4510.75	0.383539	0.0991611	3.86784	0.000109805	0.000677424
asRNA:CR45134	4.5701	0.383511	0.406887	0.942548	0.345912	0.494189
CG2556	771.117	0.383254	0.11606	3.3022	0.000959285	0.00442522
Syx16	428.627	0.38323	0.131427	2.91591	0.00354655	0.0133981
Mybbp1A	1636.65	0.382459	0.0869889	4.39665	1.09937e-05	8.96137e-05
CG1943	4960.41	0.38202	0.0861574	4.43398	9.25089e-06	7.68291e-05
qin	879.513	0.381965	0.102533	3.72528	0.000195099	0.00111954
na	2.25221	0.3818	0.372345	1.02539	0.305178	0.45226
sws	4834.25	0.381784	0.089186	4.28076	1.8626e-05	0.000142819
Sos	2098.19	0.381701	0.092284	4.13616	3.53172e-05	0.000249486
Ercc1	166.6	0.381586	0.179359	2.12749	0.0333791	0.0842256
OstDelta	958.891	0.381566	0.122414	3.11703	0.00182685	0.0076596
CG5554	910.004	0.381122	0.121941	3.12547	0.00177522	0.00746764
CG2224	431.564	0.38098	0.124685	3.05555	0.00224645	0.00911369
Vps35	1568.63	0.380495	0.0961823	3.95598	7.6221e-05	0.000490202
Sms	3937.53	0.380389	0.0712146	5.34144	9.22107e-08	1.22762e-06
trbd	1420.19	0.380304	0.0631547	6.02178	1.72512e-09	3.33065e-08
Sil1	276.069	0.380164	0.139792	2.71949	0.00653818	0.0223048
Herc4	1948.98	0.379994	0.10234	3.71306	0.000204771	0.00116472
xmas	2943.67	0.379854	0.0874164	4.34534	1.3906e-05	0.000110473
CycY	1222.42	0.379741	0.102742	3.69606	0.000218969	0.0012353
gny	194.061	0.379587	0.196343	1.93329	0.053201	0.121954
Etf-QO	467.661	0.379549	0.129052	2.94106	0.00327087	0.0125203
CG17801	33.6298	0.379199	0.323512	1.17213	0.241143	0.381407
CCT2	10260.2	0.378997	0.047341	8.00568	1.18805e-15	5.48313e-14
Ggt-1	5877.2	0.378992	0.0973227	3.89418	9.85312e-05	0.000615709
CG3781	134.838	0.378804	0.195734	1.9353	0.0529539	0.121543
Art3	739.822	0.378747	0.106837	3.54509	0.000392486	0.00205287
scny	2995.26	0.378478	0.0843047	4.4894	7.14244e-06	6.12065e-05
comm3	2.75533	0.377861	0.373259	1.01233	0.311381	0.45821
rgr	728.174	0.377741	0.148477	2.5441	0.010956	0.0342423
CG6729	462.378	0.377722	0.120209	3.14222	0.00167673	0.00714008
CG31928	1105.1	0.377591	0.132928	2.84057	0.00450332	0.0163653
Wdr59	958.762	0.377537	0.0800582	4.71578	2.40783e-06	2.32669e-05
Ge-1	2294.44	0.377447	0.0784735	4.80987	1.5103e-06	1.54083e-05
CG10209	381.557	0.377371	0.149898	2.51751	0.0118186	0.0365962
Ent1	1060.58	0.377042	0.0873534	4.31628	1.58681e-05	0.000123889
Taf2	1258.72	0.376894	0.0859888	4.38306	1.17021e-05	9.4751e-05
fz4	2401.36	0.37671	0.0876933	4.29577	1.7409e-05	0.000134659
Hs2st	690.814	0.376563	0.0911075	4.13317	3.57796e-05	0.000252018
Nup44A	449.233	0.376162	0.116741	3.22218	0.0012722	0.00567163
CG3225	190.85	0.376104	0.165132	2.2776	0.0227503	0.062252
Dnz1	538.981	0.376082	0.133388	2.81945	0.00481059	0.0172591
yem	3149.28	0.375775	0.137295	2.73699	0.00620045	0.0214143
CG8950	470.467	0.375657	0.169945	2.21046	0.0270733	0.0716142
Ttc7	1206.56	0.375644	0.086948	4.32033	1.55794e-05	0.000122165
Gk2	1820.41	0.37561	0.0905296	4.14903	3.33881e-05	0.000238818
CG13344	1261.92	0.375159	0.0883487	4.24634	2.17288e-05	0.000162748
CG18262	211.892	0.375076	0.152196	2.46443	0.0137231	0.041361
Dlip3	112.247	0.375009	0.214219	1.75059	0.0800167	0.16768
Ubqn	4241.45	0.374701	0.0728132	5.14606	2.66019e-07	3.2188e-06
CG2678	320.011	0.374175	0.152262	2.45744	0.013993	0.0420268
BoYb	597.636	0.373898	0.0943383	3.96338	7.38965e-05	0.000477152
asun	402.979	0.373866	0.120659	3.09855	0.00194473	0.00806171
CG11396	727.607	0.373837	0.10646	3.51153	0.000445543	0.00229569
neb	861.48	0.373238	0.0893255	4.17841	2.9356e-05	0.000212804
Yif1	551.444	0.372784	0.129818	2.87159	0.00408413	0.0150336
hoe1	3118.35	0.372666	0.0678251	5.49451	3.91795e-08	5.67985e-07
IFT52	1.73686	0.372395	0.350691	1.06189	0.288286	0.434603
CG12091	1475.6	0.371916	0.0828011	4.49167	7.06657e-06	6.06099e-05
CG11753	114.959	0.371712	0.250068	1.48644	0.137162	0.251828
Idh3b	1896.27	0.371359	0.0864026	4.29801	1.7234e-05	0.000133412
ghi	192.927	0.371138	0.219473	1.69105	0.0908281	0.185006
mib2	1948.47	0.370871	0.112899	3.28497	0.00101993	0.00467385
nxf2	1014.08	0.370863	0.0928231	3.99538	6.45911e-05	0.000423557
sta	20538.3	0.370636	0.0921089	4.02389	5.72457e-05	0.000378462
H15	23.0201	0.370346	0.374231	0.989619	0.32236	0.470813
dom	18023.7	0.370321	0.106891	3.46446	0.000531298	0.00265293
Gug	5890.56	0.370132	0.134695	2.74792	0.00599742	0.0208042
alpha-Man-Ib	2280.01	0.369922	0.0610103	6.06327	1.33378e-09	2.62211e-08
RecQ4	2306.98	0.369861	0.131156	2.82001	0.00480229	0.0172448
Usp47	4689.27	0.36938	0.127362	2.90024	0.00372881	0.0139535
CG7903	294.117	0.369297	0.191497	1.92848	0.053796	0.122883
Rexo5	809.585	0.368826	0.120499	3.06083	0.00220723	0.00898467
Mgstl	599.439	0.368437	0.129518	2.84469	0.00444551	0.0161794
CG31935	600.519	0.368414	0.0994398	3.70489	0.00021148	0.00119793
CG3651	1889.54	0.368396	0.0755762	4.8745	1.09085e-06	1.15044e-05
Rga	1844.01	0.368381	0.138759	2.65482	0.00793517	0.0262932
Hydr1	597.229	0.368116	0.122724	2.99955	0.0027038	0.0106252
fz3	432.201	0.367937	0.162728	2.26106	0.0237555	0.0644203
Irp-1B	1752.77	0.367847	0.0944423	3.89493	9.82252e-05	0.000614193
CG2124	187.515	0.367443	0.167521	2.19341	0.0282776	0.0741923
alpha4GT1	661.99	0.367167	0.0969861	3.78577	0.000153231	0.000905006
Mcm5	3106.52	0.367053	0.0792055	4.63419	3.58346e-06	3.29515e-05
Reps	2404.32	0.3668	0.0529626	6.92565	4.33987e-12	1.27461e-10
CG33946	12.8672	0.366491	0.415695	0.881636	0.377974	0.526793
Arp6	409.279	0.366377	0.147573	2.48269	0.0130394	0.0397414
CG5191	885.455	0.366035	0.0848391	4.31446	1.59991e-05	0.000124649
eIF3e	2788.65	0.365992	0.0708082	5.16878	2.35621e-07	2.87975e-06
CG1971	34.0473	0.365103	0.329547	1.10789	0.267908	0.411565
Mcm7	2594.59	0.365057	0.0773303	4.72076	2.34968e-06	2.28876e-05
pita	1651.18	0.364979	0.123849	2.94696	0.00320914	0.0123278
Cbp80	2628.67	0.364077	0.0583907	6.23519	4.51231e-10	9.67551e-09
CG8043	210.006	0.363513	0.150795	2.41064	0.0159244	0.0467315
CG4210	51.3736	0.363268	0.280325	1.29588	0.195017	0.327688
Ppcs	471.651	0.362772	0.167537	2.16533	0.0303628	0.0784109
CG34347	209.026	0.362344	0.204041	1.77584	0.0757599	0.160988
Myt1	761.045	0.362241	0.128482	2.81938	0.00481161	0.0172591
gkt	560.011	0.362134	0.120542	3.00421	0.00266271	0.0104864
Sin3A	14083.6	0.361719	0.0775442	4.66469	3.0909e-06	2.9e-05
CG31687	81.6041	0.361672	0.235354	1.53671	0.124363	0.234586
CG5037	700.265	0.361561	0.0931456	3.88167	0.000103741	0.000644783
morgue	378.469	0.361442	0.116045	3.11467	0.00184149	0.00770959
Mcm6	2108.35	0.361017	0.108523	3.32665	0.000878975	0.00410556
HipHop	1627.2	0.360822	0.103846	3.47459	0.000511642	0.00257602
Art4	2574.59	0.359981	0.0992592	3.62667	0.000287095	0.00156044
Mcm2	1990.53	0.359845	0.0940173	3.82743	0.000129487	0.000782901
osk	18331.2	0.359685	0.0977702	3.67888	0.000234259	0.00131088
Nbr	2752.4	0.359515	0.103699	3.4669	0.000526488	0.00263434
DNApol-iota	1246.36	0.359165	0.104053	3.45176	0.000556953	0.00276112
Madm	1572.35	0.358986	0.0966451	3.71448	0.000203622	0.0011602
NaPi-III	3798.63	0.358931	0.0623952	5.75254	8.791e-09	1.47154e-07
tkv	1259.99	0.358879	0.135319	2.65209	0.00799947	0.0264791
Sf3b3	5001.4	0.358731	0.139034	2.58016	0.0098755	0.0314536
stas	1926.11	0.358696	0.0711622	5.04054	4.64208e-07	5.3181e-06
CG8009	70.8911	0.358436	0.306788	1.16835	0.242664	0.383233
nac	82.4351	0.358425	0.255687	1.40181	0.160972	0.283764
Tollo	942.73	0.358413	0.121118	2.9592	0.00308443	0.0119101
CG2310	669.718	0.358285	0.098829	3.62531	0.00028862	0.00156536
alpha-Man-IIb	4050.39	0.35788	0.0949271	3.77005	0.000163214	0.000956971
CG9784	475.836	0.357875	0.110057	3.25172	0.00114708	0.00519753
CG8838	3.82136	0.357756	0.395566	0.904415	0.365776	0.514474
Tnks	1894.8	0.357732	0.0903613	3.9589	7.52948e-05	0.000484566
Sec22	1085.11	0.357664	0.118462	3.01924	0.00253411	0.010068
Strumpellin	730.367	0.357165	0.112338	3.17939	0.00147588	0.00641157
Indy	2084.17	0.356782	0.0826618	4.31617	1.58759e-05	0.000123889
CG8726	1784.89	0.356744	0.070801	5.03868	4.68749e-07	5.35744e-06
CG46385	11177.1	0.356561	0.0753755	4.73046	2.2401e-06	2.18861e-05
Hsc70-5	3737.31	0.356509	0.0739981	4.81781	1.4514e-06	1.48386e-05
CG8892	538.998	0.356483	0.116515	3.05953	0.00221682	0.00901612
CG1628	254.762	0.355756	0.154265	2.30614	0.0211028	0.0586545
CG15744	2639.13	0.35553	0.0950663	3.73981	0.000184158	0.00106368
CG14309	3264.23	0.355439	0.239362	1.48494	0.137559	0.252408
AspRS	2774.18	0.35543	0.057927	6.13583	8.47183e-10	1.70705e-08
Wdr24	621.624	0.355377	0.0971363	3.65855	0.00025365	0.00140238
subdued	947.461	0.355343	0.0901595	3.94127	8.10525e-05	0.000517497
Saf6	392.871	0.355313	0.125435	2.83265	0.00461646	0.0166826
ORMDL	279.657	0.355259	0.168664	2.10631	0.0351776	0.0880347
crb	4206.42	0.354601	0.0647187	5.47911	4.27461e-08	6.16511e-07
Cdc6	1456.44	0.354595	0.122549	2.8935	0.0038097	0.0141959
Dgkepsilon	552.858	0.354555	0.111877	3.16915	0.00152885	0.00660322
CG14712	2332.28	0.354542	0.113357	3.12765	0.0017621	0.00742533
cdi	2953.33	0.354486	0.0963959	3.6774	0.000235622	0.00131623
CG13893	160.316	0.35437	0.201744	1.75654	0.0789968	0.166118
mRpL15	481.331	0.354281	0.122262	2.89772	0.00375887	0.0140389
CG3589	556.806	0.354257	0.113513	3.12085	0.00180328	0.00757581
sip2	1065.76	0.353876	0.116295	3.0429	0.00234307	0.00943456
CG33303	885.181	0.353597	0.153917	2.29732	0.0216005	0.0597125
Pcl	3272.42	0.353503	0.110077	3.21142	0.0013208	0.0058533
CG16727	6.48387	0.353419	0.402947	0.877086	0.38044	0.529276
Ubr1	6264.78	0.353317	0.0977668	3.61388	0.000301654	0.00162695
niki	1.98579	0.353245	0.349404	1.01099	0.31202	0.458683
sn	1504.69	0.353026	0.100607	3.50895	0.000449879	0.00231312
NaCP60E	160.633	0.352796	0.214615	1.64385	0.100206	0.198853
CG10376	825.099	0.352772	0.0968071	3.64407	0.000268357	0.00146861
CG1246	1.75895	0.352723	0.337585	1.04484	0.296096	0.44296
Rpn2	2818.25	0.352207	0.138875	2.53614	0.0112083	0.0349182
tun	1328.02	0.352051	0.11678	3.01465	0.00257277	0.010186
CG5902	581.305	0.351864	0.176244	1.99646	0.0458844	0.108546
Jwa	1004.34	0.351594	0.103169	3.40794	0.000654546	0.00318947
Sara	2297.62	0.351431	0.0781076	4.49931	6.8173e-06	5.87841e-05
CG18324	83.1033	0.351359	0.226764	1.54945	0.121274	0.230243
MBD-R2	1507.92	0.351253	0.155862	2.25361	0.0242207	0.0655353
mmy	1828.09	0.35123	0.119468	2.93995	0.00328261	0.0125503
ana2	606.223	0.351081	0.160859	2.18253	0.0290703	0.0758614
gcl	4946.02	0.351069	0.0962579	3.64717	0.000265143	0.00145513
Bap111	1813.79	0.351021	0.153575	2.28566	0.0222744	0.0612609
PIG-L	1147.3	0.350856	0.0780313	4.49635	6.91309e-06	5.93986e-05
CG11399	2909.26	0.350854	0.117094	2.99634	0.00273242	0.010713
XNP	2752.27	0.35078	0.0921335	3.80731	0.000140489	0.000842062
CG9578	300.158	0.350777	0.158964	2.20665	0.0273384	0.0721578
Mi-2	8439.73	0.350698	0.0983934	3.56424	0.00036491	0.00192631
AP-1-2beta	1612.08	0.350408	0.0807745	4.33809	1.43723e-05	0.000113711
mEFTs	752.271	0.350355	0.102551	3.41641	0.000634521	0.00310438
DNAlig4	587.728	0.350262	0.106333	3.29401	0.000987696	0.004539
ZnT35C	762.678	0.350262	0.110339	3.1744	0.00150146	0.00651104
CG6024	7.97248	0.350215	0.411638	0.850784	0.394889	0.54226
isopeptidase-T-3	280.599	0.349695	0.134921	2.59185	0.00954613	0.030535
CG1227	460.101	0.349038	0.107813	3.23744	0.00120608	0.00544111
Pink1	1991.2	0.348908	0.113696	3.06877	0.00214939	0.00877503
mahj	3186.77	0.348665	0.0982605	3.54837	0.000387619	0.00203071
SLO2	1689.89	0.348629	0.14952	2.33166	0.0197188	0.0555815
Spt20	2213.25	0.348479	0.101808	3.42291	0.000619538	0.00304491
CG7182	1711.81	0.348164	0.0729603	4.77197	1.82433e-06	1.83227e-05
Caf1-55	2068.6	0.348139	0.119977	2.9017	0.0037114	0.0139152
l(1)G0020	1776.2	0.348118	0.103326	3.36911	0.000754109	0.00358627
CG7384	1093.16	0.34805	0.102285	3.40275	0.000667117	0.00324111
Ir56b	16.5962	0.347992	0.377104	0.922802	0.35611	0.504225
nito	4043.82	0.347515	0.0941334	3.69173	0.000222737	0.00125249
CG1847	383.476	0.347111	0.113624	3.05491	0.00225125	0.00912933
CG3744	2748.27	0.347057	0.0608755	5.7011	1.19036e-08	1.94553e-07
dre4	2848.97	0.346911	0.102035	3.39993	0.000674022	0.00326631
geminin	668.774	0.346684	0.109035	3.17956	0.001475	0.00641064
CG8249	3.07704	0.346659	0.387221	0.89525	0.370654	0.51928
MKP-4	683.188	0.346577	0.100504	3.44838	0.000563964	0.00279159
TyrRS-m	210.369	0.346496	0.158518	2.18585	0.0288268	0.0753076
nan	1.12492	0.34641	0.327295	1.0584	0.289872	NA
vls	452.127	0.346292	0.12537	2.76215	0.00574213	0.0200447
CG7289	698.542	0.345583	0.104798	3.29763	0.000975062	0.00448732
SmD3	376.4	0.345563	0.133809	2.58251	0.00980835	0.0312706
CG12093	256.58	0.345511	0.133451	2.58905	0.00962416	0.0307625
CG6907	686.693	0.34536	0.102243	3.37782	0.000730618	0.00349514
CG2260	580.495	0.345311	0.158593	2.17734	0.0294554	0.0767013
ATP7	2516.52	0.344901	0.0813646	4.23896	2.24555e-05	0.000167621
CG4853	840.021	0.344779	0.0854351	4.03557	5.44696e-05	0.000362582
DNApol-delta	1529.94	0.344716	0.136883	2.51832	0.0117915	0.036524
CG9257	1087.81	0.344536	0.143987	2.39283	0.0167188	0.0485802
CG15814	1038.21	0.343914	0.110437	3.11412	0.00184494	0.00771405
Cpsf73	837.934	0.343597	0.105331	3.26208	0.00110599	0.0050278
Tre1	626.486	0.343389	0.106087	3.23687	0.0012085	0.00544111
PIG-V	858.938	0.343095	0.102577	3.34476	0.000823537	0.00387462
lncRNA:CR44707	30.8124	0.343082	0.340236	1.00836	0.313281	0.460238
Nprl2	483.805	0.34308	0.107441	3.19319	0.00140711	0.00616533
mop	3221.63	0.34303	0.116746	2.93826	0.00330055	0.012604
AlaRS	2458.57	0.342941	0.115446	2.97057	0.00297243	0.0115235
Nek2	700.74	0.342845	0.12341	2.7781	0.00546772	0.0192004
asRNA:CR43889	4.73221	0.342491	0.406598	0.842333	0.399601	0.54582
Axn	1844.39	0.34226	0.144977	2.36078	0.0182363	0.0521223
Naa20A	750.291	0.342142	0.128684	2.65878	0.00784236	0.0260181
CG7616	437.288	0.342137	0.129178	2.64858	0.00808312	0.0266978
Ocrl	1626.29	0.34204	0.0704625	4.85421	1.20867e-06	1.25691e-05
CG6325	1317.53	0.341961	0.0909853	3.75842	0.00017099	0.000994741
Seipin	462.784	0.341711	0.164454	2.07785	0.037723	0.092677
milt	5854.39	0.341558	0.0902031	3.78655	0.000152756	0.000903303
CG3847	1569.43	0.341519	0.0902015	3.78618	0.000152978	0.000904063
Alas	834.281	0.341479	0.102704	3.32488	0.000884566	0.0041278
CG11309	445.567	0.34131	0.124305	2.74575	0.00603726	0.0209125
CG13126	248.906	0.341223	0.153838	2.21807	0.0265498	0.0705375
CG12708	1054.13	0.340929	0.166009	2.05367	0.0400074	0.0972053
Tnpo	6575.43	0.34088	0.0588407	5.79327	6.90287e-09	1.17167e-07
mib1	1767.63	0.340841	0.0794365	4.29074	1.78077e-05	0.000137305
NO66	3473.42	0.340777	0.102619	3.3208	0.000897593	0.00417641
Rac1	1167.77	0.340638	0.12326	2.76358	0.00571712	0.0199677
asRNA:CR45714	37.8869	0.340581	0.315241	1.08038	0.279971	0.425277
cos	1612.69	0.340355	0.100285	3.39387	0.000689129	0.00332993
CG11403	1098.53	0.340223	0.108609	3.13255	0.00173292	0.00733129
CG11109	319.893	0.340059	0.199959	1.70064	0.0890101	0.182502
CG31559	8.23797	0.339779	0.413455	0.821806	0.411187	0.556519
CG11486	3956.27	0.339656	0.122817	2.76555	0.00568271	0.019869
CG42495	19.1747	0.339445	0.367697	0.923166	0.355921	0.504177
X11L	2716.63	0.339241	0.0625353	5.42479	5.80239e-08	8.05311e-07
CG9951	395.397	0.339202	0.157766	2.15003	0.0315527	0.080795
VhaSFD	2297.13	0.339173	0.0698412	4.85635	1.19572e-06	1.24478e-05
CG14636	1.57569	0.339112	0.345447	0.981662	0.326266	0.474522
RabX4	22.8331	0.338906	0.363794	0.931588	0.35155	0.499812
CG2218	2395.88	0.338653	0.0882614	3.83694	0.000124577	0.000756994
pps	2881.41	0.33849	0.127152	2.66209	0.00776582	0.0258292
CG9129	1.56247	0.338093	0.346083	0.976914	0.328612	0.477426
CG6511	703.421	0.337855	0.0944607	3.57667	0.000347997	0.00184912
Mekk1	4673.98	0.337581	0.0706696	4.77689	1.7803e-06	1.79177e-05
CG10927	99.5718	0.337138	0.22177	1.52022	0.128457	0.240348
Cyp9b2	51.1959	0.337083	0.282712	1.19232	0.233137	0.372865
CG3071	1717.45	0.337064	0.0789759	4.26793	1.97291e-05	0.00015009
PGRP-LE	568.555	0.337057	0.120936	2.78707	0.00531877	0.0187658
gwl	4695.17	0.337047	0.113506	2.96941	0.00298374	0.0115596
SRPK	3255.62	0.337029	0.10503	3.20888	0.00133251	0.00589444
CG14621	1253.35	0.336955	0.0948855	3.55118	0.000383508	0.00201461
AP-1mu	1150.51	0.336814	0.127278	2.64628	0.0081382	0.0268284
Ack	1334.09	0.33679	0.0833979	4.03835	5.38276e-05	0.000359458
Cks30A	741.827	0.336248	0.114764	2.9299	0.00339075	0.0128724
Ugt36E1	606.589	0.336179	0.126254	2.66271	0.00775135	0.0257899
CG9503	168.876	0.335866	0.196197	1.71188	0.0869189	0.179276
CG12325	989.342	0.335629	0.0946056	3.54766	0.000388665	0.00203508
gammaCOP	1420.27	0.335445	0.100282	3.34501	0.000822808	0.00387307
RanGAP	1713.81	0.335195	0.118777	2.82205	0.00477171	0.0171541
Mes4	249.483	0.335159	0.154233	2.17306	0.0297755	0.077327
CG4645	316.972	0.335003	0.129562	2.58567	0.00971899	0.0310061
Coq2	699.463	0.334819	0.0992843	3.37232	0.000745372	0.00354995
Dp1	8368.51	0.334794	0.0809557	4.13553	3.54144e-05	0.00024999
Gclm	1869.98	0.334697	0.101406	3.30056	0.000964922	0.00444488
hep	2373.18	0.334658	0.115264	2.90341	0.00369125	0.0138558
IntS14	416.2	0.334471	0.124586	2.68465	0.00726054	0.0243745
CG8177	3526.21	0.334293	0.0820654	4.0735	4.63121e-05	0.000316766
pip	32.27	0.334189	0.323125	1.03424	0.301023	0.448296
Sin	575.931	0.334121	0.115194	2.90051	0.00372557	0.0139522
pAbp	23606	0.333787	0.0835762	3.9938	6.50229e-05	0.000426061
lncRNA:CR44042	5.47479	0.333718	0.409477	0.814987	0.41508	0.560208
CG5290	470.708	0.33352	0.115278	2.89317	0.00381374	0.0142055
CG18278	39.9407	0.333339	0.337791	0.986819	0.323731	0.472246
Pex13	984.407	0.333271	0.0952828	3.49771	0.000469279	0.00239508
DNApol-alpha73	1290.45	0.333106	0.147985	2.25094	0.0243892	0.0659174
lncRNA:CR45507	4.4683	0.333041	0.40403	0.824296	0.409771	0.554989
EDTP	1889.57	0.332915	0.132706	2.50867	0.0121188	0.0373585
mtm	928.353	0.332904	0.118678	2.80511	0.00502995	0.0179163
jing	1327.94	0.332594	0.129517	2.56796	0.01023	0.0323698
RhoGAP5A	412.082	0.332418	0.134635	2.46902	0.0135484	0.0409706
CG3857	234.493	0.332199	0.169847	1.95588	0.0504795	0.116989
CG14100	421.018	0.332026	0.121718	2.72783	0.00637528	0.0218958
Nup54	1177.24	0.33141	0.074465	4.45055	8.56524e-06	7.19986e-05
CG14868	26.5514	0.331105	0.333677	0.992292	0.321055	0.46919
Arc42	989.227	0.331008	0.103836	3.1878	0.00143359	0.00626156
Pgant35A	710.954	0.330782	0.112361	2.94393	0.00324071	0.0124195
orb	6070.4	0.330626	0.0956449	3.45681	0.000546605	0.00272096
CG9586	400.316	0.330591	0.133139	2.48306	0.013026	0.0397132
CG13998	20.9471	0.330405	0.387722	0.85217	0.39412	0.541618
Mpcp2	8135.21	0.330362	0.111116	2.97314	0.00294774	0.0114324
cl	921.186	0.330333	0.128338	2.57393	0.0100551	0.0318999
CG32512	824.348	0.329432	0.169787	1.94026	0.052348	0.120423
PAPLA1	2660.96	0.329223	0.0890892	3.69544	0.00021951	0.00123764
CG31224	4619.06	0.328591	0.107934	3.04438	0.00233161	0.00939626
BtbVII	3673.32	0.328535	0.137384	2.39136	0.0167859	0.0487239
Nepl11	4.897	0.32846	0.407648	0.805743	0.420391	0.565657
CG1503	61.9057	0.328314	0.271689	1.20842	0.226887	0.365219
wake	1576.14	0.328266	0.0969853	3.38469	0.000712576	0.00342574
Nup133	1083.83	0.327872	0.125656	2.60929	0.00907304	0.0292738
Efhc1.1	3.92153	0.327659	0.396827	0.825698	0.408975	0.554515
Pgm1	1439.93	0.327638	0.0871664	3.75876	0.000170756	0.000993972
Msh6	2928.77	0.327546	0.115156	2.84437	0.0044499	0.0161894
Ykt6	467.032	0.327538	0.138824	2.35938	0.0183053	0.052304
kraken	826.018	0.327437	0.1291	2.5363	0.0112032	0.0349137
Taz	462.637	0.32706	0.142099	2.30163	0.021356	0.0591715
FANCI	756.7	0.326901	0.0946131	3.45513	0.000550017	0.00273373
Zip88E	205.669	0.326575	0.155386	2.10171	0.035579	0.0886891
CG11070	1488.7	0.326509	0.0856823	3.81069	0.000138579	0.000832676
CG15643	173.364	0.326301	0.198556	1.64337	0.100306	0.199011
SWIP	442.063	0.326266	0.127976	2.54943	0.0107898	0.0337884
Pxt	4458.37	0.326183	0.104898	3.10953	0.00187385	0.00781807
DCTN1-p150	2338.23	0.326127	0.097857	3.33269	0.000860108	0.00402519
CG4611	310.747	0.32561	0.150614	2.16188	0.0306275	0.0788844
CG10584	172.428	0.325409	0.1802	1.80582	0.0709464	0.152633
CG9098	136.495	0.325122	0.228843	1.42072	0.155397	0.2763
CG2211	251.789	0.325019	0.170316	1.90833	0.056349	0.127439
Vha100-1	1459.02	0.324807	0.136437	2.38063	0.017283	0.0498791
CAH2	753.686	0.324524	0.109453	2.96495	0.00302729	0.0117175
Cyp6a23	70.3487	0.324471	0.236487	1.37205	0.170049	0.295255
Uba1	8103.76	0.324111	0.117961	2.74762	0.00600304	0.0208163
Ada2b	1896.82	0.323777	0.104208	3.10703	0.00188979	0.00786764
CG4281	2081.05	0.323775	0.0917137	3.53028	0.000415125	0.00215414
CG5112	1577.68	0.323461	0.122805	2.63393	0.00844022	0.027608
Hasp	0.973842	0.32311	0.291937	1.10678	0.268389	NA
CG8526	103.732	0.32296	0.219739	1.46974	0.141631	0.258267
Nhe1	686.934	0.322921	0.0945254	3.41624	0.000634922	0.00310478
CG18259	801.613	0.322797	0.11372	2.83852	0.00453234	0.0164522
VhaPPA1-1	2407.18	0.322594	0.13851	2.32903	0.0198577	0.0558581
Tina-1	737.989	0.322587	0.0997202	3.23492	0.00121677	0.00546729
Gfat2	1431.07	0.322412	0.0779035	4.13861	3.4942e-05	0.000247196
CG10602	1997.95	0.32222	0.111818	2.88166	0.00395592	0.0146116
crc	1335.72	0.322039	0.0980512	3.2844	0.001022	0.0046811
CG4942	99.9048	0.321707	0.214806	1.49766	0.134221	0.248162
ifc	2052.61	0.321604	0.0788935	4.07643	4.5732e-05	0.000313462
CG1882	532.377	0.321233	0.124084	2.58884	0.00962995	0.0307625
nero	1065.78	0.32114	0.0895955	3.58433	0.000337945	0.00180362
ND-75	1873.81	0.320416	0.102152	3.13664	0.00170896	0.00726138
Trf4-2	1307.5	0.3201	0.129607	2.46978	0.0135197	0.0408967
MED19	884.661	0.320006	0.162044	1.97481	0.0482896	0.112831
CG30059	94.6315	0.319785	0.237052	1.34901	0.177334	0.30541
CG43658	2800.03	0.319386	0.17856	1.78868	0.0736672	0.157369
Spt3	62.423	0.319269	0.257743	1.23871	0.215453	0.353329
CG17167	61.1173	0.319065	0.282712	1.12859	0.259073	0.401576
MED16	332.788	0.318985	0.137623	2.31782	0.0204592	0.0571773
CG8360	177.883	0.318947	0.192749	1.65472	0.0979809	0.19576
CG6345	90.9599	0.318862	0.225831	1.41195	0.157965	0.280034
Uvrag	672.237	0.31861	0.100731	3.16299	0.00156158	0.00672063
ArfGAP1	1485.08	0.318466	0.0665051	4.78859	1.67954e-06	1.70273e-05
CG42445	327.539	0.31841	0.149503	2.12979	0.0331893	0.0839433
PRAS40	1287.99	0.318069	0.127196	2.50063	0.0123974	0.0380601
CG3078	2.54574	0.317015	0.376365	0.842308	0.399615	0.54582
l(3)07882	1595.09	0.316937	0.103256	3.06945	0.00214456	0.00876269
CG3430	675.038	0.316834	0.147089	2.15403	0.0312378	0.0801579
SMSr	1299.46	0.316689	0.0687423	4.6069	4.08707e-06	3.71245e-05
betaCOP	1487.49	0.316686	0.147978	2.14009	0.0323476	0.0822246
Yip1d1	411.733	0.31664	0.129711	2.44112	0.0146417	0.0435834
CG12084	2318.65	0.31648	0.0719368	4.39941	1.08544e-05	8.87021e-05
CG4908	303.795	0.316417	0.151259	2.09189	0.036448	0.090231
Pgant7	1508.78	0.316101	0.0778741	4.05912	4.92578e-05	0.000332687
clu	4392.42	0.3158	0.0981713	3.21683	0.00129617	0.00576675
Fancm	1087.62	0.315631	0.0852483	3.70249	0.00021349	0.00120861
tej	762.241	0.315591	0.0925409	3.41028	0.000648955	0.00316382
crim	339.519	0.315553	0.117393	2.68801	0.00718792	0.024181
mus101	2345.15	0.315465	0.102939	3.06459	0.00217969	0.00888376
CD98hc	5354.38	0.315336	0.0555884	5.6727	1.40564e-08	2.24909e-07
MED24	1013.35	0.314596	0.115752	2.71785	0.00657069	0.0223921
CG14977	250.309	0.31443	0.141722	2.21864	0.0265113	0.0704932
RpI135	867.066	0.314392	0.110804	2.83738	0.00454854	0.0164925
CG42514	286.597	0.314347	0.161917	1.94141	0.0522084	0.120191
Rbbp5	262.943	0.313995	0.152262	2.0622	0.0391884	0.0956951
Rabex-5	565.433	0.313899	0.134611	2.33189	0.0197063	0.0555815
CG13599	239.836	0.313833	0.151169	2.07604	0.0378903	0.093012
Ucp4A	512.687	0.313712	0.141874	2.2112	0.0270219	0.0715563
cm	505.713	0.31364	0.148565	2.11113	0.0347609	0.0871675
Os-C	5.13468	0.313569	0.406462	0.77146	0.440435	0.583075
VhaAC45	2445.76	0.313526	0.11512	2.72347	0.00646009	0.0221007
CG5937	9.3334	0.313483	0.407868	0.768588	0.442138	0.584372
CG11655	537.411	0.313215	0.108541	2.88568	0.00390566	0.014459
CG15706	405.277	0.313078	0.121592	2.57483	0.0100289	0.0318479
Taf5	728.316	0.312561	0.118449	2.63878	0.00832045	0.0272623
AMPKalpha	1573.71	0.312256	0.0637116	4.90109	9.53065e-07	1.02067e-05
Pp1-87B	3038.94	0.312169	0.0709705	4.39857	1.08967e-05	8.88978e-05
Rcc1	7260.09	0.311886	0.097916	3.18524	0.00144635	0.00631035
alpha-Est3	596.784	0.311856	0.141012	2.21155	0.026998	0.0715126
Capr	3445.04	0.311852	0.13546	2.30217	0.0213256	0.0591212
NSD	7101.33	0.311836	0.10189	3.06052	0.0022095	0.00899011
CG14764	2401.12	0.31175	0.0827028	3.76952	0.000163559	0.000958415
CG5853	677.852	0.311698	0.18759	1.6616	0.0965938	0.193828
CG7456	914.875	0.31166	0.0797735	3.90681	9.35222e-05	0.000588965
CG4558	825.132	0.31137	0.100043	3.11238	0.00185586	0.00774966
CdGAPr	2540.19	0.311252	0.120435	2.58439	0.00975516	0.0311112
feo	2665.66	0.311135	0.110938	2.80458	0.00503828	0.0179328
CG9864	581.123	0.311121	0.153269	2.02989	0.0423673	0.101665
cuff	67.7521	0.310995	0.270197	1.15099	0.249735	0.391338
CG5745	1072.57	0.310989	0.097469	3.19065	0.00141953	0.00620852
rno	4891.86	0.310961	0.0998035	3.11573	0.00183487	0.00768522
CG3652	311.71	0.310878	0.169192	1.83743	0.0661468	0.144651
Zip48C	212.762	0.310599	0.171756	1.80837	0.0705484	0.152181
PPO3	64.1143	0.310497	0.302076	1.02787	0.304009	0.45108
SmydA-1	781.885	0.310473	0.133438	2.32672	0.0199804	0.0561468
Cp7Fc	1360.28	0.310441	0.113186	2.74276	0.00609248	0.0210887
CG9399	478.136	0.309899	0.127953	2.42197	0.0154365	0.0456218
ppl	202.624	0.309803	0.171536	1.80605	0.0709108	0.15259
Rack1	14411.5	0.309501	0.0887612	3.4869	0.000488657	0.00247314
or	294.624	0.30942	0.167804	1.84393	0.0651932	0.143018
CG3626	1155.8	0.309372	0.0914663	3.38236	0.000718664	0.00344987
Hr4	415.208	0.309342	0.186519	1.6585	0.0972159	0.194552
CG32452	407.53	0.309312	0.162942	1.8983	0.0576565	0.129503
CG10151	7.20674	0.309082	0.410675	0.752619	0.451679	0.59302
Mlh1	606.813	0.309079	0.101346	3.04974	0.00229037	0.00926084
CG6000	27.9619	0.309016	0.346625	0.8915	0.372661	0.521489
CG8569	384.887	0.308698	0.157106	1.9649	0.0494261	0.114987
dpa	2489.25	0.308512	0.0870802	3.54285	0.000395827	0.00206812
lncRNA:CR45793	5.33468	0.308372	0.408614	0.754677	0.450443	0.591718
eIF3f1	2258.8	0.308049	0.0778848	3.95518	7.64765e-05	0.000491519
beta3GalTII	177.44	0.307976	0.178205	1.72821	0.0839503	0.174079
Pcyt1	994.07	0.307966	0.0964172	3.19409	0.00140271	0.00614883
Hel25E	5301.78	0.30777	0.11738	2.62198	0.00874194	0.0284509
CG14971	738.07	0.30762	0.125256	2.45594	0.0140516	0.0421766
hop	3423.36	0.307454	0.0731554	4.20275	2.63689e-05	0.000193759
Hpr1	669.052	0.307444	0.108675	2.82901	0.00466919	0.0168543
SCAP	2273.79	0.306714	0.086394	3.55017	0.000384977	0.00201905
tho2	2375.45	0.306686	0.120602	2.54296	0.0109918	0.0343209
Itp-r83A	2705.76	0.306608	0.14561	2.10568	0.0352321	0.0881211
l(1)G0320	1995.48	0.306056	0.18157	1.68561	0.0918705	0.186375
okr	623.158	0.30582	0.0956588	3.19699	0.0013887	0.0060957
CG11970	1513.26	0.305684	0.101087	3.02398	0.00249473	0.00993791
mTTF	279.48	0.305474	0.148091	2.06274	0.0391375	0.0956191
prod	566.313	0.30543	0.143605	2.12688	0.03343	0.0842902
wus	643.162	0.304898	0.097155	3.13826	0.00169952	0.00722447
Mpc1	472.154	0.304826	0.116699	2.61207	0.00899956	0.0291134
eEFSec	125.02	0.304596	0.244869	1.24391	0.213531	0.351067
DCTN5-p25	158.95	0.304348	0.192061	1.58464	0.113047	0.217997
ND-39	1506.32	0.303734	0.160183	1.89617	0.0579379	0.129955
anchor	2182.33	0.303525	0.0868245	3.49585	0.000472559	0.00240801
ari-2	1443.49	0.303514	0.131111	2.31494	0.0206162	0.0575827
CG1544	12.4955	0.303461	0.404428	0.750344	0.453047	0.594494
CG31661	852.767	0.303062	0.182605	1.65966	0.096983	0.194166
CG32473	2467.64	0.303028	0.0896715	3.37931	0.000726689	0.00347978
pygo	2767.08	0.302591	0.145062	2.08595	0.0369834	0.0912765
CG7156	1245.8	0.302565	0.107054	2.82628	0.00470926	0.0169737
jagn	1484.21	0.302211	0.105649	2.86052	0.00422947	0.0154804
CG18011	510.685	0.301931	0.119658	2.52328	0.0116267	0.0361056
Hexo2	380.065	0.301919	0.152897	1.97466	0.0483068	0.112832
beta-PheRS	1000.05	0.301881	0.0939914	3.21179	0.0013191	0.00585016
CG17470	5.91778	0.301773	0.411567	0.733229	0.463419	0.604096
CG33523	1409.91	0.301519	0.0761563	3.95921	7.51971e-05	0.00048426
CG11007	653.828	0.301463	0.110868	2.71911	0.00654571	0.0223227
Rat1	1628.66	0.301399	0.0980282	3.07462	0.00210772	0.00863035
ArfGAP3	1650.43	0.301206	0.101856	2.95719	0.00310456	0.0119735
PsGEF	2.3451	0.301173	0.37916	0.794317	0.427011	0.571787
CycG	12546.2	0.30096	0.0716242	4.20193	2.64653e-05	0.000194319
PpV	1159.42	0.300926	0.10615	2.83492	0.00458377	0.0165892
Top3alpha	1280.83	0.300727	0.081441	3.69257	0.000221998	0.00124996
CG6415	2.70391	0.300581	0.362658	0.828827	0.407202	0.552978
Got1	2487.92	0.300558	0.0835983	3.59527	0.000324059	0.00173908
CG9394	20.4267	0.300377	0.38396	0.782314	0.43403	0.577674
asRNA:CR44168	4.01575	0.300353	0.404106	0.743251	0.457329	0.59817
Ppox	471.773	0.300305	0.106831	2.81102	0.00493847	0.0176293
Megf8	3082.19	0.30026	0.0735161	4.08428	4.42136e-05	0.000304637
Set2	4547.31	0.300078	0.120713	2.48588	0.0129233	0.0394371
r-l	1457.22	0.299796	0.102898	2.91352	0.00357375	0.0134931
Pex23	1672.19	0.29936	0.122375	2.44624	0.0144354	0.0431148
slam	1596.4	0.299258	0.148444	2.01596	0.0438044	0.104595
bsf	3266.1	0.299244	0.0719994	4.1562	3.23588e-05	0.00023214
Rpt4	1400.65	0.299206	0.159253	1.8788	0.0602714	0.134041
CG3726	597.146	0.299139	0.104185	2.87124	0.00408862	0.0150444
Muc11A	8.31048	0.298796	0.413158	0.723201	0.469557	0.610003
CG31279	12.5003	0.298747	0.397837	0.750928	0.452696	0.594113
Ptp61F	2844.07	0.298536	0.0899532	3.31879	0.000904096	0.00420264
CG8944	2268.79	0.298408	0.0559862	5.33002	9.82031e-08	1.30025e-06
CG12299	1348.48	0.298216	0.104583	2.85146	0.00435185	0.0158684
CG18789	32.9916	0.298162	0.384098	0.776265	0.437592	0.581058
fbl	1137.77	0.298014	0.105427	2.82673	0.00470266	0.0169562
CG1620	1780.34	0.297965	0.0802792	3.71161	0.000205941	0.00116998
l(2)05287	2646.29	0.297965	0.0697721	4.27055	1.94994e-05	0.000148693
sro	148.195	0.297725	0.261486	1.13859	0.254873	0.396888
CG5455	508.795	0.297556	0.164723	1.8064	0.0708552	0.152539
asRNA:CR45969	3.38906	0.297494	0.393107	0.756777	0.449183	0.590864
Tim8	966.786	0.297355	0.0791621	3.75628	0.000172457	0.00100147
Atf-2	285.888	0.297182	0.139207	2.13482	0.0327756	0.0831356
CG3530	758.054	0.297182	0.0903263	3.29009	0.00100155	0.00460047
CG4968	924.397	0.29707	0.0917849	3.23659	0.00120966	0.00544111
Mtr4	1810.45	0.296733	0.0743009	3.99366	6.50609e-05	0.000426061
mnd	1150.78	0.296704	0.0894514	3.31693	0.000910139	0.00422668
Gmer	185.576	0.296613	0.163406	1.81519	0.0694952	0.150274
Nup62	906.762	0.296553	0.0898119	3.30193	0.000960206	0.00442736
CG8531	1340.65	0.296512	0.107637	2.75474	0.00587392	0.0204417
lncRNA:CR43904	1.90937	0.296276	0.355081	0.83439	0.404061	0.550255
GstE1	720.49	0.296209	0.164949	1.79576	0.0725326	0.155531
CG4911	3677.28	0.295836	0.0592488	4.9931	5.94167e-07	6.61915e-06
CG3156	494.543	0.295803	0.110451	2.67814	0.00740315	0.0247931
for	6896.51	0.295692	0.0741535	3.98756	6.67553e-05	0.000436273
CG14683	918.088	0.295584	0.102958	2.87091	0.00409295	0.0150546
Tak1	1198	0.295031	0.109542	2.69331	0.00707458	0.0238659
Pif1	1494.11	0.294879	0.0711873	4.14229	3.43857e-05	0.000244068
Hr96	1063.59	0.294857	0.101743	2.89805	0.00375491	0.0140349
HPS4	787.757	0.294725	0.0912222	3.23085	0.00123425	0.00553043
lncRNA:CR45530	1.51201	0.294618	0.342052	0.861326	0.389058	0.537374
asRNA:CR42871	38.5903	0.294576	0.29594	0.995392	0.319546	0.467406
FIG4	263.548	0.2945	0.144748	2.03457	0.0418941	0.100954
Kr-h2	732.656	0.294178	0.111767	2.63208	0.00848642	0.0277217
Upf1	2112.96	0.294167	0.0796842	3.69167	0.000222791	0.00125249
CG9527	337.133	0.293977	0.153097	1.92021	0.0548319	0.12469
RpI1	3256.93	0.293486	0.0819919	3.57945	0.000344322	0.00183361
Aps	3431	0.293474	0.0921954	3.18318	0.00145669	0.00633958
CG34384	1.05631	0.293068	0.284899	1.02867	0.303634	NA
CG9330	1540.2	0.29298	0.0682857	4.2905	1.78274e-05	0.000137348
SCCRO4	1235	0.292552	0.0767854	3.80999	0.000138972	0.00083452
CG17078	1387.39	0.292527	0.14227	2.05614	0.0397693	0.0967722
l(2)37Cg	122.249	0.292487	0.219196	1.33437	0.182084	0.311135
CG5599	1174.87	0.292424	0.09848	2.96937	0.00298412	0.0115596
Surf4	1806.24	0.292237	0.147535	1.98079	0.0476144	0.111549
Tnpo-SR	1066.91	0.292069	0.111201	2.62649	0.008627	0.0281146
CG16908	625.608	0.292009	0.087829	3.32474	0.000885015	0.0041278
Zwilch	877.599	0.291583	0.111604	2.61265	0.00898429	0.0290737
CG7326	1665.47	0.291544	0.0903139	3.22811	0.00124609	0.00556807
CG13667	134.425	0.291135	0.184378	1.57901	0.114333	0.219689
CG4880	762.035	0.290988	0.218588	1.33122	0.183117	0.312624
olf186-F	1390.75	0.290712	0.121728	2.38821	0.0169306	0.0490704
Syt14	2.50941	0.290529	0.368849	0.787666	0.430892	0.574998
Hsl	2367.03	0.290409	0.095257	3.04869	0.00229838	0.00928163
Sep1	2923.06	0.290275	0.0692552	4.19138	2.7726e-05	0.000202197
CG42324	33.8883	0.290263	0.309573	0.937623	0.348438	0.496773
CG2701	655.57	0.290104	0.105404	2.75231	0.00591769	0.0205718
Sur-8	1126.38	0.289442	0.0754038	3.83855	0.000123762	0.000752509
e(y)3	9247.69	0.289427	0.133046	2.1754	0.0296002	0.0769956
CG3065	503.553	0.288966	0.112015	2.5797	0.00988871	0.0314809
CG10265	163.755	0.288862	0.214614	1.34596	0.178315	0.306533
pHCl-2	1.32552	0.288706	0.321303	0.898546	0.368895	0.517638
Sema2b	93.1427	0.288675	0.261725	1.10297	0.27004	0.414052
CG14231	615.506	0.288608	0.124463	2.31882	0.020405	0.057071
car	997.669	0.288583	0.0910068	3.17101	0.00151911	0.00656994
CG31041	2.76992	0.288554	0.373942	0.771656	0.440318	0.583075
AOX1	424.215	0.288509	0.135003	2.13707	0.0325925	0.0827361
CG31937	729.199	0.287972	0.119502	2.40976	0.015963	0.0467979
AOX2	56.8316	0.287627	0.275525	1.04392	0.29652	0.443278
CG1233	1183.63	0.287555	0.107477	2.67549	0.0074621	0.0249574
CDK2AP1	615.822	0.287195	0.131826	2.1786	0.0293617	0.0765189
IntS10	415.672	0.286603	0.122263	2.34416	0.0190701	0.0540904
CG12241	993.228	0.28659	0.0861245	3.32762	0.000875909	0.00409321
ida	501.178	0.286517	0.131642	2.1765	0.0295181	0.0768232
MAN1	2236.24	0.286464	0.122142	2.34535	0.0190094	0.0539341
snz	1812.35	0.286386	0.0831103	3.44585	0.000569271	0.00281212
CG8323	148.218	0.28632	0.200301	1.42944	0.152876	0.27312
CG11378	84.065	0.286191	0.250802	1.14111	0.253826	0.396085
CycE	6521.65	0.285922	0.108079	2.64549	0.00815727	0.0268638
pzg	3881.74	0.28588	0.121678	2.34948	0.0187998	0.0534178
Glyat	4.25241	0.285779	0.396763	0.720277	0.471354	0.611153
CG6966	2772.97	0.285592	0.103843	2.75022	0.00595551	0.0206811
snsl	6.38995	0.28519	0.40941	0.696588	0.48606	0.623485
CG7222	850.723	0.285181	0.0994399	2.86787	0.00413246	0.0151769
CG4360	2641.83	0.285092	0.077922	3.65869	0.000253511	0.00140238
Hyccin	1316.09	0.284973	0.0905659	3.14658	0.00165189	0.00705293
px	1651.39	0.284869	0.204128	1.39554	0.162853	0.286092
CG5966	834.068	0.284752	0.114231	2.49277	0.0126752	0.0387779
D12	1046.83	0.28459	0.134017	2.12353	0.0337095	0.0848823
Mad	1775.59	0.28412	0.069773	4.07207	4.65974e-05	0.000318268
CG12182	294.191	0.284115	0.127077	2.23578	0.0253664	0.0680623
Ndfip	714.208	0.28386	0.139294	2.03784	0.0415656	0.100301
CG31326	1.20909	0.283476	0.323412	0.876519	0.380748	0.529366
lncRNA:CR44331	3.2523	0.283382	0.39248	0.722029	0.470277	0.610409
lncRNA:CR45010	1.17248	0.283318	0.28061	1.00965	0.312662	0.459487
CG1344	1764.9	0.283204	0.0625404	4.52834	5.94489e-06	5.21429e-05
Idh3a	2534.74	0.283199	0.0720183	3.93231	8.41318e-05	0.000535394
CG5805	1025.56	0.283104	0.0811885	3.487	0.000488469	0.00247314
tj	898.691	0.283063	0.122532	2.31011	0.0208819	0.0581071
SkpB	2.46161	0.282947	0.358371	0.789536	0.429799	0.574111
CG7766	3743.56	0.282915	0.0844267	3.35101	0.00080516	0.00379738
CG9896	659.512	0.282668	0.131274	2.15327	0.0312976	0.0802689
CG17036	179.51	0.282452	0.257183	1.09825	0.272094	0.416478
Rad23	3724.28	0.282452	0.0607827	4.64691	3.36936e-06	3.12197e-05
aph-1	632.608	0.282347	0.112711	2.50506	0.0122432	0.0376464
Gcn5	1163.05	0.282277	0.0885125	3.18912	0.00142706	0.00623863
e(r)	1323.2	0.282191	0.0973901	2.89753	0.00376113	0.0140419
CG34348	1419.72	0.282188	0.100061	2.82017	0.00479982	0.0172424
Ntf-2	1575.02	0.282175	0.108993	2.58892	0.00962777	0.0307625
Zw	236.815	0.281894	0.145785	1.93363	0.0531589	0.121887
Zw10	2294.08	0.281749	0.0871236	3.2339	0.0012211	0.00548001
CG3500	273.225	0.281366	0.147844	1.90313	0.0570233	0.12851
Aduk	402.525	0.281232	0.120638	2.33121	0.0197425	0.0556235
Jheh1	147.47	0.281064	0.175296	1.60337	0.108852	0.211125
CG10495	316.341	0.280977	0.140079	2.00585	0.0448727	0.106621
CG7523	215.396	0.280922	0.158045	1.77748	0.0754887	0.160482
Ubc4	1488.85	0.280706	0.0933303	3.00767	0.00263263	0.0103897
Patj	1384.63	0.280435	0.0923046	3.03815	0.00238035	0.00954169
RpL4	8313.41	0.280047	0.0637382	4.3937	1.11435e-05	9.06066e-05
LeuRS	2777.08	0.280042	0.0968361	2.89192	0.00382901	0.0142405
Plc21C	2825.6	0.279973	0.32158	0.870618	0.383963	0.532441
AIMP3	282.049	0.279765	0.16291	1.7173	0.0859239	0.177559
eIF4B	71.5688	0.279761	0.360957	0.775053	0.438308	0.581722
CG10809	468.407	0.279632	0.132818	2.10537	0.0352588	0.0881638
dos	2150.36	0.279618	0.106084	2.63581	0.0083937	0.0274651
Arl6IP1	805.054	0.279537	0.128419	2.17676	0.0294981	0.0767919
CG17752	7.16053	0.279334	0.391238	0.713973	0.475244	0.614797
Not10	610.632	0.279214	0.109139	2.55833	0.0105178	0.0330861
ck	3586.8	0.279004	0.0700047	3.98551	6.73347e-05	0.000439467
CG10428	604.93	0.278848	0.0940664	2.96437	0.00303301	0.0117349
CG12081	692.689	0.278813	0.104296	2.67329	0.00751123	0.0250944
spir	2212.54	0.278752	0.151913	1.83494	0.0665146	0.145325
Oseg2	2.30715	0.278562	0.368552	0.755829	0.449752	0.591173
IntS11	806.919	0.278561	0.0963799	2.89024	0.00384952	0.0142894
CG4788	514.713	0.278512	0.141762	1.96465	0.049455	0.115011
eIF3m	3072.79	0.278185	0.128199	2.16995	0.0300106	0.0777738
inc	1408.63	0.278123	0.124308	2.23736	0.0252628	0.0678632
l(1)G0045	744.052	0.277727	0.112731	2.46361	0.0137544	0.0414127
ry	4.12774	0.277548	0.386078	0.718892	0.472207	0.611649
Sfmbt	3565.19	0.277506	0.0670805	4.13692	3.52003e-05	0.000248841
Dlg5	3409.42	0.277231	0.115705	2.39602	0.0165741	0.0482246
Sec6	339.315	0.27721	0.157413	1.76104	0.0782318	0.164974
Act5C	15271.6	0.277068	0.112689	2.45869	0.0139444	0.0419183
Acer	1563.72	0.276996	0.13943	1.98663	0.0469636	0.110478
slgA	3248.71	0.276985	0.0655668	4.22447	2.39505e-05	0.000177546
DCTN4-p62	756.71	0.276614	0.0911379	3.03511	0.00240446	0.00962579
Rcd1	2964.06	0.276535	0.0565066	4.89386	9.88787e-07	1.05543e-05
CG12863	161.209	0.276515	0.185478	1.49082	0.136008	0.250606
Cdk2	1203.2	0.27647	0.13015	2.12423	0.0336507	0.0847564
PIG-T	920.994	0.276126	0.135289	2.041	0.0412504	0.0996507
atms	762.604	0.276109	0.13139	2.10145	0.0356013	0.0887013
E(spl)mbeta-HLH	17.3709	0.27607	0.386529	0.714227	0.475087	0.614676
TMEM216	1527.51	0.275992	0.12727	2.16856	0.0301162	0.0779244
CG2004	807.007	0.275925	0.114275	2.41457	0.0157537	0.0463807
mwh	38.2738	0.275632	0.306733	0.898606	0.368863	0.517638
Pdk	1081.24	0.275616	0.183098	1.50529	0.13225	0.245643
Rca1	1161.96	0.275575	0.132202	2.0845	0.037115	0.09152
ocm	2321.93	0.275468	0.112208	2.45497	0.0140895	0.0422641
thoc6	422.909	0.275406	0.132427	2.07968	0.0375551	0.0923349
CG6454	2278.15	0.275229	0.0597859	4.60357	4.15302e-06	3.7653e-05
lncRNA:CR44363	0.983391	0.275116	0.303616	0.90613	0.364867	NA
CG33156	993.363	0.27511	0.113412	2.42575	0.0152768	0.0452238
Rbf	4147.71	0.274535	0.0686674	3.99804	6.3868e-05	0.000419098
Nelf-A	1790.03	0.274363	0.115257	2.38044	0.017292	0.0498791
Grip91	1365.03	0.273954	0.0997351	2.74681	0.00601776	0.0208524
CG7504	2495.65	0.273819	0.079291	3.45334	0.000553687	0.00274774
dsb	135.344	0.273814	0.210128	1.30308	0.192547	0.324566
mars	1405.79	0.273639	0.156096	1.75302	0.0795983	0.167093
CG7142	12.1782	0.273534	0.409699	0.667647	0.504359	0.640829
U4-U6-60K	943.298	0.273394	0.103253	2.64782	0.00810134	0.0267342
SIDL	820.553	0.273245	0.122022	2.23931	0.0251358	0.067596
Skp2	1885.88	0.273003	0.0682645	3.99919	6.35604e-05	0.000417363
Raf	1672.11	0.272937	0.0733317	3.72195	0.000197688	0.00113171
unc	60.0799	0.272462	0.258312	1.05478	0.291528	0.437788
ogre	652.363	0.272411	0.130112	2.09367	0.0362895	0.0899074
CG1116	263.7	0.272372	0.164013	1.66067	0.0967788	0.193962
CG34231	64.4441	0.272296	0.280731	0.969956	0.332068	0.480718
CG4901	1466.3	0.272183	0.08046	3.38284	0.000717411	0.00344556
Cdc5	1597.29	0.272019	0.119117	2.28363	0.0223935	0.0614665
ND-B14.5A	410.647	0.271252	0.196982	1.37704	0.168501	0.293251
CG6330	435.241	0.270678	0.123035	2.20001	0.0278065	0.0732141
CG14440	719.083	0.270395	0.101318	2.66878	0.00761264	0.0253894
CG5033	1210.07	0.270316	0.0942365	2.86849	0.00412438	0.0151529
CG31344	405.468	0.270294	0.134233	2.01361	0.0440502	0.105079
PAN2	1204.97	0.269915	0.15477	1.74398	0.0811628	0.169566
Rab27	261.825	0.269754	0.217417	1.24072	0.214709	0.352526
CalpC	659.836	0.269661	0.101344	2.66085	0.00779437	0.0259064
SelD	3398.35	0.269285	0.0519429	5.18425	2.16882e-07	2.67432e-06
REG	1872.73	0.269189	0.147179	1.82899	0.0674008	0.146737
CG9925	3049	0.269136	0.0913577	2.94596	0.00321955	0.0123629
CG6145	726.268	0.26909	0.104049	2.5862	0.00970414	0.0309689
lt	1093.2	0.268843	0.206726	1.30048	0.193435	0.325707
slim	1767.86	0.268531	0.0891151	3.01331	0.00258415	0.0102268
CG17119	71.7771	0.26843	0.295885	0.907211	0.364295	0.513041
DppIII	4918.78	0.268345	0.0951979	2.81882	0.00482012	0.0172833
CG15118	1115.3	0.268238	0.0897701	2.98806	0.00280756	0.0109604
CG10565	2413.47	0.26813	0.0983369	2.72665	0.00639807	0.021935
CycB	42749.5	0.267943	0.102721	2.60844	0.00909552	0.0293259
Gr32a	7.08028	0.267938	0.410733	0.652342	0.514181	0.649477
CG8399	921.749	0.267757	0.111106	2.40993	0.0159554	0.0467896
Naa35	684.185	0.267714	0.100279	2.66969	0.00759203	0.0253294
CG5726	2019.44	0.267491	0.0885014	3.02245	0.00250737	0.00998007
Sfxn2	481.322	0.267446	0.139581	1.91607	0.0553566	0.125677
wash	523.744	0.267171	0.171474	1.55808	0.119213	0.227265
CG9915	1282.37	0.266184	0.122977	2.1645	0.0304262	0.0785328
Ir76a	104.934	0.266097	0.205281	1.29626	0.194886	0.327582
Jheh3	233.098	0.265948	0.170086	1.56361	0.117909	0.22531
RpII15	412.329	0.265588	0.131729	2.01617	0.043782	0.104568
CG33177	1.19642	0.265343	0.316353	0.838758	0.401605	0.547371
Usp20-33	1935.97	0.264809	0.0668711	3.95999	7.49518e-05	0.000483
CG7154	1512.69	0.264681	0.147567	1.79363	0.0728721	0.156014
lncRNA:CR45564	2.43591	0.264677	0.379079	0.698213	0.485044	0.622895
lncRNA:CR43685	394.212	0.264663	0.111501	2.37364	0.0176136	0.0507163
Gtp-bp	913.586	0.264212	0.113934	2.31899	0.0203957	0.057071
CG9536	1032.59	0.264184	0.114528	2.30672	0.0210704	0.0585813
mtgo	2203.51	0.26414	0.119391	2.2124	0.0269391	0.0713762
svr	3143.6	0.264061	0.101691	2.5967	0.00941242	0.030207
l(2)k10201	185.589	0.263983	0.167717	1.57398	0.115492	0.221434
Ube3a	1491.38	0.263879	0.0853797	3.09066	0.00199715	0.00825249
SPoCk	4027.17	0.263476	0.0456935	5.76616	8.10988e-09	1.35988e-07
Sdic2	30.6873	0.263032	0.354647	0.741674	0.458285	0.599238
CG1418	375.073	0.262971	0.116896	2.24961	0.0244735	0.0661086
DUBAI	1798.46	0.262932	0.0663363	3.96362	7.38215e-05	0.000476985
CG13045	1.47154	0.262902	0.337643	0.778638	0.436193	0.579836
CG10492	2523.03	0.26268	0.157271	1.67024	0.0948729	0.191166
CG45071	362.255	0.262336	0.133143	1.97033	0.0488002	0.113807
CG3164	1276.24	0.262261	0.154843	1.69372	0.090318	0.184312
wtrw	175.479	0.261891	0.203863	1.28465	0.198916	0.332166
CG13016	494.156	0.261507	0.116777	2.23937	0.0251319	0.067596
AdSS	3005.32	0.261301	0.0957993	2.72759	0.00637993	0.0219038
lncRNA:CR44816	3.65159	0.261189	0.39337	0.663978	0.506704	0.642852
Hrs	532.207	0.260882	0.199643	1.30675	0.191299	0.322953
trbl	843.808	0.260464	0.0864626	3.01245	0.00259151	0.0102518
Pgant1	856.562	0.260448	0.117119	2.22378	0.0261633	0.0698168
Prp31	621.049	0.260165	0.128535	2.02408	0.0429616	0.102938
mor	4418.48	0.260011	0.129835	2.00262	0.0452184	0.107311
Mvl	1839.2	0.259921	0.0632704	4.1081	3.98929e-05	0.00027756
CG33298	4847.62	0.259639	0.0701599	3.70068	0.000215022	0.00121586
Pdp	1164.79	0.259632	0.137139	1.89321	0.0583301	0.130563
CG6961	866.892	0.259628	0.0900518	2.8831	0.00393787	0.014556
Sirt4	139.077	0.259462	0.211824	1.22489	0.220615	0.358099
Pmp70	1484.49	0.259339	0.116843	2.21955	0.0264495	0.070406
csul	1070.91	0.259276	0.0826926	3.13542	0.00171607	0.00728203
Hsc70-4	44039	0.2591	0.0741497	3.49428	0.000475346	0.00242094
RpL6	6275.59	0.259017	0.0622591	4.16031	3.17819e-05	0.00022817
CG11089	2160.09	0.258989	0.115552	2.24131	0.0250058	0.0673399
CG12106	246.374	0.258906	0.15372	1.68427	0.0921287	0.186684
CG31198	7.9028	0.258484	0.413474	0.625151	0.531872	0.665315
pwn	71.2138	0.258114	0.282396	0.914016	0.360709	0.509026
Arp8	1144.65	0.257828	0.0827003	3.11762	0.00182318	0.00764945
CG4882	838.555	0.257731	0.10541	2.44504	0.0144834	0.0432184
Orc4	873.344	0.257591	0.126676	2.03346	0.0420061	0.101098
Rab32	1723.74	0.257574	0.1297	1.98592	0.0470419	0.110636
PPP1R15	1442.66	0.257547	0.073854	3.48724	0.000488025	0.00247252
CG6218	235.317	0.257498	0.161393	1.59548	0.110606	0.214056
CG12253	323.677	0.257475	0.166469	1.54669	0.121939	0.231174
alpha-Est1	581.93	0.257369	0.148621	1.73172	0.0833241	0.173003
CG11961	93.1453	0.257273	0.199889	1.28708	0.198066	0.331376
dnd	7.21335	0.257212	0.409848	0.62758	0.530279	0.664185
lncRNA:CR44766	38.4836	0.257203	0.320614	0.80222	0.422426	0.567371
lncRNA:CR46085	4.20257	0.256833	0.39164	0.655789	0.51196	0.647347
asRNA:CR43971	11.5909	0.256289	0.415452	0.616892	0.537306	0.669697
Trs20	121.131	0.256266	0.234037	1.09498	0.273527	0.417681
l(2)dtl	2135.28	0.25622	0.110376	2.32134	0.0202687	0.0568087
GPHR	568.284	0.255976	0.173273	1.4773	0.139596	0.255181
Taf8	354.665	0.255973	0.117299	2.18224	0.0290918	0.0758972
KrT95D	1308.21	0.255825	0.109802	2.32988	0.0198126	0.0557723
elg1	3649.08	0.255775	0.124058	2.06173	0.0392334	0.0957432
RasGAP1	2575.03	0.255683	0.0730732	3.499	0.000467013	0.00238854
CG3631	347.146	0.255676	0.121187	2.10976	0.0348793	0.0874418
Atg4b	913.253	0.255356	0.135003	1.89148	0.0585601	0.130926
Ntan1	489.493	0.255091	0.108412	2.35299	0.0186233	0.0530205
CG6766	1377.9	0.255049	0.125624	2.03026	0.0423306	0.101627
ihog	822.846	0.255038	0.13782	1.85051	0.0642395	0.141213
CG4842	351.718	0.25459	0.143084	1.7793	0.0751911	0.159954
Shc	500.202	0.254481	0.113859	2.23507	0.025413	0.0681335
CG32276	1633.11	0.254266	0.0803654	3.16387	0.00155684	0.00670319
Ipk2	666.518	0.253951	0.0968024	2.62339	0.00870583	0.0283429
Pfk	1842.44	0.25393	0.0825005	3.07792	0.00208453	0.00854982
sigmar	1115.85	0.253858	0.108652	2.33644	0.0194683	0.055091
CG1662	633.564	0.253832	0.139411	1.82074	0.0686457	0.14884
eIF4A	16140.8	0.25367	0.070983	3.57367	0.000352016	0.00186945
CG5946	541.329	0.25362	0.106374	2.38424	0.0171145	0.0494999
CG5541	1624.43	0.253604	0.0774502	3.27441	0.00105882	0.00483374
CG8272	857.948	0.253376	0.106918	2.36981	0.0177974	0.0511545
CG8728	1085.66	0.253363	0.09582	2.64415	0.0081896	0.0269374
tum	2311.87	0.253347	0.0850993	2.97707	0.00291017	0.0113047
Ctl1	613.125	0.253268	0.121729	2.08059	0.0374715	0.0922464
CG9747	740.661	0.253054	0.213106	1.18745	0.235048	0.374932
Corin	1.05644	0.252885	0.281391	0.898697	0.368814	NA
yellow-e	0.826295	0.252797	0.252926	0.999489	0.317558	NA
mh	358.763	0.252602	0.187474	1.3474	0.177852	0.306008
CycT	2637.4	0.252503	0.170292	1.48277	0.138136	0.253036
CG5194	932.349	0.252239	0.118202	2.13396	0.0328459	0.0832588
twin	3474.28	0.252152	0.0800757	3.14892	0.00163873	0.007006
Vha26	4801.27	0.252047	0.0631286	3.9926	6.53519e-05	0.000427389
dind	771.463	0.251972	0.0950604	2.65065	0.00803375	0.0265654
CG8924	1492.21	0.251504	0.120103	2.09408	0.0362532	0.0898406
Liprin-beta	2018.35	0.251499	0.0720185	3.49215	0.000479148	0.00243519
CG5510	678.733	0.251237	0.100287	2.50517	0.0122391	0.0376458
CG8414	1384.46	0.251128	0.132908	1.88949	0.0588258	0.131399
lncRNA:CR45596	1.76764	0.250671	0.342668	0.731527	0.464457	0.604962
trus	447.015	0.250634	0.113578	2.20671	0.0273345	0.0721578
CG34219	4.26991	0.250569	0.400195	0.626117	0.531238	0.665043
CG12811	319.642	0.250506	0.130425	1.92069	0.0547706	0.12458
ABCB7	957.267	0.250461	0.10419	2.4039	0.0162214	0.0474262
CG10268	223.941	0.250418	0.147467	1.69813	0.0894834	0.183201
unc-104	1087.28	0.250398	0.0856167	2.92464	0.00344856	0.0130765
fzy	1638.6	0.250276	0.119379	2.09648	0.0360397	0.0894487
CG3038	606.164	0.250029	0.0927815	2.69482	0.00704274	0.0237834
CG10795	426.691	0.24986	0.16209	1.54148	0.123199	0.232757
asRNA:CR43981	0.81582	0.249514	0.308258	0.809431	0.418267	NA
DnaJ-H	932.361	0.249478	0.0935635	2.6664	0.00766683	0.0255438
rush	731.664	0.249075	0.123187	2.02192	0.0431841	0.103267
Su(dx)	2879.84	0.248973	0.0913081	2.72674	0.00639643	0.021935
mus81	925.902	0.248877	0.115699	2.15108	0.0314702	0.0806049
CG3376	719.887	0.248833	0.11597	2.14568	0.0318988	0.081423
UGP	1784.05	0.248686	0.103177	2.41029	0.0159397	0.0467578
Tom70	1369.89	0.248486	0.159768	1.55529	0.119876	0.228124
Bap60	2504.3	0.248198	0.088619	2.80073	0.00509866	0.0181185
Pp2B-14D	1926.67	0.248164	0.110646	2.24287	0.0249054	0.0671253
CG12121	1873.57	0.248162	0.0855339	2.90133	0.00371581	0.0139264
CG6928	708.292	0.247968	0.112275	2.20858	0.027204	0.0719207
CG31342	3178.42	0.247782	0.112837	2.19593	0.0280972	0.0738488
eIF2Bdelta	1255.31	0.247732	0.0921432	2.68856	0.00717617	0.0241582
CCT4	2778.99	0.2477	0.0913999	2.71007	0.00672695	0.0228603
Eip78C	32.4103	0.247484	0.310126	0.798011	0.424864	0.569778
eIF3h	2780.81	0.247377	0.0799432	3.09441	0.00197207	0.00816459
CG5861	613.06	0.247269	0.130558	1.89393	0.058234	0.130408
Spred	1130.57	0.247187	0.0761397	3.24649	0.00116839	0.00528914
CG6574	286.546	0.247039	0.155987	1.58372	0.113259	0.218274
CG17272	232.047	0.247005	0.148955	1.65825	0.0972667	0.194599
firl	10.8857	0.246738	0.402404	0.61316	0.539771	0.671819
sip3	500.794	0.246672	0.128621	1.91782	0.0551339	0.12523
Ns3	1242.03	0.246531	0.11235	2.19432	0.0282128	0.0740422
Pp2A-29B	3809.3	0.246443	0.157204	1.56766	0.11696	0.223629
CG14131	305.798	0.24627	0.189321	1.30081	0.193323	0.325576
RpIII128	771.755	0.246163	0.107536	2.28913	0.0220716	0.0607721
Cul1	7725.07	0.246082	0.089477	2.75023	0.00595537	0.0206811
insv	738.988	0.24597	0.120912	2.03429	0.0419219	0.100971
CG10137	42.6267	0.245862	0.312393	0.787029	0.431265	0.575257
CG4133	0.994627	0.245464	0.287815	0.852855	0.39374	NA
Rep	387.165	0.245226	0.113185	2.16661	0.0302648	0.0782439
Pld	2345.72	0.244993	0.0772315	3.17219	0.00151294	0.00655203
CG34015	212.435	0.244706	0.191732	1.27629	0.201853	0.33619
CG5704	395.048	0.24469	0.141643	1.72751	0.0840753	0.174228
CG2694	1727.13	0.244432	0.0933443	2.61861	0.00882884	0.0286856
Syx5	871.314	0.244369	0.0968682	2.5227	0.0116458	0.0361534
CG10431	186.53	0.244358	0.167653	1.45752	0.144973	0.26268
CG10738	473.834	0.244354	0.167894	1.4554	0.145557	0.263346
Hayan	159.556	0.244083	0.191415	1.27515	0.202255	0.336524
lncRNA:CR44619	1.58609	0.243986	0.340992	0.715518	0.474289	0.613808
CG14431	4.29841	0.243696	0.395225	0.616599	0.537499	0.669766
spas	2021.35	0.243643	0.0807611	3.01684	0.00255427	0.0101293
Hex-A	1466.9	0.243038	0.143248	1.69663	0.0897674	0.18355
mge	1285	0.242834	0.0814986	2.97961	0.00288611	0.0112293
CG2202	1084.14	0.242795	0.189705	1.27986	0.200595	0.334452
mus308	1427.13	0.242692	0.0870458	2.78809	0.00530192	0.0187199
tgo	1543	0.242223	0.113887	2.12687	0.0334308	0.0842902
MEP-1	125.977	0.242159	0.251097	0.964402	0.334844	0.48347
CG9581	615.359	0.242154	0.0933826	2.59313	0.00951055	0.0304513
Zmynd10	2.24255	0.2421	0.372383	0.650138	0.515603	0.650935
Charon	389.882	0.242091	0.128326	1.88653	0.0592233	0.132165
CG7488	195.795	0.241996	0.172536	1.40259	0.16074	0.283408
asRNA:CR44367	9.94835	0.241969	0.406771	0.594853	0.551942	0.682672
rb	2962.49	0.241877	0.0623576	3.87887	0.000104945	0.00064992
Cpsf100	593.894	0.241664	0.123393	1.9585	0.0501719	0.116387
Rtca	844.854	0.241465	0.158869	1.5199	0.128535	0.240356
CG8370	2252.84	0.241445	0.101924	2.36886	0.0178429	0.0512243
CG32625	130.366	0.241215	0.214671	1.12365	0.261161	0.403825
CG30496	338.364	0.24119	0.144823	1.66541	0.0958302	0.192854
PPP4R2r	671.427	0.241103	0.177119	1.36125	0.173435	0.300328
CG10959	328.477	0.240982	0.13163	1.83075	0.0671377	0.14629
eIF3d1	4098.15	0.24097	0.0775564	3.10703	0.00188977	0.00786764
ebi	3358.99	0.240948	0.103271	2.33316	0.0196397	0.055495
phtf	1075.23	0.240574	0.0821031	2.93014	0.00338806	0.0128672
Brd8	444.763	0.240335	0.132814	1.80955	0.0703655	0.151889
CG7800	118.024	0.240234	0.212988	1.12792	0.259352	0.401797
Spx	447.29	0.239888	0.138665	1.72999	0.0836319	0.17353
CG11367	498.221	0.239639	0.113942	2.10317	0.0354507	0.0884652
mi	2997.11	0.239621	0.103992	2.30422	0.0212105	0.0589031
CG11407	2.23857	0.239322	0.371049	0.644987	0.518936	0.654375
CG15922	80.2845	0.239289	0.319924	0.747955	0.454488	0.5959
Dis3l2	2127.62	0.238873	0.111234	2.14748	0.0317553	0.0811208
EndoU	374.802	0.238859	0.1713	1.39439	0.1632	0.286248
CG8004	393.789	0.238727	0.133229	1.79186	0.073156	0.156484
Hmgs	2170.33	0.23863	0.139678	1.70843	0.0875571	0.180247
vimar	1625.38	0.238198	0.0994337	2.39554	0.0165958	0.0482734
mfrn	1454.22	0.237954	0.064331	3.6989	0.000216533	0.00122335
AgmNAT	27.5718	0.237877	0.334825	0.710451	0.477425	0.616549
CG33128	3.69234	0.237635	0.392195	0.605909	0.544575	0.676277
hpo	1130.13	0.237623	0.0883423	2.68979	0.00714961	0.0240855
Sik3	2383.61	0.237345	0.0905482	2.6212	0.00876203	0.0285068
CG9515	203.28	0.237339	0.183222	1.29537	0.195194	0.327855
CG6650	610.226	0.23729	0.0982033	2.41631	0.0156786	0.0461877
Fadd	96.2211	0.237198	0.278428	0.851919	0.394259	0.541618
Pp2C1	2828.74	0.237001	0.135272	1.75203	0.0797682	0.167413
CG9175	448.005	0.236537	0.122808	1.92607	0.0540959	0.123422
CG10165	150.555	0.236377	0.246375	0.95942	0.337347	0.485531
Arc2	70.4398	0.236317	0.265182	0.891149	0.37285	0.521602
TTLL15	307.197	0.236248	0.13984	1.68942	0.0911381	0.185245
ValRS-m	549.048	0.23616	0.103288	2.28642	0.0222298	0.061173
CG11964	782.48	0.236135	0.0917392	2.57398	0.0100535	0.0318999
Sply	1257.07	0.235913	0.0900615	2.61947	0.0088066	0.0286229
Ts	338.775	0.235819	0.124253	1.89789	0.0577107	0.129549
rux	292.737	0.235738	0.157784	1.49405	0.135161	0.249426
Hacd2	418.446	0.235595	0.116078	2.02962	0.0423954	0.101707
Pdss2	663.303	0.235221	0.104427	2.25249	0.0242914	0.065708
CG5849	1.45247	0.235105	0.325235	0.722877	0.469756	0.610059
mod(mdg4)	3341.87	0.23476	0.141334	1.66103	0.0967079	0.193901
Nmd3	1083.03	0.234726	0.0924228	2.53969	0.011095	0.0346098
CG18659	1597.14	0.234409	0.128006	1.83124	0.0670651	0.146198
Xpc	4060.46	0.234344	0.100949	2.3214	0.020265	0.0568087
Snx3	600.972	0.234244	0.121005	1.93583	0.0528891	0.12147
CG3638	2064.61	0.234017	0.143807	1.6273	0.103674	0.203832
CG16972	1611.93	0.233882	0.15063	1.55269	0.120498	0.229038
x16	1868.2	0.233838	0.0962515	2.42945	0.0151219	0.0448612
CG11178	965.537	0.233587	0.101051	2.31158	0.020801	0.0579487
CG8112	687.186	0.233544	0.107197	2.17864	0.0293581	0.0765189
CG9360	5.04802	0.233441	0.406669	0.574033	0.565946	0.693532
[truncated: 15,138 more rows]
