# Supplementary material
Source: HighWire-hosted journal article supplement (doi:10.1101/rna.080311.124)
Supplement: Supplemental_File_S2.xlsx [file Supplemental_File_S2.xlsx]

## Sheet: 5SS
chr_location	chr	geneID_location_SpliceSiteType	geneID	location	SpliceSiteType	geneSymbol	5or3SS	strandinformation	SSun_w1118_a	SSun_w1118_b	SSun_w1118_c	SSun_Het_a	SSun_Het_b	SSun_Het_c	SSun_Homo_a	SSun_Homo_b	SSun_Homo_c	SSun_HomoRescue_a	SSun_HomoRescue_b	SSun_HomoRescue_c	SSun_w1118_AV	SSun_Het_AV	SSun_Homo_AV	SSun_HomoRescue_AV	SSun_w1118_SD	SSun_Het_SD	SSun_Homo_SD	SSun_HomoRescue_SD	pValtype2_w1118_Het	pValtype2_w1118_Homo	pValtype2_w1118_HomoRescue	pValtype2_Het_Homo	pValtype2_Het_HomoRescue	pValtype2_Homo_HomoRescue
2L:16743570	2L	FBgn0032600:16743570:1	FBgn0032600	16743570	1	BuGZ	5	+	0.0113507	0.00971589	0.00759421	0.0111917	0.0160926	0.0136403	0.203287	0.192767	0.184725	0.00798234	0.0173697	0.00769259	0.00955361	0.0136415	0.193593	0.0110149	0.00188351	0.00245044	0.00930831	0.00550533	0.083772	4.69933e-06	0.686019	5.42267e-06	0.492278	8.14249e-06
2L:6681943	2L	FBgn0028703:6681943:-1	FBgn0028703	6681943	-1	Nhe3	5	-	0.014658	0.0103656	0.0140394	0.0172222	0.020708	0.0204966	0.669754	0.856678	0.809446	0.0150133	0.0263368	0.024359	0.013021	0.0194756	0.778626	0.021903	0.00232032	0.00195437	0.0971984	0.00604803	0.0211084	0.000167346	0.0764138	0.00017295	0.544457	0.000176334
2R:11220621	2R	FBgn0037084:11220621:1	FBgn0037084	11220621	1	Syx6	5	+	0.0244444	0.0153846	0.0269136	0.0130268	0.0143341	0.0120732	0.563952	0.606961	0.603108	0.0137736	0.0221075	0.0180202	0.0222475	0.0131447	0.59134	0.0179671	0.00607034	0.00113502	0.0237971	0.00416721	0.0630997	2.30268e-06	0.370945	1.91444e-06	0.125249	2.09304e-06
2R:18820838	2R	FBgn0010551:18820838:1	FBgn0010551	18820838	1	Phb2	5	+	0.00178571	0.00532458	0.00540392	0.0032653	0.00358584	0.00400439	0.0148671	0.0165709	0.0130638	0.00382043	0.00543237	0.00259291	0.00417141	0.00361851	0.0148339	0.00394857	0.00206645	0.000370624	0.00175375	0.00142406	0.671953	0.00242457	0.885218	0.000411351	0.717439	0.00112674
2R:6765536	2R	FBgn0085421:6765536:-1	FBgn0085421	6765536	-1	Epac	5	-	0.181818	0.0363636	0.0938942	0.105195	0.0363636	0.0730736	1.0094	0.907018	1.02604	0.114496	0.135198	0.0891656	0.104025	0.071544	0.980821	0.112953	0.0732546	0.0344411	0.0644551	0.023055	0.525307	9.94934e-05	0.850243	2.74223e-05	0.158582	2.54518e-05
3L:8045946	3L	FBgn0011817:8045946:1	FBgn0011817	8045946	1	nmo	5	+	0.00677966	0.0201115	0.00945681	0.0117458	0.00933293	0.0106294	0.515094	0.534947	0.634077	0.0212641	0.0190114	0.0279764	0.012116	0.0105693	0.561373	0.0227507	0.0070525	0.00120754	0.0637411	0.00466371	0.727113	0.00012023	0.0948974	0.00011617	0.0118787	0.000128121
3L:9728614	3L	FBgn0036039:9728614:1	FBgn0036039	9728614	1	Naa60	5	+	0.0744048	0.0336932	0.0352849	0.0295577	0.0634395	0.0348351	0.920603	0.926084	0.89218	0.0415955	0.0424089	0.036075	0.0477943	0.0426108	0.912956	0.0400265	0.0230591	0.0182302	0.0181997	0.00344614	0.775271	8.83849e-07	0.594819	5.10585e-07	0.821215	1.35024e-07
3R:17002151	3R	FBgn0266917:17002151:-1	FBgn0266917	17002151	-1	Sf3a1	5	-	0.0215311	0.0172471	0.0242563	0.0156971	0.00849126	0.0113465	0.200496	0.156946	0.242685	0.00976907	0.0189767	0.0150871	0.0210115	0.011845	0.200042	0.014611	0.00353335	0.0036287	0.0428713	0.00462225	0.0350241	0.00196329	0.129422	0.0016274	0.460683	0.00173547
3R:25070050	3R	FBgn0039271:25070050:1	FBgn0039271	25070050	1	CG11839	5	+	0.0175439	0.0244585	0.0350122	0.0373496	0.0311964	0.0323661	0.642684	0.691554	0.655763	0.0299833	0.0339927	0.018386	0.0256715	0.0336374	0.663334	0.027454	0.00879709	0.00326765	0.0252993	0.00810496	0.215445	2.06738e-06	0.80906	1.78898e-06	0.287592	2.02312e-06
3R:26964118	3R	FBgn0039465:26964118:-1	FBgn0039465	26964118	-1	Tsp97E	5	-	0.0112219	0.0130017	0.0125696	0.0104465	0.010302	0.00728947	0.29628	0.294621	0.315437	0.00485566	0.00633402	0.00981939	0.0122644	0.00934602	0.302112	0.00700302	0.000928307	0.00178249	0.0115691	0.00254859	0.0656938	1.70787e-06	0.0283111	1.69769e-06	0.261949	1.72497e-06
3R:9012837	3R	FBgn0037655:9012837:-1	FBgn0037655	9012837	-1	Kcmf1	5	-	0.00981461	0.0133925	0.0279778	0.0100276	0.00805055	0.00981983	0.174522	0.114536	0.109957	0.0181963	0.00789217	0.00658641	0.0170616	0.00929932	0.133005	0.0108916	0.00962145	0.00108644	0.0360274	0.00635961	0.237292	0.0057481	0.406579	0.00401682	0.691043	0.0044466
X:12019325	X	FBgn0030364:12019325:1	FBgn0030364	12019325	1	Lsm12a	5	+	0.0103595	0.0089527	0.0080055	0.0115092	0.00664398	0.00986623	0.474015	0.828403	0.725335	0.0115307	0.0109298	0.00944596	0.00910591	0.00933982	0.675918	0.0106355	0.00118447	0.00247498	0.182289	0.00107307	0.88976	0.00317749	0.172737	0.00318245	0.452239	0.00320453
X:17625530	X	FBgn0030850:17625530:-1	FBgn0030850	17625530	-1	stas	5	-	0.0297376	0.0163628	0.0126816	0.0240781	0.0124182	0.016731	0.755451	0.833666	0.847148	0.0200121	0.0195271	0.0170555	0.019594	0.0177424	0.812088	0.0188649	0.00897539	0.00589535	0.0495107	0.00158566	0.78008	1.0738e-05	0.896497	1.02589e-05	0.766071	1.00521e-05
X:9338053	X	FBgn0085478:9338053:-1	FBgn0085478	9338053	-1	Zdhhc8	5	-	0.0194175	0.00970874	0.00970874	0.00970874	0.00970874	0.0155512	0.0341001	0.0588453	0.0867742	0.015937	0.020962	0.00970874	0.012945	0.0116562	0.0599066	0.0155359	0.00560534	0.00337313	0.0263531	0.00563736	0.750114	0.0392016	0.602569	0.0346609	0.364185	0.0463145

## Sheet: 3SS
chr_location	chr	geneID_location_SpliceSiteType	geneID	location	SpliceSiteType	geneSymbol	5or3SS	strandinformation	SSun_w1118_a	SSun_w1118_b	SSun_w1118_c	SSun_Het_a	SSun_Het_b	SSun_Het_c	SSun_Homo_a	SSun_Homo_b	SSun_Homo_c	SSun_HomoRescue_a	SSun_HomoRescue_b	SSun_HomoRescue_c	SSun_w1118_AV	SSun_Het_AV	SSun_Homo_AV	SSun_HomoRescue_AV	SSun_w1118_SD	SSun_Het_SD	SSun_Homo_SD	SSun_HomoRescue_SD	pValtype2_w1118_Het	pValtype2_w1118_Homo	pValtype2_w1118_HomoRescue	pValtype2_Het_Homo	pValtype2_Het_HomoRescue	pValtype2_Homo_HomoRescue
2L:16743760	2L	FBgn0032600:16743760:-1	FBgn0032600	16743760	-1	BuGZ	3	+	0.0121723	0.00937225	0.00986478	0.0161502	0.00807863	0.00901064	0.187999	0.221263	0.215345	0.0165283	0.0111317	0.0142229	0.0104698	0.0110798	0.208202	0.013961	0.00149484	0.00441571	0.0177451	0.00270781	0.831807	4.30792e-05	0.122249	4.84402e-05	0.389895	4.7715e-05
2L:6681772	2L	FBgn0028703:6681772:1	FBgn0028703	6681772	1	Nhe3	3	-	0.0214521	0.0090332	0.0157591	0.0269016	0.0140871	0.0131686	0.733124	0.963975	0.901964	0.0138103	0.0139521	0.0151501	0.0154148	0.0180525	0.866354	0.0143042	0.00621663	0.00767733	0.119474	0.000736028	0.667785	0.000249412	0.773957	0.000253162	0.447299	0.00024685
2R:11220928	2R	FBgn0037084:11220928:-1	FBgn0037084	11220928	-1	Syx6	3	+	0.0720165	0.0495947	0.0438815	0.0794685	0.053447	0.0491371	0.844958	0.839495	0.851742	0.0733082	0.0372111	0.0482786	0.0551642	0.0606842	0.845398	0.0529326	0.0148714	0.0164098	0.00613559	0.0184931	0.688195	1.14401e-07	0.878513	1.65443e-07	0.615947	2.43304e-07
2R:18821041	2R	FBgn0010551:18821041:-1	FBgn0010551	18821041	-1	Phb2	3	+	0.00503637	0.00233228	0.00340332	0.00314882	0.0032191	0.00532122	0.0412429	0.0278947	0.0316613	0.00348879	0.00436941	0.0076247	0.00359066	0.00389638	0.0335996	0.00516097	0.00136174	0.00123445	0.00688195	0.00217862	0.78758	0.00177061	0.349455	0.0018171	0.431105	0.00241167
2R:6764736	2R	FBgn0085421:6764736:1	FBgn0085421	6764736	1	Epac	3	-	0.0869565	0.0434783	0.0577547	0.0897616	0.0795734	0.0521739	0.867559	0.854005	0.948986	0.0434783	0.113468	0.0890269	0.0627298	0.0738363	0.890183	0.0819909	0.022162	0.0194395	0.0513735	0.0355212	0.549647	1.37954e-05	0.470173	1.35283e-05	0.744818	2.34671e-05
3L:8046570	3L	FBgn0011817:8046570:-1	FBgn0011817	8046570	-1	nmo	3	+	0.0118343	0.015784	0.0146564	0.0182151	0.00591716	0.0121108	0.458314	0.487665	0.493276	0.0216685	0.0241016	0.0211716	0.0140916	0.012081	0.479752	0.0223139	0.00203451	0.00614902	0.0187762	0.001568	0.619331	1.7973e-06	0.00517559	2.11521e-06	0.0491608	1.91168e-06
3L:9728713	3L	FBgn0036039:9728713:-1	FBgn0036039	9728713	-1	Naa60	3	+	0.0843373	0.0447717	0.0401606	0.0407703	0.0499009	0.0337975	0.889781	1.02272	1.00539	0.0547998	0.0333052	0.0511612	0.0564232	0.0414896	0.97263	0.0464221	0.024284	0.00807575	0.0722699	0.0115043	0.369326	3.14797e-05	0.554264	2.44677e-05	0.576131	2.56236e-05
3R:17002028	3R	FBgn0266917:17002028:1	FBgn0266917	17002028	1	Sf3a1	3	-	0.0204082	0.0237036	0.0215283	0.0160014	0.0103499	0.0106453	0.290525	0.209874	0.370664	0.0278827	0.0232725	0.0210478	0.02188	0.0123322	0.290354	0.0240677	0.00167564	0.00318109	0.0803948	0.00348616	0.0100343	0.00444236	0.382746	0.00391804	0.0125758	0.00458867
3R:25070203	3R	FBgn0039271:25070203:-1	FBgn0039271	25070203	-1	CG11839	3	+	0.028169	0.0200897	0.0195934	0.0193662	0.00753919	0.0154123	0.510819	0.501761	0.385257	0.0325307	0.0165592	0.0188221	0.0226173	0.0141059	0.465946	0.0226373	0.00481428	0.00602076	0.0700252	0.00864229	0.128394	0.000396558	0.997375	0.000370159	0.233286	0.000404737
3R:26963520	3R	FBgn0039465:26963520:1	FBgn0039465	26963520	1	Tsp97E	3	-	0.0157068	0.00919448	0.0167187	0.017214	0.00628712	0.0095413	0.252924	0.283874	0.244199	0.00536178	0.00684617	0.0231556	0.0138733	0.0110141	0.260332	0.0117878	0.00408348	0.00561037	0.0208493	0.00987268	0.514859	3.62122e-05	0.75229	3.6879e-05	0.911747	4.85416e-05
3R:9012305	3R	FBgn0037655:9012305:1	FBgn0037655	9012305	1	Kcmf1	3	-	0.0274841	0.00654593	0.00920574	0.0157217	0.0116088	0.0150737	0.228486	0.151601	0.179768	0.0186793	0.0141466	0.0171847	0.0144119	0.0141347	0.186619	0.0166702	0.0113987	0.00221139	0.0388976	0.00230978	0.968999	0.00181676	0.753539	0.00155491	0.241595	0.00164545
X:12019628	X	FBgn0030364:12019628:-1	FBgn0030364	12019628	-1	Lsm12a	3	+	0.0184957	0.0175706	0.0235847	0.0472534	0.0229339	0.0219771	0.742494	0.932599	0.963681	0.0270818	0.0335778	0.0291744	0.0198837	0.0307215	0.879591	0.0299447	0.00323842	0.0143251	0.119743	0.0033158	0.270327	0.000240785	0.0197781	0.000259807	0.931491	0.000252158
X:17624205	X	FBgn0030850:17624205:1	FBgn0030850	17624205	1	stas	3	-	0.0188104	0.0148019	0.0210561	0.0238659	0.0116054	0.0176051	0.579571	0.760425	0.812987	0.0196706	0.0260211	0.0260368	0.0182228	0.0176921	0.717661	0.0239095	0.00316823	0.00613069	0.122443	0.00367103	0.900469	0.000586401	0.112057	0.000586761	0.20628	0.000605481
X:9337892	X	FBgn0085478:9337892:1	FBgn0085478	9337892	1	Zdhhc8	3	-	0.0108108	0.0108108	0.0108108	0.0174275	0.0108108	0.0108108	0.0932432	0.117528	0.143559	0.0266126	0.0223578	0.0157568	0.0108108	0.0130164	0.11811	0.0215757	0	0.00382013	0.025163	0.00546999	0.373901	0.00179173	0.0270608	0.00202235	0.0904072	0.00290135
