# Supplementary material
Source: HighWire-hosted journal article supplement (doi:10.1101/rna.080311.124)
Supplement: Supplemental_File_S3.xlsx [file Supplemental_File_S3.xlsx]

## Sheet: 5'SS
chr_location	chr	geneID_location_SpliceSiteType	geneID	location	SpliceSiteType	geneSymbol	5or3SS	strandinformation	SSun_w1118_a	SSun_w1118_b	SSun_w1118_c	SSun_Het_a	SSun_Het_b	SSun_Het_c	SSun_Homo_a	SSun_Homo_b	SSun_Homo_c	SSun_HomoRescue_a	SSun_HomoRescue_b	SSun_HomoRescue_c	SSun_w1118_AV	SSun_Het_AV	SSun_Homo_AV	SSun_HomoRescue_AV	SSun_w1118_SD	SSun_Het_SD	SSun_Homo_SD	SSun_HomoRescue_SD	pVal_w1118_Het	pVal_w1118_Homo	pVal_w1118_HomoRescue	pVal_Het_Homo	pVal_Het_HomoRescue	pVal_Homo_HomoRescue
2L:15770897	2L	FBgn0041627:15770897:-1	FBgn0041627	15770897	-1	Ku80	5	-	0.0238095	0.0139128	0.0279109	0.0204547	0.0179237	0.0272374	0.0484289	0.0354938	0.0369928	0.00793651	0.00793651	0.0240676	0.0218778	0.0218719	0.0403052	0.0133135	0.00719624	0.00481585	0.00707517	0.0093133	0.999132	0.0341094	0.28008	0.0253738	0.252372	0.0185206
2L:8186675	2L	FBgn0264953:8186675:1	FBgn0264953	8186675	1	Piezo	5	+	0.0350877	0.0350877	0.0350877	0.0350877	0.0350877	0.0350877	0.0570175	0.0692439	0.0641076	0.0449338	0.0470002	0.0350877	0.0350877	0.0350877	0.0634564	0.0423406	0	0	0.00613915	0.00636556	#DIV/0!	0.0152542	0.187161	0.0152542	0.187161	0.014467
2R:12870330	2R	FBgn0000181:12870330:1	FBgn0000181	12870330	1	bic	5	+	0.0339115	0.0367612	0.0395839	0.0298071	0.0300529	0.0367031	0.046523	0.0479136	0.0497934	0.0285586	0.0256267	0.0330324	0.0367522	0.0321877	0.0480767	0.0290725	0.00283621	0.00391235	0.00164128	0.00372951	0.184001	0.00771809	0.0508488	0.0103764	0.374778	0.00543096
2R:17412843	2R	FBgn0016697:17412843:1	FBgn0016697	17412843	1	Pros_5	5	+	0.0102605	0.00648413	0.0193704	0.00895859	0.0104063	0.0120164	0.0272537	0.0247512	0.0297857	0.011981	0.0142381	0.00621976	0.0120383	0.0104604	0.0272635	0.0108129	0.00662455	0.0015296	0.00251729	0.00413481	0.723243	0.0438837	0.801673	0.00145829	0.900087	0.00743029
2R:7931285	2R	FBgn0023171:7931285:-1	FBgn0023171	7931285	-1	rnh1	5	-	0.0310881	0.0352061	0.0125504	0.0336047	0.0283167	0.0155711	0.0712579	0.0468363	0.0520288	0.0207497	0.0195643	0.0239515	0.0262815	0.0258308	0.0567076	0.0214218	0.0120684	0.00927025	0.0128655	0.00226953	0.961706	0.0406468	0.559741	0.0323879	0.499694	0.0380515
2R:7455302	2R	FBgn0025885:7455302:-1	FBgn0025885	7455302	-1	Inos	5	-	0.00667408	0.00780777	0.0145845	0.00694789	0.0132346	0.00626973	0.0230358	0.0206338	0.0164351	0.0145429	0.00773118	0.0115304	0.00968879	0.00881742	0.0200349	0.0112682	0.00427755	0.00384042	0.00334083	0.00341343	0.80601	0.0325309	0.644638	0.0194972	0.45575	0.033584
2R:9122448	2R	FBgn0033381:9122448:1	FBgn0033381	9122448	1	GstE13	5	+	0.035533	0.0131759	0.0262447	0.0427219	0.0592552	0.0571361	0.200159	0.212352	0.336717	0.134048	0.00507614	0.0915913	0.0249846	0.0530377	0.249743	0.0769051	0.0112317	0.00899637	0.0755685	0.0657281	0.029946	0.0332796	0.303604	0.044101	0.594765	0.0413635
2R:13862104	2R	FBgn0033884:13862104:1	FBgn0033884	13862104	1	CG13344	5	+	0.0027137	0.00727794	0.00588473	0.00550332	0.00614474	0.0027137	0.00946353	0.013295	0.011036	0.0027137	0.0027137	0.00595165	0.00529212	0.00478725	0.0112648	0.00379302	0.00233911	0.00182416	0.00192596	0.00186943	0.783639	0.028491	0.437002	0.0134596	0.545747	0.00853157
2R:17063106	2R	FBgn0034187:17063106:1	FBgn0034187	17063106	1	Mov10	5	+	0.0347107	0.0356116	0.0282231	0.0233542	0.041324	0.0210511	0.0688778	0.0826647	0.0798675	0.0304609	0.039034	0.0312659	0.0328485	0.0285764	0.0771367	0.0335869	0.00403092	0.0110996	0.00728786	0.00473445	0.583051	0.00231092	0.847317	0.00514777	0.529144	0.00187693
2R:17733471	2R	FBgn0085224:17733471:1	FBgn0085224	17733471	1	CG34195	5	+	0.019656	0.004914	0.004914	0.0279028	0.0162957	0.0235331	0.0572036	0.0603027	0.0564101	0.0278868	0.0296751	0.0428392	0.00982801	0.0225772	0.0579721	0.0334671	0.00851131	0.00586229	0.00205695	0.00816566	0.108185	0.00750323	0.0256233	0.00469356	0.141105	0.0289476
2R:22814036	2R	FBgn0086408:22814036:1	FBgn0086408	22814036	1	stl	5	+	0.038961	0.025974	0.025974	0.0607607	0.025974	0.0500241	0.0800866	0.118112	0.0948445	0.025974	0.0424829	0.025974	0.030303	0.0455862	0.0976809	0.031477	0.00749805	0.0178129	0.0191705	0.00953143	0.274002	0.0158598	0.875406	0.0263252	0.311549	0.0135016
2R:21170540	2R	FBgn0261067:21170540:-1	FBgn0261067	21170540	-1	LSm1	5	-	0.01	0.0133912	0.00852999	0.0183991	0.012927	0.0147296	0.0412277	0.0396604	0.0440653	0.0239858	0.00695531	0.0102285	0.0106404	0.0153519	0.0416512	0.0137232	0.0024931	0.0027886	0.00223279	0.00903712	0.0954203	9.56321e-05	0.619667	0.000286454	0.789594	0.0273961
2R:18141416	2R	FBgn0265297:18141416:1	FBgn0265297	18141416	1	pAbp	5	+	0.00960699	0.0100013	0.021799	0.0157409	0.00973275	0.0189445	0.030439	0.0331383	0.0313592	0.0174902	0.0197009	0.0133039	0.0138024	0.0148061	0.0316455	0.0168317	0.00692802	0.0046765	0.00137224	0.00324894	0.846752	0.0422126	0.544697	0.0182039	0.574938	0.00764818
3L:15554222	3L	FBgn0087035:15554222:1	FBgn0087035	15554222	1	AGO2	5	+	0.0923567	0.110279	0.063311	0.0653386	0.105302	0.0735066	0.164447	0.169043	0.17581	0.0925517	0.0870119	0.114144	0.0886487	0.0813825	0.169767	0.0979026	0.0237023	0.0211139	0.00571571	0.0143358	0.712245	0.0222695	0.600092	0.0136308	0.332803	0.0064141
3L:20432707	3L	FBgn0284421:20432707:1	FBgn0284421	20432707	1	Psn	5	+	0.0356234	0.0236855	0.037557	0.0348282	0.0524658	0.0445892	0.0977657	0.125165	0.126689	0.0250964	0.0208456	0.0255124	0.0322887	0.0439611	0.11654	0.0238181	0.00751299	0.00883553	0.0162767	0.00258272	0.158105	0.00487839	0.181517	0.00598091	0.0490852	0.00880314
3R:32053555	3R	FBgn0002780:32053555:1	FBgn0002780	32053555	1	mod	5	+	0.00666667	0.0114826	0.0148148	0.0175451	0.0106453	0.0190452	0.0604929	0.0596799	0.0526237	0.0126977	0.0120021	0.0116849	0.010988	0.0157452	0.0575988	0.0121282	0.00409653	0.0044799	0.00432774	0.000518055	0.246737	0.00017503	0.678337	0.000313637	0.296244	0.00268203
3R:6380619	3R	FBgn0010282:6380619:1	FBgn0010282	6380619	1	TfIIF_	5	+	0.0209581	0.0213087	0.0148104	0.0210666	0.0315658	0.0377733	0.0427682	0.0498915	0.0531483	0.0135443	0.0221427	0.0150973	0.0190257	0.0301352	0.0486027	0.0169281	0.0036548	0.00844471	0.00530871	0.00458221	0.136787	0.00220594	0.570471	0.0417288	0.0951837	0.00157153
3R:23056042	3R	FBgn0039045:23056042:-1	FBgn0039045	23056042	-1	Ctns	5	-	0.046875	0.0209173	0.015625	0.03125	0.015625	0.021816	0.0739104	0.100886	0.104664	0.0225087	0.015625	0.0492788	0.0278058	0.022897	0.0931534	0.0291375	0.0167251	0.00786839	0.0167717	0.0177792	0.678395	0.0087846	0.929274	0.00848635	0.620189	0.0106085
3R:23056199	3R	FBgn0039045:23056199:-1	FBgn0039045	23056199	-1	Ctns	5	-	0.0327869	0.0143046	0.010929	0.0166461	0.0160273	0.010929	0.0664381	0.0645533	0.047426	0.0303225	0.010929	0.0226339	0.0193402	0.0145341	0.0594725	0.0212951	0.0117669	0.00313746	0.010475	0.00976585	0.557063	0.0119303	0.835946	0.012113	0.354332	0.0100168
3R:26964643	3R	FBgn0039465:26964643:-1	FBgn0039465	26964643	-1	Tsp97E	5	-	0.011399	0.0172728	0.0231343	0.0220943	0.0132178	0.0167646	0.0415799	0.0423312	0.0361066	0.0141648	0.00994263	0.0213665	0.0172687	0.0173589	0.0400059	0.015158	0.00586768	0.00446801	0.00339773	0.00577634	0.984181	0.00843474	0.680006	0.00283997	0.630877	0.00605882
3R:29934811	3R	FBgn0039726:29934811:-1	FBgn0039726	29934811	-1	eIF2B_	5	-	0.0065445	0.00641302	0.00877448	0.00518177	0.00500103	0.0026178	0.019638	0.0123416	0.0150007	0.00659937	0.0026178	0.0026178	0.007244	0.00426687	0.0156601	0.00394499	0.00132707	0.00143099	0.00369262	0.00229876	0.0577835	0.0457161	0.114757	0.0218864	0.848772	0.0145187
3R:5569971	3R	FBgn0041191:5569971:1	FBgn0041191	5569971	1	Rheb	5	+	0.0158451	0.0141243	0.0175397	0.0226442	0.0208526	0.0210502	0.0346315	0.02859	0.0285638	0.0210172	0.0164646	0.021944	0.0158364	0.0215157	0.0305951	0.0198086	0.00170772	0.000982344	0.00349567	0.00293284	0.0132963	0.00793038	0.129535	0.0378023	0.42385	0.0158495
3R:30647648	3R	FBgn0051015:30647648:-1	FBgn0051015	30647648	-1	PH4_PV	5	-	0.0198347	0.0189812	0.0125467	0.0154978	0.0211039	0.0102153	0.05665	0.0686064	0.0482019	0.0254898	0.0154978	0.0127981	0.0171209	0.0156056	0.0578194	0.0179285	0.00398429	0.00544511	0.0102524	0.00668588	0.718832	0.0118224	0.867948	0.00773244	0.666003	0.00753042
3R:11635701	3R	FBgn0262081:11635701:-1	FBgn0262081	11635701	-1	Csk	5	-	0.00512821	0.00512821	0.00734396	0.00512821	0.00847231	0.00512821	0.0122856	0.0127576	0.0121442	0.00760609	0.00512821	0.0091642	0.00586679	0.00624291	0.0123958	0.0072995	0.00127926	0.00193072	0.000321197	0.00203539	0.794447	0.00919361	0.370325	0.0285047	0.549871	0.0462252
X:1557659	X	FBgn0025390:1557659:-1	FBgn0025390	1557659	-1	Mur2B	5	-	0.00735895	0.00966507	0.00832677	0.00382833	0.00616049	0.00626596	0.0216952	0.0295694	0.0227436	0.00529425	0.00423975	0.0095247	0.00845027	0.00541826	0.0246694	0.0063529	0.001158	0.00137793	0.00427579	0.002797	0.0449149	0.0169346	0.325838	0.0102662	0.64044	0.00552681
X:1203879	X	FBgn0029568:1203879:1	FBgn0029568	1203879	1	CG11381	5	+	0.0697674	0.072093	0.0578915	0.088038	0.100295	0.0971602	0.283643	0.332895	0.300961	0.0772912	0.0587548	0.0569394	0.066584	0.0951644	0.305833	0.0643285	0.00761721	0.00636763	0.0249849	0.0112627	0.00819739	0.00184696	0.790001	0.00298064	0.0233047	0.000916593
X:4220128	X	FBgn0029697:4220128:1	FBgn0029697	4220128	1	CG15570	5	+	0.0015625	0.00288542	0.00418522	0.00354917	0.00105278	0.00106122	0.00640471	0.00841373	0.0101044	0.00208299	0.00161567	0.00147179	0.00287771	0.00188772	0.0083076	0.00172349	0.00131138	0.00143886	0.00185211	0.000319545	0.428572	0.0177482	0.264013	0.0104336	0.863352	0.0226984
X:8584255	X	FBgn0030052:8584255:1	FBgn0030052	8584255	1	CG12065	5	+	0.0167598	0.0111732	0.0111732	0.0111732	0.0111732	0.0111732	0.0301891	0.022539	0.0205906	0.0111732	0.0162182	0.0111732	0.0130354	0.0111732	0.0244396	0.0128549	0.00322542	0	0.00507364	0.00291275	0.42265	0.0387125	0.946134	0.045456	0.42265	0.0378165
X:11713755	X	FBgn0030328:11713755:-1	FBgn0030328	11713755	-1	Amun	5	-	0.0429043	0.043453	0.0592899	0.0376612	0.0472529	0.0454914	0.0946588	0.0798265	0.0875033	0.0659768	0.0480684	0.0681125	0.0485491	0.0434685	0.0873295	0.0607193	0.00930589	0.00510579	0.00741771	0.0110079	0.466026	0.00560483	0.219354	0.0018021	0.0960264	0.0315227
X:4242721	X	FBgn0041252:4242721:-1	FBgn0041252	4242721	-1	Femcoat	5	-	0.0129105	0.00993046	0.0144424	0.0109577	0.0195951	0.0181509	0.0255473	0.037474	0.0405008	0.0206676	0.0126904	0.00843418	0.0124278	0.0162346	0.0345074	0.0139308	0.00229438	0.00462658	0.00790587	0.00621033	0.293543	0.0319809	0.72484	0.0364294	0.635635	0.0261625
X:4248433	X	FBgn0262609:4248433:1	FBgn0262609	4248433	1	CG43135	5	+	0.0460526	0.0199609	0.0300348	0.051077	0.0367707	0.0616211	0.213891	0.169035	0.136695	0.0473268	0.0306254	0.0240976	0.0320161	0.0498229	0.173207	0.0340166	0.0131582	0.0124726	0.0387669	0.0119801	0.164337	0.016196	0.855185	0.022818	0.188695	0.0177831

## Sheet: 3'SS
chr_location	chr	geneID_location_SpliceSiteType	geneID	location	SpliceSiteType	geneSymbol	5or3SS	strandinformation	SSun_w1118_a	SSun_w1118_b	SSun_w1118_c	SSun_Het_a	SSun_Het_b	SSun_Het_c	SSun_Homo_a	SSun_Homo_b	SSun_Homo_c	SSun_HomoRescue_a	SSun_HomoRescue_b	SSun_HomoRescue_c	SSun_w1118_AV	SSun_Het_AV	SSun_Homo_AV	SSun_HomoRescue_AV	SSun_w1118_SD	SSun_Het_SD	SSun_Homo_SD	SSun_HomoRescue_SD	pVal_w1118_Het	pVal_w1118_Homo	pVal_w1118_HomoRescue	pVal_Het_Homo	pVal_Het_HomoRescue	pVal_Homo_HomoRescue
2L:15770841	2L	FBgn0041627:15770841:1	FBgn0041627	15770841	1	Ku80	3	-	0.0299145	0.0148419	0.0242844	0.0233448	0.0182355	0.0280638	0.0604803	0.0455722	0.0408269	0.00854701	0.00854701	0.0168091	0.0230136	0.0232147	0.0489598	0.011301	0.00761622	0.00491545	0.0102553	0.00477013	0.971486	0.027923	0.0996689	0.0319056	0.0394938	0.0121797
2L:8186738	2L	FBgn0264953:8186738:-1	FBgn0264953	8186738	-1	Piezo	3	+	0.0350877	0.0350877	0.0350877	0.0350877	0.0350877	0.0350877	0.0789474	0.0721997	0.0662139	0.0549828	0.0473018	0.0350877	0.0350877	0.0350877	0.0724537	0.0457908	0	0	0.00637052	0.0100333	#DIV/0!	0.00955037	0.205908	0.00955037	0.205908	0.0242227
2R:12870403	2R	FBgn0000181:12870403:-1	FBgn0000181	12870403	-1	bic	3	+	0.0278738	0.0294102	0.0308611	0.0272744	0.0256219	0.0294348	0.0406366	0.039933	0.0412266	0.0257625	0.0224686	0.0258902	0.0293817	0.0274437	0.0405987	0.0247071	0.00149387	0.00191206	0.000647637	0.00193967	0.242648	0.00197077	0.0326704	0.00356502	0.156805	0.00238064
2R:17412905	2R	FBgn0016697:17412905:-1	FBgn0016697	17412905	-1	Pros_5	3	+	0.013132	0.012178	0.0216889	0.0179954	0.0145939	0.020535	0.0365726	0.0356336	0.043471	0.0190777	0.0176876	0.0113305	0.0156663	0.0177081	0.0385591	0.0160319	0.00523748	0.00298096	0.00427965	0.00413045	0.596471	0.00476876	0.929165	0.0034335	0.602034	0.00280518
2R:7931224	2R	FBgn0023171:7931224:1	FBgn0023171	7931224	1	rnh1	3	-	0.0311615	0.0335629	0.011026	0.0410723	0.0257759	0.0186212	0.0719547	0.0497359	0.0667213	0.0216518	0.0205065	0.0319091	0.0252501	0.0284898	0.062804	0.0246892	0.0123768	0.0114689	0.0116158	0.00627886	0.756267	0.0187238	0.94864	0.0219523	0.648244	0.0144898
2R:7455231	2R	FBgn0025885:7455231:1	FBgn0025885	7455231	1	Inos	3	-	0.00764192	0.00754801	0.00991842	0.00575981	0.0128552	0.006071	0.0184345	0.0192498	0.0154497	0.0128457	0.0106755	0.012242	0.00836945	0.00822868	0.0177113	0.0119211	0.00134227	0.00400974	0.0020006	0.00112017	0.9584	0.00408373	0.0257759	0.0363665	0.247814	0.0200866
2R:5340512	2R	FBgn0033017:5340512:1	FBgn0033017	5340512	1	CG10465	3	-	0.0237581	0.029582	0.0288831	0.0206335	0.0308526	0.0257411	0.047274	0.0468517	0.0557994	0.0319594	0.0224521	0.0312362	0.0274077	0.0257424	0.049975	0.0285493	0.00317994	0.00510953	0.00504847	0.00529262	0.661329	0.00499811	0.768148	0.00427893	0.544867	0.00715424
2R:9122519	2R	FBgn0033381:9122519:-1	FBgn0033381	9122519	-1	GstE13	3	+	0.0321285	0.00966223	0.0233556	0.0443938	0.0542337	0.0375348	0.212478	0.280678	0.305829	0.150484	0.00401606	0.0662651	0.0217154	0.0453874	0.266328	0.0735885	0.0113226	0.00839372	0.0483018	0.0735082	0.0482506	0.00971289	0.345717	0.0135136	0.57548	0.0249998
2R:13862167	2R	FBgn0033884:13862167:-1	FBgn0033884	13862167	-1	CG13344	3	+	0.0020555	0.00462091	0.00579779	0.00554481	0.00560375	0.0020555	0.00750875	0.0102438	0.0103804	0.0020555	0.00415423	0.0046375	0.00415807	0.00440135	0.00937763	0.00361574	0.0019136	0.00203178	0.00161994	0.00137265	0.887327	0.0236977	0.712342	0.0316778	0.612363	0.00992572
2R:17063171	2R	FBgn0034187:17063171:-1	FBgn0034187	17063171	-1	Mov10	3	+	0.0406654	0.0292119	0.0290696	0.0261804	0.0367401	0.0205121	0.0745721	0.072938	0.0720448	0.0262934	0.0433507	0.0270477	0.0329823	0.0278109	0.073185	0.0322306	0.00665415	0.00823593	0.0012816	0.00963767	0.447169	0.00729216	0.917471	0.00948056	0.579262	0.0166056
2R:24525651	2R	FBgn0035016:24525651:1	FBgn0035016	24525651	1	CG4612	3	-	0.089141	0.0895409	0.0557838	0.0851999	0.0682192	0.0956006	0.120699	0.156342	0.136143	0.0709226	0.0699589	0.0609976	0.0781552	0.0830066	0.137728	0.067293	0.0193753	0.0138218	0.0178742	0.00547328	0.743649	0.0175464	0.436884	0.0156341	0.178031	0.0144813
2R:17733534	2R	FBgn0085224:17733534:-1	FBgn0085224	17733534	-1	CG34195	3	+	0.0282486	0.00564972	0.0101288	0.0378554	0.0205743	0.0291568	0.0668102	0.0595733	0.0652757	0.0322722	0.0343329	0.0456765	0.0146757	0.0291955	0.0638864	0.0374272	0.0119659	0.00864061	0.00381323	0.00721803	0.170636	0.0127761	0.060064	0.0101497	0.276118	0.0108235
2R:22814097	2R	FBgn0086408:22814097:-1	FBgn0086408	22814097	-1	stl	3	+	0.0506329	0.0253165	0.0378124	0.0628043	0.03965	0.0520201	0.0780021	0.110601	0.123769	0.0347794	0.0437067	0.0253165	0.0379206	0.0514915	0.104124	0.0346009	0.0126586	0.0115862	0.0235611	0.00919643	0.243142	0.0223215	0.733551	0.0421493	0.122746	0.0242365
2R:21170485	2R	FBgn0261067:21170485:1	FBgn0261067	21170485	1	LSm1	3	-	0.00686813	0.0102385	0.00600762	0.0109071	0.00966786	0.0101258	0.0304184	0.0270475	0.0307239	0.0159011	0.00482192	0.00688655	0.00770475	0.0102336	0.0293966	0.00920318	0.00223607	0.000626581	0.00204009	0.00589168	0.182473	0.000254206	0.712403	0.00191467	0.791118	0.0184078
2R:18141488	2R	FBgn0265297:18141488:-1	FBgn0265297	18141488	-1	pAbp	3	+	0.00374311	0.00430817	0.00656106	0.00458611	0.00302725	0.00711737	0.00951213	0.0125583	0.0102873	0.00544787	0.00691318	0.0054294	0.00487078	0.00491024	0.0107859	0.00593015	0.00149084	0.00206424	0.00158312	0.00085138	0.979988	0.0093116	0.359523	0.0196498	0.49328	0.0175502
3L:15554290	3L	FBgn0087035:15554290:-1	FBgn0087035	15554290	-1	AGO2	3	+	0.0765957	0.0775532	0.0577048	0.0525564	0.0806251	0.0569149	0.127881	0.123326	0.129202	0.0790157	0.0616309	0.0867855	0.0706179	0.0633655	0.126803	0.0758107	0.0111933	0.0151053	0.0030825	0.0128799	0.543516	0.00899625	0.626527	0.0153623	0.340006	0.0163653
3L:20432767	3L	FBgn0284421:20432767:-1	FBgn0284421	20432767	-1	Psn	3	+	0.0381356	0.0194398	0.0315185	0.0317797	0.0543143	0.0409742	0.0903454	0.112143	0.113954	0.0275641	0.0182869	0.0220585	0.0296979	0.0423561	0.105481	0.0226365	0.00947993	0.0113307	0.0131389	0.00466554	0.214107	0.00186894	0.333018	0.00348168	0.0786503	0.00416198
3R:32053623	3R	FBgn0002780:32053623:-1	FBgn0002780	32053623	-1	mod	3	+	0.0162507	0.0179198	0.0244877	0.0228529	0.0179775	0.0219364	0.0846916	0.0711528	0.0716019	0.0176112	0.0141388	0.0180689	0.0195527	0.0209223	0.0758154	0.0166063	0.00435451	0.00259108	0.00769029	0.00214914	0.669239	0.00125178	0.372376	0.00328278	0.0928547	0.00336934
3R:6380686	3R	FBgn0010282:6380686:-1	FBgn0010282	6380686	-1	TfIIF_	3	+	0.0227577	0.022033	0.0158695	0.0254046	0.0338437	0.0402033	0.0432006	0.0495213	0.0579344	0.0200939	0.0274976	0.0215968	0.02022	0.0331505	0.0502188	0.0230628	0.00378509	0.00742366	0.00739162	0.00391354	0.0752628	0.00839117	0.417008	0.0477328	0.127795	0.0107328
3R:23055971	3R	FBgn0039045:23055971:1	FBgn0039045	23055971	1	Ctns	3	-	0.0252101	0.0294931	0.0168067	0.0485226	0.0168067	0.0300931	0.10448	0.104025	0.125415	0.0168067	0.0168067	0.0573508	0.0238366	0.0318075	0.111307	0.0303214	0.00645374	0.0159273	0.0122203	0.0234081	0.487751	0.00154148	0.683766	0.00298855	0.932489	0.012866
3R:23056138	3R	FBgn0039045:23056138:1	FBgn0039045	23056138	1	Ctns	3	-	0.0352941	0.0193665	0.0117647	0.0117647	0.0117647	0.0117647	0.0601023	0.0634747	0.0643704	0.0329034	0.0117647	0.0247678	0.0221418	0.0117647	0.0626491	0.0231453	0.0120077	0	0.00225062	0.0106624	0.273115	0.0247819	0.919086	0.000651464	0.205742	0.0197496
3R:26964285	3R	FBgn0039465:26964285:1	FBgn0039465	26964285	1	Tsp97E	3	-	0.0232333	0.0117996	0.0231912	0.026161	0.0157767	0.0157433	0.0390263	0.0421179	0.0638507	0.0142218	0.0130504	0.0266162	0.019408	0.019227	0.0483317	0.0179628	0.00658911	0.006005	0.0135285	0.00751694	0.973643	0.0470681	0.8148	0.0479762	0.831639	0.0399023
3R:29934751	3R	FBgn0039726:29934751:1	FBgn0039726	29934751	1	eIF2B_	3	-	0.00648508	0.013229	0.0123606	0.0080369	0.00384863	0.00259403	0.023334	0.0266791	0.0197722	0.00875086	0.00384548	0.0039437	0.0106915	0.00482652	0.0232618	0.00551335	0.00366868	0.00285016	0.00345404	0.0028042	0.0982017	0.0125371	0.128926	0.0023367	0.780881	0.00267596
3R:5570028	3R	FBgn0041191:5570028:-1	FBgn0041191	5570028	-1	Rheb	3	+	0.0182868	0.0144756	0.0169054	0.0198851	0.0222938	0.0239644	0.0323935	0.0337996	0.033597	0.0223476	0.0147208	0.0165167	0.0165559	0.0220478	0.0332633	0.0178617	0.00192951	0.00205074	0.000760118	0.00398734	0.0279911	0.00160728	0.646114	0.00561553	0.204624	0.01868
3R:30647574	3R	FBgn0051015:30647574:1	FBgn0051015	30647574	1	PH4_PV	3	-	0.0271566	0.0259713	0.0159744	0.0296312	0.0366307	0.0210588	0.0620126	0.101471	0.0789754	0.0241294	0.0359258	0.0196905	0.0230341	0.0291069	0.0808198	0.0265819	0.00614251	0.00779919	0.019794	0.00839092	0.35214	0.0281923	0.589072	0.0321463	0.722147	0.0275343
3R:11635630	3R	FBgn0262081:11635630:1	FBgn0262081	11635630	1	Csk	3	-	0.00472813	0.00472813	0.00910295	0.00472813	0.0079543	0.00472813	0.013575	0.0125159	0.0136677	0.00722882	0.00472813	0.00898143	0.00618641	0.00580352	0.0132529	0.00697946	0.0025258	0.00186263	0.000639933	0.00213759	0.843824	0.0334835	0.699904	0.0128864	0.512947	0.028333
X:1557593	X	FBgn0025390:1557593:1	FBgn0025390	1557593	1	Mur2B	3	-	0.0099278	0.0107043	0.011134	0.00422933	0.00856207	0.00847679	0.0255298	0.0335864	0.026376	0.00819629	0.0085889	0.01039	0.0105887	0.0070894	0.0284974	0.0090584	0.000611341	0.00247726	0.0044275	0.00116979	0.127066	0.0182297	0.13773	0.00452398	0.305737	0.0124375
X:1203934	X	FBgn0029568:1203934:-1	FBgn0029568	1203934	-1	CG11381	3	+	0.0460993	0.042415	0.0346258	0.0442423	0.0610346	0.0543908	0.135917	0.169457	0.163391	0.049796	0.0378738	0.0336446	0.0410467	0.0532226	0.156255	0.0404381	0.00585786	0.00845687	0.0178726	0.00837548	0.118307	0.00433003	0.923374	0.00349623	0.136342	0.00256729
X:4220189	X	FBgn0029697:4220189:-1	FBgn0029697	4220189	-1	CG15570	3	+	0.00156372	0.00279845	0.0042199	0.00330259	0.00182898	0.00106557	0.00654312	0.00855788	0.00936716	0.00281538	0.00120454	0.00178008	0.00286069	0.00206572	0.00815605	0.00193333	0.00132918	0.00113715	0.00145427	0.000816278	0.476194	0.00980981	0.372203	0.00549994	0.878596	0.0064897
X:11713688	X	FBgn0030328:11713688:1	FBgn0030328	11713688	1	Amun	3	-	0.0534759	0.0564343	0.070765	0.0408964	0.0577008	0.0554682	0.102363	0.0905596	0.0955088	0.0773203	0.0612184	0.0758094	0.0602251	0.0513551	0.0961439	0.0714493	0.00924694	0.00912609	0.00592748	0.00889242	0.3025	0.00766562	0.204356	0.00358394	0.0524037	0.0210666
X:4242613	X	FBgn0041252:4242613:1	FBgn0041252	4242613	1	Femcoat	3	-	0.0228341	0.0236375	0.0287099	0.02747	0.0392804	0.030401	0.0569243	0.0586866	0.0687611	0.0393113	0.0354663	0.0274627	0.0250605	0.0323838	0.0614573	0.0340801	0.00318588	0.00614977	0.00638632	0.00604474	0.164396	0.0033189	0.105395	0.00476285	0.750464	0.00576989
X:4248497	X	FBgn0262609:4248497:-1	FBgn0262609	4248497	-1	CG43135	3	+	0.035409	0.0199108	0.030328	0.0416071	0.0280204	0.0506332	0.16101	0.130266	0.12078	0.0415816	0.0304799	0.0245445	0.0285493	0.0400869	0.137352	0.032202	0.00790076	0.0113828	0.0210302	0.00864813	0.230982	0.00634612	0.618009	0.00539308	0.397101	0.00622175
