# Supplementary material
Source: HighWire-hosted journal article supplement (doi:10.1101/rna.080311.124)
Supplement: Supplemental_File_S4.xlsx [file Supplemental_File_S4.xlsx]

## Sheet: Sheet1
gene	chromosome	WT_a	WT_b	WT_c	Het_a	Het_b	Het_c	Homo_a	Homo_b	Homo_c	Rescue_a	Rescue_b	Rescue_c	WT.AV	Het.AV	Homo.AV	Rescue.AV	WT.SD	Het.SD	Homo.SD	Rescue.SD	WT_vs_Homo_log2FC	Het_vs_Homo_log2FC	Rescue_vs_Homo_log2FC	adjPFDR_WT_vs_Homo	adjPFDR_Het_vs_Homo	adjPFDR_Rescue_vs_Homo
312	chr3L	780.376	878.339	786.469	488.391	499.941	466.546	595.219	629.78	618.105	826.691	835.16	748.377	815.061	484.959	614.368	803.409	54.8847	16.96	17.5812	47.8475	0.407805	-0.341239	0.387032	3.78624e-05	0.00267866	0.000121128
Sep1	chrX	7456.29	7453.56	7777.9	8173.62	8161.39	7848.83	7022.63	7449.2	7482.08	9117.39	8225.85	8705.58	7562.58	8061.28	7317.97	8682.94	186.473	184.087	256.298	446.204	0.0474355	0.139566	0.246741	0.552369	0.0764176	0.000200836
Sep2	chr3R	3127.28	3136.58	3131.95	2855.7	2917.98	3127.07	2961.84	3053.88	3331.94	3334.4	3374.24	3420.24	3131.94	2966.92	3115.89	3376.29	4.65378	142.146	192.687	42.9586	0.00741197	-0.0706778	0.115797	0.946523	0.498746	0.169644
Sep4	chrX	1144.01	942.724	1148.63	1284.96	1135.33	1463.99	1270.04	1204.97	1180.79	1095.35	1109.71	1080.63	1078.46	1294.76	1218.6	1095.23	117.57	164.551	46.1591	14.5367	-0.176257	0.0874586	-0.153991	0.173817	0.631815	0.282767
Sep5	chr2R	625.686	723.338	721.108	811.497	986.936	759.143	590.466	801.63	705.466	899.611	1025.23	790.838	690.044	852.525	699.188	905.227	55.7467	119.31	105.722	117.298	-0.0189913	0.286063	0.372599	0.92878	0.140854	0.0270228
Dec1	chrX	104071	96719.8	104307	115500	105948	125392	83747.6	76921.1	90379.5	82194.7	50942.9	99765.5	101699	115613	83682.8	77634.3	4313.74	9722.78	6729.43	24728.7	0.281304	0.466306	-0.108235	0.169941	0.0307387	0.676715
128up	chr2R	4468.69	4512.52	4471.3	4384.86	4437.73	4415.09	4438.6	4265.93	4640.48	4607.82	4494.51	4664.35	4484.17	4412.56	4448.34	4588.89	24.5837	26.5268	187.468	86.4896	0.0115749	-0.0116502	0.0448803	0.886434	0.919145	0.559422
14-3-3epsilon	chr3R	41647.4	45717.3	41053.9	38414.4	36099.4	34172.5	35515.9	34189.1	35717.6	37924.2	35565.3	38807.3	42806.2	36228.7	35140.9	37432.3	2538.53	2123.92	830.425	1676.02	0.28467	0.0439849	0.0911323	0.000161277	0.720759	0.323773
14-3-3zeta	chr2R	18891.8	18155.8	19142	18739.1	16302.9	15543.8	14911.4	13281	14056.7	15154.5	15416.9	16419.7	18729.9	16861.9	14083	15663.7	512.682	1669.37	815.505	667.752	0.411384	0.259812	0.153466	2.16412e-06	0.00867103	0.128187
140up	chr3R	532.18	576.286	558.243	586.496	558.699	484.645	616.604	536.779	548.592	601.02	543.334	512.718	555.569	543.28	567.325	552.357	22.1743	52.6471	43.0836	44.8376	-0.030208	-0.062479	-0.0385731	0.870638	0.760702	0.85554
18SrRNA:CR41548	chrUn_CP007120v1	0	0	0	0	0	0	0	0	0	0	0	0	0	0	0	0	0	0	0	0	#DIV/0!	#DIV/0!	#DIV/0!	NA	NA	NA
18SrRNA:CR45838	chrUn_CP007120v1	0	0	0	0	0	0	0	0	0	0	0	0	0	0	0	0	0	0	0	0	#DIV/0!	#DIV/0!	#DIV/0!	NA	NA	NA
18SrRNA:CR45841	chrUn_CP007120v1	0	0	0	0	0	0	0	0	0	0	0	0	0	0	0	0	0	0	0	0	#DIV/0!	#DIV/0!	#DIV/0!	NA	NA	NA
18w	chr2R	914.287	875.159	996.479	1342.54	939.133	1471.03	1171.43	854.196	1049.28	852.789	851.479	1175.11	928.642	1250.9	1024.97	959.793	61.9207	277.537	160.007	186.472	-0.142383	0.28739	-0.0947821	0.534322	0.239268	0.72574
26-29-p	chr3L	55776.1	66381	58587.6	55080.5	56942.5	54882.5	52160.6	57971.1	61288.2	73430.4	73593.9	70810.2	60248.2	55635.2	57140	72611.5	5493.99	1136.52	4620.2	1562.11	0.0764181	-0.0385035	0.345698	0.464088	0.800902	0.000101577
28SrRNA:CR45837	chrUn_CP007120v1	0	0	0	0	0	0	0	0	0	0	0	0	0	0	0	0	0	0	0	0	#DIV/0!	#DIV/0!	#DIV/0!	NA	NA	NA
28SrRNA:CR45844	chrUn_CP007120v1	0	0	0	0	0	0	0	0	0	0	0	0	0	0	0	0	0	0	0	0	#DIV/0!	#DIV/0!	#DIV/0!	NA	NA	NA
2mit	chr3R	0	0	0	0	0	0	0	0	1.87874	0	0	0	0	0	0.626246	0	0	0	1.08469	0	#NUM!	#NUM!	#NUM!	NA	NA	NA
2SrRNA:CR45836	chrX	0	0	0	0	0	0	0	0	0	0	0	0	0	0	0	0	0	0	0	0	#DIV/0!	#DIV/0!	#DIV/0!	NA	NA	NA
2SrRNA:CR45840	chrX	0	0	0	0	0	0	0	0	0	0	0	0	0	0	0	0	0	0	0	0	#DIV/0!	#DIV/0!	#DIV/0!	NA	NA	NA
2SrRNA:CR45843	chrX	0	0	0	0	0	0	0	0	0	0	0	0	0	0	0	0	0	0	0	0	#DIV/0!	#DIV/0!	#DIV/0!	NA	NA	NA
2SrRNA:CR45864	chrX	0	0	0	0	0	0	0	0	0	0	0	0	0	0	0	0	0	0	0	0	#DIV/0!	#DIV/0!	#DIV/0!	NA	NA	NA
4E-T	chr4	5942.86	5177.83	5623.14	5405.36	5439.6	4970.12	6878.87	7013.51	4752.27	4356.05	5043.6	4525.29	5581.28	5271.69	6214.88	4641.65	384.233	261.729	1268.45	358.238	-0.155132	-0.237461	-0.42109	0.33714	0.181946	0.00425119
5-HT1A	chr2R	4.61761	0	0	1.06636	0.995899	1.00549	1.18806	0	0	0	0	0	1.5392	1.02258	0.39602	0	2.66598	0.0382123	0.685927	0	1.95854	1.36857	#NUM!	NA	NA	NA
5-HT1B	chr2R	1.1544	0	1.07148	1.06636	0	1.00549	0	0	2.81811	0	0.959954	1.06153	0.741962	0.690614	0.939369	0.673827	0.643894	0.598863	1.62704	0.585757	-0.340347	-0.443812	-0.479314	NA	NA	NA
5-HT2A	chr3R	12.6984	4.76926	12.8578	10.6636	7.96719	3.01646	7.12837	10.1088	13.1512	2.30276	3.83982	4.24611	10.1085	7.21574	10.1295	3.46289	4.6246	3.87854	3.01145	1.02504	-0.00298848	-0.489338	-1.54851	0.963896	0.653496	0.112175
5-HT2B	chr3R	0	0.794877	0	0	0.995899	0	0	1.01088	0	0	0	0	0.264959	0.331966	0.336961	0	0.458922	0.574983	0.583634	0	-0.346813	-0.0215447	#NUM!	NA	NA	NA
5-HT7	chr3R	2.30881	2.38463	2.14297	1.06636	1.9918	0	0	1.01088	0	0	0.959954	2.12305	2.2788	1.01938	0.336961	1.02767	0.123595	0.99673	0.583634	1.06315	2.75762	1.59704	1.60872	NA	NA	0.770069
5.8SrRNA:CR40454	chrX	1.1544	0	1.07148	0	0	0	0	1.01088	1.87874	0.767587	0	0	0.741962	0	0.963207	0.255862	0.643894	0	0.940276	0.443166	-0.376501	#NUM!	-1.91248	NA	NA	NA
5.8SrRNA:CR45839	chrUn_CP007120v1	0	0	0	0	0	0	0	0	0	0	0	0	0	0	0	0	0	0	0	0	#DIV/0!	#DIV/0!	#DIV/0!	NA	NA	NA
5.8SrRNA:CR45842	chrUn_CP007120v1	0	0	0	0	0	0	0	0	0	0	0	0	0	0	0	0	0	0	0	0	#DIV/0!	#DIV/0!	#DIV/0!	NA	NA	NA
5.8SrRNA:CR45852	chrUn_CP007120v1	0	0	0	0	0	0	0	0	0	0	0	0	0	0	0	0	0	0	0	0	#DIV/0!	#DIV/0!	#DIV/0!	NA	NA	NA
5PtaseI	chr3R	900.434	733.671	927.904	1067.42	1009.84	969.29	761.547	862.283	757.132	1152.92	1169.22	986.159	854.003	1015.52	793.654	1102.77	105.112	49.3119	59.4757	101.314	0.105731	0.355633	0.474544	0.488605	0.0107537	0.000134635
5SrRNA:CR33353	chr2R	0	0	0	0	0	0	0	0	0	0	0	0	0	0	0	0	0	0	0	0	#DIV/0!	#DIV/0!	#DIV/0!	NA	NA	NA
5SrRNA:CR33354	chr2R	0	0	0	0	0	0	0	0	0	0	0	0	0	0	0	0	0	0	0	0	#DIV/0!	#DIV/0!	#DIV/0!	NA	NA	NA
5SrRNA:CR33355	chr2R	0	0	0	0	0	0	0	0	0	0	0	0	0	0	0	0	0	0	0	0	#DIV/0!	#DIV/0!	#DIV/0!	NA	NA	NA
5SrRNA:CR33357	chr2R	0	0	0	0	0	0	0	0	0	0	0	0	0	0	0	0	0	0	0	0	#DIV/0!	#DIV/0!	#DIV/0!	NA	NA	NA
5SrRNA:CR33358	chr2R	0	0	0	0	0	0	0	0	0	0	0	0	0	0	0	0	0	0	0	0	#DIV/0!	#DIV/0!	#DIV/0!	NA	NA	NA
5SrRNA:CR33359	chr2R	0	0	0	0	0	0	0	0	0	0	0	0	0	0	0	0	0	0	0	0	#DIV/0!	#DIV/0!	#DIV/0!	NA	NA	NA
5SrRNA:CR33360	chr2R	0	0	0	0	0	0	0	0	0	0	0	0	0	0	0	0	0	0	0	0	#DIV/0!	#DIV/0!	#DIV/0!	NA	NA	NA
5SrRNA:CR33361	chr2R	0	0	0	0	0	0	0	0	0	0	0	0	0	0	0	0	0	0	0	0	#DIV/0!	#DIV/0!	#DIV/0!	NA	NA	NA
5SrRNA:CR33362	chr2R	0	0	0	0	0	0	0	0	0	0	0	0	0	0	0	0	0	0	0	0	#DIV/0!	#DIV/0!	#DIV/0!	NA	NA	NA
5SrRNA:CR33364	chr2R	0	0	0	0	0	0	0	0	0	0	0	0	0	0	0	0	0	0	0	0	#DIV/0!	#DIV/0!	#DIV/0!	NA	NA	NA
5SrRNA:CR33365	chr2R	0	0	0	0	0	0	0	0	0	0	0	0	0	0	0	0	0	0	0	0	#DIV/0!	#DIV/0!	#DIV/0!	NA	NA	NA
5SrRNA:CR33366	chr2R	0	0	0	0	0	0	0	0	0	0	0	0	0	0	0	0	0	0	0	0	#DIV/0!	#DIV/0!	#DIV/0!	NA	NA	NA
5SrRNA:CR33367	chr2R	0	0	0	0	0	0	0	0	0	0	0	0	0	0	0	0	0	0	0	0	#DIV/0!	#DIV/0!	#DIV/0!	NA	NA	NA
5SrRNA:CR33368	chr2R	0	0	0	0	0	0	0	0	0	0	0	0	0	0	0	0	0	0	0	0	#DIV/0!	#DIV/0!	#DIV/0!	NA	NA	NA
5SrRNA:CR33369	chr2R	0	0	0	0	0	0	0	0	0	0	0	0	0	0	0	0	0	0	0	0	#DIV/0!	#DIV/0!	#DIV/0!	NA	NA	NA
5SrRNA:CR33370	chr2R	0	0	0	0	0	0	0	0	0	0	0	0	0	0	0	0	0	0	0	0	#DIV/0!	#DIV/0!	#DIV/0!	NA	NA	NA
5SrRNA:CR33372	chr2R	0	0	0	0	0	0	0	0	0	0	0	0	0	0	0	0	0	0	0	0	#DIV/0!	#DIV/0!	#DIV/0!	NA	NA	NA
5SrRNA:CR33373	chr2R	0	0	0	0	0	0	0	0	0	0	0	0	0	0	0	0	0	0	0	0	#DIV/0!	#DIV/0!	#DIV/0!	NA	NA	NA
5SrRNA:CR33374	chr2R	0	0	0	0	0	0	0	0	0	0	0	0	0	0	0	0	0	0	0	0	#DIV/0!	#DIV/0!	#DIV/0!	NA	NA	NA
5SrRNA:CR33375	chr2R	0	0	0	0	0	0	0	0	0	0	0	0	0	0	0	0	0	0	0	0	#DIV/0!	#DIV/0!	#DIV/0!	NA	NA	NA
5SrRNA:CR33376	chr2R	0	0	0	0	0	0	0	0	0	0	0	0	0	0	0	0	0	0	0	0	#DIV/0!	#DIV/0!	#DIV/0!	NA	NA	NA
5SrRNA:CR33377	chr2R	0	0	0	0	0	0	0	0	0	0	0	0	0	0	0	0	0	0	0	0	#DIV/0!	#DIV/0!	#DIV/0!	NA	NA	NA
5SrRNA:CR33378	chr2R	0	0	0	0	0	0	0	0	0	0	0	0	0	0	0	0	0	0	0	0	#DIV/0!	#DIV/0!	#DIV/0!	NA	NA	NA
5SrRNA:CR33379	chr2R	0	0	0	0	0	0	0	0	0	0	0	0	0	0	0	0	0	0	0	0	#DIV/0!	#DIV/0!	#DIV/0!	NA	NA	NA
5SrRNA:CR33380	chr2R	0	0	0	0	0	0	0	0	0	0	0	0	0	0	0	0	0	0	0	0	#DIV/0!	#DIV/0!	#DIV/0!	NA	NA	NA
5SrRNA:CR33381	chr2R	0	0	0	0	0	0	0	0	0	0	0	0	0	0	0	0	0	0	0	0	#DIV/0!	#DIV/0!	#DIV/0!	NA	NA	NA
5SrRNA:CR33382	chr2R	0	0	0	0	0	0	0	0	0	0	0	0	0	0	0	0	0	0	0	0	#DIV/0!	#DIV/0!	#DIV/0!	NA	NA	NA
5SrRNA:CR33383	chr2R	0	0	0	0	0	0	0	0	0	0	0	0	0	0	0	0	0	0	0	0	#DIV/0!	#DIV/0!	#DIV/0!	NA	NA	NA
5SrRNA:CR33384	chr2R	0	0	0	0	0	0	0	0	0	0	0	0	0	0	0	0	0	0	0	0	#DIV/0!	#DIV/0!	#DIV/0!	NA	NA	NA
5SrRNA:CR33385	chr2R	0	0	0	0	0	0	0	0	0	0	0	0	0	0	0	0	0	0	0	0	#DIV/0!	#DIV/0!	#DIV/0!	NA	NA	NA
5SrRNA:CR33386	chr2R	0	0	0	0	0	0	0	0	0	0	0	0	0	0	0	0	0	0	0	0	#DIV/0!	#DIV/0!	#DIV/0!	NA	NA	NA
5SrRNA:CR33387	chr2R	0	0	0	0	0	0	0	0	0	0	0	0	0	0	0	0	0	0	0	0	#DIV/0!	#DIV/0!	#DIV/0!	NA	NA	NA
5SrRNA:CR33388	chr2R	0	0	0	0	0	0	0	0	0	0	0	0	0	0	0	0	0	0	0	0	#DIV/0!	#DIV/0!	#DIV/0!	NA	NA	NA
5SrRNA:CR33389	chr2R	0	0	0	0	0	0	0	0	0	0	0	0	0	0	0	0	0	0	0	0	#DIV/0!	#DIV/0!	#DIV/0!	NA	NA	NA
5SrRNA:CR33390	chr2R	0	0	0	0	0	0	0	0	0	0	0	0	0	0	0	0	0	0	0	0	#DIV/0!	#DIV/0!	#DIV/0!	NA	NA	NA
5SrRNA:CR33391	chr2R	0	0	0	0	0	0	0	0	0	0	0	0	0	0	0	0	0	0	0	0	#DIV/0!	#DIV/0!	#DIV/0!	NA	NA	NA
5SrRNA:CR33392	chr2R	0	0	0	0	0	0	0	0	0	0	0	0	0	0	0	0	0	0	0	0	#DIV/0!	#DIV/0!	#DIV/0!	NA	NA	NA
5SrRNA:CR33393	chr2R	0	0	0	0	0	0	0	0	0	0	0	0	0	0	0	0	0	0	0	0	#DIV/0!	#DIV/0!	#DIV/0!	NA	NA	NA
5SrRNA:CR33394	chr2R	0	0	0	0	0	0	0	0	0	0	0	0	0	0	0	0	0	0	0	0	#DIV/0!	#DIV/0!	#DIV/0!	NA	NA	NA
5SrRNA:CR33395	chr2R	0	0	0	0	0	0	0	0	0	0	0	0	0	0	0	0	0	0	0	0	#DIV/0!	#DIV/0!	#DIV/0!	NA	NA	NA
5SrRNA:CR33396	chr2R	0	0	0	0	0	0	0	0	0	0	0	0	0	0	0	0	0	0	0	0	#DIV/0!	#DIV/0!	#DIV/0!	NA	NA	NA
5SrRNA:CR33397	chr2R	0	0	0	0	0	0	0	0	0	0	0	0	0	0	0	0	0	0	0	0	#DIV/0!	#DIV/0!	#DIV/0!	NA	NA	NA
5SrRNA:CR33398	chr2R	0	0	0	0	0	0	0	0	0	0	0	0	0	0	0	0	0	0	0	0	#DIV/0!	#DIV/0!	#DIV/0!	NA	NA	NA
5SrRNA:CR33399	chr2R	0	0	0	0	0	0	0	0	0	0	0	0	0	0	0	0	0	0	0	0	#DIV/0!	#DIV/0!	#DIV/0!	NA	NA	NA
5SrRNA:CR33400	chr2R	0	0	0	0	0	0	0	0	0	0	0	0	0	0	0	0	0	0	0	0	#DIV/0!	#DIV/0!	#DIV/0!	NA	NA	NA
5SrRNA:CR33401	chr2R	0	0	0	0	0	0	0	0	0	0	0	0	0	0	0	0	0	0	0	0	#DIV/0!	#DIV/0!	#DIV/0!	NA	NA	NA
5SrRNA:CR33402	chr2R	0	0	0	0	0	0	0	0	0	0	0	0	0	0	0	0	0	0	0	0	#DIV/0!	#DIV/0!	#DIV/0!	NA	NA	NA
5SrRNA:CR33403	chr2R	0	0	0	0	0	0	0	0	0	0	0	0	0	0	0	0	0	0	0	0	#DIV/0!	#DIV/0!	#DIV/0!	NA	NA	NA
5SrRNA:CR33404	chr2R	0	0	0	0	0	0	0	0	0	0	0	0	0	0	0	0	0	0	0	0	#DIV/0!	#DIV/0!	#DIV/0!	NA	NA	NA
5SrRNA:CR33405	chr2R	0	0	0	0	0	0	0	0	0	0	0	0	0	0	0	0	0	0	0	0	#DIV/0!	#DIV/0!	#DIV/0!	NA	NA	NA
5SrRNA:CR33406	chr2R	0	0	0	0	0	0	0	0	0	0	0	0	0	0	0	0	0	0	0	0	#DIV/0!	#DIV/0!	#DIV/0!	NA	NA	NA
5SrRNA:CR33407	chr2R	0	0	0	0	0	0	0	0	0	0	0	0	0	0	0	0	0	0	0	0	#DIV/0!	#DIV/0!	#DIV/0!	NA	NA	NA
5SrRNA:CR33408	chr2R	0	0	0	0	0	0	0	0	0	0	0	0	0	0	0	0	0	0	0	0	#DIV/0!	#DIV/0!	#DIV/0!	NA	NA	NA
5SrRNA:CR33409	chr2R	0	0	0	0	0	0	0	0	0	0	0	0	0	0	0	0	0	0	0	0	#DIV/0!	#DIV/0!	#DIV/0!	NA	NA	NA
5SrRNA:CR33410	chr2R	0	0	0	0	0	0	0	0	0	0	0	0	0	0	0	0	0	0	0	0	#DIV/0!	#DIV/0!	#DIV/0!	NA	NA	NA
5SrRNA:CR33411	chr2R	0	0	0	0	0	0	0	0	0	0	0	0	0	0	0	0	0	0	0	0	#DIV/0!	#DIV/0!	#DIV/0!	NA	NA	NA
5SrRNA:CR33412	chr2R	0	0	0	0	0	0	0	0	0	0	0	0	0	0	0	0	0	0	0	0	#DIV/0!	#DIV/0!	#DIV/0!	NA	NA	NA
5SrRNA:CR33413	chr2R	0	0	0	0	0	0	0	0	0	0	0	0	0	0	0	0	0	0	0	0	#DIV/0!	#DIV/0!	#DIV/0!	NA	NA	NA
5SrRNA:CR33414	chr2R	0	0	0	0	0	0	0	0	0	0	0	0	0	0	0	0	0	0	0	0	#DIV/0!	#DIV/0!	#DIV/0!	NA	NA	NA
5SrRNA:CR33415	chr2R	0	0	0	0	0	0	0	0	0	0	0	0	0	0	0	0	0	0	0	0	#DIV/0!	#DIV/0!	#DIV/0!	NA	NA	NA
5SrRNA:CR33417	chr2R	0	0	0	0	0	0	0	0	0	0	0	0	0	0	0	0	0	0	0	0	#DIV/0!	#DIV/0!	#DIV/0!	NA	NA	NA
5SrRNA:CR33418	chr2R	0	0	0	0	0	0	0	0	0	0	0	0	0	0	0	0	0	0	0	0	#DIV/0!	#DIV/0!	#DIV/0!	NA	NA	NA
5SrRNA:CR33419	chr2R	0	0	0	0	0	0	0	0	0	0	0	0	0	0	0	0	0	0	0	0	#DIV/0!	#DIV/0!	#DIV/0!	NA	NA	NA
5SrRNA:CR33420	chr2R	0	0	0	0	0	0	0	0	0	0	0	0	0	0	0	0	0	0	0	0	#DIV/0!	#DIV/0!	#DIV/0!	NA	NA	NA
5SrRNA:CR33421	chr2R	0	0	0	0	0	0	0	0	0	0	0	0	0	0	0	0	0	0	0	0	#DIV/0!	#DIV/0!	#DIV/0!	NA	NA	NA
5SrRNA:CR33422	chr2R	0	0	0	0	0	0	0	0	0	0	0	0	0	0	0	0	0	0	0	0	#DIV/0!	#DIV/0!	#DIV/0!	NA	NA	NA
5SrRNA:CR33423	chr2R	0	0	0	0	0	0	0	0	0	0	0	0	0	0	0	0	0	0	0	0	#DIV/0!	#DIV/0!	#DIV/0!	NA	NA	NA
5SrRNA:CR33424	chr2R	0	0	0	0	0	0	0	0	0	0	0	0	0	0	0	0	0	0	0	0	#DIV/0!	#DIV/0!	#DIV/0!	NA	NA	NA
5SrRNA:CR33425	chr2R	0	0	0	0	0	0	0	0	0	0	0	0	0	0	0	0	0	0	0	0	#DIV/0!	#DIV/0!	#DIV/0!	NA	NA	NA
5SrRNA:CR33426	chr2R	0	0	0	0	0	0	0	0	0	0	0	0	0	0	0	0	0	0	0	0	#DIV/0!	#DIV/0!	#DIV/0!	NA	NA	NA
5SrRNA:CR33427	chr2R	0	0	0	0	0	0	0	0	0	0	0	0	0	0	0	0	0	0	0	0	#DIV/0!	#DIV/0!	#DIV/0!	NA	NA	NA
5SrRNA:CR33428	chr2R	0	0	0	0	0	0	0	0	0	0	0	0	0	0	0	0	0	0	0	0	#DIV/0!	#DIV/0!	#DIV/0!	NA	NA	NA
5SrRNA:CR33429	chr2R	0	0	0	0	0	0	0	0	0	0	0	0	0	0	0	0	0	0	0	0	#DIV/0!	#DIV/0!	#DIV/0!	NA	NA	NA
5SrRNA:CR33430	chr2R	0	0	0	0	0	0	0	0	0	0	0	0	0	0	0	0	0	0	0	0	#DIV/0!	#DIV/0!	#DIV/0!	NA	NA	NA
5SrRNA:CR33431	chr2R	0	0	0	0	0	0	0	0	0	0	0	0	0	0	0	0	0	0	0	0	#DIV/0!	#DIV/0!	#DIV/0!	NA	NA	NA
5SrRNA:CR33432	chr2R	0	0	0	0	0	0	0	0	0	0	0	0	0	0	0	0	0	0	0	0	#DIV/0!	#DIV/0!	#DIV/0!	NA	NA	NA
5SrRNA:CR33433	chr2R	0	0	0	0	0	0	0	0	0	0	0	0	0	0	0	0	0	0	0	0	#DIV/0!	#DIV/0!	#DIV/0!	NA	NA	NA
5SrRNA:CR33434	chr2R	0	0	0	0	0	0	0	0	0	0	0	0	0	0	0	0	0	0	0	0	#DIV/0!	#DIV/0!	#DIV/0!	NA	NA	NA
5SrRNA:CR33435	chr2R	0	0	0	0	0	0	0	0	0	0	0	0	0	0	0	0	0	0	0	0	#DIV/0!	#DIV/0!	#DIV/0!	NA	NA	NA
5SrRNA:CR33436	chr2R	0	0	0	0	0	0	0	0	0	0	0	0	0	0	0	0	0	0	0	0	#DIV/0!	#DIV/0!	#DIV/0!	NA	NA	NA
5SrRNA:CR33437	chr2R	0	0	0	0	0	0	0	0	0	0	0	0	0	0	0	0	0	0	0	0	#DIV/0!	#DIV/0!	#DIV/0!	NA	NA	NA
5SrRNA:CR33438	chr2R	0	0	0	0	0	0	0	0	0	0	0	0	0	0	0	0	0	0	0	0	#DIV/0!	#DIV/0!	#DIV/0!	NA	NA	NA
5SrRNA:CR33439	chr2R	0	0	0	0	0	0	0	0	0	0	0	0	0	0	0	0	0	0	0	0	#DIV/0!	#DIV/0!	#DIV/0!	NA	NA	NA
5SrRNA:CR33440	chr2R	0	0	0	0	0	0	0	0	0	0	0	0	0	0	0	0	0	0	0	0	#DIV/0!	#DIV/0!	#DIV/0!	NA	NA	NA
5SrRNA:CR33441	chr2R	0	0	0	0	0	0	0	0	0	0	0	0	0	0	0	0	0	0	0	0	#DIV/0!	#DIV/0!	#DIV/0!	NA	NA	NA
5SrRNA:CR33442	chr2R	0	0	0	0	0	0	0	0	0	0	0	0	0	0	0	0	0	0	0	0	#DIV/0!	#DIV/0!	#DIV/0!	NA	NA	NA
5SrRNA:CR33443	chr2R	0	0	0	0	0	0	0	0	0	0	0	0	0	0	0	0	0	0	0	0	#DIV/0!	#DIV/0!	#DIV/0!	NA	NA	NA
5SrRNA:CR33444	chr2R	0	0	0	0	0	0	0	0	0	0	0	0	0	0	0	0	0	0	0	0	#DIV/0!	#DIV/0!	#DIV/0!	NA	NA	NA
5SrRNA:CR33445	chr2R	0	0	0	0	0	0	0	0	0	0	0	0	0	0	0	0	0	0	0	0	#DIV/0!	#DIV/0!	#DIV/0!	NA	NA	NA
5SrRNA:CR33446	chr2R	0	0	0	0	0	0	0	0	0	0	0	0	0	0	0	0	0	0	0	0	#DIV/0!	#DIV/0!	#DIV/0!	NA	NA	NA
5SrRNA:CR33447	chr2R	0	0	0	0	0	0	0	0	0	0	0	0	0	0	0	0	0	0	0	0	#DIV/0!	#DIV/0!	#DIV/0!	NA	NA	NA
5SrRNA:CR33448	chr2R	0	0	0	0	0	0	0	0	0	0	0	0	0	0	0	0	0	0	0	0	#DIV/0!	#DIV/0!	#DIV/0!	NA	NA	NA
5SrRNA:CR33449	chr2R	0	0	0	0	0	0	0	0	0	0	0	0	0	0	0	0	0	0	0	0	#DIV/0!	#DIV/0!	#DIV/0!	NA	NA	NA
5SrRNA:CR33450	chr2R	0	0	0	0	0	0	0	0	0	0	0	0	0	0	0	0	0	0	0	0	#DIV/0!	#DIV/0!	#DIV/0!	NA	NA	NA
5SrRNA:CR33451	chr2R	0	0	0	0	0	0	0	0	0	0	0	0	0	0	0	0	0	0	0	0	#DIV/0!	#DIV/0!	#DIV/0!	NA	NA	NA
5SrRNA:CR33452	chr2R	1.1544	0	0	0	0	0	0	0	0	0	0	0	0.384801	0	0	0	0.666495	0	0	0	#DIV/0!	#DIV/0!	#DIV/0!	NA	NA	NA
7B2	chr3R	1.1544	0	0	0	0	1.00549	0	2.02177	0	0	0.959954	0	0.384801	0.335162	0.673922	0.319985	0.666495	0.580518	1.16727	0.55423	-0.80847	-1.00772	-1.07458	NA	NA	NA
7SLRNA:CR32864	chr3R	0	0	0	0	0	0	0	0	0	0	0	0	0	0	0	0	0	0	0	0	#DIV/0!	#DIV/0!	#DIV/0!	NA	NA	NA
7SLRNA:CR42652	chr3R	0	0	0	0	0	0	0	0	0	0	0	0	0	0	0	0	0	0	0	0	#DIV/0!	#DIV/0!	#DIV/0!	NA	NA	NA
825-Oak	chr3L	0	0	0	0	0	0	0	0	0	0	0	0	0	0	0	0	0	0	0	0	#DIV/0!	#DIV/0!	#DIV/0!	NA	NA	NA
a	chr2R	925.831	710.62	835.757	967.185	903.281	1162.34	656.998	605.519	657.558	741.489	682.528	813.13	824.069	1010.94	640.025	745.715	108.08	134.959	29.8845	65.4036	0.364637	0.659491	0.220496	0.0116423	3.50168e-06	0.176025
a10	chr3L	1.1544	5.56414	1.07148	3.19907	5.9754	1.00549	3.56418	4.04353	4.69685	3.83793	2.87986	0	2.59667	3.39332	4.10152	2.23927	2.57023	2.49064	0.568553	1.99755	-0.659494	-0.273463	-0.873134	0.685252	0.893748	0.616653
A16	chr2L	1675.04	1699.45	1600.8	1419.32	1557.59	1364.45	1333	1598.21	1469.17	1814.57	1745.2	1717.55	1658.43	1447.12	1466.79	1759.11	51.3805	99.5254	132.617	49.9854	0.177148	-0.0194852	0.262176	0.07799	0.912988	0.00793094
a5	chr2L	0	0	0	0	0	0	0	0	0	0	0	0	0	0	0	0	0	0	0	0	#DIV/0!	#DIV/0!	#DIV/0!	NA	NA	NA
a6	chrX	832.324	578.67	874.33	798.701	898.301	895.889	700.956	943.154	867.977	1020.89	922.516	972.359	761.775	864.297	837.362	971.922	159.958	56.8209	123.967	49.1885	-0.136487	0.0456748	0.214988	0.471132	0.885181	0.27594
AANAT1	chr2R	93.5066	174.078	101.791	212.205	252.958	211.152	108.114	186.003	142.784	105.927	118.074	126.322	123.125	225.439	145.633	116.774	44.3204	23.8387	39.0226	10.2593	-0.242216	0.630393	-0.318618	0.469573	0.0422763	0.330394
AANATL2	chr2L	1.1544	0.794877	4.28593	1.06636	0	10.0549	10.6926	8.08707	7.51495	1.53517	0	2.12305	2.0784	3.70708	8.76486	1.21941	1.92021	5.52315	1.69376	1.09618	-2.07625	-1.24145	-2.84555	0.0867548	0.332437	0.0532022
AANATL3	chr2L	0	0	0	0	0	0	0	0	0	0	0	0	0	0	0	0	0	0	0	0	#DIV/0!	#DIV/0!	#DIV/0!	NA	NA	NA
AANATL4	chr2R	0	0	1.07148	0	0	0	0	0	0	0	0	0	0.357161	0	0	0	0.618621	0	0	0	#DIV/0!	#DIV/0!	#DIV/0!	NA	NA	NA
AANATL5	chr2R	0	0	0	0	0	0	0	0	0	0	0	0	0	0	0	0	0	0	0	0	#DIV/0!	#DIV/0!	#DIV/0!	NA	NA	NA
AANATL6	chr2R	0	0	0	0	0	0	0	0	0	0	0	0	0	0	0	0	0	0	0	0	#DIV/0!	#DIV/0!	#DIV/0!	NA	NA	NA
AANATL7	chrX	0	0	1.07148	0	0	0	0	0	0	0	0	1.06153	0.357161	0	0	0.353842	0.618621	0	0	0.612873	#DIV/0!	#DIV/0!	#DIV/0!	NA	NA	NA
Aasdh	chr2L	694.95	600.132	732.894	877.611	720.035	832.543	553.637	534.757	508.199	386.864	355.183	423.549	675.992	810.063	532.198	388.532	68.3814	81.1576	22.8268	34.2136	0.345045	0.606073	-0.453928	0.008887	3.14421e-06	0.000711129
Aatf	chr2L	1216.74	1189.93	1384.36	1192.19	1339.48	1232.73	1058.56	1210.03	1160.12	1619.61	1827.75	1512.68	1263.68	1254.8	1142.9	1653.35	105.368	76.0894	77.1862	160.225	0.144923	0.134753	0.532685	0.247948	0.379082	8.81958e-07
aay	chr3L	3351.23	3151.69	3412.67	2711.74	2755.65	2661.52	2439.09	2437.24	2699.75	2964.42	3106.41	3167.6	3305.2	2709.64	2525.36	3079.48	136.447	47.0994	151.028	104.232	0.388248	0.101613	0.286196	9.58082e-08	0.313053	0.000149798
ab	chr2L	19.6248	15.8975	22.5011	23.4598	28.8811	29.1591	14.2567	21.2285	18.7874	30.7035	20.159	21.2305	19.3412	27.1667	18.0909	24.031	3.31093	3.21323	3.53771	5.80329	0.0964121	0.586575	0.409634	0.907456	0.31035	0.449502
ABCA	chrX	1050.51	763.877	1035.05	1300.95	1238.9	1489.13	1267.66	1401.08	1177.97	832.064	707.486	720.777	949.812	1342.99	1282.24	753.442	161.21	130.303	112.27	68.4118	-0.432951	0.0667877	-0.767095	0.00312624	0.784011	7.4859e-08
ABCB7	chr3L	958.154	988.827	993.265	1100.48	1026.77	1192.51	1285.48	1093.78	1074.64	1160.59	1158.66	1346.02	980.082	1106.59	1151.3	1221.76	19.1192	83.0365	116.6	107.616	-0.232288	-0.0571462	0.0856955	0.0488953	0.761719	0.549348
ABCD	chr4	3794.52	4068.97	4029.85	4570.4	3592.21	4547.82	9152.82	5477.98	5244.5	3723.56	4728.73	4349.08	3964.45	4236.81	6625.1	4267.12	148.456	558.355	2192.18	507.573	-0.740822	-0.644964	-0.634678	0.000105918	0.00201793	0.00130202
abd-A	chr3R	77.345	71.5389	81.4327	86.3748	80.6678	57.3128	238.8	267.884	251.751	64.4773	73.9165	80.676	76.7722	74.7851	252.812	73.0233	4.97171	15.3982	14.5709	8.13624	-1.71941	-1.75724	-1.79164	1.49825e-19	1.01761e-19	1.7191e-21
Abd-B	chr3R	3.46321	4.76926	9.64335	4.26542	8.96309	4.02195	16.6329	27.2938	19.7268	4.60552	2.87986	4.24611	5.95861	5.75016	21.2178	3.9105	3.25721	2.78515	5.48467	0.910466	-1.83223	-1.8836	-2.43985	0.00252739	0.00496223	0.000272242
Abi	chr3R	2376.91	2320.25	2628.35	2852.5	2914	2981.27	2789.57	3475.42	3368.58	2657.38	2721.47	2533.86	2441.84	2915.92	3211.19	2637.57	163.99	64.4054	369.02	95.359	-0.395141	-0.139154	-0.283896	6.02512e-05	0.28573	0.00633531
Abl	chr3L	2778.65	2145.37	2866.22	3259.85	3653.95	3808.79	3250.54	4147.65	3641	3217.72	3068.97	2827.91	2596.75	3574.2	3679.73	3038.2	393.345	283.026	449.812	196.721	-0.502895	-0.0419802	-0.276382	0.000161209	0.863081	0.0617961
abo	chr2L	671.862	540.516	778.968	876.545	741.945	998.449	640.365	778.38	755.253	774.495	730.525	842.852	663.782	872.313	724.666	782.624	119.431	128.304	73.9169	56.6031	-0.126606	0.267529	0.111003	0.499747	0.189511	0.611321
Abp1	chr3L	2937.95	2955.35	3429.82	3376.08	3460.75	3394.52	2866.79	3485.53	3326.31	4232.47	4258.36	3959.5	3107.71	3410.45	3226.21	4150.11	279.091	44.524	321.283	165.582	-0.0539885	0.0801237	0.36331	0.654893	0.59202	0.000252292
abs	chr3R	851.949	885.493	901.117	821.094	877.387	891.867	771.052	1017.96	911.188	922.639	862.039	901.236	879.52	863.449	900.066	895.305	25.1224	37.3886	123.829	30.7324	-0.0333156	-0.0599198	-0.00765258	0.814677	0.73706	0.961433
ac	chrX	2.30881	0.794877	0	0	0	0	2.37612	1.01088	0	0	0	0	1.03456	0	1.129	0	1.17292	0	1.19246	0	-0.12603	#NUM!	#NUM!	NA	NA	NA
Ac13E	chrX	419.048	243.232	377.162	387.087	380.433	625.413	561.953	605.519	612.469	359.998	346.544	408.688	346.481	464.311	593.314	371.743	91.8357	139.558	27.3805	32.6947	-0.776019	-0.353703	-0.674489	0.000594099	0.218524	0.00410042
Ac3	chr2L	8.08082	7.94877	4.28593	24.5262	26.8893	24.1317	29.7015	35.3809	41.3322	72.1531	90.2357	74.3069	6.77184	25.1824	35.4716	78.8986	2.15387	1.49131	5.81589	9.87712	-2.38904	-0.494248	1.15334	1.83832e-07	0.28395	0.000167934
Ac76E	chr3L	162.771	155.001	165.008	94.9057	112.537	113.62	135.439	153.654	129.633	66.78	80.6362	61.5686	160.927	107.021	139.575	69.6616	5.25238	10.506	12.5335	9.85499	0.205359	-0.383154	-1.00261	0.335937	0.104494	4.56839e-07
Ac78C	chr3L	38.0953	27.8207	34.2875	22.3935	26.8893	39.214	38.018	45.4897	47.9078	23.7952	20.159	32.9073	33.4011	29.4989	43.8052	25.6205	5.19432	8.70863	5.15565	6.56724	-0.391204	-0.570439	-0.773802	0.318112	0.218768	0.0522712
Acam	chr3R	0	0	0	0	0	0	0	0	0	0	0	0	0	0	0	0	0	0	0	0	#DIV/0!	#DIV/0!	#DIV/0!	NA	NA	NA
Acbp1	chr2L	1483.41	1700.24	1367.21	1073.82	965.026	801.373	1619.33	1038.18	1164.82	1148.31	1188.42	1209.08	1516.95	946.74	1274.11	1181.94	169.03	137.141	305.601	30.8997	0.25169	-0.428447	-0.108333	0.170694	0.0295474	0.642403
Acbp2	chr3L	132.756	111.283	79.2897	38.3888	30.8729	56.3073	62.9672	42.4571	53.544	30.7035	20.159	30.7843	107.776	41.8563	52.9895	27.2156	26.9052	13.0669	10.2663	6.11129	1.02426	-0.34026	-0.961272	0.00134927	0.512141	0.0149248
Acbp3	chr3L	0	0	25.7156	0	0	0	0	0	0	0.767587	0	0	8.57186	0	0	0.255862	14.8469	0	0	0.443166	#DIV/0!	#DIV/0!	#DIV/0!	0.279581	1	0.98338
Acbp4	chr3L	0	0	0	0	0	0	0	0	0	0	0	0	0	0	0	0	0	0	0	0	#DIV/0!	#DIV/0!	#DIV/0!	NA	NA	NA
Acbp5	chr3L	0	0	13.9293	0	0	0	0	0	0	0	0	0	4.64309	0	0	0	8.04207	0	0	0	#DIV/0!	#DIV/0!	#DIV/0!	NA	NA	1
Acbp6	chr3L	26.5513	38.1541	38.5734	18.128	11.9508	7.03841	13.0687	11.1197	13.1512	12.2814	9.59954	22.2921	34.4262	12.3724	12.4465	14.7243	6.82316	5.55683	1.14979	6.68962	1.46777	-0.00861501	0.24246	0.00289691	0.993323	0.800936
ACC	chr2R	4849.65	4025.26	5039.18	5343.51	4180.78	7275.71	4857.98	4605.58	5419.22	4510.34	3820.62	5808.68	4638.03	5600	4960.93	4713.21	539.072	1563.32	416.473	1009.44	-0.0970986	0.174816	-0.0739002	0.694597	0.548447	0.801224
AcCoAS	chr3L	1985.57	2047.6	2056.18	1774.42	1733.86	2326.7	3031.93	2552.48	2756.11	2505.4	2230.93	2902.21	2029.78	1944.99	2780.17	2546.18	38.5274	331.189	240.63	337.493	-0.453849	-0.515411	-0.126839	0.0010564	0.000453725	0.466744
Ace	chr3R	136.22	137.514	148.936	87.4412	58.7581	52.2853	85.5404	70.7618	77.0283	2.30276	3.83982	13.7999	140.89	66.1615	77.7768	6.64748	6.99834	18.7107	7.41767	6.24163	0.857154	-0.233348	-3.54846	0.00211111	0.601939	1.86964e-19
Acer	chr2L	5464.94	5975.09	6491.04	7527.41	7151.55	8196.73	5393.8	6342.28	6150.99	7311.26	6295.38	7316.04	5977.03	7625.23	5962.36	6974.23	513.054	529.412	501.59	587.905	0.00354499	0.354898	0.226151	0.98183	0.00230409	0.0548554
Acf	chr3R	3944.59	3722.41	4078.06	3397.41	3998.54	3496.08	1727.44	2539.34	1952.95	7750.32	7779.47	6944.51	3915.02	3630.67	2073.24	7491.43	179.663	322.374	419.103	473.874	0.917131	0.808349	1.85335	1.91803e-12	1.99202e-09	1.37063e-50
achi	chr2R	417.894	407.772	397.52	430.808	467.077	468.557	378.992	439.734	389.838	399.145	357.103	324.827	407.729	455.481	402.855	360.358	10.1868	21.38	32.3958	37.2657	0.0173497	0.17713	-0.160827	0.925956	0.278703	0.298022
Achl	chr2R	20.7792	43.7182	57.8601	12.7963	10.9549	13.0713	32.0777	26.283	27.2417	23.0276	12.4794	32.9073	40.7859	12.2742	28.5341	22.8048	18.7135	1.15077	3.10602	10.2158	0.515381	-1.21706	-0.323351	0.299407	0.0647956	0.619417
acj6	chrX	0	0	0	0	0	0	0	2.02177	0	1.53517	0	0	0	0	0.673922	0.511724	0	0	1.16727	0.886333	#NUM!	#NUM!	-0.397215	NA	NA	NA
Ack	chr3L	1947.48	1732.83	1965.1	2007.95	1946.98	2087.39	1883.08	2266.4	2261.06	1915.13	1893.99	1921.36	1881.8	2014.11	2136.85	1910.16	129.314	70.4067	219.787	14.3472	-0.183368	-0.0853425	-0.161789	0.0713858	0.546571	0.141269
Ack-like	chr2R	2021.36	1947.45	2241.54	2321.46	2637.14	2797.27	2393.94	2951.78	2619.9	2560.67	2864.5	2475.48	2070.12	2585.29	2655.21	2633.55	152.99	242.105	280.589	204.496	-0.359113	-0.0384999	-0.0118153	0.00204831	0.852421	0.9483
Acn	chr2L	4042.72	3999.82	4254.86	4472.3	4586.12	4443.25	3756.65	4016.24	3911.53	4465.82	4415.79	4378.8	4099.13	4500.55	3894.81	4420.14	136.558	75.5091	130.6	43.6725	0.0737666	0.20855	0.182539	0.281833	0.00135196	0.00342038
Acox57D-d	chr2R	1805.49	2091.32	1931.88	1248.7	1381.31	1360.42	1468.44	1719.51	1612.9	1924.34	1907.43	1773.81	1942.9	1330.15	1600.28	1868.53	143.236	71.3013	126.009	82.4604	0.279881	-0.266743	0.223573	0.00439537	0.0160623	0.0333806
Acox57D-p	chr2R	2035.21	1874.32	2054.03	2041.01	2225.83	2183.92	1973.37	2440.27	1998.98	2011.08	2016.86	2057.24	1987.85	2150.25	2137.54	2028.39	98.7737	96.9047	262.486	25.1483	-0.104739	0.0085549	-0.0756139	0.357244	0.969132	0.562253
Acp1	chr2L	0	0	0	0	0.995899	0	1.18806	0	0	0	0	0	0	0.331966	0.39602	0	0	0.574983	0.685927	0	#NUM!	-0.254538	#NUM!	NA	NA	NA
Acp24A4	chr2L	0	0	0	0	0	0	0	0	0	0	0	0	0	0	0	0	0	0	0	0	#DIV/0!	#DIV/0!	#DIV/0!	NA	NA	NA
Acp26Aa	chr2L	2.30881	0.794877	0	0	0	0	0	0	0	0.767587	2.87986	0	1.03456	0	0	1.21582	1.17292	0	0	1.49134	#DIV/0!	#DIV/0!	#DIV/0!	NA	NA	NA
Acp26Ab	chr2L	0	0	1.07148	0	0.995899	3.01646	1.18806	0	0	0.767587	0	0	0.357161	1.33745	0.39602	0.255862	0.618621	1.53696	0.685927	0.443166	-0.149	1.75584	-0.630208	NA	NA	NA
Acp29AB	chr2L	0	0	0	0	0	0	0	0	0	0	0	0	0	0	0	0	0	0	0	0	#DIV/0!	#DIV/0!	#DIV/0!	NA	NA	NA
Acp32CD	chr2L	0	0	0	0	0	0	0	0	0	0	0	0	0	0	0	0	0	0	0	0	#DIV/0!	#DIV/0!	#DIV/0!	NA	NA	NA
Acp33A	chr2L	0	0	0	0	0	0	0	0	0	0	0	0	0	0	0	0	0	0	0	0	#DIV/0!	#DIV/0!	#DIV/0!	NA	NA	NA
Acp36DE	chr2L	0	0	0	0	0	1.00549	1.18806	1.01088	1.87874	0	0	0	0	0.335162	1.35923	0	0	0.580518	0.458548	0	#NUM!	-2.01985	#NUM!	NA	NA	NA
Acp53C14a	chr2R	0	0	0	0	0	0	0	0	0	0	0	0	0	0	0	0	0	0	0	0	#DIV/0!	#DIV/0!	#DIV/0!	NA	NA	NA
Acp53C14b	chr2R	0	0	0	0	0	0	0	0	0	0	0	0	0	0	0	0	0	0	0	0	#DIV/0!	#DIV/0!	#DIV/0!	NA	NA	NA
Acp53C14c	chr2R	0	0	0	1.06636	0	0	0	0	0	0	0	0	0	0.355452	0	0	0	0.615661	0	0	#DIV/0!	#DIV/0!	#DIV/0!	NA	NA	NA
Acp53Ea	chr2R	0	0	0	0	0	0	0	0	0	0	0	0	0	0	0	0	0	0	0	0	#DIV/0!	#DIV/0!	#DIV/0!	NA	NA	NA
Acp54A1	chr2R	1.1544	0	0	0	0	0	2.37612	0	0.939369	0	0	1.06153	0.384801	0	1.10516	0.353842	0.666495	0	1.19671	0.612873	-1.52208	#NUM!	-1.64308	NA	NA	NA
Acp62F	chr3L	0	0	0	1.06636	0	0	0	0	0	0	0	0	0	0.355452	0	0	0	0.615661	0	0	#DIV/0!	#DIV/0!	#DIV/0!	NA	NA	NA
Acp63F	chr3L	0	0	0	0	0	0	0	0	0	0	0	1.06153	0	0	0	0.353842	0	0	0	0.612873	#DIV/0!	#DIV/0!	#DIV/0!	NA	NA	NA
Acp65Aa	chr3L	0	0	0	0	0	0	0	0	0	0	0	0	0	0	0	0	0	0	0	0	#DIV/0!	#DIV/0!	#DIV/0!	NA	NA	NA
Acp76A	chr3L	0	0	0	0	0	0	0	0	0	0	0	0	0	0	0	0	0	0	0	0	#DIV/0!	#DIV/0!	#DIV/0!	NA	NA	NA
Acp95EF	chr3R	0	0	0	0	0	1.00549	0	0	0	0	0	0	0	0.335162	0	0	0	0.580518	0	0	#DIV/0!	#DIV/0!	#DIV/0!	NA	NA	NA
Acp98AB	chr3R	0	0	0	0	0	0	0	0	0	0	0	0	0	0	0	0	0	0	0	0	#DIV/0!	#DIV/0!	#DIV/0!	NA	NA	NA
Acph-1	chr3R	5406.07	5730.27	5257.77	5129.17	5180.67	5037.49	4891.25	5016	4950.48	5151.27	5055.12	5082.59	5464.7	5115.78	4952.58	5096.33	241.645	72.522	62.4037	49.5272	0.141963	0.0467743	0.0412791	0.0182948	0.599212	0.597166
Acsl	chr2R	9643.88	8739.67	10007.7	11491.1	10399.2	12615.8	14879.3	14523.4	13734.5	10640.3	9350.91	11185.3	9463.73	11502	14379.1	10392.2	652.904	1108.38	585.865	942.031	-0.603487	-0.322081	-0.468472	1.19294e-09	0.00448955	4.19604e-06
Act42A	chr2R	16252.8	18505.5	16601.6	13877.6	12771.4	12830	14363.7	14692.2	16554.5	16971.3	16117.6	16547.1	17120	13159.7	15203.4	16545.4	1212.53	622.405	1181.52	426.856	0.171282	-0.208276	0.122027	0.0574336	0.0356411	0.224849
Act57B	chr2R	1849.35	2328.99	1946.88	2100.72	3169.95	1859.15	3258.85	4019.27	4102.23	1179.01	1244.1	1175.11	2041.74	2376.6	3793.45	1199.41	253.498	697.591	464.829	38.7542	-0.89371	-0.674608	-1.66119	4.38972e-07	0.000466836	1.3862e-22
Act5C	chrX	144921	163706	144077	141367	133371	140310	112201	114809	131805	137192	133012	149897	150902	138349	119605	140034	11097.4	4343.6	10645.7	8793.94	0.335333	0.210038	0.227498	0.000261628	0.0529811	0.0213742
Act79B	chr3L	0	0	0	0	0	0	2.37612	1.01088	0.939369	0.767587	0	0	0	0	1.44212	0.255862	0	0	0.809656	0.443166	#NUM!	#NUM!	-2.49476	NA	NA	NA
Act87E	chr3R	123.521	163.745	162.865	146.091	241.008	139.763	258.997	292.145	291.204	105.927	88.3158	78.553	150.044	175.62	280.782	90.9319	22.9735	56.7153	18.8722	13.8732	-0.904069	-0.676992	-1.62659	0.000101322	0.00887081	1.5116e-12
Act88F	chr3R	0	0	0	0	0	0	0	1.01088	1.87874	0.767587	0	0	0	0	0.963207	0.255862	0	0	0.940276	0.443166	#NUM!	#NUM!	-1.91248	NA	NA	NA
Actbeta	chr4	1.1544	0.794877	1.07148	1.06636	3.9836	3.01646	0	0	1.87874	0.767587	2.87986	0	1.00692	2.6888	0.626246	1.21582	0.188258	1.48597	1.08469	1.49134	0.685148	2.10216	0.957124	0.879808	NA	0.823234
Actn	chrX	5276.77	5127.75	5511.71	5829.77	5962.45	6244.08	5389.05	6116.85	6256.2	5984.87	5709.81	6333.07	5305.41	6012.1	5920.7	6009.25	193.575	211.569	465.668	312.345	-0.158303	0.0221006	0.0214173	0.0704095	0.889145	0.871966
Actn3	chr3R	0	0.794877	1.07148	0	0	0	2.37612	1.01088	0	0	0	0	0.62212	0	1.129	0	0.55624	0	1.19246	0	-0.859783	#NUM!	#NUM!	NA	NA	NA
ACXA	chr2L	0	0	0	0	0	0	0	1.01088	0	0.767587	0	0	0	0	0.336961	0.255862	0	0	0.583634	0.443166	#NUM!	#NUM!	-0.397215	NA	NA	NA
ACXB	chr2L	0	0	0	0	0	0	0	0	0	0	0	0	0	0	0	0	0	0	0	0	#DIV/0!	#DIV/0!	#DIV/0!	NA	NA	NA
ACXC	chr2L	0	0	1.07148	0	0	0	0	0	0	0	0	0	0.357161	0	0	0	0.618621	0	0	0	#DIV/0!	#DIV/0!	#DIV/0!	NA	NA	NA
ACXD	chr3L	18.4704	27.8207	28.93	19.1944	15.9344	14.0768	20.197	23.2503	25.363	62.9421	50.8776	62.6301	25.0737	16.4019	22.9368	58.8166	5.74545	2.59062	2.5972	6.87716	0.128514	-0.483802	1.35856	0.798768	0.413419	8.42197e-05
ACXE	chr2L	0	0	0	0	0	0	0	0	0	0	0	0	0	0	0	0	0	0	0	0	#DIV/0!	#DIV/0!	#DIV/0!	NA	NA	NA
Acyp	chr2L	0	0	0	0	0	0	0	0	0	0	0	0	0	0	0	0	0	0	0	0	#DIV/0!	#DIV/0!	#DIV/0!	NA	NA	NA
Acyp2	chr3R	742.281	836.21	691.107	481.993	528.822	432.36	807.882	489.267	552.349	661.66	664.288	729.269	756.533	481.058	616.499	685.072	73.5943	48.2383	168.716	38.298	0.295303	-0.357888	0.152157	0.118243	0.102743	0.499236
Ada	chr3R	449.063	488.849	459.666	386.021	372.466	335.833	331.469	317.417	390.778	275.564	274.547	275.997	465.859	364.773	346.555	275.369	20.6037	25.9634	38.9373	0.744331	0.426812	0.0739171	-0.331716	0.000795693	0.735669	0.0167459
Ada1-1	chr2L	183.55	221.771	185.367	90.6402	60.7499	72.3951	26.1373	13.1415	14.0905	37.6117	40.3181	36.0919	196.896	74.5951	17.7898	38.0072	21.5614	15.0662	7.24475	2.14066	3.46831	2.06803	1.09523	8.62799e-38	1.09627e-10	0.00408498
Ada1-2	chr2L	151.227	158.975	147.865	171.683	162.332	144.79	115.242	124.339	90.1794	126.652	191.991	133.752	152.689	159.602	109.92	150.798	5.69784	13.6528	17.6905	35.85	0.474141	0.538022	0.456167	0.038103	0.0338756	0.0593608
Ada2a	chr3R	383.262	375.977	383.591	392.419	409.315	409.233	382.556	396.266	298.719	344.646	333.104	363.042	380.943	403.656	359.18	346.931	4.30415	9.73131	52.8076	15.0992	0.0848667	0.168416	-0.0500605	0.590608	0.336233	0.811725
Ada2b	chr3R	5761.62	5777.96	5891.01	5358.44	6042.12	5667.93	5398.55	6146.17	5914.27	6056.26	6087.07	5730.12	5810.2	5689.5	5819.66	5957.82	70.463	342.351	382.683	197.79	-0.00234805	-0.0326346	0.0338482	0.980369	0.806241	0.766362
Ada3	chrX	1254.84	1176.42	1315.78	1428.92	1387.29	1606.77	1664.47	1736.7	1552.78	1373.21	1511.93	1504.18	1249.01	1474.32	1651.32	1463.11	69.8641	116.573	92.6633	77.9481	-0.40283	-0.163562	-0.17458	2.47838e-05	0.177646	0.106235
AdamTS-A	chr3R	1279.08	925.237	1195.78	1229.51	1094.49	1399.64	904.115	1145.33	1079.34	921.871	791.962	857.714	1133.36	1241.21	1042.93	857.183	184.993	152.909	124.661	64.9562	0.119972	0.251113	-0.282964	0.521485	0.194277	0.0999104
Adar	chrX	1316.02	1262.26	1326.5	1603.8	1702.99	1642.97	1732.19	1739.73	1437.23	1459.95	1431.29	1296.12	1301.59	1649.92	1636.39	1395.79	34.4602	49.9582	172.511	87.4931	-0.330235	0.0118809	-0.229433	0.000999599	0.948643	0.0348528
Adat1	chr2L	169.697	193.95	166.08	186.612	194.2	173.949	162.764	146.578	142.784	241.79	225.589	208.059	176.576	184.921	150.709	225.146	15.1549	10.231	10.6113	16.8696	0.228522	0.295142	0.579097	0.18913	0.141134	0.00029031
Adck	chr2R	1760.46	1754.29	1740.09	1676.31	1627.3	1709.33	1476.76	1462.75	1473.87	1814.57	1638.64	1781.24	1751.62	1670.98	1471.13	1744.82	10.4483	41.2736	7.39815	93.4507	0.251765	0.183773	0.246157	0.000545285	0.0289433	0.000879541
ADD1	chr2R	2828.29	2304.35	3141.59	3453.93	4047.33	3818.84	2955.9	3906.05	3349.79	3665.23	3530.71	3276.93	2758.07	3773.37	3403.91	3490.96	423.013	299.306	477.385	197.175	-0.303533	0.148658	0.0364284	0.0340134	0.443729	0.866505
AdenoK	chr3L	4034.64	4418.72	3901.27	3393.14	3153.02	3053.66	4179.6	3303.57	3661.66	3178.58	3306.08	3518.96	4118.21	3199.94	3714.94	3334.54	268.658	174.537	440.44	171.968	0.148677	-0.215294	-0.155852	0.191648	0.0860918	0.201431
Adf1	chr2R	2492.36	2464.12	2534.06	2461.15	2600.29	2348.82	3094.9	3441.05	3100.86	2925.27	3092.97	2890.54	2496.84	2470.09	3212.27	2969.59	35.185	125.975	198.15	108.251	-0.363487	-0.379031	-0.113326	1.60251e-06	1.52368e-06	0.208058
Adgf-A	chr3L	724.965	709.03	760.753	1011.97	946.104	943.147	954.013	733.901	898.976	412.962	346.544	304.658	731.583	967.074	862.297	354.721	26.4889	38.9104	114.548	54.6128	-0.237164	0.165442	-1.2815	0.10313	0.362057	8.62324e-23
Adgf-A2	chr3L	9.23522	3.97438	6.4289	7.46449	5.9754	5.02744	19.009	22.2394	15.9693	3.83793	0.959954	4.24611	6.54617	6.15577	19.0726	3.01467	2.63238	1.2285	3.13556	1.7911	-1.54278	-1.63149	-2.66143	0.00927042	0.0156995	0.000188788
Adgf-B	chr3L	0	0	0	0	0	0	0	0	0	0	0.959954	0	0	0	0	0.319985	0	0	0	0.55423	#DIV/0!	#DIV/0!	#DIV/0!	NA	NA	NA
Adgf-C	chr3R	5.77201	1.58975	6.4289	5.33178	7.96719	7.03841	14.2567	9.09795	7.51495	0.767587	8.63959	4.24611	4.59689	6.77913	10.2899	4.55109	2.62488	1.3367	3.5254	3.94485	-1.1625	-0.602054	-1.17694	0.20836	0.612075	0.233888
Adgf-D	chr3R	18.4704	20.6668	11.7863	5.33178	18.9221	9.04939	10.6926	12.1306	5.63622	11.5138	2.87986	5.30763	16.9745	11.1011	9.48646	6.5671	4.62537	7.02362	3.41105	4.45263	0.83943	0.226759	-0.530613	0.247218	0.857827	0.663575
Adgf-E	chr2R	0	0	0	0	0	0	0	0	0	0	0	0	0	0	0	0	0	0	0	0	#DIV/0!	#DIV/0!	#DIV/0!	NA	NA	NA
Adh	chr2L	6.92642	2.38463	3.21445	21.3271	16.9303	16.0878	23.7612	9.09795	25.363	27.6331	17.2792	35.0304	4.17517	18.1151	19.4074	26.6476	2.41851	2.81343	8.96408	8.91655	-2.2167	-0.0994153	0.457398	0.0035388	0.928682	0.461566
Adhr	chr2L	0	0	0	0	0	0	0	0	0	0	0	0	0	0	0	0	0	0	0	0	#DIV/0!	#DIV/0!	#DIV/0!	NA	NA	NA
Adi1	chr3L	1544.59	1879.88	1492.58	1487.57	1439.07	1263.9	1905.65	1211.04	1485.14	1400.85	1444.73	1423.51	1639.02	1396.85	1533.94	1423.03	210.212	117.662	349.868	21.9468	0.0955851	-0.135072	-0.108281	0.615881	0.570966	0.613357
AdipoR	chr3R	7885.72	7805.69	7648.25	7467.69	6537.08	7114.83	7608.34	6741.58	7087.54	6724.83	6423.05	6776.79	7779.89	7039.87	7145.82	6641.56	120.823	469.811	436.311	191.003	0.122649	-0.0215518	-0.105579	0.142101	0.882889	0.249829
Adk1	chr3L	413.276	430.823	408.235	341.234	415.29	377.058	559.577	481.18	559.864	386.864	427.18	368.35	417.445	377.861	533.54	394.131	11.8571	37.0346	45.3453	30.0807	-0.354012	-0.497744	-0.436922	0.00600166	0.000210075	0.000668076
Adk2	chr2R	7122.66	7345.46	6800.7	5590.9	5328.06	5392.43	6126.83	4946.25	5317.77	5559.63	5775.09	5955.17	7089.61	5437.13	5463.62	5763.29	273.877	137.005	603.652	198.032	0.375849	-0.00701095	0.077037	1.95465e-05	0.973303	0.502695
Adk3	chr3R	930.448	782.159	879.688	741.117	701.113	771.209	703.332	577.214	567.379	939.526	868.759	1062.59	864.098	737.813	615.975	956.958	75.3639	35.1645	75.8131	98.0836	0.488323	0.260383	0.635583	0.000130491	0.0920631	3.7373e-07
AdoR	chr3R	15.0072	8.74365	9.64335	14.929	14.9385	14.0768	20.197	20.2177	13.1512	7.67587	12.4794	8.49222	11.1314	14.6481	17.8553	9.54916	3.38657	0.494762	4.0739	2.57028	-0.681716	-0.285638	-0.902906	0.242009	0.733684	0.148213
adp	chr2R	1464.94	1407.73	1461.5	1468.37	1497.83	1577.61	1469.63	1650.77	1588.47	1609.63	1606.96	1721.8	1444.72	1514.6	1569.63	1646.13	32.0849	56.5171	92.0293	65.5431	-0.119629	-0.0514794	0.0686574	0.168847	0.683691	0.516323
ADPS	chr2R	1.1544	0	2.14297	0	0	0	0	1.01088	2.81811	0	0	0	1.09912	0	1.27633	0	1.07255	0	1.42768	0	-0.215649	#NUM!	#NUM!	NA	NA	NA
AdSL	chr3R	4527.57	4843.98	4757.38	4299.55	3928.82	4417.11	3736.45	3640.19	4014.86	4353.75	4477.23	4812.96	4709.64	4215.16	3797.17	4547.98	163.52	254.845	194.576	237.641	0.310694	0.150663	0.260302	0.000106318	0.131169	0.00177928
AdSS	chr3R	7776.06	8188.82	7921.47	6895.06	7211.31	8131.38	6884.81	7122.68	7655.86	7553.05	7684.43	7447.67	7962.12	7412.58	7221.12	7561.72	209.363	642.265	394.835	118.618	0.14093	0.0377532	0.0664919	0.107242	0.784817	0.52989
Aduk	chr3R	1116.31	1173.24	1029.7	1090.88	1175.16	991.41	1262.91	1298.98	1208.97	1222	1291.14	1191.03	1106.41	1085.82	1256.95	1234.72	72.2811	91.9799	45.3029	51.2515	-0.184041	-0.21115	-0.0257443	0.0779204	0.0689448	0.867556
Ady43A	chr2R	1355.27	1583.39	1330.78	566.235	568.658	530.897	724.717	652.02	643.468	632.491	623.01	596.578	1423.15	555.264	673.402	617.36	139.316	21.1366	44.6459	18.6114	1.07955	-0.278295	-0.125355	2.85305e-28	0.0302248	0.359747
Aef1	chr3L	5073.6	3997.44	5583.5	6358.68	6117.81	7183.2	5693.19	6901.3	6098.39	5798.35	6026.59	5513.57	4884.84	6553.23	6230.96	5779.5	809.704	558.706	614.869	257.03	-0.351141	0.0727521	-0.108508	0.00848078	0.732071	0.520605
aft	chr2R	1832.04	1815.5	2136.54	2212.69	1950.97	2099.46	2363.05	2545.4	2341.85	2286.64	2320.21	2360.84	1928.02	2087.7	2416.77	2322.56	180.767	131.256	111.905	37.1536	-0.325956	-0.211162	-0.0573622	0.000399036	0.0510547	0.645657
Afti	chr3R	1932.47	1624.73	2137.61	2674.42	2591.33	2816.37	2426.02	2852.71	2510.93	2406.38	2224.21	2129.42	1898.27	2694.04	2596.56	2253.34	258.145	113.796	225.864	140.759	-0.451915	0.053172	-0.204534	8.68257e-05	0.787806	0.120505
Ag5r	chrX	0	0.794877	0	1.06636	2.9877	2.01097	1.18806	1.01088	0.939369	1.53517	0.959954	0	0.264959	2.02168	1.0461	0.831709	0.458922	0.960716	0.128033	0.77558	-1.98119	0.950525	-0.330876	NA	NA	0.93677
Ag5r2	chrX	0	0	0	0	0	1.00549	0	0	0	0	0	0	0	0.335162	0	0	0	0.580518	0	0	#DIV/0!	#DIV/0!	#DIV/0!	NA	NA	NA
AGBE	chr2R	6511.98	7459.92	6332.47	5531.19	5501.35	5887.13	4356.62	4066.78	4400.94	4706.84	4430.19	5095.33	6768.12	5639.89	4274.78	4744.12	605.8	214.636	181.491	334.133	0.662905	0.399815	0.150289	2.17146e-14	2.5396e-05	0.154357
AgmNAT	chrX	72.7274	103.334	92.1475	62.915	90.6268	75.4115	49.8986	62.6748	69.5133	59.8718	71.9966	53.0763	89.403	76.3178	60.6956	61.6482	15.4868	13.8781	9.95603	9.58439	0.558732	0.330429	0.0224685	0.0487717	0.393025	0.975623
ago	chr3L	12011.6	11363.6	12383.1	12806.9	13465.6	14264.8	15219.1	16249.9	15242.2	11547.6	12750.1	12522.8	11919.4	13512.4	15570.4	12273.5	515.993	730.087	588.614	638.865	-0.385493	-0.204518	-0.343259	1.52425e-07	0.0168269	4.19604e-06
AGO1	chr2R	4831.17	3583.3	5148.48	6551.69	6251.26	8156.51	6725.61	7898.03	6817.94	5571.91	5428.54	5444.57	4520.99	6986.49	7147.2	5481.67	827.408	1024.35	651.879	78.5569	-0.66074	-0.03281	-0.382761	4.0237e-06	0.907844	0.013525
AGO2	chr3L	6689.76	6186.53	6997.86	8138.43	8444.23	9220.32	7564.39	9509.38	8943.73	6109.22	5680.05	6358.55	6624.72	8600.99	8672.5	6049.27	409.557	557.721	1000.46	343.198	-0.388589	-0.0119449	-0.519686	0.00018293	0.954444	3.93963e-07
AGO3	chr3L	6045.61	6343.91	5626.36	6929.18	6070.01	5962.54	11034.7	7250.05	6628.19	5654.81	6464.33	5810.8	6005.29	6320.58	8304.32	5976.65	360.472	529.8	2384.95	429.489	-0.467627	-0.393806	-0.474526	0.00583733	0.0426472	0.00649164
Agpat1	chrX	1078.21	1240.01	1099.34	1209.25	1300.64	1116.09	1586.06	1751.86	1682.41	1160.59	1102.03	981.912	1139.19	1208.66	1673.44	1081.51	87.9501	92.2781	83.2623	91.0891	-0.554816	-0.469411	-0.629773	8.13762e-08	1.82168e-05	7.45963e-10
Agpat2	chr2L	2701.3	2662.04	2700.14	2402.5	2235.79	2352.84	2485.42	2559.56	2398.21	2262.85	2304.85	2171.88	2687.83	2330.38	2481.06	2246.53	22.3378	85.5929	80.7617	67.9685	0.115482	-0.0903947	-0.143262	0.107695	0.313448	0.0527143
Agpat3	chr3L	2477.35	2381.45	2714.07	2714.94	2450.91	2784.19	2819.27	2680.86	2591.72	2820.11	2706.11	2791.82	2524.29	2650.01	2697.28	2772.68	171.204	175.874	114.66	59.3612	-0.0956305	-0.025507	0.0397738	0.32234	0.872713	0.739757
Agpat4	chr3L	1802.02	1579.42	1794.73	1964.23	1788.63	1869.2	1256.97	1457.69	1424.08	1830.69	1906.47	1654.92	1725.39	1874.02	1379.58	1797.36	126.468	87.8955	107.508	129.045	0.322693	0.441906	0.381649	0.00176667	2.80383e-05	0.000193154
agt	chr3R	547.187	714.594	588.244	545.974	589.572	456.491	601.159	575.193	604.954	598.718	687.327	568.978	616.675	530.679	593.768	618.341	87.2499	67.8461	16.1987	61.5664	0.0546102	-0.16206	0.0585024	0.751815	0.42424	0.78074
Ahcy	chrX	18009.8	18949.9	17191.9	14956.7	14478.4	15014.9	15124	14164.5	15808.6	16807.1	17604.6	17742.4	18050.5	14816.7	15032.4	17384.7	879.666	294.415	825.896	504.94	0.263969	-0.0208522	0.209742	0.000124972	0.86973	0.00358356
AhcyL1	chr3L	2729.01	2193.86	3129.8	3672.53	3540.42	4321.58	3663.98	4118.34	3748.08	3263.78	3156.33	3163.35	2684.22	3844.85	3843.47	3194.49	469.575	418.119	241.731	60.1113	-0.517904	0.000517036	-0.266825	6.8908e-05	1	0.0659662
AhcyL2	chr3R	72.7274	53.2567	72.8609	67.1804	60.7499	56.3073	54.6508	51.555	59.1803	49.1255	38.3982	42.4611	66.2817	61.4125	55.1287	43.3283	11.2801	5.46677	3.83501	5.41601	0.265806	0.155729	-0.347495	0.422691	0.730552	0.31804
AIF	chr2L	4279.37	3958.49	4342.72	4664.24	4540.3	5188.31	4571.66	5421.37	4893.17	4134.22	4496.43	4420.2	4193.53	4797.62	4962.07	4350.28	206	343.979	429.022	190.956	-0.242777	-0.0486224	-0.189832	0.0107626	0.749927	0.0638429
AIMP1	chr2R	1852.82	1968.12	1793.66	1777.62	1756.77	1782.73	1704.87	1740.74	1802.65	1988.05	1987.11	1972.32	1871.53	1772.37	1749.42	1982.49	88.7192	13.7532	49.4652	8.82314	0.0973429	0.0188036	0.180438	0.203417	0.891634	0.0147113
AIMP2	chr3L	3953.83	4325.72	3629.11	2982.6	3003.63	2935.02	3586.76	3028.61	3454.06	3727.4	3472.15	3887.31	3969.55	2973.75	3356.47	3695.62	348.569	35.1527	291.591	209.395	0.24203	-0.174664	0.138871	0.0152622	0.150366	0.22398
AIMP3	chr2R	2034.06	2299.58	1960.81	1796.81	1486.88	1494.15	2098.12	1714.46	1950.13	1664.13	1668.4	1788.67	2098.15	1592.61	1920.9	1707.07	178.245	176.876	193.492	70.705	0.127334	-0.270387	-0.170264	0.330779	0.0479991	0.211797
Ak6	chr2R	941.992	1007.9	971.835	873.345	702.109	687.753	1145.29	622.704	765.586	689.293	758.364	858.775	973.91	754.403	844.527	768.811	33.0047	103.257	270.089	85.2229	0.205646	-0.162809	-0.135515	0.358448	0.589362	0.61068
Akap200	chr2L	15282	15443.7	15476.5	15668	15166.5	14199.5	15179.9	16018.5	15817.1	17024.3	16069.6	17047.1	15400.7	15011.3	15671.8	16713.7	104.129	746.441	437.772	557.864	-0.025174	-0.062119	0.0928569	0.752298	0.490258	0.20383
Akh	chr3L	1.1544	0	2.14297	1.06636	3.9836	4.02195	0	2.02177	2.81811	4.60552	0	5.30763	1.09912	3.02397	1.61329	3.30438	1.07255	1.69545	1.45278	2.88313	-0.553654	0.906435	1.03437	0.842957	0.724631	0.608904
AkhR	chr2L	12.6984	22.2566	19.2867	8.53085	8.96309	10.0549	7.12837	7.07618	3.75748	7.67587	5.75973	1.06153	18.0806	9.18294	5.98734	4.83237	4.89188	0.785438	1.9313	3.40329	1.59445	0.61704	-0.309184	0.0138877	0.591499	0.844531
akirin	chr3L	14988.8	16023.9	15730.4	17048.9	15818.9	15247.2	16307.3	15601	14679.5	15579.7	15879.6	16519.5	15581	16038.3	15529.3	15992.9	533.507	920.675	816.267	480.033	0.00480169	0.0465332	0.042443	0.960107	0.690366	0.674284
Akt1	chr3R	4865.81	4959.24	5229.91	6043.04	5833.98	5589.5	5917.73	6476.73	5572.34	5004.66	5333.51	5712.08	5018.32	5822.17	5988.93	5350.08	189.105	226.998	456.38	353.997	-0.255095	-0.0407413	-0.162738	0.00339692	0.778034	0.0890835
al	chr2L	0	0	0	0	0	1.00549	0	1.01088	0	0	0	0	0	0.335162	0.336961	0	0	0.580518	0.583634	0	#NUM!	-0.00772156	#NUM!	NA	NA	NA
Aladin	chrX	3640.99	4227.95	3443.75	2709.61	2767.6	2766.1	3548.74	2818.34	3215.46	3101.82	2996.02	3255.7	3770.89	2747.77	3194.18	3117.85	407.923	33.0558	365.663	130.583	0.239461	-0.217185	-0.0348963	0.0336424	0.100286	0.837345
AlaRS	chr2L	11801.5	12737.1	12454.9	11566.8	10809.5	12517.3	10602.3	10865	12054	11136.9	11885.2	12564.2	12331.2	11631.2	11173.7	11862.1	479.945	855.731	773.551	713.939	0.142197	0.0578864	0.086249	0.139675	0.683337	0.440681
AlaRS-m	chr3L	1563.06	1778.14	1690.8	1801.08	1685.06	1848.09	1631.21	1658.86	1728.44	1588.14	1671.28	1741.97	1677.33	1778.07	1672.84	1667.13	108.17	83.9107	50.0998	76.9986	0.00387398	0.0880197	-0.00493116	0.966436	0.47184	0.964724
Alas	chr2R	1645.02	1426.8	1661.87	1543.02	1522.73	1729.44	1228.46	1526.43	1408.11	1644.94	1547.45	1426.69	1577.9	1598.39	1387.67	1539.69	131.123	113.939	150.038	109.329	0.185343	0.203962	0.14998	0.143911	0.157067	0.277783
alc	chr2R	2413.86	2681.91	2242.61	2293.73	2308.49	2238.21	2588.79	2850.69	2788.99	2482.38	2718.59	2465.93	2446.13	2280.15	2742.82	2555.63	221.421	37.0569	136.92	141.367	-0.165161	-0.266534	-0.101981	0.0884871	0.00810537	0.35411
Ald1	chr3R	11008.4	11901.7	11673.8	10426.8	9490.92	10111.2	7933.87	7780.77	7892.58	10009.3	10371.3	11048.4	11528	10009.6	7869.07	10476.3	464.17	476.145	79.2129	527.42	0.550872	0.347125	0.41287	6.39023e-17	9.69275e-07	8.58406e-10
Ald2	chr3R	0	0	0	0	0	0	0	1.01088	0	0	0	0	0	0	0.336961	0	0	0	0.583634	0	#NUM!	#NUM!	#NUM!	NA	NA	NA
Aldh	chr2L	17465	19930.7	17962.3	14445.9	13117	13490.6	12389.1	11030.8	12949.2	12814.1	12490.9	13989.9	18452.7	13684.5	12123	13098.3	1303.97	685.355	986.514	788.849	0.606081	0.174795	0.111629	8.58887e-12	0.125134	0.32261
Aldh-III	chr2R	3025.69	3100.81	3009.8	3103.1	3043.47	3051.65	2492.55	2929.54	3049.19	2967.49	3035.38	2949.98	3045.43	3066.07	2823.76	2984.28	48.6155	32.3232	293.008	45.105	0.109029	0.118774	0.079766	0.254094	0.29345	0.46362
Aldh7A1	chr3L	68.1098	71.5389	76.0753	50.1187	34.8565	39.214	41.5821	36.3918	44.1504	19.1897	18.2391	29.7228	71.908	41.3964	40.7081	22.3839	3.99558	7.8617	3.95244	6.37342	0.820836	0.0241895	-0.862858	0.00664593	0.977007	0.0178124
Alg-2	chr3R	2858.3	3323.38	2875.86	2615.77	2325.42	2394.07	4027.53	2251.24	2717.6	2331.16	2577.48	2549.79	3019.18	2445.09	2998.79	2486.14	263.591	151.749	920.925	134.93	0.00977813	-0.294493	-0.27047	0.965455	0.184699	0.187691
Alg1	chr3R	1560.75	1819.47	1748.66	1651.79	1668.13	1681.17	1659.72	1752.87	1705.89	2058.67	2252.05	2000.98	1709.63	1667.03	1706.16	2103.9	133.704	14.7256	46.5756	131.507	0.00292784	-0.0334747	0.302311	0.972867	0.826202	0.000621435
Alg10	chr3L	1415.3	1647.78	1334	1579.27	1599.41	1500.19	1498.15	1583.04	1635.44	1807.67	1727.92	1630.51	1465.69	1559.62	1572.21	1722.03	162.848	52.4504	69.2864	88.7272	-0.101213	-0.0115951	0.131316	0.390064	0.952081	0.26841
Alg11	chr3L	3096.11	3411.61	3380.53	3128.69	2968.78	2704.76	2991.54	2639.42	2793.68	2441.69	2529.48	2787.57	3296.08	2934.07	2808.21	2586.25	173.879	214.083	176.51	179.791	0.2311	0.0632534	-0.118792	0.0173182	0.671058	0.297204
Alg14	chrX	210.101	275.027	244.298	229.267	194.2	209.141	206.723	129.393	178.48	278.634	266.867	256.89	243.142	210.869	171.532	267.464	32.4785	17.5968	39.1302	10.8845	0.503323	0.297872	0.640865	0.00864622	0.222063	0.000822625
Alg2	chr3L	1304.47	1384.68	1275.06	1147.4	1090.51	1097.99	1040.74	903.73	1075.58	1151.38	1117.39	1164.5	1321.41	1111.97	1006.68	1144.42	56.7327	30.9123	90.8457	24.313	0.392463	0.143504	0.185008	1.48113e-05	0.230137	0.071148
Alg3	chr2R	1320.64	1505.5	1381.14	1523.82	1463.97	1502.2	1207.07	1217.1	1255.94	1531.34	1462.97	1430.94	1402.42	1496.66	1226.7	1475.08	94.25	30.3067	25.809	51.2825	0.193137	0.286964	0.266008	0.0215204	0.00114037	0.00144189
Alg9	chr3R	3504.77	3360.74	3667.69	4154.52	3675.86	3615.73	3729.32	3919.19	3453.12	3849.45	4101.88	3534.88	3511.06	3815.37	3700.55	3828.74	153.571	295.247	234.365	284.067	-0.0758301	0.0440857	0.0491308	0.500003	0.782761	0.710857
Alh	chr3R	3343.15	2734.38	3485.53	4168.39	4601.05	5107.88	3977.63	4842.13	4194.28	3703.61	3656.47	3520.02	3187.69	4625.77	4338.01	3626.7	398.981	470.233	449.816	95.3424	-0.444525	0.0926592	-0.258378	0.000236324	0.617979	0.0528677
alien	chr2L	5176.34	5886.06	5076.69	4585.33	4620.97	4069.21	5286.87	4995.78	5248.26	5234.17	4921.69	5263.05	5379.7	4425.17	5176.97	5139.64	441.348	308.788	158.095	189.302	0.0554166	-0.226375	-0.010442	0.599935	0.024157	0.943024
ALiX	chr3R	3885.72	4505.36	4344.86	4464.83	4175.81	4423.14	4514.63	4715.77	4734.42	4560.23	4413.87	4946.72	4245.31	4354.59	4654.94	4640.27	321.593	156.231	121.868	275.293	-0.132891	-0.0962255	-0.00455347	0.141077	0.400676	0.972129
Alk	chr2R	11.544	1.58975	5.35742	5.33178	1.9918	3.01646	7.12837	16.1741	4.69685	0.767587	1.91991	1.06153	6.16373	3.44668	9.33312	1.24967	5.02588	1.71105	6.04795	0.598758	-0.598555	-1.43715	-2.90081	0.481437	0.21179	0.0271467
AlkB	chrX	900.434	1077.06	833.614	857.35	931.166	828.521	1243.9	894.632	959.096	928.012	1026.19	831.176	937.035	872.346	1032.54	928.46	125.782	52.9397	185.857	97.5085	-0.140026	-0.243229	-0.15329	0.443959	0.215497	0.427744
Alp1	chr3L	1.1544	1.58975	2.14297	0	0.995899	1.00549	0	0	3.75748	13.049	19.1991	4.24611	1.62904	0.667129	1.25249	12.1647	0.495451	0.57777	2.16938	7.5156	0.379221	-0.908765	3.27983	0.929722	0.889145	0.00205079
Alp10	chr3L	2.30881	2.38463	4.28593	2.13271	1.9918	5.02744	5.94031	2.02177	4.69685	7.67587	6.71968	8.49222	2.99312	3.05065	4.21964	7.62925	1.12025	1.7134	2.00238	0.887187	-0.495468	-0.468004	0.854422	0.719645	0.808772	0.359747
Alp11	chrX	0	0.794877	2.14297	2.13271	0	1.00549	2.37612	1.01088	0	1.53517	1.91991	1.06153	0.979281	1.04607	1.129	1.50554	1.08332	1.06693	1.19246	0.429958	-0.205253	-0.110074	0.41523	NA	NA	0.855641
Alp12	chr2L	184.704	240.053	226.083	119.432	143.409	120.658	123.558	82.8924	100.513	116.673	101.755	147.552	216.947	127.833	102.321	121.994	28.7831	13.5033	20.3932	23.3575	1.08424	0.32116	0.253701	3.60406e-07	0.277418	0.368565
Alp13	chr3R	0	0	2.14297	0	0.995899	0	0	1.01088	3.75748	3.07035	0.959954	2.12305	0.714322	0.331966	1.58945	2.05112	1.23724	0.574983	1.94441	1.05703	-1.15388	-2.25942	0.36788	NA	NA	0.869244
Alp2	chr2R	2.30881	6.35901	18.2152	2.13271	25.8934	5.02744	0	5.05442	7.51495	11.5138	1.91991	8.49222	8.96101	11.0178	4.18979	7.30864	8.26627	12.9636	3.83136	4.90523	1.09678	1.39489	0.802725	0.511368	0.437408	0.707001
Alp4	chr3R	1093.22	1685.14	1157.2	1247.64	1457	965.268	1564.68	2252.25	1946.37	1134.49	1558.97	1233.49	1311.85	1223.3	1921.1	1308.98	324.854	246.768	344.482	222.077	-0.550326	-0.651152	-0.553484	0.0105236	0.00485337	0.0126064
Alp5	chr3R	0	0.794877	4.28593	0	0	0	0	0	0	3.07035	0	1.06153	1.6936	0	0	1.37729	2.27993	0	0	1.55934	#DIV/0!	#DIV/0!	#DIV/0!	NA	NA	NA
Alp6	chr2R	0	3.17951	2.14297	0	0	0	0	0	3.75748	0	1.91991	0	1.77416	0	1.25249	0.63997	1.62152	0	2.16938	1.10846	0.502333	#NUM!	-0.968727	NA	NA	NA
Alp7	chr2R	0	0	0	0	0	1.00549	0	0	0	0	0	0	0	0.335162	0	0	0	0.580518	0	0	#DIV/0!	#DIV/0!	#DIV/0!	NA	NA	NA
Alp8	chr2R	0	0	1.07148	0	0	0	0	0	0	0	0	0	0.357161	0	0	0	0.618621	0	0	0	#DIV/0!	#DIV/0!	#DIV/0!	NA	NA	NA
Alp9	chr3L	0	3.17951	0	2.13271	1.9918	1.00549	9.50449	6.0653	9.39369	2.30276	0	3.18458	1.05984	1.71	8.32116	1.82911	1.83569	0.61418	1.95442	1.64428	-2.97294	-2.28279	-2.18564	0.0160227	0.0582613	0.0449419
alph	chr3R	9247.92	9857.27	8941.53	8694	8581.66	7975.52	8498.2	8328.67	7839.04	8289.17	8038.66	7939.16	9348.9	8417.06	8221.97	8088.99	466.148	386.486	342.291	180.352	0.185313	0.033833	-0.0235234	0.0104722	0.775265	0.832105
alpha-Cat	chr3L	5849.36	5730.27	6165.31	7328	6348.86	6482.38	7447.96	7180.3	5943.39	6051.65	7380.13	6486.99	5914.98	6719.74	6857.22	6639.59	224.824	530.977	802.633	677.257	-0.21325	-0.0292168	-0.0465287	0.0790118	0.892921	0.781052
alpha-Catr	chr2R	1.1544	2.38463	1.07148	0	0	2.01097	2.37612	4.04353	3.75748	1.53517	0.959954	1.06153	1.53684	0.670325	3.39238	1.18555	0.735379	1.16104	0.891649	0.307011	-1.14233	-2.33936	-1.51674	0.400636	NA	0.32221
alpha-Est1	chr3R	1676.19	1658.91	1630.8	1790.41	1714.94	1923.5	1995.94	1777.13	1921.95	1922.04	1938.15	1805.66	1655.3	1809.62	1898.34	1888.61	22.9118	105.597	111.299	72.2927	-0.197648	-0.0690564	-0.00741186	0.0206535	0.576975	0.963597
alpha-Est10	chr3R	322.078	280.592	319.302	463.865	425.249	349.91	364.735	296.189	325.961	452.109	459.818	432.041	307.324	413.008	328.962	447.989	23.1925	57.9555	34.3714	14.3391	-0.0981589	0.32825	0.445545	0.58028	0.0540849	0.00260286
alpha-Est2	chr3R	24.2425	30.2053	16.0722	12.7963	9.95899	14.0768	9.50449	17.185	12.2118	33.7738	24.9588	35.0304	23.5067	12.2774	12.9671	31.2543	7.09521	2.10739	3.89557	5.48817	0.858214	-0.0788555	1.2692	0.101741	0.936273	0.00996216
alpha-Est3	chr3R	1043.58	1114.42	1060.77	1011.97	900.293	917.004	848.276	842.066	861.402	1246.56	1113.55	1197.4	1072.92	943.09	850.581	1185.84	36.9495	60.236	9.87192	67.2568	0.335024	0.148946	0.479385	0.000196634	0.202198	4.26833e-08
alpha-Est4	chr3R	53.1025	63.5901	45.0023	70.3795	53.7786	56.3073	54.6508	41.4462	37.5748	43.7524	44.1579	63.6916	53.8983	60.1551	44.5573	50.534	9.31945	8.94439	8.95304	11.3966	0.27458	0.433027	0.181593	0.425263	0.281384	0.680868
alpha-Est5	chr3R	1062.05	975.314	1078.98	999.175	978.969	933.092	572.646	449.843	472.503	1497.56	1461.05	1555.14	1038.78	970.412	498.33	1504.58	55.6137	33.8624	65.3484	47.4346	1.05972	0.961495	1.59419	4.89891e-26	5.47136e-21	8.85988e-61
alpha-Est6	chr3R	1.1544	0.794877	0	0	0.995899	1.00549	0	0	1.87874	1.53517	2.87986	0	0.64976	0.667129	0.626246	1.47168	0.590725	0.57777	1.08469	1.44098	0.0531766	0.0912355	1.23266	NA	NA	NA
alpha-Est7	chr3R	154.69	212.232	185.367	194.077	127.475	176.966	168.705	107.154	135.269	70.618	66.2368	94.4759	184.096	166.173	137.042	77.1102	28.7921	34.5878	30.8138	15.1978	0.425837	0.278059	-0.829629	0.0997614	0.416122	0.00203995
alpha-Est8	chr3R	176.624	169.309	170.366	259.124	207.147	280.531	166.329	150.622	180.359	207.248	167.992	246.274	172.099	248.934	165.77	207.172	3.95356	37.7383	14.8765	39.1412	0.0540617	0.586584	0.321646	0.843544	0.00545957	0.148309
alpha-Est9	chr3R	570.275	569.132	603.245	662.207	533.802	698.814	522.747	469.05	389.838	604.091	478.057	532.887	580.884	631.608	460.545	538.345	19.3737	86.6571	66.8613	63.1937	0.334908	0.455686	0.225188	0.0363416	0.00732848	0.203167
alpha-Man-Ia	chrX	1002.02	922.852	1062.91	1203.92	1176.16	1294.06	1538.54	1432.42	1276.6	846.648	898.517	968.113	995.928	1224.71	1415.85	904.426	70.2281	61.6422	131.752	60.9475	-0.507559	-0.209231	-0.646599	1.27155e-06	0.107528	3.63587e-10
alpha-Man-Ib	chr3R	3729.87	3051.53	3836.98	4530.95	4137.96	4668.48	3925.35	4022.3	3899.32	3992.22	3722.7	3798.14	3539.46	4445.79	3948.99	3837.69	425.94	275.318	64.8096	139.041	-0.157955	0.170956	-0.0412476	0.142585	0.169543	0.779114
alpha-Man-Ic	chr3R	11.544	7.15389	3.21445	8.53085	4.9795	5.02744	7.12837	10.1088	15.0299	2.30276	1.91991	7.43069	7.30412	6.17926	10.7557	3.88445	4.16682	2.03668	3.99029	3.07709	-0.558319	-0.799596	-1.46932	0.49329	0.4355	0.11235
alpha-Man-IIa	chr3R	1298.7	998.365	1300.78	1215.65	1345.46	1500.19	1249.84	1591.13	1397.78	1314.88	1397.69	1115.66	1199.28	1353.76	1412.92	1276.08	174.003	142.452	171.148	144.962	-0.236505	-0.0617007	-0.146961	0.139191	0.808983	0.429279
alpha-Man-IIb	chr3R	1618.47	1224.11	1654.37	2133.78	2330.4	2616.28	2469.98	2881.02	2376.6	2096.28	2109.98	1921.36	1498.98	2360.15	2575.87	2042.54	238.723	242.622	268.36	105.166	-0.781073	-0.126177	-0.334693	3.05346e-09	0.526687	0.0218801
alpha-PheRS	chrX	4436.37	5122.19	4237.72	4147.06	3814.29	4157.69	4440.97	3918.18	4607.61	4374.48	4291	4780.06	4598.76	4039.68	4322.25	4481.84	464.058	195.263	359.717	261.612	0.0894601	-0.0975427	0.052308	0.455014	0.513925	0.721601
alpha-Spec	chr3L	4057.72	3686.64	4354.51	4906.3	4523.37	6005.78	5421.12	6553.56	6837.67	4136.52	4150.84	4668.6	4032.96	5145.15	6270.78	4318.65	334.622	769.522	749.414	303.143	-0.636808	-0.285432	-0.538064	7.44159e-07	0.0681757	4.41278e-05
alpha4GT1	chr2L	2038.67	2094.5	2086.18	2224.42	2090.39	2106.5	2221.67	2066.25	2137.07	2103.95	2086.94	2138.98	2073.12	2140.44	2141.66	2109.96	30.1172	73.1756	77.8165	26.5323	-0.0469286	-0.000826185	-0.0215167	0.570895	0.999806	0.83838
alpha4GT2	chr3R	0	0	0	0	0	0	0	0	0	0	0	0	0	0	0	0	0	0	0	0	#DIV/0!	#DIV/0!	#DIV/0!	NA	NA	NA
alphaCOP	chr3L	5994.81	5983.04	6434.26	6591.15	6123.78	7362.18	6059.11	5506.28	6358.59	5551.95	5236.55	6795.9	6137.37	6692.37	5974.66	5861.47	257.179	625.371	432.385	824.462	0.0387634	0.16366	-0.0275952	0.801702	0.288614	0.879847
alphaKap4	chr3L	0	0	0	0	0	0	0	0	0	0	0	0	0	0	0	0	0	0	0	0	#DIV/0!	#DIV/0!	#DIV/0!	NA	NA	NA
alphaSnap	chr3L	3605.2	3863.1	3551.97	2995.39	3073.34	2911.89	3466.76	3012.43	3145.01	3293.71	3173.61	3596.45	3673.42	2993.54	3208.07	3354.59	166.409	80.7428	233.637	217.897	0.19542	-0.0998505	0.0644328	0.0268951	0.405121	0.565717
alphaTry	chr2R	0	0	0	0	2.9877	0	0	0	0	0	0.959954	0	0	0.995899	0	0.319985	0	1.72495	0	0.55423	#DIV/0!	#DIV/0!	#DIV/0!	NA	NA	NA
alphaTub67C	chr3L	29627.7	34645.5	29696.2	24837.6	26109.5	24039.2	21335.2	23341.3	24893.3	32412.1	30517.9	32441.3	31323.1	24995.4	23189.9	31790.4	2877.46	1044.14	1783.86	1102.15	0.43373	0.108165	0.455095	1.17424e-06	0.3917	3.6617e-07
alphaTub84B	chr3R	72413.4	82235.6	77365.4	76735	72641.9	79257.5	63118.1	67065	75127.9	86209.2	85934.1	93445.2	77338.1	76211.5	68437	88529.5	4911.16	3338.75	6121.33	4259.31	0.176402	0.155231	0.371381	0.061946	0.163586	3.12378e-05
alphaTub84D	chr3R	6037.53	6083.19	6662.48	6499.44	5769.24	6504.5	5812	5506.28	6076.78	5452.17	5043.6	6643.04	6261.07	6257.73	5798.35	5712.93	348.385	423.046	285.494	830.992	0.110766	0.109996	-0.021411	0.394822	0.498746	0.905014
alphaTub85E	chr3R	1.1544	0	0	1.06636	0	0	0	0	2.81811	0	0	0	0.384801	0.355452	0.939369	0	0.666495	0.615661	1.62704	0	-1.28758	-1.40204	#NUM!	NA	NA	NA
Alr	chrX	990.477	1032.55	1115.41	1121.81	1083.54	1147.26	888.67	977.524	1016.4	1162.13	1217.22	1111.42	1046.15	1117.54	960.864	1163.59	63.569	32.0753	65.4734	52.9168	0.12268	0.217916	0.276178	0.24511	0.0472346	0.00428083
alrm	chr3R	4.61761	1.58975	3.21445	4.26542	3.9836	5.02744	13.0687	16.1741	12.2118	5.37311	2.87986	3.18458	3.1406	4.42549	13.8182	3.81252	1.51528	0.540014	2.08479	1.36007	-2.13746	-1.64266	-1.85775	0.00345405	0.0334412	0.0119529
Als2	chr3L	1798.56	1397.39	1779.73	2377.97	2331.4	2890.78	2110	2386.7	2038.43	1978.07	1743.28	1992.49	1658.56	2533.38	2178.37	1904.61	226.374	310.386	183.925	139.905	-0.393319	0.217813	-0.193755	0.00349155	0.193633	0.213562
alt	chr3R	12441	11648.1	12992.8	13993.8	12992.5	13820.4	12675.4	14231.2	13428.3	11030.2	11194	12003.7	12360.6	13602.2	13445	11409.3	675.931	535.115	778.029	521.254	-0.121313	0.0167769	-0.236853	0.152054	0.913826	0.00334877
aly	chr3L	43.8673	13.5129	35.3589	5.33178	4.9795	13.0713	13.0687	14.1524	2.81811	0	1.91991	0	30.913	7.7942	10.013	0.63997	15.658	4.57352	6.25452	1.10846	1.62633	-0.361408	-3.96773	0.0107162	0.821855	0.0481039
Ama	chr3R	0	8.74365	0	0	7.96719	1.00549	0	6.0653	3.75748	0.767587	0	0	2.91455	2.99089	3.27426	0.255862	5.04815	4.33883	3.06139	0.443166	-0.167896	-0.130592	-3.67773	0.955549	0.969132	0.478237
Amacr	chr2L	622.223	690.748	609.674	637.681	618.453	543.969	488.293	515.55	571.137	690.06	606.691	635.855	640.882	600.034	524.993	644.202	43.639	49.4969	42.2212	42.3068	0.287759	0.192746	0.295214	0.0191278	0.211285	0.0201123
amd	chr2L	1147.48	1157.34	1082.2	1527.02	1486.88	1599.73	1170.24	904.74	1157.3	1359.4	789.082	1284.45	1129	1537.88	1077.43	1144.31	40.835	57.2041	149.692	309.909	0.0674604	0.513348	0.0868849	0.773476	0.0114788	0.736492
amn	chrX	0	0	1.07148	0	0	0	0	2.02177	0.939369	0.767587	0	0	0.357161	0	0.987045	0.255862	0.618621	0	1.01173	0.443166	-1.46654	#NUM!	-1.94775	NA	NA	NA
Amnionless	chr2L	0	0	0	0	0.995899	0	1.18806	0	0.939369	0	0	0	0	0.331966	0.709143	0	0	0.574983	0.626598	0	#NUM!	-1.09504	#NUM!	NA	NA	NA
amon	chr3R	1.1544	0.794877	0	1.06636	0	0	0	0	0	0	0	0	0.64976	0.355452	0	0	0.590725	0.615661	0	0	#DIV/0!	#DIV/0!	#DIV/0!	NA	NA	NA
amos	chr2L	0	0	0	0	0	0	0	0	0	0	0	0	0	0	0	0	0	0	0	0	#DIV/0!	#DIV/0!	#DIV/0!	NA	NA	NA
AMPdeam	chrX	3818.76	3557.07	3784.48	4021.23	3956.71	4596.08	3604.58	4133.5	4059.01	4329.19	4288.12	5086.84	3720.11	4191.34	3932.36	4568.05	142.226	351.999	286.304	449.754	-0.0800537	0.0920142	0.21618	0.514776	0.550067	0.0582412
Amph	chr2R	3218.47	3062.66	3275.52	3862.34	3689.81	3252.75	3744.77	3786.77	3326.31	3699.77	3662.23	3475.44	3185.55	3601.63	3619.28	3612.48	110.184	314.215	254.591	120.154	-0.184159	-0.00705212	-0.00271471	0.055796	0.97298	0.99027
AMPKalpha	chrX	3665.23	3890.13	3873.41	4070.28	3979.61	4202.94	3748.33	4132.49	4075.92	4068.98	3984.77	3865.02	3809.59	4084.28	3985.58	3972.92	125.299	112.318	207.401	102.493	-0.0651552	0.0352901	-0.00459002	0.415468	0.760515	0.967386
Amt	chr3R	1.1544	0.794877	2.14297	2.13271	0	1.00549	4.75224	1.01088	1.87874	0.767587	0	0	1.36408	1.04607	2.54729	0.255862	0.698076	1.06693	1.95823	0.443166	-0.901032	-1.28399	-3.31552	0.571017	NA	0.229496
Amun	chrX	10172.6	9831.04	10081.6	11095.4	11545.5	11188.1	10125.8	12308.5	11701.7	11400.2	10783.2	11355.2	10028.4	11276.3	11378.7	11179.5	176.88	237.641	1126.62	343.978	-0.182243	-0.0130392	-0.0254786	0.0328022	0.936041	0.840254
amx	chrX	845.023	941.929	900.046	823.227	769.83	836.565	761.547	731.879	860.462	876.584	869.719	885.313	895.666	809.874	784.63	877.205	48.6014	35.3146	67.3274	7.81599	0.190949	0.0456857	0.160903	0.066983	0.795226	0.158758
Amy-d	chr2R	2.30881	3.17951	2.14297	2.13271	0	4.02195	2.37612	3.03265	1.87874	3.07035	2.87986	2.12305	2.54376	2.05155	2.42917	2.69109	0.556783	2.0122	0.578782	0.501067	0.0664987	-0.243747	0.147726	0.958715	0.929398	0.933992
Amy-p	chr2R	2.30881	1.58975	2.14297	1.06636	0.995899	2.01097	0	2.02177	0.939369	0	1.91991	1.06153	2.01384	1.35774	0.987045	0.993812	0.376515	0.566811	1.01173	0.961744	1.02876	0.460023	0.00985654	0.610667	NA	0.978988
Amyrel	chr2R	0	6.35901	0	4.26542	1.9918	10.0549	8.31643	3.03265	4.69685	3.07035	0.959954	0	2.11967	5.43736	5.34864	1.34343	3.67138	4.15733	2.70152	1.57068	-1.33533	0.0237351	-1.99325	0.445227	0.989108	0.329746
ana	chr2R	192.785	166.129	190.724	168.484	190.217	181.993	225.732	409.408	327.84	234.114	232.309	195.321	183.213	180.231	320.993	220.581	14.8307	10.9729	92.0293	21.8947	-0.809022	-0.832692	-0.541232	9.91261e-05	0.00017792	0.0141972
ana1	chr3R	913.132	893.442	1078.98	1311.62	1784.65	1464.99	1173.8	1960.1	1600.69	1981.14	2053.34	1347.08	961.852	1520.42	1578.2	1793.85	101.915	241.338	393.631	388.6	-0.71439	-0.0538065	0.184784	0.00056317	0.889145	0.480117
ana2	chr2R	1443	1485.62	1576.15	1207.11	1295.66	1124.13	954.013	1182.73	1081.21	1403.15	1515.77	1334.34	1501.59	1208.97	1072.65	1417.75	67.9954	85.7801	114.6	91.5916	0.48531	0.172596	0.402421	4.6061e-06	0.215538	0.000224046
ana3	chr2R	2369.99	2302.76	2607.99	3670.4	3798.36	4116.46	3669.92	4580.31	3868.32	3936.18	4579.94	3388.39	2426.91	3861.74	4039.52	3968.17	160.38	229.689	478.732	596.418	-0.735061	-0.0649322	-0.0257083	3.28664e-09	0.759594	0.901523
Ance	chr2L	317.461	372.797	338.589	340.168	328.647	304.663	222.167	271.928	338.173	433.686	394.541	472.379	342.949	324.492	277.423	433.536	27.9248	18.1134	58.1976	38.9194	0.305908	0.226099	0.644065	0.0873562	0.324204	0.000105209
Ance-2	chr2L	0	0	1.07148	3.19907	0	1.00549	1.18806	1.01088	0.939369	0.767587	1.91991	1.06153	0.357161	1.40152	1.0461	1.24967	0.618621	1.63589	0.128033	0.598758	-1.55038	0.421964	0.256525	NA	NA	0.929569
Ance-3	chr2L	4.61761	5.56414	1.07148	4.26542	3.9836	2.01097	3.56418	6.0653	6.57558	17.6545	2.87986	24.4151	3.75108	3.42	5.40169	14.9832	2.36836	1.22836	1.61165	11.0133	-0.526106	-0.659415	1.47186	0.729801	0.737615	0.0833046
Ance-4	chr2R	21.9336	24.6412	19.2867	11.7299	13.9426	20.1097	22.5732	21.2285	17.848	10.7462	7.67963	7.43069	21.9538	15.2607	20.5499	8.61885	2.6773	4.34264	2.43458	1.84655	0.0953414	-0.429306	-1.25357	0.852133	0.546526	0.029739
Ance-5	chr2R	10.3896	13.5129	6.4289	10.6636	18.9221	16.0878	16.6329	12.1306	15.9693	3.83793	5.75973	6.36916	10.1105	15.2245	14.9109	5.32227	3.55024	4.1964	2.43057	1.3211	-0.560518	0.0300245	-1.48625	0.42052	0.973579	0.0378777
anchor	chr3L	1119.77	965.775	1283.64	1686.98	1567.55	2030.08	1835.55	1872.16	1622.29	1470.7	1395.77	1503.12	1123.06	1761.53	1776.67	1456.53	158.956	240.111	134.941	55.0584	-0.661737	-0.0123418	-0.286637	3.68765e-07	0.966466	0.0491066
Andorra	chrX	0	0	0	0	0	0	0	0	0	0	0	0	0	0	0	0	0	0	0	0	#DIV/0!	#DIV/0!	#DIV/0!	NA	NA	NA
angel	chr2R	424.82	421.285	390.02	345.499	364.499	314.718	266.126	337.635	271.478	389.166	413.74	395.95	412.042	341.572	291.746	399.619	19.1531	25.1221	39.8309	12.6912	0.498076	0.227476	0.453911	0.000200962	0.189518	0.00099291
Ank	chr4	7711.41	6810.5	8221.49	10570.8	9158.29	10545.6	11551.5	12157.9	10040	9019.91	10055.5	8829.78	7581.13	10091.5	11249.8	9301.74	714.457	808.319	1090.72	659.682	-0.569413	-0.156752	-0.274327	1.42576e-07	0.283957	0.0212493
Ank2	chr3L	1.1544	2.38463	5.35742	0	3.9836	6.03292	5.94031	8.08707	11.2724	6.90828	5.75973	6.36916	2.96548	3.33884	8.43327	6.34572	2.16087	3.06771	2.68287	0.574635	-1.50782	-1.33674	-0.410307	0.139109	0.260838	0.698987
Ankle2	chrX	5460.32	5436.16	5621	6174.2	5836.97	6651.3	6643.64	6728.44	6317.26	5683.21	5655.09	6151.55	5505.83	6220.82	6563.11	5829.95	100.47	409.163	217.096	278.867	-0.25342	-0.077275	-0.170896	0.000696314	0.46916	0.034199
anne	chr4	6012.13	4982.29	5754.94	8150.16	7138.61	8241.98	10983.6	8194.22	6968.24	6738.64	7352.29	6622.87	5583.12	7843.58	8715.36	6904.6	535.989	612.25	2057.8	392.009	-0.64249	-0.152048	-0.336003	1.90654e-05	0.488574	0.0432482
anox	chrX	0	0	0	0	0	0	0	0	0	0	0	0	0	0	0	0	0	0	0	0	#DIV/0!	#DIV/0!	#DIV/0!	NA	NA	NA
Anp	chr3R	0	0	0	0	0	0	0	0	0	0	0	0	0	0	0	0	0	0	0	0	#DIV/0!	#DIV/0!	#DIV/0!	NA	NA	NA
Ant2	chrX	95.8154	70.744	91.0761	57.5832	55.7704	118.647	47.5224	41.4462	62.9377	72.1531	84.476	68.9993	85.8785	77.3337	50.6355	75.2095	13.3193	35.7903	11.0788	8.17851	0.762149	0.610949	0.570766	0.0355029	0.157868	0.154357
antdh	chrX	0	0	0	0	0	0	0	0	0	0	0	0	0	0	0	0	0	0	0	0	#DIV/0!	#DIV/0!	#DIV/0!	NA	NA	NA
Antp	chr3R	5.77201	6.35901	7.50038	8.53085	14.9385	7.03841	23.7612	29.3156	20.6661	7.67587	8.63959	5.30763	6.5438	10.1692	24.581	7.2077	0.878877	4.19715	4.38263	1.7146	-1.90934	-1.27333	-1.76993	0.000626865	0.0302248	0.00158279
antr	chr2R	6.92642	5.56414	2.14297	1.06636	0	1.00549	0	1.01088	0	0.767587	0	0	4.87784	0.690614	0.336961	0.255862	2.46447	0.598863	0.583634	0.443166	3.85559	1.0353	-0.397215	0.0200258	NA	0.964724
AnxB10	chrX	1611.55	1669.24	1526.86	1339.34	1445.05	1416.73	1449.43	1285.84	1563.11	1243.49	1126.03	1126.28	1602.55	1400.37	1432.8	1165.27	71.614	54.7187	139.38	67.7447	0.161536	-0.0330205	-0.298175	0.129054	0.853068	0.0039682
AnxB11	chrX	1587.3	1453.03	1598.65	1551.55	1406.21	1477.06	1330.63	1263.6	1408.11	1718.63	1766.32	1731.35	1546.33	1478.27	1334.12	1738.76	80.9953	72.6767	72.3183	24.694	0.212965	0.148029	0.382179	0.0147276	0.160223	3.71559e-06
AnxB9	chr3R	5534.21	5984.63	5209.55	4426.44	4138.96	4299.46	6944.22	5575.02	6700.52	5722.36	5282.63	5852.2	5576.13	4288.29	6406.59	5619.06	389.235	144.069	730.392	298.505	-0.200292	-0.579154	-0.189227	0.0625951	9.58202e-09	0.0961062
aop	chr2L	2219.92	1871.14	2340.12	2669.09	2729.76	3125.05	2588.79	3031.64	2758.93	2393.33	2377.81	2370.39	2143.73	2841.3	2793.12	2380.51	243.596	247.603	223.398	11.7092	-0.381756	0.0246755	-0.230605	0.00051601	0.909476	0.0563963
aos	chr3L	379.798	267.873	337.517	231.399	245.987	298.63	281.571	308.319	259.266	196.502	141.113	191.075	328.396	258.672	283.052	176.23	56.5172	35.3647	24.5603	30.5329	0.214371	-0.129943	-0.683606	0.330804	0.67097	0.00061922
Aos1	chr3R	5541.13	6835.15	5424.92	5491.73	4844.05	4611.16	6460.68	5429.45	5640.91	5766.88	5956.52	5801.24	5933.73	4982.32	5843.68	5841.55	782.807	456.276	544.694	101.039	0.0220624	-0.230061	-0.000527105	0.886434	0.101423	1
AOX1	chr3R	361.328	354.515	400.735	454.268	425.249	569.106	838.771	779.391	800.343	634.027	690.207	633.732	372.193	482.874	806.168	652.655	24.9518	76.0753	30.1157	32.5214	-1.11503	-0.739434	-0.30476	4.71244e-20	5.35539e-09	0.023892
AOX2	chr3R	71.573	85.8467	80.3612	57.5832	47.8032	42.2305	111.678	127.371	146.542	96.7159	67.1968	95.5374	79.2603	49.2056	128.53	86.4834	7.20028	7.77187	17.4608	16.7131	-0.697437	-1.38521	-0.571613	0.0042517	4.41423e-08	0.0243819
AOX3	chr3R	2790.19	3113.53	3104.09	4634.38	4129.99	4633.29	3482.21	3477.44	3707.69	3841	3728.46	4702.56	3002.6	4465.89	3555.78	4090.68	184.015	290.893	131.581	532.89	-0.243952	0.328781	0.202174	0.0294937	0.00545957	0.0928862
AOX4	chr3R	0	0	0	0	0.995899	0	0	0	0	0	0	0	0	0.331966	0	0	0	0.574983	0	0	#DIV/0!	#DIV/0!	#DIV/0!	NA	NA	NA
ap	chr2R	12.6984	19.8719	19.2867	95.972	75.6883	91.4993	13.0687	8.08707	10.3331	4.60552	2.87986	2.12305	17.2857	87.7199	10.4963	3.20281	3.98344	10.6569	2.49481	1.27235	0.719701	3.06303	-1.71247	0.183698	3.07933e-17	0.053255
AP-1-2beta	chrX	5889.76	5573.68	5908.16	5748.72	5778.21	6390.88	5775.17	5829.76	6527.68	5957.24	5626.29	6289.55	5790.53	5972.6	6044.2	5957.69	188.028	362.536	419.591	331.628	-0.061856	-0.0171921	-0.0207981	0.53838	0.91715	0.872627
AP-1gamma	chrX	3918.04	3718.43	4413.44	4786.87	4860.98	5473.87	4912.63	5945	5948.09	4863.43	4906.33	4907.44	4016.64	5040.58	5601.91	4892.4	357.839	377.071	596.931	25.0944	-0.47993	-0.15233	-0.195376	3.36691e-06	0.267028	0.0972678
AP-1mu	chr3R	4706.5	5050.65	4519.52	4301.68	4317.22	4472.41	3836.25	4345.79	4334.25	4901.81	5024.4	4873.47	4758.89	4363.77	4172.1	4933.23	269.414	94.4031	290.908	80.2206	0.189852	0.0648029	0.241759	0.0175624	0.58118	0.00253392
AP-1sigma	chr3R	3338.53	3305.89	3179.09	2883.43	2846.28	2621.31	2984.41	2891.13	2734.5	3067.28	3341.6	2843.83	3274.51	2783.67	2870.01	3084.24	84.2278	141.834	126.284	249.318	0.190219	-0.044069	0.103856	0.0318462	0.757583	0.311201
AP-2alpha	chr2L	5811.26	4984.67	6371.04	6783.09	6787.05	7816.66	7254.3	8129.52	7298.9	6275.02	6196.5	6233.29	5722.32	7128.93	7560.91	6234.94	697.449	595.59	492.94	39.2837	-0.401958	-0.0848732	-0.278184	0.000136438	0.597145	0.0135414
AP-2mu	chr3R	5225.98	5495.78	5004.9	4995.88	4825.13	4600.1	5664.68	5081.71	4975.84	4412.09	4162.36	4667.53	5242.22	4807.04	5240.74	4413.99	245.843	198.506	370.935	252.591	0.000406578	-0.124623	-0.247686	0.992286	0.255038	0.00474787
AP-2sigma	chr3R	2320.35	2452.99	2157.97	2027.14	1855.36	1884.28	2243.06	1989.42	2083.52	2114.7	2160.86	2325.81	2310.44	1922.26	2105.33	2200.45	147.761	91.9733	128.22	110.983	0.134116	-0.131243	0.0637532	0.161922	0.259215	0.587516
Apc	chr3R	2022.51	1592.93	2240.47	2596.58	2565.44	3210.52	2511.56	3078.14	2977.8	2240.59	2323.09	2526.43	1951.97	2790.84	2855.83	2363.37	329.482	363.784	302.34	147.12	-0.548979	-0.0332103	-0.273067	0.000142225	0.904311	0.0924715
APC10	chr2R	808.082	958.621	742.538	620.619	709.08	621.391	706.896	673.248	702.648	845.113	793.882	893.806	836.414	650.363	694.264	844.267	110.793	50.8516	18.324	49.9671	0.268732	-0.0942387	0.282214	0.0315241	0.617439	0.0312131
Apc2	chr3R	1946.32	1871.14	2222.26	2538.99	2868.19	2836.48	2270.39	3195.4	2719.47	3047.32	3244.65	2647.45	2013.24	2747.89	2728.42	2979.8	184.876	181.601	462.573	304.269	-0.438547	0.010257	0.127152	0.00151563	0.973702	0.464391
APC4	chrX	1305.63	1261.47	1381.14	1380.93	1485.88	1540.41	1361.52	1412.2	1383.69	1501.4	1616.56	1513.74	1316.08	1469.07	1385.8	1543.9	60.5167	81.0556	25.4088	63.2297	-0.0744762	0.0841825	0.155856	0.431891	0.474246	0.0891181
APC7	chrX	5553.83	6760.43	5691.72	3237.46	4018.45	3628.8	4653.64	5091.82	5213.5	9008.4	8586.79	8929.56	6001.99	3628.24	4986.32	8841.58	660.433	390.499	294.465	224.15	0.267467	-0.458706	0.82633	0.0162815	4.93675e-05	4.21431e-16
ApepP	chr2L	4496.4	5331.24	4663.09	4889.24	4876.92	4583.01	3880.21	4255.82	4388.73	5360.82	5291.27	5517.82	4830.24	4783.06	4174.92	5389.97	441.808	173.355	263.738	116.053	0.210348	0.196184	0.368529	0.0207728	0.060659	2.6819e-05
Apf	chr2L	329.005	368.028	312.873	301.779	294.786	280.531	325.529	222.394	267.72	309.337	233.269	325.889	336.635	292.365	271.881	289.498	28.3582	10.8288	51.693	49.3943	0.30821	0.104796	0.0905792	0.102669	0.710975	0.71276
aph-1	chr2L	1938.24	2119.94	1899.74	1810.67	1947.98	1706.31	1793.97	1915.62	1905.04	2208.35	2080.22	1998.86	1985.97	1821.65	1871.55	2095.81	117.603	121.207	67.3884	105.612	0.0856155	-0.038981	0.163276	0.398712	0.794851	0.096384
aPKC	chr2R	5917.47	6218.32	5700.29	6481.31	6434.5	6285.3	6748.19	7019.57	6819.82	6825.38	6858.87	6635.6	5945.36	6400.37	6862.53	6773.29	260.14	102.366	140.643	120.406	-0.206976	-0.100584	-0.018884	0.000481206	0.173317	0.836879
Apl	chr3L	1863.21	2034.09	2077.61	2473.95	2409.08	2296.53	1701.3	2096.57	2076.01	1027.8	1079.95	1101.86	1991.63	2393.19	1957.96	1069.87	113.33	89.7679	222.509	38.0478	0.0246007	0.289581	-0.871915	0.861384	0.0102495	6.41718e-20
Aplip1	chr3L	2.30881	3.17951	1.07148	1.06636	0.995899	4.02195	1.18806	4.04353	1.87874	3.07035	2.87986	0	2.1866	2.02807	2.37011	1.9834	1.05931	1.72711	1.4898	1.72032	-0.116266	-0.224849	-0.256977	0.956053	0.933458	0.920466
apn	chr3R	0	0	0	0	0.995899	1.00549	0	0	0.939369	0	0	0	0	0.667129	0.313123	0	0	0.57777	0.542345	0	#NUM!	1.09124	#NUM!	NA	NA	NA
apolpp	chr4	2271.86	2112.78	1891.17	1518.49	1790.63	2811.34	2290.58	1498.13	1218.36	661.66	552.934	856.652	2091.94	2040.15	1669.02	690.415	191.202	681.589	556.164	153.888	0.325835	0.289673	-1.27347	0.413137	0.570389	0.000502408
Apoltp	chr2L	116.595	131.155	91.0761	79.9767	115.524	165.905	159.2	98.0557	85.4826	57.569	49.9176	75.3684	112.942	120.469	114.246	60.9517	20.2875	43.1772	39.4356	13.0582	-0.0165662	0.0765138	-0.906408	0.987148	0.891039	0.0123601
app	chr3L	2253.39	1862.4	2466.55	2607.24	2668.01	2660.52	2201.48	2780.94	2602.05	2484.68	2277.01	2126.24	2194.11	2645.26	2528.16	2295.98	306.41	33.1368	296.715	179.971	-0.204447	0.0653224	-0.138978	0.131697	0.755158	0.370436
APP-BP1	chr3L	1872.44	2085.76	1877.24	1895.98	1903.16	1719.38	1725.06	1896.42	2036.55	2064.04	2168.54	2017.96	1945.15	1839.51	1886.01	2083.51	121.797	104.094	156.004	77.1526	0.0445395	-0.0360176	0.14368	0.708811	0.822305	0.192178
Appl	chrX	102.742	94.5903	95.362	60.7823	96.6022	66.3622	46.3344	36.3918	27.2417	122.814	128.634	121.014	97.5647	74.5822	36.656	124.154	4.50007	19.2729	9.54908	3.98274	1.41231	1.02478	1.76001	1.51783e-07	0.000764747	6.54049e-12
Aprt	chr3L	669.553	646.235	671.82	718.724	699.121	699.819	730.658	610.573	723.314	734.58	671.968	729.269	662.536	705.888	688.182	711.939	14.1627	11.1216	67.311	34.7177	-0.0547907	0.0366497	0.0489641	0.672418	0.840615	0.732722
Aps	chr3L	16970.9	15903.1	15994	16297.1	16488.1	15119.5	16417.8	16739.2	15047.8	17821.8	17396.3	15819.9	16289.3	15968.2	16068.3	17012.7	591.978	741.202	898.276	1054.64	0.0197136	-0.00900822	0.0823968	0.85408	0.956063	0.400534
apt	chr2R	4879.66	3890.13	5073.47	5514.13	6015.23	5864	4846.1	6556.59	5937.75	6183.68	5847.08	5135.67	4614.42	5797.79	5780.15	5722.14	634.697	257.031	866.066	535.06	-0.324957	0.00439578	-0.014551	0.021897	0.991148	0.948099
AQP	chr2R	2.30881	2.38463	1.07148	0	1.9918	1.00549	2.37612	10.1088	3.75748	1.53517	4.79977	1.06153	1.92164	0.999095	5.41414	2.46549	0.737233	0.995915	4.12397	2.03537	-1.4944	-2.43804	-1.13486	0.210493	0.141128	0.347017
aqrs	chr3R	0	0	0	0	0	0	0	0	0	0	0	0	0	0	0	0	0	0	0	0	#DIV/0!	#DIV/0!	#DIV/0!	NA	NA	NA
aqz	chr3R	14050.2	11689.5	16189	20643.6	22103	20940.3	19060.1	24370.4	19214.8	20149.9	20128.3	17770	13976.2	21228.9	20881.7	19349.4	2250.7	771.338	3022.23	1367.88	-0.579266	0.0237906	-0.109954	1.23753e-05	0.931185	0.528476
ara	chr3L	0	0	0	0	0	0	0	0	0	0	0	0	0	0	0	0	0	0	0	0	#DIV/0!	#DIV/0!	#DIV/0!	NA	NA	NA
aralar1	chr3R	4130.45	4230.33	4388.79	4066.01	3775.45	4268.29	3302.81	3755.43	3738.69	5029.99	4659.62	4204.71	4249.86	4036.59	3598.98	4631.44	130.273	247.734	256.625	413.364	0.239829	0.165549	0.363874	0.0147721	0.166372	0.000149348
Arc1	chr2R	4804.62	5045.88	5595.28	1692.31	1214	1475.05	8600.38	7012.5	8609.32	1241.19	858.199	1374.68	5148.6	1460.45	8074.06	1158.02	405.215	239.487	919.355	268.095	-0.649116	-2.46688	-2.80163	0.000140505	7.96618e-54	4.20845e-70
Arc2	chr2R	274.748	280.592	229.297	184.48	230.053	178.977	354.042	264.851	316.567	194.199	189.111	170.906	261.546	197.836	311.82	184.739	28.0802	28.0355	44.7845	12.2468	-0.253653	-0.656408	-0.755229	0.182731	0.000412144	1.36675e-05
Arc42	chr3R	2681.68	3119.1	2525.49	2631.77	2751.67	2382	2347.61	2254.27	2358.76	2788.64	2812.67	2842.77	2775.42	2588.48	2320.21	2814.69	307.708	188.598	57.3788	27.1204	0.25845	0.157848	0.278721	0.00932506	0.203809	0.00633733
Archease	chr3R	1043.58	1021.42	1017.91	910.668	1001.87	887.845	942.133	1002.8	909.309	850.486	897.557	781.284	1027.64	933.463	951.413	843.109	13.9195	60.3355	47.4292	58.4867	0.111185	-0.0274791	-0.174352	0.302336	0.879392	0.108114
Arf102F	chr4	5737.38	7557.69	5974.59	4943.63	4975.51	4276.34	7943.38	4613.67	5502.83	5200.4	5156.87	5679.17	6423.22	4731.83	6019.96	5345.48	989.612	394.786	1724.04	289.801	0.0935433	-0.347357	-0.171434	0.673679	0.110404	0.446527
Arf51F	chr2R	5798.56	5842.34	5604.93	5458.68	5449.56	4674.51	5555.37	5330.39	5129.9	5287.9	4859.29	4988.12	5748.61	5194.25	5338.55	5045.1	126.345	450.13	212.857	219.917	0.106765	-0.0395335	-0.081565	0.248824	0.779166	0.43794
Arf79F	chr3L	22692.1	22751.8	21715.7	21341	19759.6	18747.3	19251.3	18212.1	17512.7	20122.3	18653.8	19360.1	22386.5	19949.3	18325.4	19378.7	581.683	1307.2	874.86	734.402	0.28879	0.122497	0.0806339	8.75519e-05	0.19194	0.378539
ArfGAP1	chr3L	4109.67	4018.1	4007.35	4042.56	3738.61	3970.67	3991.89	3796.88	3795.05	3938.49	3954.05	4041.23	4045.04	3917.28	3861.27	3977.92	56.231	158.853	113.119	55.377	0.0670782	0.020775	0.0429396	0.338823	0.850016	0.59965
ArfGAP3	chr3L	3569.41	3569	3835.91	3831.42	3771.47	4113.45	3963.37	3784.75	3775.33	3596.91	3645.91	3926.59	3658.11	3905.45	3841.15	3723.14	153.982	182.613	105.954	177.89	-0.0704405	0.0239494	-0.0450196	0.410926	0.854993	0.651253
Arfip	chr3R	1381.82	1228.08	1505.43	1653.92	1687.05	1744.52	1302.12	1368.74	1218.36	1698.67	1784.56	1705.87	1371.78	1695.16	1296.4	1729.7	138.947	45.8425	75.3495	47.6428	0.0815328	0.386909	0.416006	0.486487	0.000125649	1.24697e-05
Arfrp1	chrX	885.427	904.57	802.541	824.293	923.199	868.741	930.252	901.708	830.402	1025.5	965.714	867.268	864.179	872.078	887.454	952.826	54.2317	49.5371	51.4282	79.8976	-0.038342	-0.025216	0.10254	0.794753	0.908865	0.423042
arg	chrX	34.6321	42.9233	21.4297	22.3935	18.9221	25.1372	35.6418	22.2394	32.8779	6.90828	13.4394	10.6153	32.995	22.1509	30.2531	10.321	10.84	3.11464	7.07627	3.27547	0.125167	-0.449715	-1.5515	0.788927	0.478618	0.00251048
Argk	chr3L	8369.42	7668.97	9061.53	2042.07	2299.53	2100.46	1938.92	1701.32	1970.8	11087	11843	13647	8366.64	2147.36	1870.34	12192.3	696.285	134.983	147.247	1315.26	2.16135	0.199258	2.7046	1.80988e-102	0.154674	1.25884e-161
Argl	chr2L	121.212	129.565	92.1475	93.8393	80.6678	97.5323	67.7195	43.468	60.1196	69.0828	49.9176	88.1067	114.308	90.6798	57.1024	69.0357	19.6409	8.86505	12.4041	19.0946	1.00131	0.667231	0.273792	0.000331785	0.0470126	0.468482
ArgRS	chrX	4197.41	4142.9	4322.36	4094.81	3980.61	4165.73	3825.56	4019.27	4139.8	4412.86	4243.96	5004.04	4220.89	4080.38	3994.88	4553.62	92.0078	93.4013	158.536	399.113	0.0793962	0.0305537	0.188862	0.399248	0.832776	0.0307596
ArgRS-m	chr3R	969.698	1043.67	1015.77	1063.16	1103.46	1030.62	860.156	954.274	914.946	1160.59	1186.5	1084.88	1009.71	1065.75	909.792	1143.99	37.3573	36.4849	47.2699	52.8059	0.150336	0.228255	0.330468	0.110563	0.0232752	0.000162832
ari-1	chrX	3522.08	3360.74	3510.18	3550.97	3898.95	3727.34	4063.17	4610.64	4246.89	3338.23	3070.89	3018.98	3464.33	3725.75	4306.9	3142.7	89.9123	173.996	278.624	171.312	-0.314072	-0.209118	-0.454643	8.29211e-05	0.0230923	6.05305e-09
ari-2	chr2R	1931.32	1875.91	2095.82	2239.35	2676.98	2414.17	2071.98	2949.76	2592.66	2891.5	2996.98	2454.25	1967.68	2443.5	2538.13	2780.91	114.377	220.284	441.422	287.769	-0.36727	-0.054818	0.131789	0.00969705	0.819738	0.451345
Arl1	chr3L	2351.52	2512.61	2126.89	1608.06	1646.22	1631.91	2226.43	1759.95	2027.16	1912.06	1917.99	1920.3	2330.34	1628.73	2004.51	1916.78	193.726	19.2755	234.063	4.25221	0.21729	-0.299502	-0.0645634	0.0423744	0.00995417	0.649409
Arl2	chr3R	788.457	887.083	698.607	504.386	564.675	487.661	756.795	518.583	655.68	630.189	679.648	701.669	791.382	518.907	643.686	670.502	94.2718	40.5083	119.558	36.6075	0.298018	-0.31088	0.0588843	0.0611781	0.0975877	0.792331
Arl4	chr4	3279.66	3483.95	3182.3	2738.4	2289.57	2073.31	3693.68	2439.26	2529.72	2398.71	2684.99	2527.5	3315.3	2367.1	2887.56	2537.07	153.947	339.253	699.59	143.382	0.199292	-0.28673	-0.186688	0.262058	0.148892	0.338711
Arl5	chr3L	2714	2534.86	2675.49	2662.69	2752.67	2354.85	2383.25	2480.71	2256.36	2675.04	2747.39	2448.94	2641.45	2590.07	2373.44	2623.79	94.2959	208.613	112.492	155.684	0.154351	0.12601	0.144672	0.112075	0.288254	0.16094
Arl6	chr2R	3.46321	3.17951	2.14297	4.26542	0.995899	8.0439	5.94031	0	2.81811	3.83793	2.87986	3.18458	2.92856	4.43507	2.91947	3.30079	0.694975	3.52706	2.97145	0.489493	0.00448451	0.603251	0.177105	0.984611	0.731119	0.919434
Arl6IP1	chr3R	4342.86	4770.06	4215.21	4394.45	4049.33	3645.9	4884.12	4683.42	4626.39	4366.03	4588.58	4184.54	4442.71	4029.89	4731.31	4379.72	290.585	374.656	135.373	202.368	-0.0908	-0.231499	-0.111402	0.394175	0.0276708	0.314962
Arl8	chr3R	2591.63	2863.94	2584.42	2074.06	2050.56	1889.31	2575.72	2230.01	2234.76	2035.64	2021.66	2023.27	2680	2004.64	2346.83	2026.86	159.341	100.57	198.238	7.6475	0.191519	-0.227367	-0.211467	0.037386	0.0276642	0.0288838
arm	chrX	14366.5	15021.6	14301.1	13820	15072.9	15444.3	12785.9	14297.9	14424	15704.8	15587.7	15812.5	14563.1	14779.1	13836	15701.7	398.431	851.098	911.543	112.417	0.0738923	0.0951327	0.182498	0.392143	0.344918	0.0224162
armi	chr3L	5604.62	4281.21	5615.64	7459.16	6336.91	7936.31	6565.23	7525.01	6743.73	4996.22	5497.66	5972.15	5167.16	7244.13	6944.66	5488.68	767.276	821.099	510.467	488.027	-0.426533	0.060908	-0.339445	0.00144312	0.787134	0.0165365
Arp1	chr3R	6014.44	6776.33	5652.07	5099.31	4816.17	4891.7	5097.97	4559.08	5132.71	5173.53	4719.14	5264.11	6147.61	4935.73	4929.92	5052.26	573.835	146.618	321.626	292.028	0.318461	0.0016973	0.035364	0.000651741	0.994241	0.800203
Arp10	chrX	1222.51	1397.39	1145.42	1033.3	988.928	1125.14	1097.77	885.534	1254.06	1202.81	1141.39	1286.57	1255.11	1049.12	1079.12	1210.25	129.113	69.4711	184.969	72.8784	0.217955	-0.0406725	0.165455	0.145405	0.872754	0.326468
Arp2	chrX	6602.03	5497.37	6586.41	6879.06	6958.35	7737.22	6035.35	6439.33	6108.72	5954.94	5490.94	5635.65	6228.6	7191.54	6194.47	5693.84	633.314	474.232	215.205	237.41	0.00792843	0.215322	-0.121578	0.95595	0.0521846	0.283803
Arp3	chr3L	5282.55	5122.19	5152.76	5177.16	4822.14	4874.6	5245.29	4598.51	4701.54	4836.56	4903.45	5164.33	5185.83	4957.97	4848.45	4968.11	85.141	191.628	347.516	173.187	0.0970526	0.0322262	0.0351752	0.243627	0.800863	0.741664
Arp5	chr3R	967.389	961.801	975.05	905.336	930.17	936.109	907.679	987.633	951.581	1031.64	954.195	1065.77	968.08	923.872	948.964	1017.2	6.65126	16.3245	40.0412	57.1727	0.0287725	-0.0386615	0.10018	0.804968	0.784145	0.333863
Arp53D	chr2R	0	0.794877	0	0	0	0	0	1.01088	0	0.767587	0	0	0.264959	0	0.336961	0.255862	0.458922	0	0.583634	0.443166	-0.346813	#NUM!	-0.397215	NA	NA	NA
Arp6	chrX	1690.05	1661.29	1569.72	1546.22	1476.92	1509.24	1342.51	1588.1	1618.53	1697.9	1685.68	1718.61	1640.35	1510.79	1516.38	1700.73	62.8348	34.6749	151.344	16.6475	0.113375	-0.0053279	0.165524	0.268355	0.971364	0.104814
Arp8	chrX	1687.74	1922.01	1565.44	1482.23	1544.64	1538.4	2066.04	1848.91	2021.52	1628.82	1702.96	1672.97	1725.06	1521.76	1978.82	1668.25	181.194	34.3691	114.692	37.2946	-0.197994	-0.378904	-0.246308	0.0505096	0.000171821	0.0147546
Arpc1	chr2L	3412.41	3408.43	3338.74	3263.05	3180.9	3335.2	3300.43	3177.21	3446.55	3487.15	3156.33	3389.46	3386.53	3259.72	3308.06	3344.31	41.4333	77.2035	134.832	169.966	0.0338211	-0.0212394	0.0157225	0.700307	0.866333	0.885018
Arpc2	chr2L	20121.2	19962.5	18468.1	18210.2	18145.3	16331.1	17777	17256.8	16863.6	17887.1	17708.3	16815.6	19517.3	17562.2	17299.1	17470.3	912.094	1066.63	458.17	573.977	0.174055	0.0217756	0.0142099	0.019704	0.869479	0.902427
Arpc3A	chr3R	2143.73	2424.37	2096.89	1772.28	1776.68	1928.52	1670.41	1765	1903.16	2270.52	1986.15	2150.65	2221.66	1825.83	1779.53	2135.77	177.107	88.9627	117.052	142.771	0.320148	0.0370599	0.263265	0.00110929	0.835219	0.0109528
Arpc3B	chrX	30.0145	34.9746	34.2875	14.929	16.9303	25.1372	70.0956	39.4244	43.211	29.1683	24.9588	32.9073	33.0922	18.9988	50.9103	29.0115	2.68742	5.40934	16.7224	3.97658	-0.621469	-1.42205	-0.811335	0.118275	0.0008089	0.0439768
Arpc4	chr2L	2284.56	2524.53	1977.96	1672.05	1627.3	1703.3	2207.42	1842.84	2288.3	1979.61	1727.92	2066.79	2262.35	1667.55	2112.85	1924.77	273.962	38.1973	237.31	175.966	0.098629	-0.341466	-0.134505	0.497348	0.0147146	0.376896
Arpc5	chr2L	1603.47	1631.09	1509.72	1214.58	1263.8	1296.07	1317.56	1380.87	1346.12	1482.21	1470.65	1422.45	1581.42	1258.15	1348.18	1458.44	63.6151	41.0392	31.7037	31.6989	0.23021	-0.0997107	0.113407	0.00220489	0.324653	0.191173
arr	chr2R	457.143	349.746	465.024	547.041	531.81	740.039	523.935	503.42	566.44	446.735	428.14	503.164	423.971	606.296	531.265	459.346	64.4015	116.074	32.1429	39.0696	-0.325466	0.190592	-0.209849	0.0626705	0.407611	0.291689
Arr1	chr2L	0	0	0	0	0	0	0	0	0	0	0	0	0	0	0	0	0	0	0	0	#DIV/0!	#DIV/0!	#DIV/0!	NA	NA	NA
Arr2	chr3L	0	0	0	0	0	0	1.18806	3.03265	0	0	0	0	0	0	1.4069	0	0	0	1.52812	0	#NUM!	#NUM!	#NUM!	NA	NA	NA
Ars2	chr2R	5432.62	4548.29	5592.07	6595.41	6733.27	6662.36	5429.44	6699.12	5936.81	6014.04	6063.07	5991.26	5190.99	6663.68	6021.79	6022.79	562.281	68.9412	639.093	36.6974	-0.214183	0.146126	0.000239052	0.0467345	0.27919	1
Art1	chr3R	11546.3	11329.4	10677.3	10048.3	9630.35	10153.4	8676.41	10142.2	10538.8	10419.2	10630.5	9737.39	11184.3	9944.01	9785.8	10262.4	452.292	276.681	981.005	466.773	0.19272	0.0231385	0.0686044	0.0366763	0.891373	0.552281
Art2	chr2L	0	0.794877	2.14297	1.06636	0	0	0	1.01088	0	0.767587	0	0	0.979281	0.355452	0.336961	0.255862	1.08332	0.615661	0.583634	0.443166	1.53914	0.0770726	-0.397215	NA	NA	NA
Art3	chr3R	3016.45	2941.84	3113.73	2487.81	2408.08	2733.92	2169.4	2068.27	2095.73	2856.96	3041.14	2811.98	3024.01	2543.27	2111.13	2903.36	86.1939	169.851	52.2957	121.418	0.518444	0.268667	0.459705	2.45826e-12	0.00137002	6.54353e-10
Art4	chr3R	7054.55	6867.74	7634.32	7375.98	8227.12	7124.88	5874.96	7481.55	6600.01	8820.34	8424.56	7132.4	7185.54	7576	6652.17	8125.77	399.723	577.7	804.561	882.747	0.11127	0.18761	0.288678	0.418619	0.21179	0.0222884
Art6	chr3R	0	0	0	0	0.995899	0	0	0	0	0	0	0	0	0.331966	0	0	0	0.574983	0	0	#DIV/0!	#DIV/0!	#DIV/0!	NA	NA	NA
Art7	chr2R	1083.98	1031.75	1078.98	921.331	936.145	1089.95	1011.04	1079.62	1092.49	1257.31	1228.74	1236.68	1064.91	982.475	1061.05	1240.91	28.8223	93.3688	43.7847	14.745	0.00523334	-0.111	0.225905	0.979751	0.385091	0.0223663
Art8	chr2L	843.868	781.364	785.397	719.79	620.445	693.786	804.317	658.085	712.981	733.045	783.323	813.13	803.543	678.007	725.128	776.499	34.9808	51.5179	73.8691	40.4759	0.14814	-0.0969349	0.0987489	0.230505	0.569564	0.485846
Art9	chr3R	0	0	0	0	0	0	0	0	0	0	0	0	0	0	0	0	0	0	0	0	#DIV/0!	#DIV/0!	#DIV/0!	NA	NA	NA
Arts	chr3L	5660.04	5839.96	6169.6	5697.54	6142.71	6385.85	4515.82	5429.45	5623.06	7295.14	7654.68	7305.43	5889.87	6075.37	5189.45	7418.42	258.422	349.061	591.354	204.672	0.182654	0.22739	0.51553	0.0761153	0.0446034	3.94266e-08
aru	chr2L	868.111	730.492	833.614	913.867	825.6	993.421	807.882	914.849	1015.46	776.798	707.486	869.391	810.739	910.963	912.73	784.558	71.6044	83.9482	103.804	81.2306	-0.170951	-0.00279533	-0.218307	0.238765	0.990767	0.146933
Arv1	chr3L	926.985	1033.34	864.687	955.455	1000.88	844.609	1123.91	1086.7	976.944	805.966	850.52	743.069	941.671	933.648	1062.52	799.851	85.2802	80.3847	76.4072	53.9856	-0.174191	-0.186535	-0.409681	0.174736	0.205151	0.000519034
arx	chr3L	1033.19	1073.88	930.047	960.787	964.03	841.593	1059.75	946.187	952.52	853.556	998.352	883.19	1012.37	922.137	986.153	911.7	74.1411	69.7718	63.8164	76.4923	0.0378568	-0.0968304	-0.113252	0.780747	0.562202	0.414694
ARY	chrY	0	0	0	0	0	0	0	0	0	0	0	0	0	0	0	0	0	0	0	0	#DIV/0!	#DIV/0!	#DIV/0!	NA	NA	NA
Asap	chr2R	2690.91	2410.07	2915.51	3431.53	3848.15	4185.84	3570.12	4014.22	3749.02	3313.67	3164.01	3087.98	2672.16	3821.84	3777.79	3188.55	253.241	377.843	223.44	114.829	-0.499535	0.016727	-0.244639	9.90484e-07	0.936273	0.0301395
Asator	chr4	1259.45	1212.19	1212.92	1987.69	2112.3	1928.52	1448.25	1459.72	1417.51	1326.39	1297.86	1213.33	1228.19	2009.5	1441.82	1279.19	27.0803	93.8113	21.8244	58.7982	-0.231365	0.478945	-0.172663	0.00345209	1.65724e-10	0.0434388
Asciz	chr3L	604.907	569.927	581.815	581.164	596.544	480.623	446.711	528.692	496.926	740.721	778.523	665.577	585.55	552.777	490.776	728.274	17.7866	62.9585	41.335	57.4924	0.254726	0.171631	0.569415	0.057638	0.313613	3.51768e-06
ase	chrX	0	0	0	0	0	2.01097	0	1.01088	0	0	0	0	0	0.670325	0.336961	0	0	1.16104	0.583634	0	#NUM!	0.992278	#NUM!	NA	NA	NA
asf1	chr3L	6021.36	7428.92	5752.79	5025.74	4809.2	4124.51	6072.18	4962.43	5171.23	5390.76	5943.08	5416.97	6401.03	4653.15	5401.94	5583.6	900.254	470.442	589.756	311.589	0.244824	-0.215272	0.0477175	0.0695038	0.179644	0.801276
ash1	chr3L	2303.03	1722.5	2450.48	3270.51	3953.72	4032	2600.67	3687.7	3040.74	3223.1	2828.99	2624.09	2158.67	3752.08	3109.7	2892.06	384.864	418.881	546.79	304.441	-0.526633	0.270914	-0.10468	0.00158882	0.194625	0.642403
ash2	chr3R	1378.36	1583.39	1451.86	1541.95	1484.89	1527.34	1343.7	1497.12	1522.72	1669.5	1807.59	1754.7	1471.2	1518.06	1454.51	1743.93	103.879	29.6422	96.8173	69.6738	0.0164628	0.0616919	0.26181	0.889898	0.669172	0.00501324
Ask1	chr3R	3331.61	3436.25	3531.61	3892.2	4030.4	4083.28	3662.79	4503.48	4178.31	3864.03	4048.13	3993.46	3433.16	4001.96	4114.86	3968.54	100.037	98.6663	423.922	94.545	-0.26131	-0.0401372	-0.0522361	0.00273325	0.779565	0.652118
asl	chr3R	2441.56	2453.78	2466.55	2848.24	2987.7	2765.09	2218.11	3253.02	3104.62	3034.27	2928.82	2835.34	2453.97	2867.01	2858.58	2932.81	12.4973	112.485	559.607	99.5256	-0.220184	0.00424594	0.0369834	0.112075	0.992768	0.856298
AsnRS	chr2L	7923.82	7804.9	7901.12	8178.95	7135.62	8199.75	8438.8	7704.95	8987.89	7395.7	7677.71	8467.8	7876.61	7838.11	8377.21	7847.07	63.1355	608.461	643.68	555.754	-0.0888953	-0.0959652	-0.094316	0.408039	0.467692	0.412546
AsnRS-m	chr2R	347.475	292.515	397.52	407.348	356.532	399.178	332.657	256.764	329.719	366.139	406.061	389.58	345.837	387.686	306.38	387.26	52.5219	27.2878	42.9936	20.0618	0.174769	0.339567	0.33798	0.348619	0.0716761	0.0515164
AsnS	chr3L	3173.45	3250.25	3504.82	3296.11	2758.64	2865.64	3836.25	3443.07	3408.97	4209.44	4944.72	4672.84	3309.51	2973.46	3562.76	4609	173.45	284.494	237.459	371.773	-0.10638	-0.260853	0.371458	0.370918	0.0275724	0.000340121
asp	chr3R	8046.19	7313.66	8647.94	9769.95	11390.1	10619	7617.85	10956	10124.5	11837.7	11618.3	10332.9	8002.6	10593	9566.11	11263	668.206	810.385	1737.7	812.909	-0.257464	0.147107	0.235585	0.0739566	0.442777	0.126319
Asph	chr2R	625.686	591.388	529.313	338.035	449.151	289.58	494.233	587.323	524.168	383.793	418.54	445.841	582.129	358.922	535.242	416.058	48.8494	81.8099	47.5225	31.0984	0.121149	-0.57652	-0.363405	0.537627	0.00131722	0.0415759
ASPP	chr2R	357.865	267.873	388.948	375.357	401.347	424.316	251.869	301.243	298.719	386.096	330.224	354.55	338.229	400.34	283.944	356.957	62.8805	24.4947	27.8063	28.0135	0.252394	0.49562	0.330144	0.179961	0.00677136	0.0711281
AspRS	chr2R	6720.93	6628.48	6905.71	6541.03	6476.33	7042.43	6888.38	7480.54	7383.44	7316.64	7831.31	7376.55	6751.71	6686.6	7250.79	7508.16	141.154	309.856	317.586	281.449	-0.102885	-0.116865	0.0503229	0.168946	0.172506	0.579767
AspRS-m	chr2L	3684.85	3027.69	4005.2	4886.04	4724.55	5183.29	4151.09	5089.8	4651.76	4333.03	4280.44	4440.37	3572.58	4931.29	4630.88	4351.28	498.336	232.694	469.704	81.5125	-0.37432	0.0906793	-0.0898476	0.00129157	0.606834	0.550432
asrij	chr2R	1700.43	1922.01	1760.45	1482.23	1488.87	1458.96	1789.22	1461.74	1721.86	1320.25	1291.14	1357.69	1794.3	1476.69	1657.61	1323.03	114.602	15.7061	172.939	33.3641	0.114317	-0.166736	-0.32526	0.287329	0.172922	0.00113891
asRNA:ASTR	chr3R	10.3896	18.2822	22.5011	28.7916	29.877	59.3237	40.3941	46.5006	51.6653	29.1683	36.4783	28.6612	17.0576	39.3308	46.1867	31.4359	6.14791	17.3229	5.64217	4.37414	-1.43706	-0.231818	-0.555062	0.0010313	0.705271	0.228529
asRNA:CR11538	chr3L	1.1544	3.97438	5.35742	1.06636	0	7.03841	8.31643	0	2.81811	2.30276	0.959954	0	3.4954	2.70159	3.71151	1.08757	2.14205	3.79345	4.22958	1.15667	-0.0865492	-0.458199	-1.7709	0.979912	0.870072	0.503071
asRNA:CR17025	chr3R	0	0	0	0	0	0	0	0	0	0	0	0	0	0	0	0	0	0	0	0	#DIV/0!	#DIV/0!	#DIV/0!	NA	NA	NA
asRNA:CR30267	chr2R	0	0	0	0	0	0	0	0	0	0	0	0	0	0	0	0	0	0	0	0	#DIV/0!	#DIV/0!	#DIV/0!	NA	NA	NA
asRNA:CR31144	chr3R	8.08082	10.3334	23.5726	24.5262	24.8975	84.4609	172.269	88.9577	67.6346	26.8655	26.8787	24.4151	13.9956	44.6282	109.62	26.0531	8.37006	34.4967	55.2928	1.41857	-2.96947	-1.29649	-2.07299	8.11901e-08	0.0181246	6.14357e-05
asRNA:CR31429	chr3R	0	0	4.28593	3.19907	1.9918	13.0713	10.6926	8.08707	10.3331	3.83793	4.79977	8.49222	1.42864	6.0874	9.70423	5.70997	2.47448	6.07831	1.41199	2.45702	-2.76397	-0.672787	-0.765129	0.0406774	0.59599	0.474385
asRNA:CR31514	chr3R	1.1544	0	0	3.19907	0.995899	2.01097	1.18806	1.01088	2.81811	0	1.91991	1.06153	0.384801	2.06865	1.67235	0.993812	0.666495	1.10272	0.996201	0.961744	-2.11969	0.30681	-0.750833	0.45354	NA	0.743814
asRNA:CR31845	chr2L	0	0	0	2.13271	1.9918	1.00549	0	0	0	0	0	0	0	1.71	0	0	0	0.61418	0	0	#DIV/0!	#DIV/0!	#DIV/0!	NA	NA	NA
asRNA:CR31912	chr2L	1.1544	0	1.07148	3.19907	0.995899	14.0768	11.8806	10.1088	9.39369	2.30276	3.83982	4.24611	0.741962	6.0906	10.461	3.46289	0.643894	7.00345	1.28033	1.02504	-3.81754	-0.780372	-1.59498	0.00700629	0.475418	0.110694
asRNA:CR32224	chr3L	0	0	0	0	0	0	0	0	0	0	0	0	0	0	0	0	0	0	0	0	#DIV/0!	#DIV/0!	#DIV/0!	NA	NA	NA
asRNA:CR32252	chr3L	1.1544	0.794877	1.07148	2.13271	1.9918	0	4.75224	4.04353	7.51495	9.97863	2.87986	5.30763	1.00692	1.37484	5.43691	6.05537	0.188258	1.19273	1.83419	3.60797	-2.43284	-1.98353	0.155429	0.0996925	0.213342	0.869244
asRNA:CR33945	chr3R	0	0	1.07148	0	2.9877	1.00549	1.18806	0	0	0	0.959954	0	0.357161	1.33106	0.39602	0.319985	0.618621	1.52022	0.685927	0.55423	-0.149	1.74893	-0.307572	NA	NA	NA
asRNA:CR42254	chr2R	300.145	352.925	296.801	282.584	303.749	192.048	401.565	250.699	258.327	334.668	311.985	334.381	316.624	259.461	303.53	327.011	31.4826	59.3323	84.9861	13.0138	0.0609292	-0.226324	0.107501	0.816699	0.481243	0.718312
asRNA:CR42547	chr2R	54.2569	42.1285	35.3589	51.1851	43.8196	42.2305	48.7105	27.2938	33.8173	44.52	36.4783	50.9533	43.9148	45.745	36.6072	43.9839	9.57479	4.77775	10.9775	7.25239	0.262578	0.321487	0.264846	0.513837	0.505075	0.538922
asRNA:CR42738	chr3R	0	0	0	0	0	0	0	0	0	0	0	0	0	0	0	0	0	0	0	0	#DIV/0!	#DIV/0!	#DIV/0!	NA	NA	NA
asRNA:CR42742	chr2R	0	0	0	0	0	0	0	0	0	0	0	0	0	0	0	0	0	0	0	0	#DIV/0!	#DIV/0!	#DIV/0!	NA	NA	NA
asRNA:CR42743	chr2L	0	0	0	0	0	0	0	0	0.939369	0	0.959954	0	0	0	0.313123	0.319985	0	0	0.542345	0.55423	#NUM!	#NUM!	0.0312733	NA	NA	NA
asRNA:CR42860	chr3L	1.1544	1.58975	2.14297	3.19907	1.9918	2.01097	3.56418	7.07618	3.75748	0	0.959954	3.18458	1.62904	2.40061	4.79928	1.38151	0.495451	0.691548	1.97422	1.63361	-1.5588	-0.999415	-1.79657	0.208993	0.475186	0.177992
asRNA:CR42871	chr3L	64.6465	62.7953	48.2167	79.9767	65.7293	66.3622	60.5911	29.3156	40.3929	73.6883	108.475	75.3684	58.5529	70.6894	43.4332	85.8439	8.99907	8.04925	15.8579	19.617	0.430941	0.702695	0.982916	0.227424	0.0631996	0.00226308
asRNA:CR43152	chrX	8.08082	2.38463	5.35742	5.33178	1.9918	4.02195	9.50449	9.09795	4.69685	0	4.79977	3.18458	5.27429	3.78184	7.76643	2.66145	2.849	1.68289	2.6661	2.44227	-0.558275	-1.03816	-1.54504	0.566422	0.423315	0.188209
asRNA:CR43159	chr3L	2.30881	0.794877	3.21445	4.26542	0.995899	4.02195	14.2567	4.04353	6.57558	3.07035	2.87986	2.12305	2.10604	3.09442	8.29195	2.69109	1.22246	1.82145	5.31853	0.501067	-1.97718	-1.42204	-1.62352	0.0540307	0.201838	0.11857
asRNA:CR43160	chr2R	0	0	0	0	0	0	0	0	0	0	0	0	0	0	0	0	0	0	0	0	#DIV/0!	#DIV/0!	#DIV/0!	NA	NA	NA
asRNA:CR43243	chr2R	0	0	0	0	0	0	0	0	0	0	0	0	0	0	0	0	0	0	0	0	#DIV/0!	#DIV/0!	#DIV/0!	NA	NA	NA
asRNA:CR43257	chr2R	182.396	173.283	193.938	158.887	187.229	136.746	150.884	127.371	165.329	164.264	146.873	136.937	183.206	160.954	147.861	149.358	10.3514	25.3048	19.1585	13.8317	0.30922	0.122404	0.0145279	0.132773	0.68896	0.955291
asRNA:CR43259	chr3R	0	0	0	0	0	0	0	0	0	0	0	0	0	0	0	0	0	0	0	0	#DIV/0!	#DIV/0!	#DIV/0!	NA	NA	NA
asRNA:CR43299	chrX	0	0	0	0	0	1.00549	0	0	0	0	0	0	0	0.335162	0	0	0	0.580518	0	0	#DIV/0!	#DIV/0!	#DIV/0!	NA	NA	NA
asRNA:CR43413	chr2L	0	0	0	0	0	0	0	0	0	0	0	0	0	0	0	0	0	0	0	0	#DIV/0!	#DIV/0!	#DIV/0!	NA	NA	NA
asRNA:CR43425	chr4	1.1544	0	1.07148	2.13271	3.9836	5.02744	3.56418	2.02177	0.939369	3.07035	5.75973	3.18458	0.741962	3.71458	2.17511	4.00488	0.643894	1.46599	1.31911	1.52081	-1.55167	0.772114	0.880675	0.542444	0.647333	0.517608
asRNA:CR43426	chr3L	8.08082	11.9232	13.9293	12.7963	12.9467	4.02195	9.50449	12.1306	13.1512	18.4221	16.3192	15.9229	11.3111	9.92164	11.5954	16.8881	2.97188	5.10983	1.88132	1.34319	-0.0358179	-0.224905	0.542449	0.964977	0.831603	0.429729
asRNA:CR43429	chr2R	0	3.17951	5.35742	8.53085	8.96309	15.0823	26.1373	24.2612	21.6055	9.97863	15.3593	5.30763	2.84564	10.8587	24.0013	10.2152	2.69427	3.66409	2.27707	5.02999	-3.07629	-1.14426	-1.2324	2.86364e-05	0.0800313	0.041924
asRNA:CR43430	chr2R	1.1544	3.97438	6.4289	8.53085	5.9754	6.03292	13.0687	14.1524	15.0299	5.37311	2.87986	7.43069	3.85256	6.84639	14.0836	5.22789	2.63936	1.45907	0.982421	2.27889	-1.87013	-1.04061	-1.42972	0.0123109	0.183677	0.049054
asRNA:CR43433	chr3L	0	0	0	0	0	0	0	0	0	0	0	0	0	0	0	0	0	0	0	0	#DIV/0!	#DIV/0!	#DIV/0!	NA	NA	NA
asRNA:CR43454	chr3R	3.46321	0	4.28593	3.19907	0.995899	5.02744	1.18806	6.0653	2.81811	4.60552	0.959954	1.06153	2.58305	3.07413	3.35716	2.209	2.27449	2.01867	2.4829	2.07607	-0.378166	-0.127059	-0.603846	0.798218	0.954425	0.773932
asRNA:CR43460	chr3R	167.388	147.052	151.079	98.1047	117.516	75.4115	116.43	107.154	85.4826	77.5262	69.1167	64.7531	155.173	97.0108	103.022	70.4654	10.7685	21.0736	15.882	6.49247	0.590926	-0.0867363	-0.547967	0.00905626	0.845478	0.0376999
asRNA:CR43463	chr2L	380.953	365.643	455.38	254.859	165.319	286.564	262.562	159.72	204.782	191.129	135.354	233.536	400.659	235.581	209.021	186.673	48.0044	62.8793	51.5519	49.2426	0.938725	0.172572	-0.163137	0.00024499	0.676346	0.654766
asRNA:CR43464	chr2L	0	0	0	0	0	0	0	0	0	0	0	0	0	0	0	0	0	0	0	0	#DIV/0!	#DIV/0!	#DIV/0!	NA	NA	NA
asRNA:CR43465	chr2L	4.61761	3.17951	4.28593	6.39814	7.96719	6.03292	5.94031	4.04353	6.57558	3.83793	0.959954	4.24611	4.02768	6.79942	5.51981	3.01467	0.75303	1.02768	1.31736	1.7911	-0.454668	0.300793	-0.87262	0.672369	0.817378	0.477153
asRNA:CR43466	chr2R	1.1544	0	1.07148	0	1.9918	2.01097	0	1.01088	0.939369	1.53517	0.959954	2.12305	0.741962	1.33426	0.650084	1.53939	0.643894	1.15554	0.564124	0.581561	0.190719	1.03734	1.24366	NA	NA	0.652438
asRNA:CR43467	chr2R	0	0	0	3.19907	0	3.01646	1.18806	0	0	0.767587	0	0	0	2.07184	0.39602	0.255862	0	1.79659	0.685927	0.443166	#NUM!	2.38727	-0.630208	NA	NA	NA
asRNA:CR43468	chr2R	17.316	24.6412	30.0015	33.057	16.9303	27.1482	16.6329	15.1632	7.51495	27.6331	28.7986	27.5997	23.9862	25.7118	13.1037	28.0105	6.36805	8.15875	4.89545	0.682759	0.872235	0.972459	1.09599	0.099667	0.103292	0.0358352
asRNA:CR43469	chr2R	39.2497	32.59	36.4304	27.7253	42.8237	41.225	21.3851	25.2721	24.4236	35.309	26.8787	36.0919	36.09	37.258	23.6936	32.7599	3.34289	8.29418	2.04373	5.10825	0.607103	0.653052	0.467433	0.137755	0.15452	0.305243
asRNA:CR43470	chr3L	0	4.76926	2.14297	4.26542	2.9877	1.00549	1.18806	1.01088	4.69685	3.07035	4.79977	2.12305	2.30408	2.75287	2.2986	3.33106	2.38871	1.64261	2.07883	1.35727	0.00343466	0.260183	0.535227	0.983881	0.935801	0.782428
asRNA:CR43471	chr3R	0	1.58975	1.07148	1.06636	2.9877	1.00549	1.18806	0	0	0	0	2.12305	0.887079	1.68651	0.39602	0.707685	0.810761	1.12727	0.685927	1.22575	1.16349	2.0904	0.837532	NA	NA	NA
asRNA:CR43472	chr3R	0	0	1.07148	1.06636	0.995899	0	2.37612	0	1.87874	0	0	0	0.357161	0.687418	1.41829	0	0.618621	0.596363	1.2532	0	-1.9895	-1.04489	#NUM!	NA	NA	NA
asRNA:CR43474	chr3R	0	0	3.21445	1.06636	0	2.01097	0	0	0	1.53517	0	0	1.07148	1.02578	0	0.511724	1.85586	1.0061	0	0.886333	#DIV/0!	#DIV/0!	#DIV/0!	NA	NA	NA
asRNA:CR43476	chr3R	0	0	0	0	0	0	0	0	0	0	0	0	0	0	0	0	0	0	0	0	#DIV/0!	#DIV/0!	#DIV/0!	NA	NA	NA
asRNA:CR43477	chr3R	0	0	0	0	0	0	0	0	0	0	0	0	0	0	0	0	0	0	0	0	#DIV/0!	#DIV/0!	#DIV/0!	NA	NA	NA
asRNA:CR43478	chr3R	0	0.794877	0	0	0	0	0	0	0.939369	0	0	0	0.264959	0	0.313123	0	0.458922	0	0.542345	0	-0.240961	#NUM!	#NUM!	NA	NA	NA
asRNA:CR43480	chrX	23.0881	13.5129	5.35742	13.8626	5.9754	19.1043	19.009	22.2394	11.2724	14.5841	13.4394	8.49222	13.9861	12.9808	17.5069	12.1719	8.87479	6.60871	5.63568	3.2377	-0.323931	-0.431553	-0.524372	0.67755	0.671058	0.543059
asRNA:CR43481	chr3L	387.879	318.746	376.091	328.438	353.544	354.937	392.06	367.961	345.688	480.509	439.659	473.441	360.905	345.64	368.57	464.536	36.984	14.9136	23.1921	21.8324	-0.0303184	-0.0926696	0.333854	0.843614	0.651842	0.0104177
asRNA:CR43609	chr2L	10.3896	14.3078	9.64335	63.9814	75.6883	48.2634	115.242	120.295	102.391	10.7462	10.5595	12.7383	11.4469	62.6444	112.643	11.348	2.50552	13.7613	9.23059	1.20766	-3.29872	-0.846498	-3.31124	2.28875e-24	0.00499887	1.72877e-25
asRNA:CR43614	chrX	1.1544	0.794877	3.21445	9.5972	2.9877	6.03292	2.37612	8.08707	3.75748	1.53517	1.91991	1.06153	1.72124	6.20594	4.74022	1.50554	1.30559	3.30815	2.97961	0.429958	-1.4615	0.388696	-1.65468	0.282177	0.782761	0.275601
asRNA:CR43615	chrX	2.30881	3.97438	12.8578	18.128	19.918	37.203	33.2657	30.3265	17.848	7.67587	6.71968	9.55374	6.38033	25.083	27.1467	7.9831	5.67113	10.5343	8.18593	1.44179	-2.08908	-0.114068	-1.76576	0.00137926	0.916831	0.00596622
asRNA:CR43629	chr3R	3.46321	2.38463	1.07148	3.19907	3.9836	3.01646	3.56418	0	0.939369	3.07035	1.91991	3.18458	2.30644	3.39971	1.50118	2.72495	1.19778	0.513839	1.84732	0.699518	0.619567	1.17931	0.860126	0.745605	0.532672	0.650459
asRNA:CR43636	chrX	0	1.58975	5.35742	1.06636	1.9918	6.03292	9.50449	12.1306	6.57558	0.767587	2.87986	1.06153	2.31572	3.03036	9.40356	1.56966	2.7515	2.64115	2.77888	1.14415	-2.02174	-1.63372	-2.58276	0.0444476	0.135031	0.0248167
asRNA:CR43637	chrX	0	0	0	0	0	2.01097	1.18806	2.02177	5.63622	1.53517	2.87986	0	0	0.670325	2.94868	1.47168	0	1.16104	2.36451	1.44098	#NUM!	-2.13714	-1.00261	0.137631	NA	0.567004
asRNA:CR43683	chr2L	0	4.76926	6.4289	7.46449	8.96309	12.0658	20.197	10.1088	12.2118	9.97863	6.71968	7.43069	3.73272	9.49781	14.1726	8.043	3.33744	2.34682	5.32226	1.71359	-1.9248	-0.577433	-0.817295	0.0210146	0.54187	0.311837
asRNA:CR43723	chr2R	19.6248	20.6668	20.3582	17.0617	16.9303	17.0933	32.0777	33.3591	25.363	49.8931	23.0389	32.9073	20.2166	17.0284	30.2666	35.2798	0.53521	0.0864426	4.29473	13.5834	-0.582185	-0.829781	0.221116	0.22656	0.130203	0.645463
asRNA:CR43728	chr2R	0	0	0	0	0	0	0	0	0	0	0	0	0	0	0	0	0	0	0	0	#DIV/0!	#DIV/0!	#DIV/0!	NA	NA	NA
asRNA:CR43730	chr2R	40.4041	48.4875	26.7871	39.4552	31.8688	42.2305	26.1373	19.2068	20.6661	29.9359	14.3993	15.9229	38.5596	37.8515	22.0034	20.086	10.9672	5.36377	3.65369	8.56416	0.809361	0.782622	-0.131535	0.0658145	0.132466	0.881127
asRNA:CR43735	chr2R	0	0	0	0	0	0	0	0	0	0	0	0	0	0	0	0	0	0	0	0	#DIV/0!	#DIV/0!	#DIV/0!	NA	NA	NA
asRNA:CR43767	chr2L	1.1544	4.76926	5.35742	2.13271	5.9754	10.0549	7.12837	14.1524	7.51495	5.37311	8.63959	4.24611	3.76036	6.05433	9.59856	6.08627	2.2759	3.96167	3.94844	2.28191	-1.35195	-0.664852	-0.657261	0.163784	0.560062	0.503443
asRNA:CR43786	chr2R	0	0	2.14297	0	0.995899	1.00549	5.94031	8.08707	3.75748	3.07035	4.79977	3.18458	0.714322	0.667129	5.92828	3.6849	1.23724	0.57777	2.16482	0.967195	-3.05297	-3.15158	-0.685989	0.0325915	0.0592845	0.528219
asRNA:CR43787	chr2R	0	0.794877	0	0	0.995899	1.00549	0	2.02177	0.939369	0	0	0	0.264959	0.667129	0.987045	0	0.458922	0.57777	1.01173	0	-1.89735	-0.565151	#NUM!	NA	NA	NA
asRNA:CR43806	chr2L	0	0	0	0	0	0	0	0	0	0	0	0	0	0	0	0	0	0	0	0	#DIV/0!	#DIV/0!	#DIV/0!	NA	NA	NA
asRNA:CR43809	chr2L	0	3.97438	9.64335	2.13271	8.96309	8.0439	14.2567	11.1197	12.2118	3.83793	8.63959	4.24611	4.53924	6.3799	12.5294	5.57454	4.84643	3.70678	1.59245	2.66224	-1.4648	-0.973713	-1.16839	0.109724	0.356464	0.210933
asRNA:CR43812	chr2R	0	1.58975	1.07148	1.06636	1.9918	4.02195	16.6329	4.04353	2.81811	2.30276	0.959954	0	0.887079	2.36003	7.8315	1.08757	0.810761	1.51181	7.64679	1.15667	-3.14215	-1.73048	-2.84818	0.0209513	0.154378	0.0338738
asRNA:CR43820	chr2L	0	2.38463	2.14297	0	0.995899	0	1.18806	0	0	0	0.959954	0	1.5092	0.331966	0.39602	0.319985	1.31258	0.574983	0.685927	0.55423	1.93014	-0.254538	-0.307572	NA	NA	NA
asRNA:CR43824	chr2L	1.1544	0.794877	0	1.06636	6.97129	4.02195	5.94031	7.07618	3.75748	4.60552	0.959954	6.36916	0.64976	4.01987	5.59132	3.97821	0.590725	2.95247	1.68665	2.75863	-3.10521	-0.476042	-0.491069	0.0801485	0.761409	0.712229
asRNA:CR43833	chrX	2.30881	0	3.21445	1.06636	0.995899	4.02195	1.18806	4.04353	5.63622	0	0	0	1.84108	2.02807	3.6226	0	1.65748	1.72711	2.25375	0	-0.976471	-0.836921	#NUM!	0.471568	NA	0.113282
asRNA:CR43842	chrX	0	0	0	0	0	0	0	0	0	0.767587	0.959954	0	0	0	0	0.575847	0	0	0	0.507889	#DIV/0!	#DIV/0!	#DIV/0!	NA	NA	NA
asRNA:CR43864	chrX	4.61761	4.76926	2.14297	2.13271	2.9877	6.03292	3.56418	5.05442	3.75748	4.60552	2.87986	4.24611	3.84328	3.71778	4.12536	3.9105	1.47447	2.05004	0.810371	0.910466	-0.102182	-0.150079	-0.0771678	0.944365	0.93943	0.964386
asRNA:CR43865	chr2L	0	0	0	0	0	0	0	0	0	0	0	0	0	0	0	0	0	0	0	0	#DIV/0!	#DIV/0!	#DIV/0!	NA	NA	NA
asRNA:CR43866	chr2L	25.3969	34.9746	30.0015	58.6496	52.7827	48.2634	35.6418	27.2938	29.1204	5.37311	7.67963	13.7999	30.1243	53.2319	30.6854	8.95086	4.79004	5.20764	4.38851	4.35483	-0.0266226	0.794739	-1.77745	0.987335	0.0480065	0.000128381
asRNA:CR43868	chr3L	0	0	3.21445	2.13271	0	2.01097	10.6926	4.04353	4.69685	1.53517	1.91991	0	1.07148	1.38123	6.47764	1.15169	1.85586	1.19773	3.6648	1.01578	-2.59586	-2.22952	-2.49171	0.0541912	0.125494	0.0755868
asRNA:CR43872	chr3L	2.30881	0.794877	1.07148	0	0.995899	2.01097	4.75224	2.02177	3.75748	4.60552	1.91991	2.12305	1.39172	1.00229	3.5105	2.88283	0.806169	1.0055	1.38189	1.49535	-1.3348	-1.80837	-0.284191	0.36494	0.368486	0.887257
asRNA:CR43875	chr3L	4.61761	3.97438	6.4289	4.26542	3.9836	6.03292	15.4448	9.09795	8.45432	5.37311	6.71968	0	5.00696	4.76065	10.999	4.03093	1.27274	1.1108	3.86358	3.55522	-1.13537	-1.20815	-1.44819	0.177299	0.230056	0.123833
asRNA:CR43876	chr3L	0	0	0	0	0	0	0	0	0	0	0	0	0	0	0	0	0	0	0	0	#DIV/0!	#DIV/0!	#DIV/0!	NA	NA	NA
asRNA:CR43877	chr3L	4.61761	2.38463	0	0	0	2.01097	2.37612	7.07618	1.87874	8.44345	9.59954	10.6153	2.33408	0.670325	3.77701	9.55275	2.30922	1.16104	2.86797	1.08666	-0.694392	-2.49431	1.33867	0.673555	0.393875	0.149142
asRNA:CR43889	chr3L	61.1833	55.6414	49.2882	58.6496	62.7416	52.2853	87.9165	63.6856	76.0889	16.1193	14.3993	11.6768	55.371	57.8922	75.897	14.0651	5.95216	5.26914	12.1166	2.24003	-0.454913	-0.390675	-2.43192	0.123935	0.275371	1.93545e-14
asRNA:CR43891	chr3L	0	0	0	0	0	0	0	0	1.87874	0	0	0	0	0	0.626246	0	0	0	1.08469	0	#NUM!	#NUM!	#NUM!	NA	NA	NA
asRNA:CR43898	chr2R	2.30881	0	1.07148	3.19907	0.995899	7.03841	4.75224	1.01088	0.939369	0.767587	1.91991	2.12305	1.12676	3.74446	2.23417	1.60352	1.15539	3.05795	2.18101	0.731027	-0.987553	0.745021	-0.478497	0.66753	0.659161	0.8526
asRNA:CR43903	chr3R	46.1761	34.9746	52.5027	57.5832	50.7909	65.3567	53.4628	59.6421	60.1196	46.8228	47.0378	72.1838	44.5511	57.9102	57.7415	55.3481	8.87631	7.28841	3.71318	14.5805	-0.374147	0.00421013	-0.0610741	0.258803	1	0.875365
asRNA:CR43906	chrX	31.1689	18.2822	23.5726	27.7253	27.8852	44.2414	35.6418	43.468	59.1803	30.7035	29.7586	46.7072	24.3412	33.284	46.0967	35.7231	6.47764	9.4898	11.9874	9.52424	-0.921262	-0.469836	-0.367807	0.0232036	0.361548	0.41846
asRNA:CR43908	chrX	3.46321	0.794877	1.07148	4.26542	4.9795	5.02744	2.37612	5.05442	4.69685	6.14069	2.87986	1.06153	1.77652	4.75745	4.04246	3.36069	1.46724	0.426783	1.45412	2.5735	-1.18618	0.234955	-0.266475	0.411368	0.897482	0.887257
asRNA:CR43916	chr3L	1.1544	4.76926	7.50038	6.39814	6.97129	6.03292	17.8209	10.1088	7.51495	6.14069	3.83982	3.18458	4.47468	6.46745	11.8149	4.38836	3.18323	0.47301	5.36062	1.55252	-1.40075	-0.869338	-1.42885	0.0924187	0.365132	0.103949
asRNA:CR43926	chr2L	0	0	0	0	0	0	0	0	0	0	0	0	0	0	0	0	0	0	0	0	#DIV/0!	#DIV/0!	#DIV/0!	NA	NA	NA
asRNA:CR43933	chr3L	17.316	19.077	26.7871	23.4598	16.9303	29.1591	17.8209	22.2394	24.4236	11.5138	26.8787	24.4151	21.0601	23.1831	21.4947	20.9359	5.0373	6.11912	3.36376	8.25221	-0.0294685	0.109095	-0.0380001	0.954955	0.912959	0.935949
asRNA:CR43936	chr2L	0	0	0	0	0	0	0	0	0	0	1.91991	0	0	0	0	0.63997	0	0	0	1.10846	#DIV/0!	#DIV/0!	#DIV/0!	NA	NA	NA
asRNA:CR43944	chr3L	40.4041	27.8207	36.4304	61.8486	41.8278	29.1591	54.6508	49.5333	32.8779	38.3793	29.7586	45.6457	34.8851	44.2785	45.6873	37.9279	6.43246	16.482	11.3846	7.95315	-0.389185	-0.0451877	-0.268537	0.379082	0.958128	0.604216
asRNA:CR43948	chr2R	1.1544	0	0	0	1.9918	0	0	0	0	0	0	0	0.384801	0.663933	0	0	0.666495	1.14997	0	0	#DIV/0!	#DIV/0!	#DIV/0!	NA	NA	NA
asRNA:CR43957	chr4	166.234	185.206	136.078	75.7113	105.565	80.439	116.43	84.9142	96.755	55.2662	52.7975	60.507	162.506	87.2385	99.3664	56.1903	24.7752	16.0465	15.9194	3.93696	0.709665	-0.187793	-0.822438	0.00165312	0.62164	0.00138201
asRNA:CR43959	chrX	0	0	0	0	0	0	0	0	0	0	0	0	0	0	0	0	0	0	0	0	#DIV/0!	#DIV/0!	#DIV/0!	NA	NA	NA
asRNA:CR43964	chr2R	24.2425	28.6156	28.93	29.858	27.8852	24.1317	27.3254	23.2503	25.363	14.5841	12.4794	16.9844	27.2627	27.2916	25.3129	14.6827	2.62032	2.90891	2.03801	2.25413	0.107055	0.108585	-0.785759	0.817694	0.875624	0.0958955
asRNA:CR43971	chr3L	49.6393	38.1541	36.4304	73.5786	58.7581	52.2853	49.8986	81.8815	75.1495	35.309	38.3982	29.7228	41.4079	61.5406	68.9766	34.4766	7.18048	10.9159	16.8614	4.39719	-0.736199	-0.164566	-1.00049	0.0191622	0.716621	0.00198021
asRNA:CR43979	chr3L	0	0	1.07148	0	2.9877	1.00549	15.4448	10.1088	4.69685	1.53517	2.87986	1.06153	0.357161	1.33106	10.0835	1.82552	0.618621	1.52022	5.37402	0.943299	-4.81928	-2.92135	-2.46562	0.000726099	0.00928707	0.0109825
asRNA:CR43981	chrX	3.46321	2.38463	1.07148	2.13271	2.9877	4.02195	4.75224	2.02177	4.69685	0.767587	2.87986	1.06153	2.30644	3.04745	3.82362	1.56966	1.19778	0.946035	1.5607	1.14415	-0.729271	-0.327335	-1.28449	0.582921	0.859547	0.400508
asRNA:CR44018	chr3R	0	0	0	0	0	0	0	0	0	0	0	0	0	0	0	0	0	0	0	0	#DIV/0!	#DIV/0!	#DIV/0!	NA	NA	NA
asRNA:CR44019	chr3R	0	3.97438	1.07148	1.06636	2.9877	1.00549	2.37612	2.02177	0	0.767587	1.91991	5.30763	1.68196	1.68651	1.46596	2.66504	2.05632	1.12727	1.28186	2.35996	0.198291	0.202195	0.86231	0.905057	NA	0.692068
asRNA:CR44020	chr3R	118.903	132.744	133.935	105.569	80.6678	97.5323	160.388	114.23	151.238	78.2938	74.8764	98.722	128.528	94.5898	141.952	83.9641	8.35613	12.7088	24.4403	12.8944	-0.143325	-0.585649	-0.757561	0.595927	0.0201121	0.000774796
asRNA:CR44021	chr3R	0	0	2.14297	3.19907	1.9918	3.01646	5.94031	4.04353	3.75748	3.83793	1.91991	1.06153	0.714322	2.73578	4.58044	2.27312	1.23724	0.65074	1.18633	1.42151	-2.68084	-0.743536	-1.01081	0.0997217	0.621865	0.46275
asRNA:CR44027	chr4	0	0	0	0	0	0	0	0	0	0	0	0	0	0	0	0	0	0	0	0	#DIV/0!	#DIV/0!	#DIV/0!	NA	NA	NA
asRNA:CR44029	chr4	94.661	96.975	102.862	245.262	180.258	286.564	340.974	236.547	214.176	221.833	217.91	255.828	98.1661	237.361	263.899	231.857	4.22844	53.5916	67.6794	20.8522	-1.42669	-0.152901	-0.186751	2.60198e-10	0.670361	0.520997
asRNA:CR44030	chr4	251.66	283.771	233.583	243.129	184.241	243.328	272.066	100.077	141.845	90.5752	102.715	112.522	256.338	223.566	171.329	101.937	25.4188	34.0564	89.7052	10.994	0.581275	0.383929	-0.749089	0.0607086	0.33201	0.0269027
asRNA:CR44031	chr4	4.61761	7.15389	4.28593	5.33178	0	3.01646	1.18806	9.09795	2.81811	3.83793	0.959954	4.24611	5.35248	2.78275	4.36804	3.01467	1.56886	2.67356	4.17652	1.7911	0.293221	-0.650476	-0.534988	0.819963	0.743191	0.753603
asRNA:CR44035	chr3R	2.30881	10.3334	5.35742	3.19907	3.9836	12.0658	8.31643	3.03265	1.87874	6.14069	7.67963	18.046	5.99987	6.41617	4.40927	10.6221	4.05069	4.90846	3.43253	6.47514	0.444391	0.541172	1.26846	0.722739	0.754096	0.245359
asRNA:CR44045	chr3R	0	0	0	0	0	0	2.37612	0	0	0	0	0	0	0	0.792041	0	0	0	1.37185	0	#NUM!	#NUM!	#NUM!	NA	NA	NA
asRNA:CR44046	chr3R	0	0	1.07148	1.06636	1.9918	2.01097	1.18806	0	0	0	0	0	0.357161	1.68971	0.39602	0	0.618621	0.539925	0.685927	0	-0.149	2.09313	#NUM!	NA	NA	NA
asRNA:CR44047	chr3R	2.30881	3.97438	9.64335	0	8.96309	18.0988	29.7015	19.2068	18.7874	7.67587	5.75973	11.6768	5.30885	9.02062	22.5652	8.3708	3.84506	9.04952	6.18377	3.01913	-2.08763	-1.3228	-1.43066	0.0150082	0.146234	0.0838332
asRNA:CR44049	chr3R	1.1544	1.58975	10.7148	7.46449	11.9508	31.1701	38.018	28.3047	35.696	14.5841	15.3593	14.8614	4.48633	16.8618	34.0062	14.9349	5.39843	12.5928	5.0723	0.392762	-2.92219	-1.01204	-1.18711	8.29211e-05	0.152459	0.063721
asRNA:CR44052	chr3R	0	0	0	0	0	0	0	0	0	0	0	0	0	0	0	0	0	0	0	0	#DIV/0!	#DIV/0!	#DIV/0!	NA	NA	NA
asRNA:CR44053	chrX	35.7865	34.9746	46.0738	67.1804	48.7991	42.2305	49.8986	34.37	54.4834	13.049	12.4794	32.9073	38.9449	52.7366	46.2507	19.4786	6.18708	12.9327	10.5412	11.6331	-0.248038	0.189332	-1.24759	0.608934	0.769976	0.00574384
asRNA:CR44054	chrX	12.6984	7.15389	11.7863	14.929	2.9877	10.0549	24.9493	14.1524	11.2724	5.37311	5.75973	10.6153	10.5462	9.32385	16.7914	7.24937	2.97302	6.00411	7.21022	2.92136	-0.670994	-0.848721	-1.21179	0.35329	0.336128	0.11844
asRNA:CR44062	chr3R	10.3896	4.76926	9.64335	3.19907	4.9795	7.03841	5.94031	7.07618	4.69685	5.37311	3.83982	6.36916	8.26741	5.07232	5.90445	5.19403	3.05238	1.92135	1.19007	1.27415	0.485634	-0.219154	-0.184948	0.607347	0.895573	0.887225
asRNA:CR44063	chr2L	0	0	0	0	0	0	0	0	0	0	0	0	0	0	0	0	0	0	0	0	#DIV/0!	#DIV/0!	#DIV/0!	NA	NA	NA
asRNA:CR44064	chr2L	1.1544	0	1.07148	0	2.9877	4.02195	8.31643	3.03265	2.81811	0.767587	0.959954	2.12305	0.741962	2.33655	4.7224	1.28353	0.643894	2.08854	3.11437	0.733382	-2.6701	-1.01514	-1.8794	0.0973498	0.509595	0.201431
asRNA:CR44065	chr2L	5.77201	6.35901	9.64335	6.39814	11.9508	9.04939	16.6329	14.1524	16.9086	12.2814	4.79977	5.30763	7.25813	9.13277	15.898	7.46293	2.08641	2.77727	1.518	4.18062	-1.13117	-0.799717	-1.09103	0.0883088	0.312713	0.129855
asRNA:CR44067	chr2R	0	0	1.07148	0	0	3.01646	10.6926	6.0653	2.81811	2.30276	0.959954	1.06153	0.357161	1.00549	6.52532	1.44141	0.618621	1.74156	3.95733	0.747674	-4.1914	-2.69815	-2.17856	0.0139985	0.0657395	0.0775765
asRNA:CR44069	chr2R	1.1544	0.794877	3.21445	4.26542	3.9836	1.00549	8.31643	9.09795	8.45432	1.53517	0.959954	1.06153	1.72124	3.08484	8.6229	1.18555	1.30559	1.80627	0.417142	0.307011	-2.32472	-1.48298	-2.86261	0.0151678	0.123458	0.00917007
asRNA:CR44071	chr2R	0	0	0	0	0	0	0	0	0	0	0	0	0	0	0	0	0	0	0	0	#DIV/0!	#DIV/0!	#DIV/0!	NA	NA	NA
asRNA:CR44083	chr2L	0	1.58975	2.14297	1.06636	2.9877	3.01646	10.6926	10.1088	7.51495	2.30276	1.91991	3.18458	1.24424	2.35684	9.43878	2.46908	1.11248	1.11768	1.69145	0.648534	-2.92334	-2.00175	-1.93462	0.00420098	0.0391652	0.0282192
asRNA:CR44087	chr3R	0	0	0	0	0	0	0	0	0	0	0	0	0	0	0	0	0	0	0	0	#DIV/0!	#DIV/0!	#DIV/0!	NA	NA	NA
asRNA:CR44093	chr3R	13.8528	19.8719	19.2867	17.0617	11.9508	7.03841	19.009	14.1524	16.9086	23.0276	20.159	26.5382	17.6705	12.017	16.69	23.2416	3.31911	5.01197	2.43568	3.19495	0.0823577	-0.473911	0.477726	0.884297	0.547492	0.397793
asRNA:CR44095	chr3R	75.0362	58.026	76.0753	49.0524	49.795	50.2744	45.1463	47.5115	45.0897	94.4132	79.6762	80.676	69.7125	49.7072	45.9159	84.9218	10.1341	0.615702	1.38217	8.23494	0.602425	0.114463	0.887143	0.0317603	0.813803	0.00061875
asRNA:CR44106	chr3R	0	0	0	0	0	0	0	0	0.939369	0	0	0	0	0	0.313123	0	0	0	0.542345	0	#NUM!	#NUM!	#NUM!	NA	NA	NA
asRNA:CR44107	chr3R	0	0	2.14297	0	1.9918	0	2.37612	2.02177	1.87874	0.767587	0	1.06153	0.714322	0.663933	2.09221	0.609705	1.23724	1.14997	0.256065	0.548092	-1.55038	-1.65592	-1.77884	NA	NA	0.443771
asRNA:CR44108	chrX	8.08082	5.56414	6.4289	7.46449	4.9795	9.04939	7.12837	12.1306	10.3331	4.60552	5.75973	2.12305	6.69128	7.16446	9.86401	4.16277	1.27869	2.05147	2.53389	1.85832	-0.559891	-0.461317	-1.24463	0.465767	0.648948	0.157428
asRNA:CR44114	chr2L	3.46321	3.17951	8.57186	5.33178	13.9426	18.0988	23.7612	31.3374	18.7874	12.2814	10.5595	11.6768	5.07153	12.4577	24.6287	11.5059	3.0347	6.51173	6.3198	0.873574	-2.27985	-0.983299	-1.09797	0.00041969	0.139309	0.0679607
asRNA:CR44115	chr2L	0	0.794877	0	1.06636	0.995899	2.01097	2.37612	7.07618	3.75748	0.767587	2.87986	2.12305	0.264959	1.35774	4.40326	1.9235	0.458922	0.566811	2.41566	1.07018	-4.05473	-1.69736	-1.19484	0.0426417	NA	0.320937
asRNA:CR44116	chr2L	0	0.794877	3.21445	3.19907	0	5.02744	14.2567	5.05442	4.69685	2.30276	0.959954	1.06153	1.33644	2.74217	8.00267	1.44141	1.67426	2.54467	5.41913	0.747674	-2.58208	-1.54516	-2.473	0.0388331	0.205151	0.0547499
asRNA:CR44119	chr2L	24.2425	19.8719	23.5726	14.929	22.9057	29.1591	55.8389	52.5659	34.7567	18.4221	26.8787	21.2305	22.5623	22.3313	47.7205	22.1771	2.35391	7.13244	11.3456	4.30705	-1.08069	-1.09554	-1.10554	0.00641997	0.0136096	0.00662524
asRNA:CR44124	chrX	76.1906	77.8979	50.3597	52.2514	52.7827	45.2469	38.018	46.5006	37.5748	74.4559	71.0366	66.8762	68.1494	50.0937	40.6978	70.7896	15.43	4.2058	5.03029	3.79588	0.743751	0.299678	0.798587	0.0111738	0.493723	0.00745388
asRNA:CR44130	chr2R	0	0	0	0	0	0	0	0	0	0	0	0	0	0	0	0	0	0	0	0	#DIV/0!	#DIV/0!	#DIV/0!	NA	NA	NA
asRNA:CR44134	chr3R	0	0	0	12.7963	3.9836	17.0933	22.5732	11.1197	6.57558	8.44345	11.5195	6.36916	0	11.2911	13.4228	8.77736	0	6.68321	8.24372	2.59133	#NUM!	-0.249508	-0.61283	0.00120385	0.847256	0.520743
asRNA:CR44137	chr3R	0	0.794877	5.35742	3.19907	9.95899	12.0658	19.009	14.1524	17.848	2.30276	7.67963	7.43069	2.05076	8.40797	17.0031	5.80436	2.89109	4.63241	2.53615	3.03503	-3.05157	-1.01597	-1.55059	0.00142769	0.234694	0.0473098
asRNA:CR44144	chr2L	0	0	0	0	0	0	0	0	0	0	0	0	0	0	0	0	0	0	0	0	#DIV/0!	#DIV/0!	#DIV/0!	NA	NA	NA
asRNA:CR44147	chr2L	0	2.38463	1.07148	1.06636	0	1.00549	8.31643	3.03265	0.939369	3.07035	2.87986	0	1.15204	0.690614	4.09615	1.9834	1.19435	0.598863	3.80178	1.72032	-1.83008	-2.56832	-1.04629	0.27332	NA	0.521182
asRNA:CR44155	chr3R	6.92642	7.94877	13.9293	13.8626	11.9508	22.1207	43.9583	36.3918	31.9386	15.3517	14.3993	15.9229	9.60149	15.978	37.4295	15.2247	3.78268	5.40492	6.07668	0.769704	-1.96285	-1.22809	-1.29777	2.58315e-05	0.0114788	0.00400274
asRNA:CR44160	chr3R	1.1544	0.794877	1.07148	0	0.995899	1.00549	3.56418	4.04353	0.939369	0.767587	4.79977	1.06153	1.00692	0.667129	2.84903	2.20963	0.188258	0.57777	1.67109	2.24794	-1.50052	-2.09443	-0.366666	0.389116	NA	0.841434
asRNA:CR44165	chr2R	2.30881	0	0	0	0	0	0	0	0	0	0	0	0.769602	0	0	0	1.33299	0	0	0	#DIV/0!	#DIV/0!	#DIV/0!	NA	NA	NA
asRNA:CR44168	chr2R	0	3.17951	2.14297	4.26542	1.9918	4.02195	3.56418	9.09795	5.63622	6.14069	3.83982	6.36916	1.77416	3.42639	6.09945	5.44989	1.62152	1.24834	2.79581	1.39904	-1.78154	-0.83199	-0.162452	0.158802	0.531353	0.901523
asRNA:CR44169	chr2R	10.3896	8.74365	11.7863	27.7253	6.97129	11.0604	19.009	14.1524	6.57558	13.049	26.8787	9.55374	10.3065	15.2523	13.2456	16.4938	1.52304	10.9937	6.26609	9.16182	-0.36196	0.203509	0.316407	0.710642	0.866289	0.726704
asRNA:CR44176	chr3R	0	0.794877	0	0	0.995899	1.00549	1.18806	0	0	0	0	0	0.264959	0.667129	0.39602	0	0.458922	0.57777	0.685927	0	-0.579806	0.752391	#NUM!	NA	NA	NA
asRNA:CR44179	chr3R	17.316	23.8463	35.3589	21.3271	22.9057	55.3018	67.7195	42.4571	53.544	46.0552	41.278	64.7531	25.5071	33.1782	54.5735	50.6955	9.13539	19.1758	12.6626	12.4064	-1.0973	-0.717966	-0.106345	0.0191256	0.196244	0.872074
asRNA:CR44181	chr2L	0	2.38463	1.07148	0	0	1.00549	0	0	0	0	0	0	1.15204	0.335162	0	0	1.19435	0.580518	0	0	#DIV/0!	#DIV/0!	#DIV/0!	NA	NA	NA
asRNA:CR44182	chr2L	0	0.794877	1.07148	3.19907	0	1.00549	3.56418	2.02177	0	3.07035	0	2.12305	0.62212	1.40152	1.86198	1.73113	0.55624	1.63589	1.78746	1.57225	-1.58158	-0.40985	-0.105123	0.595927	NA	0.990808
asRNA:CR44192	chr3R	0	0	0	0	0	0	2.37612	0	0	0	0	0	0	0	0.792041	0	0	0	1.37185	0	#NUM!	#NUM!	#NUM!	NA	NA	NA
asRNA:CR44201	chr2R	2.30881	4.76926	4.28593	3.19907	1.9918	2.01097	20.197	4.04353	8.45432	0.767587	1.91991	3.18458	3.788	2.40061	10.8983	1.95736	1.30362	0.691548	8.34947	1.20893	-1.52459	-2.18263	-2.47712	0.0755934	0.0383657	0.0138419
asRNA:CR44205	chr2R	0	0	0	0	0	0	0	0	0	0	0	0	0	0	0	0	0	0	0	0	#DIV/0!	#DIV/0!	#DIV/0!	NA	NA	NA
asRNA:CR44207	chr2R	0	0	0	0	0	0	0	0	0	0	0	0	0	0	0	0	0	0	0	0	#DIV/0!	#DIV/0!	#DIV/0!	NA	NA	NA
asRNA:CR44224	chr2L	0	0.794877	0	0	0.995899	4.02195	1.18806	1.01088	0.939369	0.767587	0	1.06153	0.264959	1.67262	1.0461	0.609705	0.458922	2.09463	0.128033	0.548092	-1.98119	0.677079	-0.778845	NA	NA	NA
asRNA:CR44228	chr3R	0	0	0	0	0	0	1.18806	0	0	0	0	0	0	0	0.39602	0	0	0	0.685927	0	#NUM!	#NUM!	#NUM!	NA	NA	NA
asRNA:CR44235	chr3R	0	0	0	0	0	0	0	0	0	0	0	0	0	0	0	0	0	0	0	0	#DIV/0!	#DIV/0!	#DIV/0!	NA	NA	NA
asRNA:CR44237	chr3R	0	0	0	0	0	0	0	0	0	0	0	0	0	0	0	0	0	0	0	0	#DIV/0!	#DIV/0!	#DIV/0!	NA	NA	NA
asRNA:CR44238	chr3R	0	0	0	0	0	0	0	0	0	0	0	0	0	0	0	0	0	0	0	0	#DIV/0!	#DIV/0!	#DIV/0!	NA	NA	NA
asRNA:CR44266	chrX	0	0.794877	2.14297	0	1.9918	7.03841	8.31643	3.03265	1.87874	0.767587	0.959954	3.18458	0.979281	3.01007	4.40927	1.63737	1.08332	3.62801	3.43253	1.34337	-2.17075	-0.550744	-1.42916	0.232528	0.778374	0.392925
asRNA:CR44267	chr3R	0	0	3.21445	1.06636	0	4.02195	5.94031	4.04353	1.87874	0.767587	1.91991	2.12305	1.07148	1.6961	3.95419	1.60352	1.85586	2.08362	2.03226	0.731027	-1.88377	-1.22116	-1.30214	0.265732	NA	0.428573
asRNA:CR44275	chr2R	1.1544	0	0	1.06636	0	0	0	1.01088	0.939369	1.53517	0	0	0.384801	0.355452	0.650084	0.511724	0.666495	0.615661	0.564124	0.886333	-0.756515	-0.870972	-0.345259	NA	NA	NA
asRNA:CR44287	chr3R	0	0	0	0	0	0	0	0	0	0	0	0	0	0	0	0	0	0	0	0	#DIV/0!	#DIV/0!	#DIV/0!	NA	NA	NA
asRNA:CR44291	chr3R	94.661	99.3596	78.2183	91.7066	86.6432	81.4445	90.2927	78.8489	83.6039	89.04	66.2368	61.5686	90.7463	86.5981	84.2485	72.2818	11.101	5.13122	5.74905	14.6996	0.107188	0.0396849	-0.221018	0.702013	0.932112	0.500957
asRNA:CR44293	chr2R	0	0	0	0	0	0	0	0	0	0	0	0	0	0	0	0	0	0	0	0	#DIV/0!	#DIV/0!	#DIV/0!	NA	NA	NA
asRNA:CR44297	chr2R	0	0	0	0	0	0	1.18806	0	0.939369	0	0.959954	1.06153	0	0	0.709143	0.673827	0	0	0.626598	0.585757	#NUM!	#NUM!	-0.0736992	NA	NA	NA
asRNA:CR44304	chr2R	0	0	0	0	0	1.00549	0	0	0	0	0	0	0	0.335162	0	0	0	0.580518	0	0	#DIV/0!	#DIV/0!	#DIV/0!	NA	NA	NA
asRNA:CR44321	chr3R	8.08082	11.9232	16.0722	15.9953	14.9385	9.04939	8.31643	4.04353	12.2118	14.5841	7.67963	6.36916	12.0254	13.3277	8.19059	9.54431	3.9967	3.74265	4.08559	4.41353	0.554047	0.702393	0.220675	0.504388	0.47328	0.83698
asRNA:CR44340	chrX	13.8528	18.2822	8.57186	10.6636	11.9508	13.0713	17.8209	17.185	15.0299	7.67587	9.59954	11.6768	13.569	11.8952	16.6786	9.65074	4.86137	1.20485	1.46279	2.00096	-0.29769	-0.487616	-0.789289	0.673156	0.537664	0.215721
asRNA:CR44351	chr3L	0	0	3.21445	1.06636	0	4.02195	8.31643	8.08707	2.81811	2.30276	4.79977	0	1.07148	1.6961	6.4072	2.36751	1.85586	2.08362	3.11036	2.40054	-2.58009	-1.91747	-1.43632	0.109398	0.25521	0.310818
asRNA:CR44358	chrX	0	0	0	0	0	0	0	0	0	0	0	0	0	0	0	0	0	0	0	0	#DIV/0!	#DIV/0!	#DIV/0!	NA	NA	NA
asRNA:CR44367	chr2R	42.7129	45.308	41.7878	34.1234	37.8442	35.1921	23.7612	32.3483	17.848	40.6821	34.5584	37.1534	43.2696	35.7199	24.6525	37.4646	1.8249	1.91572	7.2911	3.0737	0.811619	0.534993	0.603795	0.0233763	0.248219	0.130372
asRNA:CR44368	chr2R	131.602	140.693	115.72	135.427	164.323	172.944	163.952	162.752	200.086	178.848	117.114	160.291	129.338	157.565	175.597	152.084	12.6394	19.6503	21.2165	31.6742	-0.441115	-0.156321	-0.207396	0.0488066	0.624028	0.43212
asRNA:CR44370	chr2R	0	3.97438	2.14297	0	0.995899	0	4.75224	0	0.939369	0.767587	1.91991	0	2.03912	0.331966	1.8972	0.895832	1.98923	0.574983	2.51675	0.966358	0.104069	-2.51477	-1.08258	0.919356	NA	0.724788
asRNA:CR44372	chr2R	0	0.794877	0	0	0	0	0	0	0	0	0	0	0.264959	0	0	0	0.458922	0	0	0	#DIV/0!	#DIV/0!	#DIV/0!	NA	NA	NA
asRNA:CR44374	chrX	0	0	1.07148	0	3.9836	1.00549	0	2.02177	1.87874	0.767587	0.959954	0	0.357161	1.66303	1.30017	0.575847	0.618621	2.0716	1.12825	0.507889	-1.86405	0.355114	-1.17494	NA	NA	0.726169
asRNA:CR44375	chr2R	47.3305	34.1797	36.4304	33.057	37.8442	30.1646	49.8986	40.4353	37.5748	9.97863	5.75973	8.49222	39.3135	33.6886	42.6362	8.07686	7.0335	3.87854	6.44996	2.1399	-0.117053	-0.339819	-2.40021	0.787456	0.505075	2.39368e-08
asRNA:CR44381	chrX	70.4186	96.975	87.8616	90.6402	102.578	87.4774	114.054	78.8489	70.4527	85.2021	73.9165	97.6605	85.085	93.5651	87.7852	85.593	13.4942	7.96368	23.1335	11.8768	-0.0450714	0.0919933	-0.0364838	0.938116	0.819738	0.944702
asRNA:CR44382	chrX	61.1833	79.4877	87.8616	90.6402	72.7006	87.4774	58.215	47.5115	52.6047	60.6393	53.7574	56.2609	76.1775	83.6061	52.7771	56.8859	13.6437	9.57589	5.35383	3.48326	0.529455	0.663697	0.10816	0.0494531	0.0240254	0.776029
asRNA:CR44386	chr2R	3.46321	9.53852	7.50038	9.5972	4.9795	5.02744	10.6926	8.08707	6.57558	5.37311	4.79977	5.30763	6.83404	6.53471	8.45173	5.16017	3.09199	2.6523	2.08257	0.313827	-0.306509	-0.371124	-0.711829	0.777489	0.761409	0.474157
asRNA:CR44390	chr2R	135.065	77.1031	82.5042	115.166	103.574	146.801	103.361	114.23	99.5731	138.166	71.9966	102.968	98.2241	121.847	105.721	104.377	32.0193	22.3748	7.60802	33.107	-0.106119	0.204803	-0.0184673	0.769057	0.659489	0.980891
asRNA:CR44416	chr2R	0	0	3.21445	3.19907	2.9877	8.0439	4.75224	3.03265	4.69685	1.53517	2.87986	2.12305	1.07148	4.74355	4.16058	2.17936	1.85586	2.86013	0.977209	0.674111	-1.95718	0.189184	-0.932878	0.240969	0.909944	0.538498
asRNA:CR44427	chrX	0	0	0	0	0	0	0	0	0	0	0	0	0	0	0	0	0	0	0	0	#DIV/0!	#DIV/0!	#DIV/0!	NA	NA	NA
asRNA:CR44429	chrX	1.1544	8.74365	5.35742	10.6636	8.96309	4.02195	4.75224	4.04353	3.75748	9.21104	3.83982	9.55374	5.08515	7.88287	4.18442	7.53487	3.80194	3.45006	0.51213	3.20459	0.281265	0.913693	0.848555	0.811281	0.486483	0.461969
asRNA:CR44431	chrX	0	3.17951	5.35742	3.19907	2.9877	7.03841	16.6329	11.1197	9.39369	2.30276	3.83982	2.12305	2.84564	4.40839	12.3821	2.75521	2.69427	2.28011	3.78108	0.943585	-2.12143	-1.48993	-2.16802	0.0136975	0.0949181	0.0144726
asRNA:CR44509	chr2R	0	0	1.07148	0	0	0	0	0	0	0	0	0	0.357161	0	0	0	0.618621	0	0	0	#DIV/0!	#DIV/0!	#DIV/0!	NA	NA	NA
asRNA:CR44512	chrX	86.5802	74.7184	70.7179	84.2421	79.6719	66.3622	89.1046	59.6421	70.4527	73.6883	80.6362	58.384	77.3388	76.7587	73.0665	70.9028	8.24943	9.28915	14.9041	11.3846	0.0819836	0.0711215	-0.0433664	0.800298	0.871525	0.939595
asRNA:CR44592	chr2L	0	0	0	0	0	0	0	0	0	0	0	0	0	0	0	0	0	0	0	0	#DIV/0!	#DIV/0!	#DIV/0!	NA	NA	NA
asRNA:CR44599	chr2L	274.748	352.925	267.871	228.2	275.864	235.284	337.409	276.982	319.386	231.044	360.943	187.89	298.515	246.449	311.259	259.959	47.2463	25.7189	31.0225	90.077	-0.0603138	-0.336824	-0.259832	0.855702	0.265156	0.359294
asRNA:CR44600	chr2L	6.92642	1.58975	1.07148	2.13271	1.9918	6.03292	5.94031	4.04353	5.63622	3.83793	0	3.18458	3.19588	3.38581	5.20668	2.34084	3.24111	2.29355	1.01873	2.05338	-0.70415	-0.620864	-1.15334	0.562399	0.71121	0.435892
asRNA:CR44653	chr2R	0	0	0	0	0.995899	0	0	0	0.939369	0	0	0	0	0.331966	0.313123	0	0	0.574983	0.542345	0	#NUM!	0.0843073	#NUM!	NA	NA	NA
asRNA:CR44690	chrX	136.22	137.514	128.578	171.683	197.188	179.982	150.884	141.524	139.966	215.692	165.112	179.398	134.104	182.951	144.124	186.734	4.82899	13.009	5.9053	26.0756	-0.103966	0.344143	0.373669	0.650339	0.100457	0.0431005
asRNA:CR44703	chr2R	0	0	0	0	0	0	0	0	0	0	0	0	0	0	0	0	0	0	0	0	#DIV/0!	#DIV/0!	#DIV/0!	NA	NA	NA
asRNA:CR44704	chr2R	3.46321	12.718	18.2152	8.53085	22.9057	25.1372	97.421	33.3591	53.544	13.049	16.3192	12.7383	11.4655	18.8579	61.4414	14.0355	7.45534	9.01282	32.753	1.98385	-2.42191	-1.70404	-2.13013	1.53745e-05	0.00279924	0.00010139
asRNA:CR44724	chr2R	72.7274	58.8209	62.146	41.5879	47.8032	47.2579	32.0777	28.3047	25.363	43.7524	40.3181	37.1534	64.5648	45.5496	28.5818	40.408	7.2619	3.44181	3.3659	3.30041	1.17565	0.672344	0.499544	8.07651e-05	0.0719817	0.17078
asRNA:CR44793	chr2L	3.46321	7.15389	3.21445	15.9953	22.9057	22.1207	8.31643	10.1088	6.57558	7.67587	6.71968	9.55374	4.61052	20.3406	8.33362	7.9831	2.20614	3.7835	1.76669	1.44179	-0.854014	1.28735	-0.0619941	0.382262	0.0421322	0.948099
asRNA:CR44806	chr2R	8.08082	3.97438	5.35742	0	1.9918	2.01097	4.75224	6.0653	0.939369	3.07035	5.75973	3.18458	5.80421	1.33426	3.91897	4.00488	2.08936	1.15554	2.66262	1.52081	0.566624	-1.55444	0.0312856	0.607049	0.48747	0.978796
asRNA:CR44807	chr2R	139.683	123.206	105.005	58.6496	44.8155	42.2305	21.3851	12.1306	16.9086	59.1042	56.6373	68.9993	122.631	48.5652	16.8081	61.5802	17.3458	8.82848	4.62807	6.54237	2.8671	1.53076	1.87331	9.44234e-23	3.84946e-05	1.63508e-08
asRNA:CR44818	chr2L	0	0	0	0	0	0	0	0	0	0	0	0	0	0	0	0	0	0	0	0	#DIV/0!	#DIV/0!	#DIV/0!	NA	NA	NA
asRNA:CR44840	chrX	0	0	0	0	0	0	0	0	0	0	0	0	0	0	0	0	0	0	0	0	#DIV/0!	#DIV/0!	#DIV/0!	NA	NA	NA
asRNA:CR44841	chrX	0	0.794877	1.07148	0	0.995899	5.02744	4.75224	0	1.87874	2.30276	0	0	0.62212	2.00778	2.21033	0.767587	0.55624	2.66209	2.39341	1.3295	-1.829	-0.13866	-1.52586	0.526523	NA	0.616946
asRNA:CR44843	chr3L	24.2425	14.3078	13.9293	5.33178	11.9508	15.0823	10.6926	6.0653	15.0299	29.9359	21.119	22.2921	17.4932	10.7883	10.5959	24.449	5.84811	4.97813	4.48309	4.78786	0.723283	0.0259578	1.20627	0.297124	0.989579	0.043353
asRNA:CR44847	chr2L	0	0	0	1.06636	0	2.01097	3.56418	4.04353	3.75748	0	0.959954	0	0	1.02578	3.7884	0.319985	0	1.0061	0.241166	0.55423	#NUM!	-1.88487	-3.56551	0.0343239	NA	0.0711873
asRNA:CR44849	chr2L	0	0	1.07148	0	0	1.00549	0	0	2.81811	0	0.959954	0	0.357161	0.335162	0.939369	0.319985	0.618621	0.580518	1.62704	0.55423	-1.39512	-1.48683	-1.55369	NA	NA	NA
asRNA:CR44850	chr2L	0	0	0	0	0	0	0	0	0	0	0	0	0	0	0	0	0	0	0	0	#DIV/0!	#DIV/0!	#DIV/0!	NA	NA	NA
asRNA:CR44866	chr2L	3.46321	5.56414	2.14297	7.46449	5.9754	6.03292	3.56418	10.1088	7.51495	6.14069	6.71968	3.18458	3.72344	6.49094	7.06266	5.34832	1.72537	0.843614	3.29568	1.89608	-0.923576	-0.121784	-0.401126	0.371217	0.927147	0.721601
asRNA:CR44872	chr2L	0	0	0	0	0	0	0	0	0	0	0	0	0	0	0	0	0	0	0	0	#DIV/0!	#DIV/0!	#DIV/0!	NA	NA	NA
asRNA:CR44873	chr2L	0	0	1.07148	0	0	3.01646	7.12837	0	1.87874	0.767587	1.91991	0	0.357161	1.00549	3.00237	0.895832	0.618621	1.74156	3.69463	0.966358	-3.07145	-1.57821	-1.7448	0.260366	NA	0.440181
asRNA:CR44891	chrX	3.46321	0.794877	1.07148	2.13271	0.995899	3.01646	7.12837	4.04353	5.63622	0.767587	0.959954	2.12305	1.77652	2.04836	5.60271	1.28353	1.46724	1.01292	1.54269	0.733382	-1.65707	-1.45166	-2.126	0.125803	0.250728	0.0891548
asRNA:CR44892	chrX	30.0145	28.6156	33.216	26.6589	21.9098	42.2305	35.6418	36.3918	30.9992	24.5628	21.119	19.1075	30.6153	30.2664	34.3443	21.5964	2.35833	10.6298	2.9211	2.7588	-0.165815	-0.182353	-0.669278	0.726268	0.77586	0.139813
asRNA:CR44894	chrX	189.322	220.976	201.439	174.882	180.258	182.999	262.562	293.156	278.053	224.903	213.11	210.182	203.912	179.38	277.924	216.065	15.9712	4.1288	15.2977	7.79251	-0.446741	-0.631673	-0.363223	0.0018524	2.02106e-05	0.0141235
asRNA:CR44896	chrX	0	0	1.07148	2.13271	1.9918	1.00549	1.18806	2.02177	0	0.767587	0	3.18458	0.357161	1.71	1.06994	1.31739	0.618621	0.61418	1.01605	1.66196	-1.58289	0.676462	0.300148	NA	NA	0.9293
asRNA:CR44897	chr2L	0	0	0	0	0	0	0	0	0	0	0	0	0	0	0	0	0	0	0	0	#DIV/0!	#DIV/0!	#DIV/0!	NA	NA	NA
asRNA:CR44907	chr2L	16.1616	5.56414	9.64335	6.39814	2.9877	4.02195	9.50449	14.1524	15.9693	6.90828	9.59954	15.9229	10.4564	4.46926	13.2087	10.8102	5.34532	1.74867	3.3341	4.62766	-0.337107	-1.56338	-0.289091	0.623948	0.0929218	0.721601
asRNA:CR44910	chr2L	2.30881	3.17951	3.21445	4.26542	3.9836	7.03841	9.50449	8.08707	9.39369	4.60552	3.83982	7.43069	2.90092	5.09581	8.99508	5.29201	0.513085	1.68823	0.788315	1.89131	-1.63263	-0.819825	-0.765321	0.069131	0.413065	0.374812
asRNA:CR44911	chr2L	3.46321	3.17951	2.14297	1.06636	3.9836	4.02195	9.50449	3.03265	4.69685	8.44345	1.91991	2.12305	2.92856	3.02397	5.74466	4.16214	0.694975	1.69545	3.36075	3.70912	-0.97203	-0.92578	-0.464897	0.43778	0.559023	0.773135
asRNA:CR44958	chrX	0	0	1.07148	0	0	0	0	0	1.87874	0	0	2.12305	0.357161	0	0.626246	0.707685	0.618621	0	1.08469	1.22575	-0.810155	#NUM!	0.176377	NA	NA	NA
asRNA:CR44959	chrX	10.3896	3.97438	10.7148	3.19907	8.96309	2.01097	5.94031	4.04353	10.3331	9.97863	5.75973	5.30763	8.35961	4.72438	6.7723	7.01533	3.8012	3.71859	3.22625	2.57623	0.30379	-0.519521	0.0508648	0.798951	0.732648	0.965171
asRNA:CR44960	chrX	21.9336	11.9232	11.7863	20.2608	20.9139	24.1317	21.3851	16.1741	13.1512	13.8166	21.119	23.3536	15.2144	21.7688	16.9035	19.4297	5.81947	2.07224	4.16514	4.98789	-0.151884	0.364941	0.200946	0.813417	0.603978	0.782122
asRNA:CR44961	chrX	4.61761	0	8.57186	7.46449	5.9754	6.03292	5.94031	9.09795	13.1512	4.60552	5.75973	1.06153	4.39649	6.49094	9.39647	3.80892	4.29021	0.843614	3.61469	2.4483	-1.09577	-0.533693	-1.30274	0.265748	0.672443	0.249479
asRNA:CR44962	chrX	2.30881	5.56414	4.28593	1.06636	0	6.03292	5.94031	5.05442	1.87874	1.53517	3.83982	8.49222	4.05296	2.36643	4.29115	4.6224	1.64012	3.21973	2.13565	3.54393	-0.0823902	-0.858655	0.107277	0.978899	0.69967	0.956935
asRNA:CR44968	chr2L	2.30881	0	1.07148	2.13271	0	2.01097	0	3.03265	4.69685	1.53517	0	2.12305	1.12676	1.38123	2.5765	1.21941	1.15539	1.19773	2.38142	1.09618	-1.19323	-0.89946	-1.07923	0.521599	NA	0.603465
asRNA:CR44969	chr2L	13.8528	29.4104	26.7871	14.929	8.96309	18.0988	30.8896	24.2612	17.848	8.44345	16.3192	8.49222	23.3501	13.9969	24.3329	11.085	8.32883	4.63861	6.52108	4.53307	-0.0594806	-0.797798	-1.13431	0.961925	0.248713	0.0618105
asRNA:CR44972	chr2L	0	0	2.14297	0	1.9918	5.02744	5.94031	7.07618	4.69685	0.767587	5.75973	0	0.714322	2.33974	5.90445	2.17577	1.23724	2.53171	1.19007	3.12743	-3.04715	-1.33545	-1.44027	0.098746	0.414163	0.321879
asRNA:CR44975	chr2L	23.0881	23.8463	30.0015	11.7299	16.9303	15.0823	35.6418	19.2068	15.0299	20.7248	17.2792	26.5382	25.6453	14.5808	23.2928	21.5141	3.79161	2.6362	10.8966	4.67968	0.138807	-0.675813	-0.114607	0.787456	0.331333	0.894174
asRNA:CR44976	chr2L	1.1544	1.58975	4.28593	2.13271	3.9836	11.0604	16.6329	7.07618	8.45432	5.37311	2.87986	1.06153	2.34336	5.72556	10.7211	3.10483	1.69634	4.71185	5.16588	2.16458	-2.1938	-0.904968	-1.78787	0.0343706	0.403928	0.0840944
asRNA:CR44981	chr2L	0	1.58975	0	1.06636	0.995899	2.01097	7.12837	2.02177	5.63622	0	0	1.06153	0.529918	1.35774	4.92878	0.353842	0.917845	0.566811	2.62577	0.612873	-3.21739	-1.86002	-3.80005	0.0397493	NA	0.0327763
asRNA:CR44982	chr2L	1.1544	2.38463	3.21445	1.06636	0	3.01646	0	3.03265	0	0	0.959954	1.06153	2.25116	1.36094	1.01088	0.673827	1.03649	1.52966	1.7509	0.585757	1.15505	0.428986	-0.585166	0.568107	NA	0.883786
asRNA:CR44984	chr2L	35.7865	27.8207	35.3589	21.3271	21.9098	32.1756	23.7612	27.2938	19.7268	16.8869	9.59954	13.7999	32.9887	25.1375	23.5939	13.4288	4.48073	6.10213	3.78632	3.65783	0.483556	0.0914245	-0.81309	0.287298	0.905128	0.128241
asRNA:CR44987	chr2L	24.2425	18.2822	21.4297	36.2561	47.8032	53.2908	52.2747	55.5986	69.5133	45.2876	47.0378	27.5997	21.3181	45.7834	59.1289	39.975	2.98171	8.69512	9.14548	10.753	-1.47178	-0.369039	-0.564764	2.83277e-05	0.408571	0.133116
asRNA:CR44989	chr2L	1.1544	0	1.07148	1.06636	0	1.00549	2.37612	7.07618	2.81811	0	0.959954	1.06153	0.741962	0.690614	4.09014	0.673827	0.643894	0.598863	2.59542	0.585757	-2.46273	-2.5662	-2.6017	0.0792823	NA	0.0880176
asRNA:CR44990	chr2L	0	0	0	0	0	0	0	0	0	0	0	0	0	0	0	0	0	0	0	0	#DIV/0!	#DIV/0!	#DIV/0!	NA	NA	NA
asRNA:CR44992	chr2L	1.1544	2.38463	0	3.19907	2.9877	0	2.37612	6.0653	0	7.67587	0	2.12305	1.17968	2.06226	2.81381	3.26631	1.19252	1.78909	3.05625	3.96358	-1.25413	-0.448301	0.215137	0.6464	0.891634	0.90844
asRNA:CR44995	chr2L	0	0	1.07148	0	1.9918	1.00549	0	1.01088	0	0	0	0	0.357161	0.999095	0.336961	0	0.618621	0.995915	0.583634	0	0.0839927	1.56804	#NUM!	NA	NA	NA
asRNA:CR44996	chr2L	45.0217	36.5643	46.0738	6.39814	22.9057	15.0823	9.50449	23.2503	15.0299	11.5138	14.3993	7.43069	42.5533	14.7954	15.9282	11.1146	5.21318	8.25751	6.9168	3.50142	1.41768	-0.10644	-0.519131	0.00379397	0.924677	0.49955
asRNA:CR44998	chrX	1.1544	0	3.21445	3.19907	1.9918	5.02744	4.75224	2.02177	4.69685	1.53517	1.91991	3.18458	1.45628	3.4061	3.82362	2.21322	1.62835	1.52837	1.5607	0.862937	-1.39265	-0.166818	-0.788791	0.350505	0.935801	0.601419
asRNA:CR45000	chrX	16.1616	12.718	15.0008	17.0617	14.9385	23.1262	21.3851	16.1741	16.9086	14.5841	13.4394	14.8614	14.6268	18.3755	18.156	14.295	1.752	4.24902	2.82053	0.753826	-0.311828	0.0173374	-0.344937	0.591218	0.980579	0.597166
asRNA:CR45001	chrX	2.30881	0.794877	1.07148	1.06636	2.9877	1.00549	3.56418	4.04353	2.81811	0	0	0	1.39172	1.68651	3.47527	0	0.806169	1.12727	0.617532	0	-1.32026	-1.04308	#NUM!	0.310473	NA	0.0633887
asRNA:CR45007	chr2L	3.46321	7.15389	10.7148	4.26542	8.96309	10.0549	9.50449	22.2394	15.0299	10.7462	8.63959	5.30763	7.11064	7.76113	15.5913	8.23115	3.62601	3.07619	6.386	2.7422	-1.13269	-1.0064	-0.921574	0.110378	0.222392	0.222166
asRNA:CR45008	chr2L	0	0.794877	1.07148	0	0	0	1.18806	0	0.939369	1.53517	0	0	0.62212	0	0.709143	0.511724	0.55624	0	0.626598	0.886333	-0.188885	#NUM!	-0.470711	NA	NA	NA
asRNA:CR45009	chrX	4.61761	3.17951	1.07148	4.26542	2.9877	3.01646	0	6.0653	1.87874	6.14069	1.91991	3.18458	2.9562	3.42319	2.64801	3.74839	1.78358	0.729534	3.10496	2.16614	0.158834	0.370433	0.501363	0.945609	0.885181	0.773932
asRNA:CR45015	chr3R	0	0	0	0	0	0	0	0	0	0	0	0	0	0	0	0	0	0	0	0	#DIV/0!	#DIV/0!	#DIV/0!	NA	NA	NA
asRNA:CR45016	chr3R	10.3896	11.9232	10.7148	7.46449	6.97129	7.03841	4.75224	2.02177	1.87874	14.5841	25.9188	16.9844	11.0092	7.15807	2.88425	19.1624	0.808034	0.267486	1.61931	5.97296	1.93244	1.31137	2.73201	0.028352	0.324334	0.000145983
asRNA:CR45024	chr3R	0	0	0	0	0	0	0	0	0	0	0	0	0	0	0	0	0	0	0	0	#DIV/0!	#DIV/0!	#DIV/0!	NA	NA	NA
asRNA:CR45026	chr3L	64.6465	50.8721	76.0753	52.2514	25.8934	84.4609	111.678	70.7618	80.7858	16.1193	12.4794	47.7687	63.8647	54.2019	87.7418	25.4558	12.6198	29.3325	21.3265	19.4091	-0.458246	-0.69492	-1.78527	0.391959	0.258714	0.000716599
asRNA:CR45028	chr3R	4.61761	4.76926	4.28593	7.46449	5.9754	0	8.31643	4.04353	3.75748	3.07035	3.83982	3.18458	4.5576	4.47996	5.37248	3.36491	0.247189	3.95056	2.55354	0.415225	-0.237313	-0.262102	-0.675018	0.869347	0.890878	0.641607
asRNA:CR45041	chr3R	0	0	0	0	0	0	0	0	0	0	0	0	0	0	0	0	0	0	0	0	#DIV/0!	#DIV/0!	#DIV/0!	NA	NA	NA
asRNA:CR45042	chr3L	1.1544	0	0	0	0	0	0	1.01088	0	0	0	0	0.384801	0	0.336961	0	0.666495	0	0.583634	0	0.19153	#NUM!	#NUM!	NA	NA	NA
asRNA:CR45044	chr3R	0	0	2.14297	5.33178	2.9877	6.03292	9.50449	7.07618	8.45432	3.07035	4.79977	2.12305	0.714322	4.78413	8.345	3.33106	1.23724	1.59477	1.21784	1.35727	-3.54627	-0.802654	-1.32493	0.00691748	0.439443	0.161771
asRNA:CR45046	chr3R	2.30881	1.58975	2.14297	0	0	2.01097	0	1.01088	1.87874	1.53517	0.959954	1.06153	2.01384	0.670325	0.963207	1.18555	0.376515	1.16104	0.940276	0.307011	1.06403	-0.522986	0.29964	NA	NA	0.93677
asRNA:CR45053	chr3R	5.77201	5.56414	7.50038	8.53085	5.9754	13.0713	21.3851	14.1524	10.3331	1.53517	9.59954	6.36916	6.27884	9.19253	15.2902	5.83463	1.06298	3.59395	5.61319	4.05867	-1.28403	-0.734072	-1.38989	0.0881742	0.418495	0.0753964
asRNA:CR45056	chr3R	0	0	0	0	0	0	0	0	0	0.767587	0	0	0	0	0	0.255862	0	0	0	0.443166	#DIV/0!	#DIV/0!	#DIV/0!	NA	NA	NA
asRNA:CR45104	chr3R	0	0	0	0	0	0	0	0	0	0	0	0	0	0	0	0	0	0	0	0	#DIV/0!	#DIV/0!	#DIV/0!	NA	NA	NA
asRNA:CR45108	chr2R	2.30881	6.35901	2.14297	4.26542	2.9877	5.02744	3.56418	3.03265	1.87874	1.53517	0.959954	2.12305	3.6036	4.09352	2.82519	1.53939	2.3877	1.03068	0.861662	0.581561	0.351089	0.534993	-0.875986	0.75406	0.742383	0.657969
asRNA:CR45121	chr3L	0	0.794877	0	0	0	1.00549	0	0	0.939369	2.30276	0	0	0.264959	0.335162	0.313123	0.767587	0.458922	0.580518	0.542345	1.3295	-0.240961	0.0981305	1.2936	NA	NA	NA
asRNA:CR45124	chr4	10.3896	11.1283	11.7863	15.9953	20.9139	17.0933	23.7612	10.1088	22.5449	10.7462	18.2391	10.6153	11.1014	18.0008	18.805	13.2002	0.698733	2.58181	7.5556	4.36433	-0.760372	-0.0630504	-0.510554	0.21649	0.957219	0.443033
asRNA:CR45126	chr4	884.272	1063.55	838.971	347.632	305.741	313.712	256.621	157.698	168.147	118.976	136.314	95.5374	928.93	322.362	194.155	116.942	118.761	22.2447	54.3487	20.464	2.25836	0.731469	-0.731415	1.00898e-36	0.000606386	0.000938401
asRNA:CR45129	chr2R	1.1544	0	0	0	0	0	0	0	0	0	0	0	0.384801	0	0	0	0.666495	0	0	0	#DIV/0!	#DIV/0!	#DIV/0!	NA	NA	NA
asRNA:CR45130	chr2R	0	3.17951	4.28593	8.53085	0	7.03841	8.31643	5.05442	11.2724	0.767587	8.63959	2.12305	2.48848	5.18975	8.21443	3.84341	2.22496	4.55598	3.11026	4.20854	-1.72289	-0.662494	-1.09577	0.22292	0.669839	0.417886
asRNA:CR45131	chr2R	1.1544	1.58975	5.35742	6.39814	10.9549	8.0439	10.6926	15.1632	10.3331	13.8166	9.59954	6.36916	2.70052	8.46564	12.063	9.92842	2.31121	2.30747	2.69094	3.73458	-2.15927	-0.510892	-0.280947	0.0160536	0.601238	0.780616
asRNA:CR45132	chr2R	11.544	11.1283	10.7148	9.5972	10.9549	13.0713	16.6329	12.1306	13.1512	8.44345	11.5195	5.30763	11.129	11.2078	13.9715	8.42351	0.414598	1.75082	2.36058	3.10596	-0.328162	-0.317987	-0.729997	0.639197	0.731004	0.311332
asRNA:CR45133	chr2R	4.61761	1.58975	0	0	0.995899	0	4.75224	3.03265	0.939369	2.30276	0.959954	1.06153	2.06912	0.331966	2.90809	1.44141	2.34583	0.574983	1.90949	0.747674	-0.491053	-3.13096	-1.01259	0.751815	NA	0.602335
asRNA:CR45134	chr2R	31.1689	38.1541	36.4304	28.7916	29.877	48.2634	40.3941	43.468	40.3929	49.8931	41.278	32.9073	35.2511	35.644	41.4183	41.3595	3.63887	10.9422	1.77506	8.49319	-0.232599	-0.21661	-0.00205007	0.591141	0.698418	0.986668
asRNA:CR45135	chr2R	3.46321	10.3334	9.64335	8.53085	5.9754	3.01646	8.31643	5.05442	2.81811	2.30276	2.87986	2.12305	7.81332	5.8409	5.39632	2.43523	3.78307	2.75965	2.76506	0.395412	0.53396	0.114216	-1.14792	0.532836	0.938319	0.428465
asRNA:CR45136	chr2R	0	0	0	0	0	0	0	0	0	0	0	0	0	0	0	0	0	0	0	0	#DIV/0!	#DIV/0!	#DIV/0!	NA	NA	NA
asRNA:CR45137	chr2R	0	0	0	0	0	0	0	0	0	0	0	0	0	0	0	0	0	0	0	0	#DIV/0!	#DIV/0!	#DIV/0!	NA	NA	NA
asRNA:CR45139	chr2R	0	0	0	0	0	1.00549	0	2.02177	0	0	0	0	0	0.335162	0.673922	0	0	0.580518	1.16727	0	#NUM!	-1.00772	#NUM!	NA	NA	NA
asRNA:CR45140	chr2R	10.3896	5.56414	4.28593	2.13271	3.9836	3.01646	2.37612	2.02177	0	1.53517	0.959954	0	6.74656	3.04426	1.46596	0.831709	3.21906	0.925755	1.28186	0.77558	2.2023	1.05424	-0.817698	0.0503449	0.642974	0.84017
asRNA:CR45141	chr2R	2.30881	5.56414	21.4297	6.39814	11.9508	39.214	52.2747	46.5006	29.1204	19.1897	27.8387	22.2921	9.76753	19.1876	42.6319	23.1068	10.23	17.5641	12.0522	4.38169	-2.12587	-1.15176	-0.883617	0.00492891	0.151979	0.228529
asRNA:CR45142	chr2R	0	3.17951	7.50038	3.19907	0.995899	19.1043	22.5732	22.2394	20.6661	6.14069	10.5595	11.6768	3.55996	7.76641	21.8262	9.459	3.76464	9.88047	1.01845	2.92753	-2.61613	-1.49074	-1.2063	0.00773879	0.119622	0.156396
asRNA:CR45143	chr2R	23.0881	25.4361	12.8578	50.1187	44.8155	58.3183	32.0777	36.3918	44.1504	39.1469	37.4382	50.9533	20.4606	51.0842	37.5399	42.5128	6.6881	6.80297	6.1177	7.35943	-0.875575	0.44445	0.179471	0.0302217	0.330839	0.729624
asRNA:CR45144	chr2R	0	0	3.21445	5.33178	5.9754	6.03292	11.8806	9.09795	7.51495	4.60552	1.91991	1.06153	1.07148	5.78003	9.49784	2.52899	1.85586	0.389263	2.21013	1.84884	-3.14799	-0.716522	-1.90904	0.00802089	0.493031	0.0594931
asRNA:CR45145	chr2R	1.1544	0.794877	3.21445	0	4.9795	6.03292	9.50449	15.1632	5.63622	9.21104	7.67963	6.36916	1.72124	3.67081	10.1013	7.75328	1.30559	3.22235	4.79148	1.42237	-2.55302	-1.46037	-0.381665	0.0245227	0.191445	0.724773
asRNA:CR45146	chr2R	2.30881	1.58975	3.21445	0	0	1.00549	4.75224	2.02177	1.87874	1.53517	0.959954	0	2.371	0.335162	2.88425	0.831709	0.814132	0.580518	1.61931	0.77558	-0.282699	-3.10526	-1.79405	0.850792	NA	0.356641
asRNA:CR45149	chr2R	4.61761	5.56414	11.7863	5.33178	5.9754	15.0823	10.6926	6.0653	11.2724	8.44345	7.67963	3.18458	7.32269	8.79649	9.34343	6.43589	3.89448	5.45318	2.85371	2.8415	-0.351579	-0.0870231	-0.537812	0.712209	0.95657	0.624225
asRNA:CR45151	chr2R	2.30881	3.17951	11.7863	5.33178	4.9795	11.0604	13.0687	8.08707	8.45432	6.14069	4.79977	3.18458	5.75821	7.12388	9.87002	4.70835	5.23861	3.41364	2.77619	1.48017	-0.777433	-0.47039	-1.06783	0.391882	0.699951	0.295745
asRNA:CR45152	chr2R	2.30881	0.794877	5.35742	7.46449	5.9754	8.0439	14.2567	7.07618	7.51495	9.21104	4.79977	5.30763	2.82037	7.16126	9.61596	6.43948	2.32389	1.06707	4.02501	2.41363	-1.76955	-0.425217	-0.578486	0.0679477	0.720641	0.572424
asRNA:CR45160	chr3L	2.30881	4.76926	5.35742	8.53085	6.97129	14.0768	19.009	10.1088	17.848	11.5138	9.59954	8.49222	4.14516	9.85965	15.6553	9.86852	1.61729	3.73449	4.83831	1.52864	-1.91715	-0.66704	-0.665743	0.00920847	0.409778	0.358398
asRNA:CR45161	chr3L	0	0	0	0	0	0	0	0	0	0	0	0	0	0	0	0	0	0	0	0	#DIV/0!	#DIV/0!	#DIV/0!	NA	NA	NA
asRNA:CR45162	chr3L	6.92642	3.17951	7.50038	4.26542	5.9754	6.03292	8.31643	8.08707	7.51495	11.5138	14.3993	5.30763	5.86877	5.42458	7.97282	10.4069	2.34658	1.00427	0.412771	4.64581	-0.442032	-0.555578	0.384381	0.620781	0.658378	0.646159
asRNA:CR45163	chr3L	1.1544	0.794877	2.14297	1.06636	0	1.00549	0	3.03265	0.939369	0	0	1.06153	1.36408	0.690614	1.32401	0.353842	0.698076	0.598863	1.55248	0.612873	0.0430202	-0.938958	-1.90373	NA	NA	NA
asRNA:CR45164	chr3L	16.1616	20.6668	17.1437	8.53085	9.95899	14.0768	46.3344	13.1415	15.9693	9.97863	10.5595	9.55374	17.9907	10.8556	25.1484	10.0306	2.369	2.87964	18.402	0.504889	-0.483213	-1.21203	-1.32605	0.468784	0.0919452	0.0431576
asRNA:CR45167	chr3L	0	0	0	0	0	0	0	0	0	0	0	0	0	0	0	0	0	0	0	0	#DIV/0!	#DIV/0!	#DIV/0!	NA	NA	NA
asRNA:CR45171	chr3L	66.9553	72.3338	87.8616	215.404	242.999	220.202	376.615	437.712	350.385	31.4711	47.0378	39.2765	75.7169	226.202	388.238	39.2618	10.856	14.7437	44.8089	7.78337	-2.35825	-0.77933	-3.30574	2.02273e-41	1.02319e-05	7.38573e-69
asRNA:CR45175	chr3L	23.0881	31.0002	33.216	24.5262	14.9385	18.0988	26.1373	21.2285	16.9086	17.6545	18.2391	21.2305	29.1014	19.1878	21.4248	19.0414	5.32426	4.88574	4.61748	1.91826	0.441804	-0.159095	-0.170146	0.325808	0.849837	0.799843
asRNA:CR45182	chr3L	2.30881	0	0	0	0	0	0	0	0	0	0	0	0.769602	0	0	0	1.33299	0	0	0	#DIV/0!	#DIV/0!	#DIV/0!	NA	NA	NA
asRNA:CR45185	chrX	10.3896	6.35901	13.9293	20.2608	8.96309	4.02195	10.6926	14.1524	12.2118	20.7248	20.159	11.6768	10.226	11.0819	12.3522	17.5202	3.78779	8.32417	1.73418	5.06846	-0.272534	-0.156563	0.504249	0.739171	0.895573	0.509304
asRNA:CR45189	chr3R	98.1242	73.1287	102.862	89.5739	88.635	83.4554	51.0866	65.7074	68.574	133.56	143.033	114.645	91.3718	87.2215	61.7893	130.413	15.9756	3.29507	9.37897	14.4535	0.56439	0.497325	1.07765	0.0320169	0.0995448	3.41704e-06
asRNA:CR45190	chr3R	15.0072	3.17951	13.9293	9.5972	13.9426	16.0878	10.6926	15.1632	7.51495	16.1193	22.0789	15.9229	10.7053	13.2092	11.1236	18.0404	6.53981	3.30686	3.84232	3.49887	-0.0552911	0.247921	0.697609	0.921048	0.826202	0.34328
asRNA:CR45192	chr3R	0	0	0	0	0	0	0	0	0	0	0	0	0	0	0	0	0	0	0	0	#DIV/0!	#DIV/0!	#DIV/0!	NA	NA	NA
asRNA:CR45195	chr3R	2.30881	1.58975	3.21445	1.06636	3.9836	5.02744	17.8209	8.08707	13.1512	3.83793	1.91991	3.18458	2.371	3.35913	13.0197	2.98081	0.814132	2.05305	4.86826	0.975114	-2.45713	-1.95454	-2.12692	0.00298602	0.0226144	0.00898344
asRNA:CR45198	chr4	0	0	1.07148	0	0	0	0	0	0	0	0	0	0.357161	0	0	0	0.618621	0	0	0	#DIV/0!	#DIV/0!	#DIV/0!	NA	NA	NA
asRNA:CR45202	chr2R	0	3.97438	4.28593	5.33178	0.995899	6.03292	3.56418	4.04353	5.63622	1.53517	0.959954	1.06153	2.75344	4.1202	4.41464	1.18555	2.38963	2.72834	1.08472	0.307011	-0.681063	-0.0995825	-1.89674	0.622818	0.953827	0.268907
asRNA:CR45205	chr3R	0	0	0	0	0	0	0	0	0	0	0	0	0	0	0	0	0	0	0	0	#DIV/0!	#DIV/0!	#DIV/0!	NA	NA	NA
asRNA:CR45206	chr3R	0	0	0	0	0	0	0	0	0	0	0	0	0	0	0	0	0	0	0	0	#DIV/0!	#DIV/0!	#DIV/0!	NA	NA	NA
asRNA:CR45208	chr3R	1.1544	1.58975	3.21445	6.39814	1.9918	4.02195	10.6926	8.08707	4.69685	10.7462	3.83982	0	1.9862	4.13729	7.82549	4.86201	1.08574	2.20543	3.0064	5.44554	-1.97817	-0.919493	-0.686628	0.131429	0.510975	0.606341
asRNA:CR45209	chr3R	0	0.794877	0	3.19907	0	5.02744	8.31643	10.1088	8.45432	4.60552	2.87986	1.06153	0.264959	2.74217	8.95986	2.84897	0.458922	2.54467	0.997424	1.7722	-5.07964	-1.70816	-1.65304	0.0033166	0.110814	0.096251
asRNA:CR45210	chr3L	0	0	0	0	0.995899	4.02195	4.75224	3.03265	1.87874	0	0	0	0	1.67262	3.22121	0	0	2.09463	1.446	0	#NUM!	-0.945497	#NUM!	NA	NA	0.127563
asRNA:CR45213	chr3R	1.1544	0	1.07148	2.13271	0.995899	1.00549	3.56418	3.03265	3.75748	0.767587	0.959954	0	0.741962	1.37803	3.45144	0.575847	0.643894	0.653589	0.375337	0.507889	-2.21778	-1.32459	-2.58344	0.132053	NA	0.132712
asRNA:CR45214	chr3R	0	1.58975	1.07148	2.13271	4.9795	1.00549	3.56418	3.03265	2.81811	2.30276	2.87986	1.06153	0.887079	2.7059	3.13831	2.08138	0.810761	2.04807	0.384098	0.929162	-1.82286	-0.213882	-0.592447	0.329084	0.92574	0.734568
asRNA:CR45257	chr2L	0	0	0	0	0	1.00549	0	2.02177	0	0	0	0	0	0.335162	0.673922	0	0	0.580518	1.16727	0	#NUM!	-1.00772	#NUM!	NA	NA	NA
asRNA:CR45260	chr2L	0	0	0	0	0	0	0	0	0	0	0	0	0	0	0	0	0	0	0	0	#DIV/0!	#DIV/0!	#DIV/0!	NA	NA	NA
asRNA:CR45264	chr2R	5.77201	7.15389	6.4289	7.46449	6.97129	10.0549	19.009	12.1306	15.0299	9.97863	4.79977	7.43069	6.4516	8.16355	15.3898	7.40303	0.691219	1.65639	3.45329	2.58954	-1.25425	-0.914708	-1.05579	0.0571568	0.225676	0.125726
asRNA:CR45268	chr2R	0	0	0	0	0	0	1.18806	0	0	0	0	0	0	0	0.39602	0	0	0	0.685927	0	#NUM!	#NUM!	#NUM!	NA	NA	NA
asRNA:CR45271	chr2R	0	0	0	0	0	0	0	0	0	0	0	0	0	0	0	0	0	0	0	0	#DIV/0!	#DIV/0!	#DIV/0!	NA	NA	NA
asRNA:CR45272	chr2R	0	0	0	0	0	0	0	0	0	0	0	0	0	0	0	0	0	0	0	0	#DIV/0!	#DIV/0!	#DIV/0!	NA	NA	NA
asRNA:CR45275	chr2R	2.30881	4.76926	1.07148	8.53085	0.995899	8.0439	8.31643	11.1197	4.69685	3.83793	4.79977	5.30763	2.71652	5.85688	8.04433	4.64845	1.8823	4.21677	3.22007	0.746445	-1.56621	-0.45784	-0.791224	0.168425	0.725918	0.467834
asRNA:CR45281	chr2R	5.77201	1.58975	1.07148	4.26542	5.9754	3.01646	5.94031	8.08707	9.39369	0.767587	0.959954	0	2.81108	4.41909	7.80702	0.575847	2.5773	1.48544	1.74364	0.507889	-1.47365	-0.821022	-3.76101	0.105875	0.438646	0.0101235
asRNA:CR45300	chr2L	0	0	0	1.06636	0.995899	0	0	0	0.939369	0	0	0	0	0.687418	0.313123	0	0	0.596363	0.542345	0	#NUM!	1.13446	#NUM!	NA	NA	NA
asRNA:CR45305	chr2L	2.30881	3.17951	0	2.13271	0	5.02744	13.0687	3.03265	4.69685	3.07035	0.959954	3.18458	1.82944	2.38672	6.93272	2.40496	1.64306	2.52332	5.37864	1.25271	-1.92202	-1.5384	-1.52741	0.140444	0.285695	0.2369
asRNA:CR45326	chr2R	0	0.794877	1.07148	1.06636	1.9918	0	5.94031	2.02177	1.87874	2.30276	0.959954	0	0.62212	1.01938	3.28027	1.08757	0.55624	0.99673	2.30477	1.15667	-2.39855	-1.68612	-1.5927	0.19167	NA	0.359236
asRNA:CR45330	chr2L	0	0	0	0	0	0	0	0	0.939369	0	0	0	0	0	0.313123	0	0	0	0.542345	0	#NUM!	#NUM!	#NUM!	NA	NA	NA
asRNA:CR45341	chr2L	0	0.794877	0	0	0	0	0	0	0	0	0	0	0.264959	0	0	0	0.458922	0	0	0	#DIV/0!	#DIV/0!	#DIV/0!	NA	NA	NA
asRNA:CR45342	chr2L	0	0	0	0	0	0	0	0	0	0	0	0	0	0	0	0	0	0	0	0	#DIV/0!	#DIV/0!	#DIV/0!	NA	NA	NA
asRNA:CR45343	chr2L	0	0	0	0	0	0	0	0	0	0	0	0	0	0	0	0	0	0	0	0	#DIV/0!	#DIV/0!	#DIV/0!	NA	NA	NA
asRNA:CR45350	chr2R	6.92642	10.3334	23.5726	14.929	19.918	26.1427	48.7105	45.4897	45.0897	26.8655	21.119	21.2305	13.6108	20.3299	46.43	23.0717	8.79376	5.61818	1.98509	3.28604	-1.7703	-1.19146	-1.00893	6.69615e-05	0.0119982	0.0236428
asRNA:CR45366	chr2L	1.1544	10.3334	7.50038	12.7963	13.9426	10.0549	5.94031	3.03265	11.2724	4.60552	4.79977	1.06153	6.32939	12.2646	6.74846	3.48894	4.7002	1.99765	4.17892	2.10444	-0.0924913	0.861867	-0.95177	0.958055	0.410843	0.490919
asRNA:CR45367	chr2L	1.1544	0	1.07148	1.06636	0	1.00549	8.31643	2.02177	0.939369	1.53517	0	3.18458	0.741962	0.690614	3.75919	1.57325	0.643894	0.598863	3.98362	1.59263	-2.341	-2.44447	-1.25667	0.183043	NA	0.424062
asRNA:CR45371	chr2L	2.30881	3.17951	3.21445	5.33178	0.995899	4.02195	7.12837	3.03265	7.51495	3.83793	6.71968	8.49222	2.90092	3.44988	5.89199	6.34994	0.513085	2.22383	2.48379	2.34907	-1.02224	-0.772211	0.107989	0.384308	0.589549	0.938196
asRNA:CR45376	chr2R	1.1544	0	4.28593	3.19907	0.995899	3.01646	2.37612	2.02177	0.939369	0.767587	0	3.18458	1.81344	2.40381	1.77909	1.31739	2.21767	1.2227	0.748489	1.66196	0.0275967	0.434186	-0.433455	0.998863	NA	0.872096
asRNA:CR45384	chr3L	0	0	0	0	0	0	0	0	1.87874	0.767587	0.959954	0	0	0	0.626246	0.575847	0	0	1.08469	0.507889	#NUM!	#NUM!	-0.121044	NA	NA	NA
asRNA:CR45396	chr3L	2.30881	5.56414	15.0008	12.7963	18.9221	33.1811	51.0866	36.3918	43.211	20.7248	19.1991	22.2921	7.62457	21.6331	43.5631	20.7387	6.59208	10.4593	7.35375	1.54654	-2.51438	-1.00986	-1.07078	5.07843e-06	0.0697674	0.0355347
asRNA:CR45397	chr3L	0	3.17951	0	1.06636	1.9918	2.01097	4.75224	3.03265	4.69685	2.30276	2.87986	2.12305	1.05984	1.68971	4.16058	2.43523	1.83569	0.539925	0.977209	0.395412	-1.97294	-1.30001	-0.772729	0.214342	0.432077	0.575191
asRNA:CR45445	chr3L	0	2.38463	2.14297	3.19907	6.97129	6.03292	7.12837	5.05442	4.69685	4.60552	4.79977	6.36916	1.5092	5.4011	5.62654	5.25815	1.31258	1.96388	1.31285	0.967053	-1.89847	-0.0589969	-0.0976933	0.164128	0.984439	0.9483
asRNA:CR45466	chrX	96.9698	135.129	75.0038	87.4412	70.7088	65.3567	100.985	80.8707	74.2102	19.1897	17.2792	27.5997	102.368	74.5022	85.3553	21.3562	30.4239	11.5206	13.9395	5.49078	0.262205	-0.196198	-1.99883	0.406099	0.684104	1.52658e-09
asRNA:CR45467	chr2R	21.9336	32.59	35.3589	47.986	41.8278	29.1591	51.0866	54.5877	37.5748	23.0276	18.2391	38.215	29.9608	39.6576	47.7497	26.4939	7.08828	9.59922	8.98394	10.4293	-0.672413	-0.267893	-0.849831	0.114005	0.649687	0.0460375
asRNA:CR45468	chr2R	0	0	0	0	0	0	0	0	0	0	0	0	0	0	0	0	0	0	0	0	#DIV/0!	#DIV/0!	#DIV/0!	NA	NA	NA
asRNA:CR45469	chr2R	0	0	0	0	0	0	0	0	0	0	0	0	0	0	0	0	0	0	0	0	#DIV/0!	#DIV/0!	#DIV/0!	NA	NA	NA
asRNA:CR45479	chrX	20.7792	15.1027	30.0015	26.6589	23.9016	19.1043	21.3851	22.2394	30.9992	17.6545	26.8787	25.4766	21.9611	23.2216	24.8746	23.3366	7.51942	3.82295	5.32124	4.97055	-0.179719	-0.0992057	-0.0920762	0.717657	0.895856	0.872004
asRNA:CR45481	chrX	175.469	141.488	163.937	172.75	192.209	170.933	118.806	160.73	129.633	538.078	404.141	605.07	160.298	178.63	136.39	515.763	17.2803	11.7941	21.7636	102.307	0.233021	0.389241	1.91897	0.344927	0.126851	1.96775e-26
asRNA:CR45485	chrX	101.587	111.283	95.362	175.949	118.512	132.724	232.86	181.959	217.934	21.4924	30.7185	27.5997	102.744	142.395	210.918	26.6036	8.02316	29.9146	26.1658	4.69303	-1.03762	-0.566781	-2.98699	1.39618e-06	0.019598	1.26728e-36
asRNA:CR45501	chrX	24.2425	27.0258	8.57186	13.8626	18.9221	17.0933	17.8209	12.1306	15.9693	19.9573	11.5195	20.169	19.9467	16.626	15.3069	17.2152	9.94872	2.56189	2.90241	4.93383	0.381966	0.119256	0.169501	0.536583	0.909476	0.838971
asRNA:CR45518	chrX	0	1.58975	1.07148	0	0	0	1.18806	0	0	2.30276	0	0	0.887079	0	0.39602	0.767587	0.810761	0	0.685927	1.3295	1.16349	#NUM!	0.954755	NA	NA	NA
asRNA:CR45520	chrX	0	0.794877	3.21445	2.13271	5.9754	3.01646	10.6926	4.04353	9.39369	3.07035	1.91991	5.30763	1.33644	3.70819	8.04326	3.43263	1.67426	2.01257	3.52422	1.72268	-2.58938	-1.11707	-1.22847	0.0307692	0.327318	0.224456
asRNA:CR45525	chrX	41.5585	26.2309	35.3589	14.929	26.8893	25.1372	16.6329	28.3047	26.3023	14.5841	12.4794	12.7383	34.3828	22.3185	23.7466	13.2673	7.71026	6.45918	6.24154	1.14775	0.533963	-0.0894847	-0.83985	0.266979	0.911886	0.119319
asRNA:CR45528	chrX	8.08082	3.17951	2.14297	6.39814	6.97129	6.03292	10.6926	10.1088	4.69685	2.30276	3.83982	3.18458	4.46776	6.46745	8.49941	3.10905	3.17163	0.47301	3.30602	0.771307	-0.92781	-0.394165	-1.45089	0.29759	0.748564	0.152187
asRNA:CR45535	chrX	0	0	0	0	0	0	0	0	0	0	0	0	0	0	0	0	0	0	0	0	#DIV/0!	#DIV/0!	#DIV/0!	NA	NA	NA
asRNA:CR45538	chrX	0	0	0	0	0	0	1.18806	1.01088	0	0.767587	0	1.06153	0	0	0.732981	0.609705	0	0	0.640932	0.548092	#NUM!	#NUM!	-0.265667	NA	NA	NA
asRNA:CR45549	chr3R	1.1544	6.35901	5.35742	3.19907	0.995899	5.02744	5.94031	3.03265	0.939369	3.07035	2.87986	5.30763	4.29028	3.07413	3.30411	3.75261	2.76154	2.01867	2.5115	1.35005	0.37681	-0.104081	0.183635	0.746266	0.980215	0.914293
asRNA:CR45600	chr3R	250.505	250.386	270.014	354.03	297.774	293.602	414.633	302.254	334.415	359.998	342.704	346.058	256.968	315.135	350.434	349.587	11.2977	33.7483	57.8768	9.17133	-0.447553	-0.153172	-0.00349443	0.00419754	0.489485	0.997761
asRNA:CR45601	chrX	62.3377	124.001	370.733	315.641	291.798	934.098	1075.2	578.225	648.165	229.508	143.033	230.351	185.691	513.846	767.195	200.964	163.191	364.144	269.019	50.1716	-2.04669	-0.578258	-1.93265	0.00837853	0.52907	0.0149248
asRNA:CR45604	chrX	1.1544	3.17951	9.64335	8.53085	7.96719	11.0604	29.7015	32.3483	15.0299	5.37311	6.71968	4.24611	4.65909	9.18613	25.6932	5.4463	4.43367	1.64741	9.32905	1.23841	-2.46327	-1.48386	-2.23804	0.000167285	0.0225272	0.000529072
asRNA:CR45611	chrX	1.1544	2.38463	5.35742	0	3.9836	0	0	0	0	0	1.91991	1.06153	2.96548	1.32787	0	0.993812	2.16087	2.29993	0	0.961744	#DIV/0!	#DIV/0!	#DIV/0!	0.171585	NA	0.716227
asRNA:CR45612	chrX	1.1544	0.794877	1.07148	5.33178	3.9836	9.04939	4.75224	5.05442	1.87874	0	0	2.12305	1.00692	6.12159	3.89513	0.707685	0.188258	2.62362	1.75277	1.22575	-1.95172	0.652233	-2.46049	0.255292	0.577009	0.211359
asRNA:CR45620	chrX	2.30881	2.38463	2.14297	9.5972	4.9795	4.02195	5.94031	5.05442	5.63622	0.767587	3.83982	0	2.2788	6.19955	5.54365	1.5358	0.123595	2.98115	0.450141	2.03191	-1.28256	0.161328	-1.85184	0.290082	0.916831	0.186839
asRNA:CR45621	chrX	0	0	0	0	0	0	1.18806	1.01088	0	0	0	0	0	0	0.732981	0	0	0	0.640932	0	#NUM!	#NUM!	#NUM!	NA	NA	NA
asRNA:CR45623	chrX	3.46321	2.38463	7.50038	2.13271	0.995899	1.00549	2.37612	0	0	2.30276	0.959954	2.12305	4.44941	1.37803	0.792041	1.79526	2.6967	0.653589	1.37185	0.728951	2.48997	0.798963	1.18054	0.101472	0.852365	0.690833
asRNA:CR45629	chrX	1.1544	0	1.07148	2.13271	1.9918	0	0	0	0.939369	0	0.959954	0	0.741962	1.37484	0.313123	0.319985	0.643894	1.19273	0.542345	0.55423	1.24462	2.13446	0.0312733	NA	NA	NA
asRNA:CR45648	chr3R	0	0.794877	0	0	0	0	1.18806	0	0.939369	0	0	0	0.264959	0	0.709143	0	0.458922	0	0.626598	0	-1.42031	#NUM!	#NUM!	NA	NA	NA
asRNA:CR45663	chr3L	0	0	0	0	0	0	0	0	0	0	0	0	0	0	0	0	0	0	0	0	#DIV/0!	#DIV/0!	#DIV/0!	NA	NA	NA
asRNA:CR45682	chr3L	23.0881	22.2566	20.3582	22.3935	12.9467	15.0823	14.2567	22.2394	32.8779	31.4711	14.3993	18.046	21.9009	16.8075	23.1247	21.3054	1.39925	4.95405	9.34211	8.99051	-0.0784425	-0.46033	-0.118213	0.891568	0.525181	0.883346
asRNA:CR45683	chr2L	1.1544	0.794877	1.07148	8.53085	4.9795	10.0549	2.37612	2.02177	3.75748	2.30276	2.87986	5.30763	1.00692	7.85507	2.71846	3.49675	0.188258	2.6043	0.917097	1.59459	-1.43284	1.53084	0.363229	0.497957	0.145296	0.858735
asRNA:CR45686	chr3L	0	0.794877	4.28593	0	0	2.01097	5.94031	2.02177	0.939369	3.07035	0	2.12305	1.6936	0.670325	2.96715	1.73113	2.27993	1.16104	2.63109	1.57225	-0.808981	-2.14614	-0.77736	0.668154	NA	0.726618
asRNA:CR45701	chr2L	0	0	0	0	0	0	0	0	0	0	0	0	0	0	0	0	0	0	0	0	#DIV/0!	#DIV/0!	#DIV/0!	NA	NA	NA
asRNA:CR45712	chr2L	0	0	0	1.06636	0	0	0	1.01088	0.939369	0.767587	0	0	0	0.355452	0.650084	0.255862	0	0.615661	0.564124	0.443166	#NUM!	-0.870972	-1.34526	NA	NA	NA
asRNA:CR45713	chr2L	0	0	1.07148	0	0.995899	3.01646	0	2.02177	0.939369	0.767587	0.959954	0	0.357161	1.33745	0.987045	0.575847	0.618621	1.53696	1.01173	0.507889	-1.46654	0.438301	-0.777431	NA	NA	NA
asRNA:CR45714	chrX	25.3969	19.8719	20.3582	24.5262	26.8893	17.0933	11.8806	21.2285	20.6661	119.744	119.994	101.907	21.8757	22.8362	17.9251	113.881	3.05913	5.11198	5.24222	10.3713	0.287345	0.349345	2.66748	0.624306	0.604085	1.45051e-18
asRNA:CR45715	chr2L	46.1761	46.8977	51.4312	40.5215	31.8688	32.1756	45.1463	42.4571	33.8173	38.3793	43.1979	37.1534	48.1683	34.8553	40.4736	39.5769	2.84865	4.90949	5.91925	3.19525	0.251105	-0.215602	-0.0323214	0.470708	0.676346	0.960302
asRNA:CR45738	chr3L	0	0	1.07148	0	0	0	2.37612	0	0	0.767587	0	2.12305	0.357161	0	0.792041	0.963547	0.618621	0	1.37185	1.07501	-1.149	#NUM!	0.28278	NA	NA	NA
asRNA:CR45778	chr2L	48.4849	96.1801	107.148	65.0477	94.6104	99.5432	204.347	135.458	166.268	84.4345	100.795	81.7376	83.9378	86.4005	168.691	88.9891	31.189	18.6558	34.5079	10.3129	-1.00699	-0.965273	-0.922683	0.000795839	0.00294436	0.00247215
asRNA:CR45789	chr2L	6.92642	3.17951	5.35742	4.26542	7.96719	9.04939	5.94031	7.07618	2.81811	4.60552	5.75973	1.06153	5.15445	7.094	5.2782	3.80892	1.88168	2.50867	2.2049	2.4483	-0.0342283	0.426554	-0.470662	0.96729	0.739493	0.756233
asRNA:CR45797	chrX	0	0	0	0	0	1.00549	0	0	2.81811	0	0.959954	0	0	0.335162	0.939369	0.319985	0	0.580518	1.62704	0.55423	#NUM!	-1.48683	-1.55369	NA	NA	NA
asRNA:CR45798	chr3R	2.30881	15.8975	18.2152	22.3935	26.8893	33.1811	72.4717	36.3918	48.8472	15.3517	12.4794	16.9844	12.1405	27.4879	52.5702	14.9385	8.59301	5.41866	18.3258	2.28076	-2.11442	-0.935447	-1.81521	3.08715e-05	0.0829223	0.000240516
asRNA:CR45800	chr3R	0	3.17951	4.28593	3.19907	0.995899	4.02195	9.50449	9.09795	7.51495	3.83793	3.83982	3.18458	2.48848	2.73897	8.7058	3.62078	2.22496	1.56461	1.05114	0.377758	-1.80671	-1.66834	-1.26568	0.0608839	0.11925	0.178092
asRNA:CR45801	chr3L	1.1544	2.38463	1.07148	2.13271	0	2.01097	3.56418	1.01088	3.75748	1.53517	1.91991	0	1.53684	1.38123	2.77751	1.15169	0.735379	1.19773	1.533	1.01578	-0.853829	-1.00784	-1.27004	0.610817	NA	0.508981
asRNA:CR45802	chr3L	0	0	0	0	0	0	0	0	0	0	0	0	0	0	0	0	0	0	0	0	#DIV/0!	#DIV/0!	#DIV/0!	NA	NA	NA
asRNA:CR45804	chr3L	1.1544	1.58975	0	2.13271	5.9754	3.01646	4.75224	7.07618	2.81811	5.37311	4.79977	5.30763	0.914719	3.70819	4.88218	5.16017	0.821532	2.01257	2.13201	0.313827	-2.41612	-0.39681	0.0798938	0.137115	0.810795	0.939545
asRNA:CR45806	chr3L	0	0	5.35742	3.19907	0	2.01097	5.94031	2.02177	6.57558	2.30276	3.83982	4.24611	1.78581	1.73668	4.84589	3.46289	3.09311	1.61708	2.4663	1.02504	-1.44019	-1.48043	-0.484782	0.347413	0.443347	0.754326
asRNA:CR45807	chr3L	3.46321	2.38463	6.4289	2.13271	3.9836	3.01646	5.94031	6.0653	6.57558	2.30276	5.75973	2.12305	4.09225	3.04426	6.19373	3.39518	2.09423	0.925755	0.336549	2.04973	-0.597916	-1.02472	-0.867321	0.538895	0.431419	0.433267
asRNA:CR45812	chr3L	0	0.794877	0	0	0.995899	6.03292	2.37612	0	7.51495	0	0	0	0.264959	2.34294	3.29703	0	0.458922	3.23418	3.84118	0	-3.63732	-0.492844	#NUM!	0.251187	NA	0.228466
asRNA:CR45813	chr3L	4.61761	3.97438	4.28593	1.06636	1.9918	3.01646	3.56418	3.03265	0.939369	3.07035	3.83982	5.30763	4.29264	2.02487	2.51207	4.0726	0.321665	0.975474	1.38768	1.13666	0.772991	-0.311045	0.697075	0.52766	0.920791	0.622975
asRNA:CR45814	chr3L	1.1544	0.794877	0	1.06636	0	4.02195	3.56418	5.05442	5.63622	0.767587	1.91991	4.24611	0.64976	1.6961	4.75161	2.3112	0.590725	2.08362	1.06869	1.77196	-2.87044	-1.48619	-1.03977	0.0850823	0.330691	0.400508
asRNA:CR45815	chr3L	1.1544	0	0	2.13271	0	0	0	1.01088	0.939369	0.767587	0.959954	0	0.384801	0.710904	0.650084	0.575847	0.666495	1.23132	0.564124	0.507889	-0.756515	0.129028	-0.174941	NA	NA	NA
asRNA:CR45818	chr3L	1.1544	3.17951	13.9293	2.13271	8.96309	7.03841	19.009	16.1741	22.5449	6.90828	8.63959	6.36916	6.08773	6.04474	19.2427	7.30568	6.86605	3.52194	3.19179	1.18623	-1.66033	-1.67056	-1.39722	0.0251624	0.0483094	0.0653352
asRNA:CR45822	chr3L	234.344	240.848	233.583	497.988	424.253	486.656	373.051	265.862	332.537	1.53517	4.79977	5.30763	236.258	469.632	323.817	3.88086	3.99272	39.706	54.1239	2.04723	-0.454813	0.536354	-6.38266	0.00837853	0.00215445	9.71525e-104
asRNA:CR45827	chr3L	1.1544	1.58975	0	0	0.995899	1.00549	0	0	0	0.767587	0.959954	0	0.914719	0.667129	0	0.575847	0.821532	0.57777	0	0.507889	#DIV/0!	#DIV/0!	#DIV/0!	NA	NA	NA
asRNA:CR45828	chr3L	1.1544	2.38463	2.14297	2.13271	2.9877	1.00549	2.37612	6.0653	4.69685	1.53517	0	2.12305	1.894	2.04197	4.37942	1.21941	0.651808	0.994216	1.86496	1.09618	-1.2093	-1.10078	-1.84456	0.323047	0.451083	0.198572
asRNA:CR45829	chr3L	0	0.794877	1.07148	0	0.995899	0	1.18806	3.03265	0.939369	0	0	0	0.62212	0.331966	1.72003	0	0.55624	0.574983	1.14355	0	-1.46717	-2.37332	#NUM!	NA	NA	NA
asRNA:CR45830	chr3L	0	0	0	0	0	0	0	0	0	0	0	0	0	0	0	0	0	0	0	0	#DIV/0!	#DIV/0!	#DIV/0!	NA	NA	NA
asRNA:CR45831	chr3L	13.8528	10.3334	17.1437	10.6636	10.9549	13.0713	22.5732	19.2068	14.0905	6.90828	9.59954	8.49222	13.7767	11.5633	18.6235	8.33335	3.4058	1.31413	4.27129	1.35265	-0.434898	-0.687575	-1.16016	0.453999	0.330407	0.0555139
asRNA:CR45832	chr3L	0	0	0	0	0	0	0	0	0	0	0	0	0	0	0	0	0	0	0	0	#DIV/0!	#DIV/0!	#DIV/0!	NA	NA	NA
asRNA:CR45834	chr3L	0	0	0	0	0	0	0	0	0.939369	0	0	0	0	0	0.313123	0	0	0	0.542345	0	#NUM!	#NUM!	#NUM!	NA	NA	NA
asRNA:CR45835	chr3L	58.8745	70.744	69.6464	118.366	111.541	155.851	186.526	131.415	151.238	17.6545	28.7986	16.9844	66.4217	128.586	156.393	21.1459	6.559	23.8574	27.9146	6.63596	-1.23545	-0.282447	-2.88673	7.08406e-07	0.404382	2.1933e-26
asRNA:CR45865	chr3L	21.9336	24.6412	30.0015	20.2608	13.9426	13.0713	13.0687	21.2285	14.0905	27.6331	25.9188	29.7228	25.5255	15.7582	16.1293	27.7582	4.10599	3.92357	4.44558	1.90508	0.662257	-0.0335743	0.783235	0.17469	0.966466	0.110845
asRNA:CR45867	chr3L	1.1544	1.58975	4.28593	1.06636	0.995899	7.03841	4.75224	6.0653	10.3331	3.07035	3.83982	3.18458	2.34336	3.03356	7.0502	3.36491	1.69634	3.46849	2.91786	0.415225	-1.58908	-1.21666	-1.06709	0.147481	0.33216	0.329266
asRNA:CR45868	chr3L	5.77201	3.97438	9.64335	5.33178	4.9795	4.02195	1.18806	4.04353	6.57558	4.60552	2.87986	2.12305	6.46325	4.77774	3.93573	3.20281	2.89701	0.677822	2.69538	1.27235	0.71563	0.279699	-0.297291	0.52904	0.895276	0.852506
asRNA:CR45869	chr3L	1.1544	0.794877	1.07148	3.19907	1.9918	4.02195	4.75224	4.04353	3.75748	2.30276	0.959954	1.06153	1.00692	3.07094	4.18442	1.44141	0.188258	1.02112	0.51213	0.747674	-2.05508	-0.446348	-1.53754	0.14937	0.768109	0.275173
asRNA:CR45870	chr3L	2.30881	7.15389	3.21445	11.7299	6.97129	13.0713	5.94031	8.08707	9.39369	6.90828	5.75973	3.18458	4.22572	10.5908	7.80702	5.2842	2.57599	3.20558	1.74364	1.90685	-0.885577	0.439974	-0.563088	0.389194	0.683691	0.600806
asRNA:CR45871	chr3L	5.77201	11.1283	18.2152	9.5972	11.9508	16.0878	54.6508	48.5224	32.8779	10.7462	17.2792	21.2305	11.7052	12.5453	45.3504	16.4186	6.24163	3.28588	11.2277	5.29487	-1.95397	-1.85397	-1.46578	4.63295e-05	0.000253638	0.00158511
asRNA:CR45872	chr3L	0	0	0	0	0	0	0	0	0	0	0	0	0	0	0	0	0	0	0	0	#DIV/0!	#DIV/0!	#DIV/0!	NA	NA	NA
asRNA:CR45873	chr3L	51.9481	67.5645	46.0738	1.06636	0	2.01097	14.2567	15.1632	6.57558	42.9848	36.4783	30.7843	55.1955	1.02578	11.9985	36.7491	11.1073	1.0061	4.71822	6.10479	2.20169	-3.54807	1.61485	8.39232e-08	0.0094827	0.000357148
asRNA:CR45874	chr3L	28.8601	31.0002	38.5734	59.7159	44.8155	117.642	242.364	124.339	115.542	38.3793	41.278	26.5382	32.8112	74.0578	160.749	35.3985	5.10363	38.4733	70.8182	7.80896	-2.29254	-1.11808	-2.18304	6.60534e-09	0.00811657	2.85319e-08
asRNA:CR45875	chr3L	0	0.794877	3.21445	0	0	5.02744	9.50449	9.09795	4.69685	3.83793	0	2.12305	1.33644	1.67581	7.76643	1.987	1.67426	2.90259	2.6661	1.92258	-2.53885	-2.21239	-1.96666	0.0714678	0.150393	0.145371
asRNA:CR45882	chr3L	0	0	0	0	0	0	0	1.01088	0	0	0	0	0	0	0.336961	0	0	0	0.583634	0	#NUM!	#NUM!	#NUM!	NA	NA	NA
asRNA:CR45885	chr3L	1.1544	0.794877	2.14297	6.39814	3.9836	8.0439	16.6329	10.1088	8.45432	2.30276	3.83982	5.30763	1.36408	6.14188	11.732	3.81674	0.698076	2.04224	4.32413	1.50257	-3.10445	-0.933698	-1.62004	0.0019299	0.28573	0.0445752
asRNA:CR45886	chr3L	0	0	0	0	0	0	0	0	0	0	0	0	0	0	0	0	0	0	0	0	#DIV/0!	#DIV/0!	#DIV/0!	NA	NA	NA
asRNA:CR45889	chr3L	0	0	0	2.13271	0	0	1.18806	1.01088	1.87874	0.767587	0	0	0	0.710904	1.35923	0.255862	0	1.23132	0.458548	0.443166	#NUM!	-0.935061	-2.40935	NA	NA	NA
asRNA:CR45890	chr3L	0	0	0	0	0	0	0	0	0	0	0	0	0	0	0	0	0	0	0	0	#DIV/0!	#DIV/0!	#DIV/0!	NA	NA	NA
asRNA:CR45891	chr3R	9.23522	20.6668	11.7863	14.929	20.9139	15.0823	17.8209	16.1741	11.2724	9.21104	12.4794	7.43069	13.8961	16.9751	15.0892	9.70704	6.00072	3.41198	3.4064	2.56064	-0.118831	0.169904	-0.636409	0.920359	0.847905	0.389409
asRNA:CR45892	chr3L	10.3896	3.17951	5.35742	5.33178	4.9795	9.04939	9.50449	11.1197	10.3331	4.60552	6.71968	5.30763	6.30885	6.45355	10.3191	5.54428	3.69802	2.25495	0.807703	1.07676	-0.709867	-0.67715	-0.896244	0.346574	0.498696	0.294266
asRNA:CR45894	chr3L	4.61761	6.35901	6.4289	8.53085	4.9795	10.0549	8.31643	6.0653	12.2118	9.21104	4.79977	9.55374	5.80184	7.85507	8.86451	7.85485	1.02617	2.6043	3.10969	2.65132	-0.61153	-0.174416	-0.174457	0.490557	0.887537	0.870065
asRNA:CR45895	chr3L	9.23522	11.9232	12.8578	5.33178	4.9795	9.04939	10.6926	8.08707	4.69685	9.97863	13.4394	6.36916	11.3387	6.45355	7.82549	9.92905	1.88067	2.25495	3.0064	3.53536	0.535006	-0.278087	0.343475	0.468784	0.853232	0.694761
asRNA:CR45896	chr3L	5.77201	2.38463	7.50038	3.19907	8.96309	9.04939	20.197	18.1959	15.9693	1.53517	7.67963	1.06153	5.21901	7.07052	18.1207	3.42544	2.60232	3.35305	2.11488	3.69184	-1.79579	-1.35775	-2.40328	0.0123798	0.0861879	0.00297951
asRNA:CR45907	chr3R	27.7057	21.4617	22.5011	14.929	8.96309	13.0713	16.6329	11.1197	15.9693	24.5628	30.7185	27.5997	23.8895	12.3211	14.574	27.627	3.34552	3.05288	3.0098	3.07797	0.712984	-0.242257	0.922687	0.15319	0.78503	0.0556577
asRNA:CR45908	chr3R	10.3896	6.35901	3.21445	2.13271	2.9877	2.01097	11.8806	5.05442	9.39369	3.83793	4.79977	3.18458	6.65436	2.37713	8.77624	3.94076	3.59669	0.532261	3.45473	0.81249	-0.399303	-1.88438	-1.15513	0.64788	0.101201	0.228658
asRNA:CR45909	chr3R	1.1544	0	0	0	0	0	1.18806	0	0	0	0	0	0.384801	0	0.39602	0	0.666495	0	0.685927	0	-0.0414628	#NUM!	#NUM!	NA	NA	NA
asRNA:CR45912	chr3L	0	0	0	1.06636	0	4.02195	0	0	0	1.53517	0	0	0	1.6961	0	0.511724	0	2.08362	0	0.886333	#DIV/0!	#DIV/0!	#DIV/0!	NA	NA	NA
asRNA:CR45924	chr2R	34.6321	20.6668	30.0015	28.7916	19.918	22.1207	27.3254	19.2068	21.6055	12.2814	17.2792	7.43069	28.4335	23.6101	22.7126	12.3304	7.11346	4.6205	4.171	4.92443	0.3241	0.055914	-0.881269	0.541954	0.946211	0.124848
asRNA:CR45925	chr2R	8.08082	3.17951	7.50038	5.33178	8.96309	7.03841	16.6329	8.08707	10.3331	6.90828	7.67963	13.7999	6.25357	7.11109	11.6843	9.46259	2.67799	1.81675	4.43025	3.77593	-0.901823	-0.716431	-0.304268	0.246663	0.47796	0.739936
asRNA:CR45926	chr2R	19.6248	35.7695	94.2905	75.7113	83.6555	156.856	412.257	233.514	176.601	64.4773	108.475	65.8147	49.8949	105.408	274.124	79.5889	39.286	44.7323	122.965	25.0249	-2.45786	-1.37885	-1.78419	0.000116828	0.0377159	0.00391075
asRNA:CR45927	chr2R	0	0.794877	0	0	0	0	2.37612	2.02177	1.87874	2.30276	1.91991	2.12305	0.264959	0	2.09221	2.11524	0.458922	0	0.256065	0.191545	-2.98119	#NUM!	0.0157948	NA	NA	0.975623
asRNA:CR45928	chr2R	10.3896	11.9232	2.14297	5.33178	3.9836	10.0549	8.31643	9.09795	13.1512	4.60552	6.71968	5.30763	8.15191	6.45675	10.1885	5.54428	5.26009	3.18814	2.59532	1.07676	-0.321733	-0.658064	-0.877872	0.731435	0.551628	0.350785
asRNA:CR45929	chrX	1.1544	3.17951	2.14297	1.06636	2.9877	1.00549	2.37612	3.03265	3.75748	2.30276	1.91991	0	2.15896	1.68651	3.05542	1.40756	1.01265	1.12727	0.690959	1.23392	-0.501033	-0.857325	-1.11818	0.745341	NA	0.52809
asRNA:CR45943	chr3L	6.92642	13.5129	7.50038	14.929	10.9549	19.1043	13.0687	7.07618	6.57558	4.60552	18.2391	4.24611	9.31323	14.996	8.90681	9.03025	3.64833	4.0751	3.61296	7.97715	0.0643729	0.751601	0.019857	0.926322	0.435306	0.987707
asRNA:CR45944	chr3L	0	0.794877	0	0	0	1.00549	0	2.02177	0	0.767587	0	0	0.264959	0.335162	0.673922	0.255862	0.458922	0.580518	1.16727	0.443166	-1.34681	-1.00772	-1.39721	NA	NA	NA
asRNA:CR45951	chr3L	2.30881	0	0	2.13271	0	1.00549	1.18806	1.01088	0.939369	0.767587	0	0	0.769602	1.04607	1.0461	0.255862	1.33299	1.06693	0.128033	0.443166	-0.442843	-5.27322e-05	-2.03159	NA	NA	NA
asRNA:CR45952	chr3L	0	1.58975	5.35742	0	3.9836	5.02744	7.12837	7.07618	4.69685	0	2.87986	1.06153	2.31572	3.00368	6.30047	1.3138	2.7515	2.6531	1.38902	1.45641	-1.444	-1.06873	-2.26172	0.26217	0.484358	0.150656
asRNA:CR45955	chr3L	0	0.794877	2.14297	0	0	0	0	0	0.939369	0	0	0	0.979281	0	0.313123	0	1.08332	0	0.542345	0	1.64499	#NUM!	#NUM!	NA	NA	NA
asRNA:CR45960	chr3L	8.08082	1.58975	3.21445	3.19907	0	6.03292	2.37612	2.02177	0	0.767587	0.959954	0	4.29501	3.07733	1.46596	0.575847	3.37775	3.0183	1.28186	0.507889	1.55081	1.06983	-1.34809	0.330009	0.662698	0.77714
asRNA:CR45968	chr3L	1.1544	1.58975	2.14297	0	1.9918	3.01646	8.31643	3.03265	3.75748	1.53517	0	2.12305	1.62904	1.66942	5.03552	1.21941	0.495451	1.53385	2.86437	1.09618	-1.62812	-1.59279	-2.04596	0.192622	0.285003	0.150454
asRNA:CR45969	chr3L	27.7057	16.6924	13.9293	18.128	20.9139	16.0878	5.94031	6.0653	15.0299	9.97863	13.4394	13.7999	19.4425	18.3766	9.01184	12.4059	7.28829	2.42262	5.21218	2.10983	1.10932	1.02797	0.461138	0.085372	0.175844	0.636354
asRNA:CR45970	chr3L	2.30881	5.56414	1.07148	3.19907	2.9877	5.02744	8.31643	10.1088	4.69685	5.37311	6.71968	3.18458	2.98148	3.73807	7.70737	5.09246	2.32064	1.12162	2.75692	1.78418	-1.37021	-1.04395	-0.597877	0.192356	0.380868	0.577703
asRNA:CR45974	chr3L	0	0	0	0	0	0	0	0	0	0	0	0	0	0	0	0	0	0	0	0	#DIV/0!	#DIV/0!	#DIV/0!	NA	NA	NA
asRNA:CR45995	chrX	0	0	0	0	0	0	0	0	0	0	0	0	0	0	0	0	0	0	0	0	#DIV/0!	#DIV/0!	#DIV/0!	NA	NA	NA
asRNA:CR45999	chr3R	58.8745	32.59	48.2167	36.2561	31.8688	63.3457	65.3434	54.5877	45.0897	68.3152	47.0378	55.1994	46.5604	43.8235	55.0069	56.8508	13.2203	17.0484	10.1333	10.7344	-0.24051	-0.327908	0.047567	0.573526	0.555925	0.91916
asRNA:CR46012	chr3R	0	0	0	0	0	0	2.37612	1.01088	0	0	0	0	0	0	1.129	0	0	0	1.19246	0	#NUM!	#NUM!	#NUM!	NA	NA	NA
asRNA:CR46018	chr3R	1.1544	0	0	0	0	0	0	0	0	0	0	0	0.384801	0	0	0	0.666495	0	0	0	#DIV/0!	#DIV/0!	#DIV/0!	NA	NA	NA
asRNA:CR46020	chr3R	0	0	0	0	0	1.00549	0	3.03265	0.939369	1.53517	0	0	0	0.335162	1.32401	0.511724	0	0.580518	1.55248	0.886333	#NUM!	-1.98198	-1.37147	NA	NA	NA
asRNA:CR46029	chr3R	2.30881	0.794877	3.21445	1.06636	0.995899	1.00549	1.18806	0	3.75748	1.53517	1.91991	4.24611	2.10604	1.02258	1.64851	2.56706	1.22246	0.0382123	1.92059	1.46676	0.35337	-0.68895	0.638954	0.887867	NA	0.762543
asRNA:CR46033	chr3L	0	0	1.07148	0	0	1.00549	0	0	0	0	0	0	0.357161	0.335162	0	0	0.618621	0.580518	0	0	#DIV/0!	#DIV/0!	#DIV/0!	NA	NA	NA
asRNA:CR46034	chr3R	0	0	0	0	0	0	0	0	0	0	0	0	0	0	0	0	0	0	0	0	#DIV/0!	#DIV/0!	#DIV/0!	NA	NA	NA
asRNA:CR46038	chr3R	0	0	0	0	0	0	0	0	0	0	0	0	0	0	0	0	0	0	0	0	#DIV/0!	#DIV/0!	#DIV/0!	NA	NA	NA
asRNA:CR46044	chr3R	0	0	3.21445	2.13271	0.995899	2.01097	5.94031	3.03265	1.87874	1.53517	1.91991	8.49222	1.07148	1.7132	3.61723	3.98243	1.85586	0.624172	2.09294	3.91032	-1.75528	-1.0782	0.138764	0.360513	0.6259	0.935098
asRNA:CR46045	chr3R	0	0	2.14297	1.06636	0.995899	2.01097	3.56418	5.05442	1.87874	1.53517	0.959954	2.12305	0.714322	1.35774	3.49911	1.53939	1.23724	0.566811	1.58884	0.581561	-2.29234	-1.36578	-1.18463	0.167139	NA	0.419519
asRNA:CR46047	chr3L	0	0	0	0	0	0	0	0	0	0	0	0	0	0	0	0	0	0	0	0	#DIV/0!	#DIV/0!	#DIV/0!	NA	NA	NA
asRNA:CR46048	chr3L	5.77201	5.56414	6.4289	4.26542	6.97129	3.01646	14.2567	8.08707	7.51495	2.30276	0.959954	4.24611	5.92168	4.75106	9.95292	2.50294	0.451391	2.02165	3.73818	1.6522	-0.749112	-1.06687	-1.9915	0.358591	0.280472	0.037921
asRNA:CR46049	chr3L	0	0	0	0	0	0	0	0	0	0	0	0	0	0	0	0	0	0	0	0	#DIV/0!	#DIV/0!	#DIV/0!	NA	NA	NA
asRNA:CR46050	chr3L	0	0	0	0	0	1.00549	4.75224	1.01088	0.939369	0	0	0	0	0.335162	2.23417	0	0	0.580518	2.18101	0	#NUM!	-2.7368	#NUM!	NA	NA	NA
asRNA:CR46054	chr3R	0	0	0	0	0	0	0	0	0	0	0	0	0	0	0	0	0	0	0	0	#DIV/0!	#DIV/0!	#DIV/0!	NA	NA	NA
asRNA:CR46055	chr3R	4.61761	8.74365	7.50038	14.929	5.9754	7.03841	15.4448	5.05442	5.63622	3.07035	1.91991	4.24611	6.95388	9.31426	8.71181	3.07879	2.11661	4.89145	5.83819	1.16312	-0.325154	0.0964692	-1.50061	0.778294	0.933458	0.185794
asRNA:CR46058	chr3R	0	0	0	0	0	0	0	0	0	0	0	0	0	0	0	0	0	0	0	0	#DIV/0!	#DIV/0!	#DIV/0!	NA	NA	NA
asRNA:CR46065	chr4	1.1544	0	1.07148	0	0.995899	1.00549	0	1.01088	0.939369	0	0	0	0.741962	0.667129	0.650084	0	0.643894	0.57777	0.564124	0	0.190719	0.0373389	#NUM!	NA	NA	NA
asRNA:CR46066	chr2L	0	0	0	0	0	1.00549	0	0	0.939369	0.767587	0	0	0	0.335162	0.313123	0.255862	0	0.580518	0.542345	0.443166	#NUM!	0.0981305	-0.291363	NA	NA	NA
asRNA:CR46067	chr3L	1.1544	0	2.14297	2.13271	0.995899	1.00549	1.18806	2.02177	0	3.07035	0.959954	0	1.09912	1.37803	1.06994	1.34343	1.07255	0.653589	1.01605	1.57068	0.0388194	0.365077	0.328392	NA	NA	0.89107
asRNA:CR46068	chr3L	0	0	0	0	0	0	0	0	0	0	0	0	0	0	0	0	0	0	0	0	#DIV/0!	#DIV/0!	#DIV/0!	NA	NA	NA
asRNA:CR46069	chr2L	0	0	0	0	0	0	0	0	0	0	0	0	0	0	0	0	0	0	0	0	#DIV/0!	#DIV/0!	#DIV/0!	NA	NA	NA
asRNA:CR46070	chr2L	4.61761	11.9232	4.28593	6.39814	1.9918	10.0549	9.50449	10.1088	9.39369	8.44345	8.63959	8.49222	6.94223	6.14827	9.669	8.52509	4.31679	4.03734	0.384909	0.102116	-0.477968	-0.653187	-0.181653	0.632938	0.567021	0.871876
asRNA:CR46071	chr2L	0	0	0	0	0	0	0	0	0	0	0	0	0	0	0	0	0	0	0	0	#DIV/0!	#DIV/0!	#DIV/0!	NA	NA	NA
asRNA:CR46074	chr2L	0	0	0	1.06636	0.995899	0	0	0	0	0	0	0	0	0.687418	0	0	0	0.596363	0	0	#DIV/0!	#DIV/0!	#DIV/0!	NA	NA	NA
asRNA:CR46081	chr3R	3.46321	3.17951	4.28593	2.13271	5.9754	6.03292	10.6926	11.1197	11.2724	1.53517	8.63959	1.06153	3.64288	4.71368	11.0282	3.74543	0.574679	2.23537	0.300569	4.24508	-1.59805	-1.22628	-1.558	0.0686351	0.214536	0.0879631
asRNA:CR46082	chr3R	0	0.794877	0	0	0	0	0	1.01088	0	0	0	0	0.264959	0	0.336961	0	0.458922	0	0.583634	0	-0.346813	#NUM!	#NUM!	NA	NA	NA
asRNA:CR46089	chr3R	6.92642	11.1283	7.50038	9.5972	6.97129	11.0604	52.2747	60.653	58.2409	2.30276	2.87986	0	8.51836	9.20962	57.0562	1.72754	2.2784	2.0719	4.31296	1.52367	-2.74374	-2.63117	-5.04559	4.44213e-11	3.26331e-10	4.66545e-20
asRNA:CR46091	chr3R	1.1544	0	0	0	0	0	0	0	0	0	0	0	0.384801	0	0	0	0.666495	0	0	0	#DIV/0!	#DIV/0!	#DIV/0!	NA	NA	NA
asRNA:CR46092	chr3R	1.1544	0.794877	7.50038	4.26542	6.97129	5.02744	16.6329	4.04353	13.1512	2.30276	5.75973	2.12305	3.14989	5.42138	11.2759	3.39518	3.77192	1.39529	6.5008	2.04973	-1.83986	-1.0565	-1.73168	0.0597744	0.326811	0.0886837
asRNA:CR46093	chr3R	42.7129	45.308	46.0738	31.9907	32.8647	46.2524	21.3851	17.185	22.5449	19.9573	24.9588	46.7072	44.6982	37.0359	20.3717	30.5411	1.76146	7.99367	2.81998	14.2219	1.13365	0.862362	0.584188	0.00714669	0.0929459	0.289692
asRNA:CR46096	chr3R	1.1544	4.76926	3.21445	2.13271	2.9877	6.03292	14.2567	13.1415	4.69685	10.7462	6.71968	3.18458	3.04604	3.71778	10.6984	6.88349	1.8133	2.05004	5.22729	3.78348	-1.81238	-1.52488	-0.636177	0.0674087	0.160735	0.531518
asRNA:CR46097	chr3R	124.675	127.18	148.936	135.427	131.459	105.576	150.884	136.469	118.361	177.313	133.434	162.414	133.597	124.154	135.238	157.72	13.3427	16.2108	16.2966	22.3128	-0.017608	-0.123368	0.221866	0.958308	0.719183	0.34811
asRNA:CR46099	chr3R	0	1.58975	3.21445	0	1.9918	4.02195	8.31643	5.05442	3.75748	0.767587	1.91991	5.30763	1.6014	2.00458	5.70944	2.66504	1.60726	2.011	2.349	2.35996	-1.83401	-1.51005	-1.09919	0.179307	0.331371	0.385248
asRNA:CR46101	chr3R	0	0.794877	0	1.06636	0	2.01097	5.94031	3.03265	5.63622	1.53517	1.91991	0	0.264959	1.02578	4.86972	1.15169	0.458922	1.0061	1.5982	1.01578	-4.2	-2.24712	-2.08008	0.027659	NA	0.118907
asRNA:CR46104	chr3R	23.0881	19.077	19.2867	20.2608	27.8852	35.1921	30.8896	39.4244	32.8779	10.7462	3.83982	18.046	20.4839	27.7793	34.3973	10.8773	2.25767	7.46621	4.46569	7.10398	-0.747804	-0.308284	-1.66097	0.118541	0.645013	0.00102006
asRNA:CR46105	chr3R	0	0	1.07148	0	0	3.01646	4.75224	4.04353	0	0.767587	2.87986	1.06153	0.357161	1.00549	2.93193	1.56966	0.618621	1.74156	2.56373	1.14415	-3.0372	-1.54395	-0.901398	0.260406	NA	0.648934
asRNA:CR46107	chr3R	1.1544	0.794877	1.07148	1.06636	2.9877	0	1.18806	0	0	3.07035	3.83982	1.06153	1.00692	1.35135	0.39602	2.65723	0.188258	1.5141	0.685927	1.43448	1.3463	1.77076	2.74628	0.755943	NA	0.231689
asRNA:CR46109	chr3R	10.3896	5.56414	3.21445	7.46449	5.9754	6.03292	9.50449	13.1415	6.57558	4.60552	2.87986	4.24611	6.3894	6.49094	9.74052	3.9105	3.65808	0.843614	3.28931	0.910466	-0.608317	-0.585572	-1.31665	0.451624	0.576317	0.152761
asRNA:CR46128	chr3R	60.0289	45.308	50.3597	40.5215	27.8852	45.2469	36.8299	29.3156	21.6055	70.618	70.0767	92.3528	51.8989	37.8845	29.2503	77.6825	7.4802	8.97624	7.61241	12.7078	0.82725	0.373156	1.40914	0.0192992	0.454253	1.12089e-05
asRNA:CR46129	chr3R	1.1544	0	1.07148	1.06636	0	1.00549	0	0	0	0	0	0	0.741962	0.690614	0	0	0.643894	0.598863	0	0	#DIV/0!	#DIV/0!	#DIV/0!	NA	NA	NA
asRNA:CR46133	chr3R	23.0881	31.0002	35.3589	46.9197	37.8442	41.225	38.018	39.4244	38.5141	25.3304	34.5584	25.4766	29.8157	41.9963	38.6522	28.4551	6.2206	4.58664	0.713332	5.28606	-0.374476	0.119711	-0.441862	0.347601	0.839452	0.277361
asRNA:CR46134	chr3R	0	0.794877	2.14297	7.46449	7.96719	6.03292	11.8806	7.07618	15.0299	3.07035	5.75973	6.36916	0.979281	7.15487	11.3289	5.06641	1.08332	1.00362	4.00546	1.75529	-3.53214	-0.663011	-1.16097	0.00160811	0.466793	0.13992
asRNA:CR46135	chr3R	10.3896	4.76926	19.2867	14.929	22.9057	29.1591	35.6418	46.5006	37.5748	13.049	23.0389	28.6612	11.4819	22.3313	39.9057	21.583	7.32009	7.13244	5.79253	7.90729	-1.79724	-0.837532	-0.886699	0.000643048	0.156893	0.0907413
asRNA:CR46136	chr3R	0	0.794877	1.07148	0	0	0	0	0	2.81811	0	0.959954	2.12305	0.62212	0	0.939369	1.02767	0.55624	0	1.62704	1.06315	-0.5945	#NUM!	0.129612	NA	NA	NA
asRNA:CR46137	chr3R	226.263	195.54	244.298	85.3085	90.6268	88.4829	143.755	113.219	138.087	116.673	118.074	97.6605	222.034	88.1394	131.687	110.803	24.6528	2.67576	16.2432	11.403	0.753663	-0.579256	-0.249122	3.80681e-05	0.011162	0.301908
asRNA:CR46138	chr3R	1.1544	2.38463	9.64335	4.26542	4.9795	12.0658	21.3851	16.1741	13.1512	7.67587	5.75973	3.18458	4.39413	7.10359	16.9035	5.54006	4.58739	4.31225	4.16514	2.25369	-1.94367	-1.2507	-1.60935	0.0141108	0.141601	0.0448187
asRNA:CR46139	chr3R	4.61761	3.97438	2.14297	2.13271	5.9754	3.01646	2.37612	3.03265	4.69685	1.53517	2.87986	1.06153	3.57832	3.70819	3.36854	1.82552	1.28398	2.01257	1.19627	0.943299	0.0871593	0.138592	-0.883815	0.957408	0.948966	0.592764
asRNA:CR46140	chr3R	2.30881	2.38463	6.4289	5.33178	11.9508	3.01646	21.3851	12.1306	7.51495	8.44345	5.75973	7.43069	3.70744	6.76634	13.6769	7.21129	2.35715	4.63671	7.06318	1.35525	-1.88324	-1.01529	-0.923411	0.0299891	0.285549	0.281567
asRNA:CR46144	chr3R	1.1544	2.38463	4.28593	4.26542	9.95899	10.0549	8.31643	9.09795	7.51495	6.14069	4.79977	2.12305	2.60832	8.0931	8.30978	4.35451	1.5777	3.31521	0.791518	2.0455	-1.67169	-0.0381181	-0.932301	0.100508	0.988113	0.359907
asRNA:CR46145	chr3R	0	0	1.07148	0	0	0	0	0	0	0.767587	0	0	0.357161	0	0	0.255862	0.618621	0	0	0.443166	#DIV/0!	#DIV/0!	#DIV/0!	NA	NA	NA
asRNA:CR46195	chrX	85.4258	62.7953	56.7886	43.7206	39.836	46.2524	100.985	97.0448	115.542	135.863	48.9577	93.4144	68.3366	43.2697	104.524	92.745	15.1014	3.2319	9.74339	43.4564	-0.613107	-1.27241	-0.172495	0.0899892	0.000912561	0.7286
asRNA:CR46246	chr3L	0	0	0	0	0	0	0	0	0	0	0	0	0	0	0	0	0	0	0	0	#DIV/0!	#DIV/0!	#DIV/0!	NA	NA	NA
asRNA:CR46251	chr3L	0	3.97438	8.57186	2.13271	6.97129	13.0713	16.6329	10.1088	11.2724	4.60552	9.59954	0	4.18208	7.39178	12.6714	4.73502	4.28971	5.48142	3.47973	4.80108	-1.59928	-0.777579	-1.42013	0.157623	0.550745	0.226985
asRNA:CR46255	chr3R	0	0	0	0	0	0	0	0	0.939369	0	0	0	0	0	0.313123	0	0	0	0.542345	0	#NUM!	#NUM!	#NUM!	NA	NA	NA
asRNA:CR46256	chr2L	0	0.794877	6.4289	1.06636	5.9754	6.03292	5.94031	12.1306	8.45432	4.60552	3.83982	5.30763	2.40793	4.35822	8.84174	4.58432	3.50487	2.85099	3.11328	0.734138	-1.87654	-1.02059	-0.947622	0.0909827	0.399568	0.36867
asRNA:CR46261	chr3R	0	0	0	0	0	0	0	0	0	0	0	0	0	0	0	0	0	0	0	0	#DIV/0!	#DIV/0!	#DIV/0!	NA	NA	NA
asRNA:CR46262	chr2L	0	0	0	0	0.995899	0	1.18806	1.01088	0	0.767587	0	0	0	0.331966	0.732981	0.255862	0	0.574983	0.640932	0.443166	#NUM!	-1.14274	-1.51841	NA	NA	NA
asRNA:CR46263	chr2L	0	1.58975	0	0	0	0	0	1.01088	0	0	0	0	0.529918	0	0.336961	0	0.917845	0	0.583634	0	0.653187	#NUM!	#NUM!	NA	NA	NA
asRNA:CR46264	chr2L	0	0	0	0	0	0	0	0	0	0	0	0	0	0	0	0	0	0	0	0	#DIV/0!	#DIV/0!	#DIV/0!	NA	NA	NA
asRNA:CR46266	chr3L	0	0	0	0	0	0	0	0	0	0	0	0	0	0	0	0	0	0	0	0	#DIV/0!	#DIV/0!	#DIV/0!	NA	NA	NA
asRNA:CR46269	chr2R	2.30881	0	1.07148	4.26542	4.9795	1.00549	3.56418	1.01088	0.939369	0	2.87986	4.24611	1.12676	3.4168	1.83815	2.37532	1.15539	2.11856	1.49522	2.16755	-0.706067	0.894396	0.369873	0.795555	0.659488	0.888902
asRNA:CR46354	chr3R	0	0	0	0	0	1.00549	0	0	0	0	0	0	0	0.335162	0	0	0	0.580518	0	0	#DIV/0!	#DIV/0!	#DIV/0!	NA	NA	NA
asRNA:Eig63F-2	chr3L	0	0	0	0	0	0	0	0	0	0	0	0	0	0	0	0	0	0	0	0	#DIV/0!	#DIV/0!	#DIV/0!	NA	NA	NA
asRNA:TS15	chr2L	0	0	0	0	0	1.00549	0	0	0	0	0	0	0	0.335162	0	0	0	0.580518	0	0	#DIV/0!	#DIV/0!	#DIV/0!	NA	NA	NA
Ass	chr3R	9.23522	5.56414	8.57186	0	2.9877	4.02195	7.12837	4.04353	5.63622	5.37311	0.959954	1.06153	7.79041	2.33655	5.60271	2.46486	1.95633	2.08854	1.54269	2.51912	0.475575	-1.26174	-1.18462	0.624345	0.452314	0.42206
ast	chr2L	1040.12	1100.9	1258.99	1360.67	1354.42	1453.93	1171.43	1345.49	1290.69	1311.04	1557.05	1340.71	1133.34	1389.68	1269.2	1402.93	112.985	55.7373	88.9965	134.29	-0.163344	0.130826	0.144522	0.18174	0.398475	0.281742
AstA	chr3R	0	2.38463	4.28593	7.46449	0	0	2.37612	3.03265	4.69685	1.53517	0	2.12305	2.22352	2.48816	3.36854	1.21941	2.1475	4.30963	1.19627	1.09618	-0.599277	-0.437042	-1.46594	0.750772	0.856498	0.536652
AstA-R1	chrX	3.46321	3.17951	2.14297	1.06636	1.9918	6.03292	5.94031	1.01088	3.75748	2.30276	4.79977	2.12305	2.92856	3.03036	3.56956	3.0752	0.694975	2.64115	2.47008	1.49623	-0.285553	-0.236256	-0.215067	0.866407	0.927878	0.914821
AstA-R2	chr3R	10.3896	4.76926	10.7148	3.19907	16.9303	7.03841	10.6926	24.2612	16.9086	6.14069	7.67963	6.36916	8.62457	9.05592	17.2875	6.72983	3.34275	7.08444	6.79225	0.830449	-1.0032	-0.932793	-1.36108	0.14938	0.271666	0.0752107
AstC	chr2L	0	0	0	0	0	0	1.18806	0	0	0	0	0	0	0	0.39602	0	0	0	0.685927	0	#NUM!	#NUM!	#NUM!	NA	NA	NA
AstC-R1	chr3L	0	0	3.21445	0	1.9918	1.00549	4.75224	7.07618	4.69685	0	0	0	1.07148	0.999095	5.50842	0	1.85586	0.995915	1.358	0	-2.36203	-2.46295	#NUM!	0.0771393	NA	0.0236418
AstC-R2	chr3L	2.30881	0	0	0	0	0	0	0	1.87874	0	0	0	0.769602	0	0.626246	0	1.33299	0	1.08469	0	0.297382	#NUM!	#NUM!	NA	NA	NA
AstCC	chr2L	0	0	0	0	0	0	0	0	0	0	0	0	0	0	0	0	0	0	0	0	#DIV/0!	#DIV/0!	#DIV/0!	NA	NA	NA
asun	chr3R	943.147	1006.31	990.05	1011.97	1108.44	1072.85	1108.46	1287.87	1201.45	1168.27	1322.82	1128.4	979.837	1064.42	1199.26	1206.5	32.7987	48.782	89.7222	102.69	-0.29153	-0.172076	0.00867839	0.00435654	0.168741	0.963013
Asx	chr2R	1087.45	803.62	1106.84	1663.52	1918.1	2057.23	1256.97	1502.17	1398.72	1383.19	1320.9	1157.06	999.303	1879.61	1385.95	1287.05	169.743	199.658	123.099	116.801	-0.471885	0.439558	-0.10681	0.00130698	0.00626355	0.579904
Atac1	chr2L	440.982	499.183	438.237	372.158	368.483	278.52	295.827	312.363	274.296	423.708	534.695	392.765	459.467	339.72	294.162	450.389	34.4221	53.0329	19.0881	74.6319	0.64335	0.207737	0.614561	9.00754e-05	0.366307	0.000249181
Atac2	chr2L	529.871	480.9	560.386	561.97	579.613	611.336	377.803	412.44	433.049	686.99	718.046	646.47	523.719	584.306	407.764	683.835	40.0981	25.0157	27.9181	35.8921	0.361057	0.518989	0.745913	0.00208902	1.00629e-05	3.14744e-12
Atac3	chr3L	864.648	926.826	960.049	943.725	1007.85	944.153	854.216	1059.41	846.372	1109.16	1106.83	989.343	917.174	965.242	919.998	1068.44	48.4275	36.8998	120.794	68.5136	-0.00443453	0.069261	0.215809	0.978976	0.70779	0.0887212
ATbp	chrX	407.504	419.695	443.594	413.746	453.134	435.376	319.588	417.495	359.778	426.778	418.54	440.534	423.598	434.085	365.621	428.617	18.3587	19.7257	49.2139	11.1116	0.212348	0.247632	0.229343	0.125147	0.110313	0.111245
Ate1	chr2R	2103.32	2311.5	2295.12	2154.04	2196.95	1897.35	2171.78	2304.81	2249.79	2506.17	2574.6	2182.5	2236.65	2082.78	2242.13	2421.09	115.753	162.012	66.8491	209.438	-0.0035302	-0.106356	0.110789	0.981528	0.435306	0.347017
Atet	chr2L	2745.17	1763.83	2635.85	2325.72	1841.42	2725.88	2505.62	2227.99	2523.15	2249.03	1529.21	2194.18	2381.62	2297.67	2418.92	1990.8	537.802	442.896	165.583	400.694	-0.0224207	-0.074189	-0.281011	0.933154	0.833863	0.23367
Atf-2	chr2R	718.038	616.03	652.533	768.843	847.51	816.456	633.237	719.749	679.164	855.859	854.359	711.223	662.2	810.936	677.383	807.147	51.687	39.6232	43.2836	83.0761	-0.0327043	0.259616	0.25286	0.81527	0.0598459	0.0448277
Atf3	chrX	200.866	190.77	213.225	271.921	243.995	324.772	463.344	511.507	472.503	214.924	230.389	242.028	201.621	280.229	482.451	229.114	11.2463	41.0245	25.5763	13.5969	-1.25874	-0.783774	-1.07432	2.64839e-20	2.93612e-08	1.46403e-15
Atf6	chr2R	3347.77	3912.38	3673.04	3155.35	2683.95	3010.43	6452.36	3623.01	3665.42	2534.57	2983.54	3152.74	3644.4	2949.91	4580.26	2890.28	283.396	241.457	1621.42	319.459	-0.329749	-0.63476	-0.66422	0.118962	0.00305883	0.000928393
Atg1	chr3L	2827.13	2345.68	3068.73	3820.75	3879.03	4106.41	4222.37	4776.42	4379.34	3438.02	3374.24	3342.75	2747.18	3935.4	4459.38	3385	368.094	150.941	285.567	48.5394	-0.698891	-0.180333	-0.397685	2.95741e-12	0.166695	0.00016172
Atg10	chr2R	189.322	196.335	160.722	210.072	178.266	185.01	182.961	159.72	186.934	184.221	157.433	161.352	182.126	191.116	176.538	167.668	18.865	16.7593	14.7005	14.4681	0.044957	0.114465	-0.0743714	0.831109	0.671028	0.77868
Atg101	chrX	558.731	395.849	581.815	551.306	575.63	662.616	676.007	747.043	602.136	595.647	548.134	520.148	512.132	596.517	675.062	554.643	101.363	58.521	72.4581	38.1681	-0.398505	-0.178456	-0.28346	0.0163236	0.434393	0.124773
Atg12	chr3L	492.93	615.235	460.738	590.761	571.646	494.7	866.097	541.833	642.529	671.638	680.608	651.778	522.967	552.369	683.486	668.008	81.5108	50.8493	165.966	14.7539	-0.386191	-0.30728	-0.0330473	0.0403326	0.168307	0.91554
Atg13	chr3R	2605.49	2274.94	2794.43	2936.74	3123.14	3198.45	3194.7	3355.12	2995.65	2887.66	3105.45	2902.21	2558.28	3086.11	3181.82	2965.11	262.942	134.727	180.082	121.758	-0.314677	-0.0440624	-0.101768	0.00105495	0.786807	0.390201
Atg14	chr3R	864.648	861.647	799.326	863.748	853.486	896.895	823.326	874.414	846.372	870.443	893.717	902.298	841.873	871.376	848.037	888.82	36.8774	22.6875	25.5845	16.4825	-0.0105244	0.0391678	0.0677626	0.92788	0.788401	0.544107
Atg16	chr3R	1856.28	1999.12	1754.02	1603.8	1651.2	1468.01	1955.55	1820.6	1701.2	1711.72	1856.55	1731.35	1869.8	1574.34	1825.78	1766.54	123.107	95.0821	127.255	78.5679	0.0343723	-0.21377	-0.0475884	0.763876	0.0562025	0.726367
Atg17	chr3R	3465.52	2859.17	3795.19	4477.63	4427.77	4850.47	4071.49	4989.72	4763.54	4935.58	4662.5	4325.72	3373.29	4585.29	4608.25	4641.27	474.776	231.003	478.409	305.484	-0.450061	-0.00720604	0.0103001	0.000202894	0.978987	0.960078
Atg18a	chr3L	2522.37	2425.96	2521.2	2429.16	2379.2	2774.14	2088.61	2460.49	2565.42	2519.99	2232.85	2176.13	2489.84	2527.5	2371.51	2309.66	55.3251	215.051	250.548	184.346	0.0702519	0.0919076	-0.0381251	0.599425	0.571267	0.814793
Atg18b	chr2L	681.098	612.055	703.964	868.014	720.035	851.648	849.464	776.358	763.707	594.112	457.898	641.162	665.706	813.232	796.51	564.391	47.8488	81.1248	46.2937	95.1785	-0.258808	0.0299752	-0.496998	0.0870055	0.91273	0.000631623
Atg2	chr3L	1772.01	1360.83	1732.59	2280.94	2252.72	2736.94	2452.16	2691.98	2468.66	1808.43	1671.28	1855.55	1621.81	2423.53	2537.6	1778.42	226.872	271.783	133.952	95.7304	-0.645862	-0.0663542	-0.512868	8.79555e-08	0.743636	3.53075e-05
Atg3	chr3L	1737.38	1685.14	1672.59	1503.56	1659.17	1566.55	1310.43	1540.59	1410.93	1745.49	1609.84	1509.49	1698.37	1576.43	1420.65	1621.61	34.3611	78.2719	115.385	118.439	0.257597	0.150107	0.190875	0.00799729	0.217566	0.0674044
Atg4a	chr2L	1395.67	1607.24	1459.36	1506.76	1625.31	1557.5	1447.06	1755.9	1742.53	1803.06	1825.83	1719.67	1487.42	1563.19	1648.5	1782.86	108.54	59.4778	174.579	55.8895	-0.148335	-0.0766592	0.113038	0.185406	0.616634	0.367651
Atg4b	chr3R	1797.4	1655.73	1782.95	2036.74	2175.04	2215.09	1823.67	1753.88	1728.44	1946.6	1815.27	2075.29	1745.36	2142.29	1768.67	1945.72	77.9593	93.5769	49.3083	130.008	-0.0191361	0.276493	0.137643	0.861797	0.00215638	0.14922
Atg5	chrX	930.448	1026.19	920.404	925.597	850.498	760.148	888.67	1034.13	838.857	1295.69	1391.93	1221.82	959.013	845.414	920.553	1303.15	58.3901	82.8413	101.468	85.3031	0.0590487	-0.122843	0.501425	0.687027	0.474246	2.02083e-05
Atg6	chr3R	961.617	1061.16	963.263	967.185	878.383	783.275	790.061	830.946	809.736	1121.44	1049.23	1047.73	995.347	876.281	810.248	1072.8	57.0021	91.9731	20.4474	42.1333	0.296837	0.11303	0.404947	0.00463222	0.447771	8.92282e-05
Atg7	chr2R	1685.43	1820.27	1667.23	1842.66	1770.71	1709.33	1753.58	1657.85	1660.8	1951.21	1881.51	1901.19	1724.31	1774.23	1690.74	1911.3	83.6007	66.7372	54.4363	35.9302	0.0283592	0.0695376	0.176899	0.750772	0.525095	0.0270847
Atg8a	chrX	8379.81	9126.78	8198.99	7792.93	7009.14	7113.82	8999.56	8602.62	8474.99	8115.69	7588.44	7520.92	8568.52	7305.3	8692.39	7741.68	491.841	425.533	273.567	325.656	-0.0207061	-0.25081	-0.167106	0.845446	0.00286471	0.0477614
Atg8b	chr3R	0	0	0	0	0	0	0	0	0	0	0	0	0	0	0	0	0	0	0	0	#DIV/0!	#DIV/0!	#DIV/0!	NA	NA	NA
Atg9	chr2R	1703.9	1485.62	2018.67	1937.57	1508.79	2138.67	2107.62	2054.11	2044.07	2061.74	1572.41	1926.67	1736.07	1861.68	2068.6	1853.6	267.977	321.727	34.1634	252.716	-0.252834	-0.152054	-0.158322	0.137597	0.505105	0.421118
atilla	chr2L	1027.42	1441.91	793.969	443.604	509.9	510.788	1260.53	1265.63	1391.21	1053.9	1134.67	984.035	1087.76	488.097	1305.79	1057.53	328.157	38.5349	74.0177	75.3811	-0.263555	-1.41968	-0.304219	0.190225	1.13653e-15	0.142894
atk	chr3L	2.30881	0.794877	1.07148	1.06636	2.9877	1.00549	0	1.01088	2.81811	2.30276	0	1.06153	1.39172	1.68651	1.27633	1.12143	0.806169	1.12727	1.42768	1.15255	0.124869	0.402042	-0.186664	0.987835	NA	0.9483
atl	chr3R	4960.47	5049.06	5281.34	5085.45	4801.23	5232.56	4482.56	4619.74	4663.03	4923.3	4407.15	4991.3	5096.96	5039.75	4588.44	4773.92	165.712	219.265	94.2194	319.444	0.151632	0.135347	0.0571696	0.0563693	0.147628	0.563995
atms	chr3R	2675.91	3069.81	2616.56	2502.74	2635.15	2465.45	2088.61	2667.72	2698.81	2959.05	3014.26	2901.15	2787.43	2534.45	2485.05	2958.15	246.348	89.1807	343.675	56.557	0.165661	0.028398	0.251423	0.180675	0.897004	0.0406885
ato	chr3R	0	0.794877	0	0	0	0	0	0	0	0.767587	0	0	0.264959	0	0	0.255862	0.458922	0	0	0.443166	#DIV/0!	#DIV/0!	#DIV/0!	NA	NA	NA
Atox1	chr3L	2740.55	2869.51	2462.27	2171.1	2021.68	2196.99	2886.99	2045.02	2277.03	2012.61	1732.72	1661.29	2690.78	2129.92	2403.01	1802.21	208.132	94.6337	434.894	185.684	0.163178	-0.174043	-0.41508	0.281117	0.344229	0.003347
ATP6AP2	chr3R	7712.56	8593.41	8338.28	7545.53	7283.01	7252.58	7826.95	7344.07	7981.82	7906.91	7733.39	7735.35	8214.75	7360.37	7717.61	7791.88	453.231	161.073	332.638	99.6209	0.0900627	-0.0683752	0.0138175	0.228412	0.481503	0.898718
ATP7	chrX	1818.18	1429.98	1852.59	1941.83	2050.56	2528.8	2155.14	2482.73	2319.3	1658.75	1716.4	1798.23	1700.25	2173.73	2319.06	1724.46	234.693	312.268	163.793	70.0846	-0.447789	-0.0933661	-0.427395	0.000759163	0.651842	0.00176858
ATP8A	chr2R	1653.1	1476.09	1718.66	2118.85	2013.71	2235.2	2038.71	2093.54	2011.19	1638.8	1546.49	1727.1	1615.95	2122.59	2047.81	1637.46	125.482	110.792	41.9223	90.3164	-0.341702	0.0517378	-0.322623	0.00011029	0.718868	0.000360713
ATP8B	chr3R	138.528	124.796	118.935	222.868	199.18	277.514	314.836	288.102	249.872	121.279	117.114	98.722	127.42	233.188	284.27	112.372	10.0569	40.1739	32.6511	12.003	-1.15768	-0.285771	-1.33898	1.59212e-10	0.217566	1.11212e-13
Atpalpha	chr3R	26603.2	28322.3	28502.5	29019.8	29133	28152.6	24212.7	29212.5	28612.2	33608	32293.8	31160.1	27809.3	28768.5	27345.8	32354	1048.41	536.345	2729.91	1225.08	0.0242489	0.0731698	0.242623	0.831134	0.562914	0.00633162
ATPCL	chr2R	8330.17	7930.49	9214.75	8784.64	7757.06	10256	7659.43	8051.68	8620.59	7502.39	6880.95	9845.66	8491.8	8932.56	8110.57	8076.34	657.214	1256.01	483.278	1563.47	0.0662678	0.13927	-0.00610233	0.721198	0.511334	0.980554
ATPsynB	chr3L	11198.9	11539.2	10275.5	8449.8	8353.6	8921.69	8385.34	7831.31	9204.88	8521.75	8227.77	8619.6	11004.5	8575.03	8473.84	8456.37	653.879	304.043	691.047	203.932	0.37701	0.0171257	-0.00297764	3.32989e-06	0.91761	0.983269
ATPsynbeta	chr4	70537.5	72754.3	70692.2	69664	58787.9	62621.7	60281	55826	57135.3	58384.2	60458.9	59425.3	71328	63691.2	57747.4	59422.8	1237.64	5516.33	2289.73	1037.36	0.304711	0.141337	0.0412595	5.12335e-05	0.130616	0.698749
ATPsynbetaL	chr3L	0	0.794877	0	0	0	2.01097	0	8.08707	0	1.53517	0	1.06153	0.264959	0.670325	2.69569	0.865567	0.458922	1.16104	4.66907	0.786123	-3.34681	-2.00772	-1.63894	NA	NA	0.504792
ATPsynC	chr3R	83386	82334.1	83733.2	77808.8	69720.9	72390.1	52852.1	59509.7	61782.3	75816.1	73628.5	74671	83151.1	73306.6	58048	74705.2	728.496	4121.1	4641.07	1094.18	0.518488	0.336696	0.363961	1.73615e-12	2.39743e-05	1.55143e-06
ATPsynCF6	chr3R	8617.61	8839.83	8112.2	6396	6702.4	6235.03	4677.4	5496.17	5844.76	6959.71	6641.92	7484.83	8523.21	6444.48	5339.44	7028.82	372.886	237.428	599.253	425.68	0.674709	0.271374	0.396594	2.77104e-13	0.0132203	4.49045e-05
ATPsynCF6L	chr3L	0	0	0	0	0	0	0	0	0	0	0	0	0	0	0	0	0	0	0	0	#DIV/0!	#DIV/0!	#DIV/0!	NA	NA	NA
ATPsynD	chr3R	7548.64	7669.77	7423.23	6892.92	6352.84	6622.14	5460.33	5568.96	5794.97	6433.14	6137.95	6917.97	7547.21	6622.63	5608.08	6496.35	123.272	270.042	170.717	393.835	0.428436	0.239897	0.212122	2.55816e-10	0.00174553	0.00388514
ATPsyndelta	chrX	8980.1	9721.34	8774.38	7566.86	7405.51	7287.77	7824.57	6962.96	7784.55	7390.32	7059.5	7258.72	9158.61	7420.05	7524.03	7236.18	498.083	140.112	486.309	166.558	0.283622	-0.0200773	-0.0562766	0.000113803	0.886121	0.566051
ATPsynE	chr3R	4998.56	5375.75	4845.25	4075.61	4461.63	4014.91	3351.52	3485.53	3800.69	5289.44	4845.85	5137.79	5073.19	4184.05	3545.91	5091.03	273.012	242.298	230.592	225.462	0.516736	0.238744	0.5218	2.56342e-10	0.013056	1.59031e-10
ATPsynepsilonL	chr3R	11.544	11.1283	3.21445	13.8626	4.9795	7.03841	0	6.0653	2.81811	3.83793	2.87986	4.24611	8.62892	8.62684	2.96114	3.65463	4.69367	4.64971	3.03518	0.701324	1.54303	1.54268	0.303577	0.168057	0.252001	0.916714
ATPsynF	chr2R	8643.01	9888.27	7415.73	6408.8	6392.68	6380.82	8110.89	5909.62	7622.04	6203.63	5903.72	6721.59	8649	6394.1	7214.19	6276.31	1236.28	14.0425	1155.92	413.75	0.261697	-0.174096	-0.200919	0.0668522	0.338723	0.203029
ATPsynG	chr2L	5725.84	6102.27	5048.83	4073.48	4156.88	4001.84	5386.67	4339.72	4756.97	4081.26	4198.84	4497.69	5625.64	4077.4	4827.79	4259.26	533.82	77.5963	527.055	214.691	0.220657	-0.243712	-0.180758	0.0418443	0.0457585	0.125881
ATPsyngamma	chr3R	13174	13905.6	12572.8	11127.4	11072.4	11244.4	9662.5	9774.23	10838.4	11255.9	10523	11255.4	13217.5	11148.1	10091.7	11011.4	667.457	87.817	649.085	422.973	0.389273	0.143621	0.125829	5.36589e-08	0.10974	0.135445
ATPsynGL	chr2L	0	0	0	0	0	0	0	0	0	0	0	0	0	0	0	0	0	0	0	0	#DIV/0!	#DIV/0!	#DIV/0!	NA	NA	NA
ATPsynO	chr3R	9122.09	10065.5	8509.72	7122.19	6805.98	7008.25	8000.4	6832.56	8062.61	7239.88	7141.1	7734.29	9232.44	6978.8	7631.86	7371.75	783.752	160.151	692.91	317.822	0.274679	-0.129054	-0.0500262	0.00395602	0.301305	0.705907
att-ORFB	chr3R	0	0	0	0	0	0	0	0	0	0	0	0	0	0	0	0	0	0	0	0	#DIV/0!	#DIV/0!	#DIV/0!	NA	NA	NA
AttA	chr2R	1.1544	0	4.28593	13.8626	7.96719	3.01646	13.0687	12.1306	11.2724	0.767587	1.91991	4.24611	1.81344	8.28209	12.1572	2.3112	2.21767	5.42993	0.898417	1.77196	-2.74501	-0.553748	-2.3951	0.00959945	0.589362	0.0195445
AttB	chr2R	20.7792	39.7438	86.7901	30.9243	0.995899	6.03292	71.2837	32.3483	46.0291	6.90828	0.959954	2.12305	49.1044	12.651	49.887	3.33043	33.9864	16.0243	19.7523	3.15261	-0.0228117	-1.97941	-3.90488	0.984872	0.161486	0.0296779
AttC	chr2R	9.23522	7.15389	109.291	7.46449	0	4.02195	49.8986	73.7945	54.4834	0	0	1.06153	41.8935	3.82881	59.3922	0.353842	58.3775	3.73599	12.6817	0.612873	-0.503547	-3.9553	-7.39102	NA	NA	NA
AttD	chr3R	0	0	2.14297	0	0	0	5.94031	3.03265	0	0	0	0	0.714322	0	2.99099	0	1.23724	0	2.97037	0	-2.06597	#NUM!	#NUM!	NA	NA	NA
Atu	chr3R	2717.46	2515.79	2579.06	2673.35	2759.64	2709.79	2220.49	2651.55	2755.17	3294.48	3251.37	3215.37	2604.1	2714.26	2542.4	3253.74	103.145	43.3147	283.56	39.6116	0.0345948	0.0943671	0.355906	0.780044	0.474246	9.56076e-05
Atx-1	chrX	6.92642	5.56414	4.28593	7.46449	3.9836	10.0549	2.37612	2.02177	2.81811	8.44345	4.79977	8.49222	5.59216	7.16765	2.40533	7.24515	1.32046	3.0465	0.398973	2.1179	1.21717	1.57526	1.59078	0.338564	0.219563	0.163901
Atx2	chr3R	3070.71	2857.58	3626.97	4622.65	4868.95	5176.25	3980.01	5244.46	4756.97	4060.53	4098.04	4110.23	3185.09	4889.28	4660.48	4089.6	397.242	277.357	637.727	25.9027	-0.549145	0.0691454	-0.188517	3.68432e-06	0.724631	0.177992
Atxn7	chr2L	1147.48	1071.49	1056.48	1224.18	1318.57	1297.08	973.022	1075.58	1107.52	1334.07	1329.54	1206.96	1091.82	1279.94	1052.04	1290.19	48.7827	49.4753	70.2694	72.1148	0.0535429	0.28289	0.29439	0.656359	0.00539826	0.00175479
aub	chr2L	3878.79	3344.84	4129.5	5203.82	4972.52	5773.51	3850.51	4392.29	4128.53	3873.24	3700.62	4149.51	3784.38	5316.62	4123.77	3907.79	400.757	412.233	270.922	226.428	-0.12391	0.366543	-0.0776118	0.298009	0.00131686	0.576628
aurA	chr3R	3180.38	3494.28	3008.72	2977.27	3208.79	2712.8	3157.87	3350.07	3114.95	3962.28	3936.77	3625.11	3227.79	2966.29	3207.63	3841.39	246.225	248.174	125.209	187.734	0.00904196	-0.112849	0.260122	0.940247	0.383697	0.0082008
aurB	chr2L	1541.13	1885.45	1553.65	1629.39	1636.26	1483.09	1687.05	1719.51	1825.19	2007.24	2216.53	1934.1	1660.08	1582.92	1743.92	2052.63	195.279	86.5168	72.2351	146.584	-0.0710835	-0.139747	0.235138	0.594516	0.33083	0.0431468
aust	chr2L	1.1544	0	0	0	0	0	0	2.02177	0.939369	0.767587	0	0	0.384801	0	0.987045	0.255862	0.666495	0	1.01173	0.443166	-1.359	#NUM!	-1.94775	NA	NA	NA
aux	chr3R	2457.72	2211.35	2925.15	3590.42	3342.24	4076.25	3321.82	4163.83	3794.11	3064.21	3166.89	3018.98	2531.41	3669.63	3759.92	3083.36	362.56	373.36	422.044	75.7907	-0.570763	-0.0350656	-0.286199	5.61287e-06	0.883142	0.039728
ave	chr2R	624.532	857.672	637.532	490.524	548.74	353.932	607.099	451.865	511.956	570.317	642.209	658.147	706.579	464.399	523.64	623.558	131.012	99.9976	78.274	46.7914	0.432275	-0.173212	0.251947	0.0271353	0.545227	0.265983
Aven	chrX	603.753	565.157	544.313	564.102	640.363	553.018	503.738	591.367	497.866	627.886	612.451	619.932	571.074	585.828	530.99	620.089	30.1581	47.5531	52.37	7.7187	0.104994	0.141792	0.223791	0.4418	0.365587	0.0777157
awd	chr3R	55037.3	59795.4	50205.4	44589.7	43269.8	42409.4	41689.1	37913.2	41836.7	44382.6	42990.6	47178.5	55012.7	43423	40479.6	44850.6	4795.04	1098.15	2223.85	2132.81	0.442568	0.101262	0.14793	7.76375e-08	0.385581	0.124148
Awh	chr3L	1.1544	0	0	0	0	0	0	1.01088	0	0	0	0	0.384801	0	0.336961	0	0.666495	0	0.583634	0	0.19153	#NUM!	#NUM!	NA	NA	NA
axed	chr3L	13.8528	11.1283	6.4289	4.26542	10.9549	1.00549	19.009	21.2285	21.6055	8.44345	8.63959	4.24611	10.47	5.4086	20.6143	7.10972	3.75549	5.07226	1.403	2.4819	-0.977387	-1.93032	-1.53578	0.122158	0.0120442	0.0260927
Axn	chr3R	3769.12	2862.35	3619.47	4469.1	4675.75	4608.15	3697.25	5012.97	4566.27	4614.73	4322.67	3811.94	3416.98	4584.33	4425.5	4249.78	486.118	105.363	669.063	406.327	-0.373117	0.0508717	-0.0584504	0.00819435	0.837363	0.773175
axo	chr3L	15.0072	14.3078	8.57186	13.8626	6.97129	7.03841	17.8209	13.1415	25.363	0	4.79977	12.7383	12.629	9.29078	18.7751	5.84603	3.53091	3.95948	6.16637	6.43329	-0.572087	-1.01495	-1.68329	0.474834	0.287192	0.0553456
Axs	chrX	1134.78	1381.5	1243.99	1334.01	1300.64	1231.72	1144.1	1223.17	1360.21	1337.9	1252.74	1298.25	1253.42	1288.79	1242.49	1296.3	123.629	52.1644	109.34	42.615	0.0126346	0.0527825	0.0611589	0.925499	0.769109	0.677966
Axud1	chr2L	472.151	376.772	492.882	780.573	688.166	865.725	925.5	776.358	716.739	515.818	599.011	617.809	447.268	778.154	806.199	577.546	61.9255	88.8038	107.532	54.2779	-0.849996	-0.0510793	-0.4812	1.39946e-08	0.857363	0.00233667
az2	chr2R	1032.04	1224.91	1065.05	1101.55	1322.55	1144.24	1107.27	1374.8	1126.3	1397.01	1542.65	1368.31	1107.33	1189.45	1202.79	1435.99	103.151	117.234	149.267	93.4775	-0.1193	-0.0160957	0.255655	0.422105	0.949304	0.0651286
azot	chr2R	0	0	0	0	0	0	1.18806	0	0	0	0	0	0	0	0.39602	0	0	0	0.685927	0	#NUM!	#NUM!	#NUM!	NA	NA	NA
b	chr2L	10.3896	8.74365	5.35742	3.19907	6.97129	8.0439	9.50449	10.1088	7.51495	11.5138	7.67963	26.5382	8.16356	6.07142	9.04276	15.2439	2.56577	2.54469	1.35718	9.96726	-0.147564	-0.574729	0.753394	0.889435	0.660546	0.339056
B-H1	chrX	0	0	0	0	0	0	0	0	0	0	0	0	0	0	0	0	0	0	0	0	#DIV/0!	#DIV/0!	#DIV/0!	NA	NA	NA
B-H2	chrX	0	0	0	0	0	0	0	0	0	0	0	0	0	0	0	0	0	0	0	0	#DIV/0!	#DIV/0!	#DIV/0!	NA	NA	NA
B4	chr2L	3699.86	3280.46	4231.29	4085.21	4079.2	4582.01	5476.96	6256.36	5822.21	4807.39	5014.8	4637.81	3737.2	4248.81	5851.84	4820	476.514	288.575	390.541	188.811	-0.646933	-0.461834	-0.279857	3.66232e-10	3.41862e-05	0.0138581
B52	chr3R	10811	9960.6	11584.9	11349.2	10420.1	12813.9	9609.04	11176.3	10970	12421.1	12562.9	11734.1	10785.5	11527.7	10585.1	12239.4	812.437	1206.86	851.573	443.275	0.0270554	0.123075	0.209494	0.848456	0.388667	0.0669657
b6	chrX	0	1.58975	0	1.06636	0	0	0	0	3.75748	0.767587	0	0	0.529918	0.355452	1.25249	0.255862	0.917845	0.615661	2.16938	0.443166	-1.24096	-1.81708	-2.29136	NA	NA	NA
B9d1	chr3R	0	0	0	1.06636	0	0	0	0	0	1.53517	0	0	0	0.355452	0	0.511724	0	0.615661	0	0.886333	#DIV/0!	#DIV/0!	#DIV/0!	NA	NA	NA
B9d2	chr2L	0	0	0	0	0	0	0	0	0	0	0	0	0	0	0	0	0	0	0	0	#DIV/0!	#DIV/0!	#DIV/0!	NA	NA	NA
bab1	chr3L	3.46321	9.53852	4.28593	6.39814	4.9795	3.01646	2.37612	13.1415	8.45432	2.30276	1.91991	7.43069	5.76255	4.79803	7.99064	3.88445	3.29586	1.69812	5.39764	3.07709	-0.471603	-0.735869	-1.0406	0.663511	0.5669	0.347017
bab2	chr3L	10.3896	3.17951	20.3582	18.128	21.9098	13.0713	16.6329	23.2503	22.5449	11.5138	8.63959	10.6153	11.3091	17.7031	20.8093	10.2562	8.62617	4.43452	3.6341	1.47036	-0.879747	-0.233233	-1.02073	0.165867	0.802634	0.144362
babo	chr2R	3337.38	2565.07	3369.81	3524.31	3773.46	4261.25	3116.28	3491.59	3288.73	3335.16	3061.29	3141.06	3090.75	3853.01	3298.87	3179.17	455.546	374.859	187.858	140.857	-0.094013	0.224014	-0.0533204	0.513994	0.135732	0.764819
babos	chr2R	1903.61	2188.3	1769.02	2047.4	1880.26	1863.17	1917.53	1348.52	1655.17	1318.71	1066.51	1797.17	1953.64	1930.28	1640.41	1394.13	214.07	101.794	284.793	371.12	0.252113	0.234755	-0.234688	0.213783	0.342779	0.288978
Bacc	chr2L	6591.64	7382.02	6724.63	6464.25	6343.88	5256.69	9001.94	7978.9	7567.56	6248.92	5715.57	5707.83	6899.43	6021.6	8182.8	5890.77	423.194	665.166	738.609	310.19	-0.246118	-0.442447	-0.474137	0.0279347	8.47555e-05	8.88563e-06
Bace	chr2L	0	0	0	0	0.995899	0	0	0	0	0	0	0	0	0.331966	0	0	0	0.574983	0	0	#DIV/0!	#DIV/0!	#DIV/0!	NA	NA	NA
baf	chr2L	3782.98	4293.92	3434.1	3051.91	2970.77	2839.5	4350.68	3545.17	4024.26	3316.74	3619.03	3288.61	3837	2954.06	3973.37	3408.13	432.449	107.189	405.16	183.186	-0.0503832	-0.427664	-0.221384	0.72159	0.000223033	0.067195
bai	chr3R	5894.38	5956.81	5105.62	4609.86	4186.76	4277.34	5668.24	4512.58	5102.65	4230.17	4146.04	4619.77	5652.27	4357.99	5094.49	4331.99	474.441	222.778	577.872	252.743	0.149891	-0.225277	-0.233908	0.201918	0.078248	0.0452535
Balat	chr2R	0	0	1.07148	2.13271	0.995899	0	2.37612	1.01088	1.87874	0.767587	0.959954	0	0.357161	1.04287	1.75525	0.575847	0.618621	1.06713	0.690946	0.507889	-2.29703	-0.751115	-1.60792	NA	NA	NA
Baldspot	chr3L	4541.42	4090.44	4914.89	4829.53	4622.96	5462.81	4173.66	4316.47	4149.19	4676.91	4062.53	4255.66	4515.58	4971.77	4213.11	4331.7	412.835	437.619	90.3471	314.168	0.100027	0.238874	0.0400476	0.395352	0.0426472	0.786043
ball	chr3R	3809.53	4529.21	3917.34	4111.87	4155.89	3801.75	3122.22	4342.75	4090.95	5419.16	5724.21	5029.51	4085.36	4023.17	3851.98	5390.96	388.146	193.015	644.403	348.204	0.0848638	0.0627326	0.484943	0.589459	0.772654	0.000186818
bam	chr3R	699.568	700.287	733.966	1008.77	909.256	1001.47	872.037	1019.98	1012.64	1389.33	1250.82	1218.63	711.273	973.165	968.219	1286.26	19.6555	55.467	83.3773	90.7005	-0.44493	0.00734991	0.409778	1.53838e-05	0.982555	6.11233e-05
ban	chr3L	0	0	0	0	0	0	0	0	0	0	0	0	0	0	0	0	0	0	0	0	#DIV/0!	#DIV/0!	#DIV/0!	NA	NA	NA
bap	chr3R	0	0	0	0	1.9918	0	0	0	0	0	0	0	0	0.663933	0	0	0	1.14997	0	0	#DIV/0!	#DIV/0!	#DIV/0!	NA	NA	NA
Bap111	chrX	3630.6	3517.33	3845.55	4022.29	4177.8	4212.99	3957.43	5012.97	4715.63	4253.96	4195	4025.31	3664.49	4137.69	4562.01	4158.09	166.716	101.477	544.279	118.711	-0.316057	-0.140843	-0.133749	0.000966228	0.254514	0.233619
Bap170	chr2R	2859.46	2247.91	3346.24	4269.69	4731.52	5522.14	4650.07	6775.95	5807.18	4038.27	4286.2	4023.19	2817.87	4841.11	5744.4	4115.89	550.345	633.375	1064.33	147.686	-1.02755	-0.246817	-0.480954	1.64745e-10	0.254154	0.0058554
Bap55	chr2R	2555.85	3027.69	2702.28	2419.56	2511.66	2284.47	1988.81	2379.62	2355.94	3019.69	3064.17	2868.25	2761.94	2405.23	2241.46	2984.04	241.51	114.272	219.115	102.714	0.301244	0.101737	0.412828	0.00333482	0.491404	4.58964e-05
Bap60	chrX	5032.04	5777.16	5275.98	5374.43	5132.86	4928.9	5642.1	5658.92	5610.85	5591.1	6219.54	5550.72	5361.73	5145.4	5637.29	5787.12	379.891	223.032	24.3941	375.031	-0.0723042	-0.13172	0.0378437	0.455496	0.204423	0.747945
barc	chr3L	2825.98	2859.17	3022.65	3041.25	3183.89	3000.37	2415.33	2866.86	2952.44	3158.62	3053.61	3135.75	2902.6	3075.17	2744.88	3115.99	105.285	96.3462	288.587	55.2195	0.0806048	0.163925	0.182951	0.448095	0.139627	0.0641936
bark	chr2L	872.728	700.287	877.545	931.995	836.555	1067.83	954.013	930.013	977.883	743.024	615.331	780.222	816.853	945.459	953.97	712.859	100.978	116.222	23.9354	86.4855	-0.223867	-0.0129281	-0.420327	0.133866	0.965098	0.00371468
barr	chr2L	1895.53	2164.45	2286.54	2485.68	3022.55	2401.1	2226.43	2969.97	2584.2	2816.28	3400.16	2939.37	2115.51	2636.44	2593.54	3051.93	200.05	337.044	371.862	307.787	-0.293916	0.0236734	0.234804	0.0459803	0.933994	0.142732
baz	chrX	1083.98	855.287	1118.63	1069.55	1242.88	1390.59	1555.17	1735.69	1464.48	1077.69	982.033	1064.71	1019.3	1234.34	1585.11	1041.48	143.091	160.687	138.062	51.8888	-0.637006	-0.360842	-0.605951	1.92846e-06	0.0206021	8.00468e-06
bb8	chr3R	0	0.794877	1.07148	1.06636	0	2.01097	1.18806	1.01088	0	2.30276	1.91991	0	0.62212	1.02578	0.732981	1.40756	0.55624	1.0061	0.640932	1.23392	-0.236584	0.484868	0.941344	NA	NA	NA
bbc	chr2R	5633.48	5447.29	6018.52	5987.59	6272.17	6278.26	6138.71	6401.92	6508.89	5975.66	6099.55	6275.75	5699.77	6179.34	6349.84	6116.99	291.326	166.091	190.505	150.801	-0.155818	-0.0392676	-0.0538996	0.0218701	0.709701	0.522976
bbg	chr3L	1412.99	1255.91	1509.72	1820.27	1583.48	1849.09	1565.86	1368.74	1462.6	1354.02	1203.78	1513.74	1392.87	1750.95	1465.73	1357.18	128.097	145.745	98.6018	155.002	-0.0735602	0.256513	-0.111009	0.616445	0.0725452	0.468116
BBIP1	chr3R	0	0	0	0	0	0	0	0	0	0	0	0	0	0	0	0	0	0	0	0	#DIV/0!	#DIV/0!	#DIV/0!	NA	NA	NA
BBS1	chr3L	2.30881	0	0	0	0.995899	0	1.18806	0	0	3.07035	0	0	0.769602	0.331966	0.39602	1.02345	1.33299	0.574983	0.685927	1.77267	0.958537	-0.254538	1.36979	NA	NA	NA
BBS4	chr2R	10.3896	4.76926	6.4289	0	0	0	0	0	0	0	0	0	7.19593	0	0	0	2.88762	0	0	0	#DIV/0!	#DIV/0!	#DIV/0!	0.00440737	NA	1
BBS5	chr3R	1.1544	1.58975	1.07148	0	0	2.01097	0	2.02177	0.939369	0.767587	0.959954	1.06153	1.27188	0.670325	0.987045	0.929689	0.278391	1.16104	1.01173	0.149289	0.365774	-0.558256	-0.0863676	NA	NA	0.969121
BBS8	chr2L	0	0.794877	0	0	1.9918	1.00549	1.18806	0	1.87874	0	0	1.06153	0.264959	0.999095	1.02227	0.353842	0.458922	0.995915	0.950279	0.612873	-1.94793	-0.0330774	-1.53059	NA	NA	NA
BBS9	chr2R	6.92642	0	2.14297	0	0	1.00549	1.18806	2.02177	1.87874	0	0.959954	0	3.02313	0.335162	1.69619	0.319985	3.5461	0.580518	0.445824	0.55423	0.833745	-2.33936	-2.40622	0.608117	NA	0.52989
bbx	chrX	9.23522	10.3334	9.64335	12.7963	13.9426	11.0604	21.3851	12.1306	11.2724	40.6821	33.5984	36.0919	9.73732	12.5997	14.9294	36.7908	0.555088	1.45113	5.60726	3.59319	-0.616557	-0.24476	1.30119	0.352968	0.804547	0.00218016
bc10	chr3L	2648.2	2319.45	2625.13	2678.69	2930.93	2476.52	2276.33	2774.87	2386.94	2943.69	2885.62	2322.62	2530.93	2695.38	2479.38	2717.31	183.507	227.667	261.815	343.044	0.0296876	0.120508	0.132202	0.86589	0.508432	0.392925
BCAS2	chr3R	1363.35	1567.5	1316.85	1086.62	1158.23	1003.48	1388.84	1238.33	1352.69	1527.5	1395.77	1493.57	1415.9	1082.77	1326.62	1472.28	133.33	77.4487	78.5694	68.3937	0.0939613	-0.293025	0.150294	0.427025	0.0132008	0.212952
bcd	chr3R	2410.39	2089.73	2288.69	2959.14	3410.95	3233.65	2627.99	2806.21	2359.7	3264.55	3777.42	2945.74	2262.94	3201.25	2597.97	3329.23	161.874	227.645	224.767	419.598	-0.199186	0.301251	0.357808	0.117718	0.025624	0.003347
bchs	chr2L	293.218	207.463	286.086	427.609	362.507	427.332	556.013	422.549	450.897	363.068	228.469	359.858	262.256	405.816	476.486	317.132	47.5858	37.5067	70.3152	76.8009	-0.861461	-0.231609	-0.587353	3.09328e-05	0.42605	0.00738286
BCL7-like	chrX	1446.47	1482.45	1568.65	1688.04	1706.97	1576.6	1715.56	1926.74	1601.62	1901.31	2238.61	1732.41	1499.19	1657.21	1747.98	1957.45	62.7894	70.4417	164.966	257.727	-0.221505	-0.076933	0.163287	0.0713873	0.6748	0.226281
bcn92	chrX	1115.15	1094.55	1027.55	938.393	969.01	905.944	869.661	849.142	870.795	964.089	904.277	990.405	1079.08	937.782	863.199	952.923	45.8014	31.5374	12.1873	44.1361	0.322041	0.119559	0.142667	0.000131947	0.289369	0.143892
Bdbt	chr3R	1573.45	1790.86	1425.07	1263.63	1308.61	1119.11	1640.71	1271.69	1620.41	1529.03	1430.33	1501	1596.46	1230.45	1510.94	1486.79	183.975	99.0138	207.443	50.8618	0.0794316	-0.296259	-0.0232462	0.607667	0.0521641	0.914293
bdg	chr2R	899.28	725.723	992.193	1197.52	1177.15	1395.62	1315.18	1296.96	1090.61	1047.76	1064.59	916.098	872.398	1256.76	1234.25	1009.48	135.254	120.681	124.732	81.309	-0.500577	0.0260753	-0.290023	0.000372719	0.924497	0.0628065
bdl	chr2L	66.9553	57.2311	75.0038	85.3085	105.565	73.4006	71.2837	136.469	119.3	99.0187	150.713	88.1067	66.3968	88.0915	109.018	112.613	8.8995	16.262	33.7873	33.4437	-0.715376	-0.307487	0.046809	0.0260689	0.476888	0.93277
Bdp1	chr2L	999.713	894.236	1138.99	1075.95	1137.32	1102.01	773.428	917.882	929.036	1247.33	1311.3	1151.76	1010.98	1105.09	873.449	1236.79	122.763	30.7977	86.7999	80.2904	0.210958	0.339375	0.501811	0.107257	0.0118878	2.39298e-05
be	chrX	1204.04	1003.13	1257.92	1172.99	1133.33	1217.65	975.398	1072.55	1012.64	934.92	1022.35	1100.8	1155.03	1174.66	1020.2	1019.36	134.278	42.1805	49.0131	82.982	0.179088	0.203394	-0.00118374	0.152097	0.147628	0.986668
BEAF-32	chr2R	3674.46	3975.18	3545.54	3106.29	3344.23	2872.68	2976.09	3187.31	3074.56	3726.63	3806.22	3597.51	3731.73	3107.73	3079.32	3710.12	220.471	235.779	105.691	105.327	0.277231	0.0132505	0.268854	0.000949257	0.93825	0.00177928
beag	chr3R	1187.88	1152.57	1182.92	1090.88	1203.05	1040.68	977.774	1018.97	1001.37	1268.82	1250.82	1220.76	1174.46	1111.54	999.371	1246.8	19.1146	83.1306	20.6704	24.2834	0.232901	0.153463	0.319137	0.00726263	0.145731	0.00016586
beat-Ia	chr2L	0	0	0	0	0.995899	0	0	1.01088	0	0	0	0	0	0.331966	0.336961	0	0	0.574983	0.583634	0	#NUM!	-0.0215447	#NUM!	NA	NA	NA
beat-Ib	chr2L	105.051	77.1031	94.2905	62.915	55.7704	43.236	47.5224	54.5877	58.2409	52.9635	39.3581	74.3069	92.1481	53.9738	53.4503	55.5428	14.0964	9.96178	5.44898	17.6166	0.785755	0.0140591	0.0554014	0.0104818	0.992995	0.933871
beat-Ic	chr2L	5.77201	7.94877	8.57186	8.53085	7.96719	12.0658	2.37612	1.01088	2.81811	0.767587	2.87986	1.06153	7.43088	9.5213	2.06837	1.56966	1.47002	2.22159	0.942098	1.14415	1.84504	2.20266	-0.398044	0.0815601	0.0381841	0.857337
beat-IIa	chr3R	1.1544	0	0	0	0	0	0	0	0	0	0	0	0.384801	0	0	0	0.666495	0	0	0	#DIV/0!	#DIV/0!	#DIV/0!	NA	NA	NA
beat-IIb	chr3R	6.92642	7.94877	9.64335	0	4.9795	0	7.12837	5.05442	2.81811	3.83793	0.959954	4.24611	8.17284	1.65983	5.0003	3.01467	1.37226	2.87491	2.15564	1.7911	0.708824	-1.59098	-0.730016	0.44912	0.43714	0.648406
beat-IIIa	chr2L	0	0	0	0	0	0	0	0	0	0	0	0	0	0	0	0	0	0	0	0	#DIV/0!	#DIV/0!	#DIV/0!	NA	NA	NA
beat-IIIb	chr2L	0	0	0	1.06636	0.995899	1.00549	0	0	0	0	0	3.18458	0	1.02258	0	1.06153	0	0.0382123	0	1.83862	#DIV/0!	#DIV/0!	#DIV/0!	NA	NA	NA
beat-IIIc	chr2L	38.0953	31.0002	51.4312	29.858	35.8524	35.1921	112.866	135.458	124.936	65.2449	73.9165	67.9377	40.1756	33.6341	124.42	69.033	10.3731	3.28688	11.3051	4.43836	-1.63083	-1.88722	-0.849861	4.82442e-11	3.77029e-13	0.000564471
beat-IV	chr3R	0	0	0	0	0.995899	0	0	2.02177	0	0	0	0	0	0.331966	0.673922	0	0	0.574983	1.16727	0	#NUM!	-1.02154	#NUM!	NA	NA	NA
beat-Va	chr3R	0	0	0	0	0	0	0	0	0	0	0	0	0	0	0	0	0	0	0	0	#DIV/0!	#DIV/0!	#DIV/0!	NA	NA	NA
beat-Vb	chr3R	1.1544	0	0	0	0	0	0	0	0	0	0	0	0.384801	0	0	0	0.666495	0	0	0	#DIV/0!	#DIV/0!	#DIV/0!	NA	NA	NA
beat-Vc	chr3R	0	0	0	0	0	1.00549	0	0	0	0	0	0	0	0.335162	0	0	0	0.580518	0	0	#DIV/0!	#DIV/0!	#DIV/0!	NA	NA	NA
beat-VI	chr3R	2.30881	5.56414	4.28593	1.06636	2.9877	2.01097	1.18806	3.03265	7.51495	0	0	0	4.05296	2.02168	3.91189	0	1.64012	0.960716	3.2538	0	0.0511102	-0.952313	#NUM!	0.96729	0.580167	0.0941736
beat-VII	chr3R	0	1.58975	0	0	2.9877	1.00549	4.75224	2.02177	0	0	0	0	0.529918	1.33106	2.258	0	0.917845	1.52022	2.38491	0	-2.09121	-0.762471	#NUM!	NA	NA	0.304307
beg	chr3L	1187.88	1423.62	1185.06	992.777	994.903	950.185	1043.12	883.512	1068.06	1196.67	1131.79	1200.59	1265.52	979.289	998.231	1176.35	136.928	25.2265	100.129	38.6405	0.342287	-0.0276393	0.236868	0.0021917	0.897004	0.0527143
bel	chr3R	15158.5	12385.8	15589	16335.5	15509.1	18434.6	12812.1	14750.8	15021.5	12640.6	10871.5	13987.7	14377.7	16759.7	14194.8	12499.9	1738.48	1508.17	1205.09	1562.88	0.0184779	0.239641	-0.183438	0.919708	0.130616	0.226472
Bem46	chr2L	1578.07	1433.96	1599.72	1546.22	1452.02	1382.54	1395.97	1471.85	1314.18	1595.81	1585.84	1394.85	1537.25	1460.26	1394	1525.5	90.1067	82.146	78.8527	113.26	0.141123	0.0669969	0.130054	0.189043	0.659607	0.253246
ben	chrX	8359.03	9406.57	7540.03	6752.17	6842.82	6632.19	6749.38	6844.69	7178.66	6844.57	6665.92	6949.82	8435.21	6742.39	6924.24	6820.1	935.602	105.654	225.427	143.52	0.284768	-0.0383952	-0.0218626	0.00115096	0.797776	0.872004
Best1	chr3R	1691.2	1462.57	1690.8	2209.49	2287.58	2466.46	2391.57	2456.45	2106.07	1918.2	1887.27	1882.09	1614.86	2321.18	2318.03	1895.85	131.882	131.739	186.408	19.5256	-0.52149	0.00195931	-0.290051	2.62921e-08	0.992768	0.00382287
Best2	chr3L	2592.79	2584.94	2666.92	2677.62	2351.32	3077.8	2940.45	2650.54	2711.02	2392.57	2004.38	2255.74	2614.88	2702.24	2767.34	2217.57	45.2371	363.865	152.942	196.888	-0.0817513	-0.0343393	-0.319521	0.548399	0.869697	0.00725988
Best3	chr3L	2.30881	1.58975	1.07148	2.13271	0	0	0	1.01088	1.87874	1.53517	4.79977	2.12305	1.65668	0.710904	0.963207	2.81933	0.62137	1.23132	0.940276	1.74012	0.782377	-0.438192	1.54944	0.770472	NA	0.417886
Best4	chr3L	0	0	0	0	0	0	0	0	0	0	0	0	0	0	0	0	0	0	0	0	#DIV/0!	#DIV/0!	#DIV/0!	NA	NA	NA
Bet1	chr3L	1112.84	988.827	900.046	747.515	805.682	679.709	734.222	687.401	759.95	1043.92	1030.99	1028.62	1000.57	744.302	727.191	1034.51	106.884	63.048	36.7821	8.23367	0.46042	0.0335552	0.508541	2.62432e-05	0.871661	2.9905e-06
Bet3	chr3L	1509.96	1573.06	1421.86	1250.84	1327.53	1330.26	1883.08	1649.76	1647.65	1402.38	1343.94	1219.69	1501.63	1302.88	1726.83	1322	75.9452	45.0892	135.317	93.297	-0.201601	-0.406427	-0.3854	0.0456795	4.74265e-05	6.1202e-05
Bet5	chr3R	705.34	722.543	668.605	604.624	581.605	540.952	622.544	604.508	535.44	666.265	659.489	666.639	698.829	575.727	587.498	664.131	27.5519	32.2402	45.9759	4.02469	0.250358	-0.029198	0.176885	0.0160536	0.889087	0.121591
beta-Man	chr3R	3725.26	4173.1	3890.56	3761.04	3817.28	3804.76	2399.88	2765.78	2903.59	4267.01	3921.41	3587.96	3929.64	3794.36	2689.75	3925.46	226.467	29.53	260.317	339.544	0.546924	0.496385	0.545391	1.42373e-08	9.12594e-07	1.64228e-08
beta-PheRS	chr3R	4151.23	4352.75	4597.73	4567.2	3983.6	4684.57	3302.81	3595.71	3937.84	4545.65	4812.25	4976.44	4367.24	4411.79	3612.12	4778.11	223.604	375.439	317.831	217.415	0.273875	0.288518	0.403595	0.00630709	0.00857442	3.95793e-05
beta-Spec	chrX	3278.5	2931.51	3361.24	3573.36	3290.45	4092.33	4237.81	4445.86	4853.72	2990.52	2857.78	3525.33	3190.42	3652.05	4512.47	3124.54	228.008	406.691	313.308	353.38	-0.500171	-0.305211	-0.530271	1.62839e-05	0.0233032	5.32534e-06
beta'COP	chr2L	6825.98	6866.15	6688.2	6564.49	5882.78	7158.06	6274.15	5646.79	6317.26	6222.82	5944.04	7119.66	6793.44	6535.11	6079.4	6428.84	93.3305	638.151	375.268	614.292	0.160214	0.104282	0.0806294	0.146169	0.473157	0.54284
beta3GalTII	chr2R	995.095	1185.96	910.761	718.724	829.584	767.187	889.858	894.632	942.187	928.78	857.239	899.113	1030.6	771.832	908.892	895.044	140.992	55.5758	28.933	35.9435	0.181309	-0.235823	-0.0221506	0.149903	0.0996523	0.908328
beta4GalNAcTA	chr2R	900.434	765.466	918.261	1053.56	1023.78	1353.39	1185.69	1112.98	1070.88	1280.33	1161.54	1160.25	861.387	1143.58	1123.18	1200.71	83.5466	182.309	58.0778	68.9604	-0.382859	0.0259602	0.0962942	0.00388705	0.91761	0.567409
beta4GalNAcTB	chr3R	2014.43	2335.35	1994.03	1731.76	1868.31	1793.79	1860.5	1909.56	2085.4	1608.86	1582.96	1389.54	2114.6	1797.95	1951.82	1527.12	191.442	68.3676	118.254	119.852	0.115567	-0.118465	-0.354006	0.309084	0.395766	0.00061875
beta4GalT7	chr3R	2097.55	2446.63	1982.24	1954.63	1969.89	1785.75	1969.81	1938.87	2137.07	1973.47	1892.07	1920.3	2175.47	1903.42	2015.25	1928.61	241.802	102.196	106.624	41.329	0.110373	-0.0823625	-0.0633943	0.322419	0.57802	0.637604
betaCOP	chrX	7009.53	6982.99	6768.56	6245.65	5728.41	6822.23	5425.88	5397.11	6642.28	6090.03	6026.59	6947.69	6920.36	6265.43	5821.75	6354.77	132.133	547.178	710.742	514.463	0.249394	0.10596	0.126387	0.0289628	0.507434	0.34811
betaggt-I	chr2L	2323.81	2297.19	2124.75	1851.19	1902.17	1886.29	2037.53	2013.68	1921.01	1918.97	1833.51	1731.35	2248.59	1879.89	1990.74	1827.94	108.067	26.0842	61.5521	93.9319	0.175714	-0.082659	-0.123082	0.0251624	0.447931	0.168411
betaggt-II	chr2L	561.04	592.183	582.887	502.254	505.917	521.848	508.49	431.647	476.26	510.445	455.978	513.779	578.703	510.006	472.133	493.401	15.9877	10.4176	38.5875	32.4517	0.293632	0.111323	0.0635682	0.00766968	0.473157	0.6628
betaGlu	chr3R	947.764	1014.26	907.546	943.725	1090.51	904.939	887.482	825.892	812.554	698.504	709.406	674.07	956.525	979.724	841.976	693.993	53.895	97.8832	39.9694	18.095	0.184023	0.218597	-0.278857	0.0933994	0.0759479	0.0128479
betaNACtes1	chrX	1.1544	0	1.07148	0	0	0	0	0	0	0	0	0	0.741962	0	0	0	0.643894	0	0	0	#DIV/0!	#DIV/0!	#DIV/0!	NA	NA	NA
betaNACtes2	chrX	0	0	0	0	0	0	0	0	0.939369	0	0	0	0	0	0.313123	0	0	0	0.542345	0	#NUM!	#NUM!	#NUM!	NA	NA	NA
betaNACtes3	chrX	0	0	1.07148	0	0	1.00549	0	2.02177	2.81811	1.53517	0	0	0.357161	0.335162	1.61329	0.511724	0.618621	0.580518	1.45278	0.886333	-2.17536	-2.26707	-1.65657	NA	NA	NA
betaNACtes4	chrX	0	0	0	0	0	0	0	0	0	0	0	0	0	0	0	0	0	0	0	0	#DIV/0!	#DIV/0!	#DIV/0!	NA	NA	NA
betaNACtes6	chrX	0	0	0	1.06636	0	0	0	0	0	0	0	0	0	0.355452	0	0	0	0.615661	0	0	#DIV/0!	#DIV/0!	#DIV/0!	NA	NA	NA
betaTry	chr2R	0	0	0	0	0	0	0	0	0	0	0	0	0	0	0	0	0	0	0	0	#DIV/0!	#DIV/0!	#DIV/0!	NA	NA	NA
betaTub56D	chr2R	76639.6	90445.9	77017.1	72402.4	67670.4	71019.6	60054.1	61267.6	67657.1	80345.6	78292.9	82056	81367.5	70364.1	62993	80231.5	7864.32	2433.15	4084.61	1884.15	0.369263	0.159649	0.348979	1.70079e-05	0.138046	6.49128e-05
betaTub60D	chr2R	4122.37	3780.43	4219.5	4240.9	3500.59	4283.38	4176.04	3662.43	4651.76	3377.38	2899.06	3943.57	4040.77	4008.29	4163.41	3406.67	230.627	440.194	494.784	522.871	-0.0431349	-0.0547791	-0.289402	0.811276	0.81924	0.0550938
betaTub85D	chr3R	9.23522	12.718	9.64335	5.33178	7.96719	9.04939	5.94031	2.02177	8.45432	21.4924	24.9588	19.1075	10.5322	7.44945	5.47213	21.8529	1.90395	1.91212	3.24173	2.94227	0.944632	0.445031	1.99765	0.250282	0.747567	0.00125194
betaTub97EF	chr3R	685.715	596.158	668.605	815.762	554.716	917.004	516.807	393.234	494.108	449.806	407.981	554.117	650.159	762.494	468.049	470.634	47.5429	186.926	65.7789	75.2618	0.474132	0.704065	0.00794591	0.019374	0.000764747	0.983716
bft	chr2L	0	0	0	0	0	0	0	0	0	0	0	0	0	0	0	0	0	0	0	0	#DIV/0!	#DIV/0!	#DIV/0!	NA	NA	NA
BG642163	chr2L	0	0	0	0	0	0	0	0	0	0	0	0	0	0	0	0	0	0	0	0	#DIV/0!	#DIV/0!	#DIV/0!	NA	NA	NA
BG642167	chr3R	0	0	0	0	0	0	0	0	0	0	0	0	0	0	0	0	0	0	0	0	#DIV/0!	#DIV/0!	#DIV/0!	NA	NA	NA
BG642312	chr3L	5.77201	11.1283	8.57186	8.53085	7.96719	2.01097	8.31643	5.05442	3.75748	3.83793	6.71968	7.43069	8.49072	6.16967	5.70944	5.9961	2.67905	3.61255	2.349	1.90254	0.572537	0.111844	0.0706752	0.511368	0.941341	0.965171
Bgb	chr3L	1388.75	1461.78	1335.07	1098.35	1222.96	1015.54	1296.17	1267.65	1270.97	1335.6	1536.89	1278.08	1395.2	1112.28	1278.26	1383.52	63.6012	104.411	15.6006	135.896	0.126285	-0.200659	0.114161	0.281833	0.12261	0.376332
bgcn	chr2R	27.7057	27.8207	32.1445	28.7916	53.7786	36.1975	28.5135	32.3483	26.3023	18.4221	12.4794	31.8458	29.2236	39.5892	29.0547	20.9158	2.53021	12.8341	3.05908	9.9211	0.00836353	0.446337	-0.47418	0.989911	0.432546	0.374665
bgm	chr2L	7794.53	8154.64	8068.27	5798.84	5920.62	6514.55	5604.08	6349.36	6547.4	8179.4	8033.86	8773.52	8005.81	6078.01	6166.95	8328.93	188.006	382.932	497.411	391.846	0.376491	-0.0209589	0.433574	7.52724e-06	0.895573	2.16274e-07
BHD	chr3L	397.114	364.054	345.018	428.675	441.183	443.42	348.102	400.31	409.565	384.561	350.383	377.904	368.729	437.759	385.992	370.949	26.3612	7.94637	33.1387	18.119	-0.0660127	0.181566	-0.0573499	0.63759	0.249906	0.728495
bi	chrX	0	0.794877	0	7.46449	13.9426	9.04939	3.56418	7.07618	5.63622	0	0	0	0.264959	10.1522	5.42553	0	0.458922	3.37691	1.76545	0	-4.35592	0.903951	#NUM!	0.0449169	0.302012	0.0345604
BI-1	chr3L	4659.17	5456.03	4629.88	3981.77	3675.86	3541.33	5135.99	3911.11	4539.03	4191.02	4209.4	4489.2	4915.03	3732.99	4528.71	4296.54	468.755	225.711	612.506	167.099	0.118099	-0.278769	-0.0759247	0.36961	0.0375063	0.625807
bib	chr2L	71.573	46.8977	76.0753	141.825	130.463	152.834	108.114	106.143	148.42	86.7373	84.476	139.06	64.8487	141.707	120.892	103.424	15.7081	11.1861	23.8604	30.882	-0.898573	0.229194	-0.225144	0.00148372	0.571678	0.503167
bic	chr2R	41640.5	44760.3	37935.9	36601.6	34427.2	33413.3	41677.2	33945.5	37182.1	35617.6	34155.2	36706.5	41445.5	34814.1	37601.6	35493.1	3416.4	1628.95	3882.9	1280.23	0.140423	-0.111123	-0.0832554	0.189793	0.413419	0.507942
BicC	chr2L	0	2.38463	7.50038	4.26542	0.995899	5.02744	10.6926	3.03265	0.939369	4.60552	5.75973	3.18458	3.295	3.42959	4.88819	4.51661	3.83217	2.1418	5.13453	1.28987	-0.56902	-0.511266	-0.11406	0.734279	0.822141	0.97135
BicD	chr2L	7305.06	6397.96	7368.59	7904.9	8618.51	8971.96	7647.55	9716.61	8441.17	8164.05	8189.37	7353.2	7023.87	8498.46	8601.78	7902.21	542.981	543.569	1043.84	475.624	-0.292368	-0.0174339	-0.122379	0.00875812	0.936188	0.361109
bif	chrX	13100.2	10990.8	13462.1	13741.1	14944.5	16130	12314.3	14792.3	14482.3	14582.6	13189.8	13538.7	12517.7	14938.5	13862.9	13770.4	1334.68	1194.49	1350.11	724.739	-0.147264	0.107806	-0.00966448	0.235235	0.506152	0.958103
BigH1	chr3R	13974	17395.1	13044.2	12663	13004.5	9874.89	15614.7	12984.8	13004.6	14148.9	13943.3	13468.7	14804.5	11847.4	13868	13853.6	2291.21	1716.79	1512.68	348.893	0.0942677	-0.227188	-0.00149875	0.57526	0.197143	0.99675
bigmax	chr3R	681.098	725.723	609.674	549.173	579.613	594.243	521.559	578.225	574.894	686.99	534.695	594.455	672.165	574.343	558.226	605.38	58.5378	22.9924	31.7983	76.7332	0.267965	0.0410637	0.116991	0.0429214	0.863081	0.461306
Bili	chr3R	3.46321	1.58975	3.21445	4.26542	6.97129	0	0	3.03265	4.69685	3.07035	4.79977	4.24611	2.7558	3.74557	2.5765	4.03874	1.01746	3.5146	2.38142	0.883164	0.0970612	0.539774	0.648494	0.987664	0.824098	0.734937
bin	chr3L	3.46321	0.794877	3.21445	0	1.9918	0	0	1.01088	0	0	0.959954	2.12305	2.49084	0.663933	0.336961	1.02767	1.47401	1.14997	0.583634	1.06315	2.88598	0.978455	1.60872	NA	NA	0.778495
Bin1	chr3R	1533.05	1778.14	1472.22	1404.39	1313.59	1216.64	1817.73	1548.67	1640.14	1423.87	1450.49	1386.35	1594.47	1311.54	1668.85	1420.24	161.946	93.8924	136.809	32.2224	-0.0657779	-0.347591	-0.232719	0.629246	0.00299895	0.0467457
bin3	chr2R	6094.09	5060.98	6209.24	7105.13	7255.13	8201.76	7474.09	8563.19	7798.64	6202.1	6134.11	6544.31	5788.11	7520.67	7945.31	6293.51	632.335	594.588	559.166	219.849	-0.457012	-0.079242	-0.336239	7.91612e-06	0.618317	0.00167903
bip1	chr3L	2103.32	1833.78	1823.66	2034.61	2182.02	1974.78	1669.23	1885.3	1614.78	2268.99	2103.26	2084.84	1920.26	2063.8	1723.1	2152.36	158.62	106.659	143.081	101.419	0.156292	0.260297	0.320914	0.149822	0.0209276	0.00150163
bip2	chr4	5613.86	4267.69	5884.59	8617.22	8474.11	8707.52	6970.36	8802.77	6814.18	8537.87	9754.1	7017.75	5255.38	8599.62	7529.1	8436.57	866.005	117.698	1105.79	1370.98	-0.518683	0.191794	0.164179	0.000873083	0.362399	0.392848
Bka	chr2L	1574.61	1646.19	1345.78	1144.2	1096.49	1023.59	1107.27	908.784	1013.58	1239.65	1335.3	1188.91	1522.19	1088.09	1009.88	1254.62	156.912	60.7435	99.2963	74.332	0.591969	0.107616	0.313068	1.03792e-07	0.523108	0.00978259
blanks	chr3L	15.0072	15.1027	16.0722	8.53085	0	4.02195	4.75224	3.03265	4.69685	3.83793	3.83982	2.12305	15.394	4.18427	4.16058	3.26693	0.589273	4.26774	0.977209	0.99063	1.88752	0.00818958	-0.348847	0.0115868	0.999907	0.846028
Blimp-1	chr3L	8.08082	3.97438	9.64335	13.8626	15.9344	5.02744	29.7015	25.2721	21.6055	6.90828	9.59954	7.43069	7.23285	11.6081	25.5264	7.9795	2.92807	5.79244	4.054	1.4271	-1.81935	-1.13685	-1.67762	0.00159894	0.0689628	0.00417181
Blm	chr3R	2276.48	1962.55	2577.99	3284.38	3678.85	3826.88	2901.25	3790.81	3450.3	2700.37	2893.3	2589.06	2272.34	3596.7	3380.79	2727.58	307.74	280.428	448.839	153.933	-0.57318	0.0893163	-0.309738	7.97643e-06	0.663917	0.0275805
Blos1	chr2R	372.872	441.952	383.591	301.779	326.655	291.591	286.323	329.548	290.265	338.506	371.502	339.689	399.471	306.675	302.045	349.899	37.1771	18.0373	23.8994	18.7185	0.403328	0.0219457	0.212173	0.00233852	0.937277	0.171011
Blos2	chr3L	446.754	469.772	392.163	335.902	381.429	287.569	302.956	303.265	345.688	293.986	323.505	287.674	436.23	334.967	317.303	301.721	39.8607	46.937	24.5827	19.127	0.459227	0.0781584	-0.0726435	0.00189247	0.755744	0.72574
Blos3	chr3L	468.687	558.004	427.522	406.282	336.614	349.91	482.353	412.44	542.955	413.729	425.26	489.364	484.738	364.268	479.25	442.784	66.7052	36.9869	65.3129	40.7491	0.0164268	-0.395775	-0.114173	0.929348	0.030035	0.571976
Blos4	chr3L	572.584	738.441	616.103	612.088	634.388	543.969	902.927	670.216	764.647	725.369	807.322	692.116	642.376	596.815	779.263	741.602	85.9932	47.1048	117.042	59.2936	-0.278693	-0.384827	-0.0714647	0.0796096	0.0228168	0.738847
blot	chr3L	4288.61	3950.54	4569.88	5144.1	5303.16	5536.21	4608.49	5037.23	4547.49	5309.4	5761.65	5022.08	4269.67	5327.83	4731.07	5364.38	310.102	197.216	266.893	372.834	-0.148041	0.171381	0.181244	0.122914	0.113694	0.064636
blow	chr2R	454.835	546.08	541.099	602.491	516.872	577.15	485.917	514.54	542.016	455.179	393.581	464.949	514.005	565.504	514.158	437.903	51.3033	43.9816	28.0515	38.6933	-0.000429104	0.137327	-0.231599	0.995612	0.448644	0.105012
blp	chr3R	1474.17	1733.63	1396.14	1068.49	1109.43	920.021	1047.87	1011.89	1087.79	1152.92	1151.95	1152.82	1534.65	1032.65	1049.18	1152.56	176.683	99.6623	37.9648	0.53423	0.548638	-0.0229213	0.135573	3.87485e-07	0.91715	0.318801
blw	chr2R	47798	51423	52833.8	51305.6	47572.1	56932.7	35799.8	40694.1	47036.1	52451.5	51489.1	54791.8	50684.9	51936.8	41176.7	52910.8	2597.72	4712.11	5633.65	1698.58	0.299729	0.334929	0.361734	0.00798462	0.00623426	0.00144916
bma	chr3L	4.61761	6.35901	1.07148	3.19907	4.9795	3.01646	22.5732	15.1632	11.2724	0	0	0	4.01604	3.73168	16.3363	0	2.69461	1.08449	5.74096	0	-2.02424	-2.13018	#NUM!	0.00465747	0.00685968	4.84259e-06
Bmcp	chr3L	1914	1903.73	2048.68	1877.85	1825.48	1786.75	1934.16	1918.66	1955.77	2485.45	2248.21	2090.15	1955.47	1830.03	1936.2	2274.6	80.883	45.7207	18.6385	198.966	0.0142895	-0.0813583	0.232389	0.907068	0.51231	0.00880625
bmm	chr3L	3006.06	2890.17	3084.8	3066.84	3231.69	3092.88	2373.75	2724.33	2664.99	3692.09	3333.92	3166.53	2993.68	3130.47	2587.69	3397.52	97.9031	88.6228	187.64	268.488	0.210255	0.274715	0.392816	0.0229195	0.00507895	7.34943e-06
bnb	chrX	307.071	417.31	440.38	493.723	381.429	398.173	241.176	167.807	200.086	280.169	216.95	294.043	388.254	424.442	203.023	263.721	71.2461	60.5804	36.773	41.0945	0.935357	1.06392	0.377368	2.69478e-06	1.93212e-07	0.104466
bnk	chr3R	0	0	0	0	0	0	2.37612	12.1306	3.75748	6.90828	0	1.06153	0	0	6.08807	2.6566	0	0	5.27837	3.72012	#NUM!	#NUM!	-1.1964	0.0437349	0.0764595	0.388079
bnl	chr3R	35.7865	20.6668	45.0023	23.4598	26.8893	35.1921	66.5314	51.555	50.7259	12.2814	11.5195	40.338	33.8185	28.5137	56.2708	21.3796	12.2865	6.03244	8.89563	16.4229	-0.734573	-0.98073	-1.39615	0.139109	0.0850989	0.00607674
BobA	chr3L	3.46321	4.76926	0	0	4.9795	0	2.37612	3.03265	5.63622	0	0	0	2.74416	1.65983	3.68166	0	2.4646	2.87491	1.72423	0	-0.423995	-1.14932	#NUM!	0.804824	NA	0.212788
boca	chr2R	1890.91	2066.68	1643.66	1501.43	1478.91	1344.34	1796.35	1402.1	1711.53	1574.32	1430.33	1612.46	1867.08	1441.56	1636.66	1539.04	212.517	84.9464	207.517	96.0535	0.190032	-0.183124	-0.088725	0.159498	0.262217	0.596071
bocks	chr3R	1451.08	1360.03	1478.65	1195.38	1264.79	1157.32	1066.88	1229.23	1129.12	1549.76	1586.8	1406.52	1429.92	1205.83	1141.74	1514.36	62.0734	54.4942	81.9103	95.2101	0.324696	0.0787872	0.407469	0.000587138	0.58305	1.12306e-05
BOD1	chr3R	1630.02	1287.7	1754.02	1952.5	2055.54	2224.14	1676.35	2239.11	2238.52	2247.49	2147.42	1999.92	1557.24	2077.39	2051.33	2131.61	241.526	137.132	324.735	124.543	-0.397561	0.0182157	0.0553864	0.00700582	0.952202	0.799284
boi	chrX	1812.41	1805.96	2034.75	2289.47	2563.44	2231.18	2334.54	2703.1	2366.27	1878.28	2205.02	1956.39	1884.37	2361.36	2467.97	2013.23	130.267	177.419	204.246	170.62	-0.389241	-0.0637061	-0.293813	0.000241111	0.709101	0.00858298
boil	chrX	0	0	0	0	0	0	0	0	0	0	0	0	0	0	0	0	0	0	0	0	#DIV/0!	#DIV/0!	#DIV/0!	NA	NA	NA
bol	chr3L	335.931	294.104	339.66	372.158	326.655	341.866	331.469	346.733	278.053	272.493	212.15	278.12	323.232	346.893	318.752	254.254	25.2939	23.1645	36.0627	36.5719	0.0201362	0.122057	-0.326161	0.929799	0.600269	0.0621401
boly	chr2R	0	0	0	0	0	0	0	0	0	0	0	0	0	0	0	0	0	0	0	0	#DIV/0!	#DIV/0!	#DIV/0!	NA	NA	NA
bon	chr3R	4006.93	3332.92	4280.57	4754.88	5384.83	5642.79	4899.56	6127.97	5333.74	4405.18	4459.95	4367.12	3873.47	5260.83	5453.76	4410.75	487.72	456.758	622.938	46.6629	-0.493623	-0.0519594	-0.306227	3.22802e-05	0.801734	0.016751
bond	chr3R	3556.71	3162.02	3413.75	2888.76	2045.58	3470.94	2630.37	1654.82	2149.28	1933.55	1907.43	2704.77	3377.49	2801.76	2144.82	2181.92	199.829	716.654	487.791	452.993	0.655096	0.385476	0.0247395	0.00200321	0.137872	0.943791
bonsai	chr2R	2328.43	2443.45	2282.26	2144.44	1984.83	1848.09	1568.24	1609.33	1748.17	2153.08	2120.54	2272.73	2351.38	1992.45	1641.91	2182.12	83.0107	148.325	94.2848	80.1422	0.518132	0.279169	0.410352	5.80786e-10	0.00368942	1.75163e-06
bor	chr3R	3157.29	2723.25	3190.88	2646.7	2419.04	3116	2639.87	2293.69	2516.57	2115.47	2393.17	2899.03	3023.81	2727.25	2483.38	2469.22	260.831	355.397	175.46	397.279	0.284061	0.135141	-0.00824801	0.0536882	0.50451	0.970798
bora	chr3L	2107.94	2212.14	2155.82	1939.7	2288.58	1983.83	1738.13	2227.99	2022.46	2759.47	2820.35	2367.21	2158.64	2070.7	1996.19	2649.01	52.1585	189.971	245.981	245.939	0.112867	0.0528675	0.4082	0.413616	0.796721	0.000671986
borr	chr2L	4764.22	5177.83	4577.38	3736.51	4029.41	3466.92	3647.35	4327.59	4103.16	5079.89	5234.63	4555.01	4839.81	3744.28	4026.03	4956.51	307.28	281.325	346.619	356.212	0.26559	-0.104671	0.299965	0.0109388	0.47328	0.00471278
boss	chr3R	0	0	0	0	0	0	0	1.01088	0	0	0	0	0	0	0.336961	0	0	0	0.583634	0	#NUM!	#NUM!	#NUM!	NA	NA	NA
botv	chr2R	458.298	333.053	443.594	504.386	521.851	696.803	501.362	688.411	543.895	499.699	540.454	503.164	411.648	574.347	577.889	514.439	68.4612	106.409	98.049	22.5964	-0.489381	-0.00887141	-0.167793	0.00778497	0.982745	0.458777
bou	chrX	596.826	578.67	577.529	494.789	448.155	483.639	382.556	374.027	389.838	371.512	348.463	468.133	584.342	475.528	382.14	396.036	10.8266	24.3525	7.91391	63.4926	0.612711	0.315427	0.0515302	1.19654e-06	0.0380896	0.811693
bowl	chr2L	267.821	190.77	244.298	248.461	215.114	300.641	217.415	164.774	199.146	251.001	210.23	257.951	234.297	254.739	193.778	239.727	39.4871	43.1074	26.728	25.7807	0.273928	0.394609	0.306986	0.22464	0.0995448	0.181142
BoYb	chr3L	1019.34	884.698	1158.27	1321.21	1307.62	1356.4	1322.31	1576.98	1454.14	1498.33	1714.48	1596.54	1020.77	1328.41	1451.14	1603.11	136.793	25.1768	127.359	108.225	-0.507534	-0.12749	0.143686	1.20653e-05	0.439347	0.313976
br	chrX	666.09	572.311	720.037	954.389	785.764	1146.26	755.607	716.716	710.163	561.873	588.452	703.792	652.813	962.136	727.495	618.039	74.7523	180.37	24.5648	75.444	-0.156269	0.403303	-0.23524	0.387845	0.0239781	0.199403
Br140	chr2R	3563.64	2788.43	3549.82	4240.9	4600.06	4988.22	4467.11	5813.59	5203.17	4108.89	4330.35	3894.74	3300.63	4609.73	5161.29	4111.33	443.634	373.756	674.216	217.816	-0.64499	-0.16305	-0.328126	3.28108e-07	0.351176	0.0173522
brat	chr2L	8705.35	6954.38	8970.46	11046.4	12497.5	13134.7	12657.6	15008.6	12799.8	9803.62	10056.5	9808.51	8210.06	12226.2	13488.7	9889.54	1095.5	1070.27	1318.2	144.6	-0.716284	-0.141773	-0.447774	2.63686e-10	0.38084	0.000165615
Brca2	chr2R	1217.89	931.596	1248.28	1643.25	1692.03	1617.83	1302.12	1823.63	1514.26	1658.75	1839.27	1455.35	1132.59	1651.04	1546.67	1651.13	174.727	37.7093	262.265	192.073	-0.449541	0.094208	0.094285	0.00373215	0.701311	0.651434
Brd	chr3L	0	4.76926	0	0	2.9877	0	2.37612	3.03265	4.69685	0.767587	0.959954	0	1.58975	0.995899	3.36854	0.575847	2.75353	1.72495	1.19627	0.507889	-1.08332	-1.75805	-2.54837	0.541954	NA	0.293149
Brd8	chr3R	1048.2	1087.39	1083.27	1123.94	1120.39	1112.07	1058.56	1250.46	1233.39	1195.13	1210.5	1128.4	1072.95	1118.8	1180.81	1178.01	21.5376	6.09243	106.209	43.645	-0.138185	-0.0778217	-0.00341655	0.156832	0.550745	0.976575
Bre1	chr3L	3180.38	2766.97	3486.61	3982.84	4413.83	4717.75	3539.23	4787.54	4387.79	4189.49	4233.4	3938.26	3144.65	4371.47	4238.19	4120.38	361.148	369.28	637.459	159.24	-0.430549	0.0446702	-0.0406697	0.000930509	0.84932	0.83861
Brf	chr3R	739.972	657.363	792.897	875.478	886.35	1046.71	715.213	840.044	794.706	874.281	902.357	757.93	730.078	936.18	783.321	844.856	68.3068	95.8778	63.1896	76.5777	-0.101554	0.257183	0.109102	0.489574	0.0930393	0.503944
brk	chrX	311.689	240.053	297.872	266.589	242.004	362.981	231.672	197.122	188.813	242.557	175.672	301.474	283.205	290.524	205.869	239.901	38.0037	63.9419	22.7288	62.9431	0.460117	0.496932	0.220711	0.058228	0.0672675	0.447508
brm	chr3L	2692.07	2443.45	2900.5	3636.27	4047.33	4182.83	3503.59	4819.89	4314.52	3561.6	3889.73	3510.47	2678.67	3955.48	4212.67	3653.94	228.821	284.62	664.034	205.802	-0.653215	-0.0908824	-0.205283	9.02589e-08	0.639188	0.153416
Brms1	chrX	2013.28	1728.86	1945.81	1994.09	2251.73	2086.39	1479.14	1781.18	1643.9	2174.57	2101.34	1840.69	1895.98	2110.73	1634.74	2038.87	148.614	130.535	151.228	175.491	0.213888	0.368686	0.31871	0.0711784	0.00215647	0.00578449
brn	chrX	562.194	626.363	526.098	468.13	548.74	545.98	672.443	552.953	682.921	562.641	596.132	592.332	571.552	520.95	636.106	583.702	50.7832	45.7642	72.2026	18.3377	-0.154383	-0.288121	-0.124036	0.293979	0.0587115	0.43608
Bro	chr3L	2.30881	0	1.07148	0	0	0	0	0	0.939369	0	0	0	1.12676	0	0.313123	0	1.15539	0	0.542345	0	1.84738	#NUM!	#NUM!	NA	NA	NA
brp	chr2R	17.316	20.6668	22.5011	12.7963	12.9467	26.1427	16.6329	16.1741	12.2118	9.21104	3.83982	8.49222	20.1613	17.2952	15.0063	7.18102	2.62925	7.66249	2.43092	2.91581	0.426026	0.204808	-1.0633	0.46804	0.816102	0.149224
bru1	chr2L	27998.9	25063.3	29849.4	37260.6	33176.4	38500.1	39713.3	38207.3	33795.7	31405	30574.5	32589.9	27637.2	36312.4	37238.8	31523.2	2413.47	2785.65	3075.42	1012.88	-0.430196	-0.036345	-0.240393	9.6457e-06	0.836364	0.0236215
bru2	chr2L	434.055	391.079	506.812	600.358	509.9	574.133	468.096	470.061	462.17	502.002	515.495	453.272	443.982	561.464	466.776	490.256	58.5011	46.5408	4.10793	32.7323	-0.0722274	0.266465	0.0708075	0.641242	0.0863621	0.689624
bru3	chr3L	12.6984	15.8975	16.0722	31.9907	48.7991	15.0823	71.2837	100.077	68.574	17.6545	18.2391	13.7999	14.8894	31.9573	79.9784	16.5645	1.89945	16.8584	17.459	2.41203	-2.42532	-1.32346	-2.27152	5.3188e-09	0.00159729	2.73106e-08
Bruce	chr3R	6498.13	5537.11	6632.48	8765.45	8714.12	10602.9	8874.82	10312	10040	8532.49	8765.34	8998.56	6222.57	9360.81	9742.27	8765.47	597.417	1075.96	763.452	233.036	-0.646747	-0.0576251	-0.152427	1.08204e-09	0.749927	0.240788
brun	chr2L	2991.06	2300.37	2950.86	3316.37	3317.34	4035.02	3459.63	3887.86	3678.57	3365.87	3330.08	3309.84	2747.43	3556.24	3675.35	3335.26	387.685	414.634	214.129	28.3702	-0.4198	-0.0475294	-0.140082	0.000555448	0.823198	0.345818
brv1	chr3L	0	3.17951	0	2.13271	1.9918	0	1.18806	0	2.81811	0.767587	1.91991	1.06153	1.05984	1.37484	1.33539	1.24967	1.83569	1.19273	1.41482	0.598758	-0.33342	0.0419995	-0.0957089	NA	NA	0.971118
brv2	chr3L	0	0	0	0	0	0	0	0	0	0	0.959954	0	0	0	0	0.319985	0	0	0	0.55423	#DIV/0!	#DIV/0!	#DIV/0!	NA	NA	NA
brv3	chrX	3.46321	5.56414	3.21445	3.19907	2.9877	8.0439	7.12837	4.04353	6.57558	8.44345	7.67963	9.55374	4.0806	4.74355	5.91583	8.55894	1.29079	2.86013	1.64484	0.942377	-0.5358	-0.318612	0.532852	0.653088	0.841792	0.562967
BRWD3	chr3R	3901.88	3257.41	4084.49	4789	5157.76	5920.31	4474.24	5408.23	5415.46	4550.25	4172.92	5039.07	3747.93	5289.03	5099.31	4587.41	434.506	576.962	541.339	434.268	-0.444209	0.0527	-0.152621	0.000634588	0.816712	0.333385
brwl	chr2L	1728.14	1550.8	1959.74	2037.81	1951.96	2064.27	1683.48	1858	1722.8	1958.88	1881.51	1815.21	1746.23	2018.01	1754.76	1885.2	205.068	58.71	91.5447	71.906	-0.00703327	0.201658	0.103442	0.950016	0.0951512	0.405084
bs	chr2R	1081.68	1003.93	1189.35	1025.83	1109.43	1046.71	818.574	1084.68	1009.82	1132.96	1123.15	1064.71	1091.65	1060.66	971.025	1106.94	93.11	43.5089	137.229	36.8973	0.168931	0.127382	0.188995	0.210493	0.461184	0.175205
bsf	chr2L	4618.76	3693	5049.9	4344.33	3723.67	5243.62	3060.45	2881.02	3155.34	3532.43	3717.9	4300.25	4453.89	4437.21	3032.27	3850.19	693.314	764.219	139.316	400.636	0.554668	0.549254	0.344534	0.000193838	0.000586223	0.0339363
Bsg	chr2L	7664.08	8214.26	8496.86	8042.46	7490.16	7073.6	9293.02	9005.96	8214.78	7439.45	7521.24	6946.63	8125.07	7535.41	8837.92	7302.44	423.495	486.009	558.411	310.841	-0.121327	-0.230022	-0.275328	0.19247	0.0161778	0.00151501
Bsg25A	chr2L	2.30881	0	0	0	0	0	1.18806	0	0.939369	0	0	0	0.769602	0	0.709143	0	1.33299	0	0.626598	0	0.118034	#NUM!	#NUM!	NA	NA	NA
Bsg25D	chr2L	2055.99	1371.16	1984.39	2343.85	2340.36	2972.22	2481.86	2634.36	2222.55	1993.42	1927.59	2158.08	1803.85	2552.14	2446.26	2026.36	376.422	363.8	208.203	118.727	-0.439499	0.0611344	-0.271682	0.00660862	0.825862	0.13336
bsh	chr2L	0	0	0	0	0	0	0	0	0	0	0	0	0	0	0	0	0	0	0	0	#DIV/0!	#DIV/0!	#DIV/0!	NA	NA	NA
bsk	chr2L	758.442	825.877	798.255	799.767	781.781	701.83	756.795	759.173	709.224	688.525	696.927	632.67	794.191	761.126	741.731	672.707	33.9004	52.1332	28.1769	34.9269	0.0985914	0.0372397	-0.140916	0.373622	0.828432	0.234461
bt	chr4	522.944	446.721	456.452	611.022	1204.04	578.155	1234.4	1904.5	1348.93	399.913	504.936	356.673	475.372	797.74	1495.94	420.507	41.4849	352.252	358.428	76.2468	-1.65393	-0.907067	-1.83085	4.90735e-07	0.0151186	2.67949e-08
BTBD9	chrX	2119.48	1957.78	2418.34	2793.85	2866.2	3086.85	2376.12	2939.65	2881.05	3118.7	2970.1	2758.91	2165.2	2915.63	2732.27	2949.24	233.657	152.624	309.823	180.803	-0.3356	0.0937075	0.110241	0.00399128	0.590889	0.446488
BtbVII	chr3L	4886.59	3701.74	5075.62	5860.69	6077.97	6939.87	6075.75	7305.65	6619.74	4996.22	4726.81	4941.41	4554.65	6292.85	6667.04	4888.15	744.661	570.776	616.317	142.381	-0.549708	-0.0833347	-0.447759	1.56045e-05	0.685994	0.000680187
btd	chrX	0	0	3.21445	2.13271	0.995899	2.01097	0	0	2.81811	0.767587	0	0	1.07148	1.7132	0.939369	0.255862	1.85586	0.624172	1.62704	0.443166	0.189845	0.866925	-1.87633	NA	NA	0.760835
BthD	chrX	1873.6	2219.3	1907.24	1685.91	1652.2	1375.51	1406.66	1535.53	1395.9	2135.43	2238.61	2109.25	2000.04	1571.2	1446.03	2161.1	190.622	170.315	77.6947	68.394	0.467931	0.11977	0.579664	1.28948e-05	0.440062	4.52337e-08
Btk29A	chr2L	4431.75	4090.44	4922.39	4839.12	5308.14	5402.48	5652.8	6345.31	5702.91	4262.41	4673.06	4576.24	4481.53	5183.25	5900.34	4503.9	418.206	301.732	386.173	214.669	-0.396808	-0.186941	-0.389622	2.62432e-05	0.106989	4.62358e-05
btl	chr3L	28.8601	38.1541	28.93	30.9243	29.877	57.3128	77.224	94.0121	108.967	31.4711	18.2391	21.2305	31.9814	39.3714	93.401	23.6469	5.34582	15.5465	15.8802	6.93902	-1.5462	-1.24629	-1.98179	7.16982e-06	0.000621944	1.77837e-08
btn	chr3R	0	0	0	1.06636	0	0	0	0	0	0.767587	0	0	0	0.355452	0	0.255862	0	0.615661	0	0.443166	#DIV/0!	#DIV/0!	#DIV/0!	NA	NA	NA
Btnd	chrX	1.1544	2.38463	5.35742	0	2.9877	2.01097	3.56418	2.02177	5.63622	3.07035	3.83982	8.49222	2.96548	1.66622	3.74072	5.13413	2.16087	1.52339	1.81368	2.93353	-0.33505	-1.16673	0.456802	0.820561	0.58632	0.749329
btsz	chr3R	1693.51	1464.16	1714.37	2106.05	2013.71	2376.97	2187.22	2122.85	2277.03	1406.22	1283.46	1631.57	1624.01	2165.58	2195.7	1440.41	138.828	188.806	77.4373	176.555	-0.435118	-0.0199305	-0.608198	0.000152723	0.932414	7.45499e-08
btv	chr2L	0	0.794877	0	0	0	0	2.37612	1.01088	0.939369	0	0	0	0.264959	0	1.44212	0	0.458922	0	0.809656	0	-2.44436	#NUM!	#NUM!	NA	NA	NA
btz	chr3R	3112.27	2867.92	3412.67	3304.64	3329.29	3482	2730.16	3666.47	3300.94	3635.29	3567.19	3625.11	3130.95	3371.98	3232.53	3609.2	272.859	96.079	471.889	36.7341	-0.0460607	0.0609321	0.159016	0.744571	0.745557	0.234049
Bub1	chr2L	1277.92	1112.03	1428.29	1762.69	1800.59	2128.62	1766.65	2324.02	1940.74	1605.79	1781.68	1607.15	1272.75	1897.3	2010.47	1664.87	158.191	201.224	285.155	101.156	-0.659585	-0.0835866	-0.27212	7.84356e-07	0.699951	0.0709662
Bub3	chr3R	3480.52	3743.08	3489.82	3187.34	3326.3	3052.66	2977.28	3435.99	3289.67	3922.37	3958.85	3759.93	3571.14	3188.77	3234.31	3880.38	148.973	136.828	234.312	105.899	0.142924	-0.0204616	0.262739	0.0959579	0.889663	0.0013809
BubR1	chr2R	2617.03	2561.89	2916.58	3443.26	3489.63	3418.66	3359.84	3950.53	3632.54	2896.87	3371.36	3279.06	2698.5	3450.52	3647.64	3182.43	190.863	36.0388	295.636	251.57	-0.434805	-0.0801495	-0.196834	3.93337e-06	0.574314	0.0612137
Buffy	chr2R	170.852	205.078	177.866	154.622	144.405	103.565	182.961	164.774	164.39	158.89	150.713	136.937	184.599	134.197	170.708	148.847	18.0793	27.0156	10.6132	11.0951	0.112859	-0.347177	-0.197706	0.602433	0.15095	0.419519
bug	chr2R	784.994	846.544	761.824	709.127	658.289	573.128	583.338	465.006	487.533	726.137	662.368	712.285	797.787	646.848	511.959	700.263	43.7847	68.7176	62.8338	33.5408	0.639976	0.337398	0.451869	1.471e-07	0.0188413	0.000386221
Bug22	chr2L	1728.14	1775.75	1472.22	1427.85	1392.27	1339.31	1769.02	1503.18	1662.68	1546.69	1523.45	1464.91	1658.7	1386.48	1644.96	1511.68	163.247	44.554	133.803	42.1406	0.0120014	-0.246633	-0.121902	0.923609	0.036487	0.323972
BuGZ	chr2L	3018.76	2775.71	3064.44	2306.53	2418.04	2288.49	1917.53	1693.23	1668.32	2839.3	2902.9	2911.77	2952.97	2337.69	1759.69	2884.66	155.203	70.1729	137.258	39.5279	0.746843	0.409758	0.713076	2.30915e-22	9.40111e-07	1.20623e-20
bun	chr2L	8685.72	8099	8934.03	11001.6	11166	10755.7	11808.1	11835.4	10507.8	9627.07	9430.59	9034.66	8572.92	10974.4	11383.8	9364.11	428.79	206.506	758.759	301.752	-0.409122	-0.0528329	-0.281767	1.62747e-08	0.65138	0.000189975
bur	chr2L	7881.11	7571.2	8571.86	8776.11	9413.24	9633.57	7712.89	9022.13	8777.47	8934.71	9610.1	9112.15	8008.06	9274.31	8504.16	9218.99	512.268	445.295	696.094	350.143	-0.0867171	0.12507	0.116439	0.392437	0.27919	0.268211
Burs	chr3R	0	0	0	0	0	0	0	0	0	0	0	0	0	0	0	0	0	0	0	0	#DIV/0!	#DIV/0!	#DIV/0!	NA	NA	NA
bves	chrX	1448.78	1155.75	1470.07	1498.23	1520.74	1731.45	1346.07	1654.82	1368.66	1729.37	1638.64	1605.03	1358.2	1583.47	1456.52	1657.68	175.649	128.645	172.103	64.3212	-0.100826	0.120569	0.186644	0.495409	0.51419	0.206731
bw	chr2R	6.92642	5.56414	16.0722	3.19907	0.995899	4.02195	11.8806	4.04353	5.63622	15.3517	9.59954	5.30763	9.52093	2.73897	7.18679	10.0863	5.71434	1.56461	4.14224	5.03971	0.405756	-1.39171	0.488979	0.672757	0.389455	0.592936
bwa	chr2L	2320.35	1596.11	2259.76	1328.68	1032.75	1618.83	2089.8	1979.31	2241.34	1809.2	1417.85	1851.3	2058.74	1326.75	2103.48	1692.79	401.791	293.048	131.548	239.028	-0.0310175	-0.664878	-0.31338	0.900256	0.000833839	0.137618
Bx	chrX	995.095	892.647	995.408	1058.89	1049.68	1113.07	1084.7	1140.28	958.157	847.416	839.96	989.343	961.05	1073.88	1061.04	892.24	59.2391	34.2535	93.3359	84.1767	-0.142802	0.0173495	-0.249982	0.23855	0.934088	0.0344948
Bx42	chrX	3496.69	3501.43	3176.95	3383.55	3431.87	3496.08	3572.5	3975.8	3739.63	3636.06	3643.03	3428.73	3391.69	3437.17	3762.64	3569.27	185.986	56.4526	202.634	121.761	-0.149743	-0.130528	-0.076117	0.0584719	0.160946	0.414409
by	chr3R	447.908	380.746	418.95	573.699	557.704	537.936	628.484	652.02	632.196	469.763	486.697	458.58	415.868	556.446	637.567	471.68	33.687	17.915	12.6536	14.1563	-0.61645	-0.196334	-0.434768	7.69626e-10	0.115933	2.33976e-05
byn	chr3L	0	0	0	0	0.995899	0	2.37612	2.02177	0.939369	0	0	0	0	0.331966	1.77909	0	0	0.574983	0.748489	0	#NUM!	-2.42203	#NUM!	NA	NA	NA
bys	chrX	3083.41	2861.56	3379.46	2749.07	2779.55	2923.96	2176.53	2478.69	2356.88	2830.09	2965.3	2832.15	3108.14	2817.53	2337.36	2875.85	259.835	93.4243	152.021	77.4734	0.41117	0.269546	0.299105	2.13069e-06	0.00597523	0.000949244
c-cup	chr2L	0	0	0	0	0	0	0	0	0	0	0	0	0	0	0	0	0	0	0	0	#DIV/0!	#DIV/0!	#DIV/0!	NA	NA	NA
c(2)M	chr2L	460.607	411.746	473.596	862.682	814.646	840.587	1174.99	1006.84	775.919	1101.49	1223.94	1075.33	448.649	839.305	985.917	1133.59	32.6123	24.0438	200.358	79.3368	-1.13588	-0.232271	0.201354	9.80689e-16	0.217067	0.233888
c(3)G	chr3R	1382.97	1759.06	1366.14	2398.23	2464.85	1716.37	2207.42	2173.4	1843.98	648.611	646.049	704.854	1502.73	2193.15	2074.93	666.505	222.153	414.248	200.731	33.2361	-0.465483	0.0799402	-1.63838	0.00343455	0.755158	6.28717e-29
c11.1	chrX	2487.74	2185.12	2624.06	2701.08	2530.58	3451.84	3532.11	3416.79	3602.48	2397.94	2417.16	3052.95	2432.31	2894.5	3517.12	2622.69	224.662	490.14	93.7501	372.745	-0.532072	-0.281083	-0.423351	0.000132057	0.0965934	0.00357148
c12.1	chrX	2164.5	2611.97	2142.97	1715.77	1979.85	1595.71	1956.74	1875.19	1948.25	1959.65	1917.99	2033.89	2306.48	1763.77	1926.73	1970.51	264.778	196.518	44.8338	58.7066	0.259541	-0.127485	0.0324161	0.0224075	0.409734	0.851224
c12.2	chrX	751.516	585.029	795.04	862.682	813.65	1114.08	737.786	688.411	745.859	720.764	625.89	794.022	710.529	930.137	724.019	713.559	110.843	161.175	31.1	84.2972	-0.0271346	0.361416	-0.0209952	0.89458	0.056803	0.936469
C15	chr3R	0	0	0	0	0	0	0	1.01088	0	0	0	0	0	0	0.336961	0	0	0	0.583634	0	#NUM!	#NUM!	#NUM!	NA	NA	NA
C1GalTA	chr2L	4410.97	4451.31	4337.36	3449.66	3363.15	3708.24	3336.08	3370.28	3334.76	3380.45	2886.58	3194.13	4399.88	3507.02	3347.04	3153.72	57.7772	179.55	20.1408	249.402	0.394579	0.0673583	-0.0858301	2.85993e-07	0.568632	0.383821
C3G	chrX	1858.59	1516.63	1848.31	1990.89	2131.22	2335.75	1919.91	2576.74	2308.03	2227.54	1978.47	2004.16	1741.17	2152.62	2268.23	2070.05	194.533	173.423	330.221	136.987	-0.381504	-0.0754714	-0.131895	0.00422496	0.721415	0.421528
C901	chrX	0	0	0	0	0	0	0	0	0.939369	0	0	0	0	0	0.313123	0	0	0	0.542345	0	#NUM!	#NUM!	#NUM!	NA	NA	NA
ca	chr3R	1926.7	1745.55	2116.18	2568.85	2486.76	2832.46	2411.76	2777.91	2748.59	2451.67	2601.48	2668.68	1929.48	2629.36	2646.09	2573.94	185.33	180.616	203.459	111.093	-0.455653	-0.00915168	-0.0398818	6.59647e-06	0.964864	0.787293
Ca-alpha1D	chr2L	15.0072	12.718	12.8578	24.5262	40.8319	13.0713	72.4717	148.6	92.9976	15.3517	23.0389	11.6768	13.5277	26.1431	104.69	16.6891	1.28323	13.9507	39.3878	5.79792	-2.95213	-2.00162	-2.64914	9.07638e-12	2.02759e-06	2.82394e-10
Ca-alpha1T	chrX	30.0145	23.0514	21.4297	38.3888	58.7581	29.1591	67.7195	159.72	104.27	39.9145	32.6384	30.7843	24.8319	42.102	110.57	34.4457	4.56094	15.1448	46.3224	4.82597	-2.15469	-1.393	-1.68256	1.08257e-08	0.000353601	5.73977e-06
Ca-beta	chr2L	152.381	144.668	123.221	313.509	317.692	299.635	186.526	174.883	137.148	116.673	132.474	102.968	140.09	310.279	166.185	117.372	15.1097	9.45175	25.8123	14.7652	-0.246443	0.90077	-0.50171	0.240767	1.95461e-07	0.0120453
Ca-Ma2d	chr2L	21.9336	11.1283	18.2152	25.5925	40.8319	24.1317	65.3434	89.9686	74.2102	13.049	21.119	16.9844	17.0924	30.1854	76.5074	17.0508	5.4895	9.24903	12.4723	4.03542	-2.16225	-1.34175	-2.16576	3.51612e-09	0.000364537	3.33649e-09
CaBP1	chr2L	8873.89	9970.94	8847.24	8374.09	7241.18	7943.35	10021.3	7961.72	9144.76	7567.64	7358.05	8601.55	9230.69	7852.88	9042.59	7842.41	641.212	571.848	1033.58	665.734	0.029702	-0.203515	-0.205439	0.841484	0.139839	0.100744
cac	chrX	106.205	93.7955	90.0046	164.219	135.442	154.845	206.723	187.013	155.935	110.532	63.357	92.3528	96.6684	151.502	183.224	88.7474	8.47371	14.6766	25.6049	23.7935	-0.922491	-0.27427	-1.04583	4.87925e-05	0.368683	5.16275e-06
cact	chr2L	7787.6	7975	8702.59	9512.96	10601.3	9846.74	7362.42	10203.9	9194.55	9976.32	10747.6	9384.96	8155.06	9987.01	8920.27	10036.3	483.339	557.588	1440.44	683.322	-0.129392	0.162966	0.170069	0.347741	0.310268	0.231659
cactin	chrX	960.463	1019.83	1074.7	1029.03	1147.28	1090.95	971.834	1240.35	1159.18	1149.84	1204.74	1115.66	1018.33	1089.09	1123.79	1156.75	57.132	59.1433	137.714	44.9387	-0.142168	-0.0452522	0.0417058	0.242803	0.805897	0.806321
cad	chr2L	6014.44	4765.29	6214.6	6461.05	7499.12	7123.88	5005.3	6962.96	6307.86	6766.28	6807.04	6312.9	5664.78	7028.02	6092.04	6628.74	785.383	525.633	996.516	274.281	-0.104907	0.206191	0.121808	0.524011	0.249906	0.491872
Cad74A	chr3L	4716.89	4692.16	4658.81	7351.46	6223.37	6673.42	5690.81	4713.75	5248.26	4617.03	3611.35	5091.08	4689.29	6749.42	5217.61	4439.82	29.1465	567.869	489.253	755.617	-0.15402	0.371375	-0.232886	0.293979	0.0103677	0.112168
Cad86C	chr3R	260.895	201.104	251.799	380.689	303.749	421.299	218.603	257.775	267.72	210.319	275.507	255.828	237.932	368.579	248.033	247.218	32.2172	59.7033	25.9674	33.4361	-0.0599795	0.571443	-0.00474854	0.781012	0.00499401	0.973397
Cad87A	chr3R	3248.49	2875.07	3353.74	3870.87	3716.7	4471.4	2570.96	2333.12	2390.69	2709.58	2229.01	3032.78	3159.1	4019.66	2431.59	2657.13	251.544	398.745	124.085	404.444	0.377612	0.725171	0.127965	0.00349182	9.03886e-09	0.422101
Cad88C	chr3R	813.854	805.21	758.61	958.654	802.695	990.405	655.81	565.084	583.348	366.139	274.547	466.01	792.558	917.251	601.414	368.899	29.7158	100.471	47.9852	95.7615	0.398158	0.608959	-0.705134	0.0230461	0.000758348	4.62358e-05
Cad89D	chr3R	0	0	1.07148	5.33178	1.9918	2.01097	0	1.01088	0.939369	0	0	2.12305	0.357161	3.11152	0.650084	0.707685	0.618621	1.92283	0.564124	1.22575	-0.864052	2.25892	0.12248	NA	NA	0.996239
Cad96Ca	chr3R	1.1544	2.38463	3.21445	3.19907	1.9918	5.02744	2.37612	4.04353	3.75748	0.767587	0	2.12305	2.25116	3.4061	3.39238	0.963547	1.03649	1.52837	0.891649	1.07501	-0.591628	0.00582441	-1.81587	0.675487	1	0.311332
Cad96Cb	chr3R	1.1544	1.58975	1.07148	2.13271	0.995899	1.00549	0	0	0.939369	4.60552	2.87986	0	1.27188	1.37803	0.313123	2.49513	0.278391	0.653589	0.542345	2.32674	2.02216	2.13781	2.99431	0.63036	NA	0.257992
Cad99C	chr3R	2620.49	2388.6	2775.14	2770.39	2124.25	3175.33	2047.03	1573.95	2024.34	2914.53	2637.95	3857.59	2594.75	2689.99	1881.77	3136.69	194.55	530.13	266.827	639.449	0.463502	0.51551	0.737151	0.0115538	0.00995417	3.60395e-05
CadN	chr2L	145.455	85.8467	155.365	198.342	201.172	188.026	133.063	193.079	146.542	218.762	304.306	255.828	128.889	195.847	157.561	259.632	37.6035	6.91896	31.4888	42.8983	-0.289784	0.313813	0.720557	0.281811	0.341121	0.00385887
CadN2	chr2L	1.1544	0	1.07148	0	1.9918	2.01097	0	1.01088	4.69685	0.767587	0.959954	1.06153	0.741962	1.33426	1.90258	0.929689	0.643894	1.15554	2.47213	0.149289	-1.35854	-0.511917	-1.03313	NA	NA	0.642336
Cadps	chr4	105.051	155.796	153.222	653.676	485.003	633.457	621.356	348.755	340.052	149.679	182.391	156.044	138.023	590.712	436.721	162.705	28.5838	92.1033	159.958	17.3433	-1.6618	0.435744	-1.42445	1.27012e-11	0.140848	5.44568e-09
Caf1-105	chr2R	3459.74	3489.51	3556.25	3669.33	4270.42	3846.99	3081.83	4343.77	3999.83	4158.78	4529.06	3746.13	3501.84	3928.91	3808.48	4144.66	49.4206	308.802	652.367	391.659	-0.121103	0.0449163	0.122039	0.423395	0.849886	0.460079
Caf1-180	chrX	4787.31	4263.72	5056.33	6325.62	6955.36	6344.62	5101.53	7273.3	6587.8	6125.34	6105.31	5596.37	4702.45	6541.87	6320.88	5942.34	403.06	358.22	1110.22	299.786	-0.426712	0.0495778	-0.089094	0.000955726	0.82738	0.604193
Caf1-55	chr3R	9570	11293.6	10233.7	9223.98	9133.39	8761.82	7155.69	8741.11	8976.61	10347.8	10424.1	10542	10365.8	9039.73	8291.14	10438	869.36	244.904	990.349	97.8335	0.322187	0.124709	0.332203	0.00152983	0.365587	0.00135216
cag	chr2R	481.386	541.311	415.735	366.826	416.286	357.953	419.386	271.928	304.356	390.702	438.699	407.626	479.477	380.355	331.89	412.342	62.8096	31.4315	77.4891	24.3438	0.53076	0.196644	0.313139	0.00237057	0.414763	0.110386
CAH1	chr2L	45.0217	46.8977	43.9308	19.1944	24.8975	22.1207	68.9076	89.9686	71.3921	34.5414	35.5183	30.7843	45.2834	22.0709	76.7561	33.6147	1.50068	2.85186	11.5096	2.49938	-0.761298	-1.79814	-1.19119	0.00730254	5.55819e-09	3.39016e-05
CAH13	chr2R	0	0.794877	0	0	0	0	0	0	0	0	0.959954	0	0.264959	0	0	0.319985	0.458922	0	0	0.55423	#DIV/0!	#DIV/0!	#DIV/0!	NA	NA	NA
CAH14	chr2R	0	0	0	0	0	0	0	0	0	0	0	0	0	0	0	0	0	0	0	0	#DIV/0!	#DIV/0!	#DIV/0!	NA	NA	NA
CAH15	chr2R	0	0	0	0	0	2.01097	1.18806	0	0	0.767587	0	0	0	0.670325	0.39602	0.255862	0	1.16104	0.685927	0.443166	#NUM!	0.759286	-0.630208	NA	NA	NA
CAH16	chr3R	0	0	0	0	0	0	0	0	0	0	0	0	0	0	0	0	0	0	0	0	#DIV/0!	#DIV/0!	#DIV/0!	NA	NA	NA
CAH2	chr3L	1057.43	1051.62	1071.48	1050.36	1159.23	1161.34	796.001	979.546	1016.4	1670.27	1522.49	1393.78	1060.18	1123.64	930.648	1528.85	10.2114	63.4721	118.055	138.351	0.188001	0.271874	0.716136	0.143811	0.048429	1.11532e-10
CAH3	chrX	5959.03	5793.86	6072.09	6177.4	6474.34	5879.08	6027.03	6235.13	5929.3	6204.4	6184.03	5950.92	5941.66	6176.94	6063.82	6113.12	139.929	297.629	156.198	140.835	-0.0293611	0.0266656	0.0116809	0.713958	0.808337	0.90844
CAH4	chr3R	0	0	0	0	0.995899	1.00549	0	0	0	0	0	0	0	0.667129	0	0	0	0.57777	0	0	#DIV/0!	#DIV/0!	#DIV/0!	NA	NA	NA
CAH5	chr3R	20.7792	16.6924	18.2152	31.9907	29.877	16.0878	61.7792	58.6312	89.2401	29.1683	19.1991	32.9073	18.5623	25.9851	69.8835	27.0916	2.0654	8.63627	16.837	7.08616	-1.91258	-1.42726	-1.36711	3.84587e-07	0.000252889	0.000209098
CAH6	chr3R	11.544	4.76926	7.50038	6.39814	5.9754	6.03292	7.12837	14.1524	8.45432	5.37311	1.91991	4.24611	7.93789	6.13548	9.91169	3.84637	3.40851	0.229274	3.7319	1.76096	-0.320375	-0.691953	-1.36563	0.671093	0.498708	0.139004
CAH7	chr3R	1553.83	1433.96	1516.15	1481.17	1649.21	1473.04	1066.88	1272.7	1241.85	1591.21	1527.29	1354.51	1501.31	1534.47	1193.81	1491	61.296	99.4483	111.002	122.45	0.330651	0.36217	0.320709	0.00214933	0.00167556	0.00353109
CAH8	chr3R	1.1544	1.58975	1.07148	0	0.995899	0	0	2.02177	0	1.53517	1.91991	0	1.27188	0.331966	0.673922	1.15169	0.278391	0.574983	1.16727	1.01578	0.916308	-1.02154	0.773104	NA	NA	NA
CAH9	chr3R	90.0434	85.8467	71.7894	60.7823	80.6678	36.1975	154.448	184.992	186.934	105.927	82.5561	88.1067	82.5598	59.2159	175.458	92.1966	9.5606	22.2765	18.2212	12.2104	-1.08761	-1.56707	-0.928341	2.1006e-05	3.50216e-09	0.000371053
CAHbeta	chr3R	611.833	572.311	571.1	513.984	590.568	489.672	459.78	519.594	474.381	582.598	672.928	543.502	585.082	531.408	484.585	599.676	23.1755	52.6565	31.1853	66.3816	0.271888	0.13307	0.307433	0.0412805	0.464711	0.0229274
cal1	chr3R	4324.39	4036.38	4667.38	5445.88	6179.55	6058.06	5353.4	6862.89	5608.03	5164.32	5446.78	4933.98	4342.72	5894.5	5941.44	5181.69	315.897	393.236	808.087	256.843	-0.452214	-0.011444	-0.197389	4.35464e-05	0.961104	0.118374
CalpA	chr2R	711.112	809.185	857.186	1187.92	1144.29	1207.59	811.446	837.011	897.098	959.483	969.554	967.051	792.494	1179.93	848.518	965.363	74.4538	32.3981	43.9701	5.24329	-0.098545	0.475687	0.186125	0.379563	8.24347e-07	0.0825547
CalpB	chr3L	2193.36	1951.42	2468.7	2677.62	2567.43	2851.56	2832.34	3146.88	2875.41	2552.23	2649.47	2559.34	2204.49	2698.87	2951.54	2587.01	258.817	143.254	170.532	54.2091	-0.421021	-0.129114	-0.190181	2.02584e-05	0.337503	0.0890153
CalpC	chrX	394.806	309.207	334.303	483.059	420.269	482.634	292.263	355.831	314.689	504.304	646.049	623.116	346.105	461.988	320.928	591.157	44.0029	36.1295	32.2399	76.0853	0.108963	0.525606	0.881293	0.590305	0.00180257	2.63514e-09
Calr	chr3R	26056	25745.3	24779.1	22151.4	21525.4	22429.4	18192.8	18344.5	20150.4	22084.2	21178.5	23691.2	25526.8	22035.4	18895.9	22318	665.894	463.051	1089.09	1272.53	0.43394	0.22175	0.240133	2.85315e-10	0.00499601	0.00105749
Cals	chr4	2800.58	2991.92	2916.58	4188.65	3466.73	3901.29	5619.53	3834.28	3356.37	2350.35	2425.8	2774.83	2903.02	3852.22	4270.06	2517	96.3852	363.453	1192.86	226.457	-0.556699	-0.148566	-0.762553	0.000936407	0.549375	4.2277e-06
Calx	chr3R	4932.76	4417.13	4863.46	5493.87	5227.47	5985.67	5343.9	5018.02	5118.62	3331.33	2852.02	3890.5	4737.78	5569	5160.18	3357.95	279.848	384.639	166.865	519.748	-0.123209	0.109997	-0.619842	0.350548	0.511387	3.51636e-08
calypso	chr2R	963.926	962.596	996.479	1061.02	1035.74	963.257	849.464	1049.3	879.25	1193.6	1215.3	1125.22	974.334	1020.01	926.003	1178.04	19.1901	50.7463	107.809	47.0138	0.0733986	0.139487	0.347298	0.563569	0.317257	0.000943379
Cam	chr2R	24007	26568	23771.9	24681.9	22966.4	19509.5	15802.4	18528.5	18138.3	23786.7	21773.7	22537.3	24782.3	22385.9	17489.7	22699.2	1550.91	2634.61	1474.23	1016.25	0.502802	0.356085	0.376136	1.53338e-06	0.00217503	0.00055226
CaMKI	chr4	4608.37	4851.13	4539.87	4897.77	4249.5	4001.84	6781.45	4808.77	4864.05	4430.51	4767.13	4034.86	4666.46	4383.04	5484.76	4410.84	163.558	462.653	1123.31	366.531	-0.2331	-0.323497	-0.314376	0.12767	0.0513759	0.0412114
CaMKII	chr4	5889.76	6472.68	5855.66	6040.91	5377.86	5023.41	7478.85	5619.5	5468.07	4904.88	5657.97	5185.56	6072.7	5480.73	6188.8	5249.47	346.815	516.487	1119.77	380.592	-0.0273227	-0.175294	-0.237489	0.881775	0.318854	0.109525
Camp	chr2R	1150.94	1230.47	1351.14	1403.32	1471.94	1337.3	1198.75	1464.77	1313.24	1688.69	1809.51	1421.38	1244.18	1404.19	1325.59	1639.86	100.802	67.3246	133.437	198.618	-0.091433	0.0831036	0.306944	0.530157	0.668166	0.0175622
Camta	chr2R	901.588	735.261	976.121	1139.93	1224.96	1355.4	1146.48	1388.95	1246.54	1144.47	1144.27	1053.03	870.99	1240.1	1260.66	1113.92	123.311	108.526	121.852	52.7317	-0.533449	-0.0237261	-0.178527	2.99356e-05	0.927071	0.242127
can	chr3L	3.46321	0	0	1.06636	0	3.01646	2.37612	5.05442	2.81811	0	0	0	1.1544	1.36094	3.41622	0	1.99948	1.52966	1.43583	0	-1.56525	-1.3278	#NUM!	0.343286	NA	0.141616
cana	chr2L	5986.73	4944.13	6422.47	7158.45	7918.39	8019.77	6914.52	7607.91	6915.64	7068.7	6806.08	7762.95	5784.45	7698.87	7146.02	7212.58	759.644	470.756	400.006	494.393	-0.304961	0.107507	0.0133746	0.0067828	0.502275	0.942335
CanA-14F	chrX	4607.22	4192.98	4743.46	5407.49	5199.59	5346.18	4697.59	5488.09	5144.93	4551.79	4183.48	4824.64	4514.55	5317.75	5110.2	4519.97	286.702	106.825	396.388	321.762	-0.178798	0.0574363	-0.177067	0.0617908	0.694219	0.0788975
CanA1	chr3R	2.30881	2.38463	2.14297	0	1.9918	4.02195	0	0	0.939369	0	0.959954	1.06153	2.2788	2.00458	0.313123	0.673827	0.123595	2.011	0.542345	0.585757	2.86347	2.6785	1.10565	0.292263	NA	0.908328
CanB	chrX	2.30881	2.38463	1.07148	1.06636	2.9877	3.01646	1.18806	1.01088	0	2.30276	5.75973	1.06153	1.92164	2.35684	0.732981	3.04134	0.737233	1.11768	0.640932	2.43462	1.39049	1.685	2.05286	0.589429	NA	0.316237
CanB2	chr2R	8698.42	9881.11	8208.63	7820.65	7557.88	6769.95	10245.8	8058.76	8330.33	6917.49	6585.29	6738.57	8929.39	7382.83	8878.31	6747.12	859.83	546.79	1192.07	166.267	0.00827662	-0.266112	-0.396014	0.95631	0.0470126	0.000687998
Cand1	chr2L	5067.83	4909.95	5060.61	5553.58	5214.53	6231	4299.59	5011.96	5237.92	5103.68	4903.45	5798.06	5012.8	5666.37	4849.83	5268.4	89.1389	517.54	489.725	469.501	0.0476835	0.224492	0.119431	0.73114	0.0814909	0.369718
CAP	chr2R	451.371	422.874	490.739	620.619	629.408	587.205	664.126	848.131	790.01	506.607	501.096	486.179	454.995	612.411	767.422	497.961	34.0772	22.2671	94.0589	10.5686	-0.75417	-0.325521	-0.623988	5.48384e-11	0.0143957	7.53778e-08
Cap-D2	chr3R	2491.2	3006.22	3186.59	3323.83	3577.27	3590.59	3136.48	3878.76	3944.41	2653.55	2852.02	2832.15	2894.67	3497.23	3653.22	2779.24	360.867	150.317	448.709	109.307	-0.335768	-0.0629541	-0.394476	0.00566193	0.746126	0.00121356
Cap-D3	chr2L	572.584	476.131	594.673	773.108	762.859	840.587	796.001	886.545	886.765	930.315	970.514	818.437	547.796	792.185	856.437	906.422	63.0386	42.23	52.339	78.8034	-0.644708	-0.11251	0.0818362	3.88118e-08	0.515855	0.606164
Cap-G	chr2R	3436.66	3107.97	3652.69	4243.03	4907.79	5018.39	4373.25	5695.32	5017.17	4674.6	4517.54	4422.32	3399.1	4723.07	5028.58	4538.16	274.293	419.388	661.105	127.397	-0.564997	-0.0904264	-0.148045	5.54063e-07	0.605431	0.285177
Cap-H2	chr3R	316.306	244.822	360.018	451.069	482.015	637.479	356.418	479.159	411.444	470.531	489.577	433.103	307.049	523.521	415.674	464.403	58.1534	99.8962	61.4794	28.7311	-0.436983	0.332796	0.159928	0.0248231	0.151795	0.508537
Capa	chr3R	0	0	0	0	0	0	0	0	0	0	0	0	0	0	0	0	0	0	0	0	#DIV/0!	#DIV/0!	#DIV/0!	NA	NA	NA
CapaR	chr3L	1.1544	2.38463	0	0	2.9877	0	0	1.01088	2.81811	1.53517	0.959954	3.18458	1.17968	0.995899	1.27633	1.89324	1.19252	1.72495	1.42768	1.15473	-0.113609	-0.35793	0.568853	0.969736	NA	0.842993
Caper	chr2L	3351.23	3201.76	3187.66	3110.56	3205.8	3348.27	2713.53	2876.97	2771.14	3074.18	3185.13	3145.3	3246.89	3221.54	2787.21	3134.87	90.6401	119.636	82.8983	56.2029	0.220232	0.208928	0.169582	0.000743868	0.00333342	0.0141465
Capr	chr3L	20930.5	21395.7	23318.7	23893.8	23067	24539.9	18625.2	21157.8	21176.2	22911.7	21835.1	24612.6	21881.6	23833.6	20319.7	23119.8	1266.09	738.298	1467.51	1400.37	0.106838	0.230114	0.186246	0.258401	0.0159866	0.0431005
caps	chr3L	694.95	678.825	693.25	751.781	660.281	812.434	915.995	923.947	928.097	609.464	607.651	661.331	689.008	741.499	922.68	626.149	8.86	76.5956	6.14956	30.4825	-0.421309	-0.315386	-0.559325	2.62255e-05	0.0046886	1.35268e-08
capt	chr2L	8520.65	9949.47	8857.95	9088.55	8390.45	8398.84	7910.11	8283.18	8661.92	9389.89	9123.41	10052.7	9109.36	8625.95	8285.07	9521.98	746.854	400.65	375.91	478.504	0.136835	0.0581686	0.200748	0.139087	0.666591	0.0295133
capu	chr2L	1019.34	906.954	1159.34	1208.18	1270.77	1280.99	1019.36	1350.54	1233.39	994.792	1071.31	1055.16	1028.55	1253.31	1201.1	1040.42	126.447	39.4182	167.937	40.3313	-0.223746	0.0613953	-0.207186	0.0972427	0.778034	0.152761
car	chrX	1619.63	1678.78	1562.22	1661.38	1585.47	1808.87	2101.68	1788.25	1767.89	1580.46	1586.8	1785.49	1620.21	1685.24	1885.94	1650.92	58.281	113.595	187.112	116.585	-0.219105	-0.16233	-0.192017	0.0432431	0.21778	0.094429
CARPA	chrX	0	0	0	0	0	0	1.18806	1.01088	0	0.767587	0	1.06153	0	0	0.732981	0.609705	0	0	0.640932	0.548092	#NUM!	#NUM!	-0.265667	NA	NA	NA
CARPB	chrX	77.345	62.0004	62.146	70.3795	81.6637	82.45	95.0449	99.0666	85.4826	101.321	112.315	100.845	67.1638	78.1644	93.198	104.827	8.81746	6.75338	6.97776	6.48883	-0.472616	-0.253788	0.16964	0.0427576	0.416224	0.530266
CarT	chr2L	8.08082	8.74365	3.21445	14.929	6.97129	18.0988	7.12837	5.05442	9.39369	4.60552	7.67963	5.30763	6.67964	13.333	7.19216	5.86426	3.01919	5.73285	2.17034	1.61088	-0.106655	0.890506	-0.294475	0.928325	0.317994	0.797927
cas	chr3R	13.8528	15.8975	23.5726	26.6589	36.8483	22.1207	4.75224	10.1088	5.63622	126.652	93.1156	122.076	17.7743	28.5426	6.83243	113.948	5.12449	7.54232	2.87166	18.1856	1.37932	2.06265	4.05983	0.0309125	0.000242011	1.10748e-26
CASK	chr3R	3108.81	2675.56	3244.45	3271.58	3647.98	3764.54	3030.74	3881.79	3590.27	3145.57	2966.26	2991.38	3009.6	3561.37	3500.94	3034.4	297.138	257.642	432.5	97.0887	-0.218167	0.0246911	-0.206327	0.0739566	0.915645	0.113301
casp	chr2R	3448.2	3776.46	4127.35	4344.33	4467.6	4578.99	4509.88	5635.67	4941.08	4402.11	5004.24	4435.06	3784	4463.64	5028.88	4613.8	339.639	117.378	568.009	338.531	-0.410323	-0.172015	-0.12428	0.000121443	0.208012	0.341695
cass	chr2L	5654.26	5454.44	5682.07	5616.5	4928.71	5042.52	4494.44	4053.64	4144.5	4987.01	4285.24	5433.96	5596.93	5195.91	4230.86	4902.07	124.175	368.66	232.741	579.052	0.403685	0.296425	0.21244	6.37098e-05	0.00929382	0.0583769
Cat	chr3L	2800.58	3273.3	2761.21	3030.58	2709.84	2968.2	2986.79	2920.44	2958.07	2780.97	2996.98	3224.92	2945.03	2902.87	2955.1	3000.95	284.972	170.057	33.272	222.003	-0.00492397	-0.025725	0.0222141	0.978448	0.887864	0.888902
cathD	chr2R	12974.3	14613.8	13198.5	8078.71	7757.06	7465.74	9755.17	8998.88	9950.74	11110	11376.4	10835	13595.6	7767.17	9568.26	11107.2	888.931	306.61	502.701	270.718	0.506806	-0.300868	0.215161	3.48775e-12	0.000195326	0.00719724
cato	chr2R	0	0	0	0	0	0	0	0	0	0.767587	0	0	0	0	0	0.255862	0	0	0	0.443166	#DIV/0!	#DIV/0!	#DIV/0!	NA	NA	NA
Catsup	chr2L	2993.37	3428.3	2895.15	2920.75	2916.99	2978.25	3145.99	2995.25	3200.43	3136.36	3168.81	3181.4	3105.61	2938.66	3113.89	3162.19	283.747	34.3372	106.291	23.2373	-0.00384244	-0.0835569	0.0222061	0.982067	0.47184	0.860083
caup	chr3L	0	0.794877	0	0	0	0	0	0	0	0	0	0	0.264959	0	0	0	0.458922	0	0	0	#DIV/0!	#DIV/0!	#DIV/0!	NA	NA	NA
cav	chr3R	2202.6	2290.04	2020.82	2174.3	2239.78	1716.37	2297.71	2179.46	1898.47	2371.84	2440.2	2083.78	2171.15	2043.48	2125.21	2298.61	137.339	285.175	205.077	189.162	0.0308534	-0.0565787	0.113153	0.853695	0.797268	0.48085
caz	chrX	3036.08	2386.22	3066.58	2580.58	2631.17	2571.03	1962.68	2175.42	2245.09	2359.56	2399.89	2485.03	2829.63	2594.26	2127.73	2414.83	384.305	32.3166	147.124	64.0572	0.411297	0.286007	0.182605	0.000142225	0.0211407	0.143502
cbc	chr2R	948.919	1226.49	979.336	780.573	786.76	879.801	870.849	834.99	941.248	895.006	883.158	902.298	1051.58	815.711	882.362	893.487	152.24	55.5897	54.0567	9.65993	0.25312	-0.113312	0.0180763	0.0423718	0.522301	0.930144
Cbl	chr3L	5927.86	5537.91	6412.83	8439.14	9135.38	8832.2	7245.99	8495.46	7445.44	8322.94	8388.08	7557.01	5959.53	8802.24	7728.96	8089.34	438.319	349.087	671.258	462.164	-0.375076	0.187596	0.0657479	4.94335e-05	0.0954345	0.597323
CBP	chrX	6339.98	7987.72	6461.04	5359.5	5618.86	4625.24	5960.5	6654.64	6365.17	7190.75	8140.41	7825.58	6929.58	5201.2	6326.77	7718.91	918.371	515.379	348.66	483.732	0.131298	-0.282624	0.286928	0.319201	0.036487	0.0211338
Cbp20	chr3R	1410.68	1420.44	1167.92	918.132	942.121	812.434	954.013	883.512	900.855	1106.86	1185.54	1009.51	1333.01	890.896	912.793	1100.64	143.062	69.0004	36.7355	88.1805	0.546331	-0.035032	0.26998	1.12134e-06	0.872608	0.0298423
Cbp53E	chr2R	1.1544	0.794877	3.21445	0	0	0	3.56418	5.05442	10.3331	0.767587	0	0	1.72124	0	6.31722	0.255862	1.30559	0	3.55674	0.443166	-1.87584	#NUM!	-4.62585	0.0620413	NA	0.00931538
Cbp80	chrX	3253.11	3092.07	3904.48	3911.39	3889.98	4495.53	3261.23	4166.86	3968.84	4288.51	4625.06	4242.92	3416.55	4098.97	3798.97	4385.5	430.163	343.601	476.111	208.716	-0.153068	0.109651	0.20713	0.27206	0.554139	0.147044
Cbs	chrX	6009.82	6616.55	5513.85	4653.58	4404.86	4836.39	5709.82	5088.79	5757.39	5273.32	5341.19	5669.62	6046.74	4631.61	5518.67	5428.04	552.278	216.603	373.047	211.944	0.131838	-0.252806	-0.0238885	0.193825	0.0160658	0.0919476
cbs	chrX	1088.6	874.365	1149.7	1191.12	1258.82	1391.59	1003.91	1255.52	1124.42	1388.56	1372.73	1255.79	1037.56	1280.51	1127.95	1339.03	144.592	101.983	125.84	72.5229	-0.120516	0.183014	0.247482	0.421674	0.293315	0.868898
cbt	chr2L	1459.16	972.929	1421.86	1611.26	1873.29	1708.32	1395.97	1431.41	1384.63	1691.76	1535.93	1550.89	1284.65	1730.96	1404	1592.86	270.602	132.47	24.4027	85.9772	-0.128171	0.302023	0.182072	0.442616	0.080437	0.294794
Cby	chr3R	2.30881	0	0	0	0	0	0	0	0.939369	0	0	2.12305	0.769602	0	0.313123	0.707685	1.33299	0	0.542345	1.22575	1.29738	#NUM!	1.17638	NA	NA	NA
Cc2d2a	chr2R	16.1616	7.94877	5.35742	34.1234	17.9262	36.1975	22.5732	22.2394	31.9386	5.37311	15.3593	16.9844	9.82261	29.4157	25.5837	12.5723	5.64059	10.0041	5.50598	6.28739	-1.38105	0.201361	-1.02498	0.0265907	0.820114	0.102849
CCAP	chr3R	1.1544	0.794877	0	0	0.995899	1.00549	0	2.02177	0	0	0	0	0.64976	0.667129	0.673922	0	0.590725	0.57777	1.16727	0	-0.0526755	-0.0146166	#NUM!	NA	NA	NA
CCAP-R	chr3R	15.0072	17.4873	32.1445	3.19907	2.9877	5.02744	10.6926	7.07618	17.848	5.37311	0	9.55374	21.5463	3.73807	11.8722	4.97562	9.26166	1.12162	5.48196	4.78926	0.859849	-1.66723	-1.25465	0.20836	0.168759	0.220244
CCDC151	chr3L	0	0	1.07148	0	0	0	0	0	0	0	0	0	0.357161	0	0	0	0.618621	0	0	0	#DIV/0!	#DIV/0!	#DIV/0!	NA	NA	NA
CCDC53	chr2L	262.049	294.899	251.799	227.134	263.913	208.136	281.571	239.579	254.569	259.444	234.229	248.397	269.582	233.061	258.573	247.357	22.5162	28.3572	21.28	12.6399	0.0601549	-0.149864	-0.0639779	0.728787	0.507434	0.786207
Ccdc56	chr3L	0	0	0	0	0	0	0	0	0	0	0	0	0	0	0	0	0	0	0	0	#DIV/0!	#DIV/0!	#DIV/0!	NA	NA	NA
Ccdc58	chr3L	1813.57	2044.42	1767.95	1457.71	1388.28	1223.68	1908.03	1413.21	1487.02	1426.94	1425.53	1385.29	1875.31	1356.56	1602.75	1412.59	148.22	120.198	266.937	23.6502	0.226578	-0.240604	-0.182211	0.0951632	0.130053	0.232126
CCHa1	chr3R	0	0	0	0	0	0	1.18806	0	0	0	0	0	0	0	0.39602	0	0	0	0.685927	0	#NUM!	#NUM!	#NUM!	NA	NA	NA
CCHa1-R	chr2R	4.61761	2.38463	3.21445	2.13271	0	7.03841	14.2567	16.1741	25.363	4.60552	6.71968	1.06153	3.40556	3.05704	18.5979	4.12891	1.12869	3.6091	5.9366	2.85903	-2.44918	-2.60494	-2.17131	0.00178345	0.00301836	0.00529419
CCHa2	chr3R	140.837	140.693	132.864	35.1897	33.8606	44.2414	90.2927	58.6312	56.3622	29.9359	49.9176	55.1994	138.131	37.7639	68.4287	45.0176	4.56236	5.64893	18.9687	13.3255	1.01337	-0.857593	-0.604111	0.00022237	0.0197828	0.0742381
CCHa2-R	chr2R	0	1.58975	0	0	0	0	1.18806	0	1.87874	0	1.91991	0	0.529918	0	1.02227	0.63997	0.917845	0	0.950279	1.10846	-0.947931	#NUM!	-0.675696	NA	NA	NA
Cchl	chr3R	4723.82	4821.72	4330.93	3656.53	3776.45	3827.89	4162.97	4045.55	4241.25	4270.08	4199.8	4184.54	4625.49	3753.62	4149.92	4218.14	259.748	87.9285	98.4985	45.6266	0.156521	-0.144801	0.0235223	0.0223878	0.0679922	0.813777
CCKLR-17D1	chrX	1.1544	0	0	0	0	0	0	0	0	0	0	0	0.384801	0	0	0	0.666495	0	0	0	#DIV/0!	#DIV/0!	#DIV/0!	NA	NA	NA
CCKLR-17D3	chrX	5.77201	2.38463	2.14297	0	0.995899	0	0	0	6.57558	3.83793	1.91991	2.12305	3.4332	0.331966	2.19186	2.62697	2.02907	0.574983	3.79642	1.05364	0.647399	-2.72305	0.26124	0.724798	0.565962	0.920466
Ccm3	chr3R	2665.52	2921.97	2427.98	2192.43	2096.37	1932.55	2784.82	2080.4	2301.45	2199.14	2186.78	2244.07	2671.82	2073.78	2388.89	2209.99	247.054	131.405	360.257	30.1498	0.161483	-0.204077	-0.112298	0.220458	0.177308	0.462832
Ccn	chr3L	0	0	1.07148	0	0.995899	0	0	2.02177	0.939369	0	0	1.06153	0.357161	0.331966	0.987045	0.353842	0.618621	0.574983	1.01173	0.612873	-1.46654	-1.57208	-1.48001	NA	NA	NA
Ccp84Aa	chr3R	2.30881	4.76926	1.07148	0	0	0	0	0	0	0	0	0	2.71652	0	0	0	1.8823	0	0	0	#DIV/0!	#DIV/0!	#DIV/0!	NA	NA	NA
Ccp84Ab	chr3R	32.3233	41.3336	15.0008	0	0	0	0	0	0	2.30276	0	0	29.5525	0	0	0.767587	13.3833	0	0	1.3295	#DIV/0!	#DIV/0!	#DIV/0!	0.022002	1	0.966697
Ccp84Ac	chr3R	0	0	0	0	0	0	0	1.01088	0	0	0	0	0	0	0.336961	0	0	0	0.583634	0	#NUM!	#NUM!	#NUM!	NA	NA	NA
Ccp84Ad	chr3R	1.1544	0	0	0	0	0	0	0	0	0	0	0	0.384801	0	0	0	0.666495	0	0	0	#DIV/0!	#DIV/0!	#DIV/0!	NA	NA	NA
Ccp84Ae	chr3R	1.1544	0	0	0	0	0	0	0	0	0	0	0	0.384801	0	0	0	0.666495	0	0	0	#DIV/0!	#DIV/0!	#DIV/0!	NA	NA	NA
Ccp84Af	chr3R	0	0	0	0	0	0	0	0	0	0	0	0	0	0	0	0	0	0	0	0	#DIV/0!	#DIV/0!	#DIV/0!	NA	NA	NA
Ccp84Ag	chr3R	64.6465	70.744	58.9316	0	0.995899	0	0	2.02177	3.75748	0.767587	0.959954	1.06153	64.7741	0.331966	1.92641	0.929689	5.90727	0.574983	1.88055	0.149289	5.07143	-2.53681	-1.0511	1.31079e-22	0.633587	0.662885
Ccs	chr2R	798.847	878.339	758.61	599.292	629.408	562.067	672.443	597.432	623.741	613.302	607.651	651.778	811.932	596.923	631.205	624.243	60.9276	33.7329	38.0583	24.012	0.363249	-0.0805655	-0.0160005	0.00047641	0.63274	0.929569
CCT1	chr3R	21495	22807.4	21078.2	18498.1	17208.1	18335.1	19625.6	17719.8	19705.1	19706.3	19580.2	21092.5	21793.5	18013.8	19016.8	20126.3	902.426	702.43	1123.99	839.137	0.196623	-0.0781779	0.0818067	0.00937973	0.457864	0.369939
CCT2	chrX	31433.2	33717.1	29987.6	26984.1	25078.7	28692.6	35186.8	28326	31218.1	24544.3	26180.8	28679.3	31712.6	26918.5	31576.9	26468.2	1880.38	1807.82	3444.48	2082.38	0.00618635	-0.230274	-0.254614	0.96585	0.0645123	0.0238158
CCT3	chr3R	21523.8	22014.9	19726	17372	16703.2	18443.7	17071.3	16430.9	18471.8	17795.7	17311.8	18892	21088.2	17506.3	17324.6	17999.8	1205.02	877.952	1043.76	809.623	0.283614	0.0150486	0.0551596	0.000435401	0.927499	0.610305
CCT4	chr2L	25931.3	27914.5	25263.4	23185.8	20340.2	22958.3	25980.5	21797.7	25622.2	22517.9	23827	26171.9	26369.8	22161.4	24466.8	24172.3	1378.83	1581.29	2318.47	1851.32	0.108058	-0.142775	-0.0174715	0.348844	0.281496	0.915918
CCT5	chr2R	26316.9	28684.7	25704.9	23073.8	21975.5	26452.4	23918	22667	28166	23770.6	23117.6	27732.4	26902.2	23833.9	24917	24873.5	1573.77	2333.2	2882.41	2497.27	0.11059	-0.0641183	-0.00252083	0.415665	0.735683	0.990808
CCT6	chrX	20236.7	22187.4	20592.8	20426	19619.2	20607.5	17820.9	18462.8	20264.1	20569	21607.6	22500.1	21005.6	20217.6	18849.3	21558.9	1038.81	526.074	1266.6	966.474	0.156269	0.101102	0.193777	0.0525064	0.32495	0.0175805
CCT7	chr3R	19060.3	20336.9	18980.3	17235.5	16223.2	17312.5	14494.3	15227.9	16504.7	18670	18461.8	20575.6	19459.2	16923.7	15409	19235.8	761.21	607.897	1017.34	1164.93	0.336677	0.135274	0.320021	1.61939e-05	0.173317	5.59773e-05
CCT8	chr2R	20816.2	22482.3	21339.7	20226.6	18070.6	20322.9	18552.8	17984.6	20339.2	20815.4	21272.6	22927.9	21546	19540	18958.9	21672	852.014	1273.5	1228.71	1111.44	0.18455	0.0435609	0.192958	0.0334187	0.751679	0.0322647
CCY	chrY	0	0	0	0	0	0	0	0	0	0	0	0	0	0	0	0	0	0	0	0	#DIV/0!	#DIV/0!	#DIV/0!	NA	NA	NA
Ccz1	chr3L	707.649	647.03	630.032	665.406	555.712	553.018	550.072	428.614	504.441	730.742	718.046	796.145	661.57	591.379	494.376	748.311	40.8002	64.1238	61.3513	41.9091	0.420285	0.258473	0.598029	0.00127842	0.10087	2.50531e-06
cd	chr3R	2.30881	7.15389	1.07148	3.19907	3.9836	1.00549	5.94031	2.02177	8.45432	11.5138	6.71968	7.43069	3.51139	2.72938	5.47213	8.55472	3.21459	1.54361	3.24173	2.58718	-0.640059	-1.00353	0.644618	0.656029	0.563699	0.517494
CD98hc	chr3R	12408.7	13266.5	12677.8	13399.8	13834	12539.4	12029.1	11731.3	10974.7	13726	14079.6	13212.8	12784.3	13257.8	11578.4	13672.8	438.721	658.89	543.617	435.85	0.142945	0.195407	0.23988	0.0533943	0.0136057	0.000823903
Cda4	chrX	0	3.17951	0	0	0	0	0	0	1.87874	0	0.959954	0	1.05984	0	0.626246	0.319985	1.83569	0	1.08469	0.55423	0.759039	#NUM!	-0.968727	NA	NA	NA
Cda5	chr2L	122.367	112.873	122.149	221.802	248.975	294.608	323.153	259.797	309.992	273.261	177.592	233.536	119.129	255.128	297.647	228.129	5.41973	36.7909	33.4332	48.0632	-1.32107	-0.222381	-0.383751	9.07485e-12	0.409276	0.0764495
Cda9	chr2R	0	0	0	0	0	0	0	0	0.939369	0.767587	0	0	0	0	0.313123	0.255862	0	0	0.542345	0.443166	#NUM!	#NUM!	-0.291363	NA	NA	NA
CDase	chr3R	21.9336	31.0002	24.6441	31.9907	18.9221	15.0823	16.6329	13.1415	15.0299	23.7952	27.8387	21.2305	25.8593	21.9984	14.9347	24.2881	4.65383	8.86402	1.74763	3.33153	0.792011	0.558723	0.701579	0.107743	0.409884	0.200441
cdc14	chr2L	1148.63	922.057	1187.2	1683.78	1713.94	2146.72	1697.74	1616.4	1544.32	1458.41	1414.01	1421.38	1085.96	1848.14	1619.49	1431.27	143.251	259.009	76.7548	23.7946	-0.576562	0.19054	-0.178242	4.26719e-06	0.243448	0.237118
Cdc16	chr3R	2667.82	2848.84	2634.78	2770.39	2724.78	2466.46	2213.36	2473.63	2322.12	2566.04	2752.19	2703.71	2717.15	2653.88	2336.37	2673.98	115.239	163.903	130.72	96.5688	0.217824	0.183833	0.19472	0.0102405	0.0627452	0.0303415
Cdc23	chr2L	989.323	962.596	998.622	921.331	913.24	959.235	849.464	1049.3	1032.37	1116.84	1073.23	1090.19	983.514	931.269	977.042	1093.42	18.7026	24.5551	110.81	21.9835	0.00952388	-0.0692239	0.162353	0.961551	0.644911	0.156232
Cdc27	chr3L	3946.9	4053.08	4160.57	4236.63	4459.64	4282.37	3528.54	4309.4	4057.14	4712.98	4763.29	4587.92	4053.52	4326.21	3965.02	4688.06	106.834	117.79	398.493	90.303	0.0318442	0.125775	0.241663	0.774636	0.25301	0.00621689
Cdc2rk	chr2R	608.37	562.773	627.889	704.861	629.408	679.709	517.995	553.964	567.379	712.32	641.249	740.946	599.677	671.326	546.446	698.172	33.4172	38.4187	25.5361	51.332	0.134108	0.296935	0.353504	0.288827	0.016041	0.00142616
Cdc37	chr3L	3843.01	4223.18	4048.06	3864.47	3853.13	3635.84	2961.84	3339.96	3644.75	3831.79	3819.66	4101.74	4038.08	3784.48	3315.52	3917.73	190.284	128.852	342.113	159.473	0.284437	0.190863	0.240785	0.00212357	0.0834047	0.0135545
Cdc42	chrX	7300.44	7355.79	7886.12	7701.22	7625.6	7313.91	6245.64	7001.38	6645.1	7542.31	6758.08	7303.31	7514.12	7546.91	6630.7	7201.23	323.348	205.294	378.075	401.955	0.180441	0.186724	0.119081	0.0231042	0.0356704	0.180256
CDC45L	chrX	4873.89	5409.14	4813.1	4760.21	5432.63	5007.33	3887.34	5021.06	4668.67	5858.22	6209.94	4856.49	5032.04	5066.72	4525.69	5641.55	327.985	340.121	580.227	702.262	0.153007	0.162916	0.317955	0.277718	0.333642	0.017099
Cdc5	chr3L	1205.2	1152.57	1362.93	1770.15	1803.57	1950.65	1770.21	2244.16	1949.19	1554.36	1711.6	1576.37	1240.23	1841.46	1987.85	1614.11	109.466	96.0256	239.329	85.1417	-0.680603	-0.110365	-0.300474	3.38623e-10	0.493025	0.0110596
CDC50	chrX	2374.61	2238.37	2535.13	2210.56	2132.22	2260.34	1934.16	2124.88	1969.86	2466.26	2341.33	2457.43	2382.7	2201.04	2009.63	2421.67	148.543	64.5858	101.387	69.72	0.245667	0.131252	0.269072	0.00241775	0.195868	0.000944755
Cdc6	chr3L	2580.09	2733.58	2711.92	2475.01	2897.07	2638.4	2392.76	2982.11	2826.56	3415.76	3515.35	2897.97	2675.2	2670.16	2733.81	3276.36	83.0753	212.814	305.427	331.459	-0.0312659	-0.0339853	0.261182	0.837188	0.86973	0.0348439
Cdc7	chrX	3226.56	2755.84	3313.03	4070.28	4394.9	4738.86	3498.84	4795.63	4391.55	4541.81	4565.54	4078.39	3098.47	4401.35	4228.67	4395.25	299.864	334.337	663.561	274.665	-0.448648	0.0577402	0.0557387	0.000513045	0.795437	0.768777
Cdep	chr3R	616.451	617.619	701.821	785.904	732.982	809.417	697.392	614.617	687.618	623.28	670.048	750.5	645.297	776.101	666.542	681.276	48.9549	39.1493	45.2335	64.3485	-0.0467328	0.219548	0.0315427	0.750195	0.116056	0.869946
CdGAPr	chr2L	1119.77	798.056	1152.92	1407.59	1683.07	1936.57	1166.68	1596.18	1360.21	1720.16	1644.4	1269.59	1023.58	1675.74	1374.36	1544.72	196.012	264.565	215.104	241.262	-0.42513	0.286045	0.168587	0.0280127	0.230301	0.474933
cdi	chr3R	3555.56	3609.54	4295.58	4951.09	5717.46	5385.39	4274.64	5327.35	5054.75	5242.62	5255.75	5500.83	3820.22	5351.31	4885.58	5333.07	412.551	384.318	546.363	145.438	-0.354873	0.131362	0.126435	0.00163417	0.396273	0.357539
cDIP	chr3R	24.2425	19.077	10.7148	11.7299	8.96309	13.0713	15.4448	27.2938	17.848	7.67587	1.91991	4.24611	18.0114	11.2548	20.1956	4.61396	6.82648	2.09493	6.26364	2.89556	-0.165124	-0.8435	-2.12996	0.803411	0.242653	0.0028565
Cdk1	chr2L	5813.57	6370.94	5558.85	5152.63	4643.88	4164.73	6894.32	5858.07	5528.19	5953.4	6282.9	5525.25	5914.45	4653.75	6093.53	5920.52	415.335	494.026	712.853	379.896	-0.043032	-0.388885	-0.041554	0.777028	0.00201793	0.813951
Cdk12	chr3L	2808.66	2327.4	3093.37	3848.48	3978.62	4305.5	4360.18	4826.97	4408.46	3269.15	3444.32	3345.93	2743.14	4044.2	4531.87	3353.13	387.166	235.461	256.699	87.8041	-0.724276	-0.164253	-0.434597	4.37172e-12	0.243486	7.1849e-05
Cdk2	chr3R	4148.92	4061.82	4309.5	4488.29	4919.74	4024.97	3208.95	4311.42	3894.62	5027.69	5232.71	4239.74	4173.42	4477.67	3805	4833.38	125.646	447.483	556.67	524.229	0.133333	0.234851	0.345137	0.371965	0.141629	0.0114595
CDK2AP1	chrX	1431.46	1264.65	1524.72	1641.12	1718.92	1655.03	1380.53	1756.92	1533.99	1800.76	1721.2	1417.14	1406.94	1671.69	1557.14	1646.36	131.758	41.4896	189.259	202.462	-0.146339	0.102407	0.0803817	0.307613	0.597443	0.641607
Cdk4	chr2R	2087.16	1747.14	2121.54	2482.48	2450.91	2590.14	1736.95	1888.33	1883.44	1898.24	1867.11	1771.69	1985.28	2507.84	1836.24	1845.68	206.95	72.9968	86.0237	65.9423	0.112589	0.449693	0.00740055	0.306885	3.30021e-06	0.964312
Cdk5	chr2R	980.088	1226.49	1027.55	1093.01	1139.31	1105.03	1240.34	1149.37	1219.3	1225.84	1326.66	1272.77	1078.05	1112.45	1203	1275.09	130.734	24.0225	47.6205	50.4504	-0.158224	-0.112899	0.0839554	0.17067	0.437497	0.526547
Cdk5alpha	chr2L	3.46321	2.38463	4.28593	2.13271	4.9795	1.00549	7.12837	16.1741	2.81811	3.83793	5.75973	1.06153	3.37792	2.7059	8.70687	3.55306	0.953516	2.04807	6.81649	2.36202	-1.36602	-1.68605	-1.29309	0.171246	0.171135	0.228694
Cdk7	chrX	3096.11	3111.15	2737.64	2645.63	2802.46	2591.14	2838.28	2950.77	2741.08	2991.28	2895.22	2920.26	2981.63	2679.74	2843.38	2935.59	211.437	109.713	104.937	49.8321	0.0684975	-0.0855097	0.0460456	0.455953	0.443729	0.669122
Cdk8	chr3L	810.391	795.672	702.893	698.463	744.933	668.649	582.15	679.314	608.711	842.042	891.798	884.252	769.652	704.015	623.392	872.697	58.2814	38.4436	50.2177	26.8146	0.304067	0.175467	0.485343	0.00517947	0.200001	3.66732e-06
Cdk9	chr2R	992.786	1020.62	1002.91	958.654	1080.55	946.164	722.341	925.969	872.674	1147.54	1234.5	956.436	1005.44	995.123	840.328	1112.83	14.0893	74.2459	105.597	142.246	0.258801	0.243922	0.405204	0.0608867	0.129271	0.00245389
Cdlc2	chr2L	0	0	1.07148	0	0	0	2.37612	0	0	0	0	0	0.357161	0	0.792041	0	0.618621	0	1.37185	0	-1.149	#NUM!	#NUM!	NA	NA	NA
cdm	chr3R	2875.62	2611.97	2858.72	3247.05	3431.87	3521.22	3244.6	3901	3418.36	3696.7	3902.21	3403.26	2782.1	3400.05	3521.32	3667.39	147.583	139.824	340.097	250.767	-0.339942	-0.0505618	0.0586371	0.00042673	0.749525	0.657604
Cds	chr3L	1959.02	1412.5	1880.45	2231.88	2252.72	2450.37	2187.22	2213.83	1885.31	2216.79	2178.14	1985.06	1750.66	2311.66	2095.46	2126.66	295.479	120.58	182.474	124.147	-0.259368	0.141665	0.0213253	0.0595017	0.439443	0.918428
CecA1	chr3R	68.1098	69.9492	100.719	67.1804	21.9098	19.1043	327.905	143.545	191.631	20.7248	14.3993	21.2305	79.5928	36.0648	221.027	18.7849	18.3193	26.9834	95.6305	3.80643	-1.47351	-2.61556	-3.55658	0.000194166	4.9281e-10	2.6822e-16
CecA2	chr3R	1.1544	4.76926	22.5011	0	0.995899	0	1.18806	0	2.81811	0	0	0	9.47494	0.331966	1.33539	0	11.4249	0.574983	1.41482	0	2.82686	-2.00815	#NUM!	0.0190135	0.822671	0.695262
CecB	chr3R	3.46321	0	2.14297	2.13271	0.995899	0	7.12837	2.02177	3.75748	0	0	0	1.86872	1.04287	4.30254	0	1.74782	1.06713	2.59657	0	-1.20313	-2.04463	#NUM!	0.341697	NA	0.063721
CecC	chr3R	3.46321	1.58975	2.14297	3.19907	0	1.00549	7.12837	10.1088	6.57558	0.767587	1.91991	2.12305	2.39864	1.40152	7.93759	1.60352	0.962541	1.63589	1.90055	0.731027	-1.72648	-2.50171	-2.30746	0.0565106	0.0337371	0.0273031
Ced-12	chr2L	1490.33	1407.73	1720.8	1619.79	1717.93	1780.72	1457.75	1962.12	1861.83	1576.62	1636.72	1650.67	1539.62	1706.15	1760.57	1621.34	162.253	81.1058	266.999	39.3493	-0.193466	-0.0453	-0.118855	0.151305	0.834455	0.44375
ced-6	chr2R	14410.4	14122.6	14948.3	14796.8	14409.7	13640.4	14948.2	15099.6	14563	13827.3	14192.9	14053.6	14493.7	14282.3	14870.3	14024.6	419.103	588.587	276.618	184.522	-0.0369995	-0.0582033	-0.0844711	0.597681	0.482052	0.209965
Cen	chr2L	6279.95	6194.48	6124.6	6737.24	7517.05	6910.71	6611.56	8219.49	6981.39	8044.31	8203.77	7117.54	6199.67	7055	7270.81	7788.54	77.8066	409.438	842.131	586.547	-0.229925	-0.0434712	0.0992355	0.0283399	0.802493	0.432089
CenB1A	chr3R	5395.68	4475.16	5594.21	5224.08	5408.73	6178.72	4759.37	5841.89	5622.12	5700.1	5277.83	5246.07	5155.02	5603.84	5407.8	5408	597.085	506.347	572.202	253.464	-0.0690643	0.0513751	5.33925e-05	0.633947	0.802634	1
CenG1A	chr2L	1273.31	1092.16	1447.57	1871.45	1909.14	2217.1	1873.57	2065.23	1826.13	1740.89	1508.09	1632.63	1271.01	1999.23	1921.65	1627.2	177.718	189.618	126.592	116.494	-0.596364	0.0571018	-0.239951	9.82085e-07	0.78503	0.0840808
Cenp-C	chr3R	2920.64	2204.99	3035.51	3989.24	4434.74	4341.69	3509.53	4598.51	4042.11	3932.35	3747.66	3609.19	2720.38	4255.22	4050.05	3763.07	450.022	235.002	544.531	162.127	-0.574131	0.0712956	-0.106031	1.87335e-05	0.751374	0.549527
Cep135	chr3L	932.757	969.75	1024.34	1132.47	1293.67	1151.28	930.252	1189.81	1119.73	1284.94	1253.7	1206.96	975.615	1192.48	1079.93	1248.53	46.0712	88.1432	134.278	39.2479	-0.146554	0.143022	0.209295	0.235456	0.346546	0.0937133
cep290	chr3L	15.0072	14.3078	12.8578	2.13271	0	0	3.56418	0	0.939369	11.5138	11.5195	4.24611	14.0576	0.710904	1.50118	9.09312	1.09634	1.23132	1.84732	4.19764	3.22718	-1.07837	2.59867	0.0010047	0.869697	0.0341002
Cep89	chr2R	1.1544	0.794877	2.14297	3.19907	0	0	1.18806	0	1.87874	0	0	0	1.36408	1.06636	1.02227	0	0.698076	1.84698	0.950279	0	0.416159	0.0609175	#NUM!	NA	NA	NA
Cep97	chr2L	1418.76	1432.37	1634.01	1704.04	1827.48	1703.3	1425.67	1853.96	1716.23	1998.03	2041.82	1803.53	1495.05	1744.94	1665.29	1947.79	120.539	71.4821	218.64	126.838	-0.15558	0.0674031	0.226071	0.222253	0.721992	0.0776646
cer	chr2R	1415.3	1512.65	1560.08	1101.55	1006.85	1069.84	2196.73	1676.04	1991.46	1400.85	1303.62	1504.18	1496.01	1059.41	1954.74	1402.88	73.8116	48.199	262.275	100.298	-0.385861	-0.883715	-0.478586	0.000780167	1.42252e-15	2.71984e-05
Cerk	chr3R	3131.89	2815.45	3247.67	3097.76	3066.37	3235.66	3033.12	2864.84	2905.47	2817.81	2913.46	2945.74	3065	3133.27	2934.48	2892.34	223.735	90.0531	87.809	66.5284	0.0627855	0.0945632	-0.0208683	0.498496	0.364398	0.861572
cert	chr3L	1783.55	1636.65	1664.01	1827.73	1885.24	1998.91	2376.12	2232.03	2255.43	1880.59	1819.11	1866.16	1694.74	1903.96	2287.86	1855.29	78.1216	87.1097	77.328	32.1477	-0.432935	-0.264995	-0.302355	1.89051e-09	0.000964682	5.01413e-05
cerv	chrX	965.081	1143.83	934.333	782.705	733.978	647.534	1223.7	898.675	1079.34	930.315	843.8	886.375	1014.41	721.406	1067.24	886.83	113.125	68.4571	162.851	43.2594	-0.0732354	-0.564999	-0.267152	0.685252	0.000123796	0.0867992
Cf2	chr2L	1361.04	999.955	1432.57	1787.21	1654.19	2147.72	1785.66	2096.57	1720.92	1555.9	1607.92	1557.26	1264.52	1863.04	1867.72	1573.69	231.897	255.355	200.819	29.6515	-0.562683	-0.0036171	-0.247121	0.000175229	0.99359	0.153476
Cfp1	chrX	1755.85	1701.83	1644.73	1620.86	1860.34	1559.51	1755.95	1815.55	1591.29	1632.66	1664.56	1578.49	1700.8	1680.24	1720.93	1625.24	55.567	158.961	116.157	43.5123	-0.0169744	-0.0345242	-0.0825398	0.899142	0.84224	0.502957
cg	chr2R	7447.05	6427.37	7856.11	8066.98	8769.89	9863.83	7528.74	8878.59	8254.24	7467.85	7374.37	7737.47	7243.51	8900.23	8220.52	7526.56	735.796	905.488	675.553	188.536	-0.182541	0.114613	-0.127239	0.11957	0.45957	0.337142
CG10000	chr3R	0	0	0	1.06636	0	0	0	1.01088	0	0	0	1.06153	0	0.355452	0.336961	0.353842	0	0.615661	0.583634	0.612873	#NUM!	0.0770726	0.0705246	NA	NA	NA
CG10005	chr3R	63.4921	81.8723	61.0745	56.5169	51.7868	44.2414	33.2657	28.3047	32.8779	13.8166	17.2792	19.1075	68.813	50.8484	31.4828	16.7344	11.3741	6.19128	2.7591	2.6872	1.12812	0.691638	-0.911746	0.000199411	0.0700387	0.0245439
CG10011	chr3R	416.739	281.386	371.805	586.496	735.97	778.247	595.219	756.141	595.56	404.518	324.465	355.612	356.643	700.237	648.973	361.531	68.9384	100.746	92.8099	40.3538	-0.863676	0.109685	-0.844038	1.09348e-06	0.700161	2.65213e-06
CG10013	chr3R	109.668	67.5645	94.2905	41.5879	51.7868	58.3183	52.2747	53.5768	55.4228	174.242	133.434	135.875	90.5078	50.5643	53.7581	147.85	21.3052	8.43192	1.58186	22.8885	0.751559	-0.0883629	1.45958	0.00837105	0.86981	6.52938e-09
CG10014	chr3R	0	0	0	0	0	0	0	0	0	0	1.91991	0	0	0	0	0.63997	0	0	0	1.10846	#DIV/0!	#DIV/0!	#DIV/0!	NA	NA	NA
CG10019	chr2L	9.23522	6.35901	10.7148	70.3795	55.7704	71.3896	54.6508	38.4136	37.5748	23.7952	37.4382	53.0763	8.76969	65.8465	43.5464	38.1032	2.21491	8.74078	9.62586	14.6519	-2.31196	0.596553	-0.192639	1.06765e-06	0.170492	0.703657
CG10026	chr2L	24.2425	17.4873	24.6441	13.8626	14.9385	20.1097	9.50449	9.09795	6.57558	9.21104	7.67963	9.55374	22.1246	16.3036	8.39267	8.81481	4.02106	3.33981	1.58672	0.997908	1.39845	0.95799	0.0707981	0.00990838	0.173085	0.958103
CG10029	chr3R	0	0	0	0	0	0	0	0	0	0	0	0	0	0	0	0	0	0	0	0	#DIV/0!	#DIV/0!	#DIV/0!	NA	NA	NA
CG10031	chr2L	4.61761	11.1283	9.64335	3.19907	9.95899	3.01646	0	5.05442	2.81811	3.83793	1.91991	2.12305	8.46308	5.39151	2.62417	2.62697	3.41203	3.95661	2.53278	1.05364	1.68932	1.03882	0.00153333	0.112583	0.561139	0.986329
CG10035	chr3R	0	12.718	0	0	11.9508	0	7.12837	8.08707	11.2724	0	0	0	4.23934	3.9836	8.82929	0	7.34276	6.89979	2.16944	0	-1.05846	-1.14823	#NUM!	0.731435	0.782761	0.498364
CG10038	chr3R	1045.89	1224.11	1122.91	982.114	910.252	797.351	1151.23	979.546	853.887	1362.47	1359.3	1355.57	1130.97	896.572	994.888	1359.11	89.3836	93.1377	149.265	3.45185	0.184956	-0.150114	0.450057	0.184449	0.411731	0.000532891
CG10041	chr3R	1.1544	3.17951	0	4.26542	1.9918	0	4.75224	0	0.939369	0.767587	0.959954	3.18458	1.44464	2.08574	1.8972	1.63737	1.6095	2.13426	2.51675	1.34337	-0.393169	0.136684	-0.212492	0.910095	NA	0.946581
CG10050	chr3R	644.157	730.492	682.535	488.391	541.769	437.387	516.807	521.616	476.26	788.311	865.879	714.408	685.728	489.182	504.894	789.533	43.2561	52.1956	24.9141	75.743	0.441655	-0.0456087	0.645018	0.000330515	0.843441	6.91021e-08
CG10051	chr2R	0	0	0	0	0	0	2.37612	0	0	0	0	0	0	0	0.792041	0	0	0	1.37185	0	#NUM!	#NUM!	#NUM!	NA	NA	NA
CG10053	chr3R	278.211	298.874	301.087	282.584	246.983	245.339	193.654	226.438	234.842	310.873	310.065	295.104	292.724	258.302	218.311	305.347	12.6171	21.0451	21.7635	8.87983	0.423153	0.242672	0.484064	0.00295184	0.182501	0.000657726
CG10055	chr3R	3789.9	3906.82	3853.05	4011.63	3874.05	4063.17	3692.49	4068.8	3903.08	3761.94	3523.03	3771.61	3849.93	3982.95	3888.13	3685.53	58.5208	97.7705	188.6	140.807	-0.0142445	0.0347626	-0.0772043	0.875973	0.758432	0.346001
CG10062	chr2R	102.742	78.6928	105.005	86.3748	81.6637	80.439	78.412	30.3265	57.3015	26.0979	50.8776	44.5841	95.48	82.8258	55.3467	40.5199	14.5821	3.13392	24.1023	12.8801	0.786701	0.581584	-0.449867	0.0277859	0.179769	0.317807
CG10063	chr3L	45.0217	36.5643	43.9308	38.3888	44.8155	33.1811	43.9583	28.3047	41.3322	43.7524	34.5584	36.0919	41.8389	38.7951	37.8651	38.1342	4.6004	5.82782	8.38297	4.92555	0.143979	0.0350071	0.0102188	0.739815	0.953827	0.971096
CG10064	chr3L	5.77201	3.97438	5.35742	5.33178	2.9877	6.03292	2.37612	2.02177	1.87874	3.07035	2.87986	4.24611	5.0346	4.78413	2.09221	3.39877	0.941288	1.59477	0.256065	0.739969	1.26685	1.19323	0.699987	0.303748	0.438881	0.702317
CG10068	chr3R	992.786	996.776	937.548	988.512	939.133	906.95	1037.18	908.784	949.702	1009.38	1045.39	1026.5	975.703	944.865	965.221	1027.09	33.1037	41.0822	65.5885	18.0142	0.0155826	-0.0307518	0.0896278	0.88474	0.854791	0.408029
CG10073	chr2R	0	2.38463	0	5.33178	4.9795	7.03841	3.56418	2.02177	0	1.53517	4.79977	2.12305	0.794877	5.78323	1.86198	2.81933	1.37677	1.1012	1.78746	1.74012	-1.22804	1.63503	0.598514	0.732618	0.24465	0.779809
CG10075	chr3L	1165.95	1212.19	1010.41	949.057	893.322	815.45	1025.3	810.728	899.916	984.046	1036.75	920.344	1129.51	885.943	911.98	980.38	105.708	67.1082	107.792	58.2899	0.308628	-0.0417891	0.104339	0.0132995	0.854993	0.500737
CG10077	chr3L	11400.9	10257.1	12033.8	11593.4	11504.6	12007.5	11002.6	11713.1	11236.7	11573.7	11298.7	11841.3	11230.6	11701.9	11317.5	11571.2	900.524	268.415	362.053	271.344	-0.0111193	0.0481835	0.031987	0.912849	0.687963	0.771442
CG10081	chr2R	0	0.794877	0	0	0	0	0	0	0	0	0	0	0.264959	0	0	0	0.458922	0	0	0	#DIV/0!	#DIV/0!	#DIV/0!	NA	NA	NA
CG10082	chr2R	1303.32	1172.44	1419.72	1737.09	1944.99	1935.56	1887.83	2272.47	2013.07	1538.24	1730.8	1582.74	1298.49	1872.55	2057.79	1617.26	123.707	117.403	196.179	100.812	-0.664256	-0.13609	-0.347543	4.24502e-10	0.361548	0.00216507
CG10086	chr3R	0	1.58975	5.35742	0	5.9754	0	1.18806	2.02177	5.63622	0.767587	3.83982	1.06153	2.31572	1.9918	2.94868	1.88964	2.7515	3.4499	2.36451	1.69528	-0.348607	-0.565998	-0.641956	0.857875	0.841487	0.780959
CG10089	chr3L	105.051	50.0772	82.5042	33.057	25.8934	40.2195	41.5821	47.5115	46.9685	62.1745	66.2368	62.6301	79.2107	33.0566	45.354	63.6805	27.6343	7.16306	3.27782	2.22556	0.804464	-0.456291	0.48962	0.0186284	0.347191	0.206243
CG10096	chr3R	0	0	0	0	0	0	0	0	0	0	0	0	0	0	0	0	0	0	0	0	#DIV/0!	#DIV/0!	#DIV/0!	NA	NA	NA
CG10097	chr3R	0	0	0	0	0	0	0	0	0	0	0	0	0	0	0	0	0	0	0	0	#DIV/0!	#DIV/0!	#DIV/0!	NA	NA	NA
CG10098	chr3R	1707.36	2057.14	1770.09	1601.67	1725.89	1581.63	2041.09	1709.4	1812.04	2054.06	2164.7	1999.92	1844.86	1636.4	1854.18	2072.89	186.494	78.1507	169.81	83.9884	-0.00726563	-0.180257	0.160865	0.97358	0.173182	0.182766
CG10103	chr3L	1915.15	1868.76	1951.17	1875.72	1881.25	1869.2	1921.1	1933.82	2000.86	1967.32	1860.39	1911.81	1911.69	1875.39	1951.92	1913.18	41.3165	6.0331	42.852	53.4796	-0.0300456	-0.0577049	-0.0289276	0.706756	0.549233	0.76204
CG10104	chr2R	0	0	0	0	0	0	0	0	0	0	0	0	0	0	0	0	0	0	0	0	#DIV/0!	#DIV/0!	#DIV/0!	NA	NA	NA
CG10116	chr3L	0	0	1.07148	0	0	2.01097	0	0	0	0	0	0	0.357161	0.670325	0	0	0.618621	1.16104	0	0	#DIV/0!	#DIV/0!	#DIV/0!	NA	NA	NA
CG10126	chr3R	128.139	115.257	124.292	70.3795	69.7129	61.3347	181.773	135.458	153.117	167.334	109.435	141.183	122.563	67.1424	156.783	139.317	6.61262	5.04061	23.3741	28.9946	-0.35525	-1.22347	-0.170395	0.130797	1.42868e-07	0.567004
CG10132	chr2L	3.46321	13.5129	5.35742	5.33178	15.9344	9.04939	24.9493	13.1415	15.0299	3.07035	9.59954	8.49222	7.44451	10.1052	17.7069	7.05403	5.34005	5.37958	6.34277	3.49412	-1.25006	-0.809215	-1.32779	0.111434	0.375403	0.0934425
CG10137	chr2L	54.2569	36.5643	47.1453	35.1897	41.8278	78.428	42.7702	35.3809	37.5748	52.9635	69.1167	60.507	45.9888	51.8152	38.5753	60.8624	8.9028	23.2851	3.79489	8.08248	0.253606	0.425697	0.657874	0.588422	0.395146	0.10125
CG10139	chr2R	800.001	909.339	826.113	748.582	805.682	604.298	621.356	723.792	655.68	974.067	1020.43	909.729	845.151	719.521	666.943	968.076	57.1011	103.79	52.1387	55.5941	0.341647	0.109473	0.537557	0.00932506	0.57558	2.509e-05
CG10140	chr3L	1.1544	0.794877	0	0	0	1.00549	0	0	0	0	0	0	0.64976	0.335162	0	0	0.590725	0.580518	0	0	#DIV/0!	#DIV/0!	#DIV/0!	NA	NA	NA
CG10147	chr3L	200.866	165.334	226.083	180.214	158.348	199.086	104.549	125.35	127.754	161.193	182.391	175.152	197.428	179.216	119.218	172.912	30.5199	20.3876	12.7599	10.7751	0.727726	0.588102	0.536441	0.000165622	0.00644552	0.00916991
CG10151	chr2R	75.0362	71.5389	79.2897	28.7916	24.8975	33.1811	8.31643	13.1415	7.51495	29.9359	27.8387	7.43069	75.2883	28.9567	9.65762	21.7351	3.88156	4.14427	3.04361	12.4323	2.96269	1.58416	1.17029	3.54318e-11	0.0107537	0.0692097
CG10154	chr3L	0	0	0	0	9.95899	0	0	0	0	0	0	0	0	3.31966	0	0	0	5.74983	0	0	#DIV/0!	#DIV/0!	#DIV/0!	NA	NA	NA
CG10163	chr3L	2545.46	2988.74	2186.9	3054.04	2716.81	2394.07	3208.95	1843.85	2512.81	1766.22	1444.73	2228.15	2573.7	2721.64	2521.87	1813.03	401.665	330.016	682.596	393.799	0.029347	0.109981	-0.476092	0.917935	0.746867	0.035618
CG10164	chr3R	0	0	0	0	0	0	0	0	0	0	0	0	0	0	0	0	0	0	0	0	#DIV/0!	#DIV/0!	#DIV/0!	NA	NA	NA
CG10165	chr2L	570.275	635.107	513.24	568.368	564.675	500.733	604.723	483.202	495.987	607.161	641.249	673.008	572.874	544.592	527.971	640.473	60.9747	38.0279	66.7762	32.9304	0.11776	0.044717	0.278679	0.426049	0.842953	0.052325
CG10166	chr2L	1583.84	1623.93	1482.93	1362.8	1339.48	1238.76	1243.9	1195.87	1180.79	1509.84	1439.93	1570	1563.57	1313.68	1206.85	1506.59	72.6533	65.9237	32.9578	65.0944	0.373591	0.122365	0.320036	4.01458e-06	0.259215	0.000119552
CG10171	chr3L	1625.4	1714.55	1532.22	1638.99	1822.5	1619.84	1921.1	1922.7	1966.1	1789.24	1710.64	1567.88	1624.06	1693.77	1936.63	1689.25	91.1717	111.886	25.5329	112.223	-0.253948	-0.193307	-0.197164	0.00540483	0.0687917	0.04352
CG10175	chr3R	199.712	191.565	177.866	186.612	183.245	234.279	223.356	137.48	189.753	168.869	119.034	176.213	189.714	201.379	183.529	154.706	11.0397	28.5417	43.2746	31.1097	0.0478178	0.1339	-0.246486	0.867221	0.699458	0.381727
CG10177	chr3R	0	0	0	0	0	1.00549	0	0	0	0	0	0	0	0.335162	0	0	0	0.580518	0	0	#DIV/0!	#DIV/0!	#DIV/0!	NA	NA	NA
CG10182	chr3R	1.1544	0	2.14297	0	0.995899	2.01097	0	0	0	1.53517	1.91991	1.06153	1.09912	1.00229	0	1.50554	1.07255	1.0055	0	0.429958	#DIV/0!	#DIV/0!	#DIV/0!	NA	NA	NA
CG10183	chr3R	0	0	0	0	0	0	0	0	0	0	0	0	0	0	0	0	0	0	0	0	#DIV/0!	#DIV/0!	#DIV/0!	NA	NA	NA
CG10184	chr3R	896.971	1057.98	961.12	680.335	551.728	690.77	710.461	622.704	703.588	419.87	410.86	478.749	972.024	640.944	678.917	436.493	81.0571	77.4394	48.8033	36.8707	0.517756	-0.0830371	-0.637278	3.8947e-05	0.68906	8.02752e-07
CG10185	chr3R	2.30881	0.794877	0	0	0	2.01097	2.37612	5.05442	2.81811	0.767587	0	0	1.03456	0.670325	3.41622	0.255862	1.17292	1.16104	1.43583	0.443166	-1.72338	-2.34947	-3.73896	0.237057	NA	0.113283
CG10188	chr2L	1466.09	1289.29	1832.24	2145.51	2343.35	2741.96	2060.1	2753.65	2414.18	2257.47	2410.45	1983.99	1529.21	2410.27	2409.31	2217.3	276.921	303.807	346.8	216.045	-0.655836	0.000578621	-0.119812	2.99708e-05	1	0.565588
CG10189	chr2L	401.732	391.874	395.377	430.808	380.433	401.189	355.23	323.483	317.507	370.744	368.622	418.242	396.328	404.144	332.073	385.869	4.99718	25.3167	20.276	28.0552	0.255193	0.283366	0.216611	0.0423744	0.0431859	0.111072
CG10194	chr2L	722.656	745.594	796.112	770.975	786.76	680.715	641.553	646.965	614.347	792.149	710.366	689.993	754.787	746.15	634.289	730.836	37.5809	57.2156	17.4802	54.0672	0.250931	0.234327	0.204408	0.0222321	0.0628607	0.0786462
CG10195	chr2L	470.996	538.927	486.453	486.258	485.999	457.497	598.783	460.963	449.958	492.023	536.614	513.779	498.792	476.585	503.234	514.139	35.6064	16.5311	82.9301	22.2979	-0.0127924	-0.0784985	0.0309272	0.972867	0.732258	0.871843
CG10205	chr2R	0	0	0	0	0	0	0	0	0	0	0	0	0	0	0	0	0	0	0	0	#DIV/0!	#DIV/0!	#DIV/0!	NA	NA	NA
CG10208	chr3R	145.455	164.54	146.793	81.043	90.6268	100.549	153.26	137.48	160.632	217.995	221.749	202.752	152.262	90.7395	150.457	214.165	10.6533	9.75333	11.8277	10.0612	0.0172054	-0.729552	0.509369	0.926322	0.000181416	0.00291272
CG10209	chr2R	1411.83	1361.62	1529.01	1459.84	1478.91	1445.89	1412.6	1560.8	1434.42	1488.35	1339.14	1492.51	1434.15	1461.55	1469.28	1440	85.8945	16.5758	80.0128	87.3734	-0.0349037	-0.00760796	-0.0290379	0.747475	0.966466	0.828999
CG10211	chr2L	25.3969	17.4873	32.1445	38.3888	24.8975	36.1975	52.2747	44.4789	38.5141	15.3517	15.3593	29.7228	25.0095	33.1613	45.0892	20.1446	7.33627	7.24004	6.90055	8.29494	-0.850304	-0.443283	-1.16239	0.0421112	0.416224	0.0068855
CG10214	chr3R	1515.73	1500.73	1521.51	1297.76	1272.76	1311.16	1109.65	1274.72	1232.45	1215.09	1370.81	1101.86	1512.65	1293.89	1205.61	1229.26	10.7253	19.4877	85.7488	135.033	0.327321	0.101953	0.0280244	0.00116752	0.486186	0.860083
CG10217	chr3R	4099.28	4270.08	4456.3	4570.4	4863.97	4816.28	4397.01	4947.26	4999.32	4808.93	4508.91	4353.32	4275.22	4750.22	4781.2	4557.05	178.563	157.541	333.731	231.589	-0.161374	-0.00937877	-0.0692718	0.0582457	0.952202	0.505166
CG10222	chr3L	1159.02	1371.16	1026.48	946.924	922.203	813.439	1169.05	1066.48	1130.06	1080.76	1160.58	1003.14	1185.55	894.189	1121.87	1081.5	173.866	71.0151	51.7741	78.7235	0.0796628	-0.327248	-0.0528701	0.591263	0.0236085	0.77696
CG10226	chr3L	23.0881	35.7695	39.6449	41.5879	38.8401	47.2579	93.8568	128.382	119.3	49.1255	55.6773	70.0608	32.8341	42.5619	113.846	58.2879	8.65992	4.29262	17.8971	10.709	-1.79382	-1.41945	-0.965819	1.70884e-10	6.22297e-07	0.000370224
CG10232	chr3R	0	0	0	0	0	0	1.18806	1.01088	1.87874	0	0	0	0	0	1.35923	0	0	0	0.458548	0	#NUM!	#NUM!	#NUM!	NA	NA	NA
CG10237	chr2L	9409.54	10516.2	9724.78	8991.51	9707.03	8743.72	7034.51	8021.36	8151.85	11675.8	10647.8	11358.3	9883.51	9147.42	7735.91	11227.3	570.162	500.223	610.919	526.352	0.353454	0.241795	0.537369	5.18958e-05	0.0155755	2.20141e-10
CG1024	chr3R	1037.81	997.57	1035.05	1170.86	1191.1	1233.73	1119.15	1297.97	1224	1166.73	1260.42	1158.13	1023.48	1198.56	1213.71	1195.09	22.478	32.0952	89.8531	56.7387	-0.245943	-0.0181172	-0.0222998	0.00595287	0.911031	0.862127
CG10252	chr3R	0	0	0	0	0	0	0	0	0	0.767587	0	0	0	0	0	0.255862	0	0	0	0.443166	#DIV/0!	#DIV/0!	#DIV/0!	NA	NA	NA
CG10254	chr3R	24327.9	21880.6	26033.8	28054.8	27580.4	31095.7	25563.5	28771.8	26904.5	28288.6	27943.3	29069.9	24080.8	28910.3	27079.9	28434	2087.62	1907.42	1611.3	577.19	-0.169342	0.0943601	0.0703915	0.0732665	0.455811	0.544638
CG10257	chr2R	1.1544	0	1.07148	0	0	0	0	0	0	0.767587	0.959954	0	0.741962	0	0	0.575847	0.643894	0	0	0.507889	#DIV/0!	#DIV/0!	#DIV/0!	NA	NA	NA
CG10264	chr3R	0	0.794877	0	0	0	4.02195	8.31643	5.05442	0.939369	0	0.959954	0	0.264959	1.34065	4.77007	0.319985	0.458922	2.32207	3.69674	0.55423	-4.17017	-1.83108	-3.89794	0.0711205	NA	0.0891181
CG10265	chr2R	791.92	887.877	763.967	993.844	1131.34	813.439	756.795	1001.79	892.401	1075.39	1155.78	921.405	814.588	979.541	883.66	1050.86	64.9908	159.433	122.729	119.1	-0.117421	0.148615	0.250006	0.530725	0.513925	0.161644
CG10268	chr2L	526.408	515.08	480.024	478.794	469.069	473.584	496.61	457.93	545.774	551.127	539.494	518.025	507.171	473.816	500.104	536.216	24.182	4.86675	44.0259	16.7928	0.0202421	-0.0779036	0.100584	0.897479	0.642974	0.461306
CG10274	chr3L	516.018	426.054	500.383	663.273	755.887	817.461	785.308	722.782	583.348	723.067	754.524	700.608	480.818	745.541	697.146	726.066	48.0672	77.6129	103.392	27.083	-0.53597	0.096826	0.05864	0.000154858	0.650788	0.766479
CG10280	chr3R	1.1544	2.38463	4.28593	0	0.995899	0	0	2.02177	1.87874	0.767587	0	1.06153	2.60832	0.331966	1.30017	0.609705	1.5777	0.574983	1.12825	0.548092	1.00442	-1.96959	-1.09252	NA	NA	0.731387
CG10283	chr2L	899.28	821.108	909.689	983.18	869.42	915.999	750.855	584.291	625.62	780.636	598.052	798.268	876.692	922.866	653.588	725.652	48.4181	57.1901	86.7328	110.856	0.423688	0.497739	0.150895	0.00303861	0.0010175	0.383821
CG10286	chr3R	1672.73	1391.03	1882.6	1867.19	1608.38	2025.05	1314	1237.32	1430.66	1512.91	1906.47	1747.27	1648.79	1833.54	1327.33	1722.22	246.654	210.365	97.356	197.971	0.312883	0.466109	0.375746	0.0373272	0.00278331	0.013372
CG10298	chr3R	0	0	0	0	0	0	0	0	0	0	0	0	0	0	0	0	0	0	0	0	#DIV/0!	#DIV/0!	#DIV/0!	NA	NA	NA
CG10300	chr3R	0	0	0	0	0	0	0	0	0	0	0	0	0	0	0	0	0	0	0	0	#DIV/0!	#DIV/0!	#DIV/0!	NA	NA	NA
CG10301	chr3R	0	0	0	0	0	0	0	0	0	0	0	0	0	0	0	0	0	0	0	0	#DIV/0!	#DIV/0!	#DIV/0!	NA	NA	NA
CG10307	chr2R	11.544	7.94877	8.57186	5.33178	11.9508	9.04939	9.50449	15.1632	5.63622	3.07035	2.87986	4.24611	9.35489	8.77732	10.1013	3.39877	1.92128	3.31788	4.79148	0.739969	-0.110752	-0.202691	-1.57146	0.897171	0.87479	0.0957363
CG10311	chr3R	96.9698	121.616	113.577	100.237	76.6842	80.439	136.627	127.371	150.299	80.5966	95.0355	79.6145	110.721	85.7869	138.099	85.0822	12.569	12.6546	11.5346	8.63377	-0.318775	-0.686875	-0.698775	0.163502	0.00283125	0.00111939
CG10317	chr3R	0	0	0	0	0	0	0	1.01088	0	0	0	0	0	0	0.336961	0	0	0	0.583634	0	#NUM!	#NUM!	#NUM!	NA	NA	NA
CG10321	chr2R	1479.94	1271.8	1570.79	2013.28	2084.42	2419.2	1778.53	2237.08	1932.28	1983.44	2034.14	1976.56	1440.85	2172.3	1982.63	1998.05	153.282	216.762	233.388	31.4463	-0.460499	0.131807	0.0111761	0.00012959	0.439464	0.957362
CG10324	chr3R	563.348	552.439	595.745	627.017	602.519	461.519	470.472	543.855	475.321	650.913	649.889	633.732	570.511	563.685	496.549	644.845	22.5235	89.3225	41.0396	9.63785	0.200317	0.182952	0.377014	0.174139	0.30614	0.0066624
CG10332	chr2R	0	0	0	0	0	0	0	0	0	0	0	0	0	0	0	0	0	0	0	0	#DIV/0!	#DIV/0!	#DIV/0!	NA	NA	NA
CG10333	chr2L	1310.25	1426.01	1484	1545.15	1669.13	1657.04	1186.87	1388.95	1473.87	1604.26	1568.57	1739.84	1406.75	1623.77	1349.9	1637.55	88.4646	68.3575	147.431	90.3636	0.0595179	0.266499	0.278692	0.653228	0.0266784	0.0119979
CG10336	chr2L	2174.89	2433.12	2150.47	1785.08	1882.25	1570.57	1753.58	2004.58	1907.86	2350.35	2537.16	2051.93	2252.83	1745.97	1888.67	2313.15	156.614	159.478	126.597	244.744	0.254363	-0.113347	0.292484	0.0317649	0.489993	0.0154903
CG10337	chr2L	173.16	165.334	197.153	193.01	174.282	170.933	185.338	136.469	142.784	161.193	177.592	182.583	178.549	179.409	154.864	173.789	16.5796	11.898	26.5794	11.1902	0.205323	0.21225	0.166339	0.304692	0.375321	0.452516
CG10338	chr2L	1234.06	1099.31	1182.92	1208.18	1348.45	1377.52	1462.5	1336.39	1290.69	1281.87	1291.14	1265.34	1172.1	1311.38	1363.19	1279.45	68.0195	90.5488	88.9867	13.0684	-0.217901	-0.0559036	-0.0914686	0.0237991	0.717162	0.438967
CG10339	chr2R	1.1544	0	3.21445	1.06636	0	0	0	1.01088	0	0	0	0	1.45628	0.355452	0.336961	0	1.62835	0.615661	0.583634	0	2.11164	0.0770726	#NUM!	NA	NA	NA
CG10340	chr3R	1972.87	1903.73	1871.88	1672.05	1587.46	1640.96	1563.49	1505.21	1545.26	1743.19	1766.32	1839.63	1916.16	1633.49	1537.99	1783.04	51.6314	42.7829	29.8154	50.3477	0.317177	0.0869142	0.2133	2.87556e-06	0.358367	0.00294465
CG10341	chr2L	1245.6	1088.98	1426.14	1505.69	1351.44	1676.15	895.798	933.045	1021.09	1585.07	1756.72	1509.49	1253.58	1511.09	949.979	1617.09	168.723	162.423	64.3417	126.686	0.400081	0.669624	0.767433	0.00258608	3.38078e-07	8.38956e-10
CG10343	chr2L	1376.05	1584.19	1401.5	1282.83	1303.63	1157.32	1298.55	1268.66	1276.6	1413.89	1318.98	1363	1453.91	1247.92	1281.27	1365.29	113.539	79.1561	15.4833	47.5001	0.182365	-0.0380445	0.0916329	0.0548712	0.811545	0.417192
CG10344	chr2R	759.597	714.594	803.612	967.185	980.961	937.114	828.079	782.424	788.131	1041.62	1078.03	891.683	759.268	961.753	799.544	1003.78	44.5099	22.4222	24.8757	98.7678	-0.0745692	0.266489	0.328187	0.543559	0.0226566	0.00162658
CG10345	chr3R	1.1544	0	0	0	0.995899	1.00549	1.18806	0	0	0	0	0	0.384801	0.667129	0.39602	0	0.666495	0.57777	0.685927	0	-0.0414628	0.752391	#NUM!	NA	NA	NA
CG10347	chrX	915.441	994.391	979.336	1159.13	989.924	1168.38	1382.9	971.459	1071.82	977.905	1065.55	1270.65	963.056	1105.81	1142.06	1104.7	41.917	100.467	214.527	150.247	-0.245948	-0.0465364	-0.0479838	0.136991	0.86981	0.837629
CG10348	chr2L	0	0	0	0	0	0	0	0	0	0	0	0	0	0	0	0	0	0	0	0	#DIV/0!	#DIV/0!	#DIV/0!	NA	NA	NA
CG10352	chrX	3.46321	0	0	2.13271	4.9795	3.01646	1.18806	2.02177	0.939369	0	0	3.18458	1.1544	3.37622	1.38307	1.06153	1.99948	1.45709	0.566936	1.83862	-0.260723	1.28754	-0.381729	0.918989	NA	0.906182
CG10353	chrX	1708.52	1333.01	1672.59	1754.16	1849.38	1902.38	1527.85	1706.37	1658.93	1724.77	1637.68	1580.61	1571.37	1835.31	1631.05	1647.69	207.207	75.1093	92.4695	72.5957	-0.0537764	0.170223	0.0146435	0.683195	0.228657	0.936033
CG10357	chr3L	0	0	0	0	0.995899	0	0	0	0	0	0	0	0	0.331966	0	0	0	0.574983	0	0	#DIV/0!	#DIV/0!	#DIV/0!	NA	NA	NA
CG10359	chr3L	3.46321	3.17951	4.28593	5.33178	4.9795	4.02195	5.94031	9.09795	9.39369	3.07035	2.87986	2.12305	3.64288	4.77774	8.14398	2.69109	0.574679	0.677822	1.91416	0.501067	-1.16065	-0.769406	-1.59755	0.168277	0.442777	0.0919588
CG10361	chr3L	17.316	42.9233	31.073	7.46449	4.9795	16.0878	10.6926	7.07618	10.3331	8.44345	11.5195	8.49222	30.4375	9.51059	9.36727	9.48504	12.8155	5.82996	1.99226	1.76202	1.70015	0.0219076	0.0180259	0.00218167	0.990767	0.999971
CG10362	chrX	0	4.76926	1.07148	4.26542	1.9918	1.00549	1.18806	0	0	1.53517	0.959954	2.12305	1.94691	2.4209	0.39602	1.53939	2.50225	1.67179	0.685927	0.581561	2.29754	2.6119	1.95872	0.421366	NA	0.633899
CG10365	chr3R	1558.44	1299.62	1549.36	1330.81	1197.07	1336.29	1298.55	1154.43	1183.61	1200.51	1026.19	1154.94	1469.14	1288.06	1212.19	1127.21	146.879	78.8453	76.196	90.4048	0.277354	0.0875764	-0.104862	0.016156	0.603726	0.466267
CG10366	chr2L	871.574	823.492	967.549	1046.1	1107.44	1094.98	1015.79	1176.67	1037.06	1115.3	1215.3	1099.74	887.539	1082.84	1076.51	1143.45	73.3433	32.4239	87.3907	62.7111	-0.278477	0.00845685	0.0870331	0.00764262	0.971326	0.509413
CG10375	chr3R	1628.86	1881.47	1552.58	1280.69	1223.96	1009.51	2220.49	1675.03	1900.34	1537.48	1503.29	1550.89	1687.64	1171.39	1931.95	1530.55	172.145	143.032	274.097	24.545	-0.195056	-0.721843	-0.336009	0.18538	6.98347e-08	0.0179461
CG10376	chr2L	1619.63	1607.24	1697.23	1683.78	1887.23	1802.84	1594.38	1956.06	1765.07	2036.41	1859.43	1747.27	1641.37	1791.28	1771.84	1881.04	48.774	102.218	180.935	145.773	-0.11035	0.0157456	0.0862823	0.34552	0.9409	0.513867
CG10383	chr2L	984.705	922.057	1108.99	1334.01	1482.89	1418.74	1303.3	1665.94	1506.75	1644.94	1767.28	1645.37	1005.25	1411.88	1492	1685.86	95.1422	74.678	181.766	70.5083	-0.56969	-0.0796233	0.176242	3.84146e-07	0.652344	0.185284
CG10384	chr2R	0	0	0	0	0	0	0	0	0	0	0	0	0	0	0	0	0	0	0	0	#DIV/0!	#DIV/0!	#DIV/0!	NA	NA	NA
CG10395	chr2R	2331.89	2358.4	2035.82	1895.98	2011.72	1491.14	2005.45	1853.96	1711.53	2269.75	2343.25	2086.96	2242.04	1799.61	1856.98	2233.32	179.082	273.342	146.982	131.97	0.271852	-0.0452722	0.266233	0.0396708	0.843841	0.0547499
CG10405	chr3R	18.4704	17.4873	17.1437	21.3271	20.9139	23.1262	10.6926	11.1197	25.363	12.2814	9.59954	6.36916	17.7005	21.7891	15.7251	9.4167	0.688571	1.17628	8.34939	2.96035	0.170722	0.470537	-0.739774	0.825427	0.535967	0.291361
CG10407	chr3R	7299.29	7265.97	7049.29	5349.91	5089.04	4807.23	7695.07	5048.35	6553.98	5448.33	4293.88	6380.84	7204.85	5082.06	6432.47	5374.35	135.746	271.404	1327.54	1045.45	0.163596	-0.339958	-0.259283	0.382002	0.080437	0.167185
CG10413	chr2L	4757.29	4856.7	5026.33	5625.03	4971.53	5178.26	5751.4	5844.93	5652.18	5384.62	5760.69	4999.79	4880.11	5258.27	5749.51	5381.7	136.036	334.016	96.385	380.455	-0.236525	-0.128849	-0.0953761	0.00340234	0.201838	0.324456
CG10417	chr2R	7384.71	6646.76	7925.76	8395.42	7961.22	7731.19	7961.2	8771.43	7207.78	8566.27	10232.2	8129.17	7319.08	8029.28	7980.14	8975.86	642.021	337.304	781.999	1109.71	-0.124752	0.00885639	0.169637	0.346619	0.972487	0.210985
CG10418	chr3L	1491.49	1742.37	1305.07	990.645	1162.21	1011.52	1271.23	1155.44	1469.17	1327.16	1254.66	1354.51	1512.97	1054.79	1298.61	1312.11	219.442	93.6133	158.65	51.5971	0.220417	-0.300011	0.0149158	0.126532	0.0603193	0.948024
CG10425	chr3R	1251.37	1358.44	1414.36	1245.5	1347.45	1261.89	1171.43	1323.25	1324.51	1367.84	1361.22	1344.95	1341.39	1284.95	1273.06	1358	82.82	54.7466	88.0193	11.7756	0.075428	0.0134068	0.0931843	0.477517	0.945866	0.404634
CG10428	chr2L	1584.99	1639.83	1682.23	1705.1	1618.34	1534.37	1494.58	1509.25	1383.69	1656.45	1870.95	1580.61	1635.68	1619.27	1462.51	1702.67	48.7493	85.3686	68.6495	150.586	0.161451	0.146901	0.219357	0.105047	0.215695	0.0280306
CG10431	chr2L	296.681	241.643	326.802	427.609	417.282	433.365	469.284	513.529	454.655	439.827	482.857	424.611	288.375	426.085	479.156	449.098	43.1832	8.14915	30.6533	30.2096	-0.732547	-0.169353	-0.0934638	2.87446e-08	0.349662	0.60036
CG10433	chr2R	397.114	372.002	280.729	202.608	212.127	186.015	411.069	476.126	432.11	338.506	233.269	260.074	349.948	200.25	439.768	277.283	61.247	13.2144	33.1977	54.6882	-0.329601	-1.13494	-0.665385	0.0853859	4.71263e-10	0.00030905
CG10435	chr3R	1710.82	1764.63	1737.95	1624.06	1785.65	1689.22	1697.74	1957.07	1842.1	1865.24	1975.59	1745.15	1737.8	1699.64	1832.3	1861.99	26.9013	81.2963	129.943	115.252	-0.0763979	-0.108428	0.0231867	0.457217	0.361548	0.868193
CG10444	chr2R	4108.52	3939.41	4100.57	3844.21	3615.11	3859.06	3887.34	3768.57	3862.69	4071.28	3902.21	3625.11	4049.5	3772.8	3839.53	3866.2	95.4222	136.758	62.6762	225.252	0.0768127	-0.0252964	0.00998687	0.338973	0.840615	0.925654
CG10445	chr3R	667.245	569.132	711.465	1078.09	1018.8	1139.22	944.509	1035.14	866.098	685.455	734.365	747.315	649.28	1078.7	948.584	722.378	72.8471	60.2085	84.5966	32.6256	-0.546934	0.18545	-0.393021	2.01254e-06	0.207915	0.00102978
CG10459	chr2R	0	1.58975	0	0	0	0	0	0	0	0	0	0	0.529918	0	0	0	0.917845	0	0	0	#DIV/0!	#DIV/0!	#DIV/0!	NA	NA	NA
CG10462	chr2L	1738.53	1369.57	1755.09	2616.84	2494.73	2395.07	2004.26	2562.59	2325.88	2103.19	2447.88	2216.47	1621.06	2502.21	2297.58	2255.85	217.955	111.073	280.239	175.69	-0.503171	0.123092	-0.0264435	7.09737e-05	0.508378	0.894494
CG10463	chr2L	798.847	662.132	773.611	701.662	670.24	746.072	618.98	626.748	670.71	703.109	770.843	780.222	744.863	705.991	638.812	751.392	72.7496	38.1006	27.8955	42.0759	0.221583	0.144258	0.234173	0.0647848	0.339645	0.0567308
CG10465	chr2R	6050.22	6242.17	5788.15	6174.2	5185.65	4381.91	7489.54	6392.83	5398.56	6051.65	6761.92	5753.48	6026.85	5247.25	6426.97	6189.02	227.909	897.73	1045.91	518.064	-0.0927358	-0.292577	-0.0544294	0.603459	0.096325	0.803593
CG10466	chr2L	458.298	534.157	446.808	318.84	355.536	266.454	496.61	406.375	439.625	455.946	456.938	518.025	479.755	313.61	447.536	476.97	47.4631	44.7707	45.6346	35.5583	0.100291	-0.513033	0.091893	0.551556	0.00169318	0.64298
CG10467	chr3L	708.803	755.133	687.892	675.003	686.175	629.435	516.807	570.138	564.561	660.892	620.13	615.686	717.276	663.538	550.502	632.236	34.4119	30.0573	29.3139	24.9161	0.381781	0.269431	0.199716	0.000114752	0.0192336	0.0724641
CG10469	chr3L	91.1978	80.2826	100.719	119.432	108.553	125.686	93.8568	90.9795	97.6944	66.0124	51.8375	65.8147	90.7333	117.89	94.1769	61.2215	10.2263	8.66986	3.36888	8.1274	-0.0537419	0.323999	-0.621334	0.833483	0.23316	0.00909898
CG10470	chr2L	2299.57	2229.63	2090.46	2128.45	1845.4	1642.97	2254.94	1831.72	1952.01	2051.76	2097.5	1993.55	2206.55	1872.27	2012.89	2047.6	106.446	243.853	218.079	52.1008	0.132527	-0.104479	0.0246672	0.310876	0.544577	0.890602
CG10472	chr3L	0	1.58975	1.07148	3.19907	3.9836	7.03841	2.37612	2.02177	3.75748	1.53517	0.959954	2.12305	0.887079	4.74036	2.71846	1.53939	0.810761	2.02846	0.917097	0.581561	-1.61565	0.802209	-0.820425	0.428662	0.554323	0.654839
CG10474	chr2R	0	0	0	0	0	1.00549	0	0	0	0	0	1.06153	0	0.335162	0	0.353842	0	0.580518	0	0.612873	#DIV/0!	#DIV/0!	#DIV/0!	NA	NA	NA
CG10477	chr3L	0	0	0	0	0	0	0	0	0	0	0	0	0	0	0	0	0	0	0	0	#DIV/0!	#DIV/0!	#DIV/0!	NA	NA	NA
CG10479	chr3L	45.0217	49.2824	35.3589	34.1234	45.8114	30.1646	33.2657	24.2612	25.363	26.0979	43.1979	28.6612	43.221	36.6998	27.63	32.6524	7.13423	8.13533	4.9117	9.22222	0.645499	0.409538	0.240954	0.0978349	0.436554	0.647977
CG10481	chr2L	0	0	0	0	0	0	0	0	0	0	0	0	0	0	0	0	0	0	0	0	#DIV/0!	#DIV/0!	#DIV/0!	NA	NA	NA
CG10483	chr3L	3.46321	4.76926	3.21445	5.33178	8.96309	5.02744	14.2567	14.1524	10.3331	5.37311	3.83982	2.12305	3.81564	6.44077	12.9141	3.77866	0.835174	2.18969	2.23581	1.62589	-1.75895	-1.00364	-1.773	0.0198466	0.215758	0.0240274
CG10486	chr3L	0	0	0	0	0	0	0	0	0	0	0	0	0	0	0	0	0	0	0	0	#DIV/0!	#DIV/0!	#DIV/0!	NA	NA	NA
CG10492	chr2L	3451.66	2494.32	3426.6	4448.84	4817.16	5640.78	4672.64	6581.86	5629.64	4358.36	4366.83	3987.1	3124.2	4968.93	5628.05	4237.43	545.63	610.294	954.609	216.836	-0.849149	-0.1797	-0.409446	2.97564e-08	0.413114	0.0145159
CG10494	chr2R	731.891	623.978	766.11	854.151	883.363	934.098	799.565	883.512	775.919	868.908	882.198	857.714	707.327	890.537	819.665	869.607	74.1818	40.4533	56.5427	12.2571	-0.212658	0.119641	0.0853278	0.0591438	0.425146	0.539682
CG10495	chr2L	880.809	919.673	887.188	908.535	904.276	857.681	875.601	715.705	755.253	857.394	913.876	856.652	895.89	890.164	782.186	875.974	20.8418	28.212	83.281	32.8263	0.195809	0.186559	0.163376	0.0597778	0.124607	0.148213
CG10505	chr2R	19.6248	11.1283	25.7156	4.26542	8.96309	15.0823	16.6329	7.07618	11.2724	17.6545	4.79977	11.6768	18.8229	9.43694	11.6605	11.377	7.32665	5.42399	4.79014	6.4326	0.690861	-0.305237	-0.0355058	0.351952	0.829173	0.993631
CG10508	chr3L	1.1544	1.58975	2.14297	3.19907	1.9918	0	3.56418	3.03265	0.939369	1.53517	1.91991	2.12305	1.62904	1.73029	2.51207	1.85938	0.495451	1.61549	1.38768	0.298578	-0.624853	-0.537863	-0.434055	0.73047	NA	0.835119
CG10510	chr3L	0	0	0	0	0	0	0	0	0	0	0	0	0	0	0	0	0	0	0	0	#DIV/0!	#DIV/0!	#DIV/0!	NA	NA	NA
CG10512	chr3L	190.476	189.181	189.653	240.996	176.274	297.624	210.287	176.905	174.723	225.67	227.509	294.043	189.77	238.298	187.305	249.074	0.65579	60.72	19.933	38.9549	0.0188639	0.347381	0.411189	0.942172	0.183677	0.0752048
CG10513	chr3R	3.46321	21.4617	17.1437	13.8626	60.7499	15.0823	17.8209	48.5224	130.572	24.5628	22.0789	41.3996	14.0229	29.8983	65.6385	29.3471	9.39633	26.7252	58.2919	10.5114	-2.22676	-1.13448	-1.16133	0.0344608	0.297994	0.233481
CG10514	chr3R	70.4186	73.9235	114.649	70.3795	131.459	49.2689	146.132	190.046	248.933	13.8166	23.0389	29.7228	86.3303	83.7024	195.037	22.1927	24.587	42.6839	51.5821	7.98679	-1.17581	-1.22041	-3.13559	0.0012234	0.00196087	7.14174e-16
CG10516	chr3L	578.356	713.799	560.386	463.865	416.286	385.102	422.95	403.342	420.837	535.775	595.172	538.194	617.514	421.751	415.71	556.38	83.8687	39.665	10.7625	33.616	0.570894	0.0208136	0.420495	1.15091e-05	0.940216	0.00225696
CG10527	chr2R	4552.96	5429.01	4519.52	4056.42	3637.02	3646.9	5438.94	4735.99	5280.19	3945.4	3771.66	4266.28	4833.83	3780.11	5151.71	3994.44	515.712	239.337	368.671	250.93	-0.0918845	-0.446621	-0.367056	0.45696	3.82331e-05	0.000541681
CG10543	chr2R	1885.14	1307.57	1804.38	2131.65	2306.5	2679.62	2105.24	2879	2463.97	1797.69	1659.76	1691.01	1665.7	2372.59	2482.74	1716.15	312.762	279.903	387.217	72.3188	-0.575805	-0.0654673	-0.532752	0.000274427	0.811339	0.00107621
CG10550	chr3R	12.6984	8.74365	21.4297	11.7299	12.9467	15.0823	19.009	23.2503	30.0598	17.6545	11.5195	11.6768	14.2906	13.253	24.1064	13.6169	6.49114	1.69705	5.57493	3.49753	-0.75435	-0.863099	-0.824015	0.149826	0.168763	0.154433
CG10553	chr3R	4.61761	14.3078	16.0722	3.19907	25.8934	3.01646	14.2567	22.2394	37.5748	9.21104	3.83982	13.7999	11.6659	10.703	24.6903	8.95024	6.16741	13.1556	11.8506	4.98514	-1.08165	-1.20593	-1.46395	0.196796	0.223238	0.106226
CG10555	chrX	2486.58	2379.86	2514.77	2961.27	3124.14	3014.45	2616.11	3308.62	3005.04	2452.44	2268.37	2417.1	2460.41	3033.29	2976.59	2379.3	71.1626	83.0503	347.131	97.6805	-0.274765	0.0272202	-0.323122	0.00438693	0.881746	0.000884941
CG10559	chr3R	27.7057	19.077	21.4297	13.8626	6.97129	10.0549	27.3254	24.2612	24.4236	10.7462	10.5595	13.7999	22.7375	10.2963	25.3367	11.7019	4.46049	3.452	1.72415	1.81932	-0.15616	-1.29911	-1.11449	0.762949	0.019598	0.0275358
CG10560	chr3R	0	3.97438	5.35742	3.19907	9.95899	11.0604	7.12837	20.2177	30.9992	4.60552	4.79977	7.43069	3.1106	8.07281	19.4484	5.61199	2.7812	4.25655	11.954	1.57803	-2.64439	-1.26851	-1.79307	0.00223115	0.120357	0.0209456
CG10561	chr2L	495.239	500.772	450.023	425.476	453.134	469.563	556.013	532.735	436.807	526.564	496.296	494.672	482.011	449.391	508.518	505.844	27.8406	22.2804	63.1852	17.9627	-0.0772326	-0.178329	-0.00760678	0.631276	0.285867	0.986668
CG10562	chr3R	8.08082	8.74365	5.35742	2.13271	2.9877	0	5.94031	4.04353	5.63622	1.53517	0	2.12305	7.39396	1.7068	5.20668	1.21941	1.79457	1.53871	1.01873	1.09618	0.505982	-1.60907	-2.09418	0.552369	0.318297	0.171174
CG10565	chr3L	6846.76	6290.66	7106.08	7139.25	7117.69	8020.77	6251.58	7021.59	7160.81	6852.25	7299.49	6602.7	6747.83	7425.91	6811.33	6918.15	416.615	515.282	489.73	353.041	-0.0135124	0.124631	0.0224491	0.912796	0.30583	0.877154
CG10570	chr2L	0	0	0	0	0	0	0	0	0	0	0	0	0	0	0	0	0	0	0	0	#DIV/0!	#DIV/0!	#DIV/0!	NA	NA	NA
CG10576	chr3L	28636.1	29500.3	27833.9	24596.6	23299.1	24755.1	22336.7	20989	22441.5	25212.1	25872.7	26895.9	28656.8	24216.9	21922.4	25993.6	833.366	798.82	810.083	848.365	0.386469	0.143608	0.245749	7.52723e-11	0.0474791	7.52001e-05
CG10581	chr3L	8.08082	2.38463	11.7863	7.46449	9.95899	13.0713	8.31643	9.09795	5.63622	6.90828	3.83982	4.24611	7.41725	10.1649	7.68353	4.99807	4.73584	2.80909	1.81558	1.66672	-0.0508843	0.40376	-0.620399	0.937941	0.716584	0.598036
CG10584	chr3L	643.002	641.466	645.033	696.33	839.543	724.956	622.544	700.542	706.406	704.644	670.048	584.901	643.167	753.61	676.497	653.198	1.7893	75.7841	46.8167	61.6243	-0.072891	0.155734	-0.0505638	0.607025	0.32698	0.773932
CG10587	chr3L	0	0	0	0	0	0	0	0	0	0	0	0	0	0	0	0	0	0	0	0	#DIV/0!	#DIV/0!	#DIV/0!	NA	NA	NA
CG10588	chr3L	0	0.794877	0	0	0	0	0	0	0	0	0	0	0.264959	0	0	0	0.458922	0	0	0	#DIV/0!	#DIV/0!	#DIV/0!	NA	NA	NA
CG10589	chr3L	0	0	1.07148	0	0	0	0	0	0	0	0.959954	0	0.357161	0	0	0.319985	0.618621	0	0	0.55423	#DIV/0!	#DIV/0!	#DIV/0!	NA	NA	NA
CG10591	chr3L	0	0	0	0	0	0	1.18806	1.01088	0	0	0	0	0	0	0.732981	0	0	0	0.640932	0	#NUM!	#NUM!	#NUM!	NA	NA	NA
CG10597	chrX	0	0	0	0	0	0	0	0	0	0	0	0	0	0	0	0	0	0	0	0	#DIV/0!	#DIV/0!	#DIV/0!	NA	NA	NA
CG10598	chrX	0	0	0	0	0	2.01097	0	0	0	0	0	0	0	0.670325	0	0	0	1.16104	0	0	#DIV/0!	#DIV/0!	#DIV/0!	NA	NA	NA
CG10600	chr2L	1993.65	1513.45	2065.82	2453.68	2854.25	2672.59	2681.45	3282.34	2548.51	2419.43	2682.11	2306.7	1857.64	2660.17	2837.43	2469.41	300.257	200.569	390.99	192.633	-0.611116	-0.0930669	-0.200418	1.30727e-05	0.681114	0.23177
CG10602	chr2L	9070.14	9776.19	9174.04	8621.49	8054.83	8055.96	6101.88	7061.02	7435.11	9404.47	9626.42	9788.34	9340.12	8244.09	6866	9606.41	381.202	326.832	687.674	192.715	0.443971	0.263891	0.484527	1.26387e-07	0.00582044	6.87229e-09
CG10616	chr3L	1877.06	1908.5	1975.81	1994.09	2155.13	2213.08	1797.54	1849.92	1913.5	1902.08	1976.55	1866.16	1920.46	2120.76	1853.65	1914.93	50.4525	113.468	58.0693	56.3016	0.0510817	0.194215	0.0469232	0.578921	0.022845	0.648406
CG10621	chr2L	287.446	321.925	227.154	136.494	121.5	167.916	205.535	113.219	130.572	185.756	107.515	141.183	278.842	141.97	149.775	144.818	47.9677	23.688	49.0623	39.247	0.896648	-0.0772147	-0.0485589	0.000864974	0.892531	0.931875
CG10623	chr2L	3201.16	3877.41	3110.52	2896.22	3025.54	2720.85	2494.93	2208.78	2449.88	3240.75	2380.69	3245.09	3396.36	2880.87	2384.53	2955.51	419.058	152.926	153.86	497.815	0.510286	0.272801	0.309703	0.000180606	0.10087	0.038073
CG10628	chr2L	1049.35	1125.55	1097.2	989.578	993.907	1026.6	867.285	899.686	1016.4	1321.78	1350.66	1189.97	1090.7	1003.36	927.789	1287.47	38.5105	20.2423	78.4284	85.6616	0.233383	0.112974	0.47267	0.0202182	0.411811	5.33178e-07
CG10631	chr2L	1152.09	783.749	1258.99	1548.35	1692.03	2249.27	1586.06	1913.6	1708.71	1441.53	1296.9	1411.83	1064.94	1829.89	1736.13	1383.42	249.32	370.239	165.482	76.3861	-0.705092	0.0758822	-0.327633	0.000102447	0.809947	0.112046
CG10638	chr3L	3369.7	3615.89	3159.8	2870.63	2994.67	2729.9	2771.75	2875.96	2995.65	3015.85	2909.62	3124.07	3381.8	2865.07	2881.12	3016.51	228.286	132.473	112.04	107.228	0.231162	-0.00806128	0.066253	0.00474815	0.960883	0.530575
CG10646	chr3L	734.2	839.39	697.535	705.928	728.002	697.808	661.75	721.771	768.404	705.412	698.847	676.193	757.042	710.579	717.308	693.484	73.6341	15.6253	53.4668	15.3302	0.0777798	-0.0135975	-0.048731	0.537006	0.942566	0.745616
CG10650	chr2L	10.3896	6.35901	15.0008	9.5972	15.9344	15.0823	9.50449	15.1632	8.45432	15.3517	12.4794	12.7383	10.5831	13.538	11.0407	13.5232	4.32412	3.43929	3.60865	1.58888	-0.0610631	0.294181	0.292602	0.919918	0.760702	0.719596
CG10651	chr2L	0	1.58975	0	0	3.9836	2.01097	1.18806	1.01088	0	0.767587	1.91991	1.06153	0.529918	1.99819	0.732981	1.24967	0.917845	1.99183	0.640932	0.598758	-0.468008	1.44685	0.769703	NA	NA	0.825392
CG10654	chr3L	577.201	550.85	585.03	363.627	521.851	483.639	344.538	436.702	413.322	898.076	985.873	786.591	571.027	456.373	398.187	890.18	17.907	82.5609	47.9098	99.8752	0.520112	0.196765	1.16065	0.00119322	0.371592	4.06478e-15
CG10657	chr3L	4.61761	3.17951	1.07148	2.13271	1.9918	2.01097	5.94031	8.08707	5.63622	3.07035	0.959954	3.18458	2.9562	2.04516	6.55453	2.40496	1.78358	0.0764245	1.3359	1.25271	-1.14875	-1.68028	-1.44648	0.234232	0.168946	0.179245
CG10660	chr3L	150.072	128.77	154.294	187.679	120.504	189.032	144.943	117.262	138.087	122.814	96.9554	157.106	144.379	165.738	133.431	125.625	13.6812	39.1798	14.416	30.1737	0.113763	0.31281	-0.0869702	0.719645	0.336128	0.809449
CG10663	chr3L	11.544	19.8719	22.5011	29.858	20.9139	19.1043	40.3941	37.4027	30.9992	26.0979	16.3192	18.046	17.9724	23.292	36.2653	20.1544	5.72021	5.7578	4.79961	5.21919	-1.01281	-0.638754	-0.847497	0.0232036	0.220148	0.0700855
CG10669	chr3R	488.312	458.644	448.951	474.528	527.827	580.166	516.807	482.191	427.413	424.475	455.018	412.934	465.303	527.507	475.47	430.809	20.5079	52.8196	45.0742	21.7454	-0.0311862	0.149835	-0.142306	0.862044	0.365873	0.363881
CG10672	chr3L	1404.91	1583.39	1338.28	1525.96	1362.39	1325.23	1404.29	1242.38	1446.63	1360.16	1251.78	1451.11	1442.19	1404.53	1364.43	1354.35	126.739	106.79	107.802	99.7905	0.079967	0.0417839	-0.0106982	0.541511	0.833142	0.952188
CG10674	chr3L	1373.74	1364.01	1325.42	1292.42	1135.33	1108.05	1134.6	1050.31	1053.03	1214.32	1212.42	1147.51	1354.39	1178.6	1079.31	1191.42	25.5529	99.5143	47.898	38.037	0.327531	0.126959	0.142567	0.000229131	0.283578	0.164145
CG10680	chr2L	42.7129	59.6158	43.9308	18.128	63.7375	61.3347	49.8986	40.4353	40.3929	18.4221	12.4794	15.9229	48.7532	47.7334	43.5756	15.6081	9.42698	25.6672	5.4759	2.98381	0.161975	0.13148	-1.48122	0.749129	0.856498	0.00456387
CG10681	chr3L	419.048	525.414	421.093	404.149	410.31	376.052	459.78	391.212	426.474	386.864	398.381	322.704	455.185	396.837	425.822	369.316	60.8285	18.262	34.2886	40.776	0.096203	-0.101702	-0.205393	0.552226	0.655032	0.234361
CG10694	chr3R	0	0	0	0	0	0	0	0	0	0	0.959954	1.06153	0	0	0	0.673827	0	0	0	0.585757	#DIV/0!	#DIV/0!	#DIV/0!	NA	NA	NA
CG10700	chr2L	0	0	0	0	0	0	0	0	0	0	0	0	0	0	0	0	0	0	0	0	#DIV/0!	#DIV/0!	#DIV/0!	NA	NA	NA
CG10702	chr2L	1133.62	963.391	1042.55	1114.34	1372.35	1386.57	1098.96	1545.64	1378.05	1344.81	1339.14	1004.2	1046.52	1291.09	1340.88	1229.38	85.1857	153.23	225.65	195.032	-0.357581	-0.0545993	-0.125249	0.0336337	0.849886	0.553434
CG10710	chr3L	4.61761	2.38463	7.50038	0	5.9754	1.00549	3.56418	3.03265	9.39369	3.07035	4.79977	2.12305	4.83421	2.32696	5.33018	3.33106	2.56474	3.19938	3.52913	1.35727	-0.140904	-1.19574	-0.678203	0.892325	0.494868	0.63514
CG10713	chr3L	0	0	0	0	0	0	0	0	0	0	0	0	0	0	0	0	0	0	0	0	#DIV/0!	#DIV/0!	#DIV/0!	NA	NA	NA
CG10725	chr3L	0	0	1.07148	0	0	0	0	0	0	0	0	0	0.357161	0	0	0	0.618621	0	0	0	#DIV/0!	#DIV/0!	#DIV/0!	NA	NA	NA
CG10730	chr2L	3.46321	1.58975	7.50038	3.19907	0	2.01097	1.18806	3.03265	5.63622	2.30276	2.87986	0	4.18445	1.73668	3.28564	1.72754	3.0206	1.61708	2.23484	1.52367	0.348862	-0.919843	-0.927456	0.83151	0.684305	0.637601
CG10731	chr2R	352.093	452.285	309.659	347.632	353.544	239.306	496.61	410.419	495.987	478.206	474.217	411.872	371.345	313.494	467.672	454.765	73.2364	64.3167	49.5836	37.1999	-0.332734	-0.577058	-0.0403736	0.107655	0.00649343	0.898718
CG10734	chr2R	1.1544	3.17951	0	0	2.9877	2.01097	1.18806	1.01088	0.939369	0.767587	0	0	1.44464	1.66622	1.0461	0.255862	1.6095	1.52339	0.128033	0.443166	0.46568	0.671555	-2.03159	NA	NA	0.705063
CG10737	chr2R	1146.32	1115.21	1176.49	1218.84	1177.15	1318.19	1789.22	1918.66	1961.4	1366.3	1306.5	1339.65	1146.01	1238.06	1889.76	1337.48	30.6393	72.458	89.6548	29.9618	-0.721586	-0.610117	-0.498682	2.93046e-21	5.12889e-15	1.10295e-10
CG10738	chr3L	548.341	435.593	556.1	949.057	1011.83	892.873	762.735	882.501	849.19	1112.23	1140.43	1028.62	513.344	951.254	831.475	1093.76	67.4468	59.5109	61.8167	58.1473	-0.695746	0.194158	0.39555	3.98352e-09	0.206665	0.00124754
CG1074	chr3R	1825.11	1831.4	1829.02	1881.05	1944.99	1931.54	2316.72	2288.64	2081.64	1971.93	2095.58	1881.03	1828.51	1919.19	2229	1982.85	3.17406	33.7103	128.386	107.693	-0.285729	-0.215896	-0.168825	0.000214809	0.013582	0.046153
CG10747	chr2L	510.246	577.081	590.387	567.301	550.732	540.952	569.081	576.203	529.804	596.415	544.294	642.224	559.238	552.995	558.363	594.311	42.9468	13.3196	24.9877	48.9987	0.00225876	-0.0139363	0.0900144	0.974286	0.952966	0.528823
CG10748	chr3L	0	0	0	0	0	0	0	0	0	0	0	0	0	0	0	0	0	0	0	0	#DIV/0!	#DIV/0!	#DIV/0!	NA	NA	NA
CG10749	chr3L	0	0	0	0	0	0	0	0	0	0	0	0	0	0	0	0	0	0	0	0	#DIV/0!	#DIV/0!	#DIV/0!	NA	NA	NA
CG10750	chr2L	0	0	0	0	0	0	0	1.01088	0	0	0	0	0	0	0.336961	0	0	0	0.583634	0	#NUM!	#NUM!	#NUM!	NA	NA	NA
CG10752	chr3L	0	0	0	0	0	0	0	0	0	0	0.959954	0	0	0	0	0.319985	0	0	0	0.55423	#DIV/0!	#DIV/0!	#DIV/0!	NA	NA	NA
CG10761	chrX	0	0	0	0	1.9918	0	1.18806	1.01088	0	0	0	0	0	0.663933	0.732981	0	0	1.14997	0.640932	0	#NUM!	-0.14274	#NUM!	NA	NA	NA
CG10764	chr2R	12.6984	11.9232	12.8578	5.33178	10.9549	11.0604	20.197	14.1524	15.9693	10.7462	7.67963	11.6768	12.4931	9.11568	16.7729	10.0342	0.500002	3.27738	3.10143	2.09154	-0.424997	-0.87971	-0.741204	0.498529	0.227124	0.255913
CG1077	chr3R	5401.45	5084.83	4879.53	5591.97	5098.01	4723.78	4317.41	3594.7	3751.84	4783.6	3330.08	4565.63	5121.94	5137.92	3887.99	4226.44	262.929	435.469	380.106	783.879	0.397667	0.402161	0.120419	0.00498024	0.00977919	0.500737
CG10778	chrX	1620.78	1755.09	1538.65	1293.49	1271.76	1237.75	1670.41	1411.19	1584.72	1317.18	1452.41	1546.64	1638.17	1267.67	1555.44	1438.74	109.262	28.0921	132.067	115.342	0.074764	-0.295145	-0.112513	0.53117	0.0102495	0.36618
CG10793	chrX	2.30881	1.58975	2.14297	0	1.9918	1.00549	4.75224	0	3.75748	1.53517	0.959954	0	2.01384	0.999095	2.83657	0.831709	0.376515	0.995915	2.50639	0.77558	-0.494199	-1.50546	-1.77	0.753934	NA	0.410136
CG10795	chr2R	901.588	761.492	954.691	911.734	1032.75	946.164	658.186	909.795	781.555	1061.57	1109.71	853.468	872.591	963.548	783.179	1008.25	99.8106	62.3516	125.812	136.188	0.155963	0.299016	0.364439	0.387441	0.107991	0.0265394
CG10799	chr2R	13.8528	27.8207	9.64335	1.06636	8.96309	8.0439	16.6329	5.05442	5.63622	1.53517	2.87986	2.12305	17.1056	6.02445	9.10783	2.17936	9.51522	4.31836	6.52335	0.674111	0.909291	-0.596278	-2.0632	0.197464	0.696513	0.143892
CG10801	chrX	0	0	1.07148	2.13271	0	0	1.18806	0	1.87874	0.767587	0	1.06153	0.357161	0.710904	1.02227	0.609705	0.618621	1.23132	0.950279	0.548092	-1.51712	-0.524045	-0.745589	NA	NA	NA
CG10802	chrX	1853.97	2008.65	1670.44	1618.73	1592.44	1471.03	1891.39	1646.73	1863.71	1763.91	1830.63	1877.84	1844.36	1560.73	1800.61	1824.13	169.311	78.7908	133.982	57.2414	0.0346308	-0.206262	0.0187221	0.778294	0.0832062	0.908328
CG10803	chrX	2714	2888.58	2980.87	3526.44	3527.47	3627.8	3318.26	3848.43	3748.08	2977.47	3046.89	2911.77	2861.15	3560.57	3638.26	2978.71	135.531	58.2229	281.635	67.5718	-0.346652	-0.031139	-0.288559	8.90643e-06	0.818287	0.000319085
CG10804	chrX	0	0	1.07148	1.06636	0	0	1.18806	0	0	1.53517	0	0	0.357161	0.355452	0.39602	0.511724	0.618621	0.615661	0.685927	0.886333	-0.149	-0.15592	0.369792	NA	NA	NA
CG10809	chr3L	1134.78	989.622	1165.77	1079.15	1157.23	1177.43	958.765	1324.26	1194.88	1076.92	1049.23	1011.64	1096.72	1137.94	1159.3	1045.93	94.0395	51.9009	185.325	32.7693	-0.0800531	-0.0268327	-0.148468	0.591629	0.909476	0.332522
CG10814	chr2R	4.61761	4.76926	1.07148	1.06636	0	1.00549	0	0	0	0	0	0	3.48612	0.690614	0	0	2.09251	0.598863	0	0	#DIV/0!	#DIV/0!	#DIV/0!	NA	NA	1
CG10822	chr2R	0	0	0	0	0	0	0	0	0	0	0	0	0	0	0	0	0	0	0	0	#DIV/0!	#DIV/0!	#DIV/0!	NA	NA	NA
CG10834	chr2L	0	4.76926	5.35742	0	0.995899	0	0	0	0	1.53517	0	0	3.37556	0.331966	0	0.511724	2.93807	0.574983	0	0.886333	#DIV/0!	#DIV/0!	#DIV/0!	NA	NA	0.855673
CG10839	chr2L	0	0	0	0	0	0	0	0	0	0	0	0	0	0	0	0	0	0	0	0	#DIV/0!	#DIV/0!	#DIV/0!	NA	NA	NA
CG10841	chr3R	2.30881	0	0	2.13271	0.995899	1.00549	0	0	0	0.767587	0.959954	0	0.769602	1.37803	0	0.575847	1.33299	0.653589	0	0.507889	#DIV/0!	#DIV/0!	#DIV/0!	NA	NA	NA
CG10845	chr3R	0	0	0	0	0	0	0	0	0	0	0	0	0	0	0	0	0	0	0	0	#DIV/0!	#DIV/0!	#DIV/0!	NA	NA	NA
CG10853	chr3L	0	0	0	0	0	1.00549	0	0	0.939369	0	0	0	0	0.335162	0.313123	0	0	0.580518	0.542345	0	#NUM!	0.0981305	#NUM!	NA	NA	NA
CG10859	chr2L	1.1544	1.58975	1.07148	0	0.995899	1.00549	0	2.02177	0	1.53517	1.91991	1.06153	1.27188	0.667129	0.673922	1.50554	0.278391	0.57777	1.16727	0.429958	0.916308	-0.0146166	1.15962	NA	NA	0.659968
CG10862	chr3L	0	1.58975	0	0	0	0	0	3.03265	0	0	0	0	0.529918	0	1.01088	0	0.917845	0	1.7509	0	-0.931776	#NUM!	#NUM!	NA	NA	NA
CG10863	chr3L	3924.97	4196.95	3659.11	3153.21	3276.51	3110.98	2857.29	2895.17	3205.13	3702.84	3701.58	3614.5	3927.01	3180.23	2985.86	3672.97	268.923	86.0095	190.833	50.6441	0.395284	0.0909854	0.298801	4.72483e-07	0.423716	0.000245382
CG10864	chr3R	8.08082	11.1283	7.50038	7.46449	12.9467	10.0549	16.6329	14.1524	9.39369	9.97863	7.67963	12.7383	8.90316	10.1554	13.393	10.1322	1.94874	2.74248	3.67884	2.53284	-0.589087	-0.399236	-0.402529	0.42499	0.681213	0.613164
CG10866	chr3L	1545.75	1637.45	1473.29	1361.74	1375.34	1226.69	1475.57	1486	1311.36	1519.05	1651.12	1412.89	1552.16	1321.26	1424.31	1527.69	82.2663	82.1745	97.9568	119.349	0.124014	-0.108353	0.101088	0.2635	0.449651	0.413229
CG10869	chr2L	4.61761	3.17951	3.21445	3.19907	1.9918	1.00549	0	0	1.87874	0	0.959954	3.18458	3.67052	2.06545	0.626246	1.38151	0.820388	1.09864	1.08469	1.63361	2.55118	1.72166	1.14145	0.178429	NA	0.821812
CG10874	chr2L	1747.77	1502.32	1625.44	1550.48	1605.39	1445.89	1687.05	1818.58	1582.84	1707.88	1716.4	1513.74	1625.17	1533.92	1696.15	1646.01	122.724	81.0288	118.134	114.626	-0.0616731	-0.145044	-0.0432985	0.608601	0.270986	0.773407
CG10877	chr3R	238.961	256.745	249.656	244.195	226.069	232.268	215.039	236.547	261.145	412.194	473.257	420.365	248.454	234.177	237.577	435.272	8.95262	9.21287	23.07	33.149	0.064585	-0.0207922	0.873523	0.726396	0.929398	9.90748e-12
CG10880	chr2L	1817.03	2026.14	1659.73	1658.18	1688.05	1418.74	1480.32	1379.86	1485.14	1842.21	1895.91	1732.41	1834.3	1588.33	1448.44	1823.51	183.816	147.62	59.4455	83.3372	0.340728	0.133005	0.332217	0.00149382	0.361976	0.00258266
CG10887	chr3R	1.1544	0	2.14297	0	0.995899	0	0	0	0.939369	0	0	0	1.09912	0.331966	0.313123	0	1.07255	0.574983	0.542345	0	1.81155	0.0843073	#NUM!	NA	NA	NA
CG10889	chr3R	614.142	624.773	673.963	704.861	718.043	804.39	696.204	722.782	648.165	677.779	715.166	680.439	637.626	742.431	689.05	691.128	31.9144	54.0608	37.8193	20.86	-0.111898	0.107649	0.00434391	0.339662	0.448644	0.978796
CG10898	chr3R	668.399	618.414	710.393	701.662	681.195	708.869	601.159	756.141	660.377	823.62	862.999	738.823	665.736	697.242	672.559	808.481	46.0474	14.3565	78.2057	63.4574	-0.0147111	0.051999	0.265553	0.913615	0.805411	0.0376999
CG1090	chr3R	12.6984	7.15389	21.4297	5.33178	2.9877	10.0549	11.8806	6.0653	9.39369	4.60552	3.83982	5.30763	13.7607	6.12478	9.1132	4.58432	7.19692	3.59971	2.91779	0.734138	0.59452	-0.573299	-0.991249	0.433058	0.648674	0.341695
CG10903	chr3R	1068.98	1025.39	1118.63	1080.22	981.957	982.361	835.207	873.403	811.615	1074.62	1132.75	1112.48	1071	1014.85	840.075	1106.62	46.6515	56.6151	31.1804	29.5028	0.350367	0.27267	0.397564	5.98849e-05	0.00514923	4.33888e-06
CG10904	chr2R	851.949	940.339	859.329	818.961	833.568	733	836.395	764.228	847.311	949.505	1040.59	874.698	883.873	795.176	815.978	954.931	49.0406	54.3392	45.1482	83.0791	0.115308	-0.0372553	0.226866	0.341356	0.848313	0.0528004
CG10907	chr3L	802.31	866.416	772.539	694.198	694.142	662.616	564.329	584.291	592.742	775.262	766.044	782.345	813.755	683.652	580.454	774.55	47.9733	18.2175	14.5898	8.17421	0.487413	0.23608	0.416178	4.80303e-08	0.0293491	5.26105e-06
CG10909	chr3R	0	0	0	0	0	0	0	0	0	0	0	0	0	0	0	0	0	0	0	0	#DIV/0!	#DIV/0!	#DIV/0!	NA	NA	NA
CG10910	chr2R	1.1544	0	2.14297	0	0	0	1.18806	1.01088	0	0	0	0	1.09912	0	0.732981	0	1.07255	0	0.640932	0	0.584504	#NUM!	#NUM!	NA	NA	NA
CG10911	chr2R	0	0	16.0722	0	0.995899	2.01097	0	0	0	0	0	1.06153	5.35742	1.00229	0	0.353842	9.27932	1.0055	0	0.612873	#DIV/0!	#DIV/0!	#DIV/0!	0.354367	NA	0.966855
CG10912	chr2R	0	0	1.07148	0	0	0	0	0	0	0	0	0	0.357161	0	0	0	0.618621	0	0	0	#DIV/0!	#DIV/0!	#DIV/0!	NA	NA	NA
CG10914	chr2R	675.325	592.978	683.606	704.861	599.531	741.044	481.165	417.495	465.927	671.638	626.85	729.269	650.637	681.812	454.862	675.919	50.1051	73.5181	33.2459	51.3435	0.516422	0.583945	0.571421	4.83393e-05	8.8422e-06	5.91697e-06
CG10915	chr2R	2174.89	1876.7	2298.33	2438.76	2407.09	2568.01	2366.62	2529.23	2416.06	2203.74	2024.54	2187.81	2116.64	2471.29	2437.3	2138.7	216.765	85.2524	83.3615	99.1805	-0.203507	0.0199772	-0.188553	0.03547	0.914356	0.0671813
CG10916	chr2R	349.784	399.028	336.446	281.518	299.766	328.794	401.565	388.179	442.443	325.457	262.068	283.428	361.753	303.359	410.729	290.317	32.9633	23.8422	28.2688	32.2513	-0.183183	-0.437159	-0.500556	0.248675	0.005196	0.000543474
CG10918	chrX	0	0	0	0	0	0	0	0	0	0	0	0	0	0	0	0	0	0	0	0	#DIV/0!	#DIV/0!	#DIV/0!	NA	NA	NA
CG10919	chr3R	0	0	0	0	0	0	0	0	1.87874	0	0	0	0	0	0.626246	0	0	0	1.08469	0	#NUM!	#NUM!	#NUM!	NA	NA	NA
CG1092	chr3R	5.77201	12.718	3.21445	5.33178	7.96719	5.02744	13.0687	12.1306	15.9693	0	2.87986	0	7.23483	6.1088	13.7228	0.959954	4.91776	1.61659	2.00121	1.66269	-0.923549	-1.16762	-3.83747	0.230413	0.180873	0.000944129
CG10920	chrX	0	0	0	0	0	2.01097	0	0	0	0	0	0	0	0.670325	0	0	0	1.16104	0	0	#DIV/0!	#DIV/0!	#DIV/0!	NA	NA	NA
CG10927	chr2R	283.983	259.925	237.869	250.594	214.118	248.355	143.755	191.057	194.449	247.93	275.507	229.29	260.592	237.689	176.421	250.909	23.0641	20.4435	28.3397	23.2521	0.562776	0.430057	0.508146	0.00111305	0.0322096	0.0043353
CG10931	chr2R	1.1544	0	0	3.19907	0.995899	0	4.75224	0	0.939369	0.767587	0.959954	1.06153	0.384801	1.39832	1.8972	0.929689	0.666495	1.63706	2.51675	0.149289	-2.30169	-0.440178	-1.02905	NA	NA	0.692053
CG10932	chrX	4273.6	4897.24	4098.42	3580.82	3428.88	3021.49	1828.43	1318.19	1431.6	3764.24	4069.25	4169.68	4423.09	3343.73	1526.07	4001.06	419.864	289.226	267.916	211.143	1.53523	1.13164	1.39056	2.554e-36	2.48478e-19	6.49297e-30
CG10934	chr2R	0	0	0	0	0	0	0	2.02177	0	0	0	0	0	0	0.673922	0	0	0	1.16727	0	#NUM!	#NUM!	#NUM!	NA	NA	NA
CG10936	chr2R	581.819	542.901	672.891	870.146	897.305	920.021	672.443	613.606	604.954	672.406	605.731	792.961	599.204	895.824	630.334	690.366	66.7162	24.9702	36.7227	94.8981	-0.0730704	0.507099	0.131244	0.648551	0.00017792	0.418437
CG10939	chr2R	3504.77	3667.56	3467.32	3675.73	3678.85	3430.72	3678.24	3963.67	3687.96	3610.73	3695.82	3210.06	3546.55	3595.1	3776.62	3505.54	106.459	142.364	162.062	259.405	-0.0906816	-0.0710652	-0.107462	0.324899	0.551457	0.265502
CG10943	chr3L	0	0	0	0	0	0	0	1.01088	0	0	0	0	0	0	0.336961	0	0	0	0.583634	0	#NUM!	#NUM!	#NUM!	NA	NA	NA
CG10947	chr2L	3.46321	2.38463	3.21445	1.06636	2.9877	1.00549	0	2.02177	3.75748	0.767587	2.87986	0	3.02076	1.68651	1.92641	1.21582	0.564773	1.12727	1.88055	1.49134	0.648995	-0.191874	-0.663993	0.703228	NA	0.782122
CG10948	chr3L	1087.45	997.57	1157.2	1169.79	1195.08	1048.72	1253.4	1482.97	1260.63	1314.88	1270.02	1324.79	1080.74	1137.86	1332.33	1303.23	80.0267	78.2274	130.5	29.1822	-0.301937	-0.227627	-0.0318681	0.00467339	0.0692802	0.843097
CG10949	chr2L	681.098	767.056	715.751	659.008	714.06	649.545	666.502	690.433	676.346	726.137	707.486	754.746	721.301	674.204	677.76	729.456	43.2473	34.8387	12.028	23.8039	0.0898268	-0.00759005	0.106046	0.405796	0.970795	0.369418
CG10950	chr2R	0	0	0	0	0.995899	0	0	1.01088	0	0	0	0	0	0.331966	0.336961	0	0	0.574983	0.583634	0	#NUM!	-0.0215447	#NUM!	NA	NA	NA
CG10953	chr2R	0	0	0	0	0	0	0	0	0	0	0	0	0	0	0	0	0	0	0	0	#DIV/0!	#DIV/0!	#DIV/0!	NA	NA	NA
CG10958	chrX	135.065	123.206	123.221	136.494	124.487	149.818	106.926	82.8924	105.209	165.031	116.154	126.322	127.164	136.933	98.3424	135.836	6.84268	12.6708	13.4076	25.7899	0.370803	0.477583	0.465977	0.111904	0.0601193	0.0418362
CG10959	chrX	953.537	994.391	1037.2	1071.69	1110.43	1105.03	1179.74	1131.18	1077.46	1142.17	1164.42	1101.86	995.041	1095.72	1129.46	1136.15	41.8334	20.9828	51.1658	31.7107	-0.182805	-0.0437601	0.00852382	0.0335549	0.752589	0.93897
CG10960	chr3L	9995.97	10461.4	11204.5	11678.7	11032.6	11421.3	12321.4	11278.4	10960.6	10116.8	9719.54	9666.26	10553.9	11377.5	11520.1	9834.2	609.559	325.297	711.88	246.179	-0.126373	-0.017967	-0.228277	0.116516	0.900112	0.00317826
CG10962	chrX	166.234	131.95	131.792	87.4412	74.6924	108.593	74.8479	100.077	90.1794	67.5476	80.6362	75.3684	143.325	90.2421	88.3682	74.5174	19.8396	17.1228	12.7119	6.58564	0.697693	0.0302723	-0.245951	0.00285395	0.959269	0.393
CG10969	chr3L	0	0	0	0	0	0	0	0	0	0	0.959954	0	0	0	0	0.319985	0	0	0	0.55423	#DIV/0!	#DIV/0!	#DIV/0!	NA	NA	NA
CG10970	chrX	0	0	0	0	0.995899	2.01097	2.37612	1.01088	2.81811	2.30276	0.959954	1.06153	0	1.00229	2.06837	1.44141	0	1.0055	0.942098	0.747674	#NUM!	-1.04519	-0.521011	NA	NA	0.810385
CG10973	chr3L	1115.15	1030.16	1099.34	1135.67	965.026	975.323	952.825	856.218	852.008	1059.27	1270.98	1006.33	1081.55	1025.34	887.017	1112.19	45.2028	95.6869	57.0303	140.038	0.286069	0.209068	0.326372	0.0211964	0.161293	0.00947448
CG10979	chr3R	2843.29	2288.45	3065.51	3720.52	3863.09	4195.9	3418.05	4412.51	3583.69	3796.48	3995.33	3452.09	2732.42	3926.5	3804.75	3747.97	400.221	243.952	532.807	274.853	-0.477623	0.0454429	-0.0216939	0.000376052	0.852085	0.921921
CG10984	chr3L	1348.34	1257.5	1437.93	1641.12	1828.47	1840.04	1400.72	1690.2	1415.63	1837.6	1921.83	1708	1347.92	1769.88	1502.18	1822.48	90.2183	111.656	162.995	107.715	-0.156323	0.236589	0.278839	0.185377	0.0641359	0.0143841
CG10993	chrX	0	0	0	0	0	0	0	0	0	0	0	0	0	0	0	0	0	0	0	0	#DIV/0!	#DIV/0!	#DIV/0!	NA	NA	NA
CG10996	chrX	0	0	0	0	0	0	0	0	0	0	0	0	0	0	0	0	0	0	0	0	#DIV/0!	#DIV/0!	#DIV/0!	NA	NA	NA
CG11000	chr3R	15.0072	15.1027	13.9293	44.7869	47.8032	34.1866	57.0269	72.7836	54.4834	19.1897	22.0789	13.7999	14.6797	42.2589	61.4313	18.3562	0.651653	7.15166	9.91327	4.20201	-2.06515	-0.539719	-1.74271	8.83969e-09	0.173167	5.55653e-07
CG11007	chr2R	3134.2	3514.95	2935.86	2668.02	2632.16	2453.39	3279.05	2672.78	2888.56	3173.2	3092.97	3106.03	3195	2584.52	2946.79	3124.07	294.29	114.973	307.303	43.05	0.116671	-0.189248	0.0842791	0.304692	0.131768	0.516323
CG11018	chr2R	0	0	0	0	0	0	0	1.01088	0	0	0	0	0	0	0.336961	0	0	0	0.583634	0	#NUM!	#NUM!	#NUM!	NA	NA	NA
CG11023	chr2L	5.77201	4.76926	4.28593	20.2608	27.8852	20.1097	9.50449	7.07618	12.2118	26.8655	25.9188	22.2921	4.9424	22.7519	9.59749	25.0255	0.758019	4.44619	2.56907	2.41405	-0.957445	1.24526	1.38267	0.248633	0.0340374	0.00725088
CG11029	chr2L	1.1544	0.794877	4.28593	6.39814	2.9877	3.01646	4.75224	2.02177	0.939369	5.37311	0.959954	3.18458	2.0784	4.1341	2.57113	3.17255	1.92021	1.96077	1.96491	2.2066	-0.306925	0.685172	0.303241	0.883954	0.697489	0.852237
CG1103	chr3R	3610.97	3664.38	3361.24	3585.09	3242.65	2994.34	3304	3238.87	3114.95	3278.36	3291.68	3172.9	3545.53	3274.03	3219.27	3247.65	161.818	296.621	96.0365	65.0735	0.139268	0.0243311	0.0126615	0.125611	0.877112	0.925654
CG11030	chr2L	2126.41	2100.86	2031.53	1878.92	1976.86	1851.1	1260.53	1434.44	1384.63	1954.28	1935.27	1940.47	2086.27	1902.29	1359.87	1943.34	49.0932	66.0571	89.5603	9.82276	0.617456	0.484272	0.515069	1.27017e-17	1.47768e-10	1.68216e-12
CG11034	chr2L	967.389	1088.98	1111.13	618.486	542.765	669.655	881.541	1005.83	1044.58	1231.98	1166.34	1348.14	1055.83	610.302	977.316	1248.82	77.3906	63.8394	85.1763	92.0604	0.111484	-0.679302	0.353668	0.420746	1.59908e-08	0.00400716
CG11035	chr3R	327.85	352.925	293.586	288.982	316.696	232.268	245.929	262.83	263.023	326.224	366.703	295.104	324.787	279.315	257.261	329.344	29.7878	43.0364	9.81418	35.9008	0.336265	0.118664	0.356364	0.0440463	0.639438	0.0397421
CG11037	chr3L	0	0	0	0	0	0	0	0	0	0	0	0	0	0	0	0	0	0	0	0	#DIV/0!	#DIV/0!	#DIV/0!	NA	NA	NA
CG11041	chr2R	0	0	0	0	0	0	0	0	0	0	0	0	0	0	0	0	0	0	0	0	#DIV/0!	#DIV/0!	#DIV/0!	NA	NA	NA
CG11044	chr2R	0	0.794877	1.07148	1.06636	0	0	0	2.02177	0.939369	0.767587	0	0	0.62212	0.355452	0.987045	0.255862	0.55624	0.615661	1.01173	0.443166	-0.665923	-1.47346	-1.94775	NA	NA	NA
CG1105	chr3R	924.676	1015.06	945.048	1113.28	1039.72	1031.63	1423.3	1328.3	1321.69	1133.73	1328.58	1254.72	961.594	1061.54	1357.76	1239.01	47.408	44.9853	56.8501	98.3718	-0.497732	-0.355072	-0.132046	7.95013e-08	0.000419653	0.228529
CG11050	chr2L	4121.22	4078.51	4070.56	3739.71	3971.65	4080.27	4317.41	4908.85	4327.67	4785.9	4530.02	4131.46	4090.1	3930.54	4517.98	4482.46	27.2413	173.96	338.542	329.802	-0.143542	-0.20095	-0.0113859	0.124012	0.047237	0.93897
CG11052	chr3R	3.46321	2.38463	2.14297	0	0	1.00549	1.18806	0	0.939369	0.767587	0.959954	0	2.6636	0.335162	0.709143	0.575847	0.702942	0.580518	0.626598	0.507889	1.90923	-1.08122	-0.300392	NA	NA	0.953153
CG11060	chr2R	0	0	0	0	0	0	0	1.01088	0	0	0	0	0	0	0.336961	0	0	0	0.583634	0	#NUM!	#NUM!	#NUM!	NA	NA	NA
CG11068	chrX	1.1544	0	0	0	0	0	0	2.02177	0	0	0	0	0.384801	0	0.673922	0	0.666495	0	1.16727	0	-0.80847	#NUM!	#NUM!	NA	NA	NA
CG11069	chr3R	434.055	490.439	386.805	458.533	431.224	414.261	350.478	287.091	275.235	335.435	240.949	367.288	437.1	434.673	304.268	314.557	51.8838	22.3367	40.4557	65.7066	0.52262	0.514587	0.0479805	0.00341747	0.00929335	0.858537
CG11070	chr2L	2001.73	1658.11	2136.54	2601.91	2573.4	3158.24	2434.34	2868.89	2661.23	2334.23	2401.81	2279.1	1932.13	2777.85	2654.82	2338.38	246.69	329.732	217.346	61.4587	-0.458423	0.0653547	-0.183105	0.00017687	0.747089	0.20204
CG11073	chr2R	0	0.794877	5.35742	7.46449	5.9754	3.01646	0	1.01088	0	1.53517	4.79977	3.18458	2.05076	5.48545	0.336961	3.17318	2.89109	2.26413	0.583634	1.63233	2.60551	4.02496	3.23527	0.532885	0.0903388	0.324831
CG11076	chr4	7113.43	7642.74	7365.37	6240.31	5980.37	5671.95	5690.81	5600.29	5470.89	5697.8	6147.55	5543.29	7373.85	5964.21	5587.33	5796.21	264.758	284.525	110.535	313.919	0.400258	0.0941728	0.0529511	6.86992e-09	0.327617	0.573954
CG11077	chr4	688.024	724.133	612.888	623.818	618.453	463.53	632.049	602.486	544.834	667.8	664.288	653.901	675.015	568.6	593.123	661.996	56.7517	91.0335	44.3547	7.22775	0.186588	-0.0609163	0.158492	0.209256	0.799318	0.333471
CG11085	chrX	0	0	0	0	0.995899	1.00549	0	0	2.81811	0	0	0	0	0.667129	0.939369	0	0	0.57777	1.62704	0	#NUM!	-0.493727	#NUM!	NA	NA	NA
CG11089	chr3R	3305.05	3114.33	3424.46	3060.44	2827.36	3854.03	2581.66	2495.87	2708.2	2852.35	3054.57	3487.12	3281.28	3247.28	2595.24	3131.35	156.427	538.234	106.815	324.271	0.338389	0.323361	0.270914	0.00862268	0.0250111	0.0502405
CG11095	chrX	377.49	352.13	406.092	476.661	483.011	510.788	441.959	494.322	459.352	532.705	567.333	417.18	378.571	490.153	465.211	505.739	26.9971	18.1497	26.6687	78.6246	-0.297322	0.0753484	0.12051	0.0398418	0.739493	0.483571
CG11099	chr2R	0	0	1.07148	0	0	0	0	1.01088	0.939369	0	0.959954	0	0.357161	0	0.650084	0.319985	0.618621	0	0.564124	0.55423	-0.864052	#NUM!	-1.02262	NA	NA	NA
CG11103	chrX	476.768	593.773	562.529	460.666	517.868	470.568	343.35	389.19	409.565	548.824	558.693	501.041	544.357	483.034	380.702	536.186	60.5821	30.5706	33.914	30.8343	0.515892	0.343464	0.494073	5.99134e-05	0.0226566	0.000165759
CG11106	chrX	0	0	0	0	0	0	1.18806	0	0	0	0	0	0	0	0.39602	0	0	0	0.685927	0	#NUM!	#NUM!	#NUM!	NA	NA	NA
CG11109	chr3L	1251.37	1331.42	1311.5	1280.69	1173.17	1173.4	1386.47	972.47	1110.33	1331.76	1306.5	1505.25	1298.1	1209.09	1156.42	1381.17	41.6716	62.0116	210.812	108.194	0.166726	0.0642499	0.256219	0.246981	0.761456	0.0749284
CG11110	chr2R	851.949	1002.34	844.329	760.312	760.867	667.644	933.816	800.62	927.157	923.407	867.799	865.144	899.539	729.607	887.198	885.45	89.1094	53.663	75.0528	32.8983	0.0199304	-0.282135	-0.00284489	0.883954	0.0354353	0.99507
CG11112	chr2R	0	0	0	0	0	0	0	0	0	0	0	0	0	0	0	0	0	0	0	0	#DIV/0!	#DIV/0!	#DIV/0!	NA	NA	NA
CG11113	chr2R	0	0	0	0	0	0	0	2.02177	0	0	0	0	0	0	0.673922	0	0	0	1.16727	0	#NUM!	#NUM!	#NUM!	NA	NA	NA
CG11122	chrX	1245.6	918.878	1366.14	1620.86	1848.39	1911.43	1577.75	2059.17	1960.46	1772.36	1695.28	1558.32	1176.87	1793.56	1865.79	1675.32	231.417	152.848	254.291	108.405	-0.66483	-0.0569624	-0.155353	1.47626e-05	0.835397	0.42317
CG11123	chr2R	1268.69	1119.98	1390.79	1111.14	1027.77	1332.27	819.762	780.402	891.461	1131.42	1336.26	1161.31	1259.82	1157.06	830.542	1209.66	135.62	157.359	56.309	110.647	0.601091	0.47834	0.542481	5.07843e-06	0.000911474	5.2835e-05
CG11125	chr2R	160.462	174.078	158.579	434.007	511.892	389.124	300.579	457.93	366.354	665.498	702.687	481.933	164.373	445.008	374.955	616.706	8.4572	62.1192	79.0271	118.188	-1.18974	0.247114	0.717867	2.01614e-09	0.35564	0.000245125
CG11127	chr2R	1224.82	1322.68	1163.63	1116.47	1082.54	1119.11	1014.6	1051.32	1088.73	1200.51	1166.34	1161.31	1237.04	1106.04	1051.55	1176.05	80.2234	20.3933	37.0629	21.3251	0.234377	0.0728872	0.161435	0.00571451	0.5669	0.0840808
CG1113	chr3R	5.77201	4.76926	7.50038	1.06636	0	2.01097	4.75224	2.02177	0.939369	23.0276	19.1991	24.4151	6.01389	1.02578	2.57113	22.2139	1.38153	1.0061	1.96491	2.70153	1.2259	-1.32568	3.11099	0.310386	0.713514	4.36221e-06
CG11131	chr3L	11.544	14.3078	6.4289	17.0617	8.96309	20.1097	9.50449	8.08707	13.1512	7.67587	3.83982	4.24611	10.7602	15.3782	10.2476	5.25393	3.99749	5.76087	2.61255	2.10727	0.0704271	0.585602	-0.963814	0.927225	0.503556	0.308982
CG11134	chrX	1519.19	1736.01	1551.51	1000.24	1009.84	1032.64	1391.22	1095.8	1301.03	1111.47	1096.27	1124.16	1602.24	1014.24	1262.68	1110.63	116.973	16.6386	151.398	13.9634	0.343598	-0.316092	-0.185112	0.0010682	0.00810537	0.126455
CG11137	chr3L	3812.99	4987.06	3743.76	3298.24	3176.92	2766.1	4290.09	3054.89	3654.15	3690.56	3417.44	3651.65	4181.27	3080.42	3666.37	3586.55	698.69	278.888	617.691	147.741	0.189587	-0.251228	-0.0317581	0.247284	0.175348	0.894718
CG11141	chr2R	1127.85	1033.34	1086.48	1064.22	1046.69	1132.18	1050.25	1121.07	1056.79	860.465	829.401	890.621	1082.56	1081.03	1076.04	860.162	47.3778	45.1547	39.1377	30.6114	0.00871931	0.00668192	-0.323045	0.955711	0.972688	0.000176005
CG11145	chr2R	0	0	0	0	0	0	0	0	0	0	0	0	0	0	0	0	0	0	0	0	#DIV/0!	#DIV/0!	#DIV/0!	NA	NA	NA
CG11147	chr2L	1208.66	1096.93	1251.49	1246.57	1161.22	1294.06	881.541	778.38	867.038	1027.03	729.565	1194.22	1185.69	1233.95	842.32	983.605	79.7993	67.315	55.8462	235.351	0.493292	0.550844	0.223711	0.00225558	0.0014117	0.238335
CG11149	chr2L	0	0	1.07148	0	2.9877	0	0	1.01088	0.939369	0	0	0	0.357161	0.995899	0.650084	0	0.618621	1.72495	0.564124	0	-0.864052	0.615373	#NUM!	NA	NA	NA
CG11151	chrX	2389.61	2582.55	2298.33	1699.77	1709.96	1456.95	1684.67	1568.89	1570.63	2060.97	2207.89	1940.47	2423.5	1622.23	1608.06	2069.78	145.11	143.224	66.3506	133.929	0.591769	0.0126524	0.364153	2.58607e-10	0.948098	0.000221719
CG11155	chr4	178.932	191.565	153.222	411.613	342.589	299.635	508.49	476.126	412.383	145.074	176.632	176.213	174.573	351.279	465.666	165.973	19.5398	56.4926	48.8999	18.1004	-1.41546	-0.406678	-1.48835	7.53356e-18	0.0357605	4.05737e-20
CG11158	chrX	289.755	272.643	273.228	279.385	249.971	237.295	326.717	232.503	294.023	198.037	202.55	220.798	278.542	255.55	284.414	207.128	9.71519	21.5927	47.8361	12.051	-0.0300986	-0.154386	-0.457468	0.895856	0.508378	0.0063951
CG11159	chr2R	0	0	0	0	0	0	0	0	0	0	0	0	0	0	0	0	0	0	0	0	#DIV/0!	#DIV/0!	#DIV/0!	NA	NA	NA
CG1116	chr3R	1026.26	1054.01	952.548	890.407	877.387	833.549	1085.89	1015.94	995.731	1017.05	1055.95	1002.08	1010.94	867.114	1032.52	1025.03	52.4363	29.7886	47.3102	27.8057	-0.0304714	-0.251874	-0.0105053	0.806444	0.0103311	0.948099
CG11162	chrX	0	0	0	0	1.9918	0	0	1.01088	0	3.07035	0.959954	0	0	0.663933	0.336961	1.34343	0	1.14997	0.583634	1.57068	#NUM!	0.978455	1.99527	NA	NA	NA
CG11164	chrX	1696.97	2224.07	1699.37	1431.05	1601.41	1348.36	1210.63	1440.51	1423.14	1803.83	1800.87	1559.38	1873.47	1460.27	1358.1	1721.36	303.627	129.03	128	140.286	0.464127	0.104651	0.341965	0.000673122	0.620285	0.019195
CG11168	chr3R	582.973	578.67	544.313	728.321	646.339	711.885	665.314	730.869	831.342	802.896	719.966	721.838	568.652	695.515	742.508	748.233	21.1877	43.3736	83.6235	47.3483	-0.38486	-0.0943256	0.011081	0.000939946	0.574064	0.956442
CG11170	chr2R	447.908	470.567	456.452	381.755	388.401	381.08	408.693	276.982	338.173	428.313	499.176	400.196	458.309	383.745	341.283	442.562	11.4431	4.04585	65.9106	51.0054	0.425354	0.169182	0.374912	0.00576225	0.423702	0.0203332
CG11178	chrX	1127.85	1117.6	1261.14	1336.14	1414.18	1506.22	1524.28	1711.43	1676.77	1231.98	1383.29	1463.85	1168.86	1418.85	1637.49	1359.71	80.0763	85.1341	99.563	117.721	-0.486386	-0.206771	-0.268195	1.46668e-06	0.0951438	0.0132255
CG11180	chr2R	1731.6	1208.21	1807.59	1727.5	1813.53	1693.24	1472.01	1819.59	1549.02	1942.76	1952.55	1846	1582.47	1744.76	1613.54	1913.77	326.335	61.9755	182.552	58.8964	-0.0280509	0.112797	0.246187	0.881775	0.616953	0.14296
CG11191	chr2R	0	0.794877	0	0	0	1.00549	0	0	0	0	0	0	0.264959	0.335162	0	0	0.458922	0.580518	0	0	#DIV/0!	#DIV/0!	#DIV/0!	NA	NA	NA
CG11192	chr2R	0	0	0	0	0	0	0	0	0	0	0	0	0	0	0	0	0	0	0	0	#DIV/0!	#DIV/0!	#DIV/0!	NA	NA	NA
CG11200	chr2R	1333.33	1227.29	1328.64	877.611	733.978	988.394	552.448	379.081	483.775	668.568	617.251	814.191	1296.42	866.661	471.768	700.003	59.9156	127.561	87.3051	102.164	1.45838	0.877389	0.569283	4.32457e-21	1.54492e-07	0.000879978
CG11210	chr2R	1511.11	1300.42	1679.01	2183.9	1820.5	2546.9	2224.05	2034.91	1908.8	1655.68	1770.16	1841.75	1496.85	2183.77	2055.92	1755.86	189.7	363.198	158.673	93.8523	-0.457855	0.0870353	-0.227603	0.00110959	0.694844	0.155499
CG11211	chr2R	1.1544	0.794877	1.07148	1.06636	0	0	0	0	0	0.767587	0	0	1.00692	0.355452	0	0.255862	0.188258	0.615661	0	0.443166	#DIV/0!	#DIV/0!	#DIV/0!	NA	NA	NA
CG11226	chr3L	0	0	0	2.13271	1.9918	0	0	1.01088	0	0.767587	0	2.12305	0	1.37484	0.336961	0.963547	0	1.19273	0.583634	1.07501	#NUM!	2.02861	1.51577	NA	NA	NA
CG11227	chrX	0	0	0	0	0	0	0	0	0	0	0	0	0	0	0	0	0	0	0	0	#DIV/0!	#DIV/0!	#DIV/0!	NA	NA	NA
CG11236	chr2L	19.6248	25.4361	11.7863	0	2.9877	18.0988	19.009	10.1088	10.3331	3.83793	1.91991	4.24611	18.9491	7.02882	13.1503	3.33465	6.84992	9.70255	5.07501	1.24208	0.527032	-0.90374	-1.97949	0.513994	0.505643	0.127755
CG1124	chr3R	353.247	383.131	342.875	262.324	223.081	233.273	273.254	129.393	183.177	310.105	136.314	300.412	359.751	239.559	195.275	248.944	20.9012	20.3623	72.6895	97.6608	0.881493	0.294878	0.350313	0.00393991	0.506455	0.34649
CG11241	chr3L	630.304	503.157	583.958	306.044	268.893	307.679	281.571	295.178	401.111	486.65	448.299	512.718	572.473	294.205	325.953	482.555	64.3468	21.9366	65.4431	32.404	0.812544	-0.147841	0.56603	2.86396e-07	0.535516	0.000659984
CG11247	chr3L	2027.13	1845.7	2071.18	1982.36	2114.29	1932.55	1637.15	1885.3	1685.23	2200.67	2124.38	2171.88	1981.34	2009.73	1735.89	2165.64	119.509	93.9156	131.604	38.5268	0.190798	0.211326	0.31912	0.0405235	0.0399137	0.000339058
CG11248	chr3L	1643.87	1551.6	1676.87	1883.18	1856.36	1822.95	1799.91	1914.61	1782.92	1028.57	912.917	1058.34	1624.11	1854.16	1832.48	999.942	64.9304	30.1779	71.6322	76.8224	-0.174147	0.0169684	-0.873884	0.0456843	0.918894	1.2461e-28
CG11249	chr3L	0	0	0	0	1.9918	2.01097	1.18806	3.03265	0.939369	0.767587	0.959954	0	0	1.33426	1.72003	0.575847	0	1.15554	1.14355	0.507889	#NUM!	-0.366394	-1.57867	NA	NA	NA
CG11251	chr3L	0	0	0	0	0	0	0	2.02177	0	0	0	0	0	0	0.673922	0	0	0	1.16727	0	#NUM!	#NUM!	#NUM!	NA	NA	NA
CG11257	chr2R	310.534	302.053	295.729	382.822	307.733	313.712	318.4	250.699	283.69	320.084	347.503	338.627	302.772	334.756	284.263	335.405	7.42862	41.7338	33.8543	13.9911	0.0910068	0.235882	0.238677	0.597867	0.192907	0.143502
CG11262	chr3L	0	0	0	0	0	1.00549	0	0	0	0	0	0	0	0.335162	0	0	0	0.580518	0	0	#DIV/0!	#DIV/0!	#DIV/0!	NA	NA	NA
CG11263	chr3L	522.944	662.132	487.525	667.539	655.302	659.6	402.753	362.907	351.324	950.272	1034.83	866.206	557.534	660.813	372.328	950.436	92.2999	6.20819	26.9776	84.3125	0.582485	0.827669	1.35202	2.25192e-05	1.97325e-09	2.85928e-26
CG11267	chr3L	10014.4	9610.86	9384.05	8073.38	7330.81	7206.33	6411.97	6593.99	6509.83	7780.26	7894.66	8120.68	9669.78	7536.84	6505.26	7931.87	319.301	468.808	91.0983	173.234	0.571876	0.212353	0.286053	1.41248e-19	0.00424662	2.03421e-05
CG11269	chr2R	0	0	0	1.06636	0	0	1.18806	0	0	0	0	0	0	0.355452	0.39602	0	0	0.615661	0.685927	0	#NUM!	-0.15592	#NUM!	NA	NA	NA
CG11275	chr2R	188.168	177.258	199.296	167.418	140.422	119.653	129.499	120.295	98.6338	186.524	191.031	145.429	188.24	142.498	116.143	174.328	11.0193	23.95	15.8459	25.1283	0.69668	0.295041	0.585907	0.000566247	0.27326	0.00502018
CG11279	chr3L	709.958	889.467	679.32	568.368	524.839	520.842	791.249	487.246	728.951	786.009	825.561	834.36	759.582	538.016	669.148	815.31	113.522	26.3609	160.582	25.7542	0.182879	-0.314676	0.285022	0.351775	0.151158	0.151622
CG11286	chr3R	0	0	0	0	0	0	0	0	0	0	0	0	0	0	0	0	0	0	0	0	#DIV/0!	#DIV/0!	#DIV/0!	NA	NA	NA
CG1129	chr3R	1945.17	1942.68	1882.6	2010.08	1706.97	1861.16	2243.06	1780.17	1908.8	1622.68	1552.25	1762.13	1923.48	1859.4	1977.34	1645.69	35.4295	151.562	238.938	106.819	-0.0398422	-0.0887223	-0.264872	0.784477	0.593245	0.0243234
CG11291	chr2R	0	0	0	0	0	0	0	0	0	0	0	1.06153	0	0	0	0.353842	0	0	0	0.612873	#DIV/0!	#DIV/0!	#DIV/0!	NA	NA	NA
CG11294	chrX	0	0	0	0	0	0	0	0	0	0	0	0	0	0	0	0	0	0	0	0	#DIV/0!	#DIV/0!	#DIV/0!	NA	NA	NA
CG11298	chr2R	0	0	0	0	0	0	0	0	0	0	0	0	0	0	0	0	0	0	0	0	#DIV/0!	#DIV/0!	#DIV/0!	NA	NA	NA
CG11300	chr2R	0	0	0	0	0	0	0	0	0	0	0	0	0	0	0	0	0	0	0	0	#DIV/0!	#DIV/0!	#DIV/0!	NA	NA	NA
CG11307	chr3L	2233.77	2193.86	2208.33	2144.44	2287.58	1859.15	1574.18	1992.45	1743.47	2119.31	2039.9	1827.95	2211.99	2097.06	1770.03	1995.72	20.2044	218.113	210.396	150.62	0.321565	0.244589	0.173132	0.00657825	0.0782001	0.201217
CG11309	chr3L	1650.8	1677.99	1553.65	1487.57	1573.52	1427.79	1716.75	1400.07	1590.35	1123.75	1073.23	1061.53	1627.48	1496.29	1569.06	1086.17	65.365	73.2553	159.408	33.0663	0.0527385	-0.0685059	-0.530652	0.651625	0.654015	2.23856e-08
CG11313	chr3R	0	0	0	1.06636	0	0	2.37612	1.01088	0	1.53517	0.959954	1.06153	0	0.355452	1.129	1.18555	0	0.615661	1.19246	0.307011	#NUM!	-1.66732	0.0705104	NA	NA	NA
CG11317	chr3R	0	3.17951	0	0	0	1.00549	0	0	0	0	0.959954	1.06153	1.05984	0.335162	0	0.673827	1.83569	0.580518	0	0.585757	#DIV/0!	#DIV/0!	#DIV/0!	NA	NA	NA
CG11318	chr3R	0	0	1.07148	0	0	0	0	1.01088	0.939369	0	0	0	0.357161	0	0.650084	0	0.618621	0	0.564124	0	-0.864052	#NUM!	#NUM!	NA	NA	NA
CG11319	chr2L	11.544	14.3078	10.7148	14.929	25.8934	14.0768	59.4031	62.6748	76.0889	11.5138	12.4794	9.55374	12.1889	18.2997	66.0556	11.1823	1.88128	6.59008	8.84177	1.49073	-2.43811	-1.85186	-2.56246	1.59212e-10	8.28876e-07	1.68981e-11
CG11322	chr2L	0	0	0	0	0	0	0	2.02177	0	0	0	0	0	0	0.673922	0	0	0	1.16727	0	#NUM!	#NUM!	#NUM!	NA	NA	NA
CG11327	chr2L	3.46321	0.794877	4.28593	2.13271	0.995899	3.01646	2.37612	2.02177	0	0.767587	0.959954	0	2.84801	2.04836	1.46596	0.575847	1.82503	1.01292	1.28186	0.507889	0.958103	0.482619	-1.34809	0.555341	NA	0.719257
CG11333	chr3R	0	0	0	0	0	0	0	0	0	0	0	0	0	0	0	0	0	0	0	0	#DIV/0!	#DIV/0!	#DIV/0!	NA	NA	NA
CG11334	chr3R	2506.21	2648.53	2609.06	2508.07	2553.49	2397.08	1970.99	2473.63	2395.39	3021.99	2934.58	2888.41	2587.93	2486.21	2280.01	2948.33	73.4757	80.4602	270.456	67.8397	0.182763	0.124912	0.37086	0.0708117	0.33201	9.79304e-05
CG11342	chr3L	462.915	500.772	486.453	446.803	463.093	387.113	527.499	488.257	440.564	443.665	588.452	449.026	483.38	432.336	485.44	493.714	19.1147	40.0028	43.5359	82.089	-0.00613403	-0.167139	0.0243835	0.986993	0.421906	0.916018
CG11345	chr3L	0	0	0	0	0	0	0	0	0	0	0	0	0	0	0	0	0	0	0	0	#DIV/0!	#DIV/0!	#DIV/0!	NA	NA	NA
CG11349	chr3L	0	0	0	0	0	0	0	0	0	0	0	0	0	0	0	0	0	0	0	0	#DIV/0!	#DIV/0!	#DIV/0!	NA	NA	NA
CG11350	chr3L	0	0	0	0	0.995899	0	0	0	0	0	0	0	0	0.331966	0	0	0	0.574983	0	0	#DIV/0!	#DIV/0!	#DIV/0!	NA	NA	NA
CG11353	chr3L	285.137	295.694	300.015	384.954	325.659	387.113	269.69	228.46	288.386	264.817	178.551	315.274	293.616	365.909	262.179	252.881	7.65361	34.8739	30.6614	69.1382	0.163379	0.480934	-0.0520926	0.488118	0.0354353	0.862493
CG11356	chrX	0	2.38463	0	0	0.995899	2.01097	0	0	0	0.767587	0	0	0.794877	1.00229	0	0.255862	1.37677	1.0055	0	0.443166	#DIV/0!	#DIV/0!	#DIV/0!	NA	NA	NA
CG11357	chr3L	4100.44	4168.33	4320.22	4500.02	4634.91	4283.38	4351.87	4745.09	4163.28	1530.57	1507.13	1599.72	4196.33	4472.77	4420.08	1545.81	112.534	177.347	296.838	48.1405	-0.074944	0.0170965	-1.51571	0.392605	0.906641	4.12764e-103
CG1136	chr3L	38.0953	35.7695	47.1453	36.2561	31.8688	38.2085	42.7702	37.4027	47.9078	30.7035	50.8776	52.0148	40.3367	35.4445	42.6936	44.532	6.01	3.24687	5.253	11.9893	-0.081927	-0.268459	0.060822	0.845043	0.603463	0.932927
CG11360	chr4	1006.64	799.646	964.335	1294.56	1206.03	1365.45	1178.56	1164.54	991.974	1200.51	1345.86	1223.94	923.54	1288.68	1111.69	1256.77	109.36	79.8711	103.913	78.0377	-0.267507	0.213141	0.176964	0.032863	0.150677	0.204071
CG11362	chr2R	3.46321	0.794877	4.28593	2.13271	0	2.01097	2.37612	4.04353	0.939369	0	0.959954	2.12305	2.84801	1.38123	2.45301	1.02767	1.82503	1.19773	1.55351	1.06315	0.2154	-0.8286	-1.25518	0.909524	NA	0.56858
CG11367	chr3L	1392.21	1503.11	1629.73	1544.08	1627.3	1479.07	1262.91	1491.05	1507.69	1830.69	1702.96	1493.57	1508.35	1550.15	1420.55	1675.74	118.845	74.2998	136.774	170.203	0.0865209	0.12596	0.238349	0.533777	0.439443	0.058124
CG11368	chrX	0	0	0	0	0	0	0	0	0	0	0	0	0	0	0	0	0	0	0	0	#DIV/0!	#DIV/0!	#DIV/0!	NA	NA	NA
CG11369	chrX	0	0	0	0	0	0	0	0	0	0	0	0	0	0	0	0	0	0	0	0	#DIV/0!	#DIV/0!	#DIV/0!	NA	NA	NA
CG1137	chr3R	0	0	0	0	0	0	0	1.01088	0	0	0	0	0	0	0.336961	0	0	0	0.583634	0	#NUM!	#NUM!	#NUM!	NA	NA	NA
CG11370	chr3L	0	0	0	0	0	0	0	0	0.939369	0	0	0	0	0	0.313123	0	0	0	0.542345	0	#NUM!	#NUM!	#NUM!	NA	NA	NA
CG11373	chr3R	0	0	0	0	0	0	0	1.01088	0	0	0	0	0	0	0.336961	0	0	0	0.583634	0	#NUM!	#NUM!	#NUM!	NA	NA	NA
CG11374	chr2L	6.92642	3.17951	6.4289	3.19907	6.97129	11.0604	17.8209	10.1088	12.2118	11.5138	6.71968	9.55374	5.51161	7.07691	13.3805	9.26241	2.03492	3.93171	3.98666	2.4103	-1.27959	-0.918943	-0.530675	0.0879142	0.308242	0.529993
CG11377	chr2L	3191.92	3190.64	3292.67	2827.98	2785.53	2462.44	2623.24	2759.71	2762.68	2856.96	2777.15	2772.71	3225.08	2691.98	2715.21	2802.27	58.54	199.92	79.6645	47.4116	0.248268	-0.0123963	0.0455318	0.00105102	0.932703	0.66124
CG11378	chrX	905.052	861.647	812.184	447.869	356.532	459.508	672.443	484.213	676.346	663.195	525.095	653.901	859.627	421.303	611.001	614.063	46.4666	56.3945	109.819	77.189	0.492538	-0.536315	0.00721415	0.00273447	0.00322276	0.977504
CG11379	chrX	0	0	1.07148	0	0	0	0	0	0	0	0.959954	0	0.357161	0	0	0.319985	0.618621	0	0	0.55423	#DIV/0!	#DIV/0!	#DIV/0!	NA	NA	NA
CG1138	chr3R	0	0	0	0	0	0	0	0	0	0	0	0	0	0	0	0	0	0	0	0	#DIV/0!	#DIV/0!	#DIV/0!	NA	NA	NA
CG11380	chrX	17.316	17.4873	16.0722	25.5925	22.9057	19.1043	29.7015	27.2938	13.1512	26.0979	23.9989	20.169	16.9585	22.5342	23.3822	23.4219	0.772301	3.26006	8.94173	3.00627	-0.463399	-0.0532959	0.00245084	0.406834	0.966466	0.971959
CG11381	chrX	13439.6	13934.2	13726.8	16672.5	15151.6	15152.7	12282.2	10496	12115	11369.5	9054.29	13590.7	13700.2	15658.9	11631.1	11338.2	248.389	877.759	986.548	2268.38	0.23621	0.429001	-0.0367965	0.0996886	0.00338053	0.859639
CG11382	chrX	283.983	320.335	316.088	317.774	266.901	273.493	460.968	357.853	397.353	326.992	334.064	505.287	306.802	286.056	405.391	388.781	19.8756	27.6658	52.0254	100.959	-0.402007	-0.503018	-0.0603573	0.0452603	0.0208919	0.828999
CG11384	chrX	0	0	1.07148	0	0	0	0	0	0	0	0	0	0.357161	0	0	0	0.618621	0	0	0	#DIV/0!	#DIV/0!	#DIV/0!	NA	NA	NA
CG1139	chr3L	3.46321	2.38463	8.57186	0	1.9918	1.00549	2.37612	0	4.69685	0.767587	3.83982	6.36916	4.80657	0.999095	2.35766	3.65886	3.30514	0.995915	2.34848	2.80517	1.02765	-1.23866	0.634039	0.479134	0.733766	0.762865
CG11391	chr3R	0	0	0	0	0	0	0	0	0	0	0	0	0	0	0	0	0	0	0	0	#DIV/0!	#DIV/0!	#DIV/0!	NA	NA	NA
CG11396	chr3L	1706.21	1939.5	1771.16	1720.03	1652.2	1466	1544.48	1820.6	1684.29	1787.71	1728.88	1767.44	1805.62	1612.74	1683.12	1761.34	120.404	131.531	138.064	29.8862	0.101356	-0.0616241	0.0655352	0.374381	0.695436	0.628882
CG11398	chrX	1096.68	1147.8	1151.84	1257.23	1193.09	1052.75	1158.36	1116.02	966.611	1282.64	1345.86	1145.39	1132.11	1167.69	1080.33	1257.96	30.7474	104.583	100.733	102.487	0.0675435	0.112185	0.219616	0.615881	0.48333	0.0737296
CG11399	chr3L	3636.37	2774.92	4021.28	5009.74	5291.21	6234.02	5468.65	6848.73	5914.27	4189.49	3961.73	3992.4	3477.52	5511.66	6077.22	4047.87	638.184	641.22	704.326	123.596	-0.805352	-0.140924	-0.586246	8.87218e-09	0.50067	5.20853e-05
CG11400	chr2R	100.433	87.4365	69.6464	34.1234	51.7868	34.1866	55.8389	43.468	52.6047	35.309	42.238	45.6457	85.8386	40.0322	50.6372	41.0642	15.4554	10.1798	6.41585	5.26736	0.76143	-0.339035	-0.302315	0.00949024	0.4569	0.428289
CG11403	chrX	1490.33	1791.65	1574.01	1806.41	2011.72	1750.55	1784.47	1837.79	1882.5	1903.61	1965.99	2055.12	1618.66	1856.23	1834.92	1974.91	155.544	137.524	49.0769	76.1435	-0.18091	0.0166575	0.106069	0.0834299	0.932877	0.376338
CG11404	chr3L	1.1544	0	0	0	0	0	0	0	0	0	0	0	0.384801	0	0	0	0.666495	0	0	0	#DIV/0!	#DIV/0!	#DIV/0!	NA	NA	NA
CG11406	chr2R	0	0	2.14297	2.13271	0	0	0	1.01088	0.939369	0	3.83982	2.12305	0.714322	0.710904	0.650084	1.98762	1.23724	1.23132	0.564124	1.92349	0.135948	0.129028	1.61235	NA	NA	0.567553
CG11407	chr3R	5.77201	7.94877	10.7148	4.26542	5.9754	8.0439	5.94031	3.03265	1.87874	3.83793	2.87986	8.49222	8.1452	6.09491	3.61723	5.07	2.47726	1.89207	2.09294	3.00219	1.17106	0.752718	0.487101	0.21574	0.59255	0.750274
CG11409	chrX	100.433	77.1031	120.006	170.617	125.483	170.933	76.0359	66.7183	84.5432	30.7035	20.159	32.9073	99.1807	155.678	75.7658	27.9233	21.4789	26.1496	8.91554	6.81372	0.388513	1.03894	-1.44008	0.197875	0.000131188	2.4802e-06
CG11413	chr2R	1.1544	0	0	0	0	0	0	1.01088	2.81811	2.30276	0.959954	0	0.384801	0	1.27633	1.08757	0.666495	0	1.42768	1.15667	-1.72982	#NUM!	-0.230892	NA	NA	NA
CG11414	chr2R	3757.58	3287.61	4022.35	4310.21	4336.15	4399.01	3751.9	4337.7	4291.98	4572.51	4465.71	4386.23	3689.18	4348.45	4127.19	4474.82	372.114	45.6599	325.817	93.4755	-0.161861	0.0753421	0.116668	0.107291	0.599025	0.305412
CG11417	chrX	2253.39	1991.17	2382.98	2254.28	2479.79	2480.54	2066.04	2422.08	2340.91	2467.02	2716.67	2272.73	2209.18	2404.87	2276.34	2485.47	199.613	130.416	186.594	222.545	-0.043206	0.0792407	0.126805	0.749546	0.64319	0.342812
CG1142	chr3R	1379.51	1376.73	1245.06	1130.34	1014.82	929.07	1177.37	884.523	1063.37	1238.12	1254.66	1148.57	1333.77	1024.74	1041.75	1213.78	76.8323	101	147.614	57.0769	0.356494	-0.0237506	0.220498	0.00460524	0.928221	0.114448
CG11425	chr3L	30.0145	34.1797	37.5019	17.0617	7.96719	27.1482	14.2567	4.04353	5.63622	1.53517	6.71968	14.8614	33.8987	17.3923	7.97883	7.70541	3.75162	9.59476	5.49484	6.71756	2.08698	1.1242	-0.050305	0.00239091	0.285198	0.958103
CG11426	chr3L	46.1761	42.1285	52.5027	41.5879	26.8893	39.214	73.6598	45.4897	78.907	69.8504	47.9977	41.3996	46.9357	35.8971	66.0189	53.0825	5.22865	7.89074	17.9713	14.8914	-0.492191	-0.879013	-0.31464	0.182018	0.0288005	0.476253
CG1143	chr3L	0	0.794877	0	0	4.9795	1.00549	4.75224	4.04353	6.57558	1.53517	0.959954	3.18458	0.264959	1.99499	5.12379	1.89324	0.458922	2.63309	1.30628	1.15473	-4.27337	-1.36083	-1.43636	0.0414995	0.343947	0.260138
CG11436	chrX	1367.97	1381.5	1301.85	1352.14	1416.17	1277.97	1322.31	1349.53	1327.33	1696.37	1640.56	1427.75	1350.44	1348.76	1333.06	1588.23	42.6173	69.1591	14.4844	141.748	0.0186896	0.0168963	0.252679	0.880815	0.928682	0.00812234
CG11437	chr3L	0	0	0	1.06636	0.995899	0	0	0	0	0	0.959954	0	0	0.687418	0	0.319985	0	0.596363	0	0.55423	#DIV/0!	#DIV/0!	#DIV/0!	NA	NA	NA
CG11438	chr3L	20.7792	32.59	22.5011	45.8533	67.7211	65.3567	35.6418	28.3047	39.4535	33.0062	13.4394	23.3536	25.2901	59.6437	34.4667	23.2664	6.3802	12.0012	5.66653	9.78372	-0.446629	0.791167	-0.566955	0.372673	0.0758269	0.270658
CG11444	chrX	6303.04	6822.43	5506.35	4747.42	4077.21	4082.28	5898.72	4225.49	4812.39	4647.74	4691.3	5231.2	6210.61	4302.3	4978.87	4856.75	662.889	385.489	848.948	325.021	0.318916	-0.210709	-0.0358278	0.0226532	0.225878	0.867071
CG11447	chr3R	423.666	487.26	397.52	374.291	438.196	385.102	382.556	361.896	360.718	412.962	430.06	426.734	436.148	399.196	368.39	423.252	46.1535	34.2044	12.2821	9.06527	0.243586	0.115864	0.200282	0.0620241	0.528536	0.167994
CG11449	chr3L	0	0	0	0	0	0	0	0	0	0	0	0	0	0	0	0	0	0	0	0	#DIV/0!	#DIV/0!	#DIV/0!	NA	NA	NA
CG11453	chr3R	10.3896	13.5129	9.64335	0	0.995899	1.00549	4.75224	5.05442	2.81811	4.60552	3.83982	4.24611	11.182	0.667129	4.20826	4.23048	2.05286	0.57777	1.21335	0.38309	1.40988	-2.65719	0.00759931	0.0468204	0.265753	0.993327
CG11454	chr2L	705.34	750.364	654.676	538.51	451.142	417.277	493.045	430.636	456.533	937.223	929.236	958.559	703.46	468.976	460.072	941.673	47.8715	62.5529	31.3547	15.1594	0.61261	0.0276566	1.03337	1.90508e-07	0.907844	2.10096e-20
CG11456	chr3L	969.698	1036.52	964.335	1050.36	1083.54	901.922	1191.63	1138.25	1056.79	761.446	773.723	682.562	990.184	1011.94	1128.89	739.244	40.2171	96.712	67.9035	49.4702	-0.189136	-0.157781	-0.610783	0.0997614	0.254154	4.03829e-09
CG11458	chr3L	0	0	0	0	0	0	0	0	0	0	0	0	0	0	0	0	0	0	0	0	#DIV/0!	#DIV/0!	#DIV/0!	NA	NA	NA
CG11459	chr3R	6.92642	0.794877	2.14297	0	3.9836	1.00549	3.56418	1.01088	0	1.53517	0.959954	1.06153	3.28809	1.66303	1.52502	1.18555	3.22218	2.0716	1.83687	0.307011	1.10842	0.124982	-0.363272	0.513837	NA	0.929642
CG1146	chr3L	1237.52	1190.73	1281.49	1479.04	1639.25	1343.33	1267.66	1396.03	1388.39	782.938	745.884	660.27	1236.58	1487.21	1350.69	729.698	45.3914	148.129	72.0089	62.9159	-0.127345	0.138904	-0.888329	0.286004	0.333346	3.7237e-18
CG11470	chr3R	1.1544	0	0	0	0.995899	0	0	0	0	0	1.91991	1.06153	0.384801	0.331966	0	0.993812	0.666495	0.574983	0	0.961744	#DIV/0!	#DIV/0!	#DIV/0!	NA	NA	NA
CG11474	chr2R	1332.18	1531.73	1482.93	1223.11	1411.19	1229.71	1097.77	1197.9	1148.85	1429.25	1572.41	1371.49	1448.95	1288	1148.17	1457.71	104.024	106.733	50.0675	103.437	0.335667	0.165799	0.344371	0.0011594	0.208898	0.00107736
CG11475	chr2R	30.0145	20.6668	27.8586	39.4552	41.8278	38.2085	46.3344	38.4136	46.9685	20.7248	22.0789	31.8458	26.1799	39.8305	43.9055	24.8832	4.8947	1.83858	4.76669	6.06769	-0.745939	-0.140528	-0.819229	0.037386	0.806495	0.0270968
CG11486	chr3L	8594.53	8142.72	9180.47	10640.1	10599.4	10563.6	9054.21	11023.7	9915.98	11199.9	10637.3	9674.76	8639.24	10601	9997.96	10504	520.317	38.2526	987.289	771.238	-0.21073	0.0844995	0.0712271	0.0331396	0.547756	0.567692
CG11498	chr3R	6.92642	7.94877	6.4289	1.06636	3.9836	5.02744	1.18806	1.01088	6.57558	15.3517	4.79977	5.30763	7.10136	3.35913	2.92484	8.48638	0.774891	2.05305	3.16288	5.95099	1.27974	0.199728	1.53679	0.307984	0.954425	0.187939
CG11504	chr3R	1448.78	1673.22	1681.16	1824.53	1930.05	1957.68	1683.48	1997.51	2086.34	2011.84	2055.26	1832.2	1601.05	1904.09	1922.44	1966.43	131.933	70.2686	211.658	118.264	-0.263923	-0.0138384	0.0326414	0.0181166	0.945791	0.848347
CG11523	chr3L	1363.35	1195.49	1286.85	959.72	1062.62	1090.95	661.75	970.448	942.187	1576.62	1558.01	1410.77	1281.9	1037.77	858.128	1515.13	84.0368	69.058	170.655	90.8594	0.579016	0.274216	0.820179	4.39172e-05	0.120406	2.29757e-09
CG11529	chr3L	11.544	7.15389	11.7863	39.4552	11.9508	31.1701	36.8299	24.2612	30.9992	6.14069	6.71968	7.43069	10.1614	27.5254	30.6968	6.76369	2.6074	14.1098	6.28981	0.646123	-1.59499	-0.157325	-2.1822	0.00366916	0.850832	0.000247248
CG11534	chr3L	886.581	964.186	876.473	969.317	875.395	982.361	1083.51	931.023	973.187	895.006	1030.99	970.236	909.08	942.358	995.907	965.411	47.9898	58.3569	78.7423	68.1207	-0.131604	-0.0797362	-0.0448684	0.277243	0.627101	0.771004
CG11537	chr3L	3363.93	3094.46	3303.38	3589.35	3465.73	3603.67	3121.04	3544.16	3468.15	3582.33	3419.36	3330.01	3253.92	3552.92	3377.78	3443.9	141.381	75.8448	225.572	127.936	-0.0538962	0.0729277	0.0279663	0.553233	0.523071	0.811693
CG11539	chr3R	309.38	334.643	310.73	275.12	319.684	280.531	280.382	298.211	265.841	386.096	362.863	370.473	318.251	291.778	281.478	373.144	14.212	24.3179	16.2123	11.8447	0.177142	0.0518487	0.406709	0.203081	0.813162	0.00160957
CG11550	chr3R	0	0.794877	1.07148	0	0.995899	0	1.18806	0	0	0	0	0	0.62212	0.331966	0.39602	0	0.55624	0.574983	0.685927	0	0.651618	-0.254538	#NUM!	NA	NA	NA
CG11555	chr2L	1765.08	1699.45	1519.36	1391.59	1403.22	1229.71	1445.87	1435.45	1371.48	1485.28	1640.56	1415.02	1661.3	1341.51	1417.6	1513.62	127.224	96.9945	40.2811	115.413	0.228858	-0.079595	0.0945504	0.0276466	0.604127	0.452194
CG11560	chr3L	580.664	657.363	592.53	518.249	573.638	436.381	405.129	453.887	441.504	719.229	756.444	626.301	610.186	509.423	433.506	700.658	41.2852	69.0526	25.3435	67.0296	0.493196	0.23281	0.692657	0.000263926	0.1788	1.43512e-07
CG11562	chr2L	982.397	1214.57	856.115	882.943	1003.87	754.115	1076.38	961.35	998.55	1020.12	975.314	1009.51	1017.69	880.308	1012.09	1001.65	181.817	124.896	58.7007	23.4164	0.00796075	-0.201263	-0.0149661	0.958047	0.300874	0.95241
CG11563	chr3R	2232.61	2177.96	2019.75	1684.84	1609.37	1436.84	1605.07	1506.22	1371.48	1638.8	1666.48	1488.26	2143.44	1577.02	1494.26	1597.85	110.554	127.127	117.254	95.9079	0.520502	0.0777733	0.096702	9.86858e-08	0.611647	0.440149
CG11566	chrX	0	0	0	0	0	0	0	0	0	0	0	0	0	0	0	0	0	0	0	0	#DIV/0!	#DIV/0!	#DIV/0!	NA	NA	NA
CG11570	chr3L	0	0	0	0	0	0	0	0	0	0	0	0	0	0	0	0	0	0	0	0	#DIV/0!	#DIV/0!	#DIV/0!	NA	NA	NA
CG11581	chrX	0	0	0	0	0	0	0	0	0	0	0	0	0	0	0	0	0	0	0	0	#DIV/0!	#DIV/0!	#DIV/0!	NA	NA	NA
CG11583	chr3L	2916.02	2764.58	2905.86	2550.72	2620.21	2485.56	2159.9	2264.38	2340.91	2785.57	2824.19	2823.66	2862.15	2552.17	2255.06	2811.14	84.6534	67.3347	90.8654	22.144	0.343936	0.178556	0.317989	1.01389e-07	0.0186777	1.0382e-06
CG11584	chrX	0	0	0	1.06636	1.9918	6.03292	0	1.01088	1.87874	0	0	0	0	3.03036	0.963207	0	0	2.64115	0.940276	0	#NUM!	1.65357	#NUM!	NA	NA	0.630324
CG11585	chrX	0	0	0	0	0	0	0	0	0	0	0.959954	0	0	0	0	0.319985	0	0	0	0.55423	#DIV/0!	#DIV/0!	#DIV/0!	NA	NA	NA
CG11586	chr3L	1148.63	1240.01	1032.91	1037.56	1045.69	888.851	1084.7	1023.01	1018.28	924.942	930.196	906.544	1140.52	990.703	1042	920.561	103.787	88.3003	37.0579	12.4196	0.130336	-0.0728261	-0.178766	0.254833	0.659488	0.136885
CG11588	chr3L	0	0	0	0	0	0	0	0	0	0	0.959954	0	0	0	0	0.319985	0	0	0	0.55423	#DIV/0!	#DIV/0!	#DIV/0!	NA	NA	NA
CG11590	chrX	1313.71	1325.85	1173.27	1008.77	1119.39	976.328	1066.88	990.666	1135.7	1264.98	1274.82	1172.99	1270.95	1034.83	1064.41	1237.6	84.8043	75.0065	72.5473	56.1689	0.255844	-0.0406649	0.217482	0.013198	0.817741	0.047394
CG11593	chr3L	2469.27	2321.04	2447.27	3128.69	3025.54	3131.09	2976.09	3459.24	3276.52	3204.67	3371.36	2711.14	2412.52	3095.11	3237.29	3095.72	79.9879	60.2561	243.952	343.329	-0.424241	-0.0647958	-0.0645074	1.53248e-05	0.679875	0.632735
CG11594	chr3L	145.455	166.924	137.15	67.1804	61.7457	106.582	91.4807	77.838	81.7251	76.7587	47.9977	72.1838	149.843	78.5026	83.6813	65.6467	15.3645	24.4685	7.02857	15.4547	0.840474	-0.0921644	-0.350182	0.00141836	0.860171	0.310034
CG11596	chrX	3346.61	3375.05	3374.1	3534.97	3671.88	3474.96	3331.32	3620.98	3409.91	4032.13	3898.37	3724.9	3365.25	3560.6	3454.07	3885.13	16.1501	100.93	149.795	154.044	-0.0375833	0.0438239	0.169666	0.649223	0.682749	0.016415
CG11597	chr3L	120.058	123.206	115.72	141.825	141.418	110.604	111.678	109.175	131.512	123.581	97.9153	132.691	119.661	131.282	117.455	118.063	3.75859	17.9094	12.2376	18.0327	0.0268494	0.160564	0.00744392	0.929227	0.617039	0.992598
CG11598	chr3R	5.77201	1.58975	0	4.26542	0	1.00549	1.18806	3.03265	1.87874	0.767587	0.959954	1.06153	2.45392	1.75697	2.03315	0.929689	2.98146	2.2298	0.931938	0.149289	0.271373	-0.210627	-1.1289	0.903513	NA	0.672698
CG11600	chr3R	0	0.794877	0	0	0	1.00549	2.37612	0	0	0	0.959954	0	0.264959	0.335162	0.792041	0.319985	0.458922	0.580518	1.37185	0.55423	-1.57981	-1.24071	-1.30757	NA	NA	NA
CG11601	chr2L	1018.18	1093.75	958.977	1027.97	972.994	969.29	1102.52	1005.83	1113.15	1082.3	966.674	992.528	1023.64	990.083	1073.83	1013.83	67.5519	32.8604	59.1337	60.6845	-0.0690669	-0.117149	-0.0829512	0.560715	0.370506	0.508034
CG11608	chr3R	0	0	0	0	0	0	1.18806	0	0	0	0	0	0	0	0.39602	0	0	0	0.685927	0	#NUM!	#NUM!	#NUM!	NA	NA	NA
CG1161	chr3R	2824.82	3112.74	2696.92	2286.27	2278.62	2065.27	2357.11	2222.93	2344.67	2951.37	2822.27	3002	2878.16	2210.05	2308.24	2925.21	212.977	125.442	74.1379	92.6778	0.318356	-0.0627113	0.341749	0.000136509	0.633318	5.01413e-05
CG11617	chr2L	4.61761	0.794877	0	5.33178	3.9836	4.02195	3.56418	3.03265	2.81811	1.53517	4.79977	3.18458	1.80416	4.44578	3.13831	3.17318	2.46872	0.767542	0.384098	1.63233	-0.79866	0.502445	0.0159376	0.626583	0.760702	1
CG11619	chr3L	6.92642	5.56414	10.7148	12.7963	8.96309	16.0878	23.7612	16.1741	14.0905	3.83793	23.0389	4.24611	7.73513	12.6157	18.0086	10.3743	2.66888	3.56578	5.08965	10.9698	-1.21919	-0.513466	-0.795673	0.131375	0.618422	0.34839
CG11626	chr3R	2.30881	2.38463	2.14297	1.06636	2.9877	0	2.37612	5.05442	3.75748	2.30276	1.91991	0	2.2788	1.35135	3.72934	1.40756	0.123595	1.5141	1.33937	1.23392	-0.710645	-1.46452	-1.40573	0.586021	0.418429	0.380127
CG11629	chr2L	0	0	0	1.06636	0	0	0	0	0	0	0	0	0	0.355452	0	0	0	0.615661	0	0	#DIV/0!	#DIV/0!	#DIV/0!	NA	NA	NA
CG11630	chr2L	1.1544	0	1.07148	2.13271	1.9918	0	2.37612	0	0	0	0.959954	0	0.741962	1.37484	0.792041	0.319985	0.643894	1.19273	1.37185	0.55423	-0.0942297	0.795614	-1.30757	NA	NA	NA
CG11634	chr2L	0	0	0	0	0	0	0	0	0	0	0	0	0	0	0	0	0	0	0	0	#DIV/0!	#DIV/0!	#DIV/0!	NA	NA	NA
CG11635	chr2R	0	0	0	0	0	0	0	1.01088	0	0	0.959954	0	0	0	0.336961	0.319985	0	0	0.583634	0.55423	#NUM!	#NUM!	-0.0745787	NA	NA	NA
CG11638	chrX	100.433	85.0518	85.7186	46.9197	48.7991	53.2908	21.3851	34.37	28.1811	39.1469	20.159	29.7228	90.4012	49.6698	27.9787	29.6762	8.69424	3.27363	6.49483	9.49402	1.69201	0.82804	0.0849773	4.04105e-08	0.0385287	0.890755
CG11655	chrX	743.435	773.415	738.252	758.179	768.834	876.785	635.613	699.531	682.921	805.966	791.962	729.269	751.701	801.266	672.688	775.732	18.983	65.6179	33.1651	40.8431	0.16022	0.252343	0.205621	0.149456	0.0324111	0.0658682
CG11656	chr3R	0	0	0	0	0	0	1.18806	0	0	0.767587	0	0	0	0	0.39602	0.255862	0	0	0.685927	0.443166	#NUM!	#NUM!	-0.630208	NA	NA	NA
CG11658	chr3L	432.901	335.438	346.089	382.822	389.397	329.8	567.893	479.159	480.957	423.708	298.546	368.35	371.476	367.339	509.336	363.534	53.4615	32.676	50.7198	62.7198	-0.45535	-0.471505	-0.486526	0.00740317	0.0125157	0.00569497
CG11659	chr3R	0	0	0	0	2.9877	0	0	0	0	0.767587	0.959954	9.55374	0	0.995899	0	3.76043	0	1.72495	0	5.01808	#DIV/0!	#DIV/0!	#DIV/0!	NA	NA	0.144112
CG11663	chrX	0	0	0	0	0	0	0	0	0	0	0	0	0	0	0	0	0	0	0	0	#DIV/0!	#DIV/0!	#DIV/0!	NA	NA	NA
CG11664	chrX	0	0	0	0	0	0	0	1.01088	0	0	0	0	0	0	0.336961	0	0	0	0.583634	0	#NUM!	#NUM!	#NUM!	NA	NA	NA
CG11666	chrX	0	0	0	0	0	0	0	0	0	0	0	0	0	0	0	0	0	0	0	0	#DIV/0!	#DIV/0!	#DIV/0!	NA	NA	NA
CG11668	chr3R	0	0.794877	0	1.06636	0	1.00549	0	3.03265	0	0	0	1.06153	0.264959	0.690614	1.01088	0.353842	0.458922	0.598863	1.7509	0.612873	-1.93178	-0.549664	-1.51444	NA	NA	NA
CG11670	chr3R	0	2.38463	2.14297	3.19907	2.9877	2.01097	2.37612	4.04353	5.63622	2.30276	0	4.24611	1.5092	2.73258	4.01862	2.18296	1.31258	0.633802	1.63019	2.12559	-1.41292	-0.556438	-0.880419	0.353233	0.741363	0.544578
CG11672	chr3R	0	0	0	0	0	0	0	0	0	0	0	0	0	0	0	0	0	0	0	0	#DIV/0!	#DIV/0!	#DIV/0!	NA	NA	NA
CG11674	chrX	12665	14132.9	11454.2	9183.46	9779.73	9857.8	11610.9	10133.1	12419.4	9664.68	9202.12	9674.76	12750.7	9606.99	11387.8	9513.85	1341.43	368.866	1159.37	270.015	0.163083	-0.245333	-0.259388	0.143314	0.040668	0.0179922
CG11679	chrX	1117.46	1274.19	1225.78	1088.75	1197.07	1141.23	1066.88	1116.02	1194.88	1245.03	1294.02	1273.83	1205.81	1142.35	1125.92	1270.96	80.2483	54.1694	64.5721	24.6226	0.0988916	0.0208946	0.174808	0.33469	0.9103	0.0840808
CG11686	chr3R	273.593	321.13	244.298	203.674	266.901	197.076	236.424	177.915	185.995	223.368	193.911	216.551	279.674	222.55	200.112	211.277	38.7753	38.5504	31.7061	15.4206	0.482941	0.153326	0.0783287	0.0112152	0.583256	0.766977
CG11693	chr3R	0	0	0	0	0	0	0	0	0	0	0	0	0	0	0	0	0	0	0	0	#DIV/0!	#DIV/0!	#DIV/0!	NA	NA	NA
CG11694	chr3R	0	0	0	0	0	0	0	0	0	0	0	0	0	0	0	0	0	0	0	0	#DIV/0!	#DIV/0!	#DIV/0!	NA	NA	NA
CG11695	chrX	647.62	629.542	635.389	525.713	559.695	493.694	523.935	540.823	562.682	650.913	699.807	667.7	637.517	526.368	542.48	672.807	9.22461	33.0054	19.4267	24.8434	0.232895	-0.0434988	0.310623	0.0237991	0.794651	0.0021899
CG11696	chrX	1519.19	1517.42	1525.79	1386.26	1515.76	1517.28	1310.43	1496.11	1457.9	1609.63	1730.8	1608.21	1520.8	1473.1	1421.48	1649.55	4.4116	75.2076	98.0497	70.3689	0.0974385	0.0514621	0.214676	0.321703	0.71342	0.0183966
CG11698	chr3R	0	0	0	0	0	1.00549	0	0	0	0	0	0	0	0.335162	0	0	0	0.580518	0	0	#DIV/0!	#DIV/0!	#DIV/0!	NA	NA	NA
CG11699	chrX	1611.55	1598.5	1480.79	895.739	953.076	830.532	1090.64	908.784	904.613	999.398	942.675	977.666	1563.61	893.116	968.012	973.246	72.0215	61.3136	106.219	28.6185	0.691784	-0.116178	0.00777975	2.56079e-12	0.446151	0.953564
CG11700	chrX	40.4041	43.7182	43.9308	27.7253	33.8606	35.1921	10.6926	13.1415	15.9693	42.2173	44.1579	41.3996	42.6844	32.2593	13.2678	42.5916	1.97764	3.98263	2.64063	1.41676	1.68578	1.28179	1.68264	9.66705e-06	0.00471616	1.13628e-05
CG11703	chr3R	0	0.794877	0	0	0	1.00549	0	0	0.939369	0.767587	0	1.06153	0.264959	0.335162	0.313123	0.609705	0.458922	0.580518	0.542345	0.548092	-0.240961	0.0981305	0.96138	NA	NA	NA
CG11710	chrX	1433.77	1649.37	1413.29	1477.97	1412.19	1249.82	1575.37	1304.04	1389.33	1363.23	1281.54	1554.08	1498.81	1379.99	1422.91	1399.62	130.792	117.432	138.748	139.863	0.0749691	-0.0441868	-0.0238152	0.603769	0.841487	0.904734
CG11714	chr3L	0	0	0	0	0	0	0	0	0	0	0	0	0	0	0	0	0	0	0	0	#DIV/0!	#DIV/0!	#DIV/0!	NA	NA	NA
CG1172	chr3R	2582.4	2295.6	2581.2	2886.63	2930.93	2931	2967.78	3274.25	2997.53	2620.54	2702.27	2556.16	2486.4	2916.18	3079.85	2626.32	165.237	25.5986	169.01	73.2286	-0.308801	-0.0787791	-0.229817	6.88384e-05	0.484309	0.00495942
CG11722	chr3R	579.51	793.287	585.03	547.041	504.921	462.524	674.819	460.963	554.228	580.295	643.169	596.578	652.609	504.829	563.336	606.681	121.862	42.2583	107.219	32.6318	0.212222	-0.158203	0.106941	0.254052	0.53571	0.640342
CG11723	chr2L	1355.27	1286.11	1164.7	1233.77	1202.05	1204.57	1461.32	1347.51	1273.78	1385.49	1472.57	1286.57	1268.69	1213.47	1360.87	1381.54	96.4697	17.6323	94.4766	93.0625	-0.101184	-0.165395	0.021754	0.372479	0.179741	0.877718
CG11726	chr3L	0	0	0	0	0	0	0	0	0	0	0	0	0	0	0	0	0	0	0	0	#DIV/0!	#DIV/0!	#DIV/0!	NA	NA	NA
CG11737	chr3R	1938.24	1814.7	2019.75	2209.49	2144.17	2043.15	1950.8	2279.54	2023.4	2165.36	2189.66	2011.59	1924.23	2132.27	2084.58	2122.2	103.236	83.8058	172.7	96.5583	-0.115475	0.0326336	0.0258065	0.24721	0.842367	0.854126
CG11741	chr3R	3.46321	0.794877	1.07148	3.19907	0	3.01646	4.75224	5.05442	1.87874	0.767587	1.91991	0	1.77652	2.07184	3.89513	0.895832	1.46724	1.79659	1.75277	0.966358	-1.13262	-0.910758	-2.12037	0.409599	0.599773	0.241498
CG11752	chrX	1431.46	1453.83	1384.36	1220.98	1160.22	1049.73	1272.41	1169.59	1200.51	1243.49	1174.98	1346.02	1423.22	1143.64	1214.17	1254.83	35.4629	86.8199	52.7542	86.0781	0.229179	-0.0863375	0.047518	0.0168505	0.536232	0.722101
CG11753	chr3R	711.112	794.877	743.609	736.852	674.224	682.726	668.878	611.584	597.439	657.054	687.327	580.655	749.866	697.934	625.967	641.679	42.2315	33.9711	37.8293	54.973	0.260546	0.157003	0.0357644	0.0181166	0.26501	0.812885
[truncated: 15,138 more rows]
