# Supplementary material
Source: HighWire-hosted journal article supplement (doi:10.1101/rna.080311.124)
Supplement: Supplemental_File_S5.xlsx [file Supplemental_File_S5.xlsx]

## Sheet: Sheet1
Accession	Description	Abundance Ratio: (Homo) / (Het)	Abundance Ratio: (Rescue) / (Het)	Abundance Ratio: (Homo) / (Rescue)	Abundance Ratio: (Het) / (WT)	Abundance Ratio: (Homo) / (WT)	Abundance Ratio: (Rescue) / (WT)	Abundance Ratio P-Value: (Homo) / (Het)	Abundance Ratio P-Value: (Rescue) / (Het)	Abundance Ratio P-Value: (Homo) / (Rescue)	Abundance Ratio P-Value: (Het) / (WT)	Abundance Ratio P-Value: (Homo) / (WT)	Abundance Ratio P-Value: (Rescue) / (WT)	Abundances (Grouped): Het	Abundances (Grouped): Homo	Abundances (Grouped): Rescue	Abundances (Grouped): WT	Abundances (Grouped) CV [%]: Het	Abundances (Grouped) CV [%]: Homo	Abundances (Grouped) CV [%]: Rescue	Abundances (Grouped) CV [%]: WT	# Protein Groups	# Peptides	# PSMs	# Unique Peptides	Coverage [%]	MW [kDa]	calc. pI	Exp. q-value: Combined	Sum PEP Score	Abundances (Normalized): F2: 126, Sample, Het, 2	Abundances (Normalized): F2: 128N, Sample, Het, 1	Abundances (Normalized): F2: 128C, Sample, Het, 5	Abundances (Normalized): F2: 132C, Sample, Het, 4	Abundances (Normalized): F2: 129C, Sample, Homo, 1	Abundances (Normalized): F2: 130N, Sample, Homo, 2	Abundances (Normalized): F2: 131N, Sample, Homo, 3	Abundances (Normalized): F2: 132N, Sample, Homo, 5	Abundances (Normalized): F2: 133N, Sample, Homo, 4	Abundances (Normalized): F2: 131C, Sample, Rescue, 2	Abundances (Normalized): F2: 133C, Sample, Rescue, 3	Abundances (Normalized): F2: 134N, Sample, Rescue, 4	Abundances (Normalized): F2: 134C, Sample, Rescue, 1	Abundances (Normalized): F2: 127N, Sample, WT, 1	Abundances (Normalized): F2: 129N, Sample, WT, 4	Abundances (Normalized): F2: 130C, Sample, WT, 3	Abundances (Normalized): F2: 135N, Sample, WT, 2	Abundance: F2: 126, Sample, Het, 2	Abundance: F2: 128N, Sample, Het, 1
Q9VBY5	Zinc finger protein 830 OS=Drosophila melanogaster OX=7227 GN=Dmel\CG11839 PE=1 SV=3	0.339	1.128	0.301	0.905	0.307	1.021	4.23395e-12	0.0129178	4.17355e-12	0.110855	4.18876e-12	0.635343	795.7	270.1	897.9	879.5	4.52	5.49	2.17	4.37	1	8	18	8	36	29	8.43	0	35.61	771.1	782.4	852.8	809.3	303.2	267	267.3	270.1	277.8	889.2	924.2	880.1	906.8	812.6	879.5	899.4	879.4	707.4	741.3
Q9VYR0	LSM12 homolog A OS=Drosophila melanogaster OX=7227 GN=Lsm12a PE=1 SV=2	0.26	1.105	0.236	0.935	0.243	1.033	4.96114e-12	0.225606	4.48186e-12	0.527577	4.57179e-12	0.915224	1494.5	389.2	1651.5	1598.4	2.78	12.12	1.53	2.06	1	4	11	4	23	23.7	5.68	0	22.401	1541.4	1471.1	1518.3	1451.1	351.5	335	421.7	448.1	389.2	1668.5	1628.6	1680.2	1634.7	1644.4	1564.1	1596.7	1600	1414	1393.9
Q9VH95	Prostaglandin E synthase 3 homolog OS=Drosophila melanogaster OX=7227 GN=p23 PE=1 SV=1	0.756	1.069	0.707	0.926	0.699	0.989	1.48769e-11	0.000236271	4.47264e-12	8.51505e-05	4.41247e-12	0.913538	3231.6	2442.1	3453.2	3491.4	1.38	1.96	0.85	2.17	1	6	38	6	38	20.7	4.6	0	66.983	3249.5	3251.7	3156.3	3213.8	2411.3	2346.9	2469.1	2442.1	2447.5	3494.4	3469.5	3431.4	3437	3398.7	3561.2	3535.4	3447.9	2980.9	3081.1
Q9VWH4	Probable isocitrate dehydrogenase [NAD] subunit alpha, mitochondrial OS=Drosophila melanogaster OX=7227 GN=Idh3a PE=2 SV=1	0.829	1.037	0.799	0.965	0.8	1.001	1.65061e-11	0.00321511	4.81193e-12	0.0031865	4.81026e-12	1	10391.7	8616	10780.4	10769.9	1.23	1.3	0.99	0.72	1	18	78	17	54	40.8	7.36	0	121.26	10570.5	10458.8	10325	10290.7	8616	8599.2	8591.9	8736.4	8851.9	10891.5	10661	10842.5	10718.7	10714.7	10864.3	10710.4	10825.3	9696.9	9909.9
A1ZB71	Glutathione S transferase E6 OS=Drosophila melanogaster OX=7227 GN=GstE6 PE=1 SV=1	1.62	1.804	0.898	0.579	0.938	1.045	1.79974e-11	5.01743e-12	0.000279919	6.69698e-12	0.00761633	0.31391	1866.4	3022.8	3367.5	3222.4	2.94	3.74	2.25	1.38	1	12	37	11	50	25	6.23	0	57.94	1852.2	1880.8	1834	1959.3	3022.8	3049.9	2901.2	2840.7	3112.4	3376.6	3222.7	3379.9	3358.4	3194.7	3255.8	3164.1	3250.3	1699.1	1782
Q7K2E1	LD05247p OS=Drosophila melanogaster OX=7227 GN=Dmel\CG8839 PE=1 SV=1	1.384	1.073	1.29	1.021	1.412	1.095	2.432e-11	0.000444924	8.34632e-10	0.589578	1.22254e-11	5.88535e-05	1542.8	2134.5	1654.7	1511.5	1.35	2.68	1.58	1.79	1	14	29	14	30	58.2	7.75	0	71.957	1556.5	1558.8	1529.2	1516.4	2173.3	2039.6	2163.6	2081.7	2134.5	1656	1653.3	1705.6	1650.2	1547.2	1512.7	1481.1	1510.3	1427.9	1477
A1ZBD9	FI23731p1 OS=Drosophila melanogaster OX=7227 GN=MFS15 PE=2 SV=1	0.398	0.484	0.821	1.805	0.717	0.873	3.51785e-11	8.55573e-10	0.00407407	1.05493e-08	1.3879e-05	0.0222821	253.2	100.7	122.6	140.3	5.97	5.99	5.39	4.75	1	2	2	2	3	54.8	8.29	0	7.08	253	260.5	226.8	253.5	106.8	100.7	98	113.2	100.2	119.9	129	113.9	125.3	136.2	145.3	144.6	131.7	232.1	246.8
Q03427	Lamin-C OS=Drosophila melanogaster OX=7227 GN=LamC PE=1 SV=2	1.593	0.963	1.654	1.033	1.646	0.995	6.39729e-11	0.343082	2.20236e-11	0.646145	3.05997e-11	0.943299	8033.4	12801.2	7738.1	7778.4	3.03	1.84	4.79	2.36	1	41	101	40	65	69.8	6.84	0	224.869	8201.1	8091.7	7975.5	7642.5	13028.7	12915.9	12580.5	12460.1	12801.2	7176.6	7767.3	7709	8059.9	7983.1	7772.6	7535	7784.2	7523.3	7667
Q9VL70	HL08109p OS=Drosophila melanogaster OX=7227 GN=yip2 PE=1 SV=1	1.596	1.33	1.2	0.692	1.105	0.921	1.47803e-10	9.1341e-08	1.25182e-05	5.13344e-09	0.00261997	0.029952	5561	8876.5	7398.1	8036.6	5.27	2.74	1.39	2.7	1	16	69	16	52	41.6	8.51	0	125.908	5327.5	5316.7	5854.4	5804.8	8592.7	9092.5	9036.4	8575.2	8876.5	7413.5	7290.6	7539.2	7382.7	7690.7	8179.2	8107.1	7966.6	4887.2	5037.7
Q9VAY2	Heat shock protein 83 OS=Drosophila melanogaster OX=7227 GN=Gp93 PE=1 SV=1	1.196	1.002	1.194	1.017	1.216	1.018	1.66157e-10	0.999307	1.79534e-10	0.412077	6.03062e-11	0.351791	18426	22033.2	18455	18123.3	0.83	1.54	0.99	1.46	1	45	178	43	56	90.2	5.02	0	266.414	18301.6	18331.8	18520.6	18622.7	21806.1	22033.2	22411.7	22140.8	21519.8	18686.4	18261.9	18526.1	18384.2	17952	18530.9	18248.2	17999.3	16789.1	17369.6
A1Z6L9	FI21274p1 OS=Drosophila melanogaster OX=7227 GN=Trap1 PE=1 SV=1	0.739	0.864	0.856	0.957	0.707	0.826	2.18783e-10	2.69107e-06	5.21665e-07	0.149767	5.11982e-11	2.00125e-07	9624.7	7115.9	8311.1	10061.9	1.99	2.2	2.44	2.14	1	34	113	33	53	77.9	7.59	0	196.346	9810.8	9769.3	9438.7	9482.2	6963.9	7081.4	7115.9	7386.5	7201.4	8632.6	8152.2	8274.2	8348.1	9658.2	10049.1	10117.7	10074.8	9000	9256.6
Q8IPJ4	Sodium/hydrogen exchanger OS=Drosophila melanogaster OX=7227 GN=Nhe3 PE=3 SV=2	0.25	0.994	0.251	0.907	0.226	0.902	2.24733e-10	0.999958	2.18004e-10	0.488682	8.93445e-11	0.515788	275.9	68.8	274.2	304.1	2.94	15.97	4.35	7.82	1	5	10	5	10	78.4	6.48	0	22.563	283.3	268.1	269.5	282.4	82.8	66.6	87.8	68.8	59.8	268.4	266.4	292.5	280.1	337	301.5	278.9	306.7	259.8	254.1
Q9VBS0	CHK domain ov2 OS=Drosophila melanogaster OX=7227 GN=CHKov2 PE=2 SV=2	1.648	1.111	1.483	0.946	1.558	1.051	2.30879e-10	0.00686659	3.72613e-09	0.237654	8.37352e-10	0.22772	323.3	532.7	359.2	341.9	2.21	4.21	4.06	4.21	1	8	10	8	17	47.9	5.52	0	28.904	309.9	324.7	324.9	321.8	532.7	511.5	571.5	538.7	523.6	337.7	372.7	357.9	360.5	350.2	318.9	336.2	347.7	284.3	307.7
Q9VU15	LD47455p OS=Drosophila melanogaster OX=7227 GN=Sf3a2 PE=1 SV=1	0.772	1.006	0.767	1.055	0.814	1.062	2.60346e-10	0.949874	1.86103e-10	0.00615972	4.57566e-09	0.0023726	1113.4	859.5	1120.6	1055.4	2.4	2.12	1.81	0.96	1	7	15	7	28	30.3	9.64	0	29.286	1090.7	1154.9	1115.5	1111.4	863.3	856.5	859.5	859.1	900.3	1108.2	1116	1125.2	1154.7	1057.1	1049.3	1053.7	1072.7	1000.6	1094.3
Q9VMU6	LD31822p OS=Drosophila melanogaster OX=7227 GN=Nepl3 PE=1 SV=2	1.638	1.021	1.605	1.655	2.71	1.689	2.76944e-10	0.952709	3.85277e-10	2.39135e-10	4.16756e-12	1.75074e-10	590.1	966.5	602.2	356.6	3.42	1.07	2.81	6.13	1	10	13	10	16	73.1	7.2	0	44.187	571.7	594.2	620	586	965.1	983.5	961.6	966.5	982.6	579.3	602.3	602.1	620.6	365.6	347.9	320.7	366.7	524.5	563
Q7JYX5	Vesicle-associated membrane protein 7 OS=Drosophila melanogaster OX=7227 GN=Vamp7 PE=1 SV=1	1.447	1.206	1.2	0.813	1.176	0.98	3.045e-10	1.64204e-06	1.60973e-06	8.25961e-07	3.43899e-06	0.934194	1338.6	1937.1	1614.2	1646.7	1.25	1.48	1.98	5.04	1	6	14	6	23	24.9	8.53	0	25.535	1342.5	1359.4	1334.8	1318.9	1903.3	1937.1	1951.1	1915.3	1975.4	1659.7	1607.3	1621.2	1583.3	1719.8	1604.6	1538.4	1689.8	1231.5	1288
A0A0B4K6V8	Alpha-Esterase-5, isoform B OS=Drosophila melanogaster OX=7227 GN=alpha-Est5 PE=1 SV=1	0.748	1.221	0.613	0.98	0.734	1.197	3.42206e-10	3.54611e-08	4.32632e-12	0.609387	1.55436e-10	1.1794e-07	1308.6	979.5	1597.7	1335.2	2.81	2.33	1.78	1.27	1	18	32	17	35	61.4	6.19	0	84.12	1301.1	1316.2	1346	1257.9	979.5	971.8	983.8	1027.8	974.3	1624	1600.5	1555.6	1594.9	1305.2	1343.9	1335.7	1334.7	1193.6	1247.1
Q9VSH0	Cyclic GMP-AMP synthase-like protein OS=Drosophila melanogaster OX=7227 GN=CG7194 PE=1 SV=1	0.567	0.633	0.895	0.966	0.547	0.612	3.42421e-10	7.40012e-09	0.0140273	0.758167	1.83201e-10	3.36954e-09	1719.2	974.3	1088.6	1779.8	6	2.54	5.4	2.88	1	7	15	7	20	40.3	9.1	0	38.595	1824.5	1798.1	1623.8	1643.8	974.3	951.6	990.5	1006.4	949.1	1151.8	1080.4	1009.8	1096.9	1829.6	1706.9	1788.7	1771.1	1673.7	1703.8
Q9VCR9	RH48101p OS=Drosophila melanogaster OX=7227 GN=Dmel\CG17121 PE=1 SV=1	1.631	1.858	0.878	1.18	1.925	2.192	3.57177e-10	4.20233e-11	0.00169686	0.00189201	1.86995e-11	5.75973e-12	799.1	1303.6	1484.4	677.1	5.25	2.65	3.3	4.35	1	10	14	10	30	39.4	9.1	0	34.654	796.7	820.5	801.5	726.3	1335.1	1303.6	1287	1270.8	1355.8	1432.3	1488.5	1480.3	1551.7	732.9	680.5	667.4	673.8	730.9	777.5
Q9VBU2	non-specific serine/threonine protein kinase OS=Drosophila melanogaster OX=7227 GN=RIOK2 PE=3 SV=1	0.801	0.968	0.827	0.964	0.772	0.933	3.6745e-10	0.0517336	2.758e-09	0.0487084	5.67763e-11	0.000283749	2034.6	1629.3	1970.2	2111.2	1.05	2.36	0.89	1.59	1	11	19	11	20	61.4	5.38	0	58.169	2067.7	2026.9	2019	2042.4	1629.3	1618.3	1619.8	1709.5	1663.3	1982.9	1957.7	1989	1954.3	2102	2120.4	2149.4	2069.2	1896.8	1920.5
Q7K8X7	Glutathione S transferase E9 OS=Drosophila melanogaster OX=7227 GN=GstE9 PE=1 SV=1	2.031	1.023	1.985	0.49	0.995	0.501	4.74639e-10	0.999998	4.79899e-10	6.96838e-10	0.98243	7.04363e-10	1050	2132.1	1074.3	2143.3	5.51	6.87	3.62	5.58	1	8	20	8	44	24.9	7.8	0	42.35	1032.2	1043.4	1160.7	1056.6	2132.1	2063.8	2151.1	2031.3	2407.4	1087.5	1061.3	1026.5	1117.9	2358.4	2181.9	2094.6	2105.3	946.9	988.7
A0A0B4K6F9	Extended synaptotagmin-like protein 2, isoform C OS=Drosophila melanogaster OX=7227 GN=Esyt2 PE=1 SV=1	2.016	1.215	1.66	1.037	2.09	1.259	5.07817e-10	0.00100357	2.97683e-08	0.736508	2.63757e-10	0.000182842	1869.1	3767.5	2270.2	1803	3.57	6.65	4.22	5.86	1	21	38	21	31	94.8	6.15	0	103.654	1838.5	1931.8	1900.2	1782	3954.4	3314	3605.6	3767.5	3819.2	2164	2334.6	2360.2	2207.6	1900.5	1850.6	1662.8	1756.6	1686.5	1830.4
P20232	Transcription elongation factor S-II OS=Drosophila melanogaster OX=7227 GN=TfIIS PE=2 SV=1	0.699	0.864	0.81	0.897	0.627	0.774	6.23424e-10	3.75489e-05	3.6003e-07	0.000678986	2.18048e-11	6.77176e-08	3523.8	2463.5	3042.9	3930.3	1.19	4.37	0.99	2.58	1	13	53	11	48	34.3	9.06	0	94.527	3545.7	3520.4	3450.7	3527.3	2423.3	2342.8	2536.2	2463.5	2626.2	3007.5	3031.4	3054.5	3077.3	3969	3994.7	3891.9	3769.8	3252.7	3335.6
Q7K0B6	Glutathione S transferase T1 OS=Drosophila melanogaster OX=7227 GN=GstT1 PE=1 SV=1	1.475	1.312	1.124	0.787	1.161	1.032	6.41657e-10	8.60679e-08	0.000550927	4.55514e-07	3.85941e-05	0.407817	4216.9	6219.1	5531.2	5357.9	4.4	1.03	1.84	3.97	1	17	41	17	69	26.6	8.97	0	85.147	4110.2	4185	4539.8	4249.1	6163.5	6254.4	6093.4	6219.1	6223.9	5433.2	5526.8	5680.5	5535.5	5120.7	5460.3	5257.3	5600.6	3770.5	3965.3
X2JEB8	Dual specificity protein phosphatase OS=Drosophila melanogaster OX=7227 GN=MKP-like PE=1 SV=1	1.331	1.016	1.31	0.982	1.306	0.997	7.66408e-10	0.757616	1.52042e-09	0.794815	1.44581e-09	0.999871	400.4	532.8	406.6	407.9	1.79	3.02	2.09	2.13	1	4	4	4	16	26.8	9.06	0	10.843	408.9	397.5	403.4	392.4	547.7	516.1	521.3	553.4	532.8	400.2	399.7	413.2	415.9	416.1	406.1	395.3	409.6	375.1	376.6
Q9VV43	Tubulin polymerization-promoting protein homolog OS=Drosophila melanogaster OX=7227 GN=ringer PE=1 SV=1	2.278	0.776	2.935	1.236	2.816	0.96	8.25556e-10	0.00193594	4.05076e-11	0.00781371	6.59933e-11	0.863325	1523.5	3470.9	1182.6	1232.4	3.33	7.63	6.3	8.44	1	9	14	9	42	20.6	9.2	0	32.552	1448.3	1543.9	1561.8	1503.4	3713.2	3069.8	3275.8	3626.5	3470.9	1178.5	1186.6	1150.2	1320.8	1393.7	1285	1181.9	1164.4	1328.6	1462.9
O46106	Splicing factor 3A subunit 3 OS=Drosophila melanogaster OX=7227 GN=noi PE=1 SV=1	0.715	0.995	0.719	1.032	0.738	1.027	8.79779e-10	0.844407	1.55927e-09	0.361846	3.04093e-09	0.814167	1864.5	1334	1856.1	1807	2.34	3.91	2.1	1.91	1	11	25	11	26	58.4	5.62	0	65.768	1873.1	1930.5	1856.1	1826.3	1334	1290.9	1320.1	1430.5	1337.6	1785	1849.8	1869.3	1862.4	1795.2	1772.5	1819	1853.5	1718.3	1829.2
Q9VI25	Neurochondrin homolog OS=Drosophila melanogaster OX=7227 GN=Neurochondrin PE=2 SV=1	1.778	0.997	1.783	1.016	1.806	1.013	8.81071e-10	1	8.77003e-10	0.979748	6.81422e-10	0.980764	1622.2	2884.3	1617.9	1597	2.44	5.1	3.2	7.09	1	17	32	17	31	81.6	5.95	0	94.491	1652.5	1634.6	1609.9	1561.7	2889	2758.9	2884.3	2753.8	3115.5	1551.1	1671.1	1637.3	1598.7	1734.2	1600.8	1457	1593.2	1515.9	1548.8
Q9VW26	Ornithine aminotransferase, mitochondrial OS=Drosophila melanogaster OX=7227 GN=Oat PE=2 SV=1	0.426	0.578	0.737	1.307	0.557	0.755	9.04776e-10	2.93382e-07	0.000169575	0.000292665	1.53474e-07	0.000827439	10080.6	4293.7	5825.1	7714.3	5.17	6.31	2.89	10.76	1	19	69	19	46	47.3	7.05	0	124.282	10742.2	10203	9959.7	9486.8	4293.7	4161.8	4535.1	4865.5	4284.3	5757	6135.7	5808.8	5841.6	6631.4	8401.8	8177.3	7277.6	9854.4	9667.4
Q9VSW7	LD21662p OS=Drosophila melanogaster OX=7227 GN=anon-WO0172774.118 PE=1 SV=1	0.731	1.05	0.697	0.956	0.699	1.004	9.54947e-10	0.0652791	1.58927e-10	0.0663642	1.59873e-10	1	1055.8	772.1	1108.3	1103.8	1.5	3.68	2.05	2.18	1	8	13	8	21	42.8	9.25	0	29.879	1064.7	1070.2	1035.9	1047	772.1	744.8	747.1	805.8	799.8	1101.9	1114.8	1084.4	1138.4	1141	1116.7	1091.1	1090	976.7	1014.1
Q8MKW7	Ribonuclease Z, mitochondrial OS=Drosophila melanogaster OX=7227 GN=RNaseZ PE=2 SV=2	0.769	0.887	0.866	0.9	0.691	0.798	1.02294e-09	3.81054e-05	8.46693e-07	3.38876e-05	1.17999e-11	1.19385e-08	1672.6	1285.5	1483.6	1859.1	2.84	2.83	0.94	0.84	1	14	29	14	20	85.4	6.99	0	74.784	1685.9	1710.9	1600.7	1659.4	1323.7	1264.2	1238.7	1319.9	1285.5	1482.6	1483.4	1483.8	1511.3	1879	1841.7	1854.5	1863.8	1546.6	1621.1
Q7K0F7	Carbonyl reductase, isoform A OS=Drosophila melanogaster OX=7227 GN=Dmel\CG11200 PE=1 SV=1	0.608	0.795	0.765	0.908	0.552	0.721	1.09317e-09	9.25156e-06	3.44203e-06	0.0209178	1.20609e-10	1.6919e-07	2347.2	1426.7	1865.3	2585.4	1.94	6.84	2.16	2.04	1	10	23	10	35	39.6	9.16	0	51.473	2377.6	2400.4	2306.7	2317.2	1415.8	1426.7	1463.8	1620.2	1354.8	1800.7	1860.7	1895.6	1869.9	2559	2660.2	2611.9	2544.4	2181.1	2274.4
Q7KVY7	Syntaxin-4 OS=Drosophila melanogaster OX=7227 GN=Syx4 PE=2 SV=1	1.739	0.905	1.922	1.092	1.899	0.988	1.15319e-09	0.0333721	1.49004e-10	0.0694312	1.93187e-10	0.975644	350.3	609.3	317	320.9	1.69	3.78	6.7	4.8	1	4	6	4	15	38.5	7.02	0	19.181	359.2	350.7	344.9	350	609.3	605.3	561.3	617.3	612.8	295.6	303.6	331	339.9	326	303.8	316	340.3	329.5	332.3
Q9VMQ6	Cytochrome c oxidase copper chaperone COX11 OS=Drosophila melanogaster OX=7227 GN=Cox11 PE=2 SV=2	0.133	0.167	0.799	7.601	1.012	1.267	1.19172e-09	8.57336e-09	0.304606	2.08248e-09	0.999741	0.308935	164.8	21.9	27.5	21.7	6.44	27.87	9.73	15.65	1	3	5	3	10	27.3	7.71	0	7.68	171.5	175.7	153.3	158.4	17.3	19.4	21.9	23.9	34.1	27.6	31.8	25.3	27.3	19.5	21.1	27.7	22.2	157.3	166.5
Q9W2J3	UDP-glucuronosyltransferase OS=Drosophila melanogaster OX=7227 GN=Ugt49C1 PE=2 SV=3	2.755	1.459	1.888	0.848	2.335	1.237	1.38127e-09	0.00017001	4.40386e-07	0.0549089	1.47256e-08	0.0257781	148	407.8	216	174.6	7.86	13.15	3.56	5.97	1	3	4	3	6	60.6	7.46	0	10.558	133	160.9	150.7	145.4	386.4	345	482.1	455.8	407.8	228.3	216.6	209.9	215.4	174.4	191.5	166.3	174.8	122	152.5
A8DYI6	Prohibitin OS=Drosophila melanogaster OX=7227 GN=Phb2 PE=1 SV=1	0.84	0.985	0.853	0.979	0.822	0.964	1.45461e-09	0.823853	2.77565e-09	0.146056	3.13751e-10	0.0326078	17568.5	14751.3	17302.6	17952.7	1.25	1.88	0.91	1.7	1	23	100	23	74	37.3	9.54	0	136.227	17522.7	17614.4	17616.2	17155	14549.5	14879.8	14751.3	14237.5	14900.2	17476.3	17184.2	17421.8	17176	18248.1	17872.4	18033.3	17524.7	16074.6	16689.9
A1Z6N2	FI02861p OS=Drosophila melanogaster OX=7227 GN=Tdc1 PE=2 SV=1	1.639	1.133	1.446	0.929	1.523	1.053	1.50681e-09	0.00620705	5.2575e-08	0.096219	1.22508e-08	0.453066	483.2	792	547.6	520.2	2.75	3.37	6.19	5.04	1	11	14	11	23	65.6	6.87	0	46.953	469.7	488.1	500.7	478.2	787.1	782	847.9	792	814.2	514.4	560.3	593.6	535.3	498.4	561.1	524.8	515.7	430.9	462.5
Q7JVI6	Glutathione S transferase E13, isoform A OS=Drosophila melanogaster OX=7227 GN=GstE13 PE=1 SV=1	0.134	0.138	0.975	0.551	0.074	0.076	1.51364e-09	2.96391e-09	0.999893	0.0014713	6.34838e-11	1.30883e-10	858.5	115.4	118.4	1557.4	1.95	26.84	16.35	5.78	1	4	11	4	19	25.8	6.61	0	25.527	882.5	855.2	861.8	842.3	115.4	74.8	117.3	163.1	113.1	89.8	135.2	117.6	119.1	1721.6	1571.1	1543.8	1516.2	809.6	810.3
Q9VX84	FI17861p1 OS=Drosophila melanogaster OX=7227 GN=Dmel\CG16700 PE=2 SV=1	2.694	0.994	2.711	1.338	3.605	1.33	1.66516e-09	0.958749	1.16917e-09	0.00153492	7.00533e-11	0.00369198	138.3	372.5	137.4	103.3	9.63	8.87	7.82	9.16	1	5	7	5	13	50.9	6.44	0	32.087	156.7	137.8	138.7	124	372.5	347.1	436	387.4	364	133.9	144.2	141	120.4	98.2	112	91.6	108.7	143.7	130.6
P92204	Negative elongation factor E OS=Drosophila melanogaster OX=7227 GN=Nelf-E PE=1 SV=1	0.642	0.772	0.831	1.143	0.733	0.883	1.77014e-09	1.24851e-06	9.64167e-05	0.000858065	2.14174e-07	0.00256943	2326.3	1493	1796.6	2035.6	6.19	4.33	1	2.72	1	8	13	8	32	31.8	9.47	0	29.715	2587.8	2316.7	2335.9	2254.1	1473.4	1449.6	1493	1618.3	1519.7	1779.8	1799.7	1793.5	1823	2010.2	2061.2	2119.9	1997.8	2373.9	2195.1
Q9VEP9	GH03554p OS=Drosophila melanogaster OX=7227 GN=Sf3a1 PE=1 SV=1	0.669	0.988	0.676	1.011	0.676	0.999	1.84438e-09	0.899464	3.12973e-09	0.97651	2.50661e-09	0.991675	6064.1	4054.1	5993.2	5997.3	3.03	3.42	0.57	5.35	1	31	63	31	44	88	6.37	0	170.616	6146.9	6317.3	5901.8	5982.3	4054.1	3986.1	3966.6	4282.7	4212.1	5998.5	6008.8	5987.8	5932.8	6184.2	5714.1	6407.9	5815.9	5638.9	5985.8
Q9W4M7	Twenty-four, isoform B OS=Drosophila melanogaster OX=7227 GN=tyf PE=1 SV=1	0.783	1.039	0.754	0.97	0.76	1.007	2.73525e-09	0.128784	5.12086e-10	0.276583	7.05899e-10	0.959624	13338.3	10450.2	13854.4	13751.8	0.92	1.48	1.27	4.08	1	54	200	54	36	199.5	6.68	0	427.16	13109.7	13335.4	13379.6	13341.1	10450.2	10532.1	10184.7	10516.7	10276.4	13963.9	13560.5	13885.8	13823	14167.3	13114.6	13348.6	14201.9	12026.3	12635.4
O46037	Vinculin OS=Drosophila melanogaster OX=7227 GN=Vinc PE=1 SV=1	1.242	0.985	1.261	1.044	1.297	1.029	2.82007e-09	0.97221	2.02718e-09	0.103721	4.8315e-10	0.208367	12281.6	15257.8	12102.1	11759.5	0.72	2.16	1.73	2.74	1	48	135	48	53	106.2	6.7	0	291.055	12250.8	12312.4	12345.4	12143.8	15593.1	14715.1	15257.8	15414.6	15182	12102.4	12052.3	12503.8	12101.7	12266.5	11605.9	11568.2	11915.1	11238.3	11666.2
Q9W0Y1	Troponin C-akin-1 protein OS=Drosophila melanogaster OX=7227 GN=Tina-1 PE=2 SV=1	0.708	1.076	0.658	0.953	0.674	1.025	2.91713e-09	0.0147223	2.47788e-10	0.119251	5.24079e-10	0.651734	3117.5	2205.7	3353.9	3272.3	4.35	3.27	1.43	2.74	1	8	24	8	63	19	7.44	0	48.712	3222.3	3227.9	3016.1	2970.1	2150.3	2205.7	2174.1	2337.4	2207.9	3360.5	3347.3	3319.8	3432.5	3244.6	3392.4	3300.4	3180.3	2956	3058.4
Q9VIH9	UPAR/Ly6 domain-containing protein CG9338 OS=Drosophila melanogaster OX=7227 GN=CG9338 PE=1 SV=1	2.38	0.97	2.453	0.85	2.024	0.825	3.11888e-09	0.999993	3.18373e-09	0.0176594	7.79452e-08	0.0185144	260	619	252.3	305.8	2.42	9.59	5.7	11.99	1	3	6	3	22	15.7	6.42	0	11.842	261.5	248.1	259.8	260.3	655.9	564.1	619	573.3	708.4	251.3	247.8	279.9	253.3	371.5	299.8	284.7	311.9	239.9	235.1
Q9VYL5	GH19726p OS=Drosophila melanogaster OX=7227 GN=Dmel\CG1824 PE=1 SV=1	0.764	0.882	0.867	1.073	0.82	0.946	3.14489e-09	5.91211e-05	4.01937e-06	0.00975169	1.10423e-07	0.0417451	1854.4	1416.7	1634.8	1727.7	2.39	3.24	2	1.3	1	20	32	20	28	83.5	7.81	0	86.564	1868.9	1840	1779.3	1876.1	1417.8	1404.3	1367.7	1493.9	1416.7	1624.5	1645	1601.5	1678.6	1696.8	1740.1	1744.8	1715.4	1714.5	1743.4
A1Z6H6	Peptidase M3A/M3B catalytic domain-containing protein OS=Drosophila melanogaster OX=7227 GN=Dmel\CG7791 PE=1 SV=1	0.87	0.933	0.932	0.983	0.855	0.917	3.28846e-09	1.25222e-05	2.00644e-05	0.385263	9.71846e-10	1.52061e-06	2617.7	2276.1	2441.4	2662.6	1.33	0.81	2.21	0.74	1	17	26	17	27	80.2	6.87	0	87.881	2675.4	2610.2	2595.2	2625.3	2261.5	2283.9	2280.8	2276.1	2239.1	2486	2458.2	2424.7	2361.4	2666.4	2696.9	2658.8	2652.5	2454.3	2473.2
P09180	Large ribosomal subunit protein uL4 OS=Drosophila melanogaster OX=7227 GN=RpL4 PE=1 SV=2	0.881	0.913	0.965	1.044	0.92	0.953	3.35853e-09	1.97558e-07	0.00851975	0.000564604	7.38293e-07	0.00022932	22546.8	19870	20584	21589.2	1.64	0.82	0.74	1.03	1	30	167	30	60	45	11.47	0	159.492	22557.5	22536.1	21941	22812.7	19829.5	19870	19841	20112.2	20171.5	20584.7	20691.6	20334	20583.3	21537.9	21720.8	21640.6	21217.2	20693.3	21353.3
Q9VE79	Heparanase OS=Drosophila melanogaster OX=7227 GN=Dmel\CG14309 PE=1 SV=2	0.675	0.868	0.778	1.168	0.788	1.013	4.17391e-09	0.00130132	5.67979e-07	0.000861743	7.54327e-07	0.994942	17261.5	11645.3	14975.4	14776	3.12	5.11	2.51	4.56	1	47	174	47	50	110.5	8.16	0	344.695	16963.1	16913.1	18053.1	17565.1	11645.3	11060.9	11676.7	11742.7	10394	14991.6	14674.8	15574.2	14959.1	14521.4	15035.1	15885.4	14374.8	15561.2	16025.4
Q9VIX4	Acyl-coenzyme A oxidase OS=Drosophila melanogaster OX=7227 GN=Dmel\CG17544 PE=1 SV=2	1.545	1.163	1.328	1.101	1.702	1.281	4.23107e-09	0.000483653	1.16656e-06	0.0123492	3.12205e-10	2.35535e-06	2056.7	3177.2	2391.9	1867.2	2.93	4.04	5.39	2.72	1	17	39	17	30	77.2	7.03	0	107.351	2093.6	2141.2	2015.5	2020.4	3196.7	3177.2	3255.3	3067.7	2935.9	2578.7	2290.7	2331.6	2453.8	1869.6	1925.6	1801.3	1864.8	1920.6	2028.8
B7YZL3	Uncharacterized protein, isoform T OS=Drosophila melanogaster OX=7227 GN=10737 PE=1 SV=1	1.455	1.032	1.41	0.949	1.381	0.979	4.26694e-09	0.591253	1.30162e-08	0.126334	3.76865e-08	0.684112	2246.9	3268.3	2317.7	2367.3	0.76	3.46	1.08	5.72	1	24	43	24	30	103.8	7.59	0	132.048	2258.1	2235.7	2264.3	2229.3	3251.6	3022.2	3268.3	3270.4	3288.5	2308.3	2327.3	2288.1	2346.3	2347.7	2564.7	2387	2236.2	2071.4	2118.4
P24156	Prohibitin 1 OS=Drosophila melanogaster OX=7227 GN=Phb1 PE=2 SV=2	0.857	1.022	0.838	0.965	0.827	0.986	4.55678e-09	0.168443	8.66403e-10	0.0166756	3.66815e-10	0.567711	9493.9	8137.2	9705.5	9841.8	0.35	1.83	0.86	1.82	1	18	95	18	84	30.4	5.73	0	139.32	9475.2	9516.2	9446	9512.6	7983.9	8135.9	8312.7	8137.2	8353.7	9596.3	9687.9	9796.6	9723	9621.8	10016.6	9936.6	9748	8692.2	9016.7
Q7PLI0	Adherens junction protein p120 OS=Drosophila melanogaster OX=7227 GN=p120ctn PE=1 SV=1	0.703	0.885	0.794	1.075	0.755	0.951	4.93928e-09	0.000776769	1.03786e-06	0.135108	4.30611e-08	0.0529983	1620.3	1138.6	1433.7	1507.6	1.56	5.41	2.17	2.42	1	15	18	15	19	86.8	6.92	0	62.996	1624.6	1633.6	1576.6	1616	1145.4	1077.9	1065.8	1218.1	1138.6	1432.8	1435.7	1372.7	1434.6	1499.1	1514.5	1577.2	1500.7	1490.3	1547.8
Q9VUL8	Peroxisomal assembly protein PEX3 OS=Drosophila melanogaster OX=7227 GN=Pex3 PE=1 SV=1	0.816	0.998	0.818	0.988	0.806	0.986	5.1707e-09	0.99995	4.95403e-09	0.655413	2.03615e-09	0.685041	4004.1	3266.6	3995.4	4050.7	1.21	2.59	1.99	1.05	1	15	27	15	36	43.7	8.5	0	62.876	4035.2	3999.2	3922.7	4008.9	3212.9	3322.9	3266.6	3413.8	3210.9	4085.6	3963.5	3901.7	4027.5	4032.6	4009.1	4106	4068.8	3701.7	3789.3
Q9W0M7	Splicing factor 3B subunit 3 OS=Drosophila melanogaster OX=7227 GN=Sf3b3 PE=1 SV=2	1.354	0.905	1.496	1.011	1.37	0.916	5.3348e-09	0.00195449	1.94928e-10	0.957236	3.52439e-09	0.00478626	6191.2	8384.3	5604.2	6121.2	0.91	4.09	3.5	1	1	40	79	40	36	136.5	5.47	0	212.797	6189.3	6226.6	6095.3	6193	8022.1	8610.4	8384.3	8718.4	7957.1	5775.2	5778.8	5438.4	5436.5	6031.1	6177.8	6110	6132.5	5677.8	5899.8
P35875	Poly [ADP-ribose] polymerase OS=Drosophila melanogaster OX=7227 GN=Parp PE=1 SV=1	0.704	0.916	0.769	1.026	0.722	0.94	5.65392e-09	0.0126514	2.0343e-07	0.394292	2.48834e-08	0.217761	4632.7	3262.8	4245	4516.1	2.17	1.58	1.22	6.23	1	33	63	33	34	113.7	8.56	0	151.267	4741.8	4640.5	4497.1	4624.8	3197.7	3318.3	3262.8	3321.6	3250.6	4248.4	4163.5	4241.6	4287.3	4677.3	4103.7	4360.4	4677.7	4349.9	4396.9
Q9VLU3	IP09231p OS=Drosophila melanogaster OX=7227 GN=Dmel\CG12560 PE=1 SV=2	0.34	0.279	1.217	0.592	0.201	0.165	6.24177e-09	4.07645e-09	0.529605	0.000155213	8.39464e-11	7.4577e-11	614.5	208.7	171.5	1038.7	5.44	16.94	7.09	2.12	1	6	11	6	26	31.6	7.11	0	26.596	598.1	599	670	630.5	199.7	138.5	208.7	219.5	216	168.1	174.9	163.5	191.7	1044.1	1057.2	1033.3	1005.6	548.7	567.5
C0HK95	Protein anoxia up-regulated OS=Drosophila melanogaster OX=7227 GN=fau PE=2 SV=1	1.601	0.872	1.837	0.882	1.411	0.768	6.89459e-09	0.00884856	4.01179e-10	0.00336885	6.05608e-07	7.786e-06	1020.2	1633	889.1	1157.1	0.79	5.25	2.24	7.34	1	6	15	5	63	14.4	9.6	0	38.449	1009.8	1018.9	1021.4	1029.3	1617.5	1508.5	1633	1740.7	1680.6	927	883.8	887	891.2	1307.7	1157.5	1107.4	1156.7	926.4	965.4
Q7PLW5	Uncharacterized protein OS=Drosophila melanogaster OX=7227 GN=Dmel\CG17169 PE=4 SV=2	0.732	0.859	0.851	1.078	0.789	0.926	7.08554e-09	0.000265466	4.07838e-06	0.0300974	1.61461e-07	0.0770495	539.7	394.9	463.8	500.7	1	4.94	2.68	2.54	1	3	5	3	32	12.8	9.99	0	17.97	534.4	537.8	541.6	547.1	395.4	382.6	394.9	401.6	353.9	464.3	488.6	463.4	462.9	498.3	485.3	516	503.1	490.3	509.6
P14318	Muscle-specific protein 20 OS=Drosophila melanogaster OX=7227 GN=Mp20 PE=2 SV=2	1.989	0.92	2.162	0.806	1.603	0.742	7.26683e-09	0.174756	1.28451e-09	0.00228	8.45558e-07	6.19127e-05	3849.3	7657.7	3541.5	4775.7	2.28	7.01	3.66	9.61	1	13	46	13	75	20.2	8.65	0	87.714	3996.6	3803.4	3882.9	3816	7503.7	6548.8	7657.7	7752.3	7829.5	3326.6	3589.7	3605.7	3494	5354.6	5009.9	4552.4	4321.9	3666.3	3603.8
P23226	205 kDa microtubule-associated protein OS=Drosophila melanogaster OX=7227 GN=Map205 PE=1 SV=2	1.555	1.657	0.938	0.976	1.517	1.617	7.52246e-09	1.28546e-09	0.0261073	0.898862	1.39889e-08	2.0723e-09	8341.4	12970.5	13824.1	8550.6	2.78	5.28	1.47	5.17	1	38	112	38	38	126.6	4.86	0	251.846	8677.6	8363.6	8319.4	8115.2	13008.1	12124	13479.4	11868.7	12970.5	14186.3	13780.5	13732	13867.9	8229.8	8966.5	8103.7	8884	7960.5	7924.6
Q7KN94	Electron transfer flavoprotein subunit alpha OS=Drosophila melanogaster OX=7227 GN=wal PE=1 SV=1	0.834	0.823	1.013	0.835	0.696	0.687	7.66294e-09	5.89035e-09	0.669205	2.65532e-08	4.84601e-12	5.00699e-12	11561.9	9640.5	9514.9	13841.8	1.84	1.94	1.28	2.28	1	17	65	17	61	34.2	8.32	0	105.739	11408.2	11425	11842.1	11700.5	9334.2	9758.7	9640.5	9785.1	9510.5	9548.3	9291.1	9548.2	9481.8	13531.3	14277.9	13933.3	13751	10465.4	10825.4
Q8IQB4	Z band alternatively spliced PDZ-motif protein 66, isoform E OS=Drosophila melanogaster OX=7227 GN=Zasp66 PE=1 SV=2	2.574	0.855	3.009	0.998	2.57	0.854	8.12857e-09	0.0661604	9.40311e-10	0.998808	9.25926e-09	0.0510161	1468.2	3779.5	1256	1470.4	8.77	12.49	2.69	10.53	1	18	33	18	53	47.6	9.42	0	77.404	1396.4	1517.3	1687.5	1420.7	4103.6	3378.9	3779.5	3487.4	4563.6	1248.9	1263.1	1201.5	1279.6	1755.8	1477.5	1391.5	1463.4	1281	1437.7
A1Z729	Uncharacterized protein OS=Drosophila melanogaster OX=7227 GN=Rdh1 PE=1 SV=1	2.507	1.092	2.296	1.594	3.998	1.741	1.00059e-08	0.53404	3.64821e-08	3.74128e-05	6.51176e-11	5.62394e-06	983.8	2466.7	1074.3	617	3.27	14.73	1.8	7.69	1	14	26	10	45	36.6	8.66	0	74.739	987.1	1022	943.5	980.4	2511	2396.3	2466.7	2974	1955.3	1060.9	1057.8	1087.9	1096.5	644.9	590.4	562.1	664.2	905.6	968.3
Q9VXT0	RE16047p OS=Drosophila melanogaster OX=7227 GN=Dmel\CG8097 PE=2 SV=1	0.61	0.707	0.863	1.057	0.645	0.747	1.00607e-08	1.83382e-06	0.00223688	0.86884	2.03532e-08	4.75018e-06	648.2	395.4	458	613.1	2.68	5.82	5.66	5.65	1	6	10	6	13	50.9	7.23	0	21.781	666.3	641.3	655.2	626.3	395.4	351.6	388.5	412.4	396.9	461	425.4	455.1	488.5	683.2	610.1	612.4	613.7	611.3	607.7
Q8SWU7	Obg-like ATPase 1 OS=Drosophila melanogaster OX=7227 GN=CG1354 PE=1 SV=1	0.782	0.952	0.821	1.033	0.808	0.984	1.03408e-08	0.108188	1.17469e-07	0.664901	3.03948e-08	0.556451	13073.6	10222.7	12450	12654.7	1.32	3.57	1.2	2.71	1	20	83	20	51	44.9	6.71	0	112.811	13125.7	13062.8	12751.6	13084.4	10269.3	10222.7	9871.5	10724.2	9822.5	12458.4	12441.7	12621.4	12255	12467.5	13203.5	12820.3	12491.2	12041	12377.2
Q7K0A0	Large ribosomal subunit protein mL42 OS=Drosophila melanogaster OX=7227 GN=mRpL42 PE=1 SV=1	1.708	1.07	1.597	0.795	1.358	0.85	1.04105e-08	0.636919	3.20696e-08	0.000103119	1.73562e-05	0.000722104	457.1	780.8	488.9	575	3.74	3.61	6.95	6.24	1	2	5	2	15	13.9	10.42	0	11.471	439.3	481.1	457.9	456.3	783	773.4	780.8	783.5	718.8	476.4	501.6	434.6	508.4	555.2	559.8	590.6	634.4	403	455.8
Q9VRY5	Ribosome maturation protein SBDS OS=Drosophila melanogaster OX=7227 GN=Sbds PE=1 SV=1	1.132	1.085	1.043	0.965	1.092	1.047	1.06385e-08	2.14844e-06	0.00196927	0.00418795	9.42116e-07	0.00116978	2968.9	3360.6	3222.6	3077.9	1.2	1.39	1.17	1.24	1	12	30	12	42	28.6	8.56	0	48.641	2980.4	2918.3	3001.2	2957.5	3384.3	3360.6	3350	3399.9	3278.8	3268.1	3229.8	3215.4	3177.1	3130.3	3037.1	3074.3	3081.5	2734.1	2765.1
Q9W0E3	GATOR complex protein Iml1 OS=Drosophila melanogaster OX=7227 GN=Iml1 PE=1 SV=2	1.383	0.977	1.415	1.049	1.451	1.025	1.09104e-08	0.53125	3.35042e-09	0.176601	1.79604e-09	0.848512	980.6	1355.9	957.9	934.4	3.28	3.5	2.47	3.11	1	17	26	17	15	176.6	7.37	0	78.959	985.6	975.5	1035.4	960.5	1375.3	1355.9	1325.3	1272	1390.8	988.2	949.7	932.6	966.2	983.2	916.6	926.6	942.3	904.2	924.3
Q0KI28	Biogenesis of lysosome-related organelles complex 1 subunit 5 OS=Drosophila melanogaster OX=7227 GN=Muted PE=1 SV=1	0.709	0.969	0.732	1.052	0.746	1.019	1.09582e-08	0.727591	2.91048e-08	0.304717	6.31949e-08	0.8606	352.9	250.3	341.8	335.4	2.34	4.92	3.13	2.3	1	5	6	5	24	18.3	5.47	0	21.502	360.4	351.2	340.8	354.6	259	250.3	236.2	266.4	241.7	332.6	335.3	355.2	348.4	327.9	336.5	346.5	334.3	330.7	332.8
Q9W1F4	THO complex subunit 5 OS=Drosophila melanogaster OX=7227 GN=thoc5 PE=1 SV=2	1.142	1.216	0.94	0.915	1.046	1.113	1.1235e-08	3.05623e-10	0.000168422	1.13765e-06	0.00603015	1.26964e-06	1913.7	2185.7	2326.2	2090.4	0.88	0.92	1.81	1.68	1	10	17	10	17	70.8	8.44	0	49.237	1923.5	1936.2	1900.7	1903.9	2185.7	2165.8	2218.4	2173.8	2188.6	2253.4	2318.9	2333.5	2348.4	2090.2	2090.5	2159.5	2085.6	1764.5	1834.6
Q7KN79	Protein LTV1 homolog OS=Drosophila melanogaster OX=7227 GN=LTV1 PE=1 SV=1	0.69	0.836	0.825	1.1	0.759	0.92	1.18406e-08	0.000115478	1.9217e-05	0.0122583	5.36054e-07	0.0728316	2513.6	1734.9	2102	2285	2.74	4.79	4.17	2.88	1	17	26	17	38	57.2	4.92	0	74.374	2614.7	2514.4	2447.1	2512.9	1745.9	1734.9	1661.9	1886.2	1711.1	2056.3	2237.5	2050.2	2148.7	2264.3	2306	2359.4	2203.7	2398.6	2382.4
Q9VKC8	FI03495p OS=Drosophila melanogaster OX=7227 GN=Tom70 PE=1 SV=2	0.722	0.877	0.823	1.053	0.76	0.923	1.20595e-08	0.000625562	4.5337e-06	0.348403	6.36864e-08	0.0134472	7337.5	5295.1	6433	6967.7	3.64	3.1	1.11	4.28	1	22	61	22	41	66.3	6.21	0	124.903	7521.8	7314.3	6900.2	7360.9	5295.1	5348.5	5172.1	5580.4	5187.4	6332.2	6425.3	6440.6	6505.2	6692.4	7139	7338.8	6800.5	6900.2	6930.4
A1ZAG1	Jetboil OS=Drosophila melanogaster OX=7227 GN=jtb PE=4 SV=1	1.664	1.665	1	1.546	2.573	2.573	1.22031e-08	2.96768e-08	0.992601	1.49697e-07	7.06168e-12	1.28882e-11	1157.9	1927.2	1927.4	749.1	3.28	6.5	4.55	5.62	1	7	14	7	27	27.2	9.14	0	39.426	1098	1147.2	1184.5	1168.7	2086	1760.6	1840.9	1973.4	1927.2	1771.5	1963.7	1939	1915.7	783.4	687.8	764.7	733.8	1007.2	1087
Q0E980	Uncharacterized protein, isoform C OS=Drosophila melanogaster OX=7227 GN=Dmel\CG8547 PE=1 SV=2	1.649	1.028	1.603	1.028	1.695	1.057	1.23133e-08	0.822341	2.77279e-08	0.998308	1.05997e-08	0.735089	986.5	1626.7	1014.5	959.9	2.1	6.42	1.14	6.95	1	17	31	17	40	68	8.54	0	78.183	980.2	992.8	1002.2	954.6	1683.8	1444.4	1626.7	1542.8	1682.5	1022.7	1006.6	1022.5	999.9	1075.6	954.4	917.7	965.4	899.2	940.7
A1Z7P1	Phosphoglucomutase 2a OS=Drosophila melanogaster OX=7227 GN=Pgm2a PE=1 SV=1	0.803	0.748	1.073	0.845	0.679	0.632	1.24486e-08	6.40023e-10	0.00115212	1.66007e-06	1.81334e-11	5.52058e-12	2143.1	1720.3	1603.1	2535.2	2.59	2.3	2.94	1.01	1	17	39	17	31	69.9	5.45	0	85.246	2236.8	2127.8	2158.4	2110.4	1719.6	1670	1733.3	1720.3	1781.3	1629.5	1636.2	1536.8	1577.1	2537.8	2532.6	2486.2	2540.4	2051.9	2016.2
A1ZB72	Glutathione S transferase E7 OS=Drosophila melanogaster OX=7227 GN=GstE7 PE=1 SV=1	1.586	1.545	1.027	0.712	1.13	1.1	1.35083e-08	4.43737e-08	0.926621	1.06388e-06	0.00992358	0.0407952	387.4	614.4	598.4	543.8	4.16	6.31	4.42	2.76	1	5	16	4	23	25.5	6.57	0	22.172	366.9	385.1	406.1	389.8	614.4	643.7	570.2	573.3	653.2	629.2	587.4	568.4	609.6	553.6	544.7	518.8	542.9	336.6	364.9
Q9VS44	Uncharacterized protein OS=Drosophila melanogaster OX=7227 GN=Dmel\CG8607 PE=1 SV=2	0.756	0.831	0.909	1.138	0.86	0.946	1.44303e-08	1.52357e-06	0.00634139	0.000185445	1.69494e-05	0.0187347	1206	911.3	1002.1	1059.6	3.07	3.12	3.59	1.06	1	7	12	7	32	30.5	6.9	0	32.239	1212.2	1199.9	1241.7	1153	888.7	880.2	911.3	918.8	952.5	1002.1	932.9	1006.4	1002.2	1054.1	1070.3	1045.3	1065.1	1112	1137
Q6IDF5	NADH dehydrogenase [ubiquinone] 1 beta subcomplex subunit 4 OS=Drosophila melanogaster OX=7227 GN=ND-B15 PE=1 SV=1	0.683	0.672	1.017	0.852	0.582	0.572	1.57986e-08	2.41813e-08	0.99351	0.000637309	2.7983e-10	4.44571e-10	1729.5	1181.2	1161.8	2030.2	3.75	3.42	2.69	5.48	1	6	11	6	53	13.1	9.82	0	23.802	1621.2	1751.1	1708.1	1762.3	1182.8	1109.1	1219.9	1169.5	1181.2	1186.2	1137.9	1136.5	1195.9	1833.7	2049.8	2010.9	2075.9	1487.3	1659.2
Q7KJA9	protein O-GlcNAc transferase OS=Drosophila melanogaster OX=7227 GN=sxc PE=1 SV=1	0.856	1.027	0.834	1.035	0.886	1.063	1.64617e-08	0.0175086	9.66651e-10	0.242633	1.17677e-07	0.000518753	2718	2327.9	2792.5	2626.9	2.62	0.65	0.55	1.48	1	23	46	23	27	118.6	7.15	0	138.431	2706.7	2745.5	2589.8	2729.4	2325.2	2348.8	2327.9	2312.5	2345.8	2817.3	2797.2	2782	2787.7	2600.2	2611.5	2642.4	2687.4	2483	2601.4
A0A6H2EDG9	Uncharacterized protein, isoform G OS=Drosophila melanogaster OX=7227 GN=Dmel\CG12065 PE=1 SV=1	1.613	1.092	1.477	1.107	1.785	1.208	1.66016e-08	0.0753197	2.58412e-07	0.213028	2.7872e-09	0.00180124	2984.1	4814.3	3258.5	2696.6	4.44	6.04	4.2	5.08	1	30	67	30	54	78.8	8	0	161.375	3063.8	3009.1	2959.3	2762.9	4960.9	4384.3	4814.3	5101.3	4583.3	3087.6	3394.7	3324.4	3193.9	2724.9	2935.5	2668.7	2619.4	2810.6	2851.1
Q8IRH1	FI19310p1 OS=Drosophila melanogaster OX=7227 GN=Psa PE=1 SV=1	0.876	1.113	0.787	0.993	0.87	1.106	1.74513e-08	2.83742e-07	1.00645e-11	0.954414	1.08856e-08	4.94708e-07	16209.6	14206	18046.2	16322.6	0.94	1.19	1.27	1.91	1	52	165	52	44	122.7	6.34	0	302.47	16321.2	16393.8	16098.8	16098	14198.6	14153.7	14206	14296.9	14576.2	18128.2	17796.1	18332.1	17964.6	16606.3	16104.1	15985.2	16544	14972.4	15533.4
P91622	[Pyruvate dehydrogenase (acetyl-transferring)] kinase, mitochondrial OS=Drosophila melanogaster OX=7227 GN=Pdk PE=2 SV=2	0.632	0.935	0.677	0.748	0.473	0.699	1.75198e-08	0.261216	1.1976e-07	1.21287e-05	5.78235e-11	1.06088e-06	780.1	493.4	729	1042.5	4.62	6.85	2.97	3.26	1	9	14	9	29	46.6	7.15	0	36.815	756.4	757.3	830.2	803.6	493.4	492.8	521.5	441	526.1	723.2	716	765.5	734.9	998.6	1030.4	1054.7	1077.9	693.9	717.6
Q9V3Z2	Serine protease 7 OS=Drosophila melanogaster OX=7227 GN=Sp7 PE=1 SV=1	1.393	0.695	2.005	0.933	1.3	0.648	1.78218e-08	1.48672e-08	4.95781e-12	0.0635226	3.13743e-07	1.63808e-09	577.7	804.8	401.5	619.2	3.36	5	1.34	3.14	1	5	9	5	18	43.1	6.62	0	21.135	551.3	584.7	570.8	596.2	769.3	844.4	804.8	766.8	852.7	404.1	406.6	394.5	398.9	624.8	640.5	594.4	613.7	505.7	554
A1Z9J8	Sulfotransferase 4, isoform A OS=Drosophila melanogaster OX=7227 GN=St4 PE=3 SV=1	0.649	0.694	0.935	1.174	0.762	0.815	1.79808e-08	5.72901e-07	0.0507047	0.00533022	1.61907e-06	0.000144203	1714.3	1112.6	1189.9	1460.4	3.01	6.24	4.57	3.38	1	14	25	14	48	40.6	6.1	0	55.875	1728.9	1735	1624	1699.8	1120.4	1112.6	1074.1	1190.8	1003	1201.3	1281.9	1155.2	1178.6	1448.7	1472.1	1553	1446.2	1586	1643.9
P10674	Fasciclin-1 OS=Drosophila melanogaster OX=7227 GN=Fas1 PE=1 SV=1	1.428	1.068	1.336	1.06	1.513	1.132	1.88564e-08	0.102635	2.46116e-07	0.267069	3.5031e-09	0.00324354	6474	9243.1	6916.7	6109	2.11	5.6	3.16	3.29	1	28	73	28	45	72.6	7.02	0	176.604	6442.1	6505.9	6547.1	6240.8	10004.1	8571.5	9243.1	9201.1	9513.5	6654.9	7040.2	7129.4	6795.3	6257.3	6284.8	5964.2	5892.1	5909.7	6164.4
A0A0B4KFE4	long-chain-fatty-acid--CoA ligase OS=Drosophila melanogaster OX=7227 GN=Acsl PE=1 SV=1	1.231	1.068	1.152	1.028	1.266	1.098	1.92517e-08	0.00615828	1.60494e-06	0.152821	2.67463e-09	0.000127094	8770.4	10795.5	9367.8	8528.4	3.25	2.05	1.38	1.16	1	26	88	26	36	81.8	8.29	0	164.008	8877.8	8664.3	9147.6	8484	10795.5	10512.4	10908.2	10886.1	10433.3	9169.1	9354.9	9380.8	9477.4	8510	8546.8	8351.4	8571.3	8144.1	8209.5
Q9VJ75	GH08340p OS=Drosophila melanogaster OX=7227 GN=Dmel\CG10413 PE=1 SV=1	1.248	1.038	1.202	1.028	1.283	1.067	2.01402e-08	0.108053	2.57157e-07	0.529755	5.78876e-09	0.00902745	1290.6	1610.3	1339.1	1255.1	2.03	2.93	2.63	2.08	1	12	23	12	14	104.2	6.62	0	66.8	1284.5	1296.7	1310.7	1249.7	1610.3	1576.4	1630.2	1692.3	1579	1306.7	1355.1	1386.4	1323.4	1226.6	1281.4	1238.7	1271.8	1178.3	1228.6
Q9VC06	LD37516p OS=Drosophila melanogaster OX=7227 GN=Dmel\CG11771 PE=1 SV=1	0.878	1.067	0.823	0.966	0.848	1.03	2.02856e-08	4.47892e-05	1.14481e-10	0.00853755	8.61142e-10	0.0339852	7632.5	6702.6	8142.4	7903.7	0.83	1.83	0.85	1.43	1	34	81	34	48	81.3	7.08	0	167.853	7660.2	7610	7523.4	7655.1	6702.6	6597	6734.6	6916.4	6641.3	8221.7	8112.3	8172.5	8062.6	7764.9	7870.1	8034.2	7937.4	7027.1	7210.6
A1Z9M5	Titin OS=Drosophila melanogaster OX=7227 GN=Sdb PE=1 SV=1	1.252	0.888	1.409	0.912	1.142	0.81	2.0309e-08	3.02012e-05	9.65009e-11	0.000908565	7.24541e-06	6.90898e-08	2225.6	2785.8	1976.8	2440.2	2.12	3.12	2.05	2.06	1	37	49	37	19	460.7	8.35	0	147.244	2212.7	2231.8	2219.5	2315	2929.3	2873.6	2772.2	2707.1	2785.8	1931.5	1985.2	2029.4	1968.4	2409.8	2524.4	2426.6	2454	2029.8	2114.7
Q9VK99	Atilla, isoform B OS=Drosophila melanogaster OX=7227 GN=atilla PE=4 SV=3	2.173	1.474	1.474	1.067	2.319	1.573	2.16264e-08	8.30558e-05	7.22506e-05	0.327327	4.4384e-09	6.71864e-06	223.9	486.4	330	209.8	6.24	9.42	6.75	9.9	1	2	4	2	12	15.4	7.77	0	5.834	212.8	225.3	246.4	222.4	513.8	486.4	480.3	430.5	557	328.5	317.5	369.6	331.4	209.9	209.7	175.5	222.8	195.2	213.5
A0A0B4K7J2	E3 SUMO-protein ligase RanBP2 OS=Drosophila melanogaster OX=7227 GN=Nup358 PE=1 SV=1	1.161	1.1	1.056	0.971	1.128	1.069	2.25008e-08	1.19165e-05	0.000760008	0.0651854	4.08703e-07	0.000850681	26814.3	31143.9	29500.4	27607.6	1.48	0.99	0.6	2.93	1	93	326	93	39	298.7	6.11	0	616.712	26525.8	26424.8	27106	27201.3	31143.9	31043.4	31507.9	31121.2	31772.4	29694.2	29593.4	29303.3	29407.8	28091.1	26989.6	27132.4	28701.1	24333.7	25037.8
P06742	Myosin light chain alkali OS=Drosophila melanogaster OX=7227 GN=Mlc1 PE=1 SV=4	2.704	0.876	3.086	1.006	2.721	0.882	2.28252e-08	0.341024	4.77166e-09	0.999934	2.40749e-08	0.315965	303.8	821.4	266.2	301.9	8.81	12.55	7.19	11.79	1	3	11	3	22	17.5	4.39	0	21.21	306.4	301.1	347.2	282.6	821.4	752.9	888.3	674.2	926.8	254.2	267.3	299.5	265.1	360	280.5	319.1	285.6	281.1	285.3
Q9VFC7	Mf5 protein OS=Drosophila melanogaster OX=7227 GN=Mf PE=1 SV=2	2.465	0.814	3.026	1.053	2.594	0.857	2.28546e-08	0.047772	1.83428e-09	0.999927	2.16359e-08	0.0529435	2349.2	5789.8	1913.1	2231.8	8.44	10.93	5.92	13.52	1	17	29	17	44	41.6	9.39	0	69.84	2411.4	2288.6	2627	2156.1	6319.9	5520.7	5789.8	5130.3	6760.7	1796.6	1895.2	1931.2	2071.5	2846.3	2169.5	2270.3	2193.9	2212.1	2168.5
A1ZAW0	Endoribonuclease Dcr-2 OS=Drosophila melanogaster OX=7227 GN=Dcr-2 PE=1 SV=1	0.868	1.004	0.865	0.977	0.848	0.981	2.38053e-08	0.9822	1.68197e-08	0.109146	2.71751e-09	0.198347	9325.8	8093.9	9362	9545.9	0.76	2.35	0.57	1.57	1	60	119	60	38	197.6	6.86	0	282.55	9376.1	9366.8	9226.1	9285.1	8186.7	7792.4	8093.9	8275.7	7969.4	9348	9376	9403.9	9279.1	9623.7	9444.6	9468.8	9767.5	8601.3	8875.1
Q9W3N9	LD24105p OS=Drosophila melanogaster OX=7227 GN=Acat1 PE=1 SV=1	0.66	1.259	0.524	0.811	0.535	1.02	2.43469e-08	8.03014e-05	1.6548e-10	0.000181133	2.30254e-10	0.952066	4114.5	2715.1	5178.2	5075.7	3.21	3.22	1.91	7.98	1	17	51	17	63	43.4	8.68	0	106.489	4057.3	4172.6	4330.9	4043.1	2715.1	2644.5	2842.2	2647.6	2792.3	5245.8	5014.5	5183.6	5172.7	5174.3	4979	4594.4	5567.4	3722	3953.5
B7YZV4	Dual specificity calcium/calmodulin-dependent 3',5'-cyclic nucleotide phosphodiesterase 1 OS=Drosophila melanogaster OX=7227 GN=Pde1c PE=1 SV=1	1.464	0.965	1.516	1.117	1.635	1.078	2.44141e-08	0.962627	1.55642e-08	0.129994	3.01241e-09	0.273507	281.4	411.8	271.6	251.9	5.02	4.44	2.63	5.64	1	9	12	9	13	91.4	5.67	0	26.428	280.4	290	282.3	257.6	398.9	411.8	435.2	411.3	444	268	275.3	282.4	266.9	278.2	248.7	255	246.6	257.3	274.7
Q9VM22	MTOR-associated protein MEAK7 OS=Drosophila melanogaster OX=7227 GN=Dmel\CG5149 PE=1 SV=1	0.861	0.982	0.877	0.97	0.836	0.953	2.44301e-08	0.91686	4.56165e-08	0.161337	3.34957e-09	0.0541883	5494.7	4732.5	5395.3	5663.7	1.36	1.02	2.11	1.89	1	19	45	19	39	51.4	6.06	0	108.299	5568.8	5489.7	5388	5499.6	4684.2	4765.3	4696.5	4732.5	4801.4	5619	5386.9	5379	5403.7	5710.6	5699.4	5479.1	5628.2	5108.6	5201.5
Q27268	ATP-dependent RNA helicase WM6 OS=Drosophila melanogaster OX=7227 GN=Hel25E PE=1 SV=1	0.856	0.891	0.961	1.043	0.893	0.929	2.46388e-08	1.05529e-06	0.0344846	0.00725249	1.99171e-06	0.000258831	5186.8	4438.2	4619.8	4972.4	2.09	2.24	0.59	0.74	1	17	71	17	41	48.6	5.66	0	109.947	5250.2	5329.4	5124.1	5098.1	4391.5	4559.4	4373.4	4438.2	4594.9	4619.4	4669.4	4608.8	4620.2	4993.8	4968.5	4976.3	4909.2	4816.3	5049.7
Q02748	Eukaryotic initiation factor 4A OS=Drosophila melanogaster OX=7227 GN=eIF4A PE=1 SV=3	0.909	0.976	0.931	0.971	0.882	0.948	2.53815e-08	0.0200814	1.03059e-06	0.00962784	1.05764e-09	3.23267e-05	12976.8	11790.3	12668.4	13370.2	0.33	1.49	1.06	0.52	1	24	143	22	56	45.8	5.66	0	189.319	13030	12957	12996.5	12932.9	11769.7	11790.3	11624	11893.2	12100.4	12754.4	12517.4	12798.2	12583	13239.2	13387.9	13357.6	13382.9	11953.2	12277
Q8SX83	Protein split ends OS=Drosophila melanogaster OX=7227 GN=spen PE=1 SV=2	1.213	1.142	1.062	0.996	1.209	1.138	2.53815e-08	6.59793e-06	0.00215044	0.842076	5.70317e-08	2.02005e-05	2255.3	2736.7	2576.5	2264.1	2	2.01	1.99	2.59	1	53	70	53	12	599.6	8.63	0	193.681	2224	2287.1	2208.3	2298.8	2673.8	2791.9	2736.7	2702.8	2800.6	2584.9	2490	2607.6	2568	2278	2236.4	2250.3	2367.9	2040.2	2167
Q8SXF2	RH40246p OS=Drosophila melanogaster OX=7227 GN=Dmel\CG5612 PE=2 SV=1	1.507	0.835	1.805	1.175	1.771	0.981	2.5421e-08	0.0033793	7.16551e-10	0.00599368	8.86332e-10	0.988368	277.1	417.4	231.2	235.7	3.55	7.91	3.68	2.37	1	4	6	4	11	48.3	4.53	0	16.7	275.6	278.8	278.5	258.5	417.4	413.3	470.3	402.4	475.9	230.9	223.3	244	231.6	227.8	237.3	234.2	241	252.8	264.1
Q9W350	C11.1, isoform A OS=Drosophila melanogaster OX=7227 GN=c11.1 PE=1 SV=2	1.279	0.954	1.341	1.094	1.399	1.043	2.96837e-08	0.121316	3.42665e-09	0.00263943	7.2734e-10	0.193203	3336.3	4267.4	3182.2	3050	3.95	1.54	1.77	3.28	1	37	66	37	23	193	6.37	0	165.386	3407	3267.1	3461.6	3172.9	4317.1	4175.2	4267.4	4324	4209.8	3160	3226	3099.1	3204.4	3159	3066.7	2917.4	3033.4	3125.4	3095.7
Q9VB99	LD03691p OS=Drosophila melanogaster OX=7227 GN=Tsp97E PE=2 SV=1	0.563	1.21	0.466	0.785	0.442	0.949	3.01408e-08	0.00390537	8.50932e-10	0.000682751	4.42822e-10	0.753522	593.8	334.6	718.2	756.7	5.78	7.76	5.49	6.68	1	2	5	2	7	25	6.62	0	6.74	543.3	610	577.9	617.5	303.3	290.4	334.6	341.7	347.3	713	674	770.1	723.5	802.3	703.3	720.8	794.4	498.4	578
Q7K231	RING-type E3 ubiquitin transferase OS=Drosophila melanogaster OX=7227 GN=CYC4 PE=1 SV=1	0.838	1.027	0.816	0.974	0.816	1	3.04266e-08	0.253961	5.14729e-09	0.161736	4.03482e-09	0.990826	1543.8	1293.5	1585	1584.5	1.1	2.46	0.52	2.56	1	15	26	15	34	58.9	8.13	0	70.262	1556.9	1526	1558.3	1530.7	1267.5	1275.5	1314.4	1346.6	1293.5	1575.1	1592.4	1579.8	1590.2	1642.2	1564.8	1552.7	1604.4	1428.3	1445.9
Q9VVA0	Cold shock domain-containing protein CG9705 OS=Drosophila melanogaster OX=7227 GN=CG9705 PE=1 SV=1	1.843	0.901	2.046	1.043	1.922	0.939	3.08463e-08	0.103119	3.2736e-09	0.486413	7.96853e-09	0.719359	489.5	902.3	440.9	469.5	8.33	7.74	1.69	5.51	1	3	11	3	22	15.8	8.47	0	30.723	457	476.9	552.7	502.5	902.3	911.7	974.5	783.3	895.3	439.3	451	433.1	442.5	454.9	432.1	484.8	484.7	419.2	451.9
A1Z7Z4	Uncharacterized protein, isoform B OS=Drosophila melanogaster OX=7227 GN=Dmel\CG1648 PE=1 SV=1	1.834	1.138	1.612	0.589	1.08	0.67	3.34042e-08	0.139977	3.91188e-07	2.89007e-07	0.421416	4.40247e-06	4139.9	7592	4710.5	7031	7.63	5.2	7.25	6.39	1	16	54	16	77	24.2	9.09	0	96.075	4058.5	3877.8	4627.7	4223	7588.6	6878.9	7802.1	7592	7864	4281.6	5008.6	4909.5	4519.5	7050.3	7011.7	6493.6	7594.3	3723.1	3674.2
Q8IQG9	Adenylate kinase 1, isoform B OS=Drosophila melanogaster OX=7227 GN=Ak1 PE=1 SV=1	1.454	0.78	1.865	1.264	1.838	0.985	3.46055e-08	1.94286e-05	1.12673e-10	1.82252e-05	1.09455e-10	0.999964	1315.2	1912.5	1025.7	1040.8	1.37	6.55	2.82	5.08	1	8	16	8	41	25.3	7.65	0	34.734	1343.4	1324.6	1305.6	1305.9	2103.3	1878.3	1912.5	2157.7	1897.4	998.1	1031.7	1067.4	1019.7	1070.6	1068.4	1013.9	960.6	1232.3	1255
Q9VGP7	Large ribosomal subunit protein mL40 OS=Drosophila melanogaster OX=7227 GN=mRpL40 PE=1 SV=1	1.742	1.072	1.624	0.921	1.605	0.988	3.66993e-08	0.563653	1.42354e-07	0.323274	2.34351e-07	0.966678	1647.8	2870	1766.9	1788.4	2.96	7.58	6.22	4.2	1	7	16	7	41	22.5	9.45	0	37.899	1621	1664.1	1631.6	1730.2	2901	2982.2	2870	2437.7	2785	1753.8	1780.2	1615.8	1881	1767.3	1701.9	1809.7	1881.2	1487.1	1576.8
Q9VTC1	RNA helicase OS=Drosophila melanogaster OX=7227 GN=DmRH27 PE=1 SV=1	0.807	0.818	0.986	0.826	0.667	0.676	3.70811e-08	1.54622e-07	0.836583	1.90615e-07	1.207e-11	3.64846e-11	2960	2388.3	2421.1	3583	1.69	2.21	1.74	3.57	1	30	50	29	47	87.2	6.99	0	156.146	3045.1	2953.9	2928.7	2966	2420.8	2358.5	2382.9	2388.3	2495.6	2505.2	2421.9	2420.3	2418.4	3590.5	3790.2	3575.5	3484.6	2793.4	2798.8
Q9W4E2	Neurobeachin OS=Drosophila melanogaster OX=7227 GN=rg PE=1 SV=4	0.856	1.084	0.79	0.915	0.784	0.993	3.74957e-08	6.38562e-05	1.99312e-10	4.27412e-05	1.68028e-10	0.992762	3972.8	3402.3	4307.9	4339.8	1.51	2.44	0.8	1.68	1	53	80	53	18	384.3	5.36	0	221.529	4004.3	3867.5	3970.8	3974.8	3457.1	3246.8	3357.4	3429.1	3402.3	4284.9	4330.9	4347	4276.8	4381.2	4298.8	4385.8	4234.3	3673.4	3664.5
X2JF73	HECT-type E3 ubiquitin transferase OS=Drosophila melanogaster OX=7227 GN=HUWE1 PE=1 SV=1	1.131	1.056	1.071	0.971	1.098	1.024	4.04454e-08	0.000334728	4.99516e-05	0.0198688	1.88887e-06	0.144011	11444.9	12941.7	12080.3	11791.8	1.08	1.17	0.84	2.08	1	100	183	100	23	557.3	5.45	0	538.785	11418.9	11632.8	11470.9	11340.7	12813.4	12941.7	12706.3	13032.7	13068.5	12264.9	12043.8	12102.4	12058.2	11843	11627.7	11740.9	12197.9	10475.2	11022.3
M9PDR6	Uncharacterized protein, isoform B OS=Drosophila melanogaster OX=7227 GN=Dmel\CG13895 PE=4 SV=1	1.772	0.859	2.063	1.261	2.234	1.083	4.14694e-08	0.0112005	1.60298e-09	0.000580862	5.13599e-10	0.375092	43.9	77.9	37.7	34.8	9.15	7.23	4.45	2.82	1	2	2	2	6	59	6.28	0	5.819	44.6	40.4	50.2	43.3	81.2	77.9	75.3	70.8	85.7	35.5	39.1	36.9	38.6	33.7	34.1	35.6	35.6	40.9	38.3
Q9VIW6	RE17845p OS=Drosophila melanogaster OX=7227 GN=Rab9 PE=2 SV=1	0.735	0.95	0.774	0.969	0.713	0.921	4.25669e-08	0.14779	5.00593e-07	0.79383	1.75325e-08	0.0296573	1252.9	921.1	1190.6	1292.3	2.79	3.82	2.13	4.57	1	8	14	8	32	28.4	8.35	0	38.621	1268.4	1298.7	1219.2	1237.5	899.8	952.6	921.1	973	888.6	1174.4	1207.9	1156.8	1207	1334.2	1251.8	1220	1335.8	1163.6	1230.5
B7YZK5	Jabba, isoform C OS=Drosophila melanogaster OX=7227 GN=Jabba PE=1 SV=1	1.305	1.174	1.112	0.899	1.173	1.055	4.28547e-08	1.7656e-05	0.00151229	0.00129375	1.62707e-05	0.0701729	8268.1	10790.8	9707.6	9201.5	3.05	3.7	1.87	1.35	1	19	110	19	35	62.6	5	0	143.553	8147.4	8174	8700.1	8363.2	10851.9	10891.1	10735.9	9946.9	10790.8	9915.6	9607.4	9808.9	9518	9337.2	9063.1	9266.5	9137	7474.1	7745
P41374	Eukaryotic translation initiation factor 2 subunit 1 OS=Drosophila melanogaster OX=7227 GN=eIF2alpha PE=2 SV=1	0.879	0.938	0.937	1.008	0.886	0.945	4.40987e-08	0.000198098	9.61742e-05	0.947802	7.59486e-08	0.000477561	11705.2	10291.7	10979.6	11617.2	2.32	1.38	0.62	0.98	1	21	93	21	61	38.6	4.94	0	142.573	11990.4	11598.4	11363.6	11813	10324.1	10291.7	10118.9	10506.6	10234.9	11053.8	10894.3	11003.9	10955.4	11553.1	11754.6	11681.7	11508.7	10999.5	10989.7
Q24400	Muscle LIM protein Mlp84B OS=Drosophila melanogaster OX=7227 GN=Mlp84B PE=1 SV=1	2.22	0.841	2.639	0.846	1.878	0.711	4.6752e-08	0.030517	2.65376e-09	0.101878	7.28664e-07	0.000350429	396.9	881	333.8	469.2	1.41	10.23	8.22	10.4	1	9	14	8	19	53.5	8.28	0	29.87	389.8	399.6	394.3	402.3	881	723.6	809.4	902.4	945.6	332.8	334.8	286.8	348.1	521.4	465.6	403.4	472.9	357.6	378.6
Q9VM11	HL01515p OS=Drosophila melanogaster OX=7227 GN=Dmel\CG5973 PE=2 SV=2	0.524	0.937	0.559	1.235	0.647	1.158	4.7042e-08	0.7436	1.33641e-07	0.00565176	5.74477e-06	0.0359396	1820.9	953.5	1707	1474.6	6.49	10.56	3.53	3.55	1	10	18	10	40	36.1	8.48	0	54.79	1884.6	1905.5	1654.7	1759.4	1036.6	953.5	934.6	1127.6	856.3	1749.8	1773.4	1652.5	1665.3	1391.9	1472	1515.4	1477.2	1728.8	1805.5
Q9VIE7	GMP synthase (glutamine-hydrolyzing) OS=Drosophila melanogaster OX=7227 GN=bur PE=1 SV=3	0.878	1.056	0.832	1.029	0.903	1.086	4.70438e-08	0.00327017	1.08376e-09	0.118403	6.60088e-07	5.8639e-05	8887.9	7801.9	9382.7	8638.4	0.67	2.15	1.68	0.89	1	27	87	27	48	76.7	6.8	0	178.944	8925.8	8970.7	8848.7	8850.1	7916.7	7610	7640.2	7801.9	7992.7	9476.5	9115.1	9400.2	9365.3	8643.9	8779.5	8609	8632.8	8188.1	8499.8
Q9VNA5	Proteasome subunit beta type-4 OS=Drosophila melanogaster OX=7227 GN=Prosbeta7 PE=2 SV=1	1.285	1.058	1.215	0.973	1.251	1.029	4.87756e-08	0.126792	6.56302e-07	0.605238	1.79747e-07	0.671543	1878.7	2414.6	1987.2	1930.5	1.43	1.91	2.95	4.5	1	9	40	9	38	30	6.58	0	79.342	1879.9	1877.4	1927.9	1867.5	2435.9	2353	2414.6	2410.2	2480.6	1965.9	2008.7	2046.4	1910.1	2050.9	1946	1915	1840.8	1724.5	1778.9
Q0E8H7	FI19426p1 OS=Drosophila melanogaster OX=7227 GN=SP1173 PE=2 SV=1	1.898	1.046	1.814	1.061	2.014	1.11	5.03481e-08	0.771566	1.36056e-07	0.727468	1.83123e-08	0.234476	464.8	882.2	486.2	438.1	4.91	10.22	5.63	5.38	1	4	8	4	5	82.3	6.14	0	14.121	450.8	488.4	479.1	440.3	966.9	765.3	788.5	882.2	935.6	457.3	479.9	523.2	492.5	471.8	435.3	440.9	414.5	413.6	462.8
Q9V5Q4	Pre-mRNA-splicing factor Syf2 OS=Drosophila melanogaster OX=7227 GN=Syf2 PE=2 SV=1	1.431	1.066	1.342	1.071	1.533	1.142	5.04371e-08	0.237982	4.28466e-07	0.265306	8.22592e-09	0.0082992	403.9	578.1	430.7	377.1	2.97	6.45	2.79	3.64	1	7	12	7	32	26.5	9.57	0	38.996	402.2	384.6	405.5	412.6	554.5	578.1	553.3	606.9	642.5	410.1	434.2	427.3	436.5	376.1	361.9	395.5	378.2	369	364.4
O76206	Putative riboflavin kinase OS=Drosophila melanogaster OX=7227 GN=Rfk PE=2 SV=1	0.741	1.413	0.524	0.971	0.719	1.373	5.1325e-08	7.26244e-09	5.07949e-12	0.563279	1.43364e-08	2.29291e-08	1338.4	991.2	1891.3	1377.7	2.4	5.36	0.44	1.76	1	7	14	7	59	17	6.32	0	35.051	1362.3	1322.6	1292.4	1354.3	1047	960	954	1076	991.2	1897	1891.8	1877.5	1890.8	1366.7	1344.3	1398.4	1388.8	1249.7	1253.2
Q9VN14	Contactin OS=Drosophila melanogaster OX=7227 GN=Cont PE=1 SV=2	1.246	0.991	1.257	1.071	1.334	1.061	5.1652e-08	0.995661	4.12143e-08	0.00696123	1.55712e-09	0.0105308	5518.2	6874.6	5468.9	5153.6	1.65	3.05	2.97	1.69	1	38	69	38	31	158.1	6.79	0	170.648	5548.7	5487.8	5595.7	5385.9	6874.6	6530.9	6883.1	6710.3	7084.6	5300.7	5476.7	5696.9	5461.1	5183.3	5199.7	5008.6	5124.1	5090.2	5199.7
A1ZA47	PDZ and LIM domain protein Zasp OS=Drosophila melanogaster OX=7227 GN=Zasp52 PE=1 SV=2	1.327	0.957	1.386	1.028	1.364	0.984	5.23014e-08	0.272295	8.62984e-09	0.38025	1.07299e-08	0.994662	2060.6	2734.4	1972.5	2004.5	2.02	4.53	1.06	3.19	1	12	16	12	6	237.9	6.42	0	53.577	2118.2	2056.3	2064.8	2017	2822	2547.9	2617.5	2734.4	2820.1	1983.7	2005	1961.3	1961.2	2047.9	2015.5	1993.5	1900.3	1943.1	1948.4
Q9VIM0	GH14278p OS=Drosophila melanogaster OX=7227 GN=38C.55 PE=1 SV=1	1.291	1.196	1.079	1.594	2.058	1.907	5.5464e-08	5.11291e-06	0.0142344	1.12268e-10	4.26426e-12	4.65017e-12	1713.4	2211.6	2049.3	1074.6	3.82	2.49	2.31	3.4	1	7	17	7	19	53.7	5.71	0	39.729	1685.7	1741.6	1751.9	1610.4	2163	2128.2	2211.6	2258.2	2244.5	1984.9	2070.9	2091	2027.9	1115.6	1072.4	1076.9	1026.5	1546.4	1650.2
X2J9Z3	Stolid, isoform H OS=Drosophila melanogaster OX=7227 GN=stol PE=1 SV=1	2.643	1.067	2.478	1.133	2.995	1.209	5.70656e-08	0.481601	2.70574e-07	0.578187	1.61883e-08	0.066838	48.8	128.9	52	43	10.26	6.61	13.69	16.21	1	6	7	6	6	143.6	6.34	0	13.17	51.7	48.6	49	40.4	137.5	125.7	122	128.9	143.1	47	64.3	51.6	52.5	43.2	42.9	33.9	50.9	47.4	46
Q9VRR3	Uncharacterized protein, isoform A OS=Drosophila melanogaster OX=7227 GN=CG10727 PE=1 SV=2	1.298	1.089	1.193	1.007	1.308	1.096	6.18017e-08	0.00423206	1.05022e-05	0.929494	3.39661e-08	0.00145351	169.1	219.6	184.1	167.9	2.96	2.96	2.24	4.4	1	4	4	4	17	28.1	5.97	0	14.486	171	169.4	168.9	160	225.8	228.3	219.6	214.5	213.8	180.9	181.6	186.7	189.6	167.8	170.2	154.3	168	156.9	160.5
Q9I7N2	Nucleoporin NUP42 OS=Drosophila melanogaster OX=7227 GN=Dmel\CG18787 PE=4 SV=3	0.85	0.954	0.891	1.143	0.971	1.091	6.37058e-08	0.0241418	2.9609e-06	6.1228e-07	0.400627	4.47555e-05	608	516.6	580.1	531.8	2.51	1.49	0.58	2.16	1	8	13	8	26	44.3	6.76	0	37.628	585.4	601.8	619.6	614.2	516.2	531	510.2	516.6	521.2	582.9	578.3	581.9	575.6	536	527.7	540	514.1	537	570.2
Q8MS69	tRNA (adenine(58)-N(1))-methyltransferase non-catalytic subunit TRM6 OS=Drosophila melanogaster OX=7227 GN=Trmt6 PE=2 SV=1	0.809	0.864	0.937	0.994	0.804	0.859	6.3921e-08	3.24871e-06	0.0369591	0.993871	8.29933e-08	4.48845e-06	1866.6	1509.8	1612.1	1877.2	2.55	3.41	1	2.03	1	13	26	13	32	49.9	6.64	0	60.089	1954.5	1879.9	1852	1853.3	1538.7	1498.6	1486.4	1616.6	1509.8	1590.5	1626.3	1620	1604.2	1878	1876.3	1922.3	1828.9	1793	1781.3
A1ZAI3	Putative fatty acyl-CoA reductase CG8303 OS=Drosophila melanogaster OX=7227 GN=CG8303 PE=2 SV=3	0.543	0.688	0.789	1.28	0.695	0.881	6.55805e-08	3.05082e-05	0.00162316	0.00159124	2.55936e-05	0.111057	5478.7	2976	3769.8	4281.2	4.92	10.8	2.25	6.03	1	13	40	12	28	61.9	8.31	0	79.899	5585.4	5612.2	5036.9	5374.1	3026.5	2976	2839.8	3493.4	2616.1	3805.9	3808.2	3628.6	3734.1	3934.7	4438.8	4467	4129.2	5123.8	5317.7
P35415	Paramyosin, long form OS=Drosophila melanogaster OX=7227 GN=Prm PE=1 SV=1	2.06	0.872	2.364	0.909	1.874	0.793	6.82331e-08	0.175696	8.43633e-09	0.171312	7.82991e-07	0.0034578	6018.4	12400.9	5246.8	6618.5	5.39	10.04	5	14.11	1	52	103	52	59	102.3	5.58	0	296.8	6323.2	6289.1	5729.1	5759.4	13496	12097.7	12400.9	11912	15051.1	4947	5066.2	5467.9	5433.8	8422.6	6858.4	6292.7	6387	5800.6	5959
Q8IQB7	MIP21654p OS=Drosophila melanogaster OX=7227 GN=BcDNA:RH42907 PE=1 SV=1	2.437	0.997	2.444	1.333	3.247	1.329	6.90251e-08	0.999989	6.69106e-08	0.0158682	2.71257e-09	0.0167797	132.9	323.9	132.5	99.7	8.4	13.4	6.89	12.89	1	3	3	3	9	32.2	7.72	0	7.851	131.9	142.3	133.9	115.9	392.5	285.3	297.9	323.9	361.2	118.4	135.5	138.9	129.6	100.7	98.8	83.6	115	121	134.8
A1ZBM2	Tubulin-binding cofactor B OS=Drosophila melanogaster OX=7227 GN=Tbcb PE=1 SV=1	1.167	1.173	0.995	1.014	1.183	1.189	6.9033e-08	6.79631e-08	0.897914	0.560173	1.87475e-08	1.97066e-08	2500.9	2919.2	2933.9	2467.3	2.08	1.68	2.58	0.77	1	9	27	9	39	27	5.19	0	54.421	2471.8	2448.3	2561.6	2530.2	2916.3	2921.2	3008.9	2874.3	2919.2	2931.8	2885.1	3062.9	2936	2430.8	2470.3	2468.4	2466.2	2267.6	2319.8
Q9VJG4	GEO09352p1 OS=Drosophila melanogaster OX=7227 GN=osi PE=2 SV=1	0.725	0.879	0.825	1.052	0.763	0.924	6.91988e-08	0.0035521	1.41746e-05	0.117743	1.05201e-06	0.255332	910.3	660.2	799.9	865.5	2.95	3.93	1.25	6.67	1	3	10	3	34	10.1	9.86	0	14.752	952.8	916.4	889.5	904.2	660.2	611.7	661.7	662	619	795.5	804.4	795.3	816.5	776.8	890.5	901.5	841.3	874	868.3
A1Z992	1,4-alpha-glucan branching enzyme OS=Drosophila melanogaster OX=7227 GN=AGBE PE=1 SV=1	0.767	0.856	0.896	1.002	0.769	0.858	6.96071e-08	7.93732e-05	0.000561262	0.939975	3.94186e-08	3.41621e-05	7623	5848.9	6524.2	7606.2	2.39	3.57	1.82	4.36	1	33	78	33	58	79.1	6.25	0	183.256	7407.5	7779.9	7743.8	7504.1	5606.3	5640	6115.4	5848.9	5902.4	6704.2	6417.2	6530.6	6517.8	7521.6	7440.3	7691.7	8189.6	6795.3	7371.6
Q07152	Inosine-5'-monophosphate dehydrogenase OS=Drosophila melanogaster OX=7227 GN=ras PE=1 SV=1	0.844	1.065	0.792	0.963	0.812	1.025	7.1214e-08	0.00152127	1.06787e-09	0.121152	7.16207e-09	0.116639	6578.5	5550.1	7007	6832.9	0.96	1.56	1.16	3.36	1	20	97	20	44	57.8	7.43	0	177.022	6604.5	6473.4	6609.5	6552.6	5550.1	5478.4	5479.5	5610.7	5678.7	7044.2	6970	7129.2	6948.7	6856.3	7016.4	6809.6	6474.1	6058.7	6133.6
Q9VIK9	eEF1A lysine and N-terminal methyltransferase homolog OS=Drosophila melanogaster OX=7227 GN=CG2614 PE=2 SV=1	0.818	0.925	0.883	1.077	0.88	0.997	7.16118e-08	0.00336998	1.55334e-05	0.00180355	2.61746e-05	0.984323	2868.5	2345.2	2654.7	2664	2.1	2.64	2.02	2.83	1	15	38	15	26	76	6.46	0	84.018	2930.9	2850.4	2886.7	2788.7	2345.2	2334.3	2227.2	2367	2384.5	2708.5	2589.5	2627.6	2682.1	2526.1	2690.2	2656.5	2671.5	2688.7	2700.8
Q9VJE3	LD24839p OS=Drosophila melanogaster OX=7227 GN=Dmel\CG15141 PE=1 SV=1	0.764	1.086	0.704	0.855	0.653	0.928	7.3181e-08	0.0122616	2.54167e-09	7.3197e-05	3.21869e-10	0.0430002	1544.6	1180.4	1676.9	1806.4	1.96	4.82	2.16	2.49	1	12	25	12	31	45.9	4.93	0	74.461	1556.8	1532.6	1511.7	1581.7	1205	1107.9	1149.2	1258.7	1180.4	1700.2	1654.1	1651.8	1726	1844.8	1756.8	1839.2	1774.1	1428.2	1452.1
A0A6M3QH40	CAP, isoform AC OS=Drosophila melanogaster OX=7227 GN=CAP PE=4 SV=1	1.705	0.887	1.922	1.127	1.923	1	7.56157e-08	0.169585	9.04249e-09	0.438551	1.6629e-08	0.907022	703.6	1199.8	624.4	624.1	5.2	8.17	4.96	8.23	1	20	26	20	9	288.6	5.88	0	80.568	726.2	721.9	685.9	648.7	1306.7	1177.3	1199.8	1114.6	1363	587.4	619.3	662.7	629.5	725.5	611.3	625.4	622.7	666.2	684
A0A6F7S5S7	Chorion protein a at 7F, isoform B OS=Drosophila melanogaster OX=7227 GN=Cp7Fa PE=4 SV=1	0.566	0.877	0.646	1.039	0.588	0.911	7.67282e-08	0.0867711	1.49001e-06	0.849029	1.80155e-07	0.311474	4399	2490.6	3858.1	4233.7	4.94	10.54	4.92	4.16	1	11	31	11	33	38.1	7.33	0	45.16	4104.1	4471.2	4610.8	4328	2506	2508.7	2490.6	2417.8	1928.6	3841.3	3551.2	3993.1	3875	4306.2	3962.7	4349.2	4162.4	3765	4236.5
Q7KN75	Dodeca-satellite-binding protein 1, isoform A OS=Drosophila melanogaster OX=7227 GN=Dp1 PE=1 SV=1	0.848	0.951	0.891	0.974	0.825	0.926	7.6885e-08	0.00826264	8.43796e-06	0.389269	1.54458e-08	0.00046122	27758.5	23534.5	26400.2	28512.1	1.55	2.47	1.4	2.02	1	63	233	62	50	144.2	6.2	0	344.591	28450.5	27924.6	27490.5	27593.3	24162.9	23534.5	23278.3	24438.1	23062.5	26559.3	26810.3	25965.6	26242	28088.5	28942.1	29059.6	27936	26099.3	26458.9
Q8STG9	DSec61alpha OS=Drosophila melanogaster OX=7227 GN=Sec61alpha PE=1 SV=1	0.803	0.862	0.932	1.003	0.806	0.865	7.74666e-08	1.69652e-05	0.00479933	0.996343	6.22608e-08	1.2627e-05	7618.3	6121.2	6569.4	7592.1	1.88	3.88	0.76	2.18	1	11	79	11	22	52.2	8.24	0	93.349	7724.9	7602.4	7387.8	7634.3	6176.5	6121.2	6039.3	6477.6	5821.5	6660.8	6552.9	6555.7	6583.1	7448.4	7836.6	7642.1	7542.5	7086.5	7203.3
Q7K1W4	Epoxide hydrolase OS=Drosophila melanogaster OX=7227 GN=Jheh3 PE=2 SV=1	1.371	1.022	1.341	1.745	2.392	1.784	7.91891e-08	0.322832	5.6145e-07	1.05905e-10	4.27192e-12	3.64468e-11	2997.1	4108.2	3064.4	1717.3	3.4	3.7	4.77	2.27	1	12	20	12	25	53.7	6.33	0	52.181	2861	2964.1	3099.7	3030.5	4108.2	4033.9	4117	3789.5	4167.7	3354	3058.8	3040.3	3070	1773.7	1707.6	1680.9	1727	2624.5	2808.5
P36188	Troponin I OS=Drosophila melanogaster OX=7227 GN=wupA PE=2 SV=3	3.003	0.972	3.091	0.998	2.996	0.969	8.03114e-08	0.86003	3.65265e-08	0.999907	7.53024e-08	0.886557	1322.2	3970.5	1284.6	1325.5	7.77	15.8	9.13	8.88	1	7	13	7	17	30.1	9.51	0	20.537	1329.7	1463.2	1314.8	1211.4	3970.5	3895.8	4040	2670.9	4009.2	1081.1	1322	1321.8	1248.4	1464.6	1339.6	1311.5	1178.3	1219.8	1386.4
E1JGK8	Uncharacterized protein, isoform A OS=Drosophila melanogaster OX=7227 GN=CG5134 PE=4 SV=1	1.501	1.469	1.022	0.61	0.916	0.897	8.25017e-08	1.46425e-07	0.999922	1.79598e-08	0.128179	0.171348	508.5	763.1	747	833.2	2.55	2.88	5.12	7.84	1	5	10	5	52	10.2	10.21	0	16.093	524.5	515.6	496	501.5	795.9	770.2	763.1	758.6	734.8	825.3	746.5	747.3	746.8	878	889.5	790.8	757.2	481.1	488.5
Q9VFQ9	Dipeptidase B, isoform A OS=Drosophila melanogaster OX=7227 GN=Dip-B PE=1 SV=2	1.393	1.269	1.098	1.091	1.519	1.384	8.3393e-08	9.27642e-06	0.0128621	0.0168517	3.21981e-09	1.50238e-07	11474.2	15980.6	14556.9	10521	4.55	2.08	6.25	1.02	1	27	111	27	61	55.5	6.76	0	152.572	11700.7	11252.1	12306	11144	15580.4	16297.6	15980.6	15823.3	16383.2	13456.5	14373.6	15652.7	14742.4	10376	10630.3	10488.4	10553.7	10733.7	10661.5
Q9VKX2	Malate dehydrogenase OS=Drosophila melanogaster OX=7227 GN=Mdh1 PE=1 SV=2	0.892	0.932	0.958	0.97	0.866	0.904	8.47561e-08	1.64781e-05	0.00590073	0.151515	9.37687e-09	9.12871e-07	11975.4	10685.1	11155.6	12343.5	1.6	0.78	1.47	1.73	1	18	108	18	55	36	7.39	0	115.314	11925.6	11825.5	12274.6	12025.5	10624	10685.1	10741.2	10815.4	10617.3	10909.6	11072	11260.3	11239.8	11991.9	12395.9	12479.2	12291.4	10940	11204.8
Q8IQJ7	Transmembrane protein 19 OS=Drosophila melanogaster OX=7227 GN=Dmel\CG10171 PE=2 SV=1	1.284	1.091	1.176	1.07	1.373	1.168	8.69555e-08	0.00954246	8.93268e-06	0.0399553	4.90887e-09	5.60031e-05	424.2	544.5	462.9	396.4	3.93	3.93	2.18	2.21	1	4	6	4	9	36.5	9.77	0	12.178	419	429.5	449	409.9	556.3	541.6	542.5	544.5	593.2	457.2	458.4	479.1	467.6	410.3	396.5	389.2	396.4	384.3	407
Q9VTH0	Procollagen-lysine,2-oxoglutarate 5-dioxygenase OS=Drosophila melanogaster OX=7227 GN=Plod PE=1 SV=1	0.7	0.705	0.994	1.29	0.903	0.909	8.78867e-08	1.84955e-07	0.999397	1.05101e-05	0.0118612	0.0206068	3220.2	2254.7	2269.1	2496.1	5.25	4.41	3.18	3.83	1	17	31	17	27	82.5	5.68	0	67.554	3342.1	3291.7	2968.5	3150.3	2194.8	2260.9	2121.7	2254.7	2390.1	2254.7	2315.7	2150.4	2283.5	2428.3	2591.1	2565.8	2401.4	3065.9	3118.9
Q9W3M7	RNA helicase OS=Drosophila melanogaster OX=7227 GN=mahe PE=1 SV=1	0.891	0.956	0.932	1.057	0.941	1.01	9.1095e-08	0.00377978	1.99331e-05	0.000739742	8.40032e-05	0.788615	8480.4	7557	8107	8026.8	1.23	1.92	1.05	1.33	1	33	123	30	41	100.4	9.14	0	210.612	8582.3	8494.8	8330.9	8466	7474	7581.2	7269.4	7640.8	7557	7975.7	8177.4	8123.3	8090.8	8033.7	8019.9	8130	7871.1	7873	8048.9
Q9V5Z7	Aquaporin OS=Drosophila melanogaster OX=7227 GN=Drip PE=2 SV=2	1.836	1.113	1.649	1.086	1.993	1.209	9.40078e-08	0.125721	1.44864e-06	0.749635	3.41953e-08	0.021333	458.1	841	510	422	9.6	3.64	6.81	9.75	1	5	7	5	16	25.6	6.9	0	22.062	464.5	497.5	451.8	393.5	855.2	812.1	819.3	841	888.8	482.3	551.6	535.4	485.8	473.2	453.4	392.1	392.8	426.1	471.4
M9MRX4	Ankyrin 2, isoform U OS=Drosophila melanogaster OX=7227 GN=Ank2 PE=1 SV=1	1.474	1.386	1.063	1.127	1.66	1.562	9.40525e-08	2.01276e-06	0.149095	0.0102666	2.84827e-09	3.60821e-08	281.2	414.4	389.7	249.6	2.29	4.37	4.22	7.59	1	6	10	4	5	1487.5	5.03	0	14.991	289.1	283.9	278.5	274.3	450.6	414.3	402.9	429.6	414.4	383.5	396.1	411.8	373.6	262.8	237.9	224.6	261.8	265.2	269
Q9W2I2	Queuosine 5'-phosphate N-glycosylase/hydrolase OS=Drosophila melanogaster OX=7227 GN=Dmel\CG9752 PE=1 SV=1	0.779	0.821	0.949	1.203	0.937	0.987	9.50835e-08	1.81051e-06	0.175957	3.68008e-06	0.0634634	0.937874	4821.9	3755.8	3958.7	4009.8	0.77	1.26	1.23	5.87	1	16	41	16	47	39.5	5.73	0	65.374	4765.9	4855.2	4823.5	4820.2	3712.3	3755.8	3752.7	3835.4	3799.6	3943.7	3871.7	3973.7	3975.8	4210.3	3849.7	3741.2	4176.7	4372.1	4600.4
Q9W1H6	GH04238p OS=Drosophila melanogaster OX=7227 GN=Dmel\CG5597 PE=1 SV=1	1.75	0.948	1.845	1.066	1.866	1.011	9.62106e-08	0.829178	4.06165e-08	0.953031	5.65618e-08	0.986757	310.7	543.5	294.5	291.3	4.51	8.59	2.67	9.52	1	3	5	3	16	29.6	4.65	0	14.967	315.9	317.5	305.4	287.5	543.5	490.3	549.1	513.2	613.6	289.5	299.6	301.2	285	338.5	303.3	276.8	279.8	289.8	300.8
Q7PLI7	Serine/threonine-protein kinase CG17528 OS=Drosophila melanogaster OX=7227 GN=CG17528 PE=1 SV=1	0.823	0.955	0.862	1.016	0.836	0.97	9.79586e-08	0.131437	1.47184e-06	0.611193	3.80649e-07	0.678293	2975.9	2449.3	2841.7	2930.2	1.7	3.57	1.44	1.9	1	20	34	20	30	82.9	7.77	0	106.678	2990.8	3036.8	2916.8	2961.2	2460.9	2356.4	2449.3	2580.4	2381.3	2842.6	2840.9	2829.1	2919.2	2833.9	2961.2	2927.7	2932.6	2743.6	2877.4
Q8MSU3	Putative ferric-chelate reductase 1 homolog OS=Drosophila melanogaster OX=7227 GN=CG8399 PE=2 SV=1	0.784	0.707	1.109	1.287	1.009	0.91	9.88172e-08	2.74967e-09	0.00124005	8.09898e-08	0.8203	0.00853922	1975.9	1549.8	1397.2	1535.7	2.57	1.02	1.7	5.16	1	9	15	9	18	70.2	8.05	0	37.228	2021.7	1946	2006.2	1913.9	1569.6	1549.8	1527.1	1540.7	1554	1382.7	1430.8	1411.9	1382	1522.4	1604.1	1549.2	1416.8	1854.6	1843.9
Q7JYX2	RH23455p OS=Drosophila melanogaster OX=7227 GN=Dmel\CG2065 PE=1 SV=1	3.249	0.801	4.054	0.824	2.677	0.66	9.9292e-08	0.192675	1.23325e-08	0.148122	1.36546e-06	0.00326673	113.8	369.6	91.2	138.1	5.98	18.97	5.63	13.2	1	8	13	3	29	33.4	9.25	0	34.998	113.9	115	101	113.7	377.3	297.8	369.6	399.7	246	84.1	94.9	88.4	94	125	156.8	152.5	121.3	104.4	108.9
Q9V3C6	EG:BACR42I17.10 protein OS=Drosophila melanogaster OX=7227 GN=EG:BACR42I17.10 PE=2 SV=1	2.37	1.283	1.847	0.766	1.816	0.983	1.0725e-07	0.021629	6.33641e-06	0.0179302	7.3051e-06	0.999591	124.1	294	159.2	161.9	10.11	9.96	1.73	13.84	1	2	5	2	3	52.4	7.02	0	9.703	111.6	117.1	131.4	139	270.1	294	294.9	241.1	314.5	161.1	159.8	158.6	154.7	133.9	153.2	185.3	171.2	102.4	111
A1ZB73	Glutathione S transferase E8, isoform A OS=Drosophila melanogaster OX=7227 GN=GstE8 PE=1 SV=1	1.512	1.716	0.881	0.658	0.994	1.128	1.17005e-07	7.37286e-09	0.00974209	2.49604e-07	0.999146	0.0111147	423.5	640.4	726.5	644	3.52	5.09	6.58	4.87	1	3	7	3	14	24.9	6.13	0	11.471	413.3	428	447.6	419	640.4	686.8	610.1	616	666.9	792.1	696	693.8	758.4	650.6	675.5	600.6	637.5	379.1	405.5
Q9V8R9	Protein 4.1 homolog OS=Drosophila melanogaster OX=7227 GN=cora PE=1 SV=1	1.417	1.051	1.348	1.108	1.57	1.165	1.2924e-07	0.406129	7.96678e-07	0.125319	1.21496e-08	0.00701796	13729.6	19451.7	14428.3	12387.1	2.64	5.67	3.26	5.83	1	73	184	73	50	184.1	8.7	0	429.443	13717.4	13741.8	13817.1	13045.7	20960.8	18184.5	19355.6	19451.7	20664.2	13680.8	14537.8	14764.9	14319.6	13472.2	12817.6	11960	11971.1	12583.8	13020.5
P17210	Kinesin heavy chain OS=Drosophila melanogaster OX=7227 GN=Khc PE=1 SV=2	1.144	1.087	1.053	0.983	1.125	1.069	1.29919e-07	3.67968e-05	0.00437452	0.240483	1.27497e-06	0.000860814	16017.9	18320.4	17406.4	16288.5	1.85	0.78	1.73	2.33	1	64	196	64	67	110.3	5.77	0	441.055	15698.2	15839	16198.7	16328.8	18320.4	18174.5	18558.7	18265.7	18374.7	17850.9	17197.2	17558.8	17255.3	16445.5	16133.1	16113.5	16933.3	14400.9	15007.7
Q9W5N0	Cytochrome c oxidase assembly factor 7 homolog OS=Drosophila melanogaster OX=7227 GN=Coa7 PE=2 SV=1	0.786	1.143	0.688	0.91	0.715	1.04	1.33637e-07	3.2769e-05	3.28977e-10	0.000918341	1.32876e-09	0.201151	1998.6	1571.3	2284.8	2196.9	2.49	3.88	1.81	2.1	1	9	18	9	35	29.6	7.77	0	42.117	1911.9	2023.2	1989.7	2007.6	1571.3	1657.3	1506.2	1640.5	1562.7	2344	2301.4	2249.4	2268.4	2190.5	2253.1	2203.4	2140.8	1753.9	1917
Q9I7J0	GH21596p OS=Drosophila melanogaster OX=7227 GN=Dmel\CG5023 PE=1 SV=1	1.704	0.96	1.776	1.035	1.763	0.993	1.37507e-07	0.777488	5.14193e-08	0.999022	1.59323e-07	0.701193	2102.1	3582	2017.3	2032	1.49	5.1	3.07	12.68	1	8	34	8	56	19.1	8.13	0	75.869	2103.7	2143.2	2100.5	2066.5	3582	3294.8	3575.7	3636.4	3800.2	1932.3	2036.3	2077.6	1998.5	2521.1	2091.1	1929.7	1974.5	1929.8	2030.7
P05130	Protein kinase C, brain isozyme OS=Drosophila melanogaster OX=7227 GN=Pkc53E PE=2 SV=2	1.651	1.115	1.481	0.905	1.494	1.008	1.3831e-07	0.12103	2.3788e-06	0.0828244	3.18438e-06	0.995873	495.1	817.6	551.9	547.4	7.48	6.65	3.58	4.8	1	9	13	9	13	77.6	7.14	0	27.484	453.5	480	538.9	510.7	821.4	702.9	828.1	817.2	817.6	541.4	562.6	524.3	566.5	589.3	560.2	532.2	534.9	416	454.8
Q961B3	5' nucleotidase A, isoform A OS=Drosophila melanogaster OX=7227 GN=Nt5a PE=1 SV=1	0.899	0.838	1.072	1.023	0.919	0.858	1.42753e-07	3.95394e-10	6.35727e-06	0.265313	1.30974e-06	1.3343e-09	2098.3	1885.6	1758.9	2050.9	0.99	1.14	1.67	1.21	1	13	26	13	34	60.4	8.82	0	71.206	2114.7	2103	2066.3	2093.6	1875.7	1906.7	1882.2	1885.6	1928.1	1735.1	1762.9	1755	1805.1	2040.4	2040	2093.1	2061.5	1940	1992.6
Q9VGV8	GM03430p OS=Drosophila melanogaster OX=7227 GN=Dmel\CG4511 PE=2 SV=1	0.86	1.172	0.734	0.874	0.752	1.025	1.47916e-07	1.26146e-06	7.19911e-11	9.39635e-06	1.98137e-10	0.412801	1873	1611.6	2195.7	2142.9	3.42	1.77	1.95	0.68	1	10	23	10	46	25.1	6.18	0	48.047	1992.5	1859.4	1852.4	1886.7	1566.3	1611.6	1630	1627.8	1581.3	2252.5	2211.1	2180.4	2152.6	2145	2140.8	2166.8	2132.8	1827.8	1761.8
P29327	Small ribosomal subunit protein eS6 OS=Drosophila melanogaster OX=7227 GN=RpS6 PE=1 SV=1	0.854	0.993	0.859	1.029	0.878	1.022	1.57253e-07	0.797159	4.3575e-07	0.195253	1.89626e-06	0.629945	11721.8	10005.6	11643.3	11393.2	2.44	1.6	3.12	0.74	1	14	85	14	40	28.4	10.74	0	89.578	12090.4	11898.6	11547.6	11488	10005.6	10040.1	9729.7	10116.5	9833.8	11523.1	11764.7	11127.6	11970.4	11376.3	11470.9	11410.2	11270.7	11091.2	11274.1
A1ZAB5	Protein clueless OS=Drosophila melanogaster OX=7227 GN=clu PE=1 SV=1	0.832	0.923	0.901	1.033	0.86	0.954	1.57507e-07	0.00137276	0.000108668	0.527857	7.60817e-07	0.0166539	23960.3	19934	22118.2	23188.2	2.22	2.64	1.62	1.19	1	59	209	59	43	160.8	6.6	0	343.281	24016.1	23904.6	22935.2	24025.5	19651.2	20619.6	19934	20901.3	19890.2	22474	22092.7	21606.3	22143.8	23165.3	23211.2	22969.8	23629	22031.4	22649.9
Q7KS11	Uracil-DNA degrading factor, isoform B OS=Drosophila melanogaster OX=7227 GN=Ude PE=1 SV=1	1.999	0.675	2.964	1.615	3.229	1.09	1.59692e-07	0.000147735	6.96972e-10	2.19727e-05	3.062e-10	0.59199	246.8	493.5	166.5	152.8	4.32	7.58	6.74	14.23	1	6	8	6	21	35.5	8.94	0	16.333	238.9	255	235.6	256	513.6	493.5	455.2	547.5	464.4	179.5	168	152.2	165	178.5	140.2	131.7	166.6	219.1	241.6
Q9VZI3	Unc-112-related protein OS=Drosophila melanogaster OX=7227 GN=Fit1 PE=1 SV=1	1.254	1.057	1.186	0.973	1.22	1.029	1.65182e-07	0.0335253	7.96752e-06	0.170668	2.24367e-06	0.782417	3276.6	4109.3	3465	3368.6	0.97	2.8	2.06	4.45	1	20	45	17	29	80.4	7.72	0	103.028	3277.1	3226	3301.6	3276.2	4157.9	3882.8	4109	4109.3	4155.5	3426.7	3494	3583.1	3436.2	3643.8	3349.3	3304.7	3388	3006.3	3056.6
Q9W141	Putative ATP synthase subunit f, mitochondrial OS=Drosophila melanogaster OX=7227 GN=ATPsynF PE=3 SV=1	0.684	0.95	0.72	0.994	0.68	0.945	1.72577e-07	0.469587	9.55352e-07	0.998353	2.06269e-07	0.562499	2393.2	1636	2273.7	2406.7	1.6	7.78	1.05	3.2	1	5	25	5	48	12.5	10.1	0	28.569	2374	2412.5	2344.5	2429.8	1636	1621.8	1607.6	1921.5	1658	2311.3	2283.3	2258.5	2264.1	2267.5	2432.9	2391.3	2422.3	2177.8	2285.9
Q0E8G6	Cleavage and polyadenylation specificity factor subunit 5 OS=Drosophila melanogaster OX=7227 GN=Cpsf5 PE=1 SV=1	0.883	1.056	0.836	0.927	0.819	0.979	1.72776e-07	0.0015435	1.96783e-09	9.30278e-05	6.01344e-10	0.358134	2155.1	1903.4	2276.2	2324.1	2.12	0.64	2.4	0.53	1	11	40	11	45	26.9	8.85	0	68.449	2141.2	2221.1	2113.7	2169	1927.9	1903.4	1914.7	1901.8	1897.8	2356.6	2224	2281.2	2271.1	2319.6	2316.4	2328.7	2344.1	1964.3	2104.5
Q7KQM6	GIGYF family protein Gyf OS=Drosophila melanogaster OX=7227 GN=Gyf PE=1 SV=2	0.867	0.947	0.915	0.995	0.863	0.942	1.74677e-07	0.00699065	3.00631e-05	0.998577	1.47673e-07	0.00526831	8836.7	7661.3	8369.6	8881.4	1.53	2.59	1.52	1.67	1	53	113	53	43	173.6	7.11	0	295.984	9004.7	8692.1	8782.9	8890.9	7746.8	7801.5	7329.7	7661.3	7474	8440.6	8299.2	8223.9	8501.2	8924.2	8668.4	8838.7	9016	8260.6	8235.9
Q9VBU5	3-dehydrosphinganine reductase OS=Drosophila melanogaster OX=7227 GN=Kdsr PE=1 SV=1	1.182	1.212	0.975	0.923	1.091	1.119	1.7492e-07	4.46721e-08	0.207103	0.000910106	0.000189261	1.58172e-05	958.3	1132.5	1161.4	1037.9	2.38	1.51	1.47	3.04	1	8	19	8	26	36.5	8.07	0	41.704	931.3	986.9	960.9	955.6	1118.4	1113.8	1132.5	1151.9	1148.1	1164.3	1158.4	1192.8	1155.1	1072.7	1023.9	1000.7	1052	854.3	935.1
Q9VFT4	AT27578p OS=Drosophila melanogaster OX=7227 GN=rin PE=1 SV=1	0.827	1.015	0.815	1.054	0.872	1.07	1.82956e-07	0.99685	1.46859e-07	0.0538289	6.29622e-06	0.037373	13518	11179.3	13725.2	12824.7	1.35	1.5	3.22	3.13	1	24	148	24	42	74.9	7.37	0	203.085	13446.2	13298.2	13721.8	13590.3	11312.9	11179.3	11455.2	11076.2	11055.9	12931	13624.5	13826.7	13880.4	12427.8	12735.5	13390.9	12914.5	12335	12600.2
Q9VX39	Transmembrane protein 41 homolog OS=Drosophila melanogaster OX=7227 GN=stas PE=2 SV=2	0.312	1.153	0.271	1.131	0.353	1.305	1.83798e-07	0.657203	5.44018e-08	0.729091	5.97135e-07	0.172338	134.6	42	155.2	119	7.2	21.76	14.08	11.62	1	1	2	1	3	35.8	9	0	5.563	143.1	128.1	141.4	123.7	35.2	37.7	59.5	43.7	42	168.1	171.4	126.2	143.3	128.8	136.2	107.8	109.9	131.3	121.4
Q9Y137	BcDNA.GH07066 OS=Drosophila melanogaster OX=7227 GN=mino PE=1 SV=1	0.842	0.882	0.955	1.019	0.858	0.898	1.90747e-07	1.17884e-05	0.040899	0.588321	8.30277e-07	7.45318e-05	3289.8	2769.7	2900.7	3228.9	0.79	3.52	1.94	0.53	1	22	41	22	25	95.1	7.62	0	132.008	3270.7	3309.1	3269.5	3319.9	2655.2	2855.2	2769.7	2893.4	2715.7	2978.1	2907.9	2893.6	2841.6	3205.2	3222.3	3235.6	3244.1	3000.4	3135.4
Q9VLP1	GEO08095p1 OS=Drosophila melanogaster OX=7227 GN=Dmel\CG14275 PE=1 SV=1	1.923	1.096	1.755	0.945	1.817	1.036	1.91268e-07	0.616814	7.85526e-07	0.702453	6.59142e-07	0.998809	83.8	161.2	91.8	88.7	5.77	10.77	3.69	8.91	1	2	3	2	8	16.2	5.82	0	14.903	83.3	80.2	91.7	84.3	166.6	132.7	161.2	159.4	179.9	86.4	94.3	91.4	92.3	83.2	101.6	91.3	86.2	76.4	76
Q9VH64	LD29322p OS=Drosophila melanogaster OX=7227 GN=Dmel\CG8507 PE=1 SV=1	1.233	1.005	1.227	1.027	1.266	1.032	1.9505e-07	0.999992	2.00906e-07	0.645735	5.63485e-08	0.629843	9616.3	11858.8	9662.4	9364.7	3.18	3.26	2.69	1.24	1	19	80	19	49	44.6	8.15	0	107.414	9427.4	9824.7	9809	9202.3	11858.8	12163.4	11698.8	11279.8	12239.8	9763.6	9676.2	9191.2	9648.7	9338.9	9455.9	9183.3	9390.7	8648.3	9309
Q9W228	RE07815p OS=Drosophila melanogaster OX=7227 GN=Ugt317A1 PE=1 SV=3	0.764	0.869	0.879	1.172	0.895	1.019	1.9542e-07	0.000132308	0.00181547	0.000258517	0.000841408	0.973885	1769.2	1351.2	1537.1	1509.2	4.57	1.3	3.17	4.54	1	12	16	12	28	59.1	7.25	0	54.63	1865.6	1830	1710.4	1708.4	1350.8	1351.2	1336.5	1369.2	1381.7	1544.1	1448.7	1530.2	1554.5	1638.9	1486.1	1513.6	1504.9	1711.4	1733.9
Q7KMM4	Glucosidase II subunit alpha OS=Drosophila melanogaster OX=7227 GN=GCS2alpha PE=1 SV=1	1.235	0.88	1.403	1.063	1.313	0.936	1.9848e-07	6.92502e-05	5.7588e-10	0.0331388	8.77537e-09	0.0149357	14221	17568.8	12518.4	13380.6	1.01	3.81	1.23	2.75	1	43	130	43	48	105.7	6.51	0	231.263	14053.9	14223.5	14407.1	14218.4	16887.8	17568.8	18240.7	16569.8	17663.7	12762.9	12444.5	12592.7	12432.8	13050.7	13878.4	13553	13210.4	12892.5	13477
Q7K010	Tetraspanin OS=Drosophila melanogaster OX=7227 GN=Tsp42Ef PE=2 SV=1	1.536	1.879	0.818	0.614	0.944	1.154	2.02947e-07	3.35091e-09	0.000592063	8.59492e-08	0.456454	0.0123624	119	182.8	223.6	193.7	1.64	4.99	5.39	8.08	1	2	6	1	8	24.7	5.86	0	9.983	116.9	117.5	120.6	120.5	191.4	167.2	181.8	186.5	182.8	216.6	234.3	230.9	208.8	195.8	210.8	173	191.7	107.2	111.4
Q7KTG0	LD45607p OS=Drosophila melanogaster OX=7227 GN=CG31879 PE=1 SV=1	0.696	0.868	0.801	1.019	0.709	0.885	2.04998e-07	0.00695983	3.7768e-05	0.999998	2.00982e-07	0.0067348	2988.6	2078.9	2594.5	2932.2	4.94	6.34	1.77	1.08	1	16	36	16	31	64.3	7.44	0	93.434	3039	2939	2733.1	3042.8	2037.8	2140.6	2078.9	2324.1	1973	2614.2	2650.5	2544.8	2575	2904.5	2931.1	2981	2933.3	2787.8	2784.8
O18333	Ras-related protein Rab-2 OS=Drosophila melanogaster OX=7227 GN=Rab2 PE=1 SV=1	0.902	0.915	0.986	1.078	0.973	0.987	2.0547e-07	3.33979e-06	0.252644	2.02225e-05	0.022094	0.546455	2949.5	2661.9	2698.5	2735.1	1.35	1.53	0.89	1.5	1	14	37	14	71	23.5	6.39	0	84.096	2960	2985.1	2939.1	2891.7	2659.7	2583.6	2689.2	2670.5	2661.9	2711.9	2685.3	2728.9	2676.5	2694.6	2761.7	2779.8	2708.7	2715.4	2828.4
Q9VJ44	propanoyl-CoA C-acyltransferase OS=Drosophila melanogaster OX=7227 GN=Dmel\CG17597 PE=1 SV=2	0.75	0.724	1.036	1.026	0.77	0.743	2.14472e-07	1.57435e-07	0.789098	0.315614	1.801e-06	1.12411e-06	262.2	196.7	189.8	255.5	5.28	1.75	4.64	4.62	1	14	36	5	47	43.9	7.4	0	89.456	260.8	263.2	261.2	290	197.8	196.7	196.4	199.9	190.7	192.9	186.8	182.9	203.3	265.3	246.2	243.5	265.1	239.2	249.4
Q8T0D4	Protein tantalus OS=Drosophila melanogaster OX=7227 GN=tant PE=1 SV=1	1.251	1.037	1.206	1.003	1.254	1.04	2.16003e-07	0.286106	1.9852e-06	1	2.16594e-07	0.28712	608.7	761.3	631.2	607	2.81	2.98	2.14	2.85	1	2	5	2	6	33.7	6.81	0	16.063	599.1	592.3	618.5	629.4	764.4	739.9	773.8	718.1	761.3	649.4	627.4	635.1	617.3	601.3	612.9	592.5	632.7	549.6	561.2
Q7K0S5	GDI interacting protein 3, isoform B OS=Drosophila melanogaster OX=7227 GN=Gint3 PE=1 SV=1	1.16	1.064	1.09	0.969	1.124	1.031	2.27771e-07	0.00310651	8.88423e-05	0.197948	2.91042e-06	0.137516	4376.2	5075	4654.6	4514	0.85	2.8	1.33	2.51	1	21	54	21	48	50	7.11	0	122.532	4359.8	4409.8	4392.6	4326	5361.6	4979.7	5073.8	5139.9	5075	4682.9	4626.4	4753.9	4621	4533.5	4494.5	4373.6	4647.7	3999.5	4178.3
Q9V6U9	Enoyl-[acyl-carrier-protein] reductase, mitochondrial OS=Drosophila melanogaster OX=7227 GN=CG16935 PE=3 SV=2	1.158	1.142	1.013	0.962	1.114	1.099	2.29306e-07	9.15342e-07	0.888195	0.119489	4.44761e-06	2.02252e-05	4689.4	5428.6	5357.4	4874.3	1.65	1.5	0.84	2.77	1	18	50	18	58	39.1	9.11	0	104.754	4648.4	4802.6	4730.8	4637	5428.6	5382.9	5430.4	5265	5477.4	5396	5287.9	5352.6	5362.2	4840.4	4908.5	4675.9	4992.8	4264.2	4550.5
Q7JZE1	Peroxin 11 OS=Drosophila melanogaster OX=7227 GN=Pex11ab PE=1 SV=1	0.799	0.901	0.888	0.895	0.715	0.806	2.3151e-07	0.0014288	0.000187775	0.000567609	1.55966e-09	6.42911e-07	925.8	740.1	833.7	1034.8	1.24	2.46	3.87	3.1	1	7	13	7	28	27.1	9.66	0	31.616	914	926.6	925.1	942	739.7	740.1	758.6	779.2	734.8	830.8	811.8	888	836.7	1050.5	1019.3	994	1065.6	838.5	877.9
A8JUW4	Lethal (1) G0469, isoform C OS=Drosophila melanogaster OX=7227 GN=l(1)G0469 PE=4 SV=2	0.66	0.827	0.798	1.049	0.692	0.867	2.3625e-07	0.00246218	0.000115907	0.944723	4.40054e-07	0.00662596	70.1	46.3	58	66.9	1.53	7.17	5.91	7.17	1	2	2	2	6	37.6	9.03	0	5.544	70.5	69.8	69.5	71.9	40.4	46.4	48.3	46.3	42.7	61.7	56.2	54.2	59.9	65.6	76.2	66.3	67.5	64.7	66.1
Q9VJ10	FAD-dependent oxidoreductase domain-containing protein 1 OS=Drosophila melanogaster OX=7227 GN=l(2)37Bb PE=1 SV=1	0.875	1.069	0.818	0.895	0.784	0.958	2.37623e-07	0.0024663	3.02095e-09	2.76009e-05	4.27535e-10	0.0641516	1944.4	1701.5	2079.3	2171.4	2.67	1.59	1.02	1.74	1	12	20	12	21	56.7	6.84	0	61.404	2031	1963.4	1915.7	1925.6	1741	1692.3	1701.5	1722.4	1670.7	2065.4	2055.9	2093.2	2099.5	2168.3	2099.3	2174.6	2178.6	1863.2	1860.4
Q9VZ82	leucine--tRNA ligase OS=Drosophila melanogaster OX=7227 GN=LeuRS-m PE=1 SV=1	0.874	0.804	1.088	1.053	0.921	0.847	2.44086e-07	1.62846e-09	8.29198e-05	0.00637148	5.20771e-05	4.6821e-08	2242.9	1961	1803	2129.2	2.27	1.63	1.99	1.2	1	22	35	22	34	99.2	8.05	0	110.936	2271.5	2307.4	2197	2214.7	1926.9	1996.5	1961	1992.1	1933.9	1783.1	1780.8	1856.3	1823	2108.1	2131.8	2169.2	2126.5	2083.8	2186.3
Q9VYX8	LD04844p OS=Drosophila melanogaster OX=7227 GN=Dmel\CG1572 PE=1 SV=1	1.637	1.129	1.45	1.046	1.712	1.181	2.45384e-07	0.0630895	8.05951e-06	0.99657	1.94838e-07	0.0434513	433.5	709.6	489.4	414.5	4.28	8.02	6.15	5.78	1	2	7	2	16	17.8	9.01	0	11.459	400.5	439.9	438.4	428.6	731.8	613.6	663.7	709.6	751.8	448.8	473.1	512.7	506.2	411.1	458.8	404.4	417.8	367.4	416.9
Q8I7C3	LIM and SH3 domain protein Lasp OS=Drosophila melanogaster OX=7227 GN=Lasp PE=1 SV=2	1.168	0.918	1.272	1.046	1.221	0.96	2.50018e-07	8.44542e-05	7.20064e-10	0.0228432	8.81314e-09	0.0275479	3706.6	4328.2	3402.8	3544.9	1.73	2.37	1.74	1.5	1	17	43	17	33	74.2	7.88	0	116.137	3629.8	3675.5	3773.6	3738	4370.3	4328.2	4136.3	4210.8	4353.1	3433.6	3422.8	3303.4	3382.8	3596.9	3543.7	3468.4	3546.2	3329.9	3482.6
Q94883	DNA replication-related element factor, isoform A OS=Drosophila melanogaster OX=7227 GN=Dref PE=1 SV=2	0.804	0.96	0.838	1.067	0.858	1.024	2.59219e-07	0.45337	1.56853e-06	0.0701113	7.93928e-06	0.624462	3070.5	2469.9	2948.3	2878.4	3.58	2.53	2.41	1.27	1	23	50	23	38	80.7	5.86	0	127.482	3092.7	3087.8	2864.4	3053.3	2536.8	2448	2417.4	2569.3	2469.9	2852.5	2916.3	2980.6	3012	2827.7	2914	2889.3	2867.6	2837.1	2925.7
Q4V4H7	IP04046p OS=Drosophila melanogaster OX=7227 GN=Dmel\CG13323 PE=2 SV=1	1.71	1.614	1.059	0.794	1.358	1.282	2.61088e-07	4.29418e-06	0.259903	0.00847248	4.4836e-05	0.00156283	243.1	415.6	392.4	306.2	6.09	10.55	2.35	8.07	1	2	2	2	14	12.5	9.99	0	7.682	261	225	241	245.2	400.5	415.6	492.6	472	388.8	391.7	393	400.7	378.5	324.1	311.3	267.4	301.1	239.5	213.2
M9PFV8	Regeneration, isoform B OS=Drosophila melanogaster OX=7227 GN=rgn PE=1 SV=1	1.898	0.772	2.459	1.049	1.991	0.81	2.6778e-07	0.00552169	4.75111e-09	0.979102	1.74567e-07	0.0112176	3536.6	6711.3	2729.4	3371.3	3.22	10.94	5.05	13.43	1	30	55	30	28	98.2	9.22	0	118.045	3668.2	3529.3	3390.5	3543.8	7073.3	6615.6	6711.3	6274.1	8255.4	2550.6	2642.5	2830.3	2819.1	4089.6	3539.4	3211.2	3028.9	3365.1	3344.1
A0A0B4KEH1	Uncharacterized protein, isoform B OS=Drosophila melanogaster OX=7227 GN=FBXL9 PE=4 SV=1	0.53	0.474	1.117	0.643	0.341	0.305	2.79489e-07	1.36038e-07	0.558741	2.02372e-05	4.08076e-10	3.43756e-10	231.2	122.5	109.7	359.4	4.08	12.98	7.14	5.51	1	3	3	3	5	79.9	6.89	0	5.686	234.8	234.9	227.7	215.1	106.5	100.8	134.3	122.5	134.3	104.1	102.8	115.7	118.1	394	362.2	356.7	347.7	215.4	222.6
M9NFH8	glutamate synthase (NADH) OS=Drosophila melanogaster OX=7227 GN=GS PE=1 SV=1	0.839	1.153	0.728	0.814	0.682	0.938	2.83114e-07	2.33912e-06	1.45226e-10	3.18418e-08	1.27083e-11	0.00641381	26191.8	21963.5	30187.9	32189.2	0.95	3.36	2.07	1.41	1	90	292	90	49	232.1	6.42	0	564.36	26276.6	26139.7	25738.2	26244	21963.5	21322.5	22481.3	23116.7	21463.5	31029.3	29621.6	30481.9	29896.8	31879.2	32407	31972.9	32872.1	24105	24767.7
Q7JXC6	LD27256p OS=Drosophila melanogaster OX=7227 GN=Dmel\CG8237 PE=2 SV=1	0.588	0.643	0.916	0.756	0.445	0.486	3.00456e-07	2.54064e-06	0.540865	0.000504601	1.75776e-09	9.35086e-09	416.2	244.9	267.5	550.7	6.02	10.84	6.05	1.74	1	6	8	6	20	36.6	5.35	0	22.249	450	422.5	389.7	410	244.9	245.8	231.5	290.1	219.6	239.9	274.2	273	262.1	553.7	547.7	565.2	542.9	412.8	400.3
Q9VMU5	Protein quick-to-court OS=Drosophila melanogaster OX=7227 GN=qtc PE=2 SV=2	0.769	0.829	0.928	1.008	0.776	0.836	3.03987e-07	4.72656e-05	0.0140192	0.955974	5.43986e-07	0.000101607	562.9	433	466.8	558.3	2.25	3.64	4.25	3.87	1	10	14	10	17	80	6.68	0	37.644	572.7	571.1	546.8	554.8	447.2	425.1	439.2	433	406.2	494.8	476.1	450.2	457.6	527.8	546	570.9	572.6	525.3	541.1
Q9VLU2	RE08173p OS=Drosophila melanogaster OX=7227 GN=Tg PE=2 SV=2	1.575	1.152	1.368	1.061	1.67	1.221	3.05191e-07	0.00886367	5.36245e-05	0.846784	1.25515e-07	0.00204987	4017.3	6328	4627.1	3788.1	4.08	7.34	6.25	4.96	1	23	52	23	31	87.2	5.92	0	99.06	4036.5	3998.2	4041.3	3705.8	6513.1	5466.5	5953.8	6328	6534.7	4331.3	4628.6	5039	4625.6	4062.7	3748.2	3611.3	3828.5	3702.9	3788.4
Q9VLN0	Mitochondrial ribosome-associated GTPase 2 OS=Drosophila melanogaster OX=7227 GN=Dmel\CG13390 PE=3 SV=1	0.895	0.985	0.909	0.971	0.87	0.957	3.21908e-07	0.490728	1.83782e-06	0.0436993	1.49657e-08	0.00312288	1238.1	1108.7	1219.7	1274.7	1.33	2.06	0.98	0.58	1	9	20	9	28	41.4	9.39	0	36.637	1227.4	1248.9	1255.5	1221.4	1147.8	1106.7	1108.7	1127.9	1087.4	1234.1	1226.3	1213.2	1207.9	1276.3	1268.8	1286.4	1273.2	1126	1183.4
Q960W6	Putative fatty acyl-CoA reductase CG8306 OS=Drosophila melanogaster OX=7227 GN=CG8306 PE=2 SV=1	0.833	1.046	0.797	0.933	0.778	0.976	3.34988e-07	0.0576626	1.78744e-08	0.00584833	5.77369e-09	0.601803	1316.1	1096.7	1376.6	1410.3	3.34	2.32	0.28	2.75	1	9	13	8	18	58.4	9.32	0	42.371	1303.6	1354.8	1328.7	1252.1	1097.1	1122.1	1096.7	1052	1095.9	1371	1375.5	1380	1377.7	1400.8	1449.9	1357.5	1419.8	1195.9	1283.7
Q9VTU4	Eukaryotic translation initiation factor 3 subunit L OS=Drosophila melanogaster OX=7227 GN=eIF3l PE=2 SV=1	0.897	1.004	0.894	1	0.897	1.004	3.37258e-07	0.953076	1.89534e-07	0.942912	1.8178e-07	0.999979	6712.7	6022.6	6737.6	6710.8	1.43	1.5	1.16	1.29	1	16	62	16	34	63.2	5.96	0	103.428	6759.4	6592.7	6666.3	6807	6022.6	6007.8	6113.8	6210.5	5997.4	6659.1	6786.2	6824.1	6689.3	6693	6728.7	6868.8	6678.5	6200.8	6246.7
Q9VL60	RE01590p OS=Drosophila melanogaster OX=7227 GN=Dmel\CG13126 PE=1 SV=1	0.874	0.999	0.875	1.043	0.912	1.042	3.38239e-07	0.851146	8.67454e-07	0.0126719	4.55404e-05	0.0544889	2471.3	2160	2468.8	2369.3	3.02	1.09	1.45	2.31	1	16	24	16	32	53.7	8.69	0	76.381	2470.9	2609.2	2440.4	2471.7	2164	2169.1	2151.5	2160	2110.9	2485.9	2428.2	2451.7	2508.9	2402.3	2336.8	2425.9	2309.2	2266.7	2472.2
Q7YU81	Protein charlatan OS=Drosophila melanogaster OX=7227 GN=chn PE=1 SV=3	1.746	1.15	1.519	0.472	0.825	0.543	3.38987e-07	0.0776002	1.02421e-05	1.70418e-08	0.00980154	2.24538e-07	387.1	676	445.1	819.7	4.17	7.64	3.85	11.09	1	5	7	5	4	130.2	9.29	0	9.837	379.8	370.7	394.6	407.4	659.3	676	678	738.5	595.4	445.6	469.2	427.4	444.7	767.3	897	875.7	707	348.4	351.3
Q9VSL5	Glutathione S transferase O2, isoform A OS=Drosophila melanogaster OX=7227 GN=GstO2 PE=1 SV=2	1.447	0.796	1.818	1.072	1.551	0.853	3.3947e-07	0.000104917	9.50845e-10	0.449973	6.60014e-08	0.0012902	2726.9	3946.6	2171.2	2544.1	1.51	5.46	5.75	5.82	1	9	18	9	31	29.1	7.56	0	39.571	2665.6	2749.7	2704.3	2751.6	4064.6	3946.6	3778.6	4192.2	3658.1	2260.7	2275	2027.7	2085.2	2779.6	2599.7	2489.6	2441.8	2445.3	2605.4
P19351	Troponin T, skeletal muscle OS=Drosophila melanogaster OX=7227 GN=up PE=1 SV=3	2.733	0.886	3.086	0.912	2.492	0.808	3.40791e-07	0.595256	8.61004e-08	0.476618	2.02443e-06	0.0692394	3273.2	8945.7	2899	3590.1	9.88	13.25	10.25	16.26	1	17	44	17	38	47.4	4.64	0	70.92	3360.8	3667.5	3188	2893.2	9062	9152.3	8945.7	6503.9	8906.3	2593.7	3038.9	3271.7	2765.6	4661.2	3643.2	3537.7	3254.3	3083	3475
P83967	Actin, indirect flight muscle OS=Drosophila melanogaster OX=7227 GN=Act88F PE=1 SV=1	1.467	0.991	1.48	0.89	1.306	0.882	3.41288e-07	0.734367	1.1071e-07	0.096557	8.63242e-06	0.0152346	463.2	679.5	459.2	520.4	3.76	7.18	4.26	3.78	1	22	174	5	65	41.7	5.48	0	147.827	456.4	495.1	467.2	459.3	720.6	671.1	679.5	620.2	749.1	424.2	454.7	463.8	465.9	525.5	515.3	533.5	488.8	418.7	469.1
Q7K1U0	Activity-regulated cytoskeleton associated protein 1 OS=Drosophila melanogaster OX=7227 GN=Arc1 PE=1 SV=1	1.938	0.931	2.083	0.786	1.525	0.732	3.42055e-07	0.545397	7.90986e-08	0.00496701	0.000104893	0.000466675	1668.7	3234.6	1553.1	2121.7	1.03	14.14	2.65	3.37	1	12	29	12	50	28.9	6.47	0	60.912	1673.8	1646.4	1663.5	1687.1	2748.4	3234.6	3553.4	3416.7	2534.9	1571.7	1563.1	1481.3	1543.3	2097.4	2146.3	2071.6	2235.3	1535.5	1560
P82147	Protein lethal(2)essential for life OS=Drosophila melanogaster OX=7227 GN=l(2)efl PE=1 SV=1	1.476	1.144	1.289	0.908	1.34	1.039	3.45142e-07	0.0380237	1.87626e-05	0.166559	5.54302e-06	0.825619	1093.3	1613.4	1251.3	1203.9	2.68	6.86	3.54	5.31	1	9	15	9	59	21.3	6.21	0	43.057	1108.7	1139.2	1078.1	1077.1	1613.4	1432.7	1595.9	1663.5	1729.2	1166.6	1251.4	1251.2	1258.2	1245.1	1249.6	1164.1	1120	1017.1	1079.4
Q8SX37	CDP-diacylglycerol--inositol 3-phosphatidyltransferase OS=Drosophila melanogaster OX=7227 GN=Pis PE=1 SV=1	1.261	0.804	1.568	0.957	1.207	0.77	3.56924e-07	7.57032e-07	9.02657e-11	0.305916	3.3478e-06	1.0891e-07	600.3	756.8	482.8	627	2.83	3.94	3.13	2.77	1	3	7	3	11	25.5	8	0	14.115	605.3	628.5	595.3	589.7	743.4	756.8	748.5	818.2	762.9	457.5	480.9	484.8	492.3	654.5	613.3	630.1	623.9	555.3	595.5
Q9VK85	Eukaryotic peptide chain release factor GTP-binding subunit OS=Drosophila melanogaster OX=7227 GN=eRF3 PE=1 SV=1	0.864	0.965	0.896	1.028	0.889	0.992	3.62544e-07	0.0782898	1.10615e-05	0.278758	3.72004e-06	0.85768	15624	13506	15070.5	15193.7	1.89	1.87	1.16	2.48	1	27	123	27	44	66.4	5.35	0	188.157	15808.1	15246.2	15442	15859.6	13669.6	13506	13353.9	13958	13356.5	14993.3	15193.5	15148.1	14806.9	14914.5	15478.1	15567.1	14835.9	14501.7	14446
P91682	Protein smoothened OS=Drosophila melanogaster OX=7227 GN=smo PE=1 SV=1	1.697	0.983	1.727	1.098	1.862	1.079	3.63013e-07	0.986843	2.50036e-07	0.393968	6.28255e-08	0.576555	57.6	97.8	56.6	52.5	6.08	9.34	5.58	5.75	1	2	3	2	1	116.5	8.76	0.001	3.269	60.7	54.8	60.6	54.3	96	109.1	99.6	83.8	97.8	57	56.3	52.8	60.5	53.9	51.1	50.1	56.9	55.7	52
Q9VQ57	Derlin-1 OS=Drosophila melanogaster OX=7227 GN=Der-1 PE=2 SV=1	0.595	0.536	1.112	1.001	0.596	0.536	3.63139e-07	4.5998e-08	0.0692548	0.990117	2.58905e-07	3.47314e-08	393	234	210.5	392.8	4.02	3.36	1.62	13.23	1	5	7	5	25	28.2	9.06	0	36.585	395.1	411.6	373.2	391	231.6	234	247.7	247	232.8	206.8	207.9	213.1	213.4	394.6	344.8	390.9	472.6	362.4	390
Q9VTE8	GEO08928p1 OS=Drosophila melanogaster OX=7227 GN=Irbp18 PE=1 SV=1	1.441	0.88	1.636	1.127	1.624	0.993	3.64322e-07	0.0139872	9.34875e-09	0.0346064	1.46852e-08	0.958277	259.8	374.3	228.7	230.4	3.52	4.7	2.44	7.72	1	5	8	5	46	13	9.11	0	22.341	274.4	252.6	261	258.6	396.7	357.9	357.9	388.6	374.3	228.1	225.7	238.5	229.4	240.2	258.3	220.1	221.1	251.7	239.4
Q9VKV4	Non-structural maintenance of chromosomes element 4 OS=Drosophila melanogaster OX=7227 GN=Nse4 PE=1 SV=2	0.71	1.085	0.654	1.034	0.734	1.122	3.74224e-07	0.511856	8.07787e-08	0.3316	3.27363e-06	0.0320596	413.4	293.5	448.6	399.9	5.75	4.84	3.12	5.23	1	9	13	9	31	33.1	5.15	0	42.817	410.4	416.5	408.3	459.9	317.6	281.7	309.5	293.5	291.8	452.8	424.6	444.6	455.2	421.6	390.1	409.9	374.6	376.5	394.7
Q7K3W2	Mitochondrial-processing peptidase subunit alpha OS=Drosophila melanogaster OX=7227 GN=Dmel\CG8728 PE=1 SV=1	0.904	1.008	0.897	1.026	0.927	1.034	3.77413e-07	0.996949	3.00344e-07	0.0552037	1.55087e-05	0.038493	5739.3	5186.5	5784.2	5593.2	1.01	0.25	1.12	2.57	1	20	60	20	47	61	7.12	0	128.933	5722.7	5838	5707.9	5756	5192.2	5163.8	5183.4	5186.5	5197.5	5826.8	5775.1	5676.9	5793.3	5413.9	5580.7	5764.7	5605.7	5249.8	5531.6
Q9VI16	Carnitine O-Acetyl-Transferase, isoform A OS=Drosophila melanogaster OX=7227 GN=CRAT PE=1 SV=2	0.881	0.904	0.974	1.118	0.985	1.011	3.77613e-07	1.25298e-05	0.116192	2.91267e-06	0.596979	0.684447	2460.7	2167.1	2224.7	2200.9	1.97	1.86	2.09	0.95	1	22	48	22	40	74.7	8.6	0	122.379	2444.6	2476.8	2535.6	2424.3	2167.1	2145.6	2124.6	2228.7	2189.9	2197.4	2198.7	2294.9	2251	2182.4	2206.5	2231.9	2195.4	2242.6	2346.8
Q8IRJ7	Dis3 like 3'-5' exoribonuclease 2, isoform C OS=Drosophila melanogaster OX=7227 GN=Dis3l2 PE=1 SV=1	0.867	0.964	0.899	1.024	0.888	0.987	3.91933e-07	0.186536	5.85452e-06	0.556865	1.9768e-06	0.844074	5506.7	4775	5308.6	5379.2	1.99	2.1	1.31	1.76	1	34	67	34	34	118.2	8.18	0	186.046	5558.4	5521.7	5313.5	5491.6	4709.7	4775	4705.7	4953.4	4801.1	5257.5	5403.1	5266.3	5351.1	5485.7	5262.8	5346.9	5411.7	5099	5231.9
E8NHA2	HECT and RLD domain containing E3 ubiquitin ligase 4, isoform C OS=Drosophila melanogaster OX=7227 GN=Herc4 PE=1 SV=1	1.14	0.975	1.17	1.015	1.158	0.99	4.01959e-07	0.208837	4.37958e-08	0.831648	1.57095e-07	0.614852	5271.5	6010.3	5137.7	5191.2	1.93	1.24	0.79	2.79	1	29	54	29	30	119.4	6.27	0	124.252	5149.2	5212.4	5366.6	5331.4	5942.4	6068.1	5906.9	6010.3	6073.7	5150.9	5068.7	5124.6	5158.6	5374.6	5096.8	5077.2	5287.4	4723.7	4938.8
Q9W1Q5	FI21439p1 OS=Drosophila melanogaster OX=7227 GN=Dmel\CG3520 PE=2 SV=2	0.819	0.755	1.086	1.305	1.069	0.985	4.03715e-07	1.41458e-08	0.0048719	5.06617e-08	0.0704733	0.520979	1483.6	1215.6	1119.8	1137	2.22	3.25	1.78	3.4	1	21	26	21	21	137	6.39	0	73.431	1454.5	1519.3	1507.9	1459.8	1157.3	1215.6	1230	1207.1	1266.1	1133.2	1106.5	1146.1	1106.1	1134.1	1140	1131.3	1213.3	1334.3	1439.6
Q9VLF6	UPF0585 protein CG18661 OS=Drosophila melanogaster OX=7227 GN=CG18661 PE=2 SV=2	0.762	0.963	0.792	1.288	0.982	1.241	4.10189e-07	0.899142	9.2653e-07	4.38112e-06	0.446577	1.08508e-05	755.3	575.9	727.2	586.2	3.71	4.82	1.65	3.43	1	6	11	6	34	24.9	8.84	0	38.162	764.2	753.7	703.7	756.8	578	606.9	533.1	555.9	575.9	720.9	727.6	726.8	748.5	593.4	579	575.1	619.9	701.1	714.2
P18432	Myosin regulatory light chain 2 OS=Drosophila melanogaster OX=7227 GN=Mlc2 PE=1 SV=2	2.183	0.69	3.163	1.103	2.409	0.762	4.11859e-07	0.00188479	3.95785e-09	0.999871	3.80191e-07	0.00213176	2948.1	6437.1	2035.4	2672	7.8	10.66	10.13	15.89	1	12	48	12	64	23.7	4.81	0	69.968	3077.8	2915	2981.4	2562	6764.2	6061.7	6437.1	5692.2	7499.1	1695.4	2042.4	2163.6	2028.5	3572.1	2628.3	2637.6	2706.9	2823.5	2762
Q9VY78	Chloride intracellular channel Clic OS=Drosophila melanogaster OX=7227 GN=Clic PE=1 SV=1	0.839	0.979	0.857	1.024	0.859	1.002	4.18928e-07	0.601267	1.932e-06	0.718148	1.49824e-06	0.996979	2143.9	1798.7	2098.3	2094.6	2.2	3.16	0.68	2.36	1	10	21	10	45	30.2	6.29	0	53.787	2170.6	2193.3	2090.5	2117.5	1840.8	1798.7	1748.2	1889.8	1767	2082.9	2089.6	2112.9	2107.1	2061.8	2170.8	2117	2072.4	1991.3	2078.2
Q9W226	GEO07239p1 OS=Drosophila melanogaster OX=7227 GN=Dmel\CG30195 PE=2 SV=2	1.83	0.965	1.895	1.051	1.923	1.015	4.25251e-07	0.988507	2.96703e-07	0.941503	2.25739e-07	0.994527	109.6	200.6	105.8	104.3	4.69	5.41	6.81	14.52	1	2	3	2	10	17.4	9.11	0	7.779	114.5	102.8	111.8	107.5	212.8	186.9	200.6	197.3	212.5	106.6	99.8	117.2	105	123.6	114.8	94.8	91.8	105	97.4
Q7K527	Tetraspanin OS=Drosophila melanogaster OX=7227 GN=Tsp42El PE=1 SV=1	1.742	1.355	1.286	0.696	1.212	0.942	4.33978e-07	0.000219037	0.00379277	4.14262e-05	0.0303717	0.704491	53.8	93.7	72.9	77.4	5.06	9.44	7.5	1.85	1	1	2	1	5	24.3	6.92	0	4.232	57.7	52.2	55.5	51.9	98.3	76.3	89.1	94.6	93.7	68.4	79.4	76.8	69.2	78.8	76.3	78.5	76	52.9	49.5
Q9VNA3	GH21273p OS=Drosophila melanogaster OX=7227 GN=BEST:LD29996 PE=1 SV=1	1.27	0.993	1.279	1.062	1.348	1.054	4.36969e-07	0.931083	2.22892e-07	0.0322836	1.64169e-08	0.092912	1758.4	2232.4	1745.3	1656.4	1.94	1.85	4.05	4.49	1	10	23	10	52	23.6	6.8	0	47.565	1758.1	1796.3	1758.7	1712.9	2159	2266.5	2201	2238.9	2232.4	1732	1638	1804.5	1758.6	1529.9	1680.1	1690.7	1633.1	1612.8	1702
Q9VI83	G patch domain-containing protein 11 OS=Drosophila melanogaster OX=7227 GN=Dmel\CG10053 PE=2 SV=2	1.326	1.252	1.059	1.24	1.644	1.552	4.37633e-07	8.63412e-06	0.229473	2.93971e-05	6.23935e-10	4.564e-09	150.3	199.3	188.2	121.2	5.83	2.02	2.07	5.46	1	3	3	3	14	30	5.8	0	9.755	154.9	153.5	136	147.1	195	205	202	199.3	196.7	184.8	190.4	193.1	185.9	122.6	109.5	119.8	123.7	142.1	145.5
Q9VHN4	GH14121p OS=Drosophila melanogaster OX=7227 GN=Dmel\CG8043 PE=1 SV=1	0.837	0.832	1.006	0.983	0.823	0.818	4.3964e-07	3.61078e-07	0.866782	0.999684	4.90358e-07	3.99913e-07	1002.2	839	833.6	1019.5	2.4	3.16	1.92	2.33	1	10	17	10	36	39.5	8.68	0	46.877	1005.7	998.8	998.1	1048.9	839	859.9	816.3	881.3	823.8	814.4	842.2	849.6	825.2	1029	976.5	1020.8	1018.2	922.5	946.4
Q9VQ79	Putative apoptosis-inducing factor 1, mitochondrial OS=Drosophila melanogaster OX=7227 GN=AIF PE=2 SV=2	0.872	0.979	0.891	0.957	0.835	0.937	4.47172e-07	0.293138	4.53409e-06	0.103851	3.14243e-08	0.00368992	7002.4	6108.4	6855.2	7319.5	1.5	1.35	0.89	3.15	1	23	56	23	27	81.2	6.2	0	113.995	7182.5	7020.2	6941.5	6984.8	6052.7	6108.4	6189.9	6098.8	6261.9	6817.7	6800.3	6928.3	6893	7184.8	7456.7	7465.2	6991.7	6588.9	6651.7
Q8SX32	Arginine methyltransferase 8 OS=Drosophila melanogaster OX=7227 GN=Art8 PE=1 SV=1	1.235	1.239	0.997	0.89	1.099	1.102	4.66219e-07	2.7014e-06	0.74553	0.00115282	0.000679411	0.00595583	929.3	1147.7	1150.9	1044	2.32	4.99	3.28	0.49	1	5	15	5	18	38.5	4.92	0	29.07	900.9	923.2	952.1	935.3	1147.7	1201.3	1135.6	1136.9	1272.2	1144.7	1106.6	1198.2	1157.2	1051.3	1046.3	1039.9	1041.8	826.5	874.8
Q7KVW1	RE73736p OS=Drosophila melanogaster OX=7227 GN=spoon PE=1 SV=1	0.822	0.924	0.889	0.994	0.817	0.919	4.86497e-07	0.0106104	8.7687e-05	0.967433	2.89367e-07	0.00463969	3646.5	2998	3371	3669.8	2.69	4.09	2.08	0.9	1	16	41	16	31	67.3	6.79	0	90.58	3741.7	3689.8	3519	3603.7	3112.7	2889.7	2814.9	2998	3057.1	3287.5	3358.6	3383.4	3457.5	3686.4	3653.2	3635.5	3709	3432.5	3496.2
Q9VZF1	GH07444p OS=Drosophila melanogaster OX=7227 GN=Dmel\CG1309 PE=1 SV=1	1.135	0.908	1.25	0.97	1.101	0.881	4.92295e-07	1.29509e-05	4.56294e-10	0.184718	7.7624e-06	8.61318e-07	4167.7	4731.5	3784.7	4295.9	1.73	1.86	1.45	2.15	1	19	48	19	35	58.4	8.21	0	100.866	4088.8	4137.1	4254.2	4198.6	4731.5	4658.8	4826.1	4844.8	4662	3806.1	3795.7	3686.3	3773.8	4177.4	4343.7	4248.7	4380.3	3750.9	3920
Q9W590	Large subunit GTPase 1 homolog OS=Drosophila melanogaster OX=7227 GN=Ns3 PE=1 SV=1	0.882	0.946	0.932	1.025	0.904	0.97	4.95157e-07	0.00285897	0.000300832	0.329865	4.55195e-06	0.0701572	5580.8	4923.9	5281.9	5446.9	1.04	2.53	1.22	1.14	1	27	65	27	49	70.2	7.68	0	147.94	5612.5	5549.3	5495	5617.4	4869.6	4928.2	4844.3	5159.1	4923.9	5198.6	5352.7	5265.3	5298.5	5534	5456.2	5384.3	5437.7	5148.6	5258.1
P26016	Furin-like protease 1, isoforms 1/1-X/2 OS=Drosophila melanogaster OX=7227 GN=Fur1 PE=2 SV=2	1.298	1.058	1.227	0.973	1.263	1.029	4.9592e-07	0.340553	4.41769e-06	0.727629	1.76313e-06	0.894253	800.5	1039.2	847	823.1	1.66	3.92	5.28	2.65	1	12	16	12	10	138.5	9.32	0	49.855	797.6	795.2	824.5	803.3	1039.2	1011.4	1097.5	1001.5	1074.8	883.8	817.1	794.1	877.9	808.5	835.6	810.7	854.6	731.7	753.5
Q6NL44	GH28815p OS=Drosophila melanogaster OX=7227 GN=Dmel\CG33722 PE=1 SV=1	1.161	1.252	0.927	1.036	1.203	1.297	5.01223e-07	5.07143e-09	0.000369116	0.414832	8.72781e-08	1.55424e-09	3297.2	3827.5	4126.9	3181.7	2.95	1.3	1.37	2.44	1	21	51	21	51	53.6	7.05	0	128.546	3145.5	3303.9	3290.6	3376.4	3724.1	3836.1	3839.4	3827.5	3778.6	4106.7	4042.6	4171.7	4147.2	3194.7	3168.7	3133.4	3313.3	2885.6	3130.4
Q9VCH9	LD07883p OS=Drosophila melanogaster OX=7227 GN=Dmel\CG10375 PE=1 SV=1	1.238	1.069	1.158	0.994	1.23	1.063	5.11711e-07	0.0184582	5.79831e-05	0.752223	1.72483e-06	0.109243	2070.4	2562.5	2213.7	2083	1.36	1.95	2.05	5.42	1	17	29	17	61	30.3	9.03	0	85.205	2064.2	2087	2023.1	2076.5	2480.6	2563.4	2560.5	2562.5	2620.2	2193.6	2182.1	2282.7	2234.1	2012.2	2139.2	2258.7	2028.2	1893.6	1977.5
Q9VR44	GH05102p OS=Drosophila melanogaster OX=7227 GN=CT10168 PE=1 SV=1	0.652	0.702	0.929	1.045	0.681	0.733	5.19745e-07	5.15062e-06	0.491863	0.789643	1.60604e-06	1.79438e-05	666.3	434.5	467.6	637.8	1.15	5.79	3.75	9.33	1	5	7	5	8	53.9	8.66	0	24.033	659.1	660.7	674.1	672	421.4	421.2	480.4	434.5	457.8	455.2	486.5	451.6	480.3	608.1	715.3	668.9	582.1	604.6	626
P05661	Myosin heavy chain, muscle OS=Drosophila melanogaster OX=7227 GN=Mhc PE=1 SV=4	2.321	0.863	2.691	0.821	1.905	0.708	5.30743e-07	0.3468	7.95807e-08	0.0315847	3.84513e-05	0.00138779	18766.6	43563.9	16191	22867.1	7.68	10.04	5.99	22.5	1	104	263	104	46	224.3	6.21	0	605.619	20166.4	19779.5	17247.7	17805.6	46700.3	43563.9	39417.9	42771.4	51322.6	14992.6	15636.5	17056.9	16765.3	33483.7	23408.6	21225.4	22338.2	18499.8	18741.3
Q9VHC3	Blistery, isoform A OS=Drosophila melanogaster OX=7227 GN=by PE=2 SV=1	1.332	0.99	1.345	1.029	1.371	1.019	5.35617e-07	0.981919	3.4956e-07	0.590413	1.28762e-07	0.799948	793.1	1056.3	785.1	770.5	1.72	5.08	2.19	4.77	1	12	20	12	21	79.4	8.94	0	59.512	787.7	795.8	817.9	790.4	1121.1	986.3	1008.8	1056.3	1072.6	775.8	778.6	813.8	791.7	814.9	758.1	728.3	783	722.6	754
Q7JZM8	Large ribosomal subunit protein mL41 OS=Drosophila melanogaster OX=7227 GN=mRpL41 PE=2 SV=1	1.495	1.201	1.244	0.806	1.204	0.968	5.45017e-07	0.0135122	8.28938e-05	0.00095858	0.00104864	0.475293	396.3	592.3	476.1	491.9	2.03	4.93	7.49	5.85	1	6	12	6	54	18.6	9.39	0	31.444	391.5	395	397.5	410.1	545.9	623.4	604.9	580.3	592.3	482.1	477.4	409.3	474.7	491	449.6	492.8	518.6	359.2	374.3
Q9VTG0	Phosphate transporter OS=Drosophila melanogaster OX=7227 GN=NaPi-III PE=2 SV=2	1.252	0.839	1.492	0.965	1.208	0.81	5.48753e-07	6.92149e-05	1.04968e-09	0.431058	3.88125e-06	7.58693e-06	772.2	966.9	648	800.2	3.46	3.02	2.25	4.97	1	9	17	9	12	71.8	6.81	0	41.75	726.8	786.9	766.8	777.6	1023.7	958.7	1000.9	956.7	966.9	642.2	653.9	658.1	625.7	811.2	744	789.3	837.4	666.7	745.6
M9NEB2	Myosin binding subunit, isoform O OS=Drosophila melanogaster OX=7227 GN=Mbs PE=1 SV=1	1.229	1.062	1.157	0.991	1.219	1.053	5.49898e-07	0.108018	1.41803e-05	0.959657	9.89575e-07	0.237001	3780.8	4647.7	4015.7	3814.1	0.59	2.82	2.9	3.58	1	34	57	34	28	137.3	6.23	0	169.83	3776.6	3748.7	3802.5	3784.9	4694.9	4482.4	4682.3	4409.8	4647.7	4038.5	3795.5	4032.1	3999.4	3977.5	3765.2	3657.9	3863.7	3464.5	3552
Q8T8S1	DCN1-like protein 3 OS=Drosophila melanogaster OX=7227 GN=SCCRO3 PE=2 SV=1	0.283	0.222	1.276	0.557	0.158	0.124	5.51069e-07	5.47082e-07	0.938002	0.00399466	6.9832e-09	8.4377e-09	28.7	8.1	6.4	51.5	12.61	19.92	25.98	12.5	1	2	2	2	5	38	4.77	0	6.814	28	23.4	29.4	31.9	6.8	5	8.4	8.2	8.1	5.5	7.3	5.3	9.1	57.7	54.3	48.8	43.2	25.7	22.2
Q01637	Uridine 5'-monophosphate synthase OS=Drosophila melanogaster OX=7227 GN=r-l PE=2 SV=2	0.888	0.956	0.928	1.006	0.893	0.962	5.54276e-07	0.0314507	4.08592e-05	0.991684	7.75699e-07	0.0523267	10908.6	9683	10432	10844.4	1.63	2.53	1.07	1.2	1	21	83	21	47	53.4	7.25	0	136.55	11057.8	10898	10919.2	10633.5	9683	9399.9	9277.2	9744.4	9853.8	10373.5	10336.3	10581.9	10490.9	10841.6	10847.2	10989.9	10672	10143.9	10326
E1JHB7	PDGF- and VEGF-receptor related, isoform J OS=Drosophila melanogaster OX=7227 GN=Pvr PE=1 SV=1	1.146	0.975	1.176	0.977	1.12	0.952	5.61515e-07	0.392325	9.21962e-08	0.265819	6.49921e-06	0.0160494	1830.2	2098.2	1783.5	1872.6	0.84	2.02	0.75	3.11	1	22	30	22	16	177.2	5.92	0	108.629	1826.5	1833.9	1846	1809.4	2123.5	2029.3	2092.3	2098.2	2140.2	1786.8	1780.2	1807.4	1778.3	1849.1	1896.4	1951.2	1817.3	1675.5	1737.6
Q9VZ71	RE01453p OS=Drosophila melanogaster OX=7227 GN=Dmel\CG15211 PE=2 SV=1	2.431	0.993	2.449	0.94	2.285	0.933	5.71799e-07	0.989099	3.98627e-07	0.99514	7.56568e-07	0.945781	97.8	237.9	97.2	104.1	3.45	10.04	8.24	19.15	1	2	2	2	9	18.9	8.19	0	7.517	98.7	97	97	104.2	241.2	205.4	237.9	202.2	253.4	87.1	94.6	99.8	106	118.3	120	80.4	91.7	90.6	91.9
Q9W4I3	Large ribosomal subunit protein uL30m OS=Drosophila melanogaster OX=7227 GN=mRpL30 PE=1 SV=1	1.437	1.016	1.414	0.894	1.284	0.908	5.80863e-07	0.941954	3.04757e-07	0.0654309	2.32976e-05	0.0239072	2657.5	3818.7	2699.9	2974	3.67	2.03	7.16	5.58	1	10	25	10	52	21	9.73	0	45.16	2609.7	2638.9	2831.3	2676.1	3818.7	3836.3	3769.7	3874.9	3674.6	2798.1	2688.4	2366.2	2711.5	2978.4	2752.8	2969.6	3157.3	2394.1	2500.4
Q8MZ22	RE12890p OS=Drosophila melanogaster OX=7227 GN=BcDNA:RE12890 PE=1 SV=1	0.675	1.953	0.346	0.791	0.534	1.544	5.81022e-07	4.60416e-10	4.56213e-12	6.76596e-05	1.0743e-09	9.62491e-08	197.4	133.3	385.5	249.6	4.81	8.15	1.53	1.78	1	9	13	9	22	55.5	7.43	0	37.346	194.7	200.2	181	201.4	133.3	126.6	127.1	153.4	139.2	387.9	378.9	392.5	383.1	249.4	249.8	241.8	251.8	178.6	189.7
Q9VMM2	Uncharacterized protein, isoform B OS=Drosophila melanogaster OX=7227 GN=Dmel\CG11034 PE=4 SV=2	1.409	1.464	0.962	0.763	1.074	1.117	6.05766e-07	5.02463e-07	0.879197	2.70605e-05	0.0898333	0.0328137	204.3	287.7	299.1	267.8	4.47	5.26	5.09	5.38	1	4	6	4	6	84.9	5.03	0	10.56	191.3	202.4	206.1	213	299.5	311.4	276.8	275.6	287.7	312.9	279.2	306.6	291.8	271	280.1	246.3	264.6	175.5	191.8
G2J5Z0	FI15274p1 OS=Drosophila melanogaster OX=7227 GN=CG8446-RE PE=1 SV=1	1.375	1.019	1.349	0.886	1.218	0.902	6.07048e-07	0.992813	8.37332e-07	0.0244035	5.73088e-05	0.039765	1446.3	1988.8	1473.7	1633.3	4.35	3.86	5.25	5.2	1	5	13	5	79	8.3	9.99	0	28.887	1489.5	1381.2	1509.6	1404.5	1928	2019	2125.6	1950.6	1988.8	1433.5	1515.1	1363	1526.8	1660.9	1500.4	1606.2	1691.4	1366.4	1308.7
Q7KU01	Phosphatase 1 nuclear targeting subunit, isoform D OS=Drosophila melanogaster OX=7227 GN=PNUTS PE=1 SV=1	0.873	0.94	0.929	1.021	0.892	0.96	6.09534e-07	0.00124287	0.000948472	0.432677	4.35711e-06	0.0205521	2074	1811.6	1949.5	2030.8	1.08	3.05	0.78	0.99	1	24	41	24	22	120.6	9.22	0	120.363	2105.4	2065.9	2053.6	2082.2	1811.6	1772.9	1832.4	1917.4	1794.7	1943.3	1955.8	1925	1957.9	2039	2016.2	2061.2	2022.6	1931.4	1957.4
P13607	Sodium/potassium-transporting ATPase subunit alpha OS=Drosophila melanogaster OX=7227 GN=Atpalpha PE=1 SV=3	1.249	1.043	1.198	1.032	1.289	1.076	6.12483e-07	0.480969	3.88711e-06	0.29546	8.00283e-08	0.0249376	12932.7	16158.6	13489.6	12536	2.95	3.97	1.66	1.73	1	44	174	39	46	115.5	5.69	0	292.629	12675.6	13141.7	13493.9	12727.1	16516.5	15153.3	15291.4	16158.6	16367.5	13071	13477.6	13501.7	13553.3	12735.2	12688.2	12301.5	12385.6	11628.1	12451.9
Q24238	Alkaline phosphatase 4 OS=Drosophila melanogaster OX=7227 GN=Alp4 PE=2 SV=3	1.73	0.926	1.868	1.025	1.773	0.95	6.14899e-07	0.363843	9.4032e-08	0.986629	4.16903e-07	0.541945	2154.4	3727.1	1995.7	2101.6	11.49	7.73	4.29	6.39	1	18	42	18	40	65.2	6.29	0	100.424	1895.4	2220.9	2490.9	2089.8	3727.1	3779.9	3438.8	3579.1	4206.5	2000.6	1990.8	1848.4	2042.9	2299.1	2171.9	2033.5	2004.2	1738.8	2104.3
Q7JY89	RE35124p OS=Drosophila melanogaster OX=7227 GN=BEST:HL05962 PE=1 SV=1	1.355	1.034	1.311	0.945	1.28	0.977	6.19297e-07	0.896935	1.44321e-06	0.124445	1.4523e-05	0.356504	590.5	800.1	610.5	625.1	2.44	2.83	2.78	7.28	1	3	7	3	35	8.6	9.31	0	11.334	592.9	588	610.5	575.6	803.8	800.1	769.4	768.9	819.7	613	608	579.4	616.2	697.9	604.3	597.5	646.7	543.9	557.2
P53501	Actin-57B OS=Drosophila melanogaster OX=7227 GN=Act57B PE=1 SV=1	1.553	1.019	1.524	0.998	1.551	1.018	6.23915e-07	0.993683	4.61364e-07	0.967471	3.67913e-07	0.99715	882.6	1370.9	899.6	884.1	6.48	7.72	3.24	4.03	1	23	186	5	66	41.8	5.39	0	166.898	871.8	845.3	979.7	893.4	1456.2	1370.9	1367.9	1184.3	1421.5	844	902.7	904.1	896.5	912.8	863.8	904.8	837.4	799.8	800.9
Q1WWB7	IP10750p OS=Drosophila melanogaster OX=7227 GN=betaG PE=1 SV=1	0.85	0.879	0.967	1.126	0.957	0.99	6.24923e-07	2.59462e-05	0.0993336	0.000110787	0.0157956	0.765144	1352.6	1150.4	1189.4	1201.6	3.22	2.72	1.58	2.24	1	4	9	4	10	35.3	6.1	0	16.207	1406.8	1369.5	1336	1305.6	1122.4	1159.5	1086.7	1156.9	1150.4	1199	1200.7	1160.8	1179.8	1243.1	1200.3	1202.9	1178.3	1290.5	1297.6
Q8IRD0	RH17559p OS=Drosophila melanogaster OX=7227 GN=Dmel\CG32267 PE=1 SV=1	0.511	1.038	0.492	0.886	0.452	0.92	6.33167e-07	0.78414	2.16672e-07	0.272613	7.77338e-08	0.770838	1649.2	842	1712.3	1861.3	3.59	16.36	3.1	2.88	1	3	8	3	55	5.5	9.98	0	13.931	1634.1	1664.3	1555.7	1691.8	854.8	821.2	827.1	1165	842	1696.5	1813.5	1712	1712.5	1849.5	1873.1	1873.8	1761.8	1499.1	1576.9
Q7K8Y5	Serpin 4 OS=Drosophila melanogaster OX=7227 GN=Spn42Da PE=1 SV=1	1.451	0.978	1.483	1.017	1.475	0.995	6.64392e-07	0.947862	3.55139e-07	0.910347	3.099e-07	0.999342	1299.9	1885.9	1271.9	1278.4	5.88	6.01	1.92	3.82	1	15	27	15	44	47.6	6.01	0	78.615	1285.7	1212.6	1397.7	1314.3	1842.6	1890.4	1902.8	1639.4	1885.9	1270.6	1311	1252.6	1273.2	1277.5	1324.6	1206.9	1279.2	1179.4	1148.9
P22464	Annexin B9 OS=Drosophila melanogaster OX=7227 GN=AnxB9 PE=1 SV=2	1.443	1.253	1.151	1.03	1.487	1.292	6.75061e-07	0.000288055	0.00563186	0.888889	2.95136e-07	9.28519e-05	9868.7	14242.5	12369.6	9577.6	1.33	7.32	4.59	5.4	1	16	55	16	41	36	4.88	0	65.608	9913.4	9864.6	9872.8	9625.9	15617.1	12864	14242.5	14842.3	13772.8	11504.3	12324.8	12856.4	12414.5	9631.3	10183.7	9524.2	8922.7	9094.2	9346.8
H9XVM9	Uncharacterized protein, isoform L OS=Drosophila melanogaster OX=7227 GN=Dmel\CG1674 PE=1 SV=1	1.958	0.948	2.066	0.966	1.893	0.916	6.84301e-07	0.370732	1.04864e-07	0.88359	1.67401e-06	0.123615	231.7	453.8	219.6	239.8	7.23	7.43	10.49	12.84	1	9	11	9	13	101.6	7.33	0	27.716	231.5	231.9	260	219.8	489.9	413.3	453.8	440.9	494.4	225.9	217.6	178.1	221.7	293.8	248.3	221.6	231.5	212.4	219.8
Q8IN49	MIP05539p OS=Drosophila melanogaster OX=7227 GN=Dmel\CG31195 PE=1 SV=2	1.225	0.826	1.483	1.255	1.537	1.037	6.86457e-07	1.66547e-05	6.16642e-10	2.70235e-06	2.54e-10	0.528623	2562	3137.4	2116.1	2041.4	5.24	1.33	2.14	2.84	1	19	27	19	24	94.3	7.44	0	83.316	2599.2	2542.7	2581.4	2315.6	3145.3	3172.6	3067.7	3137.4	3096.8	2049.2	2142.1	2142.1	2090.5	2069	2107	2014.1	1975.8	2384.3	2409.2
Q9VTB3	guanylate kinase OS=Drosophila melanogaster OX=7227 GN=oya PE=1 SV=1	0.74	0.382	1.937	1.629	1.205	0.622	6.90284e-07	4.47009e-12	5.31233e-11	2.40538e-09	4.72431e-05	9.25845e-09	3229.2	2389.1	1233.6	1982.7	1.6	3.26	4.2	6.82	1	10	23	10	34	25.9	7.44	0	69.061	3243.5	3214.9	3152.9	3274.1	2411.3	2370.5	2389.1	2449.6	2245.4	1141.1	1220.5	1251.2	1246.8	1735.2	2008.7	2014.1	1957	2975.4	3046.1
Q9VWV6	Transferrin OS=Drosophila melanogaster OX=7227 GN=Tsf1 PE=1 SV=1	0.401	0.397	1.011	2.35	0.942	0.932	6.91997e-07	1.59419e-06	0.996997	6.59178e-06	0.523523	0.676239	24938.6	10000.2	9891.9	10611.3	11.38	10.9	12.79	19.98	1	35	124	35	51	71.8	7.06	0	201.057	22293.8	28816.4	23707.9	26233.2	7950.2	9303.8	10703.9	10031.9	10000.2	9814.7	9969.8	11219.9	8169.5	11487.6	8948.5	9801.8	13957.2	20451.3	27303.9
Q9VCW1	Probable cytochrome P450 6d4 OS=Drosophila melanogaster OX=7227 GN=Cyp6d4 PE=2 SV=1	1.478	1.107	1.335	0.975	1.44	1.079	6.97434e-07	0.110052	1.87232e-05	0.77826	2.26893e-06	0.448891	271.1	400.7	300.2	278.2	5.33	5.87	7.6	5.15	1	6	8	6	10	59.1	7.8	0	15.634	283	282.1	255.2	260.5	390.4	397.9	450.7	403.4	400.7	320.2	281.4	320.4	280	285.6	299.9	268.7	271	259.6	267.3
O17445	Large ribosomal subunit protein eL15 OS=Drosophila melanogaster OX=7227 GN=RpL15 PE=1 SV=1	0.839	0.926	0.907	1.034	0.868	0.958	7.01574e-07	0.00326931	0.000441185	0.188029	1.16911e-05	0.152035	8237	6914.3	7627	7963	2.01	2.29	1.61	3.17	1	8	44	8	38	24.3	11.47	0	40.7	8379.2	8341.2	8033.8	8134	6914.3	7031.8	6913.9	7266.5	6874.7	7509	7799.8	7594.2	7660	7976	7950	8216.4	7604.9	7686.7	7903.4
Q86PF4	GH08978p OS=Drosophila melanogaster OX=7227 GN=Dmel\CG10126 PE=1 SV=2	2.482	2.307	1.076	0.892	2.214	2.058	7.22911e-07	2.10472e-06	0.976674	0.977189	1.17705e-06	3.45925e-06	333.6	827.9	769.6	373.9	9.42	10.92	14.62	11.85	1	5	12	5	22	25.9	4.81	0	23.662	320.8	324.8	391.5	342.6	827.9	664.3	840.9	881.5	747.5	638.8	820.6	895.9	721.8	388.4	371.6	376.3	295.2	294.3	307.7
P09052	ATP-dependent RNA helicase vasa OS=Drosophila melanogaster OX=7227 GN=vas PE=1 SV=3	0.843	0.915	0.921	1.039	0.876	0.951	7.23669e-07	0.00299535	0.000503222	0.25213	9.21942e-06	0.10174	17992.5	15166.8	16465.4	17309.9	3.33	3.2	0.56	1.36	1	47	149	46	75	72.3	5.66	0	243.865	18327.2	18053	16963.1	17932.1	14880.7	15194.9	14199.1	15449.3	15166.8	16520.8	16472.2	16306.7	16458.6	17329.5	17308.5	17311.4	16850.3	16812.6	17105.5
Q9W237	Small ribosomal subunit protein uS9 OS=Drosophila melanogaster OX=7227 GN=RpS16 PE=1 SV=1	0.884	0.971	0.911	1.054	0.932	1.023	7.3508e-07	0.121436	1.83217e-05	0.00399107	0.000389015	0.273158	12150.8	10744.3	11795.7	11528.6	1.89	1.16	1.34	2.47	1	15	72	15	76	16.8	10.17	0	62.874	12335.5	11892	12321.7	11982.4	10744.3	10925.6	10679.2	10609.4	10833	11569.6	11852.5	11739.2	11933.6	11194.6	11736.2	11749.6	11324.7	11316	11267.8
Q9W0H6	acetyl-CoA C-acetyltransferase OS=Drosophila melanogaster OX=7227 GN=Acat2 PE=1 SV=2	1.158	1.067	1.086	1.047	1.212	1.116	7.36371e-07	0.00208628	0.00074142	0.0481662	3.09417e-08	1.9202e-05	4058.7	4701.9	4329.6	3878.1	1.62	2.13	1.67	3.07	1	16	49	16	52	41.1	7.05	0	128.574	3981.9	4013.8	4104.2	4114.7	4708.7	4652.1	4878.8	4617.9	4701.9	4333.7	4310.2	4467.5	4325.4	3743	3992.2	3953.8	3803.9	3652.9	3803.1
Q9VXK0	Protein NipSnap OS=Drosophila melanogaster OX=7227 GN=Nipsnap PE=2 SV=2	0.896	1.006	0.89	0.996	0.892	1.002	7.43136e-07	0.999965	7.04089e-07	0.999998	7.27943e-07	0.999992	1661.8	1488.9	1672.4	1668.3	2.08	1.54	1.55	1.28	1	9	18	9	45	31.9	9.17	0	48.537	1679.5	1711.5	1644.4	1635.8	1458.3	1512.9	1488.9	1482.1	1512.8	1635.8	1693.4	1684.7	1660.1	1655.3	1690.2	1681.3	1645	1540.7	1621.6
Q9VVU1	Short/branched chain specific acyl-CoA dehydrogenase, mitochondrial OS=Drosophila melanogaster OX=7227 GN=GH07925p PE=1 SV=1	0.689	0.947	0.727	1.02	0.702	0.965	7.4988e-07	0.280234	8.67727e-06	0.68021	3.08593e-06	0.870885	9383.2	6460.8	8884.8	9203.2	1.82	6.14	3.76	6.33	1	18	67	18	54	45.3	6.71	0	111.358	9493.6	9569.5	9214	9274.1	6376.1	6796.6	6412.7	7349.2	6460.8	9060.2	8969.4	8318.4	8801	8221.9	9509.7	9340.2	9068.1	8709	9067.3
Q9W1I9	Inactive peptidyl-prolyl cis-trans isomerase shutdown OS=Drosophila melanogaster OX=7227 GN=shu PE=1 SV=1	0.687	1.093	0.629	0.897	0.617	0.98	7.51921e-07	0.0587808	3.51014e-08	0.0717825	3.92426e-08	0.999446	4326	2973.2	4727.6	4822.6	4.77	6.6	3.2	5.03	1	19	35	19	45	51.8	6.05	0	97.736	4437.8	4217	4034.5	4472.4	2973.2	2998.7	2869.2	3366.3	2903.1	4760.6	4960.1	4600.4	4694.9	4773.5	4912.3	4872.2	4391	4071	3995.7
Q7JR96	SD19533p OS=Drosophila melanogaster OX=7227 GN=Snx16 PE=1 SV=1	0.798	0.932	0.856	0.957	0.764	0.892	7.54158e-07	0.0488981	4.17883e-05	0.536891	1.58937e-07	0.00404429	672	536.3	626.2	701.9	1.32	3.59	2.27	4.49	1	10	19	10	35	45.8	9.44	0	66.911	672.9	661.3	671.1	683	536.3	552.8	531.4	563.2	513.3	626.9	613.8	625.5	648.1	720.7	650.8	691.9	712.1	617.3	626.6
Q9VWL3	Uncharacterized protein OS=Drosophila melanogaster OX=7227 GN=Dmel\CG7453 PE=1 SV=2	0.84	0.981	0.856	1.031	0.866	1.011	7.57666e-07	0.379538	6.44423e-06	0.149021	1.58431e-05	0.919278	1141.8	959.4	1120.6	1107.9	3.02	3.21	1.93	2.94	1	6	10	6	25	31.9	9.23	0	24.234	1140.9	1142.6	1131	1207.1	959.4	904.8	968.1	983.1	937.1	1139.1	1116.9	1124.3	1087.9	1129.7	1086.6	1130.6	1065.4	1046.6	1082.6
A0A0B4KH14	Ras modification protein ERF4 OS=Drosophila melanogaster OX=7227 GN=Dmel\CG5447 PE=3 SV=1	0.808	0.905	0.893	0.941	0.761	0.851	7.63527e-07	0.0025841	0.000630808	0.0765822	4.12223e-08	3.31634e-05	288.3	233	260.8	306.3	0.42	2.83	2.73	4.88	1	5	7	5	31	18.2	6.52	0	22.522	286.3	288.9	287.7	288.9	233	231.8	237.6	238.2	221.8	267.7	257.2	264.4	251.9	323	288	301.1	311.7	262.7	273.7
P41094	Small ribosomal subunit protein uS13 OS=Drosophila melanogaster OX=7227 GN=RpS18 PE=1 SV=1	0.907	0.931	0.974	1.018	0.923	0.948	7.70559e-07	4.83124e-05	0.0626777	0.154431	1.56605e-05	0.00194763	10805.4	9797.1	10063	10611.4	1.92	1.52	1.21	1.14	1	14	83	14	66	17.6	10.48	0	68.538	11118.3	10827.8	10783.1	10619.2	9797.1	9845.7	9638.3	10013	9675.8	10161.2	9965.8	9965.3	10189	10692.4	10409.4	10611.2	10611.6	10199.5	10259.4
A8DZ29	Eukaryotic translation initiation factor 4G1, isoform B OS=Drosophila melanogaster OX=7227 GN=eIF4G1 PE=1 SV=1	0.902	0.958	0.942	0.974	0.878	0.932	7.7357e-07	0.00286847	0.000579547	0.18639	7.13179e-08	8.00623e-05	28168.8	25417.7	26979	28933.1	1.17	1.99	1.27	1.57	1	76	335	75	45	211	8.35	0	551.618	28143.3	27979.5	28194.4	28744	25992.4	25417.7	24588.5	25514.6	25372.2	27141.1	26841.9	26409.8	27116.9	29116.2	28450.6	28751.1	29504.5	25817.4	26510.9
P12080	Integrin alpha-PS2 OS=Drosophila melanogaster OX=7227 GN=if PE=1 SV=2	1.283	0.917	1.398	1.125	1.443	1.032	7.76736e-07	0.0486964	3.25032e-08	0.00178784	6.06851e-09	0.304173	1101.7	1413	1010.5	979.1	2.72	4.75	1.69	4.65	1	11	19	11	9	154.2	6.19	0	54.47	1104.8	1122.3	1098.6	1052.5	1444.9	1344.8	1375.2	1413	1519.4	1000.2	1029.8	1020.8	993.4	994.8	963.7	995	899.9	1013.5	1063.4
Q9V9X7	polyribonucleotide nucleotidyltransferase OS=Drosophila melanogaster OX=7227 GN=PNPase PE=2 SV=2	0.866	0.941	0.921	0.993	0.86	0.934	7.91199e-07	0.00888016	0.000202975	0.981786	1.24446e-06	0.017496	2415.1	2091.5	2271.7	2432	1.07	0.9	1.27	3.69	1	24	38	24	36	84.9	7.66	0	111.734	2415	2428.7	2369.9	2415.2	2088.4	2074.5	2097.4	2091.5	2125.7	2264.6	2247.3	2315.2	2278.8	2264.9	2453.2	2445	2419.2	2215.4	2301.3
A2RVG5	IP17430p OS=Drosophila melanogaster OX=7227 GN=Dmel\CG6006 PE=2 SV=1	1.42	1.055	1.345	1.066	1.513	1.125	8.08563e-07	0.590356	4.11268e-06	0.375212	1.22621e-07	0.0483716	776.7	1102.7	819.6	728.7	1.47	8.3	4.67	1.42	1	4	8	4	9	66.9	7.08	0	18.493	765	784.7	788	768.8	1201.6	981.3	1102.7	1095.1	1207.2	766.7	855.5	806.8	832.6	722.7	718.8	741.1	734.7	701.7	743.5
P09491	Tropomyosin-2 OS=Drosophila melanogaster OX=7227 GN=Tm2 PE=2 SV=1	2.455	0.917	2.677	0.871	2.138	0.799	8.18656e-07	0.661591	2.15901e-07	0.122938	2.06929e-05	0.015699	3250.4	7978.9	2980.9	3731.7	8.09	12.9	7	17.64	1	18	56	17	53	33	4.83	0	103.024	3326	3613.2	3176.5	2985.2	8319.8	8026	7463.5	5886	7978.9	2698.1	3040.1	3189.1	2922.9	5139.3	3702.9	3760.6	3658.2	3051.2	3423.6
Q9VXY9	Opossum, isoform A OS=Drosophila melanogaster OX=7227 GN=opm PE=1 SV=2	1.14	1.063	1.072	0.939	1.071	0.998	8.21573e-07	0.00210855	0.00086402	0.000879074	0.00217327	0.956915	2148.1	2448.5	2283.7	2287.2	0.51	1.1	1.75	3.4	1	9	17	9	29	27.8	5.17	0	44.255	2151.7	2131.4	2144.6	2156.8	2477.1	2448.5	2468.4	2446.5	2407.2	2339.4	2249.5	2302.1	2265.5	2249.6	2408.5	2325.4	2239.5	1973.9	2019.5
Q7K4Y0	Desaturase 1, isoform A OS=Drosophila melanogaster OX=7227 GN=Desat1 PE=1 SV=1	0.566	0.796	0.711	1.238	0.7	0.985	8.52336e-07	0.0218824	9.93465e-05	0.0219544	9.90566e-05	1	2947.1	1667.6	2345.3	2381.3	8.55	6.82	8.1	9.09	1	6	17	6	15	43.4	8.82	0	25.267	3113	3101.3	2800.6	2601.4	1667.6	1708.4	1639.2	1847.4	1532.3	2223.3	2651.7	2267.4	2425.9	2149.4	2454.7	2661.7	2310.1	2855.7	2938.5
Q9U1M2	Transmembrane protein 120 homolog OS=Drosophila melanogaster OX=7227 GN=CG32795 PE=1 SV=1	1.222	1.265	0.966	0.801	0.98	1.014	8.61176e-07	2.45237e-07	0.338029	3.52991e-07	0.525801	0.985609	1781	2177	2252.6	2222.2	2.79	1.8	2.91	4.8	1	7	20	7	21	45.5	9.39	0	44.47	1786.4	1784.9	1777	1685.2	2186.4	2237.9	2140.9	2177	2145.3	2344.7	2274.5	2191	2231	2385.7	2146.1	2176.6	2268.7	1638.7	1691.2
Q7JWD6	Elongin-C OS=Drosophila melanogaster OX=7227 GN=EloC PE=1 SV=1	0.853	1.019	0.837	0.904	0.771	0.921	8.68111e-07	0.347066	1.22596e-07	9.16138e-05	1.56965e-09	0.00158063	635.7	542.4	647.8	703.6	3.98	1.58	1.54	0.71	1	5	13	5	44	13.1	5.05	0	35.98	601.2	629.3	661.2	642.3	531.3	542.4	540.5	554.7	547	665	644.2	651.3	643.4	697.5	705	702.2	709.4	551.5	596.3
Q9VZ37	Uncharacterized protein, isoform A OS=Drosophila melanogaster OX=7227 GN=DIGF-1 PE=4 SV=2	2.587	0.793	3.263	1.165	3.013	0.923	8.7384e-07	0.101106	5.413e-08	0.334833	1.19881e-07	0.86544	57.9	149.8	45.9	49.7	20.59	15.64	11.89	3.16	1	2	6	2	16	14	8.1	0	7.02	62.9	47.9	76	53.3	180.3	128.2	149.8	143.2	185.4	39.4	52.6	47	44.8	49.9	51.1	49.6	47.4	57.7	45.4
Q9W3C3	LD10016p OS=Drosophila melanogaster OX=7227 GN=Dmel\CG2004 PE=1 SV=1	1.15	1.066	1.079	1	1.15	1.066	9.14659e-07	0.00268059	0.00079449	0.899815	2.16055e-06	0.00928426	3629.9	4173.1	3869.1	3630.2	0.44	2.58	2.35	2.67	1	21	52	21	51	48.3	5.21	0	109.224	3620.9	3638.8	3649.4	3615.3	4141.9	4173.1	4390.1	4124.5	4250.8	3861.8	3827.5	4033.6	3876.5	3610	3650.5	3609.6	3815.4	3321.7	3447.8
Q95U58	GH05885p OS=Drosophila melanogaster OX=7227 GN=mkg-p PE=2 SV=1	0.541	0.509	1.062	1.969	1.065	1.003	9.20563e-07	8.91609e-07	0.938624	1.98436e-06	0.998924	0.903755	254.4	137.7	129.6	129.2	7.45	6.25	11.77	13.67	1	4	5	4	8	74.7	8.15	0	10.539	239.8	260.9	248.1	283.9	122.2	137.7	138.3	123.5	137.7	142.4	135.2	124.2	107.9	158.5	122.3	117.9	136.6	219.9	247.2
P22700	Calcium-transporting ATPase sarcoplasmic/endoplasmic reticulum type OS=Drosophila melanogaster OX=7227 GN=SERCA PE=1 SV=2	1.097	1.044	1.05	0.873	0.957	0.911	9.42586e-07	0.00740452	0.000307838	1.93168e-08	0.00244449	1.10154e-06	19280.1	21144.5	20134.4	22094.8	1.07	1.73	1.15	1.6	1	40	181	40	40	111.6	5.41	0	277.78	19240.3	19094.3	19319.9	19588.3	21597.1	21144.5	21692.4	20803.7	21124	20133.7	20135.2	20366	19804.7	22031.2	22760.9	22158.6	22000.2	17650.3	18092
Q9VPD3	Phosphatidylserine synthase OS=Drosophila melanogaster OX=7227 GN=Pss PE=1 SV=1	0.916	0.983	0.932	0.916	0.839	0.9	9.45751e-07	0.281697	1.13388e-05	9.05345e-07	1.68456e-10	1.20121e-07	2399.8	2198.9	2358.2	2620	1.05	1.47	0.95	1.54	1	12	40	12	27	56.8	9.22	0	84.194	2368.6	2406.2	2429.1	2393.4	2154.9	2228.5	2182.7	2232.6	2198.9	2334.2	2371.3	2345.1	2382.5	2594.6	2624.2	2688.6	2615.8	2172.8	2279.9
Q8MT18	RH49423p OS=Drosophila melanogaster OX=7227 GN=Idh3g PE=1 SV=1	0.887	1.02	0.87	0.985	0.874	1.004	9.83085e-07	0.428809	1.63078e-07	0.328196	1.30794e-07	0.99674	3910.5	3468.3	3988.1	3970.5	0.71	1.91	0.97	2.41	1	16	47	16	49	44.4	6.8	0	111.476	3927.9	3864.8	3904.1	3917	3419.2	3466.2	3512.1	3468.3	3595.8	3996.3	3921.1	4007.4	3979.9	3994.4	3946.8	3889.3	4115.7	3603.3	3661.9
Q9VLT3	LD23292p OS=Drosophila melanogaster OX=7227 GN=Mcr PE=1 SV=1	1.151	0.994	1.157	1.136	1.308	1.13	1.01815e-06	0.83674	3.79322e-07	2.09496e-06	2.73918e-10	6.00161e-06	4395.7	5059	4371.3	3868.1	0.6	2.6	1.85	2.12	1	42	67	42	28	202.7	6.47	0	205.131	4386.6	4404.7	4419.4	4358.4	5132.1	4810.1	5012.7	5122.9	5059	4221.6	4398.5	4375.1	4367.6	3913.2	3853.8	3882.4	3727.9	4024.1	4173.5
Q4V6M7	Probable Ufm1-specific protease 1 OS=Drosophila melanogaster OX=7227 GN=Ufsp1 PE=1 SV=1	1.29	0.975	1.324	0.964	1.244	0.939	1.02119e-06	0.568347	2.21449e-07	0.796274	3.27678e-06	0.16499	207.8	268.1	202.5	215.6	6.62	1.77	2.43	2.58	1	6	7	6	35	25.8	5.95	0	14.713	198.2	217.9	196.9	224.3	268.1	271.8	261.5	273.6	266.3	204.3	206.9	200.8	195.6	206.6	218.9	213.7	217.6	181.8	206.5
Q9VKQ5	GEO07393p1 OS=Drosophila melanogaster OX=7227 GN=Dmel\CG17124 PE=2 SV=1	0.577	0.816	0.707	1.002	0.578	0.818	1.05588e-06	0.035133	8.66327e-05	0.97428	6.37605e-07	0.0163963	973.7	562	795	972.1	7.69	10.56	3.55	5.57	1	2	4	2	13	14.6	6.04	0	6.076	996.6	951.4	842.4	996.9	580.8	562	556.6	659.4	491.7	795.9	834.8	765.9	794	937.7	1007.9	1017.3	906.7	914.2	901.4
Q9VM18	Trehalose 6-phosphate phosphatase OS=Drosophila melanogaster OX=7227 GN=21430192 PE=1 SV=1	1.793	0.948	1.891	1.119	2.005	1.06	1.06659e-06	0.711723	3.02861e-07	0.286517	1.266e-07	0.853607	2821.2	5057.1	2674.5	2522.1	2.55	9.56	4.35	10.1	1	12	35	12	43	31.2	7.12	0	60.194	2852.2	2943.7	2790.4	2790.5	5086.8	4056.4	4553.7	5072	5057.1	2552.6	2695.9	2834.4	2653.1	2893.3	2689	2362.3	2365.5	2616.5	2789.2
Q8T088	WD repeat-containing protein 55 homolog OS=Drosophila melanogaster OX=7227 GN=CG14722 PE=2 SV=1	0.834	0.919	0.908	1.118	0.933	1.028	1.06741e-06	0.00414113	0.000645224	0.000287883	0.0116767	0.438047	3136.1	2617.1	2882.7	2804	3.01	3.41	1.76	3.01	1	14	27	14	27	55.3	4.53	0	60.658	3264.2	3195	3078.4	3067.8	2617.1	2663	2451	2574.5	2665.4	2819.2	2888	2877.5	2942.6	2880.1	2804.7	2803.2	2677.6	2994.4	3027.3
Q9VZL1	Mitochondrial import receptor subunit TOM22 homolog OS=Drosophila melanogaster OX=7227 GN=mge PE=1 SV=1	0.827	1.052	0.786	0.917	0.759	0.965	1.09114e-06	0.160195	8.65082e-08	0.0112433	1.96235e-08	0.463303	3360	2779.3	3535.5	3662.2	2.1	3.83	2.09	2.57	1	10	47	10	67	16.1	4.6	0	89.566	3290.5	3386.2	3333.9	3454.7	2811.9	2660.2	2746.8	2952.4	2779.3	3541.6	3529.4	3420.6	3596.3	3497.3	3692	3698.3	3632.6	3018.6	3208.5
Q9VMR0	Mitochondrial import inner membrane translocase subunit Tim21 OS=Drosophila melanogaster OX=7227 GN=Dmel\CG7382 PE=1 SV=1	0.804	0.958	0.84	1.031	0.83	0.988	1.11683e-06	0.664066	4.9662e-06	0.624618	5.44284e-06	0.999884	1484.7	1194.3	1422	1439.4	1.79	3.97	4.43	1.99	1	10	19	10	47	26.6	9.98	0	49.555	1512.2	1478	1448.8	1491.5	1205.2	1182.3	1123.2	1254.7	1194.3	1537.8	1418	1425.9	1394.4	1477.4	1443	1435.8	1407.5	1387.2	1400.4
Q8IQQ4	RAB6-interacting golgin OS=Drosophila melanogaster OX=7227 GN=Gorab PE=1 SV=1	0.664	0.953	0.697	1.079	0.716	1.028	1.12289e-06	0.794261	3.6497e-06	0.266611	1.46661e-05	0.75196	145.9	96.8	139	135.2	3.72	7.76	4.8	6.46	1	4	8	4	21	37.7	7.02	0	27.37	146.7	145.1	141.4	154.4	96.4	110	96.8	101.8	89.2	140.5	151.1	137.5	136.1	126.5	145	129.9	140.7	134.5	137.5
Q8SYQ8	RE40412p OS=Drosophila melanogaster OX=7227 GN=Dmel\CG3420 PE=2 SV=1	1.477	0.974	1.517	1.012	1.496	0.986	1.13384e-06	0.806679	3.90962e-07	0.996606	8.78497e-07	0.899912	1348.9	1992.7	1313.5	1332.2	4.71	2.82	4.28	9.58	1	4	9	4	25	15.6	9.54	0	14.92	1354.9	1342.9	1443.6	1289.5	1992.7	2040	1978.5	1887.9	1993.1	1271.8	1358	1251	1356.6	1514.4	1218.3	1282.3	1384.1	1242.9	1272.4
Q9VZ20	Dynein light intermediate chain OS=Drosophila melanogaster OX=7227 GN=Dlic PE=1 SV=2	0.918	1.037	0.885	0.955	0.876	0.991	1.13675e-06	0.0018854	8.18037e-09	0.00387214	1.17505e-08	0.976691	6507.6	5972.5	6751.1	6815.7	0.78	1.28	1.51	1.52	1	24	74	24	54	54.4	6.02	0	165.071	6531.1	6442.2	6484.1	6556.3	5935.4	5980.4	5972.5	6077.8	5867.8	6946.8	6729.8	6762.8	6739.4	6615.8	6820	6811.4	6830.6	5991.3	6104
P50887	Large ribosomal subunit protein eL22 OS=Drosophila melanogaster OX=7227 GN=RpL22 PE=1 SV=2	0.852	0.905	0.941	1.035	0.882	0.937	1.1521e-06	0.000568199	0.00597145	0.0519518	6.84546e-05	0.101035	13367.5	11385.8	12095.9	12915.2	1.99	1.74	2.8	3.58	1	11	79	11	30	30.6	10.11	0	59.677	13791.1	13497.2	13238.9	13222.1	11385.8	11410.9	11280.5	11544.9	11018.3	12120.5	12640.5	11830.9	12071.4	12853.2	12977.5	13073.8	12074.3	12651.4	12788.8
Q9VLG3	FI02830p OS=Drosophila melanogaster OX=7227 GN=gi21430616 PE=1 SV=1	0.49	0.268	1.83	3.319	1.627	0.889	1.17548e-06	2.04672e-09	1.73325e-05	8.17405e-09	0.000296443	0.323189	338.5	165.9	90.7	102	4.17	15.36	10.13	10.6	1	5	8	5	8	77.3	6.6	0	14.461	341.4	349.3	316.5	335.6	170.6	192.6	140.3	165.9	131.3	95.7	76.4	94.7	86.7	100.1	89	103.9	115.3	313.2	331
Q7K485	Cathepsin D OS=Drosophila melanogaster OX=7227 GN=cathD PE=1 SV=1	1.358	1.283	1.058	0.765	1.039	0.981	1.18054e-06	1.51695e-05	0.420249	3.30052e-06	0.982958	0.661675	3592.4	4879.2	4609.8	4698.1	2.6	5.2	3.85	4.86	1	11	41	11	39	42.4	6.32	0	71.102	3658.5	3515.6	3702	3527.4	4909.2	4466.8	4879.2	4630	5101.4	4335.9	4612.8	4759.2	4606.7	4546.8	5037.5	4823.3	4576.1	3356.1	3331.1
Q9VE00	Probable cytochrome P450 12a4, mitochondrial OS=Drosophila melanogaster OX=7227 GN=Cyp12a4 PE=2 SV=2	2.21	0.401	5.516	0.826	1.827	0.331	1.23472e-06	4.02807e-07	1.22251e-10	0.0585663	6.72132e-05	2.41138e-08	436.7	965.3	175	528.4	5.67	14.34	5.9	17.67	1	13	19	10	28	61.7	8.6	0	49.24	398.7	457.4	435.4	438	965.3	996.9	871.7	798.6	1161	179.7	170.4	159.7	182	568	474.9	491.6	690.5	365.7	433.4
Q9VYH8	Kazal-like domain-containing protein OS=Drosophila melanogaster OX=7227 GN=Dmel\CG15721 PE=4 SV=2	1.984	1.69	1.174	0.863	1.712	1.458	1.23853e-06	0.000120047	0.0422257	0.281603	1.55773e-05	0.00281012	853.2	1692.8	1441.9	988.8	6.29	17.22	12.92	1.2	1	20	34	20	28	98.4	5.05	0	91.568	839.5	867.2	911.2	783.5	1509.3	1989.1	2313	1685.8	1692.8	1232.4	1527.7	1658.2	1360.9	986.2	979	991.3	1007.1	770.1	821.7
Q9W4C1	IP13321p OS=Drosophila melanogaster OX=7227 GN=Dmel\CG15784 PE=1 SV=1	6.606	1.281	5.157	0.985	6.507	1.262	1.25415e-06	0.52893	7.77291e-06	0.999997	1.28532e-06	0.540296	735.1	4856.5	941.7	746.4	7.82	39.88	8.19	6.72	1	6	17	6	10	62.3	10.33	0	29.835	723.1	803.7	747.4	665.1	3492.7	4856.5	5210.5	6711.7	2025.8	889.8	882.2	1038.4	996.7	733.2	785.4	670	759.9	663.3	761.5
P20439	G2/mitotic-specific cyclin-B OS=Drosophila melanogaster OX=7227 GN=CycB PE=1 SV=2	1.397	1.482	0.943	0.888	1.241	1.316	1.26052e-06	2.76401e-07	0.251699	0.0252259	0.000147686	1.52639e-05	2655	3708.4	3933.8	2988.6	3.17	6.25	4.51	5.24	1	16	30	16	29	59.2	9.64	0	78.584	2570.8	2658.4	2651.5	2775.7	3445	3534	4035.2	3708.4	3797.9	3970.8	3759.5	4186	3897	3092.1	2888.5	2842.9	3168.9	2358.4	2518.9
Q9W277	Vacuolar protein sorting-associated protein 35 OS=Drosophila melanogaster OX=7227 GN=Vps35 PE=1 SV=4	0.91	1.024	0.889	0.991	0.902	1.015	1.26485e-06	0.129888	8.57091e-08	0.829927	4.56939e-07	0.447559	6269.4	5707	6418.5	6325.7	0.96	1.58	1.38	1.64	1	28	77	28	37	93.1	5.47	0	173.79	6311.9	6227.1	6217.8	6338	5586.3	5753.3	5688.1	5833.1	5707	6433.3	6328.3	6541.7	6403.7	6209.5	6451.8	6363.8	6287.8	5790.3	5900.2
B7YZP6	Sol narae, isoform C OS=Drosophila melanogaster OX=7227 GN=sona PE=4 SV=1	0.579	0.923	0.627	1.026	0.594	0.947	1.27789e-06	0.64345	6.04776e-06	0.920115	2.85807e-06	0.942516	1572.8	910.6	1451.3	1533.3	5.16	14.7	2.31	4.47	1	12	19	12	11	121.6	7.27	0	38.334	1579.4	1660.1	1463	1566.3	944.4	769	910.6	1042.3	728.3	1468.6	1415.8	1490.5	1434.3	1519.8	1548.7	1546.8	1406.5	1448.8	1573
Q9VST1	Uncharacterized protein, isoform A OS=Drosophila melanogaster OX=7227 GN=Dmel\CG5194 PE=4 SV=2	0.779	1.079	0.723	0.961	0.749	1.037	1.27895e-06	0.0284601	3.62047e-08	0.728489	3.69988e-07	0.172954	497.3	387.6	536.4	517.4	3.97	3.45	2.5	4.61	1	3	5	3	10	33.1	5.8	0	11.581	519.1	502.8	492	472.2	412.6	387.9	378.5	387.6	381.6	528.8	536.4	559.9	536.4	530.1	513.4	476.6	521.5	476.2	476.4
Q9VMQ5	Ubiquinone biosynthesis monooxygenase COQ6, mitochondrial OS=Drosophila melanogaster OX=7227 GN=Coq6 PE=2 SV=1	1.104	1.051	1.05	0.944	1.042	0.992	1.3073e-06	0.00213005	0.00170954	0.00132917	0.0028228	0.992851	1718.3	1897.2	1806.4	1821	0.93	1.18	2.46	0.99	1	11	22	11	31	52	7.33	0	60.932	1742.6	1718.6	1703.9	1718	1931.5	1904.9	1897.2	1876.1	1879.2	1861.1	1827.1	1760.3	1785.9	1820.9	1821.2	1824.8	1786.8	1598.6	1628.4
C0HK92	Uncharacterized protein CG45076 OS=Drosophila melanogaster OX=7227 GN=CG45076 PE=1 SV=1	1.825	0.806	2.263	0.907	1.654	0.731	1.30998e-06	0.0636274	5.76455e-08	0.119058	3.8057e-05	0.000813361	1881.7	3433.5	1517.1	2075.4	4.32	8.21	2.01	19.08	1	22	37	21	39	68.6	5.06	0	76.853	1913.6	1911.3	1852.4	1742.4	3778	3316.6	3433.5	3307.6	3953.8	1513.3	1491.8	1520.8	1564.8	2851.5	2036.5	1906.2	2115.1	1755.5	1811
Q9VHF5	LD42595p OS=Drosophila melanogaster OX=7227 GN=pasi2 PE=2 SV=1	1.294	1.087	1.191	1.132	1.465	1.23	1.33309e-06	0.0638331	6.86076e-05	0.00192361	9.26184e-09	2.25059e-05	251	324.8	272.7	221.8	2.13	5.69	2.89	3.39	1	3	6	3	10	29.4	9.61	0	10.188	254.7	244.4	254.9	247.3	324.8	333.6	310.2	303.4	349.5	275.1	277.6	259.9	270.2	223.1	225.2	208.5	220.5	233.6	231.5
Q9VRJ5	Charged multivesicular body protein 2b OS=Drosophila melanogaster OX=7227 GN=CHMP2B PE=1 SV=1	1.303	1.048	1.242	1.053	1.371	1.103	1.34899e-06	0.474765	9.6646e-06	0.0756273	6.5237e-08	0.00517921	1514	1972.2	1587.3	1438.5	6.3	2.67	2.97	3.38	1	9	21	9	42	23.8	5.95	0	45.23	1506.7	1521.4	1682.1	1457.9	1951.3	1954.9	1999.8	1972.2	2080.3	1573	1572.7	1673.8	1601.8	1464.5	1367.3	1412.9	1469.9	1382.2	1441.5
Q9VUJ1	Proteasome subunit beta OS=Drosophila melanogaster OX=7227 GN=Prosbeta2 PE=1 SV=1	1.135	1.2	0.946	0.967	1.098	1.161	1.35233e-06	1.94357e-08	0.00143751	0.096106	4.81846e-05	2.30147e-07	5686.9	6455.6	6824.7	5879	1.38	1.71	2.68	1.64	1	17	68	17	63	29.8	8.66	0	97.015	5631.5	5668	5813.6	5705.8	6394.2	6455.6	6618.6	6322.2	6477.9	6721.8	6724.2	6926.7	7105.3	5818.4	6039.3	5903.2	5854.9	5166.1	5370.5
Q9VZ00	FI19420p1 OS=Drosophila melanogaster OX=7227 GN=Dmel\CG1737 PE=1 SV=1	0.816	0.962	0.848	1.076	0.878	1.035	1.3986e-06	0.293037	1.72499e-05	0.0177023	0.000235335	0.38517	3926.9	3204.7	3778.4	3650.6	2.63	3.01	2.91	2.94	1	35	66	35	43	102.1	9.95	0	192.153	3901.2	3952.8	3746.8	3973.3	3286.3	3204.7	3132	3361.2	3146	3599.9	3836.8	3823	3734.3	3612	3689.7	3715.2	3477.9	3578.8	3745.3
Q0E9G3	Protein kintoun OS=Drosophila melanogaster OX=7227 GN=Nop17l PE=1 SV=1	0.801	1.088	0.736	1.011	0.81	1.1	1.4075e-06	0.0443567	4.98187e-08	0.991779	2.01107e-06	0.026641	2667.1	2135.3	2902	2637	1.76	5.4	3.11	2.34	1	27	49	27	39	94.7	6.34	0	126.459	2690.5	2643.8	2603.9	2707.1	2135.3	2176.9	2030.6	2216.4	1938.9	2953.4	2874	2753	2930.2	2573.6	2621.2	2721	2652.9	2468.2	2505
Q9VZE7	Choline transporter-like 1 OS=Drosophila melanogaster OX=7227 GN=Ctl1 PE=2 SV=1	1.369	1.051	1.302	1.029	1.409	1.082	1.43655e-06	0.741018	5.45027e-06	0.939957	7.17841e-07	0.418371	464.6	636.1	488.4	451.5	2.82	6.89	5.56	3.72	1	6	16	6	12	76.8	7.66	0	44.271	477.2	465.5	463.7	445.6	636.1	605.1	640.9	625.6	721.6	443.6	479.5	497.5	502.7	463.7	439.1	472.3	439.7	437.8	441
Q9VZ67	Uncharacterized protein OS=Drosophila melanogaster OX=7227 GN=Dmel\CG15210 PE=4 SV=1	2.362	1.694	1.395	0.916	2.163	1.551	1.44066e-06	0.000460379	0.0107415	0.949361	2.85163e-06	0.00113765	21.4	50.5	36.2	23.4	13.4	12.04	10.07	14.83	1	1	3	1	17	7.5	4.56	0	9.84	20.4	21.2	27	21.6	50.5	50.5	49.3	42.4	59.4	33.1	41.1	38.3	34.2	19.7	28.2	23.4	23.3	18.7	20.1
O16797	Large ribosomal subunit protein uL3 OS=Drosophila melanogaster OX=7227 GN=RpL3 PE=1 SV=3	0.895	0.915	0.978	1.019	0.912	0.932	1.45777e-06	3.49544e-05	0.228149	0.184583	2.87169e-05	0.00109012	27742.1	24834.5	25388.4	27226.4	1.82	1.83	1.69	2	1	24	196	24	53	46.9	10.24	0	175.662	28544.6	27995.6	27468.3	27490.8	24834.5	25288	24364.2	25035.3	24206.6	25379.4	25879.3	24832	25397.4	27587.5	27040.5	27413.5	26363.9	26185.6	26526.2
Q9VFB3	Arginine methyltransferase 3, isoform A OS=Drosophila melanogaster OX=7227 GN=Art3 PE=1 SV=1	0.847	1.089	0.777	0.938	0.794	1.022	1.46045e-06	0.000636944	5.64807e-09	0.0251495	3.75936e-08	0.216308	3824.2	3237.2	4166.4	4076.3	1.81	2.59	1.81	3.25	1	16	50	16	34	58.9	4.73	0	115.118	3775.9	3754.8	3894.1	3873.1	3405.8	3187.2	3221.9	3272.2	3237.2	4148.9	4184	4308.6	4148.6	4048.5	4104.3	4181.4	3871.8	3463.9	3557.8
Q9V9Z1	Large ribosomal subunit protein bL32m OS=Drosophila melanogaster OX=7227 GN=mRpL32 PE=2 SV=1	1.273	1.016	1.253	0.965	1.228	0.98	1.46445e-06	0.994002	2.01867e-06	0.81613	4.58864e-06	0.922357	661	841.6	671.5	685.2	2.55	2.6	5.46	4.43	1	6	15	6	29	22.6	9.23	0	27.097	670.3	632.3	664.6	657.5	841.6	878.5	829.4	856.1	824.1	657.7	690.6	611.8	685.5	681.7	628.5	688.6	691.9	614.9	599.1
Q6NQY9	RNA helicase OS=Drosophila melanogaster OX=7227 GN=cg9143 PE=1 SV=1	0.813	0.872	0.932	1.149	0.934	1.002	1.47672e-06	9.7734e-05	0.0704891	0.000174827	0.0350511	0.981643	3486.2	2833.6	3040.9	3033.5	2.97	4.08	3.33	0.97	1	27	54	27	40	91.5	8.78	0	129.769	3580.1	3548.3	3360.2	3425.1	2852.7	2753.4	2833.6	3026.6	2734.4	3018.5	3087.2	2864.2	3063.5	3012.3	3054.9	3059.9	3001.5	3284.2	3362.1
Q9VRX6	Innexin inx4 OS=Drosophila melanogaster OX=7227 GN=zpg PE=2 SV=1	0.839	0.782	1.073	0.871	0.731	0.681	1.53488e-06	2.5979e-08	0.00216216	1.02776e-05	7.54144e-10	9.0614e-11	1661.1	1393.7	1298.9	1906.9	2.69	2.72	0.71	2.88	1	6	15	6	15	42.8	8.97	0	24.589	1662.6	1659.6	1582.5	1683.2	1393.7	1367.5	1383.2	1463.9	1424.8	1295.7	1316	1297.8	1300	1879.7	1941.8	1934.4	1824.7	1525.2	1572.5
Q2PDT4	Transforming growth factor beta-1-induced transcript 1 protein OS=Drosophila melanogaster OX=7227 GN=Pax PE=1 SV=1	1.238	0.899	1.377	1.022	1.265	0.919	1.53707e-06	0.00373923	1.44126e-08	0.479138	2.68337e-07	0.0542708	1258.5	1557.5	1130.9	1231.2	2.51	3.03	3.49	3.59	1	10	24	10	29	64.7	6.96	0	68.011	1221.3	1240.7	1289.8	1276.5	1568.2	1473.2	1557.5	1595.3	1525.6	1102.9	1145.3	1192.9	1116.7	1236.3	1226.1	1250.2	1152.4	1120.4	1175.6
P54362	AP-3 complex subunit delta OS=Drosophila melanogaster OX=7227 GN=g PE=1 SV=4	0.845	0.988	0.855	0.938	0.793	0.927	1.55375e-06	0.727594	6.13648e-06	0.0104662	2.47663e-08	0.00160575	2271	1918.9	2244.4	2420.1	2.19	2.57	0.92	4.53	1	21	48	21	23	114.8	7.28	0	111.66	2256.6	2285.4	2255.8	2362.5	1952.1	1899.1	1918.9	1954.2	1834.3	2253.4	2217.6	2235.4	2264.7	2418.5	2421.8	2404.7	2638.2	2070.1	2165.5
Q95SX8	N-alpha-acetyltransferase 60 OS=Drosophila melanogaster OX=7227 GN=Naa60 PE=1 SV=1	0.486	0.904	0.538	1.037	0.504	0.937	1.55929e-06	0.241468	2.39019e-05	0.951514	3.06393e-06	0.485094	92.5	45	83.6	89.2	4.67	14.4	9.22	9.1	1	3	5	3	11	31.8	8.41	0	11.669	98.8	91.2	93.8	88.7	40.9	45	56.1	43.6	54.8	85.9	82.9	84.2	69.6	99.2	81.4	84.8	93.8	90.7	86.4
Q0KHX7	FI18193p1 OS=Drosophila melanogaster OX=7227 GN=spdi PE=1 SV=1	1.78	0.928	1.918	1.143	2.035	1.061	1.55988e-06	0.397728	2.29262e-07	0.0954356	8.43469e-08	0.785708	2140.9	3810.1	1986.3	1872.5	9.99	10.65	3.45	6.23	1	30	48	30	28	121.6	5.66	0	132.322	2171.7	2009.8	2516.6	2110.6	3810.1	3558.3	3929.5	3215.5	4281.6	2004.3	1922.7	1968.4	2085.5	1926	1775.3	1820.5	2039.6	1992.2	1904.3
Q9BJZ5	RNA-binding protein fusilli OS=Drosophila melanogaster OX=7227 GN=fus PE=2 SV=1	0.818	0.874	0.936	0.99	0.81	0.865	1.56137e-06	0.000192374	0.0340152	0.998121	1.26071e-06	0.000146693	589.4	482.3	515.4	595.6	3.49	4.19	2.11	2.47	1	8	10	8	11	102.7	7.08	0	32.095	619.1	589.7	589.1	569.1	501.8	488.2	476.1	482.3	447.5	498.5	524.1	516.9	513.9	607.1	577.4	585.9	605.5	568	558.7
Q9VEN1	Filamin-A OS=Drosophila melanogaster OX=7227 GN=cher PE=1 SV=2	1.215	1.018	1.193	1.226	1.489	1.248	1.58628e-06	0.888873	4.02165e-06	1.15242e-05	8.12051e-10	4.4831e-06	29234.7	35511.4	29772.2	23849.9	1.91	4.27	3.84	2.51	1	103	289	103	56	239	6.11	0	618.796	29074.5	29433.2	29395.8	28242.6	36842.9	34283.6	35511.4	38271.1	35337.5	28014	30116.7	30626.9	29431.5	23494.3	24818.3	24094.7	23607.6	26671.7	27888.3
P82295	Prominin-like protein OS=Drosophila melanogaster OX=7227 GN=promL PE=1 SV=1	1.241	1.077	1.152	0.887	1.1	0.955	1.60813e-06	0.0428031	0.000125715	0.00233257	0.00211251	0.408921	450.7	559.3	485.3	508.3	3.49	2.79	2.03	3.65	1	12	14	12	14	115	7.11	0	52.406	440.8	442	474	459.6	559.3	528.8	545.7	560.3	567.9	495.8	486.9	483.8	472	503.7	475.5	515.6	512.8	404.3	418.8
A8JR58	Hadley, isoform B OS=Drosophila melanogaster OX=7227 GN=hdly PE=4 SV=1	0.535	0.784	0.683	1.242	0.664	0.973	1.61907e-06	0.0151416	0.00033265	0.032589	0.00016292	0.973933	141	75.5	110.5	113.6	7.83	10.76	8.78	10.27	1	3	3	3	6	49.9	8.47	0	7.782	154.4	135.5	129.8	146.8	75.5	82.7	73.8	85.3	64.4	103.7	101.3	120.5	117.8	100.4	114.3	129.1	112.9	141.7	128.4
P20241	Neuroglian OS=Drosophila melanogaster OX=7227 GN=Nrg PE=1 SV=2	1.356	1.026	1.321	1.131	1.534	1.161	1.63799e-06	0.72801	6.49472e-06	0.0754926	7.63217e-08	0.0114939	8561.4	11610.1	8786.1	7567.5	3.26	6.23	5.74	4.54	1	39	90	39	31	143.5	5.48	0	203.011	8633.5	8514.9	8608.2	8043.6	12344.8	10988.1	11214.1	11610.1	12706.6	8183	8933.5	9383.4	8641.1	8150.8	7639.5	7496.2	7351.8	7920	8067.9
Q9VGA0	Glutathione S transferase D9, isoform A OS=Drosophila melanogaster OX=7227 GN=GstD9 PE=1 SV=1	1.288	1.222	1.054	1.175	1.513	1.435	1.71357e-06	3.22692e-05	0.302355	5.65036e-05	1.85817e-09	1.46214e-08	2365.9	3046.9	2890	2014.4	2.63	3.64	1.74	5.43	1	12	29	11	61	25.4	5.34	0	51.541	2331.2	2385.5	2470.9	2346.5	3055.9	2912.8	3143.8	2879.1	3046.9	2898.4	2802.9	2916.2	2881.7	2083.2	1947.7	1867.5	2090.1	2138.5	2260.3
Q9VIJ3	FI14214p OS=Drosophila melanogaster OX=7227 GN=BcDNA:SD01241 PE=1 SV=1	1.833	0.936	1.958	1.102	2.021	1.032	1.72752e-06	0.586567	3.68059e-07	0.0879025	8.72616e-08	0.563258	516.1	946	483.1	468.2	9.33	8.48	8.84	7.73	1	3	8	3	15	20.1	8.16	0	13.602	516.7	512.5	615.7	515.6	946	929.7	976.3	804.1	1013.4	467.5	492.8	563.6	473.6	472.7	410.8	463.8	494.7	474	485.6
A0A0B4KH03	Tetraspanin OS=Drosophila melanogaster OX=7227 GN=Tsp96F PE=1 SV=1	1.309	1.016	1.289	1.074	1.407	1.092	1.72763e-06	0.742532	6.64113e-06	0.225924	1.6101e-07	0.0406751	186	243.5	189	173.1	4.7	3.87	3.8	4.27	1	2	2	2	6	31.8	5.83	0	6.323	176.4	179.5	193.1	192.7	230.7	232.5	249.3	243.5	250.7	185	191.8	186.2	200.9	167.6	185	174.8	171.4	161.8	170.1
Q9VGG5	Cadherin-87A OS=Drosophila melanogaster OX=7227 GN=Cad87A PE=1 SV=4	0.772	0.861	0.897	0.994	0.767	0.856	1.74013e-06	0.00136339	0.00422219	0.998943	2.08323e-06	0.00174477	3883.3	2996.7	3342.2	3905.3	3.3	6.5	1.84	2.82	1	32	46	32	20	217.4	4.75	0	152.514	4058.4	3944.5	3770.5	3823.1	3135	2996.7	2949.5	3070.3	2638.3	3304.2	3418.5	3289.7	3380.6	3877.7	3933.1	3984.7	3731.4	3723	3737.4
Q7K4X4	GH24095p OS=Drosophila melanogaster OX=7227 GN=CG5286 PE=2 SV=1	1.472	1.217	1.21	1.012	1.491	1.232	1.7467e-06	0.00507387	0.00107221	0.986472	1.14935e-06	0.00278166	326	480.1	396.8	322	8.4	1.87	4.39	7.65	1	5	6	5	11	59.1	6.46	0	8.92	305.5	317	369.3	335.3	495	470	480.7	480.1	478.7	412.3	398.3	395.3	370.6	329.7	314.6	303.1	360.9	280.3	300.4
Q9W1R3	Golgin-245 OS=Drosophila melanogaster OX=7227 GN=Golgin245 PE=1 SV=2	0.847	0.819	1.035	1.132	0.959	0.927	1.77326e-06	1.5888e-07	0.0625893	4.2335e-05	0.237038	0.00261912	5143.1	4357.8	4212.1	4543.7	1.24	3.52	1.13	2.51	1	50	89	50	39	170	5.2	0	301.711	5177.7	5193.3	5055.4	5108.8	4357.8	4471.3	4344.4	4624.4	4211.2	4250.2	4200.1	4224.1	4139	4591.9	4417.7	4679.8	4496	4749.8	4920.7
Q9VX24	RE25723p OS=Drosophila melanogaster OX=7227 GN=Dmel\CG8173 PE=1 SV=1	0.869	0.907	0.958	1.019	0.885	0.924	1.77507e-06	0.000461428	0.0147407	0.713319	7.35227e-06	0.00292416	846	735	767.2	830.6	2.4	2.43	1.68	2.28	1	6	10	6	17	45	4.64	0	23.345	862.3	859.8	821.4	832.4	705.8	749.2	735	746.1	723.6	792	767.7	766.6	764.2	845.7	846.5	815.7	811.3	791.1	814.7
Q9VG06	peptidyl-tRNA hydrolase OS=Drosophila melanogaster OX=7227 GN=Dmel\CG17327 PE=1 SV=2	1.16	1.032	1.125	0.992	1.151	1.023	1.83177e-06	0.239188	2.92303e-05	0.728999	7.32186e-06	0.777225	544.8	632.2	562.1	549.2	3.68	2.86	1.14	2.16	1	5	6	5	47	15	9.61	0	35.072	516.6	539.5	550.1	563.9	632.2	628.7	670.1	649.7	626.8	571.5	562.1	555.9	562.1	543.6	552.7	545.8	570	473.9	511.2
A1Z877	Nidogen OS=Drosophila melanogaster OX=7227 GN=Ndg PE=1 SV=1	1.584	0.806	1.964	1.061	1.681	0.856	1.85126e-06	0.00417609	1.74926e-08	0.630951	4.27223e-07	0.037818	3251.6	5150.2	2622	3064.1	4.4	11.23	2.08	2.81	1	22	38	22	17	149	4.59	0	91.458	3311.9	3421.7	3192.3	3091.9	5330.9	5150.2	4955.8	4222.2	5778.5	2577.1	2598.4	2645.9	2700.3	3126.1	3003.2	2978.3	3149.5	3038.2	3242.1
Q9VJ86	Bicoid stability factor OS=Drosophila melanogaster OX=7227 GN=bsf PE=1 SV=2	0.813	0.96	0.847	0.865	0.703	0.83	1.88708e-06	0.271301	2.65997e-05	6.37202e-05	2.08831e-09	4.50405e-06	25992.9	21127.9	24944.8	30045.3	2.38	3.91	0.72	3.97	1	76	228	75	60	157.2	7.14	0	449.51	26582	25704.4	25190.7	26284.6	21075.2	21127.9	21385.7	22643.3	20358.3	24986.1	24951.5	24602.1	24938.2	28995.1	30816.8	31485.7	29293.2	24385.2	24355.2
Q8IQS5	Uncharacterized protein, isoform A OS=Drosophila melanogaster OX=7227 GN=Dmel\CG32195 PE=4 SV=1	1.765	1.236	1.428	0.981	1.732	1.213	1.89944e-06	0.0435232	0.000153805	0.980939	3.09574e-06	0.0846002	213.4	376.5	263.7	217.4	16.21	6.75	2.75	6.78	1	6	7	6	15	45.7	5.66	0	15.062	188.8	238.8	260.2	190.6	403.1	431.3	369.8	376.5	372.4	265.5	257.3	262	274.6	217.4	212.5	217.4	245.7	173.2	226.3
Q0E9F9	FI16720p1 OS=Drosophila melanogaster OX=7227 GN=Dmel\CG2915 PE=1 SV=1	1.22	1.031	1.184	0.917	1.118	0.945	1.90914e-06	0.669697	8.85595e-06	0.00704348	0.000877146	0.0563094	3597.2	4388.1	3707.3	3923.7	2.83	4.01	1.04	2.48	1	18	37	18	55	51	6.13	0	98.608	3541	3650.7	3756.3	3544.4	4250	4572.2	4388.1	4122.6	4450	3731.6	3683.1	3750.4	3669.2	3827.8	3929.5	3917.9	4064.6	3248.4	3459.1
Q09332	UDP-glucose:glycoprotein glucosyltransferase OS=Drosophila melanogaster OX=7227 GN=Uggt PE=1 SV=2	1.126	1.055	1.067	1.002	1.129	1.058	1.92842e-06	0.00424845	0.00147981	0.91998	8.79541e-07	0.00138648	9542.8	10745.4	10067.8	9520	1.16	2.49	1.07	1.91	1	44	118	44	36	174.2	6.15	0	300.791	9440.6	9573.2	9512.5	9702.1	10427.5	10745.4	11056.5	10495.2	10910.7	10107.5	10019.2	10251.7	10028.3	9238.2	9642.5	9447.4	9593.2	8660.4	9070.8
Q9VPX6	Adenylyl cyclase-associated protein OS=Drosophila melanogaster OX=7227 GN=capt PE=1 SV=2	1.167	1.091	1.07	1.013	1.182	1.105	1.95224e-06	0.00110865	0.00629752	0.635337	4.52146e-07	0.000151749	9929.9	11589.4	10829.4	9800.8	1.19	3.28	2.27	2.82	1	23	104	23	38	84.4	5.19	0	161.854	9784	9893.9	10064.2	9966.1	11589.4	11432	12261.3	11287.5	11837.2	10891.2	10655.3	11225.9	10767.9	9318.8	9936.6	9754.2	9847.6	8975.4	9374.5
Q9V9S4	FI21844p1 OS=Drosophila melanogaster OX=7227 GN=Dmel\CG2003 PE=2 SV=1	0.829	0.914	0.906	1.034	0.857	0.946	1.96697e-06	0.0135107	0.000484338	0.561311	1.19093e-05	0.142386	580.7	481.1	531	561.5	0.93	4.89	1.12	3.65	1	3	6	3	7	53.6	8.29	0	14.71	581.9	587.8	574.9	579.5	491.5	481.1	441.6	491.1	452.7	533	529	541.7	528.9	577.2	545.3	584.8	546.3	533.8	557
Q9W265	Probable hydroxyacid-oxoacid transhydrogenase, mitochondrial OS=Drosophila melanogaster OX=7227 GN=T3dh PE=2 SV=1	0.758	0.923	0.821	0.987	0.748	0.912	1.98115e-06	0.0658269	0.000110643	0.968348	1.12577e-06	0.0293869	944.7	715.9	872.2	956.9	3.86	4.27	3.63	4.57	1	4	6	4	12	50	7.31	0	14.95	954	935.5	903.8	991.2	711.7	767.3	715.9	760.8	698	845.9	844.6	901	899.4	1006	914.5	985.2	929.3	875.1	886.4
Q9W2Y4	RNA-binding protein NOB1 OS=Drosophila melanogaster OX=7227 GN=Dmel\CG2972 PE=1 SV=2	0.762	1.014	0.752	0.973	0.742	0.986	1.99624e-06	0.999963	1.88256e-06	0.851261	7.38208e-07	0.871524	3147.1	2399.4	3190.9	3234.6	4.08	6.04	1.35	4.8	1	13	27	13	30	53.8	4.92	0	67.643	3352.2	3152.1	3043.2	3142	2481.3	2209.4	2273.7	2558.7	2399.4	3112.3	3194.6	3207.3	3187.2	3466.7	3236.6	3232.6	3089.2	3075.2	2986.6
Q4V6M1	Bis(5'-nucleosyl)-tetraphosphatase [asymmetrical] OS=Drosophila melanogaster OX=7227 GN=Datp PE=1 SV=1	0.832	0.972	0.856	1.041	0.867	1.012	2.02871e-06	0.586605	1.15865e-05	0.481774	1.50894e-05	0.997711	1034.6	860.9	1005.7	993.4	2.83	3.4	1.42	3.17	1	4	15	4	24	16.6	5.38	0	20.318	1030.3	1038.9	997.3	1068.3	860.9	824.3	860.8	906.9	868.4	1009.3	991.2	1002.2	1025.4	977.6	990.8	1049.9	996.1	945.1	984.4
Q9VH96	GH26575p OS=Drosophila melanogaster OX=7227 GN=Nepl12 PE=2 SV=1	0.789	0.989	0.798	0.989	0.78	0.978	2.05417e-06	0.984395	3.24612e-06	0.620082	4.59428e-07	0.421627	131.4	103.6	129.9	132.9	4.44	3.74	2.14	4.93	1	2	2	2	4	80.8	6.39	0	3.868	136.2	135.9	127.1	125	105	102.2	95.8	105	103.6	132.8	129.5	130.4	126.1	131.2	145.4	134.5	131.4	124.9	128.7
Q9VAH2	LD33331p OS=Drosophila melanogaster OX=7227 GN=Rnb PE=2 SV=2	1.219	1.017	1.199	0.986	1.202	1.002	2.05519e-06	0.935589	4.41854e-06	0.999091	2.44325e-06	0.968789	793.3	967.2	806.3	804.6	3.28	2.73	3.05	2.51	1	14	15	14	18	110.6	5.77	0	34.667	775	774.3	825.7	811.9	909.9	970.4	967.2	970.2	964.1	834.1	817.6	778.3	795.2	809.1	770.3	800.2	815.6	711	733.6
Q9VNE9	Large ribosomal subunit protein uL13 OS=Drosophila melanogaster OX=7227 GN=RpL13A PE=1 SV=1	0.89	0.927	0.96	1.03	0.916	0.955	2.07285e-06	0.000167134	0.0612043	0.232571	3.48537e-05	0.00518757	10637	9466.6	9862.8	10330.4	1.57	1.83	1.35	2.16	1	13	72	13	45	23.6	11.03	0	59.299	10658.2	10799.5	10615.8	10396.4	9288.1	9636.4	9422.3	9724.8	9466.6	9944.8	9903	9645.9	9822.8	10490.2	10158.3	10600.4	10173	9777.4	10232.7
Q9VJ45	UDP-glucuronosyltransferase OS=Drosophila melanogaster OX=7227 GN=Ugt36E1 PE=2 SV=2	1.533	1.362	1.125	1.18	1.808	1.607	2.09286e-06	9.23009e-05	0.123689	0.0213569	4.55353e-08	9.81236e-07	1740	2667.2	2370	1475	4.99	7.17	4.45	8.69	1	12	25	12	23	57.6	8.69	0	56.822	1634.3	1730.6	1846.2	1749.5	2566.8	2667.2	2752.5	2359.2	2854	2443	2299.1	2472.4	2258.3	1340	1465.7	1484.3	1654.4	1499.2	1639.7
Q9VGL0	LD43047p OS=Drosophila melanogaster OX=7227 GN=Dmel\CG14712 PE=1 SV=3	1.306	0.989	1.321	0.983	1.284	0.972	2.13689e-06	0.672142	5.28043e-07	0.972318	3.74986e-06	0.427344	2065.5	2697.4	2042.2	2101.2	4.57	4.69	2.57	3.76	1	24	43	24	21	129.8	10.14	0	122.89	2016.3	2044.6	2231.7	2086.6	2588.3	2697.4	2798.9	2550.7	2839.2	2066.4	2066.2	1956.2	2018.5	2134.2	2068.7	2050.5	2226.7	1849.6	1937.3
Q9VC63	FI20190p1 OS=Drosophila melanogaster OX=7227 GN=Cftr PE=1 SV=2	0.859	0.927	0.926	0.997	0.856	0.925	2.16394e-06	0.0186185	0.000405876	0.998357	1.75584e-06	0.0138048	4058.5	3484.5	3761.7	4068.9	1.77	2.57	3.37	2.35	1	31	59	29	23	157	6.79	0	160.276	4028.9	4131.2	4088.2	3966.2	3547.3	3354.9	3484.5	3363.3	3515.4	3993.5	3708.8	3782.6	3741.1	4157.3	4138.3	3968	4000.7	3696	3914.4
A0A0B4LID7	Uncharacterized protein, isoform C OS=Drosophila melanogaster OX=7227 GN=ClpX PE=1 SV=1	0.845	0.91	0.929	0.993	0.839	0.903	2.164e-06	0.00073736	0.0116124	0.996587	2.83944e-06	0.00105493	4038.4	3411	3673	4067.8	2.69	2.7	1.45	2.98	1	27	64	27	54	71.6	7.46	0	165.911	4068.1	4170.9	3911.1	4008.9	3405.9	3447.7	3411	3605.4	3365.4	3732.7	3647.4	3613	3698.8	3848.5	4070.8	4064.9	4115.4	3731.9	3952
Q03334	Small ribosomal subunit protein uS15 OS=Drosophila melanogaster OX=7227 GN=RpS13 PE=1 SV=3	0.804	0.951	0.845	1.051	0.845	0.999	2.17715e-06	0.149885	5.71958e-05	0.156571	5.48192e-05	0.999993	7147.1	5742.9	6794	6799.7	2.73	4.69	1.41	4.23	1	8	61	8	50	17.2	10.55	0	45.095	7372.4	7013	6979.9	7283.7	5746.6	5742.9	5548.1	6139.3	5434.8	6612.4	6789	6816.3	6799.1	6770.6	6828.9	7071	6381.2	6763.1	6644.9
Q9VG01	RE12073p OS=Drosophila melanogaster OX=7227 GN=Dmel\CG46280 PE=1 SV=1	0.826	0.879	0.939	0.989	0.816	0.869	2.19808e-06	0.000579401	0.0156503	0.82871	7.62501e-07	0.000144872	3160.4	2609.5	2779.4	3196.8	3.14	4.11	1.9	2.42	1	15	27	15	24	58.8	6.15	0	62.596	3205.7	3167.1	2983.8	3153.7	2705.8	2609.5	2499.7	2617.3	2437.1	2826.1	2801.4	2706.3	2757.5	3086.8	3223.2	3265.6	3170.6	2940.8	3000.8
Q9W5T4	RE33981p OS=Drosophila melanogaster OX=7227 GN=anon-EST:Posey268 PE=1 SV=2	0.831	0.865	0.961	1.001	0.832	0.866	2.25807e-06	6.29837e-05	0.209093	0.999764	2.52226e-06	7.16451e-05	2159.3	1795	1868.3	2157.5	1.01	4.65	1.84	2.39	1	17	27	17	37	79.7	5.99	0	86.968	2149.1	2169.5	2188.7	2139.8	1831.7	1655.6	1795	1879.2	1789.9	1825.3	1882.6	1904.6	1854.1	2108.3	2196.1	2208.6	2119.6	1971.5	2055.6
Q7YZA2	Uncharacterized protein CG7065 OS=Drosophila melanogaster OX=7227 GN=CG7065 PE=1 SV=1	0.835	0.928	0.9	1.095	0.914	1.016	2.27475e-06	0.0318837	0.00026065	0.00859474	0.000921424	0.887954	2667.2	2226.8	2475.3	2435.1	2.37	2.72	2.19	3.36	1	31	51	31	30	136.7	9.23	0	132.349	2701.1	2677.3	2558.2	2657.1	2247	2226.8	2179.9	2212.9	2341.5	2449.4	2469.2	2481.4	2572.5	2401.8	2469	2573.6	2395.6	2477.8	2536.8
F0JAP7	LP18071p OS=Drosophila melanogaster OX=7227 GN=CG15347-RB PE=1 SV=1	2.23	1.449	1.538	1.053	2.348	1.526	2.29371e-06	0.0117692	0.000684268	0.855007	8.49014e-07	0.00278726	304.8	679.6	441.8	289.4	9.53	14.32	13.23	13.67	1	2	4	2	7	25	8.03	0	6.689	339.3	324.2	278.5	286.6	679.6	628.4	758.9	831.6	583.7	359	440.2	498.9	443.4	303.9	328.6	275.7	237.5	311.3	307.2
P39736	Puff-specific protein Bx42 OS=Drosophila melanogaster OX=7227 GN=Bx42 PE=1 SV=1	1.236	0.96	1.287	1.019	1.26	0.979	2.2988e-06	0.367375	3.00412e-07	0.878306	9.07984e-07	0.780515	1829.2	2260	1756.6	1794.3	1.78	2.48	5	3.93	1	17	28	17	35	61.1	9.38	0	84.8	1780.5	1850.9	1845	1813.5	2260	2352	2222	2208.6	2264.9	1849.6	1764.9	1636.7	1748.4	1778.8	1701.9	1810	1871	1633.3	1753.8
A0A0B4K7I2	Smooth, isoform T OS=Drosophila melanogaster OX=7227 GN=sm PE=1 SV=1	0.775	0.818	0.947	1.113	0.862	0.91	2.32163e-06	3.16003e-05	0.428889	0.0160799	0.000514032	0.0116824	1816.6	1407.4	1485.8	1632.6	3.21	5.31	2.15	4.13	1	10	19	10	22	60.9	8.78	0	68.501	1895.9	1820.5	1753.6	1812.8	1451.5	1407.4	1389.4	1533.8	1331.4	1478.8	1516.6	1440.5	1492.8	1657.5	1585.1	1738.9	1608.1	1739.3	1724.9
Q7K5K0	GH09064p OS=Drosophila melanogaster OX=7227 GN=Gasz PE=2 SV=1	0.885	1.009	0.877	0.936	0.829	0.945	2.34191e-06	0.6444	5.42832e-07	0.00100751	9.88313e-09	0.00834044	1878.7	1662.2	1896.4	2006.3	1.29	1.78	0.76	3.3	1	15	27	14	32	52.4	7.85	0	65.341	1887.1	1884.4	1834.8	1872.9	1631.4	1662.2	1610.3	1674.5	1678.4	1900.2	1890.8	1892.6	1922.1	2026.9	1936.7	1985.9	2093.6	1731.2	1785.5
P11584	Integrin beta-PS OS=Drosophila melanogaster OX=7227 GN=mys PE=1 SV=3	1.267	1.09	1.163	1.066	1.351	1.162	2.36525e-06	0.0251129	0.0003441	0.209527	1.99134e-07	0.000614123	3295.3	4175.3	3590.6	3091.2	2.47	4.05	2.43	4.66	1	16	27	16	23	92.6	5.97	0	73.686	3380.1	3322.1	3268.6	3188.9	4175.3	3853.3	4048.3	4273.2	4211.8	3462.2	3594.5	3672.7	3586.6	3035.5	3316.2	3148	2989.3	3100.7	3147.7
Q7K172	CAAX prenyl protease OS=Drosophila melanogaster OX=7227 GN=ste24a PE=1 SV=1	1.141	0.97	1.176	1.068	1.219	1.036	2.3689e-06	0.168209	1.71167e-07	0.00241853	1.57385e-08	0.129364	3645.9	4161.2	3537.6	3415	1.36	1.86	1.26	2.98	1	11	26	11	25	51.6	8.16	0	49.521	3649.6	3620.8	3734.4	3642.3	4056.4	4194	4222.8	4058.7	4161.2	3557.6	3514.1	3610.1	3517.7	3362.2	3468.6	3564.2	3343.5	3348	3430.7
Q9W0M4	Endoplasmic reticulum transmembrane protein OS=Drosophila melanogaster OX=7227 GN=Dmel\CG13887 PE=1 SV=1	1.164	1.041	1.118	1.038	1.208	1.081	2.38023e-06	0.18066	5.30711e-05	0.102811	1.24823e-07	0.00205492	3851.6	4482.8	4011.4	3710.6	1.85	2.91	2.59	2.65	1	12	31	12	39	26.1	9.32	0	62.93	3801.7	3828	3875.3	3964.9	4482.8	4419.9	4735.7	4588.5	4432.2	3917	3964.7	4152.2	4058.6	3567.1	3794.6	3742.4	3679	3487.5	3627.1
Q9VD14	GH07286p OS=Drosophila melanogaster OX=7227 GN=Dmel\CG13850 PE=1 SV=3	0.793	1.008	0.787	0.937	0.743	0.944	2.39584e-06	0.964316	1.31916e-06	0.057744	8.86052e-08	0.129521	4733.3	3752.4	4768.9	5053.4	1.55	5.7	2.15	1.88	1	22	50	22	51	61.8	9.13	0	126.052	4771.5	4683.5	4695.4	4841.8	3889.9	3679.4	3752.4	4195.4	3668.8	4745.5	4952	4723.4	4792.5	5078.4	5028.3	5230.3	5028.5	4377.2	4437.7
Q8T5S8	procollagen-proline 4-dioxygenase OS=Drosophila melanogaster OX=7227 GN=PH4alphaPV PE=2 SV=1	0.597	0.815	0.733	1.07	0.639	0.872	2.40817e-06	0.0238698	0.00036993	0.337016	2.80364e-05	0.416977	1609.3	961	1311.3	1503.9	3.53	9.94	4.43	12.76	1	15	27	15	34	59.6	8.46	0	70.594	1575.4	1708.3	1611.3	1607.2	961	965.4	898.5	1082.3	827.6	1394.6	1282.8	1266.1	1340.5	1231.7	1616.1	1618	1399.5	1445.2	1618.6
Q8MM24	Chitinase-like protein Idgf1 OS=Drosophila melanogaster OX=7227 GN=Idgf1 PE=1 SV=2	1.335	1.037	1.288	0.883	1.179	0.915	2.42733e-06	0.641691	1.23671e-05	0.0145164	0.000603091	0.121143	360.4	481.3	373.8	408.3	2.42	7.4	5.98	2.67	1	8	10	8	21	49.3	7.25	0	26.38	354.8	366.1	349.6	367.5	475.2	557.3	481.3	505.6	465.5	360.3	354.3	401.8	387.7	425.3	412.6	404	400.8	325.5	346.9
M9PHI7	Uracil phosphoribosyltransferase homolog OS=Drosophila melanogaster OX=7227 GN=kri PE=1 SV=1	0.843	0.95	0.887	1.034	0.871	0.982	2.47251e-06	0.0814081	0.000120118	0.366726	2.62739e-05	0.770002	802.3	676.1	761.9	776	4.07	2.41	1.81	2.64	1	4	9	4	15	28.8	5.92	0	27.5	838.3	781	770.9	824.2	655.2	665.2	678.8	698.5	676.1	745.7	768.2	755.7	777.1	753.1	783.3	801.2	768.8	769	740
Q9VDZ7	Mitochondrial import inner membrane translocase subunit TIM44 OS=Drosophila melanogaster OX=7227 GN=CG117799 PE=1 SV=1	0.824	0.935	0.881	0.992	0.817	0.927	2.50264e-06	0.0423686	0.000226003	0.977229	1.49966e-06	0.0204714	6869.7	5658.6	6424.3	6927.3	2.52	3.49	2.4	2.38	1	24	69	24	50	52.8	8.38	0	172.314	6974.6	6921.8	6586.6	6818.1	5646.1	5880.9	5512.2	6011.8	5658.6	6503.8	6600.9	6258.6	6345.8	6977.5	7014	6877.3	6649.6	6398.2	6558.5
Q9VLP6	LD46912p OS=Drosophila melanogaster OX=7227 GN=Dmel\CG7810 PE=2 SV=1	1.272	1.056	1.205	0.918	1.168	0.969	2.51695e-06	0.083172	0.00012038	0.0178997	0.000517394	0.826498	122.5	155.8	129.3	133.4	8.08	2.79	2.16	1.85	1	5	9	5	16	42	4.58	0	22.039	126.1	105.2	120.1	124.9	152.5	155.5	156.9	155.8	164.3	128	132.4	126.1	130.6	133.1	133.8	135.1	129.4	115.7	99.7
M9MS48	Rbp1-like, isoform B OS=Drosophila melanogaster OX=7227 GN=Rbp1-like PE=4 SV=1	0.605	0.843	0.718	0.995	0.602	0.839	2.61232e-06	0.088082	0.00011946	0.869382	9.97795e-07	0.0225609	432.9	261.7	364.8	434.9	8.53	9.91	4.47	4.61	1	7	24	1	20	25.9	10.43	0	45.835	441.4	441.2	366.1	424.6	261.7	238.6	277.1	298.7	237.5	357.9	371.8	342.5	379.3	411.2	428.3	458.5	441.6	404.9	418.1
Q95TL8	LD41494p OS=Drosophila melanogaster OX=7227 GN=ERp44 PE=1 SV=1	1.109	1.032	1.074	1.051	1.165	1.085	2.68368e-06	0.0516378	0.000205243	0.0116288	3.96306e-08	8.18358e-05	6660.3	7383.7	6876.4	6338.6	1.96	1.05	0.65	2.48	1	17	55	17	37	47	5.97	0	89.13	6533.1	6569.8	6796	6752	7290.9	7383.7	7486.1	7309.8	7385.3	6891.7	6955.9	6861.1	6861.1	6248.4	6589.6	6411.1	6266.8	5993.2	6225
Q9VV59	Nondiscriminating glutamyl-tRNA synthetase EARS2, mitochondrial OS=Drosophila melanogaster OX=7227 GN=GluRS-m PE=3 SV=1	0.834	0.943	0.885	1.039	0.867	0.979	2.71364e-06	0.0936166	0.000118225	0.710408	1.17994e-05	0.46381	803.9	670.6	757.9	773.9	2.03	4.16	0.9	2.59	1	11	15	11	27	58.5	7.75	0	41.004	800.8	807	774.9	811.1	644.4	673.3	657.5	718.6	670.6	755.2	767.2	751.5	760.6	776.6	767.4	811.6	771.2	734.6	764.6
Q7JW66	LD21545p OS=Drosophila melanogaster OX=7227 GN=cg12129 PE=1 SV=1	1.245	1.228	1.014	1.152	1.435	1.415	2.71624e-06	8.59309e-06	0.968304	0.000213903	4.86103e-09	1.34817e-08	4231	5268.3	5193.8	3671.1	1.68	2.93	2.34	5.52	1	16	42	16	37	40.3	6.98	0	74.323	4220.9	4350.2	4241	4184	5166.4	5353.4	5268.3	5009.3	5387.1	5312.9	5029.1	5234.1	5153.8	3863.8	3508.5	3494.9	3841.3	3872.1	4121.9
Q9I7L4	MAGE OS=Drosophila melanogaster OX=7227 GN=MAGE PE=1 SV=1	0.775	1.14	0.679	0.948	0.734	1.08	2.73673e-06	0.0111334	3.92877e-08	0.362843	3.45911e-07	0.215858	1354.8	1049.3	1544.4	1429.9	2.59	5.76	4.31	2.47	1	6	10	6	33	26.4	7.12	0	30.49	1363.2	1417.2	1338.6	1346.5	1108	1049.3	1027.4	1126.7	976.6	1589.7	1436.2	1555.8	1533.1	1482.4	1406	1411.7	1448.3	1250.5	1342.8
Q9VGW7	Arginine methyltransferase 1 OS=Drosophila melanogaster OX=7227 GN=Art1 PE=1 SV=1	0.86	1.009	0.852	1.005	0.865	1.014	2.75072e-06	0.857541	1.01324e-06	0.998317	3.41756e-06	0.776246	6327.8	5443.9	6385.8	6297	2.02	1.49	2.69	3.22	1	12	50	12	36	42.8	5.15	0	94.91	6424.8	6379.7	6137.5	6276.4	5387.5	5355.7	5443.9	5487.3	5560.7	6603.8	6367.7	6403.9	6184.9	6321.7	6272.4	6033.6	6526.5	5893.9	6044.9
Q9VCH5	Nuclear pore complex protein Nup98-Nup96 OS=Drosophila melanogaster OX=7227 GN=Nup98-96 PE=1 SV=3	1.108	1.057	1.048	1.015	1.125	1.074	2.75077e-06	0.00284274	0.00375966	0.32724	3.18465e-07	0.000143428	11735.5	13008.1	12410.1	11558.8	1.97	1.32	1.06	1.8	1	61	164	61	42	210	6.52	0	382.135	11631.4	11674.5	12145.2	11796.9	13008.1	12946.7	13100.2	12728	13175.9	12299.8	12299.5	12521.4	12531.3	11569.8	11354.4	11547.8	11860	10670.2	11061.7
Q9Y143	BcDNA.GH05536 OS=Drosophila melanogaster OX=7227 GN=Jhbp14 PE=1 SV=1	2.232	1.019	2.191	0.975	2.176	0.993	2.8642e-06	0.999945	2.67421e-06	0.995266	3.90304e-06	0.991414	74	165.1	75.4	75.9	9.59	11.43	5.72	22.37	1	5	5	5	26	29.6	6.01	0	11.734	73.2	66.2	83.6	74.8	169.5	165.1	158.1	154.5	203.2	67.8	74.6	76.2	77.1	96.4	87.1	66.1	59.7	67.2	62.7
B7YZT2	Mitochondrial fission 1 protein OS=Drosophila melanogaster OX=7227 GN=Fis1 PE=2 SV=1	1.203	1.205	0.998	0.933	1.121	1.124	2.8658e-06	3.22992e-06	0.978913	0.0621707	0.000187242	0.000171236	1277.2	1536	1539	1369.7	2.06	3.12	2.51	3.02	1	6	17	6	36	17.8	5.99	0	31.681	1267.1	1281.8	1272.7	1325.4	1536	1442.4	1559	1555.7	1525.4	1523.5	1485.9	1574.2	1554.7	1384.2	1395.9	1355.3	1303.8	1162.4	1214.6
Q9VQX4	Nicotinate phosphoribosyltransferase OS=Drosophila melanogaster OX=7227 GN=Naprt PE=2 SV=2	0.848	0.821	1.033	0.971	0.824	0.797	2.88538e-06	6.38238e-07	0.300717	0.468874	4.58782e-07	1.30505e-07	3443.3	2919.9	2825.6	3544.4	1.6	4.48	0.52	1.37	1	15	33	15	29	62.1	6.8	0	76.089	3497.3	3481.4	3386	3405.6	2931.4	2919.9	2744.2	2911	3113.6	2810.8	2818.4	2832.8	2843.8	3578.8	3490.2	3510.4	3587.4	3208.3	3298.6
A1Z7T0	Serine/threonine-protein kinase N OS=Drosophila melanogaster OX=7227 GN=Pkn PE=1 SV=1	0.828	0.745	1.111	1.412	1.169	1.053	2.89524e-06	1.15581e-07	0.016677	9.53242e-09	0.000122531	0.0749075	3670	3037.6	2735.1	2598.4	3.68	2.07	4.32	2.93	1	35	62	35	33	131.7	6.93	0	176.435	3707.9	3823.7	3502.2	3632.4	2930.3	3037.6	3063.4	3055.4	2951.3	2965.2	2707.7	2740	2730.2	2623.9	2549.1	2573.2	2721.9	3401.4	3623
E1JJ52	FI17814p1 OS=Drosophila melanogaster OX=7227 GN=plx PE=2 SV=1	1.172	0.884	1.326	1.187	1.391	1.049	2.89622e-06	0.000144906	4.13047e-09	6.03788e-06	8.02717e-10	0.169848	231.1	270.8	204.2	194.7	3.32	3.35	2.69	1.45	1	11	13	11	8	175	7.59	0	34.258	234.8	227.4	239.8	222.5	276.5	270.7	270.8	266	289.9	200.2	197.8	208.3	208.4	193.4	196	191.6	198	215.4	215.5
Q5LJQ3	Uncharacterized protein, isoform C OS=Drosophila melanogaster OX=7227 GN=BcDNA:LD29015 PE=1 SV=1	1.382	0.966	1.43	0.93	1.285	0.899	2.9528e-06	0.449544	4.49335e-07	0.330891	3.63115e-05	0.0260574	93.2	128.7	90	100.2	5.47	2.43	6.24	6.31	1	2	2	2	22	13.7	8.65	0	13.327	93	88.2	93.3	100.7	128.7	124.5	130.6	127.2	132.6	93.7	81	91.2	88.9	103.6	96.9	93.1	107.1	85.3	83.6
P27716	Innexin inx1 OS=Drosophila melanogaster OX=7227 GN=ogre PE=1 SV=1	0.824	1.113	0.74	0.951	0.784	1.059	2.97171e-06	0.00270263	1.96345e-08	0.327077	3.40301e-07	0.0671094	1933	1591.8	2151.1	2031.6	2.52	3.74	2.79	4.01	1	10	19	10	23	42.6	8.88	0	46.387	1961.8	1948.3	1917.8	1853.2	1627.1	1509.5	1493.5	1595.6	1591.8	2120.7	2066.2	2181.9	2196.3	2063.6	2058.7	2005	1890.8	1799.7	1846
P48608	Protein diaphanous OS=Drosophila melanogaster OX=7227 GN=dia PE=1 SV=2	1.16	1.019	1.139	1.015	1.178	1.034	2.97289e-06	0.807749	1.00858e-05	0.395395	4.01021e-07	0.101837	3841.6	4457.3	3912.7	3785	2.15	3.09	0.83	1.53	1	33	50	33	33	123.1	8.12	0	153.075	3785.1	3968.9	3876.5	3807	4502.1	4231.8	4457.3	4544.7	4292.6	3916.9	3951.2	3908.6	3872.5	3678.6	3778.3	3791.6	3804.9	3472.3	3760.6
Q24491	RNA-binding protein Rsf1 OS=Drosophila melanogaster OX=7227 GN=Rsf1 PE=1 SV=1	0.841	0.88	0.956	1.104	0.928	0.971	3.08064e-06	0.000684038	0.0213345	0.00355912	0.00349015	0.781968	1482.8	1247.3	1304.8	1343.7	3.7	2.48	3.95	1.61	1	10	19	10	44	21.1	10.56	0	42.781	1544.8	1480.8	1410.9	1484.8	1210.3	1189	1247.5	1262.5	1247.3	1278.6	1325	1285	1392.2	1355.1	1325.7	1332.3	1373.2	1417.1	1403
A1Z7S3	Rab32, isoform B OS=Drosophila melanogaster OX=7227 GN=Rab32 PE=1 SV=1	1.322	1.188	1.113	0.977	1.292	1.161	3.13349e-06	0.000803321	0.0182297	0.840586	9.7025e-06	0.00341813	1457	1926.4	1730.9	1491.1	3.67	5.69	2.51	2.62	1	9	18	9	15	74.7	6.23	0	52.377	1430.4	1466.7	1552.1	1447.4	1957.4	1918.3	1926.4	1700.3	1950.5	1723.9	1652.6	1737.8	1747.8	1494.3	1487.9	1487.4	1568.6	1312.2	1389.7
Q9VFK6	Histone-lysine N-methyltransferase Set8 OS=Drosophila melanogaster OX=7227 GN=Set8 PE=1 SV=2	1.426	0.925	1.542	1.071	1.527	0.99	3.13659e-06	0.31842	3.48711e-07	0.335459	3.64169e-07	0.999979	902.2	1286.6	834.4	842.6	3.71	7.35	3.77	7.75	1	17	29	17	25	76.4	7.37	0	75.257	865.9	882.7	937.7	922.3	1237	1286.6	1381.3	1197.3	1425	874.3	833.6	835.2	797.2	883.6	764.1	803.5	900.5	794.3	836.3
Q9VVW7	Canopy b OS=Drosophila melanogaster OX=7227 GN=CNPYb PE=1 SV=2	1.415	1.012	1.397	1.101	1.558	1.115	3.14808e-06	0.999975	2.98425e-06	0.0410395	9.02413e-08	0.044143	1283.8	1816.1	1299.7	1165.9	4.33	3.98	8.8	3.41	1	7	12	7	37	25.6	6.33	0	24.949	1286.4	1272.5	1392.7	1281.3	1787	1816.1	1878.6	1713.3	1891	1185.2	1253.3	1450.1	1347.8	1208.4	1156.6	1175.4	1113.3	1180.1	1205.7
Q9Y113	Negative elongation factor B OS=Drosophila melanogaster OX=7227 GN=NELF-B PE=1 SV=1	0.732	0.87	0.841	1.083	0.792	0.942	3.15916e-06	0.0140882	0.000890836	0.109374	0.000123029	0.667778	1277.6	934.8	1111.6	1180.1	2.77	6.9	1.48	7.36	1	7	15	7	15	67.9	6.68	0	32.393	1266.6	1330.8	1248.3	1288.6	934.8	833.1	942.4	1006.5	897.1	1136.8	1098.2	1107.6	1115.7	1051.8	1258.6	1188.5	1171.8	1161.9	1260.9
Q7K569	Glycerol-3-phosphate dehydrogenase OS=Drosophila melanogaster OX=7227 GN=Gpo1 PE=1 SV=1	1.336	1.071	1.247	1.1	1.47	1.178	3.21177e-06	0.381876	3.39382e-05	0.0192304	5.97763e-08	0.000983042	4757	6354.4	5094.1	4323.7	5.67	4.15	2.9	5.97	1	22	46	22	31	80.4	7.65	0	100.856	4786.3	4727.9	5182.4	4532.3	6173.6	6164.1	6675.7	6715.6	6354.4	4890.5	5121.3	5245.1	5067.1	3923.8	4354.2	4293.4	4531.2	4390.8	4479.8
Q9W259	FI23916p1 OS=Drosophila melanogaster OX=7227 GN=13506 PE=1 SV=2	1.376	0.955	1.44	1.128	1.551	1.078	3.2623e-06	0.625283	7.04888e-07	0.055079	1.10229e-07	0.381818	1211.6	1666.6	1157.6	1074.2	2.14	9.63	1.28	4.58	1	8	12	8	19	57	5.33	0	36.823	1187.4	1245.8	1223.9	1199.4	1761.3	1557.8	1666.6	1638.2	1989.4	1150.4	1136.6	1169.1	1164.9	1146.2	1083.3	1065.3	1027.7	1089.3	1180.4
Q95RI5	Failed axon connections OS=Drosophila melanogaster OX=7227 GN=fax PE=1 SV=1	1.372	0.965	1.421	1.016	1.393	0.98	3.26547e-06	0.651043	7.43492e-07	0.949099	1.63778e-06	0.916264	6078.8	8340.1	5867.8	5985.3	2.41	6.8	3.83	7.4	1	20	61	20	48	47.1	5.25	0	94.295	6205.4	6022.5	6135.6	5871.4	9306.2	8340.1	7802.8	8328.1	8905.5	5453.5	5868.3	5938.3	5867.3	6037.5	5933.6	6430.3	5365.1	5692.5	5706.4
Q868Z9	Papilin OS=Drosophila melanogaster OX=7227 GN=Ppn PE=1 SV=2	1.599	0.818	1.956	1.125	1.798	0.919	3.289e-06	0.0206088	6.32554e-08	0.422434	4.6558e-07	0.297188	1971.8	3153.3	1612.1	1753.4	7.25	9.83	8.18	6.03	1	16	37	16	6	312.8	4.58	0	68.792	2055.6	2080.6	1891.5	1781.2	3153.3	3244.4	3023	2812.1	3654.9	1443.7	1580.9	1759.1	1644.1	1936.2	1770.4	1736.5	1688.7	1885.7	1971.4
Q9VIW5	LD41874p OS=Drosophila melanogaster OX=7227 GN=Dmel\CG10237 PE=1 SV=2	0.789	1.201	0.657	0.956	0.754	1.148	3.29211e-06	0.000529352	8.89019e-09	0.780044	9.87456e-07	0.00272888	4166.2	3286.7	5002.7	4359.2	2.67	7.02	2.08	3.69	1	14	30	14	35	37.6	8.43	0	66.178	4111.2	4173.1	4159.3	4366	3384.3	2969.6	3286.7	3374.5	2924.6	4970.5	4930.5	5035.1	5169.3	4142.3	4266.2	4479.6	4454.2	3771.4	3954
D3DMU9	MIP17260p OS=Drosophila melanogaster OX=7227 GN=Prip PE=1 SV=1	1.517	0.944	1.608	1.145	1.737	1.081	3.3002e-06	0.827085	1.10849e-06	0.181109	2.37684e-07	0.56673	3058.9	4640.6	2886.2	2671.1	7.09	10.52	2.98	7.25	1	4	17	4	18	29	7.23	0	32.508	3044.4	3073.5	3193.6	2698.3	5333.5	4577.3	4640.6	4187.6	5341.4	2735.3	2929.6	2884.6	2887.7	2887.1	2708.6	2634.1	2420.8	2792.8	2912.2
Q9VMU0	NADH dehydrogenase [ubiquinone] iron-sulfur protein 6, mitochondrial OS=Drosophila melanogaster OX=7227 GN=ND-13A PE=1 SV=1	1.534	0.818	1.876	1.191	1.827	0.974	3.31185e-06	0.00157684	1.59354e-08	0.00668274	3.44223e-08	0.849449	697	1069.4	569.9	585.3	11.71	2.87	2.37	6.86	1	3	8	3	21	14.3	8.57	0	10.501	734.8	661.1	833.7	651.1	1069.4	1114.4	1049.5	1036.7	1086.9	573.1	554	566.8	586.5	568.7	555.1	646.4	602.4	674.1	626.4
P53777	Muscle LIM protein 1 OS=Drosophila melanogaster OX=7227 GN=Mlp60A PE=2 SV=1	2.361	0.787	3.002	1.035	2.443	0.814	3.32556e-06	0.160358	2.19848e-07	0.983575	2.08601e-06	0.276993	605.6	1429.9	476.4	585.3	9.98	17.08	9.97	9.83	1	4	10	3	55	10	8.24	0	26.406	526.3	634.5	660.4	578.1	1429.9	965.7	1353.3	1572.9	1452.4	467.1	485.9	435.4	550	545.5	627.9	517.4	628.2	482.8	601.2
A0A0B4LH29	Uncharacterized protein, isoform B OS=Drosophila melanogaster OX=7227 GN=CG9480 PE=1 SV=1	1.496	1.183	1.264	0.871	1.303	1.031	3.33256e-06	0.0313507	0.000438959	0.0261902	0.000522385	0.999633	1734.6	2595.4	2052.9	1992.1	4.89	8.12	5.61	5.13	1	17	43	17	48	49.7	6.11	0	117.198	1664.8	1706.7	1862.4	1763	2709.7	2248.3	2496.9	2595.4	2781.2	1857.8	2027.7	2113.2	2078.4	2178.1	2015.3	1969.2	1948.4	1527.3	1617.1
Q9VZ01	RH44935p OS=Drosophila melanogaster OX=7227 GN=NdufV3 PE=1 SV=1	1.305	0.967	1.349	1.251	1.633	1.21	3.34355e-06	0.451495	5.03412e-07	4.25166e-05	2.37299e-09	0.000463078	629.3	821.2	608.7	502.9	6.51	4.36	3.77	2.95	1	3	7	3	27	10.9	9.61	0	18.133	616.4	642.5	685.5	588.6	893.5	798.3	819.6	824.3	821.2	571.6	598.8	620.2	618.8	512.6	488.9	493.4	519.7	565.4	608.8
A0A0B4KG35	Stretchin-Mlck, isoform U OS=Drosophila melanogaster OX=7227 GN=Strn-Mlck PE=1 SV=1	1.298	0.952	1.364	0.952	1.235	0.906	3.44984e-06	0.168424	2.34466e-07	0.365168	3.88673e-05	0.00840221	535.2	694.8	509.4	562.4	2.55	4.91	3.48	4.73	1	18	19	18	9	923.2	5.12	0	47.59	533	557.6	537.4	525.4	706.6	668.3	645.3	694.8	732.7	479.9	512.4	520.4	506.5	598.7	539.8	576	549.1	489	528.4
Q9VVH9	Solute carrier organic anion transporter family member 74D OS=Drosophila melanogaster OX=7227 GN=Oatp74D PE=2 SV=2	2.582	0.737	3.504	1.215	3.138	0.896	3.49995e-06	0.0916535	1.59024e-07	0.277395	3.42796e-07	0.897074	72.4	186.9	53.4	59.6	21.8	10.59	15.24	11.38	1	4	5	4	6	88.4	7.27	0	8.088	74.9	57.4	96.5	70	169.6	187	186.9	152.3	201.8	50.2	68.5	50.2	56.7	59.1	60	69.7	53	68.7	54.4
Q9VCC2	RE50040p OS=Drosophila melanogaster OX=7227 GN=Dmel\CG5510 PE=1 SV=1	1.216	1.037	1.173	1.024	1.245	1.062	3.56709e-06	0.786343	1.30396e-05	0.277662	3.48674e-07	0.0603161	1078.5	1311.5	1118	1053.1	3.94	2.96	2.82	3.19	1	6	14	6	18	37.6	6.87	0	23.848	1061	1088.1	1069	1155.8	1302.6	1322.9	1392.1	1294.3	1311.5	1127.4	1078	1152.8	1108.7	1002.6	1080.2	1042.8	1063.5	973.4	1031
Q8SXP8	GH09868p OS=Drosophila melanogaster OX=7227 GN=TBPH PE=1 SV=1	0.86	0.93	0.925	1.044	0.898	0.97	3.57034e-06	0.0105521	0.00140562	0.157841	9.95051e-05	0.449483	536.4	461.5	498.8	514	3	3.21	1.73	1.42	1	6	14	6	13	58	7.14	0	28.425	552.8	541.8	515.1	531	474.2	473.1	439.7	461.5	450.8	497.5	500.1	490.6	511.4	521.8	505.2	510.6	517.5	507.1	513.4
Q9W2K8	High mobility group protein 2 OS=Drosophila melanogaster OX=7227 GN=Hmg-2 PE=2 SV=1	1.643	1.129	1.454	1.073	1.763	1.212	3.60643e-06	0.266995	5.82388e-05	0.95149	1.82211e-06	0.116921	39.6	65.1	44.8	36.9	5.35	9.8	7.02	10.98	1	5	7	5	16	41.7	9.38	0	18.854	37.5	42.5	38.9	40.4	69.8	59.9	75.6	65.1	61.1	47.7	41.6	42.5	47.2	45	36	37.6	36.2	34.4	40.3
Q7K556	TRPL translocation defect protein 14 OS=Drosophila melanogaster OX=7227 GN=Ttd14 PE=1 SV=1	0.852	0.981	0.869	0.898	0.766	0.881	3.61204e-06	0.960724	6.99522e-06	0.00071751	1.11281e-08	0.000318994	3705.1	3158.5	3635.4	4125.4	1.59	2.99	2.57	3.58	1	17	33	17	40	54.3	8.47	0	97.374	3725.8	3684.5	3761.9	3625	3195.7	2962.8	3156.7	3158.5	3166.3	3799.2	3654.9	3616	3586.8	4250.9	4031.4	3947.4	4221.7	3417.9	3491.1
Q9VGA3	LD12305p OS=Drosophila melanogaster OX=7227 GN=Dmel\CG4115 PE=1 SV=2	2.072	0.698	2.968	1.098	2.274	0.766	3.64303e-06	0.0137019	5.45758e-08	0.965368	1.98581e-06	0.0319968	531.1	1100.3	370.7	483.8	8.21	19.07	4.17	18.35	1	5	9	5	25	25.3	7.58	0	25.483	583.1	542.4	520.1	478.6	1367.7	1100.3	1070.9	1029.9	1574.3	353.2	378.6	363	387.7	648.2	483.6	432.4	483.9	534.9	513.9
Q9VUE5	LD17962p OS=Drosophila melanogaster OX=7227 GN=stwl PE=1 SV=1	0.789	0.928	0.851	1.058	0.835	0.982	3.65165e-06	0.0379695	0.000411426	0.319833	4.83818e-05	0.581161	1565.7	1236	1453	1480	3.88	3.31	4.13	3.76	1	18	23	18	26	112.8	9.39	0	88.908	1648.5	1597.1	1534.8	1514.3	1274.8	1235.1	1227.6	1327.2	1236	1390.8	1499.4	1408	1505.6	1480.8	1459.8	1584.7	1479.2	1512.2	1513.3
Q7YU24	Transmembrane GTPase Marf OS=Drosophila melanogaster OX=7227 GN=Marf PE=1 SV=1	0.865	0.96	0.901	0.892	0.771	0.856	3.69335e-06	0.706999	1.67005e-05	0.000129426	4.53065e-09	2.57853e-05	3005.3	2598.4	2884.7	3369	2.08	2.46	3.51	2.3	1	25	50	25	35	91.3	6.71	0	179.496	2977.2	3033.6	2903.1	3034.8	2599	2497.1	2477	2605.4	2598.4	3082	2878.2	2863.8	2891.3	3392.8	3261.7	3345.4	3443.4	2731.2	2874.4
Q9W0G4	hydroxymethylbilane synthase OS=Drosophila melanogaster OX=7227 GN=Hmbs PE=1 SV=1	0.871	0.964	0.903	0.914	0.796	0.881	3.71385e-06	0.119438	0.00013797	0.00151375	1.68972e-08	3.11682e-05	2989.7	2603.2	2881.9	3270.9	2.08	3.41	2.04	1.77	1	15	33	15	25	68.9	6.89	0	67.825	3082.2	2968.3	3011.2	2938.1	2654.6	2603.2	2540	2664.8	2452.8	2932.8	2897.2	2794.7	2866.7	3300.3	3336.8	3207.6	3241.7	2827.5	2812.5
Q9XZJ4	Proteasome subunit alpha type-6 OS=Drosophila melanogaster OX=7227 GN=Prosalpha1 PE=1 SV=2	1.148	1.239	0.926	0.892	1.024	1.105	3.72247e-06	4.60026e-08	0.001906	0.000270133	0.0804459	4.68567e-05	6194	7110.2	7676	6945.2	2.51	1.61	1.47	3.32	1	15	50	15	58	27.1	7.66	0	77.706	6098.1	6150.8	6237.6	6452.8	7092.1	7126.6	7110.2	7075.2	7355.6	7687.9	7581.5	7851.3	7664	6540.4	7017.4	7029.7	6873.7	5594.1	5828
Q9VLB7	Rab GDP dissociation inhibitor OS=Drosophila melanogaster OX=7227 GN=Gdi PE=1 SV=1	0.923	0.966	0.956	1.031	0.952	0.996	3.75311e-06	0.0120731	0.00131539	0.0235509	0.000678989	0.982533	14781.6	13650.8	14272.4	14333	0.4	1.49	1.4	1.1	1	24	110	24	53	49.9	5.72	0	176.025	14816.3	14747.1	14696.7	14819.3	13584.3	13910.9	14030.1	13589.5	13650.8	14388.6	14157.1	14560.7	14142.8	14335.8	14569.5	14190	14330.1	13591.8	13973.1
Q9W130	Cytochrome P450 9c1 OS=Drosophila melanogaster OX=7227 GN=Cyp9c1 PE=2 SV=1	0.678	0.663	1.023	1.69	1.146	1.12	3.84842e-06	4.01096e-06	0.969529	2.58576e-07	0.0494577	0.13283	736.4	499.3	488.1	435.7	4.86	8.21	4	7.47	1	9	11	9	20	60.5	6.73	0	35.648	714.4	781.5	706.1	759.1	499.3	436.4	530	542.2	494.5	493.9	467.9	514.3	482.4	417.6	454.5	406.2	477.1	655.4	740.5
Q9VMD5	Lysophospholipid acyltransferase 7 OS=Drosophila melanogaster OX=7227 GN=frj PE=1 SV=1	1.111	1.032	1.077	1.124	1.249	1.16	3.87951e-06	0.430076	3.65109e-05	2.38594e-06	5.72388e-10	3.9148e-07	3370.5	3745.5	3478	2999.3	1.59	1.89	2.39	1.21	1	12	28	12	17	56.3	8.78	0	50.832	3336.8	3339.4	3401.9	3448.7	3745.5	3769.2	3892.2	3720.7	3721.6	3518.2	3331.1	3486.8	3469.2	3012.2	2959.2	2986.4	3044.5	3061	3164.1
A0A0B4KFQ5	Tetraspanin 86D, isoform C OS=Drosophila melanogaster OX=7227 GN=Tsp86D PE=3 SV=1	2.137	0.787	2.717	0.836	1.787	0.658	3.88064e-06	0.0661219	1.4125e-07	0.0403728	0.000419781	0.000299905	397.3	849.2	312.6	475.2	10.11	9.5	7.19	23.25	1	1	1	1	2	36.2	6.51	0.005	2.541	429.1	421.5	345.4	374.5	860	849.2	781.4	770.2	971.4	271.7	309.1	316.1	318.8	709.3	478.9	447.2	471.6	393.7	399.4
Q9VR89	RNA-binding protein pno1 OS=Drosophila melanogaster OX=7227 GN=l(1)G0004 PE=2 SV=1	0.758	0.838	0.905	0.97	0.736	0.813	3.89639e-06	0.00034013	0.0660719	0.83697	1.3272e-06	9.0453e-05	1970.5	1494.6	1651.4	2030.7	5.23	3.3	6.06	2.73	1	9	21	9	41	26.7	9.95	0	53.427	2088	2051.9	1892.3	1892.1	1472.1	1581	1494.6	1567.1	1485.6	1765	1705	1543.3	1599.6	2062	2094.2	1999.9	1973.3	1915.5	1944.2
A1ZB68	FI01423p OS=Drosophila melanogaster OX=7227 GN=GstE3 PE=1 SV=1	1.619	2.336	0.693	0.568	0.92	1.327	3.95089e-06	2.36523e-09	6.03755e-06	2.27336e-07	0.0378001	0.000964133	134.9	218.4	315.1	237.4	7.88	8.23	3.68	7.86	1	8	12	8	35	24.9	7.59	0	25.844	122.2	139.9	146.2	130	197.2	221.2	182.4	218.9	218.4	307.1	301.8	323.3	324.8	234.6	267.9	240.2	223.1	112.1	132.6
Q8IRG6	FACT complex subunit spt16 OS=Drosophila melanogaster OX=7227 GN=dre4 PE=1 SV=2	1.239	1.031	1.202	1.07	1.326	1.103	3.95463e-06	0.358041	4.66199e-05	0.085862	1.68502e-07	0.00392724	8322	10314.9	8578.9	7778.9	2.44	4.72	2.44	3	1	48	123	48	45	123.5	6.29	0	241.658	8404.1	8240.9	8404	7977	10207.3	10432.4	10314.9	9321.5	10501.6	8555.1	8392	8895.4	8602.8	7973.4	7429	7719.4	7838.8	7709.6	7808.3
O02002	Caspase-1 OS=Drosophila melanogaster OX=7227 GN=Dcp-1 PE=1 SV=1	0.859	0.893	0.962	1.009	0.867	0.901	3.97876e-06	0.000425542	0.0528122	0.949007	8.27642e-06	0.00105078	816.2	701.3	728.9	808.8	1.27	2.98	4.2	1.85	1	9	16	9	33	35.9	7.74	0	44.286	814.4	818.1	810.5	834.1	702.1	663.2	701.3	683.2	716.8	708.1	705.5	767.1	750.4	828.1	799.7	796.6	818	747.1	775.2
Q9VSA3	Medium-chain specific acyl-CoA dehydrogenase, mitochondrial OS=Drosophila melanogaster OX=7227 GN=Mcad PE=1 SV=1	1.29	1.057	1.22	0.858	1.107	0.907	4.04851e-06	0.422981	3.91512e-05	0.000726498	0.0295735	0.011998	10174.5	13122.6	10753.1	11856.8	5.56	3.93	3.63	3.07	1	23	97	23	53	45.8	7.94	0	137.677	9578.1	9778.7	10700.4	10586.4	12752.3	13163.7	13122.6	12257.7	13624.4	10708.1	10079.4	10959.9	10798.3	12016.4	11699.3	11453.2	12286.4	8786.5	9265.4
Q9VT04	Proton-coupled amino acid transporter-like protein pathetic OS=Drosophila melanogaster OX=7227 GN=path PE=1 SV=1	0.845	1.155	0.732	0.922	0.779	1.064	4.07731e-06	6.56826e-05	3.35447e-09	0.00873412	4.64097e-08	0.0527142	2527.8	2135.7	2919	2743.1	3.78	1.86	2.8	3	1	9	39	9	24	52	7.71	0	74.278	2445.3	2648.4	2470.6	2586.3	2175.3	2131.8	2135.7	2179.6	2081.6	2999.4	2813	2885	2953.4	2663.9	2799	2688.3	2832.6	2243.2	2509.4
Q95TS8	Daedalus, isoform A OS=Drosophila melanogaster OX=7227 GN=daed PE=2 SV=1	0.857	1.041	0.824	0.977	0.838	1.017	4.15485e-06	0.154634	2.5797e-07	0.651216	9.25021e-07	0.69641	2383.9	2044.1	2481.3	2439.9	1.06	3.86	0.13	2.5	1	8	18	8	27	32	8.4	0	47.149	2396.6	2371.2	2354.7	2410.8	2173.2	2095.2	1969	2044.1	2008.6	2483.1	2477	2484	2479.5	2501.6	2437.7	2442.2	2353.7	2198.6	2246.7
Q9VEZ3	Protein mini spindles OS=Drosophila melanogaster OX=7227 GN=msps PE=1 SV=3	1.347	1.125	1.198	0.965	1.3	1.085	4.17492e-06	0.0347318	0.000534926	0.646433	2.23116e-05	0.254448	23350.5	31462.4	26258.5	24195.9	4.35	6.17	2.43	5.47	1	90	246	90	46	225.8	8.06	0	514.152	22261.2	23116.4	24703.6	23587	30809	31462.4	32966	28492.5	33345.1	26656.2	25356.9	26647.3	25875.5	25005.3	23412.7	23237.1	26034.6	20421.5	21903.1
Q9VBX4	LD36051p OS=Drosophila melanogaster OX=7227 GN=CG10057 PE=1 SV=2	0.796	1.005	0.791	0.928	0.739	0.933	4.18677e-06	0.986212	2.68045e-06	0.0145653	6.26959e-08	0.0269409	3647.3	2902.1	3666.7	3929.1	1.95	4.86	2.86	1.24	1	41	63	41	39	129.2	9.57	0	164.09	3633.5	3661.2	3514	3663.5	3139.3	2902.1	2877.2	3171	2892.5	3622.9	3742.5	3509.4	3711	3877.1	3964.1	3973.4	3894.4	3333.2	3469
Q9VKX7	Probable dolichyl pyrophosphate Man9GlcNAc2 alpha-1,3-glucosyltransferase OS=Drosophila melanogaster OX=7227 GN=gny PE=2 SV=2	1.364	1.545	0.883	0.656	0.895	1.013	4.18934e-06	4.43041e-07	0.110291	9.13557e-07	0.316217	0.915624	102.7	140	158.6	156.6	6.94	6.31	5.88	2.73	1	2	3	2	3	53.6	8.6	0	5.587	97.7	102.2	103.2	114.7	151.4	159.4	140	139.9	138.5	153.9	172	151.5	163.5	160.5	150.3	155.9	157.2	89.6	96.8
Q7KT16	FI17352p1 OS=Drosophila melanogaster OX=7227 GN=vari PE=1 SV=2	1.234	1	1.235	1.112	1.372	1.112	4.19322e-06	0.999556	4.83469e-06	0.00481951	3.43108e-08	0.0039848	1958	2416.2	1957	1760.5	3.92	3.6	4.03	2.78	1	13	19	13	19	72.3	7.31	0	42.17	1920.3	1996.3	2054.2	1882.3	2532	2304.5	2401.6	2416.2	2488.2	1887.7	1932	2072.5	1982.3	1814.8	1729.7	1712.4	1791.9	1761.6	1891.6
Q9VGH9	SET domain binding factor, isoform A OS=Drosophila melanogaster OX=7227 GN=Sbf PE=1 SV=3	1.077	1.016	1.06	0.987	1.063	1.003	4.27901e-06	0.55529	2.8973e-05	0.396951	4.51393e-05	0.991171	1098	1182.1	1115.5	1112.3	1.85	1.15	1.33	0.6	1	21	28	21	14	224.9	7.11	0	69.618	1093.6	1068.4	1102.3	1116.6	1198	1193.8	1166.1	1172.3	1182.1	1117.3	1086.7	1114.5	1116.5	1104.3	1107.7	1116.9	1117.8	1003.2	1012.3
Q9VF20	ATP-binding cassette sub-family B member 6 OS=Drosophila melanogaster OX=7227 GN=Hmt-1 PE=1 SV=1	1.211	1.172	1.034	0.957	1.159	1.121	4.29321e-06	0.000103211	0.270372	0.237233	8.14208e-05	0.00291066	2171.1	2630	2543.7	2268.8	2.36	4.53	2.16	3.04	1	24	53	24	32	97.8	8.37	0	136.017	2116.4	2155.2	2237.5	2187.1	2582.5	2693.3	2630	2484.4	2803	2550.2	2449.9	2537.2	2575.7	2202.9	2275.3	2262.3	2370.3	1941.5	2042
Q9VF80	Cysteine protease OS=Drosophila melanogaster OX=7227 GN=Atg4b PE=2 SV=2	0.806	0.867	0.929	1.067	0.86	0.926	4.32743e-06	0.00151302	0.0143438	0.111511	0.000178604	0.126019	529.9	426.9	459.6	496.5	1.81	4.13	1.07	6.65	1	6	6	6	10	74.7	5.96	0	17.914	538.5	517.5	524.9	535	427	426.9	396.1	431.1	398.2	456.5	463.8	462.7	453.7	493.9	499.2	529.5	449.9	494	490.3
A8DYK5	Uncharacterized protein, isoform B OS=Drosophila melanogaster OX=7227 GN=Isha PE=1 SV=1	0.885	0.955	0.927	0.998	0.884	0.954	4.36661e-06	0.0182645	0.00106948	0.997678	5.60416e-06	0.0255418	2415.8	2138.8	2307.9	2420.3	0.99	2.82	1.87	1.95	1	20	37	20	17	140.7	7.44	0	106.318	2417.8	2446.6	2413.8	2388	2124.2	2138.8	2045.7	2210	2163.6	2309.7	2306.2	2232	2330.3	2455.2	2411.2	2429.5	2345	2218	2318.2
Q9V3D4	Chitinase-like protein Idgf2 OS=Drosophila melanogaster OX=7227 GN=Idgf2 PE=1 SV=1	1.525	0.962	1.585	0.71	1.083	0.683	4.46987e-06	0.89179	1.76852e-06	0.000100148	0.291334	3.46874e-05	1891	2884.3	1819.3	2664	4.35	8.91	7.91	5.95	1	16	29	16	50	49.1	6.55	0	90.71	1869	1913.3	1833.5	2024.7	2709.2	3095.5	3238.6	2618.2	2884.3	1708.1	1757.1	1883.6	2035	2456.2	2841.9	2679	2649.1	1714.5	1812.8
M9PDR0	Thioester-containing protein 4, isoform C OS=Drosophila melanogaster OX=7227 GN=Tep4 PE=1 SV=1	1.68	1.017	1.652	1.301	2.185	1.323	4.48957e-06	0.995437	6.14988e-06	0.019766	7.83895e-08	0.0129586	2097.9	3525.3	2134.3	1613.1	5.3	14.21	1.83	13.83	1	35	60	35	28	168.7	5.67	0	137.586	1969.1	2063.1	2133.2	2232.7	3525.3	3483.7	4747.2	3516.4	4090	2130.5	2179.9	2084.6	2138.2	1937.2	1676	1400.4	1552.6	1806.4	1954.8
Q24572	Chromatin assembly factor 1 p55 subunit OS=Drosophila melanogaster OX=7227 GN=Caf1-55 PE=1 SV=1	1.153	1.105	1.043	1.013	1.168	1.12	4.50438e-06	0.000481745	0.0545939	0.911075	1.90203e-06	0.000165557	3891	4487	4300.1	3840.4	1.48	2.99	3.29	1.36	1	12	42	12	31	48.6	4.89	0	74.115	3790.9	3884.5	3922.4	3897.4	4487	4453.4	4566	4285.6	4642.1	4411.2	4087.1	4346.2	4254.5	3820.8	3875.8	3759	3860.1	3477.6	3680.6
Q7K3M5	ATP-dependent RNA helicase DHX15 homolog OS=Drosophila melanogaster OX=7227 GN=Dhx15 PE=2 SV=1	1.086	1.186	0.915	0.884	0.96	1.049	4.5924e-06	1.06273e-09	1.15077e-06	6.26662e-08	0.0026082	0.00119598	4998.9	5428.5	5931.1	5652.4	1.36	1.69	1.27	1.03	1	27	87	26	40	82.6	7.06	0	207.69	5072	5013.6	4908.1	4984.3	5555.4	5428.5	5312.9	5358.2	5429	6027.4	5855.6	5897.4	5965	5720.7	5641.6	5580.5	5663.2	4652.9	4750.5
Q32KD4	Argonaute-1, isoform A OS=Drosophila melanogaster OX=7227 GN=AGO1 PE=1 SV=1	0.857	0.92	0.931	1.057	0.905	0.973	4.5991e-06	0.00378975	0.00578133	0.093386	0.000229858	0.326397	3044.1	2607.4	2802	2880.4	3.82	2.91	2.27	1.97	1	24	50	24	28	109.8	9.07	0	118.574	3125.4	3172.2	2936.7	2964.9	2581.6	2607.4	2452.2	2641.1	2621.8	2763.3	2847.9	2716.5	2841.2	2971.1	2858.8	2902.2	2844.1	2867.1	3005.7
Q9VN27	Putative lipoyltransferase 2, mitochondrial OS=Drosophila melanogaster OX=7227 GN=Lipt2 PE=2 SV=1	1.318	1.045	1.261	0.868	1.143	0.907	4.72777e-06	0.645287	2.56906e-05	0.0101263	0.0021588	0.0858274	514.4	677.9	537.5	592.9	3.2	6.32	2.66	6.62	1	7	8	7	31	26	8.28	0	24.437	521.8	533.4	507.2	495.8	678.5	664.4	677.9	670	769.6	521	528.8	551.1	546.4	634.5	604.6	581.4	541.9	478.6	505.4
O61444	mitogen-activated protein kinase kinase OS=Drosophila melanogaster OX=7227 GN=Mkk4 PE=1 SV=1	1.186	1.086	1.093	0.924	1.097	1.004	4.78074e-06	0.00615689	0.00366234	0.00595924	0.00378914	0.999998	969.2	1149.8	1052.2	1048.4	2.05	3.46	1.78	2.84	1	8	17	8	22	47.5	7.43	0	45.728	950.6	953	986.6	985.7	1099.6	1152	1149.8	1087.8	1181.4	1064.5	1052.7	1020.9	1051.7	1044.9	1051.8	1011.3	1083.9	872	902.9
Q7K3L1	Guanylate kinase-associated protein mars OS=Drosophila melanogaster OX=7227 GN=mars PE=1 SV=1	1.204	1.129	1.066	1.114	1.341	1.258	4.79519e-06	0.000283672	0.107051	0.0226786	8.90939e-08	2.38043e-06	1998.3	2405.2	2255.8	1793.3	3.84	3.3	2.76	3.5	1	21	34	21	23	101.9	9.98	0	71.448	1854.2	2011.6	1985.2	2012	2450.2	2455.3	2402.5	2260.4	2405.2	2339.3	2229.8	2282.1	2196.9	1772.5	1814.3	1762.4	1901.9	1701	1906
Q9VAH3	Short-chain dehydrogenase/reductase OS=Drosophila melanogaster OX=7227 GN=sro PE=2 SV=1	0.591	0.209	2.822	1.782	1.052	0.373	4.82106e-06	7.96252e-12	4.21682e-10	8.91961e-07	0.262266	2.69034e-09	1517.3	896.3	317.5	851.7	4.8	11.22	5.27	8.8	1	6	11	6	16	38	8.51	0	30.251	1512.4	1566.7	1397.6	1522.2	886.4	983.6	896.3	1075.3	801.8	309.6	325.7	302.5	340.1	732.6	891.9	882.2	822.2	1387.5	1484.4
Q9VM14	dihydrolipoyllysine-residue acetyltransferase OS=Drosophila melanogaster OX=7227 GN=muc PE=1 SV=1	0.852	1.102	0.774	1.07	0.912	1.179	4.82285e-06	0.00160279	2.09181e-08	0.038243	0.000588129	1.30563e-05	9411.5	8021.6	10367.5	8796.4	2.45	1.78	0.64	4.8	1	21	86	21	38	54.2	9.57	0	138.088	9454.1	9743	9369.2	9187.5	7905.8	8148.8	8021.6	7880	8202	10399.7	10309	10335.3	10458	8523.9	9439.6	9015.9	8582.3	8672.8	9231.6
P81900	cAMP-dependent protein kinase type II regulatory subunit OS=Drosophila melanogaster OX=7227 GN=Pka-R2 PE=1 SV=2	1.206	1.091	1.105	1.033	1.246	1.128	4.83152e-06	0.0199105	0.00112468	0.196759	3.47056e-07	0.000463479	3059.7	3689	3338.8	2960.8	2.17	3.48	2.46	2.91	1	19	62	19	55	42.7	4.97	0	119.512	3060.9	3058.4	3191.3	3052.3	3689	3435.5	3714.1	3685.1	3759.2	3198.4	3337.3	3386.9	3340.4	2947.7	3064.1	2974.1	2855	2808	2897.8
Q9VTZ5	Transferrin 2 OS=Drosophila melanogaster OX=7227 GN=Tsf2 PE=1 SV=1	1.165	0.995	1.17	1.076	1.253	1.071	4.84159e-06	0.999698	5.49322e-06	0.0126354	6.46321e-08	0.0106644	4247.9	4947.6	4227	3948.2	2.06	2.41	1.87	4.03	1	30	52	30	32	92.3	6.46	0	147.653	4266.7	4298	4229.1	4100.3	4947.6	4887.5	5121.2	4797.7	4969.4	4291	4164	4307.5	4161.1	4065.4	3834.4	3768.6	4079.2	3914.1	4072.4
Q9VKN7	Aurora kinase B OS=Drosophila melanogaster OX=7227 GN=aurB PE=1 SV=1	1.172	1.05	1.116	1.008	1.181	1.058	4.87321e-06	0.0764677	0.000301363	0.999837	5.4008e-06	0.0871483	1523.4	1784.9	1599.4	1511.5	2.97	1.9	2.47	4.08	1	11	15	11	36	38.3	8.78	0	57.984	1538	1455.7	1508.9	1559.7	1802.4	1846.8	1759.5	1784.9	1771.1	1651.4	1599.3	1554.8	1599.5	1536.5	1486.9	1454	1596.1	1410.9	1379.3
Q9VWY7	Multivesicular body subunit 12A OS=Drosophila melanogaster OX=7227 GN=Mvb12 PE=1 SV=2	0.837	0.897	0.933	0.945	0.792	0.848	4.8747e-06	0.002308	0.0107045	0.085036	1.98266e-07	3.30094e-05	926.9	776.1	831.5	980.4	2.52	2.44	4.23	1.98	1	9	13	9	31	38.3	8.21	0	36.213	942.9	939.8	893.6	914.2	776.1	768.2	768.7	814.1	776.7	885.9	811.2	812.8	850.6	980.9	944.6	987.3	979.8	865	890.4
Q7KVQ8	Uncharacterized protein, isoform B OS=Drosophila melanogaster OX=7227 GN=Dmel\CG1628 PE=3 SV=1	0.735	0.903	0.814	1.167	0.858	1.054	4.93787e-06	0.0463707	0.000501719	0.00598999	0.00394304	0.681233	629.2	462.4	568.1	539	6.56	5.88	0.78	5.26	1	4	5	4	8	50.1	5.31	0	17.395	680.7	652	607.2	589.9	445.9	465.8	456.3	517	462.4	560.6	569.3	566.8	570.6	584.1	544.8	516.7	533.3	624.4	617.7
A0A126GUV0	Uncharacterized protein, isoform C OS=Drosophila melanogaster OX=7227 GN=Jhbp5 PE=1 SV=1	0.677	1.212	0.559	1.049	0.711	1.272	4.95123e-06	0.0101081	5.80823e-08	0.767766	1.96013e-05	0.00176457	7208.2	4881.7	8737.7	6869.5	2.62	10.98	5.48	2.91	1	15	65	15	63	30	7.21	0	113.729	7032	7476	7269	7147.8	5125.7	4636.7	4881.7	5428	4032.3	9204.7	8330.2	9139.5	8353.6	6906.7	6832.5	7149.7	6667.8	6450.8	7083.6
Q9VRI0	RNA helicase OS=Drosophila melanogaster OX=7227 GN=Ddx56 PE=1 SV=2	0.815	0.962	0.847	0.971	0.791	0.934	4.96754e-06	0.236125	9.74111e-05	0.787922	1.47058e-06	0.0498391	2493	2032.9	2399	2568.6	3.83	5.05	1.74	1.41	1	22	47	22	46	62.8	9.19	0	138.789	2657.8	2516.5	2439.3	2469.7	2056.3	1970.6	2018	2241.6	2032.9	2375.5	2422.7	2354.5	2445	2568.3	2629.4	2568.8	2544.3	2438.1	2384.4
P41126	Large ribosomal subunit protein eL13 OS=Drosophila melanogaster OX=7227 GN=RpL13 PE=1 SV=1	0.891	0.916	0.972	1.033	0.92	0.947	5.01255e-06	0.000171563	0.193764	0.0588898	0.000404254	0.0242407	11270.4	10037.7	10328.2	10909.7	1.92	2.56	0.98	2.16	1	12	98	12	44	24.9	10.99	0	72.389	11568.9	11408.1	11127.5	11134.3	10037.7	10319.6	9718.4	10278.9	9879.9	10253	10391.9	10264.8	10460.9	10828.2	11064.5	10991.9	10535.3	10612.8	10809.3
Q8IQW5	RE23625p OS=Drosophila melanogaster OX=7227 GN=HspB8 PE=1 SV=1	1.573	1.276	1.233	0.963	1.515	1.229	5.09162e-06	0.00336887	0.00756923	0.948681	1.07363e-05	0.00888479	1003	1578	1279.7	1041.5	6.34	7.41	7.53	7.65	1	11	29	11	59	21.8	6.57	0	72.29	916.4	969.2	1037.9	1051.7	1578	1349.9	1496.8	1596.5	1635.9	1123.1	1255.4	1304.4	1338.7	1046.9	1036.1	1096.6	912.6	840.7	918.3
Q9VL73	LP20791p OS=Drosophila melanogaster OX=7227 GN=Dmel\CG13124 PE=1 SV=3	0.604	1.393	0.433	0.856	0.517	1.193	5.12317e-06	0.00011715	5.26432e-09	0.0738245	1.88785e-07	0.0122917	301.7	182.2	420.3	352.4	11.05	8.16	6.64	6.28	1	3	3	3	8	55.8	9.57	0	6.991	260.3	328.5	281.5	323.3	198.5	172.6	182.2	201.6	168	416.8	423.9	475.8	415.6	320.4	342.7	369.1	362.3	238.8	311.3
Q9VCA8	Ankyrin repeat and KH domain-containing protein mask OS=Drosophila melanogaster OX=7227 GN=mask PE=1 SV=2	0.958	1.039	0.922	0.979	0.938	1.017	5.16829e-06	2.33696e-05	2.21516e-09	0.00690814	4.86219e-08	0.0185152	18839.3	18046.4	19575.3	19245.3	0.12	0.68	0.75	1.05	1	100	231	100	34	422.9	5.68	0	654.55	18844.8	18833.8	18832.8	18879.1	18046.4	18005.1	17922.1	18196.8	18200.1	19778	19586.7	19420.9	19563.8	19465.6	19007.8	19336.8	19154.2	17287.4	17845.2
P41093	Large ribosomal subunit protein eL20 OS=Drosophila melanogaster OX=7227 GN=RpL18A PE=1 SV=1	0.859	0.958	0.897	1.032	0.887	0.989	5.20378e-06	0.195819	0.000125863	0.566326	3.50791e-05	0.850915	11579.5	9945.3	11090.6	11215.5	2.72	3.04	0.89	1.28	1	13	97	13	54	21	10.62	0	59.588	11665.6	11660.4	11004.5	11499.2	9907.3	9945.3	9999.2	10601	9853.8	11036.3	11160.8	10952.3	11145.1	11068.9	11310.5	11366.1	11121.2	10701.5	11048.3
Q867Z4	Longitudinals lacking protein, isoforms F/I/K/T OS=Drosophila melanogaster OX=7227 GN=lola PE=1 SV=1	1.266	0.939	1.348	1.087	1.376	1.021	5.20717e-06	0.246524	4.38219e-07	0.0759087	1.94622e-07	0.885974	1556.8	1970.6	1461.6	1432.1	1.2	7.09	2.28	1.66	1	12	24	11	13	105.7	6.15	0	77.197	1554.1	1567.1	1559.5	1524.6	1941.5	1970.6	2021.4	1792.4	2181.4	1455	1424.5	1505	1468.2	1448.9	1407.9	1415.4	1455.5	1425.7	1484.8
Q9Y140	Dehydrogenase/reductase SDR family protein 7-like OS=Drosophila melanogaster OX=7227 GN=CG7601 PE=2 SV=1	1.32	1.049	1.258	1.167	1.54	1.224	5.21366e-06	0.900085	1.36816e-05	0.000526022	1.20586e-08	0.000171609	1177.8	1554.2	1235.5	1009.4	8.62	2.67	2.49	0.66	1	6	9	6	24	35.7	9.26	0	21.185	1193.7	1162.1	1350.1	1108.7	1554.2	1597.4	1554.1	1489.6	1584.2	1221.1	1250.1	1186.3	1251	1008	1010.8	999.9	1015.8	1095	1101.1
Q6NN55	Lysophospholipid acyltransferase 6 OS=Drosophila melanogaster OX=7227 GN=oys PE=1 SV=1	0.706	0.916	0.77	0.985	0.695	0.902	5.29046e-06	0.188756	0.000133483	0.999816	4.75442e-06	0.166693	1683.8	1188	1542.8	1709.7	3.89	9.16	4.54	3.73	1	13	21	13	23	81.2	8.29	0	55.416	1675.4	1775.9	1616.9	1692.2	1216.7	1155.1	1188	1351.5	1049.6	1621.9	1521.7	1455.8	1564.1	1613.8	1678.4	1741.6	1749.5	1537	1682.7
Q9W111	Epidermal growth factor receptor pathway substrate clone 15, isoform A OS=Drosophila melanogaster OX=7227 GN=Eps-15 PE=1 SV=2	1.108	1.035	1.071	0.954	1.057	0.987	5.44574e-06	0.103823	0.000255503	0.00391088	0.00709403	0.306847	6169.3	6836.1	6383.6	6467.8	2.24	0.77	1.04	2.68	1	44	92	44	43	134.3	5.21	0	234.176	6085	6254.7	6040.4	6333.5	6821.1	6784.7	6912.1	6894.6	6836.1	6447.9	6296.2	6356.6	6410.8	6402.6	6405.8	6530.3	6775.6	5582.1	5926.4
D1YSG0	Bent, isoform F OS=Drosophila melanogaster OX=7227 GN=bt PE=1 SV=1	1.472	0.898	1.639	0.955	1.406	0.857	5.45359e-06	0.213084	4.07575e-07	0.381471	6.27486e-05	0.0117589	18255.7	26873.5	16392.8	19118.2	2.37	9.16	2.67	10.2	1	227	359	227	29	999.5	6.19	0	972.829	18587.5	18575.6	17941.4	17750.1	28996.2	24578.5	26097.4	26873.5	31001.8	16040.3	16029.2	16830.4	16752.9	22833.3	19478.5	18398.3	18764.5	17051.4	17600.6
Q9VVG0	Cadherin 74A, isoform A OS=Drosophila melanogaster OX=7227 GN=Cad74A PE=2 SV=1	0.729	0.75	0.972	1.18	0.86	0.885	5.48891e-06	2.72445e-05	0.863888	0.00264074	0.0109403	0.058992	4715.9	3436.9	3535.1	3996.2	4.83	7.78	1.88	3.98	1	50	81	50	31	200.9	4.96	0	242.012	4739.6	4980.8	4425.8	4692.4	3688.1	3436.9	3378.1	3707.9	3049.7	3568	3475.9	3502.6	3624.2	3735.8	3939	4082	4054.2	4347.9	4719.4
P16378	G protein alpha o subunit OS=Drosophila melanogaster OX=7227 GN=Galphao PE=1 SV=1	1.358	0.976	1.391	0.985	1.338	0.961	5.50883e-06	0.613767	1.10367e-06	0.999999	5.61012e-06	0.605939	695.4	944.4	678.8	706	4.29	7.54	3.24	3	1	9	17	7	28	40.5	5.53	0	48.562	703	751.7	687.3	687.8	944.4	878.5	959.4	892.3	1059	650.6	690.8	698.3	666.9	734.9	708.3	683.2	703.7	644.9	712.2
P91891	Protein Mo25 OS=Drosophila melanogaster OX=7227 GN=Mo25 PE=2 SV=2	0.845	0.909	0.929	1.018	0.86	0.926	5.50921e-06	0.00312176	0.00917981	0.999932	5.95283e-06	0.0034541	3732.2	3152.9	3393.8	3665.8	2.92	3.19	1.22	2.6	1	16	41	16	44	39.4	7.25	0	89.387	3777.8	3782.3	3551.4	3687.1	3152.9	3164.4	3119.7	3358.5	3111.5	3461.4	3368.8	3379.5	3408.2	3690.7	3832.1	3641.2	3618	3465.6	3583.7
Q9VA94	GH07782p OS=Drosophila melanogaster OX=7227 GN=Dmel\CG9747 PE=2 SV=1	0.592	0.675	0.877	1.074	0.636	0.725	5.53113e-06	0.00018655	0.200056	0.81741	1.91866e-05	0.000789581	1465.8	868.4	990	1364.7	7.44	12.42	4.91	8.75	1	11	33	11	30	52.6	8	0	77.215	1476	1455.6	1308.3	1569.6	913.7	776.8	868.4	1007.9	741.4	994.7	1016.7	906.8	985.4	1292.1	1441.4	1506.6	1253.5	1354	1379.2
Q95083	Proteasome subunit alpha type-5 OS=Drosophila melanogaster OX=7227 GN=Prosalpha5 PE=2 SV=2	1.149	1.193	0.963	0.975	1.12	1.163	5.69658e-06	6.69819e-07	0.142219	0.626075	3.32173e-05	2.83485e-06	5045.7	5796.9	6021	5175.8	3.49	2.35	1.07	2.45	1	10	49	10	43	26.9	4.98	0	97.493	4862.6	4911.3	5195.4	5183.8	5783.6	5796.9	5936.5	5603.4	5933.2	6009.9	6032.2	6132.9	5985.5	4980.4	5235.1	5253.4	5117.1	4460.7	4653.5
P29845	Heat shock 70 kDa protein cognate 5 OS=Drosophila melanogaster OX=7227 GN=Hsc70-5 PE=1 SV=2	0.778	0.884	0.88	0.922	0.717	0.814	5.75565e-06	0.00543017	0.00541228	0.117817	2.80468e-07	8.94092e-05	21179.6	16474.1	18712.5	22974.5	3.87	4.47	0.62	6.5	1	40	219	39	61	74	6.35	0	261.8	21635.5	20733.3	20619.2	22377.2	16227.3	16964.5	16474.1	17616.1	15664.4	18647	18894.3	18655.5	18769.7	21773.6	24241.5	24446.2	21735.3	19847.5	19645
P49415	Syndecan OS=Drosophila melanogaster OX=7227 GN=Sdc PE=2 SV=2	0.734	0.846	0.867	0.939	0.689	0.795	5.86822e-06	0.0013673	0.0246948	0.871385	2.14284e-06	0.000377856	1737.5	1274.7	1470.4	1849.8	5.09	3.79	3.55	7.3	1	7	16	7	22	42.1	4.48	0	45.388	1872.4	1760.1	1662.7	1715.1	1327.6	1274.7	1273.6	1385.5	1274	1507	1511.4	1434.7	1407.7	1902.8	1869.6	1830.2	1611.2	1717.6	1667.7
Q9VEW2	Putative SERF-like protein OS=Drosophila melanogaster OX=7227 GN=CG17931 PE=3 SV=1	0.793	0.828	0.957	1.008	0.799	0.835	5.90304e-06	0.000154888	0.259887	0.97742	1.03216e-05	0.000294076	1900.6	1506.3	1574.1	1885.9	2.93	4.97	2.78	4.07	1	4	11	4	35	6.9	10.39	0	22.034	1899.3	1950.2	1816.5	1901.9	1557.9	1445.6	1445.8	1620.8	1506.3	1576.5	1564.5	1571.8	1659	1885.1	1886.7	1949	1766.5	1742.4	1847.9
Q9VK07	UV radiation resistance-associated gene protein OS=Drosophila melanogaster OX=7227 GN=Uvrag PE=1 SV=1	0.767	0.804	0.954	0.982	0.753	0.79	5.94459e-06	7.32621e-05	0.507996	0.612122	1.17781e-06	1.22668e-05	609.9	468.1	490.6	621.3	5.01	5.1	3.64	2.19	1	5	6	5	8	80.6	8.59	0	11.054	605.8	614.1	556.4	624	473.4	445.1	468.1	509.5	458.9	489	492.2	468.1	511.6	621.4	606.8	621.2	640.1	555.8	581.8
Q7K581	SD01637p OS=Drosophila melanogaster OX=7227 GN=Paip1 PE=1 SV=1	0.871	0.998	0.873	0.919	0.801	0.917	5.97284e-06	0.926268	2.63232e-06	0.00148782	2.33137e-08	0.00441519	5113.2	4455.3	5100.5	5565.1	1.24	3.12	2.55	2.38	1	14	49	14	29	63.2	6.23	0	104.546	5106	4994.4	5120.4	5131.1	4455.3	4520.1	4373.3	4194.7	4528.3	5330.3	5060.2	5141.2	5044.9	5524.1	5373.5	5681.2	5606.4	4684	4732.2
Q8MYW9	O-acyltransferase OS=Drosophila melanogaster OX=7227 GN=ACAT PE=2 SV=1	1.249	1.023	1.221	0.939	1.173	0.961	6.11117e-06	0.848419	1.94101e-05	0.208652	0.000142754	0.593551	590.6	737.7	604	628.7	3.29	3.85	4.67	4.12	1	6	8	6	10	65.8	8.94	0	23.618	592.5	588.6	564.4	611.5	772.4	765.1	737.7	728	702	619.6	571.4	633.1	588.8	650.5	616.3	593.3	641.3	543.5	557.7
P18091	Alpha-actinin, sarcomeric OS=Drosophila melanogaster OX=7227 GN=Actn PE=1 SV=2	1.333	0.807	1.651	1.115	1.486	0.9	6.13296e-06	0.00405916	4.11224e-08	0.0856735	2.39663e-07	0.367428	13139.6	17510	10608.4	11784.7	4.42	4.66	7.68	5.37	1	46	130	46	51	107	5.69	0	299.315	13312.2	13117.1	13162.1	12067.9	18436	17163.1	17510	16818.2	18748.9	10289.7	10742	12137	10476.4	12193.9	12073	11503.3	10828	12212	12428.7
Q9V4D4	Bip2 OS=Drosophila melanogaster OX=7227 GN=Taf3 PE=1 SV=1	0.828	0.895	0.924	0.979	0.81	0.876	6.13487e-06	0.00215004	0.0159949	0.964939	3.26745e-06	0.000952517	1029.6	852.1	921.8	1051.7	2	1.32	4.2	4.68	1	14	19	14	13	154.4	9.23	0	48.088	1046.1	1051	1012.6	1013.4	851.4	866.9	841.1	852.1	867.5	971.8	943.5	887.5	900.5	1088	1031.5	978.8	1072.3	959.6	995.9
Q9VKZ8	Ubiquitin carboxyl-terminal hydrolase OS=Drosophila melanogaster OX=7227 GN=Usp14 PE=1 SV=1	1.106	1.27	0.871	0.996	1.102	1.265	6.16255e-06	8.31856e-10	5.62515e-07	0.605699	3.8243e-05	1.92601e-09	6341.2	7015.2	8051.1	6366.1	2.16	1.73	1.78	2.1	1	20	87	20	45	53.7	6.25	0	157.5	6146.7	6427.1	6259	6424.4	7015.2	6958.1	7135.8	6919.6	7210.7	8266.2	7919.9	8065.4	8036.8	6382.4	6349.8	6337.7	6623.2	5638.7	6089.8
A0A0B4KHK0	Dihydroxyacetone phosphate acyltransferase OS=Drosophila melanogaster OX=7227 GN=Gnpat PE=3 SV=1	0.728	0.977	0.745	0.992	0.722	0.97	6.17174e-06	0.948496	1.31487e-05	0.975151	3.52802e-06	0.77892	1464.8	1065.7	1431.1	1476	3.21	8.94	3.08	3.91	1	12	17	12	16	91.7	7.42	0	44.216	1476	1453.7	1417.2	1529.9	1058.2	1065.7	1075	1181.7	915.8	1496.8	1432.1	1430.1	1389.7	1579.4	1447	1483.1	1468.8	1354	1377.4
B7Z031	Protein peste OS=Drosophila melanogaster OX=7227 GN=pes PE=2 SV=1	0.818	1.119	0.731	0.971	0.794	1.086	6.21251e-06	0.0025151	3.19284e-08	0.676752	1.40575e-06	0.0196007	2142.8	1751.8	2397.2	2207.1	1.47	4.84	2.91	3.12	1	12	29	11	25	62.2	7.24	0	63.843	2114.7	2137.3	2148.2	2189.9	1751.8	1840.6	1714.4	1864.8	1661.1	2488.8	2325.1	2420.9	2373.6	2133.7	2245.2	2284.6	2169.7	1939.9	2025.1
P15330	Embryonic polarity protein dorsal OS=Drosophila melanogaster OX=7227 GN=dl PE=1 SV=2	1.278	1.093	1.169	0.953	1.218	1.042	6.34251e-06	0.0379492	0.000847799	0.480582	5.54203e-05	0.403245	1571.3	2007.5	1718	1648.8	3.48	4.83	2.24	5.86	1	13	26	13	14	111.5	5.38	0	46.407	1477.8	1566.5	1576.1	1602.2	2014.3	1959.6	2007.5	1871.2	2137.2	1738.5	1664.7	1747.5	1697.7	1690.1	1608.6	1504.2	1716.8	1355.7	1484.3
Q9V3K9	Carnitine palmitoyltransferase I OS=Drosophila melanogaster OX=7227 GN=whd PE=1 SV=1	1.342	0.98	1.369	1.007	1.351	0.987	6.37834e-06	0.954308	3.18934e-06	0.976451	1.12789e-05	0.79492	3139.7	4214.4	3077.8	3118.3	4.64	5.43	3.89	6.1	1	14	30	14	20	89.5	8.38	0	84.029	2928.6	3081	3255.3	3199.4	3970.9	4214.4	4428.1	3896.8	4317.5	3175.1	2901	3118.4	3037.7	3185.6	3052.5	2991	3426.3	2686.6	2919.3
Q9W1V7	Zinc finger protein 277 OS=Drosophila melanogaster OX=7227 GN=CG9890 PE=1 SV=1	0.818	0.876	0.933	1.131	0.926	0.992	6.52708e-06	0.00108725	0.03686	0.00309104	0.0117661	0.931911	845.4	691.6	741	747.3	3.82	3.66	3.02	3.98	1	8	11	8	17	53.2	5.85	0	32.525	869.6	812.4	875.3	821.9	696.2	716.2	691.6	647.4	684.3	768.8	739.4	714.1	742.5	793.4	739.4	723.4	755.1	797.7	769.8
Q9VT05	Leucine-rich repeat protein soc-2 homolog OS=Drosophila melanogaster OX=7227 GN=CT11439 PE=1 SV=1	1.198	1.06	1.131	1.013	1.214	1.074	6.5358e-06	0.0428801	0.000780268	0.745539	1.71425e-06	0.00679613	1466.5	1757.3	1554.4	1447.1	1.56	4.13	0.14	2.7	1	11	27	11	32	36.8	9.45	0	67.06	1437	1467.2	1465.8	1493.1	1668.2	1764	1773.6	1613.7	1757.3	1555	1557.7	1552.8	1553.9	1463.3	1431	1385	1470	1318.3	1390.2
Q9V455	Importin subunit alpha OS=Drosophila melanogaster OX=7227 GN=Kap-alpha3 PE=1 SV=1	0.667	0.854	0.781	0.954	0.636	0.815	6.5539e-06	0.0342044	0.000981891	0.889211	2.51355e-06	0.00927874	6783.5	4524.3	5793.8	7113	5.1	8.73	5.63	6.66	1	15	43	15	27	57	5.26	0	84.109	7169.3	6585.1	6422.8	6987.9	4577.7	4524.3	4455.5	5365.9	4350.1	5688.3	6288.4	5526.9	5901.3	6826.7	7411.2	7419.8	6464.7	6576.8	6239.4
Q9VC57	Atlastin OS=Drosophila melanogaster OX=7227 GN=atl PE=1 SV=1	0.915	1.008	0.908	0.987	0.904	0.995	6.60306e-06	0.73803	1.70102e-06	0.720995	1.63704e-06	0.999989	6046.6	5534	6093.7	6123.4	1.39	1.9	2.25	1.19	1	15	46	15	34	60.9	6.54	0	84.517	6166.4	6097.2	5991.8	5996.4	5535.1	5534	5499.7	5582	5313.7	6339.7	6059.4	6128.2	6036.4	6154.9	6082.3	6092.1	6240.4	5656.8	5777.2
Q9VYE3	FI21110p1 OS=Drosophila melanogaster OX=7227 GN=Dmel\CG15747 PE=1 SV=2	1.255	1.02	1.23	1.006	1.263	1.026	6.61082e-06	0.769184	2.67533e-05	0.991802	4.49846e-06	0.607857	180.2	226.2	183.8	179.1	1.49	5.97	2.14	1.2	1	9	13	9	23	44.7	5.74	0	24.915	180.7	179.6	183.9	177.4	226.2	212.2	233.1	203.8	233.5	182	181.8	185.6	190.3	179.2	179	181.7	176.5	165.7	170.2
A1Z713	Intermembrane lipid transfer protein Vps13 OS=Drosophila melanogaster OX=7227 GN=Vps13 PE=1 SV=2	1.118	0.974	1.149	1.026	1.147	0.999	6.76126e-06	0.192545	4.52448e-07	0.364492	7.61061e-07	0.970068	12955	14487.1	12612.8	12625.3	1.38	2.48	0.39	1.86	1	101	182	101	31	374.3	5.85	0	453.243	13068.7	13159.9	12842.3	12784.3	14734.7	13947.7	13975.5	14548.4	14487.1	12580.1	12674.8	12645.6	12573.2	13027.9	12483	12590.6	12660.1	11988.6	12469.1
A8JNJ6	Karst, isoform E OS=Drosophila melanogaster OX=7227 GN=kst PE=1 SV=2	1.149	0.992	1.159	0.964	1.107	0.956	6.82818e-06	0.998563	5.50572e-06	0.255175	0.000130651	0.201563	18172	20880.4	18018.9	18856.6	1.96	2.2	2.65	1.96	1	171	271	169	41	497.2	6.47	0	783.31	18319.5	18756.9	18025.7	17977	19965.1	20899.2	20880.4	21149.7	20572.3	17978	17923.4	18948	18059.9	19150.9	18566.7	18466	19155.5	16805.5	17772.4
P47948	Troponin C, isoform 2 OS=Drosophila melanogaster OX=7227 GN=TpnC47D PE=2 SV=2	3.363	1.136	2.962	0.991	3.334	1.126	6.89175e-06	0.949105	1.47119e-05	0.961067	3.56805e-06	0.741376	380.3	1279.1	431.9	383.7	7.06	26.72	14.15	15.25	1	5	17	3	35	17.9	4.09	0	38.688	372.1	388.7	420.7	357.4	1360.5	1018.8	750.8	1578	1279.1	333.9	420	469.8	444	280.7	385	402.2	382.3	341.3	368.3
Q9VAF5	Cadherin-99C OS=Drosophila melanogaster OX=7227 GN=Cad99C PE=1 SV=2	0.748	1.068	0.7	1.01	0.756	1.079	6.91326e-06	0.232168	5.31427e-07	0.927713	1.64349e-05	0.0864668	2299.6	1720.7	2456.5	2277	3.99	4.07	2.35	7.32	1	29	40	29	20	186.8	4.89	0	103.376	2362.4	2260.4	2160.8	2339.4	1720.7	1742.1	1674.9	1861	1710.4	2468.2	2444.8	2359.2	2490.6	2016.4	2378.2	2343.5	2212.3	2167.1	2141.7
Q9VA69	procollagen-proline 4-dioxygenase OS=Drosophila melanogaster OX=7227 GN=PH4alphaEFB PE=1 SV=2	0.655	0.697	0.941	1.115	0.731	0.777	6.96558e-06	1.60642e-05	0.9971	0.196603	0.000178215	0.000403309	2924.7	1916.1	2037.1	2622.7	5.9	8.92	5.56	4.56	1	14	38	14	29	63.1	5.48	0	78.784	3027.7	2909.8	2634.5	2939.7	1880.8	2086.5	1916.1	2224.3	1780.9	2045	2065	1826.8	2029.3	2561	2685.8	2706.5	2451.6	2777.4	2757.1
Q9VDZ4	28S rRNA (cytosine-C(5))-methyltransferase OS=Drosophila melanogaster OX=7227 GN=Nsun5 PE=2 SV=1	0.865	0.953	0.907	1.026	0.887	0.977	6.98351e-06	0.120093	0.000300174	0.534099	5.3277e-05	0.722956	3557.1	3075.5	3389.2	3467.5	2.28	3.83	1.84	1.75	1	15	31	15	31	49.2	8.78	0	63.344	3591	3666.2	3523.5	3480.5	3075.5	3040.3	2907.9	3237.2	3076.7	3347.9	3492.7	3375.5	3403	3542.4	3505.8	3429.5	3415.3	3294.2	3473.8
Q9V9U3	LD45254p OS=Drosophila melanogaster OX=7227 GN=anon-WO0118547.398 PE=1 SV=1	0.787	1.023	0.769	0.985	0.775	1.008	6.98373e-06	0.960534	3.60233e-06	0.980011	4.13969e-06	0.999574	10836.9	8533.2	11091.2	11003.8	2.18	5.24	4.28	3.23	1	30	141	30	72	51.6	4.56	0	217.625	11155.3	10858.8	10578.2	10815.1	8876.1	8375.9	8206.5	8533.2	9349.2	10368.5	10999.7	11482.1	11183.5	11339.7	10842.6	11167.5	10541.1	10233.4	10288.9
Q9VPP0	Equilibrative nucleoside transporter 1, isoform A OS=Drosophila melanogaster OX=7227 GN=Ent1 PE=2 SV=2	0.714	0.949	0.752	1.002	0.715	0.95	7.00647e-06	0.828799	2.39235e-05	0.992281	4.79806e-06	0.679379	360	257	341.6	359.5	4.75	8.26	2.67	1.88	1	5	10	5	11	53.1	5.5	0	15.84	365.5	366.2	330.2	354.7	257	254	268.7	297.8	239.9	352.9	335.2	348.2	335	359.1	347.8	363.4	359.8	335.3	346.9
O77430	GEO01111p1 OS=Drosophila melanogaster OX=7227 GN=SkpA PE=1 SV=1	0.878	0.984	0.893	0.945	0.83	0.93	7.08456e-06	0.871252	2.10717e-05	0.00584541	5.5796e-08	0.00151075	3468.3	3046.5	3411.5	3669.2	2.1	1.81	0.38	3.71	1	10	29	10	59	18.6	4.65	0	61.207	3482	3454.6	3355.1	3526.4	3046.5	2953.8	3025.5	3061.4	3103.3	3396.2	3428.3	3412.2	3410.7	3877.4	3556.8	3706.2	3632.6	3194.2	3273.3
A0A0B4KEU2	Scribbler, isoform J OS=Drosophila melanogaster OX=7227 GN=sbb PE=1 SV=1	1.112	0.971	1.145	1.044	1.161	1.014	7.09667e-06	0.166579	4.23702e-07	0.0210229	1.14991e-07	0.646173	2147.9	2387.5	2085.4	2057	1.35	2.88	1.13	0.29	1	19	28	19	10	233.1	9.19	0	88.882	2176.7	2169.8	2120.4	2126.1	2338	2387.5	2419.7	2289.2	2464.7	2061	2084.2	2118.4	2086.7	2048.5	2060.3	2053.6	2061.3	1996.8	2055.9
X2JAM4	Supervillin, isoform AE OS=Drosophila melanogaster OX=7227 GN=Svil PE=1 SV=1	1.189	1.072	1.109	0.948	1.127	1.016	7.16457e-06	0.024551	0.00154182	0.0902364	0.000415156	0.882928	1940.9	2307.6	2080.6	2046.9	1.46	2.31	0.86	4.98	1	48	66	48	12	496.5	8.6	0	166.057	1988.9	1925.9	1950	1931.8	2333.3	2307.6	2233.9	2222.3	2326.6	2107.3	2081.4	2079.9	2064	2183.8	1941	2018.1	2076.2	1824.6	1824.8
P30189	DNA topoisomerase 1 OS=Drosophila melanogaster OX=7227 GN=Top1 PE=1 SV=1	0.729	0.848	0.86	1.064	0.776	0.902	7.1909e-06	0.00417359	0.00975187	0.642178	4.12744e-05	0.0365139	8530	6221.2	7231.2	8017.7	4.72	6.19	4.45	5.32	1	40	76	38	37	111.6	9.01	0	181.282	8716.1	8612.2	7830	8448.5	6221.2	6343	5832.9	6836.9	5986.3	7207.6	7441.2	6697.8	7254.9	7663	8381	8431.5	7670.2	7995.8	8160.2
A8JUS8	Uncharacterized protein, isoform B OS=Drosophila melanogaster OX=7227 GN=Dmel\CG13373 PE=4 SV=1	1.28	1.131	1.132	0.99	1.268	1.12	7.30623e-06	0.00393095	0.0106289	0.958607	1.47889e-05	0.00966127	1078.9	1381.1	1220.2	1089.3	2.48	5.34	1.46	4.54	1	4	15	4	18	20.2	8.02	0	30.827	1081.3	1076.5	1062.6	1124.9	1381.1	1345.2	1387.5	1240.6	1433.4	1251.6	1213.2	1214.1	1226.4	1099.8	1057.2	1078.9	1172.5	991.9	1020
Q8IQC6	Small VCP interacting protein, isoform A OS=Drosophila melanogaster OX=7227 GN=Svip PE=4 SV=1	1.364	1.132	1.205	1.213	1.655	1.373	7.3135e-06	0.033503	0.00115749	0.000764436	1.85802e-08	6.66048e-06	1108.1	1511.7	1254.4	913.6	7.59	5.03	4.56	3.8	1	4	12	4	40	9.5	7.09	0	14.858	1040.5	1082.8	1238.2	1134	1511.7	1448.4	1547.6	1440.1	1624.8	1206.2	1264.5	1343	1244.4	897.7	964.1	929.9	886.6	954.5	1026
P41375	Eukaryotic translation initiation factor 2 subunit 2 OS=Drosophila melanogaster OX=7227 GN=eIF2beta PE=1 SV=1	0.92	0.93	0.988	1.015	0.934	0.945	7.36041e-06	6.99347e-05	0.621307	0.521397	5.8549e-05	0.000656722	7792.9	7166.3	7250.8	7675.2	1.71	1.92	1.08	0.5	1	17	65	17	56	35.2	5.77	0	117.744	7938.2	7840.9	7626.3	7745.3	7166.3	7199	7086	7395	7036.5	7366.9	7229.6	7181.7	7272	7711.6	7645	7639	7705.4	7282.2	7429.3
Q27294	RNA-binding protein cabeza OS=Drosophila melanogaster OX=7227 GN=caz PE=2 SV=2	0.748	1.054	0.71	0.991	0.742	1.045	7.43311e-06	0.410551	9.24195e-07	0.991613	5.02856e-06	0.567905	2354.3	1762.2	2482.6	2375.8	4.75	4.99	3.62	6.19	1	11	55	11	41	38.8	9.36	0	101.273	2349.3	2359.4	2164.6	2420.2	1794.7	1661.7	1676.9	1874.3	1762.2	2331.5	2473.9	2537.7	2491.4	2155.9	2432.6	2484.6	2320.4	2155.1	2235.6
Q94887	Neurexin-4 OS=Drosophila melanogaster OX=7227 GN=Nrx-IV PE=1 SV=2	1.134	0.932	1.217	1.132	1.283	1.055	7.44866e-06	0.00059952	1.64462e-08	4.60333e-06	1.1203e-09	0.0259287	4790.6	5432	4465	4233.8	1.32	2.68	1.57	1.82	1	27	46	27	23	145.4	6.43	0	128.212	4889.5	4756.2	4823.8	4757.6	5533.5	5266.9	5183.7	5432	5454.7	4362.1	4486.8	4525.5	4443.3	4359.4	4212.1	4255.6	4183.1	4485.5	4506.6
Q9VPR5	Splicing factor 3b subunit 1, isoform A OS=Drosophila melanogaster OX=7227 GN=Sf3b1 PE=1 SV=2	0.918	0.96	0.956	0.993	0.912	0.954	7.47818e-06	0.00640444	0.00653317	0.947581	3.58586e-06	0.00242683	7554	6937.7	7254.2	7605.2	2.27	1.22	0.77	1.55	1	51	106	51	45	149.5	6.67	0	290.666	7661.1	7780.9	7448.5	7423.2	6881.1	6981.9	7091.7	6894.7	6937.7	7187.2	7282.6	7312.2	7225.8	7762.3	7514.3	7535.2	7675.9	7027.9	7372.5
P55935	Small ribosomal subunit protein uS4 OS=Drosophila melanogaster OX=7227 GN=RpS9 PE=1 SV=2	0.874	0.978	0.894	1.079	0.943	1.055	7.53165e-06	0.418326	8.11257e-05	0.00184721	0.0251009	0.0326386	14039.2	12270.9	13729.6	13007.8	0.45	2.54	1.92	3.26	1	15	98	15	58	22.6	10.61	0	71.124	14093.7	13940.9	14043	14035.4	12270.9	12041.2	12161.6	12855.7	12348.3	13310.8	13916.8	13660.5	13799.1	12809.6	13209	13441	12486	12929	13209.2
Q9V3F3	Transcription termination factor, mitochondrial OS=Drosophila melanogaster OX=7227 GN=mTTF PE=2 SV=1	0.871	0.927	0.94	0.994	0.866	0.921	7.55968e-06	0.00126624	0.0381243	0.642852	1.56112e-06	0.000174843	2045.9	1782.8	1896	2058.6	1.03	1.72	2	3.7	1	19	26	19	49	48.3	9.58	0	101.89	2066	2044.9	2046.8	2015.2	1813.6	1782.8	1780.8	1773.4	1847.9	1898.7	1832.9	1920.8	1893.4	2081.9	2035.6	2193.2	2024.1	1895.3	1937.6
Q95SH7	GH26007p OS=Drosophila melanogaster OX=7227 GN=Dmel\CG14969 PE=1 SV=1	1.244	1.03	1.207	1.566	1.947	1.613	7.63352e-06	0.745943	3.33925e-05	2.17611e-09	9.68747e-12	1.08735e-09	337.6	419.8	347.7	215.6	3.93	2.92	0.9	5.84	1	2	3	2	8	34.9	6.54	0	11.312	325.6	332.6	356.3	342.6	405	404.8	429.4	419.8	428.9	345.5	349.5	345.9	352	238	217.1	208.8	214.1	298.7	315.1
Q9W068	LP10272p OS=Drosophila melanogaster OX=7227 GN=Tmhs PE=2 SV=1	0.665	0.818	0.813	1.076	0.716	0.88	7.65647e-06	0.0142293	0.0029386	0.357213	0.00010087	0.268239	494.7	329.1	404.6	459.7	5.84	9.44	2.74	8.44	1	5	7	5	26	29.8	7.55	0	29.089	479.4	527.1	463.5	510.5	346.3	329.1	318.8	362.6	281	400.4	402.4	424.9	406.9	406.9	484.1	485	436.6	439.8	499.5
Q7JV69	SD11922p OS=Drosophila melanogaster OX=7227 GN=Spn55B PE=1 SV=1	1.273	0.943	1.35	1.04	1.324	0.981	7.80206e-06	0.210244	5.44971e-07	0.504533	1.19325e-06	0.913192	668	850.1	629.8	642	4.52	4.66	2.63	3.64	1	6	8	6	22	42.1	5.3	0	26.077	638.8	660	676	710.6	850.1	774.2	876.1	843.8	859.8	636.4	653.8	616	623.2	638.8	645.2	618.4	675.1	586	625.4
Q7K2B0	Ribosomal RNA-processing protein 8 OS=Drosophila melanogaster OX=7227 GN=CG7137 PE=1 SV=1	0.716	0.811	0.883	1.1	0.788	0.892	7.8933e-06	0.000431625	0.129177	0.192855	0.000211624	0.01885	1690	1210.4	1370.2	1536.7	2.92	6.38	3.77	8	1	10	17	10	31	40.3	9.57	0	48.282	1751.3	1718.5	1644.8	1662.1	1177.1	1344.9	1162.8	1296.8	1210.4	1363.4	1377	1280.3	1396.1	1726.5	1568.8	1505.2	1434.2	1606.6	1628.3
Q6IHY4	HDC00336 OS=Drosophila melanogaster OX=7227 GN=Dmel\CG34174 PE=2 SV=1	1.51	1.695	0.891	0.748	1.13	1.268	7.99569e-06	1.0211e-06	0.175449	0.000184325	0.306315	0.0101277	105.4	159.1	178.5	140.8	9.43	9.35	6.82	4.3	1	2	2	2	8	24.6	8.15	0	4.583	87.6	103.1	107.6	107.9	166.2	159.1	139.6	178.3	150.2	189.2	169.3	166.3	188.2	139.8	141.7	139.5	152.6	80.3	97.7
P47949	Troponin C, isoform 3 OS=Drosophila melanogaster OX=7227 GN=TpnC73F PE=2 SV=2	1.941	0.575	3.378	1.21	2.348	0.695	8.13008e-06	0.000129656	7.42201e-09	0.222714	5.89778e-07	0.00408298	824.3	1600	473.7	681.4	5.94	18.04	7.98	7.38	1	6	19	4	37	17.7	4.18	0	47.578	853.3	796.6	852.9	753.6	1689.1	1600	1594.5	1181.6	1995.2	427.4	479.9	519.1	467.5	626.9	746.9	667.1	696.1	782.8	754.8
Q8IR45	BLOC-1-related complex subunit 8 homolog OS=Drosophila melanogaster OX=7227 GN=CG32590 PE=2 SV=1	1.305	1.094	1.193	0.985	1.286	1.078	8.17973e-06	0.0739329	0.00060094	1	8.26265e-06	0.0748656	622.3	812.3	680.7	631.5	5.48	4.32	2.16	4.53	1	4	5	4	24	20.9	8.87	0	10.88	601.3	602.5	672.9	642.6	812.3	824.8	800.8	741	823.2	684.8	676.6	669.6	703.8	656.6	612.4	598.8	651.2	551.6	570.9
Q9VJQ7	LD27791p OS=Drosophila melanogaster OX=7227 GN=mol PE=2 SV=2	1.663	1.26	1.32	0.951	1.582	1.199	8.17988e-06	0.010883	0.00423946	0.951101	1.74091e-05	0.0284597	345.8	575	435.6	363.4	7.17	8.82	4.57	12.24	1	6	8	6	12	53.3	9.66	0	24.224	322.7	343.8	383.1	347.7	590.3	563.8	575	490	626.6	435	423	469.9	436.1	392.8	313.8	336.3	406.4	296	325.8
M9PCU5	Lipase 4, isoform C OS=Drosophila melanogaster OX=7227 GN=Lip4 PE=3 SV=1	0.341	1.052	0.324	1.311	0.447	1.379	8.25086e-06	0.844511	2.7246e-06	0.364348	0.000107388	0.104021	71.1	24.2	74.7	54.2	10.04	29.5	8.5	6.59	1	4	5	4	9	51	6.55	0	9.44	71.6	70.5	74.6	58.9	24.2	19.3	35.5	33.9	19.4	85.5	70.2	74.5	75	54.5	53.9	60.9	52.8	65.7	66.8
P19109	ATP-dependent RNA helicase p62 OS=Drosophila melanogaster OX=7227 GN=Rm62 PE=1 SV=3	0.77	1.054	0.73	0.963	0.742	1.015	8.29467e-06	0.265816	6.90801e-07	0.641282	1.69172e-06	0.883436	13030.4	10035.2	13738	13530.4	3.46	4.73	3.41	5.16	1	43	153	39	65	78.5	9.6	0	250.732	13527.1	13013.9	12427.4	13046.9	9961.1	10034.4	10214.5	11127.3	10035.2	13260.3	14377.9	13612.8	13864.4	13032.7	14047	14114.5	12753.9	12409.2	12330.8
Q9V411	Nucleolar GTP-binding protein 1 OS=Drosophila melanogaster OX=7227 GN=Non1 PE=2 SV=1	0.757	0.955	0.793	1.001	0.758	0.956	8.3062e-06	0.836982	2.80098e-05	0.976244	4.73983e-06	0.61271	8581.1	6497.9	8195.1	8574.7	5.16	5.6	4.32	3.75	1	35	87	35	52	75.3	9.54	0	184.104	8856.7	8792.2	7910.1	8375.1	6497.9	6535.3	6171.2	7082.2	6213.9	8017	8681.7	7897.6	8377.1	8334.1	8822.2	8926.8	8307.3	8124.7	8330.7
Q9VL93	GEO07195p1 OS=Drosophila melanogaster OX=7227 GN=Dmel\CG13117 PE=1 SV=1	1.55	1.2	1.292	1.284	1.99	1.54	8.35823e-06	0.0384684	0.00119832	0.00185264	3.32113e-08	1.469e-05	606.7	940.4	727.9	472.6	3.42	8.82	9.43	7.18	1	5	7	5	45	12.1	8.19	0	18.439	606.8	606.7	614.1	568.8	953.3	896.5	940.4	1038.5	814.6	619	724	778.2	731.9	411.7	485.1	473.7	471.5	556.6	574.8
Q04499	Proline dehydrogenase 1, mitochondrial OS=Drosophila melanogaster OX=7227 GN=slgA PE=1 SV=2	0.848	0.876	0.968	0.988	0.838	0.866	8.44948e-06	4.60786e-05	0.839845	0.89872	3.29611e-06	1.71201e-05	6475.6	5491.3	5670.7	6551.2	2.04	4.28	0.73	0.94	1	32	96	32	44	77.1	8.97	0	184.543	6572.8	6553.1	6295.7	6399	5491.3	5742.9	5447.4	5922.5	5334.4	5694.5	5646.9	5616.6	5704.6	6453.8	6593.6	6531.7	6570.7	6029.6	6209.1
Q9Y171	BcDNA.GH02220 OS=Drosophila melanogaster OX=7227 GN=OXA1L PE=2 SV=1	0.871	0.969	0.899	1.042	0.908	1.01	8.65579e-06	0.469713	8.15383e-05	0.0991555	0.000477669	0.7234	2135.7	1861	2070.3	2050.2	0.61	3.06	1.25	2.92	1	10	25	10	23	48.7	9.55	0	60.558	2136.4	2112.5	2134.9	2141.6	1849.8	1884.5	1861	1975	1825.7	2076.6	2064.1	2063.4	2118.5	2106.3	1977.1	2084.3	2016.6	1959.8	2001.6
Q9VIP9	Condensin complex subunit 2 OS=Drosophila melanogaster OX=7227 GN=barr PE=1 SV=1	1.303	1.272	1.024	0.826	1.076	1.051	8.71141e-06	1.84384e-05	0.999099	0.000291949	0.216712	0.304568	1517	1976.1	1929.5	1836.1	1.04	3.83	3.72	7.53	1	21	38	21	36	82.7	5.58	0	109.441	1503.3	1527.7	1535.6	1506.4	1970.7	1980.4	1976.1	1831.3	2031.5	2053.6	1886.4	1937.3	1921.8	1945.9	1709.2	1732.5	1973.1	1379.1	1447.5
Q9VPK7	Putative tRNA pseudouridine synthase Pus10 OS=Drosophila melanogaster OX=7227 GN=Pus10 PE=2 SV=2	0.818	1.049	0.78	0.958	0.784	1.005	8.80444e-06	0.431914	1.12662e-06	0.765487	2.36103e-06	0.934433	613.5	502.2	643.8	640.6	2.66	4.9	2.7	4.17	1	9	11	9	23	56.7	8.35	0	28.08	637.7	609.9	598.8	617.2	502.2	494	458	511	522	652.8	635	622.7	661.1	628.6	652.9	652.8	597.2	585	577.9
Q9VNF3	RE01652p OS=Drosophila melanogaster OX=7227 GN=Dmel\CG12171 PE=1 SV=1	1.138	1.036	1.099	1.123	1.278	1.163	8.84649e-06	0.3321	0.00013049	3.9685e-05	4.02322e-09	3.60482e-06	3421.9	3895.3	3543.6	3047.9	1.27	3.29	1.77	2.39	1	9	33	8	40	26.9	7.5	0	56.634	3416.8	3422.6	3507.7	3421.2	3863.1	4036.4	3895.3	3768.1	4084.1	3566.4	3521	3623.5	3476.4	2964.8	3140.7	3062.4	3033.4	3134.4	3243
O18404	3-hydroxyacyl-CoA dehydrogenase type-2 OS=Drosophila melanogaster OX=7227 GN=scu PE=1 SV=1	1.231	1.068	1.153	0.982	1.209	1.048	8.88751e-06	0.0939128	0.00052217	0.998226	1.12788e-05	0.124658	6768	8334.1	7226.6	6892.6	3.63	4.05	1.94	2.53	1	13	85	13	73	26.9	9.03	0	107.956	6646	6593.6	7130.8	6892.2	7974	8406.7	8394.5	7654.8	8334.1	7274.8	7065.4	7395.1	7178.8	6591.7	6984.3	6863.1	6922.2	6096.8	6247.5
Q9W3H4	LD36273p OS=Drosophila melanogaster OX=7227 GN=sni PE=1 SV=1	1.144	1.037	1.104	1.033	1.182	1.071	8.90005e-06	0.201746	0.000232863	0.239797	6.74647e-07	0.00601043	2872.1	3286	2977.6	2780.8	1.48	3.68	1.2	1.64	1	12	35	12	66	26.5	8.65	0	68.651	2933.4	2857.4	2886.9	2835.1	3186.4	3302.8	3286	3155.2	3462.9	3028	2975.2	2980	2940.9	2834.1	2740.7	2750.4	2811.6	2691	2707.5
Q95RU0	Protein cueball OS=Drosophila melanogaster OX=7227 GN=cue PE=1 SV=1	0.659	1.121	0.588	1.073	0.707	1.203	9.23052e-06	0.186946	5.73797e-07	0.649368	5.34456e-05	0.0242521	3253.8	2143.6	3646.7	3032.4	2.53	12.49	5.86	6.12	1	13	34	13	18	72.6	6.21	0	62.141	3262.8	3340.2	3140.8	3244.8	1917.1	2179.2	2143.6	2442.1	1761.9	3970.3	3690.7	3457.7	3603.2	2883.8	3207.6	3188.7	2869.1	2993.2	3164.9
O97182	Actin-related protein 2/3 complex subunit OS=Drosophila melanogaster OX=7227 GN=Arpc1 PE=1 SV=1	1.108	1.05	1.056	1.013	1.122	1.063	9.31243e-06	0.0214557	0.00250397	0.992839	6.39524e-06	0.013119	2390.6	2648.7	2509.2	2360.4	0.66	1.65	2.55	2.23	1	13	29	13	46	41.6	8.35	0	77.814	2396.1	2406	2385	2369	2721.5	2611.4	2652.5	2648.7	2617.7	2568.2	2416.7	2524.7	2493.9	2343.2	2356.1	2364.6	2459.4	2198.1	2279.7
Q9W4D1	LD41638p OS=Drosophila melanogaster OX=7227 GN=BEST:LD39762 PE=2 SV=1	1.428	1.447	0.987	1.402	2.002	2.028	9.33532e-06	8.52215e-06	0.954266	9.24598e-06	1.84133e-09	2.4069e-09	348.7	498	504.6	248.8	5.56	7.77	2.03	7.17	1	6	9	6	12	71.4	8.22	0	24.196	336.6	375.2	361.2	335.1	498	550.4	509.3	455.5	462.3	515.7	493.7	510.6	498.6	241	256.9	223.7	263.1	308.8	355.5
Q9V3Y2	Anamorsin homolog OS=Drosophila melanogaster OX=7227 GN=CIAPIN1 PE=1 SV=1	1.19	1.057	1.126	0.864	1.028	0.913	9.3598e-06	0.128194	0.000402781	0.000100242	0.581338	0.00566855	1362	1620.2	1439.4	1576.1	4.17	2.77	1.49	1.65	1	8	18	8	40	27.1	5.21	0	39.176	1364.8	1337.6	1359.2	1466.8	1633.4	1528.7	1620.2	1637.5	1603.9	1429.6	1442.7	1436.1	1477.8	1528.9	1573.2	1586.1	1578.9	1252	1267.4
Q0E8S7	Homer, isoform E OS=Drosophila melanogaster OX=7227 GN=homer PE=1 SV=2	1.195	1.07	1.117	1.009	1.205	1.079	9.37709e-06	0.0392431	0.00136358	0.998202	1.19229e-05	0.0530716	852.6	1018.6	912	845.4	1.53	4.14	1.94	4.48	1	10	17	10	20	57.3	8.65	0	51.665	829.7	855.4	858.7	849.8	1037.7	981.2	1080.5	979.7	1018.6	909.7	891	934.2	914.3	902.6	815.8	830.9	860.1	761.2	810.5
Q9VI74	Protein SHQ1 homolog OS=Drosophila melanogaster OX=7227 GN=CG10055 PE=2 SV=1	0.633	0.998	0.634	1.132	0.717	1.131	9.47544e-06	0.999681	1.08357e-05	0.0739498	0.00072369	0.0870976	925.2	585.6	923.8	817.1	4.48	10.54	4.13	7.73	1	10	14	10	21	69.1	4.64	0	48.569	934.4	948.1	855.4	916.2	578.9	625.9	585.6	709.9	541.6	932.1	933.8	853.9	915.6	701.6	820.7	834.4	813.5	857.2	898.3
O77263	tRNA (guanine-N(7)-)-methyltransferase OS=Drosophila melanogaster OX=7227 GN=CG4045 PE=2 SV=1	0.853	1.16	0.735	0.933	0.796	1.083	9.48613e-06	5.02811e-05	4.78763e-09	0.0948041	3.63779e-07	0.00343979	893.1	761.7	1036.1	956.9	4.81	1.97	1.5	2.95	1	7	14	7	29	29.4	7.91	0	38.677	953.1	891.4	847.9	894.7	767	748	743	780.3	761.7	1061.3	1024.8	1038.9	1033.4	906.7	966	966.1	947.9	874.3	844.6
Q9VDS9	Apoptotic signal-regulating kinase 1, isoform C OS=Drosophila melanogaster OX=7227 GN=Ask1 PE=1 SV=3	1.167	1.001	1.165	0.972	1.135	0.974	9.52665e-06	0.929836	2.28239e-05	0.449744	9.65485e-05	0.79118	4387.4	5119.1	4392.8	4511.6	1.25	1.03	2.62	5.49	1	37	58	37	26	155.4	6.81	0	165.285	4287.9	4408.3	4395.9	4378.9	5116.5	5119.1	5117.7	5211.7	5216.7	4590.3	4370	4415.7	4325.2	4819.4	4228.7	4441.3	4583	3933.5	4176.9
Q9VFC0	MAU2 chromatid cohesion factor homolog OS=Drosophila melanogaster OX=7227 GN=Mau2 PE=2 SV=1	1.211	1.128	1.074	0.896	1.085	1.01	9.61018e-06	0.00107333	0.0629046	0.00285307	0.0218597	0.942909	879.9	1065.6	992.6	982.4	1.51	3.65	1.17	5.02	1	8	12	8	12	71.2	8.12	0	33.396	895.4	881.9	877.9	863	1065.6	1026.1	1081.5	1002.5	1094	1000.5	988.8	996.5	974.2	968.9	915.5	1032	996.1	821.4	835.6
Q24208	Eukaryotic translation initiation factor 2 subunit 3 OS=Drosophila melanogaster OX=7227 GN=eIF2gamma PE=2 SV=1	0.935	0.967	0.968	1.014	0.948	0.98	9.62653e-06	0.00507591	0.011811	0.88746	2.75695e-05	0.018851	9479.3	8866.3	9162.7	9352.8	1.16	1.3	1.07	1.03	1	21	85	21	49	51.5	8.73	0	120.311	9539.1	9489.1	9288.6	9469.6	8866.3	9012.5	8698.4	8919	8832.4	9191.4	9134	8986.4	9195.4	9333.9	9324.6	9371.7	9533.1	8750.7	8991.1
Q9W327	Lysine--tRNA ligase OS=Drosophila melanogaster OX=7227 GN=LysRS PE=1 SV=2	1.056	1.076	0.982	1.024	1.081	1.101	9.6356e-06	1.08834e-06	0.153899	0.0528416	2.52769e-07	5.18258e-08	10635.5	11230.7	11441	10390.3	1.26	1.27	0.62	1.07	1	27	105	27	43	68.5	7.08	0	166.009	10446.9	10741.4	10701.9	10569.4	11209.9	11391.2	11097.4	11451.4	11230.7	11572.6	11440.5	11415.9	11441.5	10249.7	10475.4	10464.6	10316.4	9583.6	10177.6
Q9VBK9	Protein FAM98B OS=Drosophila melanogaster OX=7227 GN=Dmel\CG5913 PE=1 SV=1	0.925	1.034	0.895	0.978	0.904	1.011	9.74689e-06	0.0592102	2.73969e-07	0.142359	4.91907e-07	0.954386	2451.4	2268.2	2535	2507.8	1.51	1.95	1.02	1.79	1	15	36	15	34	49.9	9.7	0	76.947	2473	2408.4	2429.9	2488.2	2207.5	2276.2	2268.2	2179.7	2269.2	2559.1	2497.9	2528.1	2542	2579.6	2503.5	2472.6	2512.1	2268.7	2282
Q9V3P6	26S proteasome non-ATPase regulatory subunit 1 OS=Drosophila melanogaster OX=7227 GN=Rpn2 PE=1 SV=1	1.091	1.099	0.993	0.976	1.064	1.072	9.83803e-06	2.26046e-06	0.387437	0.0572072	0.000987391	0.000117268	19010.8	20734.3	20888.3	19481.2	0.79	1.79	1.42	1.4	1	43	225	43	47	113.1	5.19	0	352.729	19035.2	18839	19203.8	18986.4	20249.5	20734.3	20973.8	20106	20757.1	21016	20761.4	21234.5	20553.5	19971.6	19549	19369	19413.7	17462.1	17850.2
Q9VS62	Smallminded, isoform A OS=Drosophila melanogaster OX=7227 GN=smid PE=1 SV=1	0.87	0.931	0.934	1.019	0.886	0.949	9.87316e-06	0.00308739	0.0208267	0.621887	6.20129e-05	0.0286739	9403	8177.8	8756.1	9226.9	1.99	3.21	0.23	2.85	1	41	144	41	46	104.3	5.44	0	270.224	9722	9464.6	9341.9	9305.3	8444.1	8177.8	7985.2	8156.3	8659.5	8739	8775.8	8773.2	8738.9	9611.7	9287.6	9166.5	8983.5	8918.6	8967.8
Q9VR81	N-acetylglucosamine-6-phosphate deacetylase OS=Drosophila melanogaster OX=7227 GN=CG17065 PE=2 SV=1	1.281	0.885	1.446	1.057	1.354	0.936	9.90823e-06	0.00727734	8.04505e-08	0.381198	1.10493e-06	0.140569	754.1	965.7	667.6	713.2	5.18	5.61	2.84	1.56	1	9	15	9	27	45.3	6.48	0	26.441	781.3	784	727.8	706.5	919.2	982.4	965.7	1005.9	872.7	677	679.2	658.4	638.8	710.9	724.5	715.5	697.9	716.8	742.9
Q9VKK1	Enhancer of mRNA-decapping protein 4 homolog OS=Drosophila melanogaster OX=7227 GN=Ge-1 PE=1 SV=2	1.157	1.066	1.086	1.02	1.181	1.087	9.9666e-06	0.033159	0.00175313	0.856751	3.36594e-06	0.0078194	7918	9163.9	8437.9	7762.7	1.56	2.53	1.83	4.18	1	44	83	44	35	149.2	5.9	0	252.52	7907.1	7928.9	8089.5	7789.7	9163.9	9030.4	9325.5	8912.9	9497.1	8236.7	8358.3	8575.7	8518.2	7923.7	7504.2	7605	8224.2	7253.6	7512.7
O44434	QKR58E-3 OS=Drosophila melanogaster OX=7227 GN=qkr58E-3 PE=1 SV=1	0.787	1.054	0.747	0.999	0.787	1.052	1.00012e-05	0.228493	7.16281e-07	0.951971	4.84135e-06	0.463775	237.6	187.1	250.3	237.8	5.86	4.24	1.7	5.2	1	8	15	5	24	36.7	8.95	0	37.869	249.1	232.8	217.3	242.5	173.7	190.7	177.1	187.1	190	251.9	246.6	256.4	248.7	233	242.8	255.1	226.5	228.5	220.6
A1Z6G6	Uncharacterized protein, isoform A OS=Drosophila melanogaster OX=7227 GN=Dmel\CG1344 PE=1 SV=1	0.875	0.858	1.021	0.942	0.825	0.808	1.00303e-05	2.40638e-06	0.407301	0.0147983	1.21773e-07	4.99336e-08	917	802.8	786.5	973	4.15	1.93	1.28	1.1	1	12	21	12	16	77.8	5.5	0	34.862	962	911.3	869.5	922.7	814.1	799.9	802.8	819.8	779.7	789.3	789	768	784.1	972.6	973.4	961.7	987.8	882.5	863.5
Q9VVS6	Ubiquitin-like-conjugating enzyme ATG3 OS=Drosophila melanogaster OX=7227 GN=Atg3 PE=1 SV=1	0.835	0.971	0.86	0.934	0.78	0.907	1.00357e-05	0.312528	0.00016278	0.419797	1.22749e-06	0.0218055	965.5	806.1	937.1	1033.3	3.16	2.67	2.79	4.54	1	7	16	7	28	37	4.74	0	49.669	1022.1	968.5	953.7	962.5	823.4	798.2	806.1	847.7	795.1	909.6	958.6	957.8	916.9	1033.8	1032.8	1045.1	945.9	937.6	917.7
Q9VP47	Pre-rRNA-processing protein TSR1 homolog OS=Drosophila melanogaster OX=7227 GN=Tsr1 PE=1 SV=1	0.805	0.934	0.862	1.048	0.844	0.98	1.02062e-05	0.158091	0.000358349	0.506852	8.83597e-05	0.836117	4963.2	3997.6	4638.1	4734.4	4.49	6.24	2.71	3.15	1	25	53	25	32	93.7	6.87	0	117.922	5169	5026.8	4646.8	4900.3	3495.5	4000.8	3691.7	4037.3	3997.6	4657.8	4634.3	4397.1	4641.8	4668.1	4850	4801.6	4519.9	4741.8	4763
Q9VHB8	2-oxoisovalerate dehydrogenase subunit alpha OS=Drosophila melanogaster OX=7227 GN=BckdhA PE=1 SV=1	0.87	0.821	1.059	1.02	0.887	0.838	1.02407e-05	6.10729e-07	0.0574648	0.572993	7.37588e-05	2.86429e-06	3326.9	2892.9	2731.7	3260.7	3.23	2.79	1.07	2.99	1	15	37	15	43	49.7	6.65	0	95.627	3414.6	3438.5	3241.4	3240.7	2938.8	2892.9	2750.2	2953.3	2871	2705.4	2732.3	2731.1	2775.8	3197.2	3341.6	3325.5	3142.8	3132.4	3258
Q9VSR7	valine--tRNA ligase OS=Drosophila melanogaster OX=7227 GN=ValRS-m PE=2 SV=1	0.869	0.848	1.025	1.192	1.036	1.01	1.02631e-05	3.53513e-06	0.578649	1.8637e-06	0.296374	0.953038	1254.7	1090.3	1063.8	1052.8	4.1	1.96	1.65	2.41	1	17	23	17	19	113	6.7	0	76.747	1264.2	1327.4	1203.1	1245.2	1068.1	1094.6	1077.1	1124.3	1090.3	1059.7	1067.8	1047.1	1089.1	1045.9	1028.7	1059.7	1088.9	1159.8	1257.7
Q9VSL8	Rhea, isoform B OS=Drosophila melanogaster OX=7227 GN=rhea PE=1 SV=1	1.081	0.963	1.123	1.033	1.117	0.995	1.0313e-05	0.00975454	9.78385e-08	0.0498142	2.5695e-07	0.806415	16665.2	18016.1	16043.6	16127	0.65	1.09	1.18	2.47	1	105	253	104	45	306.8	6.21	0	649.201	16682.6	16826.8	16647.7	16565.5	17969.1	17853.4	18016.1	18360.8	18170.9	16211	15932.5	16155.4	15808.4	16650.4	15887.2	15813.9	16370.4	15304	15943.6
Q9VCI4	LD32918p OS=Drosophila melanogaster OX=7227 GN=udt PE=2 SV=2	1.265	1.092	1.159	1.078	1.363	1.177	1.03327e-05	0.0237951	0.00258302	0.0532635	2.68343e-07	0.000154361	623.3	788.4	680.5	578.3	3.17	5.25	4.07	3.31	1	7	13	7	13	71.1	6.7	0	26.808	623.7	623	652.2	604.1	814.5	718.9	788.4	824.3	782.3	672.5	688.6	731.4	671.1	593	575.8	548	580.8	572.1	590.3
Q7KRI2	Longitudinals lacking protein-like OS=Drosophila melanogaster OX=7227 GN=lolal PE=1 SV=1	0.83	0.949	0.875	1.083	0.899	1.028	1.03593e-05	0.165735	0.000346773	0.0533196	0.00113364	0.907722	1999.6	1659.3	1897	1845.8	2.33	2.45	2.82	5.62	1	4	13	4	31	14.5	7.4	0	22.377	1983.8	2015.4	1930	2037	1668	1659.3	1601	1609.5	1696.2	1809.7	1897.5	1935.1	1896.5	1759.8	1920.6	1967.5	1773.9	1819.9	1909.7
Q9VIW3	Ran GTPase-activating protein OS=Drosophila melanogaster OX=7227 GN=RanGAP PE=1 SV=1	1.076	1.157	0.93	0.965	1.038	1.116	1.04819e-05	3.91936e-09	5.7577e-06	0.00455588	0.0148794	1.8319e-07	6717.6	7228.4	7771.6	6962.6	2.5	0.8	0.24	0.87	1	20	82	20	39	66	4.65	0	163.353	6799.3	6636.9	6467.5	6830.6	7188	7228.7	7228.4	7228.7	7095.2	7779.6	7761.1	7801.7	7763.5	6897.9	7004.2	6921.2	7021.4	6237.4	6288.6
Q9V431	Apoptosis inhibitor 5 homolog OS=Drosophila melanogaster OX=7227 GN=cass PE=2 SV=1	0.901	1.084	0.831	1.03	0.928	1.117	1.06196e-05	0.00060328	2.09046e-08	0.108886	0.000559014	1.35667e-05	6804	6129.3	7376.9	6605.7	1.27	2.55	1.9	2.28	1	24	68	24	49	59.9	6.76	0	140.442	6862.9	6800.7	6807.3	6661	6157	5961.5	5819.8	6129.3	6179.9	7169.6	7339.9	7414	7497.7	6619.5	6595.1	6616.4	6313.3	6295.8	6443.7
A8JNS4	Starvin, isoform E OS=Drosophila melanogaster OX=7227 GN=stv PE=1 SV=1	1.32	0.929	1.422	1.16	1.531	1.077	1.06336e-05	0.35908	1.11035e-06	0.00756069	8.65374e-08	0.156659	166.3	219.5	154.4	143.4	3.22	4.51	7.62	4.91	1	4	4	4	7	68.8	6.32	0	9.508	159.5	163.8	171.5	168.8	224.7	219.5	215.5	207.6	234.2	143.3	172	153.8	155.1	144.6	134.8	142.1	151.8	146.3	155.2
Q5BIA9	RE10908p OS=Drosophila melanogaster OX=7227 GN=Dmel\CG8613 PE=1 SV=1	0.853	0.86	0.992	1.116	0.952	0.959	1.06689e-05	2.02026e-05	0.999948	0.000335247	0.237839	0.29636	969.8	827.1	833.7	869	2.13	2.43	3.51	3.15	1	17	25	17	27	92	6.48	0	85.842	995.8	981.3	950.7	958.4	861.3	808.9	824.5	845.7	827.1	823.6	844	869.6	800.7	894.7	830.7	860.8	877.2	913.5	929.8
Q95RQ7	LD15658p OS=Drosophila melanogaster OX=7227 GN=Dmel\CG17490 PE=1 SV=1	0.85	0.904	0.941	1.132	0.963	1.023	1.0673e-05	0.00154538	0.0487759	0.000102533	0.629521	0.388529	331.2	281.6	299.3	292.6	1.68	1.47	0.83	5.47	1	5	6	5	9	81.9	7.94	0	15.682	323.3	331.8	330.5	336.8	282.7	278.9	288.9	281.6	278.7	301.5	295.8	298.4	300.3	299.8	285.5	268.5	303.2	296.6	314.4
P39018	Small ribosomal subunit protein eS19A OS=Drosophila melanogaster OX=7227 GN=RpS19a PE=1 SV=3	0.851	0.908	0.937	1.086	0.924	0.986	1.07257e-05	0.00122962	0.0627522	0.00353071	0.0201682	0.930938	12122.5	10314.8	11011	11165.9	3.11	3.35	2.05	2.49	1	12	96	11	62	17.3	10.11	0	56.572	12527.2	12038.5	12207	11623.5	10314.8	10501	10105.9	10907.7	10048.1	10964.8	11057.4	10621.4	11125.9	11073.9	11282.2	11258.7	10686.7	11491.9	11406.6
P17704	Small ribosomal subunit protein eS17 OS=Drosophila melanogaster OX=7227 GN=RpS17 PE=1 SV=2	0.888	0.933	0.952	1.07	0.951	0.998	1.08072e-05	0.000604319	0.134021	0.00470335	0.0149887	0.653395	7197.9	6394.5	6715.6	6726.2	1.93	1.53	3.04	1.19	1	6	48	6	39	15.3	9.94	0	41.596	7279.4	7117.3	7284.1	6997.6	6512.6	6541.9	6313	6362	6394.5	6776.2	6736	6337.6	6695.3	6690.5	6854	6762.1	6680.3	6677.8	6743.7
Q9W3R8	sn-1-specific diacylglycerol lipase ABHD11 OS=Drosophila melanogaster OX=7227 GN=Dmel\CG2059 PE=1 SV=1	1.227	0.861	1.426	1.142	1.401	0.982	1.08236e-05	0.00166286	3.73894e-08	0.00523163	7.11561e-08	0.916148	378.6	464.6	325.8	331.6	3.45	3.61	3.1	5.67	1	2	3	2	5	35.4	8.27	0	5.501	387.1	380	377.3	356.9	464.4	490.4	464.6	443.9	473.9	330	339.4	321.6	316.2	344.8	353.6	319	315.3	355.1	360
Q9VCD9	Uncharacterized protein, isoform C OS=Drosophila melanogaster OX=7227 GN=BcDNA:RE30346 PE=1 SV=3	2.076	1.12	1.854	1.334	2.77	1.494	1.08877e-05	0.94417	2.44261e-05	0.00221283	4.40593e-08	0.000846187	712.7	1479.7	798	534.2	21.25	7.96	5.53	10.88	1	4	6	4	20	17.4	9.35	0	9.994	756.3	671.5	1020	668.8	1479.7	1453.1	1562	1308.9	1618.9	760.8	785.4	810.8	864.9	436.1	520.4	561	548.3	693.8	636.3
Q9W102	Origin recognition complex subunit 4 OS=Drosophila melanogaster OX=7227 GN=Orc4 PE=1 SV=1	1.336	1.082	1.235	1.019	1.361	1.102	1.11569e-05	0.159479	0.000395707	0.865237	3.8366e-06	0.0422522	1439.7	1923.7	1557.6	1413.4	2.59	4.64	3.57	7.6	1	14	27	14	39	51.9	8.22	0	93.802	1457.3	1422.3	1495	1412.6	1838.5	1967.5	1923.7	1765.3	1963.7	1638	1534.4	1581.2	1511.6	1500.3	1331.6	1305.4	1506	1336.8	1347.6
Q9VK59	LD23647p OS=Drosophila melanogaster OX=7227 GN=Dmel\CG5787 PE=1 SV=2	1.178	0.919	1.282	1.126	1.326	1.034	1.14627e-05	0.0016703	3.8992e-08	0.00023532	1.29081e-08	0.658649	14132.6	16653.1	12985	12556.5	2.09	1.76	4.74	2.93	1	52	130	52	54	100.2	9.74	0	250.889	14092.6	14632	13942.9	14172.7	16516.8	17151.6	16467.2	16653.1	16957.8	11941.3	13042.9	12927.3	13344.8	12820.5	12020.2	12380.6	12734.9	12928	13864
Q7K4B2	LD47540p OS=Drosophila melanogaster OX=7227 GN=l(2)k09848 PE=1 SV=1	0.805	0.909	0.886	0.951	0.766	0.864	1.16946e-05	0.00810487	0.00935469	0.332231	1.1222e-06	0.000371584	3235.9	2606.2	2940.5	3401.5	2.27	4.79	2.13	4.34	1	16	38	16	44	46.6	6.55	0	85.834	3331.7	3270.9	3166.3	3201.2	2702.3	2606.2	2573.1	2873.6	2573.6	2923.8	2988.9	2843.9	2957.2	3332.7	3555.6	3471.8	3223.2	3056.4	3099.2
Q95SH2	Charged multivesicular body protein 1, isoform A OS=Drosophila melanogaster OX=7227 GN=Chmp1 PE=1 SV=1	1.147	1.092	1.05	1.058	1.213	1.155	1.17057e-05	0.00130448	0.0659884	0.0676141	3.44678e-07	1.72559e-05	2659.9	3050.5	2905.4	2514.7	1.8	0.82	3.93	2.98	1	9	28	9	34	22.3	6.61	0	42.454	2685.7	2634.4	2710.6	2605.1	3050.5	3043.7	3075.3	3012.7	3071.2	2781.4	2862.2	3047.6	2949.2	2622.3	2470.1	2560	2466.2	2463.8	2496.1
Q9VT33	Ribose-phosphate pyrophosphokinase 2 OS=Drosophila melanogaster OX=7227 GN=Prps PE=1 SV=3	0.842	1.163	0.724	0.934	0.786	1.087	1.17374e-05	2.28289e-05	3.46149e-09	0.0210806	1.68497e-07	0.00589239	5631.4	4739.5	6550.5	6028.1	0.75	4.13	1.99	3.53	1	12	45	12	35	42.7	7.4	0	72.118	5648.6	5631.9	5630.9	5554.2	4785.9	4739.5	4695.3	4589.9	5114	6776.8	6560.5	6540.5	6473.8	6276	6160.7	5898.5	5825.9	5181.8	5336.3
A8DYP0	Obscurin OS=Drosophila melanogaster OX=7227 GN=Unc-89 PE=1 SV=1	1.452	1.051	1.382	0.992	1.441	1.043	1.18056e-05	0.785498	4.79837e-05	0.943624	2.66731e-05	0.980031	2416.5	3509.3	2539.9	2435.6	4.01	5.84	4.07	11.75	1	40	53	40	11	475.4	5.85	0	143.418	2349.3	2338.8	2532.5	2485.7	3620.3	3258.8	3418.2	3509.3	3803.7	2430.1	2651.4	2478.8	2602.6	2917	2391.7	2480.2	2228.5	2155.1	2216.1
Q9VSU7	Vesicle transport protein USE1 OS=Drosophila melanogaster OX=7227 GN=Use1 PE=2 SV=3	0.885	1.257	0.704	1.025	0.907	1.288	1.18598e-05	1.49501e-08	4.21758e-11	0.18052	0.000372238	2.56294e-09	1923.2	1701.9	2417.4	1876.4	1.6	2.29	2.89	2.31	1	13	28	13	48	28.3	9.44	0	81.648	1925.8	1969.1	1920.6	1894.7	1669.3	1701.9	1744.8	1738	1658.3	2411.1	2361.6	2528.9	2423.7	1881.1	1891	1871.7	1796.8	1766.6	1865.8
Q9VH80	TELO2-interacting protein 1 homolog OS=Drosophila melanogaster OX=7227 GN=Tti1 PE=1 SV=1	0.835	1.003	0.833	1.086	0.906	1.089	1.19753e-05	0.889355	4.43054e-06	0.0265779	0.00279751	0.00720596	3077.8	2569.6	3086.3	2835.2	2.12	3.52	2.2	4.79	1	26	37	26	26	123.7	5.99	0	125.485	3086.1	3069.4	2953	3088.2	2569.6	2620	2440.5	2635.2	2462.3	3196.8	3037.3	3072.9	3099.9	2966.8	2647.1	2797.6	2873.3	2831.1	2908.3
Q9VL89	Methionine aminopeptidase 2 OS=Drosophila melanogaster OX=7227 GN=und PE=1 SV=1	0.93	1.078	0.863	1.005	0.935	1.084	1.20951e-05	1.55842e-05	2.83361e-09	0.954871	2.56412e-05	7.79602e-06	7963	7409.6	8587.8	7922.4	1.54	0.63	1.06	2.07	1	18	56	18	39	49.8	6.68	0	83.694	8030.9	7843.4	8110.8	7895.8	7409.6	7383.5	7334.8	7410.5	7463.5	8543.8	8716	8632	8515.4	7890.6	7954.4	8138.1	7740.9	7367.2	7431.7
Q8MST5	Tubulin beta chain OS=Drosophila melanogaster OX=7227 GN=betaTub97EF PE=1 SV=1	0.87	0.783	1.111	1.151	1.001	0.902	1.2169e-05	2.66469e-07	0.0106303	6.10337e-05	0.871937	0.00410464	1918.8	1668.8	1502.4	1666.4	1.88	3.91	2.78	2.72	1	18	103	10	47	51.2	4.86	0	136.549	1888.5	1973.2	1909.3	1928.4	1668.8	1554.9	1588.8	1683	1702.4	1488.7	1494.6	1580.4	1510.3	1645.9	1687.2	1713.2	1610.6	1732.4	1869.6
Q9V4L4	NF-kappa-B inhibitor-interacting Ras-like protein OS=Drosophila melanogaster OX=7227 GN=kappaB-Ras PE=1 SV=1	0.732	0.824	0.888	0.909	0.665	0.749	1.22071e-05	0.00270978	0.0318678	0.255273	9.26979e-07	0.000104714	556.2	406.9	458.4	612.2	5.67	6.35	6.14	5.4	1	5	8	5	31	22.8	8.78	0	18.079	566.7	583.7	510.9	545.9	401.1	416	406.9	414.5	354.7	461.8	455.1	482.7	416	553.4	621.4	622.4	603.1	519.8	553
Q9V3K3	RuvB-like helicase 2 OS=Drosophila melanogaster OX=7227 GN=rept PE=1 SV=1	1.087	0.939	1.157	1.07	1.162	1.005	1.22117e-05	0.000420082	1.86851e-08	0.000116212	8.98285e-09	0.852893	8448.2	9179	7936.6	7899.1	0.34	2.27	1.51	0.7	1	26	90	26	53	53.5	5.85	0	169.73	8452	8491.8	8444.5	8422.4	9006.4	9246.9	9179	8916.2	9445.5	7854.5	7967.8	8131.5	7905.6	7940.1	7948.6	7858.2	7841.6	7753.5	8046.1
Q9VB75	GH08870p OS=Drosophila melanogaster OX=7227 GN=gb PE=1 SV=1	0.688	0.776	0.886	1.065	0.732	0.826	1.22213e-05	0.000654307	0.143315	0.450959	0.000127961	0.00973221	90.7	62.4	70.4	85.2	7.58	6.02	8.17	5.84	1	1	1	1	2	56.5	6.02	0	4.882	92.5	84.7	88.9	101.1	69.8	60.8	62.4	64.6	60.5	73.6	77.6	67.3	64.9	79.6	87.6	90.7	82.8	84.8	80.2
Q9VKZ6	Uncharacterized protein, isoform A OS=Drosophila melanogaster OX=7227 GN=Dmel\CG5381 PE=4 SV=2	1.459	1.007	1.449	1.133	1.653	1.141	1.22802e-05	0.998143	9.62894e-06	0.103657	4.75832e-07	0.137773	348	507.6	350.4	307.1	3.18	6.25	9.36	6.41	1	14	19	14	22	76.8	8.92	0	55.598	347	339.7	349.1	366	507.6	535.3	451.1	516.6	500.6	385.9	358.6	307.8	342.3	336.4	296.2	294.4	318.5	318.3	321.8
M9NEH9	Mushroom-body expressed, isoform K OS=Drosophila melanogaster OX=7227 GN=mub PE=1 SV=1	0.867	0.999	0.867	0.991	0.859	0.99	1.2386e-05	0.999413	1.46443e-05	0.890842	4.59634e-06	0.840669	2755.1	2387.7	2753	2780.2	1.84	3.08	2.61	2.17	1	9	16	9	17	58.1	8.37	0	34.93	2715	2807.6	2795.8	2713.6	2439.1	2387.7	2346.5	2361.9	2530	2806.1	2700.9	2822.4	2681.4	2799.4	2761.1	2736.7	2875.3	2490.6	2660.3
Q7JVH6	LD24696p OS=Drosophila melanogaster OX=7227 GN=Dmel\CG9436 PE=1 SV=1	1.144	1.149	0.996	0.825	0.944	0.948	1.24451e-05	7.64435e-06	0.847316	1.63299e-07	0.0041897	0.0255008	2367.1	2708.1	2719.4	2867.7	1.34	3.5	2.35	1.04	1	15	35	14	56	35.4	6.76	0	98.541	2332.7	2397.9	2346	2388.3	2639.6	2708.1	2741.2	2559.1	2803	2803.7	2745.8	2693.2	2656.5	2863.9	2863.9	2871.4	2926.1	2139.9	2272
Q9U9Q4	Eukaryotic translation initiation factor 3 subunit H OS=Drosophila melanogaster OX=7227 GN=eIF3h PE=1 SV=2	0.94	0.998	0.943	0.991	0.932	0.989	1.28513e-05	0.904037	3.51205e-05	0.999827	1.43658e-05	0.930326	5670.5	5333.1	5658.2	5720.6	1.17	1.02	1.32	1.81	1	13	84	13	45	38.4	6.1	0	115.764	5694.4	5646.8	5640.1	5784.2	5213.5	5337.2	5333.1	5273.5	5333.6	5736.5	5624.1	5566.7	5692.5	5539.6	5699.2	5742.1	5769.6	5223.8	5350.4
O76324	Discs overgrown protein kinase OS=Drosophila melanogaster OX=7227 GN=dco PE=1 SV=2	0.814	0.925	0.88	1.111	0.904	1.028	1.28546e-05	0.0549107	0.00144916	0.0179034	0.00462492	0.923899	1023.3	833	946.8	921.3	3.45	4.47	2.59	4.33	1	9	19	8	26	47.9	9.5	0	48.761	1003.1	1044	984.6	1060.6	833	798	837.8	896.2	813.3	916.3	944.6	949	976.1	895.7	907.8	934.9	986.6	920.2	989.2
Q8T6B9	Poly(U)-binding-splicing factor half pint OS=Drosophila melanogaster OX=7227 GN=hfp PE=1 SV=2	0.934	1.009	0.925	0.948	0.885	0.957	1.28944e-05	0.992191	8.68845e-06	0.000465986	2.05364e-08	0.000742802	3482.1	3250.7	3514	3672.7	1.36	1.35	1.02	1.35	1	22	54	22	45	67.9	5.96	0	136.871	3484.4	3565.4	3456.4	3479.7	3222.5	3250.7	3298.2	3325.8	3233.8	3502.6	3536.6	3456	3525.5	3650.4	3737.5	3695.1	3625.4	3196.4	3378.3
Q7JZN0	Protein transport protein Sec61 subunit beta OS=Drosophila melanogaster OX=7227 GN=Sec61beta PE=1 SV=1	0.844	0.882	0.957	1.004	0.847	0.885	1.2916e-05	0.000504892	0.198064	0.873492	3.97393e-05	0.0018399	2628.4	2219	2318	2619	2.64	2.24	1.46	5.07	1	6	34	6	60	10.2	11.65	0	38.283	2651.3	2605.7	2535.9	2698.5	2238.7	2219	2182.4	2292.4	2166.3	2289.8	2356.4	2293.7	2342.5	2394.1	2642.9	2692.9	2595.4	2432.2	2469
Q9VM58	hydroxymethylglutaryl-CoA lyase OS=Drosophila melanogaster OX=7227 GN=Hmgcl PE=1 SV=2	1.158	1.221	0.948	1.12	1.296	1.367	1.3032e-05	7.71818e-07	0.0617905	8.70267e-05	7.91958e-09	1.82842e-09	1557.3	1802.9	1901	1390.6	2.4	1.73	0.72	4.47	1	10	20	10	33	34.2	8.4	0	54.663	1544.7	1622.8	1541	1569.9	1843.4	1802.9	1783.9	1831.8	1769.6	1911.1	1907.6	1894.3	1881.3	1421.2	1360.6	1315.2	1454.3	1417.1	1537.7
A0A0B4LFF6	Uncharacterized protein, isoform B OS=Drosophila melanogaster OX=7227 GN=Dmel\CG8180 PE=4 SV=1	1.984	1.123	1.767	1.402	2.781	1.574	1.31114e-05	0.542789	0.000105962	0.0197652	1.76272e-07	0.00169209	368.8	731.5	414	263.1	13.06	18.02	4.37	12.51	1	9	14	9	17	62.8	6.73	0	35.083	314.6	360.7	432	377	668.1	779.3	731.5	607.5	961.5	423.4	403.9	442.5	404.8	283.8	239.7	243.9	310.1	288.6	341.8
Q9VYK6	Tomosyn, isoform C OS=Drosophila melanogaster OX=7227 GN=Tomosyn PE=1 SV=3	1.243	0.982	1.266	1.04	1.294	1.021	1.36707e-05	0.782821	3.69276e-06	0.61929	2.52808e-06	0.991268	1220.1	1517.2	1198	1172.8	2.79	6.23	2.6	1.82	1	18	28	18	15	158.4	7.05	0	77.324	1175.1	1222.7	1258.1	1217.5	1517.2	1582.9	1503.7	1364.4	1605.6	1198.1	1139.6	1206.6	1197.8	1186.2	1159.6	1200.4	1156	1078	1158.6
Q8IP90	Bruno 1, isoform B OS=Drosophila melanogaster OX=7227 GN=bru1 PE=2 SV=1	0.732	0.864	0.847	0.969	0.709	0.838	1.36904e-05	0.0220343	0.00404846	0.889064	5.0189e-06	0.00596907	5134.8	3757.3	4436.7	5297.3	6.08	8.83	4.48	2.78	1	13	39	12	15	88.2	7.06	0	52.118	5565.2	5325.7	4950.7	4903.1	3757.3	3834	3423.7	4252.9	3481.5	4281.3	4731.6	4352.9	4522.1	5554.6	5228.5	5343.2	5251.8	5105.3	5046.2
Q9W2M4	Farnesoic acid O-methyl transferase domain-containing protein OS=Drosophila melanogaster OX=7227 GN=Dmel\CG10527 PE=1 SV=1	1.842	1.022	1.801	1.229	2.264	1.257	1.3705e-05	0.999763	1.2114e-05	0.0102663	1.24087e-07	0.0120048	1271.1	2341.3	1299.7	1034	10.36	11.24	3.78	11.12	1	8	22	8	29	31.5	4.77	0	38.627	1305.3	1237.9	1499.8	1192.2	2362.9	2034.8	2341.3	1879	2471.3	1246.7	1339.3	1262.5	1338	846.9	1094.4	998.7	1070.6	1197.4	1172.9
Q0E910	Tapas, isoform B OS=Drosophila melanogaster OX=7227 GN=tapas PE=1 SV=1	0.749	0.826	0.907	1.064	0.797	0.879	1.37376e-05	0.000509122	0.210573	0.393277	0.000175953	0.00907196	5506.7	4124.3	4547.6	5174.4	2.69	8.25	1.15	1.96	1	32	61	32	31	138	7.78	0	174.978	5546.2	5557.3	5241.7	5467.4	4103.7	4131.8	4124.3	4897.6	4084.1	4478.3	4604.1	4536.1	4559	5038	5209.3	5139.8	5274.7	5087.9	5265.6
Q7KVW2	FI18256p1 OS=Drosophila melanogaster OX=7227 GN=Pop1 PE=2 SV=1	0.801	1.421	0.564	0.762	0.61	1.083	1.37954e-05	7.8676e-07	5.62924e-10	1.57753e-05	3.06625e-09	0.12898	1017.7	815.2	1446.3	1335.6	3.33	5.13	4.53	5.26	1	12	16	12	16	98.8	10.15	0	46.628	1014.1	1005.7	1021.4	1081.3	815.2	834.8	759	851.7	765.6	1438.6	1520	1361	1454.1	1332.5	1338.8	1418.8	1246.9	930.3	952.9
Q9VR56	tRNA methyltransferase 10 homolog A OS=Drosophila melanogaster OX=7227 GN=trmt10a PE=2 SV=1	0.832	0.912	0.912	1.234	1.026	1.125	1.39424e-05	0.0107334	0.00879811	1.78316e-05	0.994967	0.00837762	713	593	650.4	578	1.42	3.71	3.03	4.91	1	6	9	6	18	36.4	9.03	0	26.509	723.5	699	712.1	713.9	559.6	618.1	585.6	604.7	593	636	665.1	627.8	665.8	571.1	585	631.1	569	663.7	662.3
Q9VM72	RNA polymerase I subunit F OS=Drosophila melanogaster OX=7227 GN=Polr1F PE=1 SV=1	0.869	0.95	0.914	0.932	0.81	0.886	1.41164e-05	0.108027	0.000802482	0.0218007	1.97558e-07	0.000274186	1713.2	1488	1627.5	1837.4	2.17	1.57	1.51	4.61	1	10	22	10	34	28.5	9.14	0	45.956	1729.7	1763.9	1679.7	1697	1488	1469.9	1462.9	1516.5	1508.5	1623.3	1674	1621.2	1631.7	1930	1864	1811.2	1730	1586.7	1671.4
Q9VRW5	MIP10846p1 OS=Drosophila melanogaster OX=7227 GN=Dmel\CG10163 PE=2 SV=1	0.701	0.616	1.137	1.464	1.026	0.902	1.44194e-05	7.7257e-07	0.054322	1.70327e-05	0.990364	0.114546	1560.3	1093.1	961.4	1065.5	4.12	9.34	5.05	5.9	1	9	15	9	29	42.4	8.7	0	42.399	1581.6	1617.7	1469	1539.3	1195.8	1089	1093.1	1121.9	919.7	982.7	879.2	945.1	978.1	996.4	1096.2	1138.1	1035.7	1450.9	1532.8
Q9W2G8	Acyl-coenzyme A oxidase OS=Drosophila melanogaster OX=7227 GN=Acox57D-d PE=1 SV=1	1.261	1.394	0.905	0.724	0.914	1.01	1.45875e-05	2.85763e-07	0.00947868	4.33097e-07	0.0199249	0.979659	1646.4	2076.8	2294.7	2272.9	5.03	2.54	4.91	4.42	1	11	21	11	19	75.4	8.34	0	75.842	1576.9	1699.8	1750.2	1594.8	2074.9	2076.8	2095.5	2107.2	1975.4	2454	2178.7	2300.3	2289.1	2162.4	2289.2	2256.8	2406.6	1446.6	1610.5
Q9VS49	GEO05642p1 OS=Drosophila melanogaster OX=7227 GN=wrm1 PE=2 SV=1	1.224	0.95	1.288	1.151	1.408	1.093	1.46986e-05	0.432258	1.76447e-06	0.00137027	4.13295e-08	0.0228027	219.8	269.1	208.9	191.1	1.69	4.39	3.86	4.65	1	3	4	3	15	19.2	7.21	0	11.379	222.6	223.3	217	216.1	279.9	268.5	251	269.1	280	208	202.8	222	209.8	191.5	182.3	203.9	190.6	204.2	211.6
Q7KUX2	Uncharacterized protein, isoform B OS=Drosophila melanogaster OX=7227 GN=Dmel\CG4829 PE=1 SV=1	1.276	0.935	1.364	1.039	1.327	0.972	1.47143e-05	0.0833573	4.7461e-07	0.534854	2.23847e-06	0.59729	1205.3	1538.4	1127.5	1159.7	2.86	5.51	4.41	2	1	10	12	10	14	87.5	5.39	0	34.314	1198.9	1211.6	1257.4	1174.9	1551.5	1482.7	1538.4	1373.8	1586.5	1109.6	1145.6	1057.4	1171.5	1162.6	1156.7	1137.9	1193.8	1099.9	1148.1
A8DWJ8	NADPH oxidase, isoform C OS=Drosophila melanogaster OX=7227 GN=Nox PE=4 SV=1	1.326	1.3	1.02	1.085	1.438	1.411	1.47258e-05	3.58436e-05	0.995001	0.118701	6.05687e-07	1.45513e-06	2157.2	2860.6	2805.3	1988.7	7.04	3.56	1.35	5.99	1	30	53	30	26	151.5	8.73	0	133.143	2074.7	2093.1	2410.8	2223.3	2778.1	2928.6	2915.4	2687.8	2860.6	2771.3	2809.8	2862.3	2800.7	1977.2	2000.4	1918.5	2197.8	1903.3	1983.3
Q9VRY6	IST1 homolog OS=Drosophila melanogaster OX=7227 GN=Ist1 PE=1 SV=1	1.095	1.075	1.018	0.996	1.09	1.071	1.48979e-05	0.000148401	0.626045	1	1.49119e-05	0.000148553	1939.2	2122.5	2084.2	1946.6	2.38	1.15	1.71	1.21	1	12	21	12	30	45.6	5.96	0	52.316	1926.4	1952.2	2012.8	1906	2158.6	2091.7	2116.8	2122.5	2133.6	2069.8	2073	2147.3	2095.6	1961.7	1975.9	1931.6	1926.9	1767.2	1849.7
Q9VFV9	DnaJ-like-2, isoform A OS=Drosophila melanogaster OX=7227 GN=Droj2 PE=1 SV=1	0.881	1.005	0.876	0.954	0.841	0.96	1.49458e-05	0.997751	1.1496e-05	0.0335164	2.67903e-07	0.0464925	7714.3	6793.6	7756.2	8082.8	1.91	1.94	1.25	3.67	1	26	96	26	62	45.2	6.48	0	162.738	7765.3	7663.7	7510.2	7853.4	6793.6	6840.9	6736.3	7013.5	6662.3	7578.7	7764.5	7791.8	7747.9	7855.7	8426.3	8309.3	7862.4	7123.5	7261.4
Q7KNA0	Dymeclin OS=Drosophila melanogaster OX=7227 GN=CG8230 PE=1 SV=1	0.839	0.871	0.963	0.865	0.725	0.753	1.49573e-05	9.22669e-05	0.808004	9.37316e-05	8.99147e-09	3.74202e-08	565.3	474.1	492.2	653.9	1.95	3.87	2.96	3.05	1	7	15	7	11	79.1	6.01	0	39.945	565.9	564.8	556.2	582.6	490.4	468.7	468.5	512.1	474.1	474.9	507	484.6	500	633.7	643.7	678.1	664.3	519.1	535.1
O61267	Ovarian-specific serine/threonine-protein kinase Lok OS=Drosophila melanogaster OX=7227 GN=lok PE=2 SV=1	1.719	1.321	1.302	0.992	1.706	1.311	1.50642e-05	0.0180645	0.00564562	0.988054	2.41875e-05	0.0323907	88.2	151.6	116.5	88.9	3.52	9.12	6.85	18.14	1	3	3	3	7	54.2	9.11	0	10.365	92.4	88.2	88.2	84.8	153.2	147.5	178.4	151.6	141.6	122.7	104.3	118.4	114.6	111.9	98.1	75.8	80.5	84.7	83.6
Q6J5K9	Probable RNA helicase armi OS=Drosophila melanogaster OX=7227 GN=armi PE=1 SV=4	0.842	0.96	0.877	0.944	0.794	0.906	1.51073e-05	0.292996	0.000284667	0.207475	9.37687e-07	0.00798255	3297.9	2775.7	3166.3	3493.8	4.41	3.82	2.29	2.99	1	30	57	30	27	135.6	6.2	0	158.675	3535.2	3365.6	3231.5	3219.3	2918.6	2775.7	2625.2	2760.9	2818.4	3135.2	3285.9	3129.3	3197.7	3657.7	3406.4	3496.9	3490.7	3243	3189
P48607	Protein spaetzle OS=Drosophila melanogaster OX=7227 GN=spz PE=1 SV=3	1.155	0.987	1.171	0.974	1.125	0.961	1.52706e-05	0.807389	4.35842e-06	0.284904	0.00029822	0.0668977	496.5	573.7	489.9	510	3.37	2.03	1.79	3.57	1	6	10	6	23	37.4	6.61	0	18.846	486.5	506.7	483.4	518.8	570.8	573.7	575.5	562.7	594.4	488.9	501.1	490.9	479.8	513.6	506.4	504.7	544.3	446.3	480.1
P42282	Protein tramtrack, alpha isoform OS=Drosophila melanogaster OX=7227 GN=ttk PE=1 SV=3	0.757	0.873	0.867	1.026	0.777	0.896	1.54042e-05	0.0218421	0.00476735	0.896071	4.39905e-05	0.0762742	897.5	679.2	783.8	874.7	4.86	7.76	2.43	4.24	1	5	6	5	5	88.3	6.25	0	14.531	942	909.1	886.1	838.5	679.2	727	600.2	711.6	639.4	758.9	784.7	782.9	805.4	821.7	908.1	886.1	863.4	864.1	861.4
P48159	Large ribosomal subunit protein uL14 OS=Drosophila melanogaster OX=7227 GN=RpL23 PE=1 SV=2	0.885	0.941	0.941	1.009	0.893	0.95	1.55184e-05	0.00893725	0.0122991	0.960852	3.20144e-05	0.0217193	9359.1	8281.9	8805.6	9272.1	2.93	3.01	0.65	0.49	1	10	70	10	78	14.9	10.83	0	71.451	9650.5	9545.2	9088.3	9176.6	8281.9	8285.7	8190.2	8790.1	8191	8786.9	8889.2	8755.4	8824.3	9359.2	9263.5	9278.8	9265.5	8853	9044.2
M9NDI3	Sorting nexin 6, isoform B OS=Drosophila melanogaster OX=7227 GN=Snx6 PE=1 SV=1	0.883	0.983	0.898	1.046	0.923	1.028	1.55254e-05	0.591952	0.000111657	0.0214604	0.00490587	0.19612	5721.3	5049.3	5622	5471.5	2.28	2.37	0.99	3.25	1	16	41	16	32	50.8	6.49	0	82.595	5926.5	5662.8	5640.3	5780.4	5143.1	5011.4	4954	5260	5049.3	5577.4	5698.8	5593	5651.2	5377.1	5586	5567.5	5211.7	5436.7	5365.6
A8DY77	DNAation factor-related protein 2, isoform B OS=Drosophila melanogaster OX=7227 GN=Drep2 PE=1 SV=1	1.395	0.949	1.47	1.1	1.534	1.044	1.56387e-05	0.278698	1.23158e-06	0.219775	1.0106e-06	0.998442	1371.7	1913	1301.5	1247	5.94	3.32	6.66	7.35	1	9	14	9	19	57.8	5.57	0	40.831	1383.5	1297.5	1494.4	1359.9	1870.9	1913	1920	1772.7	1915.4	1358.4	1295.1	1158.9	1307.9	1396.5	1204.5	1195.7	1291.1	1269.2	1229.4
Q9VHI4	Splicing factor 3B subunit 5 OS=Drosophila melanogaster OX=7227 GN=Sf3b5 PE=1 SV=1	1.441	1.09	1.322	0.752	1.083	0.82	1.61003e-05	0.519852	0.000142733	0.000182622	0.577854	0.00192127	703.1	1013.3	766.8	935.6	7.17	7.62	6.09	5.09	1	3	5	3	39	10	6.35	0	17.136	656.4	684.2	773.7	722.6	1004.3	885.8	1013.3	1094.5	1042	693.8	769.5	803.8	764	1014.1	914.3	910.4	957.4	602.1	648.3
P07909	Heterogeneous nuclear ribonucleoprotein A1 OS=Drosophila melanogaster OX=7227 GN=Hrb98DE PE=2 SV=1	0.866	0.861	1.006	1.065	0.923	0.917	1.63239e-05	2.77497e-05	0.999995	0.0154979	0.00736499	0.010276	7844.9	6796.4	6756.6	7366.4	1.88	2.23	3.94	2.95	1	18	87	16	63	39	9.03	0	139.116	7976.1	7962	7729.5	7700.2	6646.1	6796.4	6588.3	6857.1	6956.2	6507	7048.6	6576.9	6941.1	7339.5	7393.4	7483.1	6990.6	7316.9	7544.1
P26270	26S proteasome non-ATPase regulatory subunit 7 OS=Drosophila melanogaster OX=7227 GN=Rpn8 PE=1 SV=6	1.101	1.149	0.958	0.957	1.054	1.099	1.64511e-05	3.39647e-07	0.0110376	0.00759804	0.015772	5.16007e-05	4707.8	5183.2	5408.4	4919.5	1.38	2.55	0.93	1.91	1	14	48	14	51	38.1	6.71	0	95.652	4608.6	4694.4	4762	4721.2	5044.7	5183.2	5378.8	5072	5188.2	5434.2	5382.7	5486.1	5378.4	4868.6	5084.2	4906.4	4932.7	4227.7	4448
Q9W0U0	glycerol kinase OS=Drosophila melanogaster OX=7227 GN=Gk1 PE=1 SV=1	0.855	0.899	0.951	1.055	0.902	0.949	1.66028e-05	0.00100997	0.132969	0.189082	0.000530757	0.0479743	2147.3	1836.8	1931.3	2035.9	4.59	1.73	1.67	3.2	1	11	18	11	25	58.8	5.36	0	50.831	2074	2067.7	2258	2223.2	1815.4	1833.7	1836.8	1899.6	1853.1	1976.5	1948.7	1906.4	1914.1	2012.2	2157.2	2044.1	2027.8	1902.6	1959.2
Q9VUQ5	Protein argonaute-2 OS=Drosophila melanogaster OX=7227 GN=AGO2 PE=1 SV=3	0.875	0.883	0.99	0.965	0.845	0.853	1.66306e-05	4.81934e-05	0.982892	0.715475	3.75293e-06	1.06794e-05	8268.1	7232.8	7302.4	8563.9	1.9	2.07	2.31	4.11	1	40	100	40	53	136.8	9.61	0	263.09	8277.1	8553	8197.1	8259.1	7289	7232.8	7003.6	7203.9	7414.2	7053.4	7258.3	7346.7	7448.7	8776.4	8068.6	8356.5	8788.3	7593	8104
Q9VK68	PITH domain-containing protein CG6153 OS=Drosophila melanogaster OX=7227 GN=CG6153 PE=2 SV=1	0.81	0.82	0.987	1.275	1.032	1.045	1.66379e-05	0.000150381	0.667587	1.55644e-05	0.964373	0.445902	1858	1504.3	1523.6	1457.4	5.41	3.58	3.08	4.21	1	7	18	7	28	23.9	5.57	0	32.68	1721.8	1938	1805.5	1912	1394.8	1511.4	1488.4	1504.3	1530.6	1598	1508.4	1538.9	1490.1	1492.6	1409.7	1423	1541.8	1579.5	1836.3
Q9VCK2	GILT-like protein 3 OS=Drosophila melanogaster OX=7227 GN=GILT3 PE=2 SV=1	1.449	0.748	1.937	1.213	1.757	0.907	1.66478e-05	0.000299219	1.8812e-08	0.00483148	9.24238e-08	0.405861	1010.1	1463.4	755.3	832.9	4.68	6.85	9.42	5.06	1	3	5	3	19	24.7	7.23	0	7.974	1001.6	1018.7	1070.9	956.3	1515.3	1335.2	1463.4	1334.4	1542.6	694.6	765.6	866.9	745.1	834.9	872.9	830.8	771.5	918.8	965.2
Q9VS52	AT11423p OS=Drosophila melanogaster OX=7227 GN=Dmel\CG14834 PE=2 SV=1	0.758	0.976	0.777	1.232	0.934	1.202	1.6867e-05	0.738542	8.12383e-05	0.00190426	0.0704983	0.0120603	7003.3	5309.1	6832.2	5684	6.06	10.11	3.63	4.4	1	23	59	23	44	46	10.24	0	126.911	6959.1	7007.4	7860.4	6999.2	5349.4	4851.7	5309.1	5315.7	4173.7	6966.2	6700.8	6572.1	7119.2	5809.6	5388.2	5946.1	5561.1	6384	6639.6
A0A0B4KEI4	Pre-lola-G, isoform C OS=Drosophila melanogaster OX=7227 GN=pre-lola-G PE=4 SV=2	2.116	0.989	2.14	1.121	2.371	1.108	1.69151e-05	0.982725	2.91067e-05	0.917528	6.80702e-06	0.75031	180.2	381.2	178.1	160.8	12.6	14.58	8.6	18.76	1	6	7	5	15	48	8.66	0	21.238	144.2	173.1	193.5	187.5	381.2	368	412.4	285	423	186.7	170	199.7	166.1	178.1	145.1	133.7	201.2	132.3	164
B7Z0C9	GH15104p1 OS=Drosophila melanogaster OX=7227 GN=Dmel\CG42307 PE=2 SV=1	1.123	1.015	1.107	0.935	1.05	0.949	1.70181e-05	0.493507	0.000164245	0.00792482	0.0157724	0.106691	579.8	651.3	588.5	620.3	2.75	3.45	1.72	1.73	1	4	6	4	35	11	9.98	0	21.58	552.5	589.1	579.9	579.7	651.3	688.9	632.1	674.6	646.7	604.2	593	584	581.8	625.8	614.9	628.6	605.2	506.8	558.2
Q9W148	Unconventional prefoldin RPB5 interactor-like protein OS=Drosophila melanogaster OX=7227 GN=uri PE=1 SV=1	0.929	0.963	0.965	1.022	0.949	0.983	1.70694e-05	0.007131	0.0177066	0.236062	0.000425319	0.236524	3153.3	2930.1	3035.3	3086.5	1.79	1.43	0.29	0.98	1	25	50	25	38	83.9	5.02	0	128.633	3066.7	3157.9	3201.7	3148.7	2977.4	2911.5	2900.6	2930.1	2997	3032.4	3020	3038.7	3038.3	3096.9	3052.9	3076	3123.9	2813.3	2992.2
Q8IN05	Liquid facets-Related, isoform D OS=Drosophila melanogaster OX=7227 GN=lqfR PE=1 SV=2	0.866	1.071	0.809	0.933	0.808	0.999	1.73413e-05	0.0119632	1.6123e-07	0.0101589	1.46459e-07	0.999729	3980.5	3448.5	4263.2	4267.5	2.76	3.6	1.44	1.5	1	24	58	24	18	157.9	5.4	0	133.529	3902.4	3880	4060.1	4098.2	3446.5	3448.5	3483.9	3699.3	3364.8	4311.9	4321.6	4205.8	4215.2	4195.6	4260.2	4351.7	4274.9	3579.9	3676.3
Q9W289	Golgi matrix protein 130 kD OS=Drosophila melanogaster OX=7227 GN=GM130 PE=1 SV=2	0.826	0.863	0.957	1.141	0.942	0.984	1.7454e-05	0.000970072	0.146856	0.00231535	0.0599632	0.957995	4267	3522.6	3681.1	3740.7	4.85	4.18	0.77	3.82	1	29	68	29	41	90.8	5.4	0	176.271	4207.5	4327.4	3974.8	4459.6	3522.6	3618.6	3398.7	3598.3	3272.8	3673.9	3670.4	3688.3	3732.4	3633.4	3606.6	3881.4	3851.2	3859.8	4100.3
Q8MSG8	Aprataxin-like protein OS=Drosophila melanogaster OX=7227 GN=CG5316 PE=2 SV=2	0.854	1.041	0.82	0.851	0.727	0.886	1.7522e-05	0.149421	8.24594e-07	1.13765e-05	2.89108e-09	0.00035415	677.7	579	705.7	796.3	3.6	3.73	1.41	2.11	1	9	15	9	15	76.4	9.44	0	29.346	684.8	704.8	646.8	670.8	614.5	566.9	558.2	586.9	579	724.4	702.9	704.3	707.1	820.9	805.7	786.9	785.5	628.2	667.8
Q9VHG4	ATPase H(+)-transporting accessory protein 2 OS=Drosophila melanogaster OX=7227 GN=ATP6AP2 PE=1 SV=1	0.844	1.035	0.815	1.04	0.877	1.076	1.75927e-05	0.724972	4.03985e-06	0.457318	0.000190399	0.0958416	2257	1904.3	2335.8	2170.8	2.46	4.17	2.33	4.61	1	6	16	6	18	34.4	5.82	0	27.007	2231.7	2270.8	2355.5	2243.2	1904.3	1873.2	1920.7	1983.9	1769.4	2345.4	2271.7	2403.4	2326.3	2113.7	2229.4	2315.6	2103.9	2047.3	2151.6
Q9VF89	Large ribosomal subunit protein bL9m OS=Drosophila melanogaster OX=7227 GN=mRpL9 PE=2 SV=1	1.301	1.084	1.201	1.047	1.362	1.135	1.80383e-05	0.171454	0.000654931	0.72512	4.13451e-06	0.0278734	3282.2	4270.3	3557	3135	6.94	6.58	2.72	0.85	1	13	24	13	49	28.8	9.26	0	53.415	3148.4	3421.6	3473.1	2996.6	4120	4665.6	4270.3	3901.1	4276.3	3586.3	3527.9	3390.7	3601.3	3162.2	3098.7	3128.2	3141.8	2888.2	3242
B7Z0I8	Titin OS=Drosophila melanogaster OX=7227 GN=clone 1.14 PE=1 SV=1	1.322	1.113	1.188	1.01	1.335	1.123	1.82208e-05	0.0358451	0.00353186	0.999993	1.89517e-05	0.0376126	9764.3	12910.8	10865.5	9671.5	3.06	7.45	3.4	3.44	1	101	207	101	34	378.4	4.93	0	535.084	9378.1	9703.8	10098.3	9825.2	12655.3	12910.8	12923.7	11162.8	13757	10503.5	10763.2	11380.4	10968.7	9657.2	9460.7	9685.7	10242.2	8603.1	9194.4
P32100	Large ribosomal subunit protein uL30 OS=Drosophila melanogaster OX=7227 GN=RpL7 PE=1 SV=2	0.901	0.929	0.97	1.044	0.941	0.97	1.82423e-05	0.000706362	0.210488	0.0212873	0.00610423	0.271348	13969.4	12590.9	12974.9	13377.5	1.96	1.68	2.08	1.64	1	18	116	18	56	29.5	10.89	0	110.338	14158.5	14139.1	13801.7	13597.4	12561.1	12965.4	12423.4	12791.3	12590.9	12862.6	13326.2	12705.8	13088.2	13474	13281.8	13500	13028.4	12988.4	13397
Q9NI63	Membrane-associated tyrosine- and threonine-specific cdc2-inhibitory kinase OS=Drosophila melanogaster OX=7227 GN=Myt1 PE=1 SV=2	0.87	0.98	0.887	1.004	0.874	0.985	1.82511e-05	0.849409	6.27031e-05	0.997015	2.45695e-05	0.927652	975.7	848.8	956.7	971.4	1.35	3.84	3.22	1.93	1	10	19	10	21	61.1	7.55	0	50.958	971.5	1000.4	977.3	974.1	872.2	848.8	798.6	879.5	833.5	1008.9	949	964.4	938.4	961.4	966.1	976.7	1003.5	891.2	947.9
Q29R10	LD24322p OS=Drosophila melanogaster OX=7227 GN=Dmel\CG7987 PE=1 SV=1	0.709	0.96	0.739	1.05	0.744	1.007	1.83304e-05	0.900055	5.20769e-05	0.955106	3.95635e-05	0.997931	519.7	368.4	498.7	495.1	4.77	10.23	2.42	2.44	1	11	15	11	10	141.8	6.86	0	40.24	512.9	527.7	475.5	526.5	378.1	330.7	368.4	431.2	349.2	477.9	505.1	496.7	500.7	489.2	498	516.4	492.3	470.5	500
Q9V3D9	Signal recognition particle 54 kDa protein OS=Drosophila melanogaster OX=7227 GN=Srp54k PE=1 SV=1	0.883	0.995	0.888	0.991	0.876	0.986	1.84023e-05	0.995454	2.59411e-05	0.921174	7.48292e-06	0.825571	6993.8	6178.1	6956.6	7055.7	1.46	3.51	1.55	1.63	1	24	92	24	48	55.8	8.7	0	184.903	7119.6	7012.6	6871.8	6975.1	6227.4	6178.1	6170.8	6536.7	5927.4	7099.1	6901.7	6860.8	7011.9	6939.4	7064	7047.3	7219.3	6531.3	6644.6
P54385	Glutamate dehydrogenase, mitochondrial OS=Drosophila melanogaster OX=7227 GN=Gdh PE=1 SV=2	0.889	0.92	0.966	1.142	1.015	1.051	1.84318e-05	0.000800066	0.188914	9.10502e-06	0.774402	0.0487957	11722.1	10419.7	10789.3	10267.7	2.38	1.94	2.09	2.49	1	24	104	24	47	62.5	8.27	0	167.819	11908.7	11656.2	11788.4	11269.1	10065.1	10449.2	10618.9	10404.3	10419.7	10825.1	10753.6	10931.4	10413.3	9924.7	10516.5	10363.9	10172.5	10924.5	11044.4
Q9VYA1	RE18811p OS=Drosophila melanogaster OX=7227 GN=Dmel\CG12177 PE=2 SV=1	1.252	0.984	1.272	0.961	1.203	0.945	1.88257e-05	0.916972	7.51441e-06	0.89023	5.5756e-05	0.547779	489.2	612.5	481.4	509.2	0.31	5.54	1.58	5.17	1	5	12	4	19	40.4	5.95	0	41.624	489.9	490.3	488.6	486.9	625.3	612.5	574	642	563.9	478.9	487.5	483.9	469.9	462.3	517.6	502.3	516.2	449.4	464.6
C8VV48	Karmoisin, isoform B OS=Drosophila melanogaster OX=7227 GN=kar PE=2 SV=1	0.799	0.835	0.957	1.013	0.81	0.847	1.89633e-05	0.000163688	0.689159	0.969829	3.69418e-05	0.000334018	1385	1107.3	1157.1	1366.7	5.32	5.35	1.52	2.08	1	6	15	6	12	64.5	8.43	0	34.366	1447.9	1425.8	1289.4	1345.4	1131.1	1107.3	1068.4	1211.5	1064.9	1124.3	1160.9	1153.3	1161.4	1382.2	1361.2	1372.1	1318.1	1328.3	1351
M9PBX3	Uncharacterized protein, isoform H OS=Drosophila melanogaster OX=7227 GN=Dmel\CG31689 PE=1 SV=1	1.175	0.979	1.2	0.944	1.109	0.925	1.9187e-05	0.27934	1.46795e-06	0.278342	0.000401557	0.0107681	488.1	573.3	477.9	516.9	4.05	2.04	1.54	3.24	1	10	18	9	20	70.2	7.87	0	38.593	495.7	522.9	480.3	480.6	570.4	553.1	573.3	583.4	579.2	475.3	466.4	482.9	480.6	529	508.9	525	492.5	454.7	495.5
M9MRD1	Muscle-specific protein 300 kDa OS=Drosophila melanogaster OX=7227 GN=Msp300 PE=1 SV=1	1.206	0.991	1.217	0.961	1.158	0.952	1.93004e-05	0.987181	1.19611e-05	0.157373	0.000782329	0.0910131	6221.2	7500.1	6162.6	6474.9	1.56	4.52	1.24	6.09	1	148	183	148	14	1404.3	5.21	0	497.97	6285.1	6337.9	6157.9	6137.8	7748.7	7500.1	7202.5	7497.4	8124.2	6091.4	6159.5	6276.5	6165.6	7241.1	6476.5	6473.4	6367.1	5765.7	6005.2
A1Z7W1	SET and MYND domain containing, class 4, member 1, isoform B OS=Drosophila melanogaster OX=7227 GN=Smyd4-1 PE=4 SV=1	0.875	0.806	1.086	0.912	0.797	0.735	1.95065e-05	4.58309e-08	0.000231943	0.00109752	4.40754e-08	8.32333e-10	1136.1	993.7	915.3	1246.1	0.9	2.7	1.71	3.33	1	13	18	13	19	86.9	6.21	0	43.644	1134.6	1147.5	1122.8	1137.5	1017.5	990.2	993.7	1046.7	978.6	916.7	892.4	914	930.2	1243.1	1277.1	1179.5	1249.1	1040.9	1087.3
Q9VS34	Large ribosomal subunit protein eL18 OS=Drosophila melanogaster OX=7227 GN=RpL18 PE=1 SV=1	0.832	0.922	0.902	1.022	0.85	0.942	1.9513e-05	0.0184896	0.00772383	0.977819	3.54918e-05	0.0380737	4536	3772.1	4183.9	4439.2	3.44	4.4	2.34	2.01	1	9	53	9	43	21.7	11.53	0	51.489	4631.2	4653.5	4329.9	4442.8	3700.5	3772.1	3866	4086.4	3666.9	4239.2	4244.2	4040.7	4129.4	4603.6	4428.4	4450.1	4404.6	4248.5	4409.3
Q9V468	Zinc finger matrin-type protein CG9776 OS=Drosophila melanogaster OX=7227 GN=CG9776 PE=1 SV=1	0.854	0.977	0.874	1.1	0.939	1.074	1.99682e-05	0.611321	0.000140155	0.00615788	0.0253796	0.0589235	1173.8	1002.7	1146.9	1067.5	2.37	3.64	2.17	2.29	1	22	37	22	18	140.2	9.35	0	82.554	1173.5	1188.7	1125.4	1174.1	1022.5	1002.7	970.8	1069.5	996.7	1101.7	1140.6	1154.1	1153.4	1057.1	1066	1112.3	1069	1076.6	1126.3
Q7JVZ8	Glutathione S transferase E11, isoform A OS=Drosophila melanogaster OX=7227 GN=GstE11 PE=1 SV=1	0.823	0.682	1.207	1.357	1.117	0.925	2.00905e-05	3.39171e-08	0.00013087	7.32771e-07	0.0324239	0.0435665	1247.5	1026.7	850.4	919.1	3.75	4.99	1.9	4.73	1	4	15	4	24	25.1	5.87	0	35.214	1228.7	1304.7	1196.6	1266.7	987.4	1029.8	1026.7	943.5	1078.3	865.8	831.8	860.5	840.5	898.8	888.6	939.9	984.9	1127.1	1236.3
Q9V3Z6	Myosin-VIIa OS=Drosophila melanogaster OX=7227 GN=ck PE=1 SV=1	0.888	0.905	0.981	1.031	0.916	0.933	2.01754e-05	0.000413279	0.376638	0.292891	0.0004003	0.010759	4211.5	3741.3	3813	4085.3	1.84	3.62	1.22	1.27	1	64	91	64	32	250.2	8.92	0	253.465	4203	4303.6	4114.3	4220.1	3741.3	3760.1	3677.4	3937.2	3566.2	3806.4	3812.5	3813.5	3904.3	4016.2	4083.1	4087.5	4142.6	3855.7	4077.7
O46102	Poly(A) RNA polymerase, mitochondrial OS=Drosophila melanogaster OX=7227 GN=MTPAP PE=2 SV=2	0.857	0.948	0.904	0.979	0.839	0.928	2.07325e-05	0.0882808	0.00160475	0.841722	6.36953e-06	0.0202116	862.7	739.3	817.5	881.2	1.32	4.03	3.29	1.45	1	9	18	9	15	68.5	8.34	0	38.323	870.6	854.9	851.8	874.8	740.8	723.8	729.6	798.9	739.3	853.1	814.7	787.5	820.3	881.1	859.1	888.7	881.2	798.6	810
Q9V5C6	Proteasome subunit alpha type-3 OS=Drosophila melanogaster OX=7227 GN=Prosalpha7 PE=1 SV=1	1.12	1.124	0.996	0.942	1.056	1.06	2.07875e-05	3.44896e-05	0.999981	0.0278649	0.00544829	0.00752618	5354.3	5998.1	6019.4	5681.2	0.71	3.31	1.84	2.25	1	16	63	16	67	27.7	5.69	0	100.068	5348.7	5295.2	5385.6	5360	5858.6	5998.1	6263.4	5811	6192.1	6091.6	5917.3	6148.1	5948.1	5748	5717.7	5644.9	5464.8	4906.6	5017.3
O18680	5-aminolevulinate synthase OS=Drosophila melanogaster OX=7227 GN=Alas PE=2 SV=1	0.62	0.843	0.735	0.905	0.561	0.763	2.0958e-05	0.0899649	0.0015938	0.49868	2.81762e-06	0.00671702	500.9	310.5	422.3	553.7	12.32	12.56	4.69	2.96	1	6	7	6	12	58.7	7.39	0	24.417	578.1	546.1	452.4	459.4	297.6	329.9	310.5	368.1	261.6	420.4	451.8	403.8	424.3	544.3	561.4	579.8	546.1	530.3	517.4
P05552	Transcription factor Adf-1 OS=Drosophila melanogaster OX=7227 GN=Adf1 PE=2 SV=2	0.842	0.993	0.848	1.077	0.907	1.07	2.09967e-05	0.999908	2.30429e-05	0.0177909	0.00884479	0.0199407	323.8	272.8	321.6	300.7	2.93	3.15	1.44	5.45	1	4	6	4	15	30.2	8.22	0	23.815	328.3	335.1	319.3	313.7	281.8	260	264.2	273.6	272.8	320.7	320.5	330.4	322.6	274.2	312.4	301.4	300.1	301.2	317.5
Q9VXR5	LD02975p OS=Drosophila melanogaster OX=7227 GN=Dmel\CG9281 PE=1 SV=1	0.846	0.946	0.894	0.93	0.787	0.88	2.1117e-05	0.167526	0.000813456	0.0469241	4.32393e-07	0.000866981	14339	12127.9	13562.9	15413.6	1.7	4.99	2.95	2.15	1	27	109	27	43	69.5	7.53	0	173.013	14547.4	14124.3	14133.6	14554.1	11931.4	12202.1	12127.9	12921.8	11239.1	14075.8	13776	13353.1	13192.4	14975.5	15785.2	15414	15413.3	13345.2	13382.9
Q9VGN4	Sarcomere length short, isoform B OS=Drosophila melanogaster OX=7227 GN=sals PE=1 SV=2	1.236	0.997	1.24	1.003	1.24	1	2.1245e-05	0.997972	2.7638e-05	0.961016	4.43938e-05	0.989219	920.3	1137.3	917.3	917.1	2.74	3.5	2.28	6.06	1	11	13	10	10	104.8	5.57	0	27.429	946.7	914.3	886.4	926.3	1142	1116.8	1051.6	1137.3	1146.1	922.2	904.2	912.3	952.3	1009.8	934.6	882.4	899.9	868.4	866.3
Q9VDT1	Short-chain specific acyl-CoA dehydrogenase, mitochondrial OS=Drosophila melanogaster OX=7227 GN=Arc42 PE=1 SV=1	1.192	1.244	0.958	1.034	1.232	1.286	2.12899e-05	7.16886e-06	0.6074	0.652994	4.06281e-06	1.6406e-06	4481.3	5342.4	5575.9	4334.8	3.23	4.14	2.88	3.59	1	14	47	14	40	43.6	7.88	0	97.699	4383.8	4426.8	4710.6	4536.6	5342.4	5318.2	5775.8	5183.3	5356.8	5653.2	5354.9	5709.4	5499.7	4257.2	4340	4329.6	4615.2	4021.6	4194.4
Q24323	Semaphorin-2A OS=Drosophila melanogaster OX=7227 GN=Sema2a PE=1 SV=2	1.742	1.094	1.592	1.058	1.842	1.157	2.13426e-05	0.989131	3.4079e-05	0.388063	2.18582e-06	0.252752	1896	3303.1	2074.4	1792.8	13.26	13.46	4.22	4.76	1	15	28	14	22	82.9	7.93	0	56.474	1897.4	1869.7	2422.5	1894.5	3303.1	3061.6	3544.8	2856.3	4020.4	2137	1932.6	2079.7	2069.1	1857.3	1703.2	1730.5	1868.8	1740.6	1771.5
Q94518	Nascent polypeptide-associated complex subunit alpha OS=Drosophila melanogaster OX=7227 GN=Nacalpha PE=1 SV=2	0.821	1.018	0.807	0.942	0.773	0.959	2.15757e-05	0.891871	7.76876e-06	0.181176	1.13367e-06	0.483011	5364.9	4404.9	5461.3	5696.9	3.62	5.44	1.47	2.06	1	8	73	8	47	23	4.74	0	73.754	5276.5	5454.7	5167.5	5608.9	4477.7	4277.4	4404.9	4890.6	4332.7	5434.3	5391.8	5488.5	5578.3	5527.6	5692.2	5701.6	5812.1	4840.5	5168.4
M9PFR8	Artemis, isoform B OS=Drosophila melanogaster OX=7227 GN=Arts PE=4 SV=1	0.92	0.999	0.921	0.949	0.873	0.948	2.16767e-05	0.998044	1.67778e-05	0.00190281	6.49701e-08	0.00258653	11431.2	10520.7	11419.3	12051.4	1.23	1.88	0.5	1.99	1	37	154	37	43	120.8	4.86	0	278.588	11465.4	11232.2	11397.1	11567.4	10708.5	10520.7	10445.1	10290.5	10781.9	11390.8	11402.5	11517.9	11436.1	12086	11716.6	12016.9	12295.7	10517.9	10642.6
Q9VKA1	FI02817p OS=Drosophila melanogaster OX=7227 GN=Dmel\CG6583 PE=2 SV=1	1.33	0.964	1.38	1.066	1.417	1.027	2.16823e-05	0.568866	3.41121e-06	0.436391	2.5023e-06	0.995123	224.2	298.1	216.1	210.4	6.44	4.51	8.39	2.58	1	1	2	1	5	17.3	7.75	0.001	3.231	238.1	233.7	208.1	215.1	310.6	282.8	298.1	318.2	297.2	187.5	220.7	228.5	211.5	202.1	209.7	215	211.1	218.4	221.4
Q9VBI0	Pre-rRNA-processing protein TSR2 homolog OS=Drosophila melanogaster OX=7227 GN=Dmel\CG14543 PE=2 SV=1	0.77	1.062	0.725	1.03	0.793	1.094	2.1743e-05	0.311535	1.80009e-06	0.8315	8.04585e-05	0.0813742	678.3	522.3	720.3	658.4	4.37	6.93	3.21	4.7	1	4	13	4	26	22.5	4.41	0	31.425	690.3	666.6	636.2	703.1	522.3	544.5	501.6	555.3	465.4	698.1	738	703	742.7	616.3	679.7	677.4	640	633.3	631.6
Q9VHS8	Eukaryotic initiation factor 4A-III OS=Drosophila melanogaster OX=7227 GN=CG7483 PE=1 SV=1	0.845	0.966	0.876	0.986	0.834	0.952	2.18092e-05	0.518857	0.000201865	0.90443	8.21827e-06	0.210545	5648.8	4775.2	5454.1	5727.3	3.04	4.09	2.72	1.84	1	21	66	18	48	45.6	6.02	0	130.034	5839	5686	5425.6	5611.8	4586	4918.7	4709	5097	4775.2	5314.6	5649.4	5385.6	5523.4	5798.3	5657.1	5827.9	5612.9	5356.5	5387.6
O44342	Protein windbeutel OS=Drosophila melanogaster OX=7227 GN=wbl PE=1 SV=1	0.65	0.922	0.705	0.991	0.644	0.914	2.21241e-05	0.700794	0.000121976	0.981987	1.28711e-05	0.486651	2968.5	1930	2737.9	2994.7	6.37	12.62	2.44	6.79	1	13	31	13	55	29.4	6.44	0	71.035	2990.6	2946.5	2653.5	3083.8	1930	2016	1794	2205.5	1566	2716.4	2796.5	2641.6	2759.5	2739.3	3074	3209.7	2917.4	2743.5	2791.9
P40320	S-adenosylmethionine synthase OS=Drosophila melanogaster OX=7227 GN=Sam-S PE=2 SV=2	0.649	1.02	0.636	1.031	0.668	1.051	2.21306e-05	0.949053	1.017e-05	0.92288	5.74658e-05	0.662411	4653.9	3018.6	4745.2	4516	5.33	10.95	4.26	9.68	1	13	29	12	32	44.7	6.54	0	74.798	4939.9	4638.4	4334.5	4669.3	3027.3	2982.7	3018.6	3650.8	2741.2	4697.8	5070.4	4595.3	4793.1	4027.5	4889.8	4835.7	4217.5	4531.6	4395
Q8IQV1	PAPS synthetase, isoform D OS=Drosophila melanogaster OX=7227 GN=Papss PE=1 SV=1	0.883	0.905	0.976	0.994	0.877	0.899	2.22105e-05	0.000989077	0.189522	0.986416	1.35781e-05	0.000559641	3480.6	3072.7	3148.7	3503.2	1.37	3.9	1.67	1.2	1	23	53	23	46	74	7.08	0	128.561	3476	3518.5	3405.3	3485.2	3099.6	3066.7	3072.7	3197.8	2869.4	3149.2	3138.4	3148.2	3250.7	3498.8	3431.8	3529.1	3507.5	3188.8	3333.8
Q9VCY7	Elongation of very long chain fatty acids protein OS=Drosophila melanogaster OX=7227 GN=bond PE=2 SV=1	0.591	0.91	0.649	1.118	0.661	1.018	2.23994e-05	0.540538	0.000195214	0.417819	0.000285001	0.995896	499.7	295.5	454.9	446.8	8.22	12.65	6.52	12.17	1	3	7	3	9	36.9	9.61	0	11.975	542.1	519.5	449.9	480.6	278.2	295.5	302.3	347.7	245.8	478.4	462.6	409.9	447.4	378.2	468.5	503.2	426	497.3	492.3
Q9VWD9	LD38919p OS=Drosophila melanogaster OX=7227 GN=Ubqn PE=1 SV=1	0.851	0.964	0.883	1.039	0.885	1.002	2.24669e-05	0.177138	0.000823032	0.215965	0.000654994	0.999217	4861.8	4138.6	4686.4	4677.3	2.65	2.87	2.3	4.7	1	22	107	22	58	58.8	5.11	0	264.087	4850.9	4872.8	4785.9	5085.3	4138.6	4013.4	4106.8	4331.9	4211.7	4508.7	4708	4664.9	4755.3	4537.7	4821.2	4900.8	4443.3	4450	4617.1
Q8MZI3	RNA helicase OS=Drosophila melanogaster OX=7227 GN=DmRH5 PE=1 SV=1	0.82	0.913	0.898	0.944	0.774	0.862	2.25465e-05	0.00933166	0.0191457	0.510372	3.08801e-06	0.00075485	8057.9	6611.2	7360.5	8538	3.33	4.93	3.79	3.37	1	38	142	34	54	88.2	9.36	0	261.763	8449.8	8185.9	7932	7854.6	6724.5	6611.2	6445.6	7107	6235.8	6865.2	7485.3	7333.8	7387.3	8458	8029.3	8645.5	8618.7	7751.5	7756.2
Q7KRW4	Aminopeptidase OS=Drosophila melanogaster OX=7227 GN=superdeath PE=1 SV=1	1.384	1.207	1.147	0.969	1.342	1.17	2.2953e-05	0.0118279	0.0152585	0.885658	7.01379e-05	0.0441499	4736	6556.1	5716.3	4886.1	5.65	8.78	3	8.02	1	31	83	31	38	115.2	5.99	0	172.606	4434.8	4768.7	5087.4	4703.5	6556.1	6551.1	6969.1	6009.6	7602.9	5861.1	5469.9	5780.8	5652.6	5201.3	4590	4582.3	5328	4068.3	4518.4
Q9VHN9	BLOC-2 complex member HPS5 homolog OS=Drosophila melanogaster OX=7227 GN=p PE=2 SV=1	0.675	0.815	0.829	0.965	0.652	0.786	2.31575e-05	0.0066578	0.0282908	0.7851	6.03353e-06	0.00125205	67	45.3	54.6	69.5	11.1	3.99	8.07	3.47	1	2	2	2	2	93.6	5.91	0	4.785	69.2	73.9	56.6	64.9	45.3	48.3	45.9	43.2	45.2	47.4	57.5	55.3	54	68.4	66.1	70.6	71.5	63.5	70
M9PB92	CCR4-NOT transcription complex subunit 4, isoform K OS=Drosophila melanogaster OX=7227 GN=Cnot4 PE=1 SV=1	0.886	1.021	0.868	0.977	0.866	0.998	2.32122e-05	0.439997	2.6793e-06	0.542703	3.41411e-06	0.997659	6922.4	6134.7	7070.2	7085.7	1.7	3.49	1.04	2.26	1	35	79	35	44	117.6	6.79	0	191.25	6929.8	6914.9	6729	7003.8	6134.7	6042.7	6196.3	6350.9	5776.3	7120.7	7015.8	7020	7163.8	7089.2	6839.8	7082.2	7223.5	6357.1	6552
Q9I7S8	Bifunctional phosphoribosylaminoimidazole carboxylase/phosphoribosylaminoimidazole succinocarboxamide synthetase OS=Drosophila melanogaster OX=7227 GN=Paics PE=1 SV=2	0.902	0.936	0.964	1.026	0.925	0.96	2.32489e-05	0.00140685	0.141565	0.438713	0.00027784	0.0229253	7735.3	6976.6	7238.7	7538.3	1.85	1.39	1.06	2.5	1	22	73	22	50	47.3	8.07	0	135.209	7753.7	7735.7	7734.9	7458.1	6913.2	7078.1	7156.4	6976.6	6967.2	7223.7	7275.4	7253.7	7103.6	7285.2	7736.8	7498.1	7578.8	7112.9	7329.6
B7Z0E2	RNA-binding protein Unr OS=Drosophila melanogaster OX=7227 GN=Unr PE=1 SV=2	1.132	1.117	1.014	0.931	1.054	1.04	2.34454e-05	0.000106679	0.905717	0.00610049	0.0315134	0.128155	4572.2	5176.6	5106.9	4910.5	0.79	2.09	2.48	3.69	1	30	73	30	30	116.5	6.55	0	154.967	4552.9	4552.5	4628.5	4591.6	5077	5303.6	5176.6	5081.4	5287.8	5301.7	4998.2	5121.6	5092.2	5048.9	4776	4754.7	5105.5	4176.6	4313.6
P98149	Dorsal-related immunity factor Dif OS=Drosophila melanogaster OX=7227 GN=Dif PE=1 SV=2	1.95	1.017	1.918	1.063	2.073	1.08	2.3867e-05	0.983173	1.40254e-05	0.758093	5.78833e-06	0.921211	211.6	412.5	215.1	199	6.22	17.23	6.66	5.18	1	4	5	4	7	73.9	5.92	0	8.373	211.3	211.8	236.5	206.6	408.4	412.5	432.7	280.3	456.8	215.5	220.9	189.6	214.7	211.1	187.6	203.9	194.3	193.9	200.6
M9PI37	Sodium chloride cotransporter 69, isoform E OS=Drosophila melanogaster OX=7227 GN=Ncc69 PE=1 SV=1	1.276	1.14	1.119	0.876	1.117	0.998	2.41282e-05	0.00770087	0.0255802	0.0149582	0.0127049	0.982831	4707.1	6004.9	5366.1	5376.2	4.54	4.9	1.22	4.67	1	33	73	33	31	133.4	7.69	0	174.568	4631.6	4698.8	5110.4	4715.4	6004.9	5450.2	5841	6159.8	6130.8	5331	5476.5	5387.1	5345.2	5541.6	5527.1	5229.3	5026.3	4248.8	4452.2
P07185	Chorion protein S15 OS=Drosophila melanogaster OX=7227 GN=Cp15 PE=3 SV=1	2.612	0.814	3.21	1.144	2.989	0.931	2.41899e-05	0.221082	1.46309e-06	0.338181	2.12892e-06	0.990579	1016.3	2654.4	826.9	888.1	21.91	27.86	4.58	9.14	1	6	19	6	74	12	8.92	0	47.591	969.5	912	1446.7	1065.3	2687	4063.5	2559.7	1952.5	2654.4	786.8	878.6	820	833.9	900.1	750.6	930.3	876.3	889.4	864.1
Q9VL24	Niemann-Pick type C-1a, isoform A OS=Drosophila melanogaster OX=7227 GN=Npc1a PE=1 SV=2	0.883	1.025	0.862	0.94	0.83	0.963	2.50957e-05	0.867986	8.25341e-06	0.0367899	4.22618e-07	0.139319	1994.2	1761.7	2044.5	2122.1	1.32	2.61	2.88	2.81	1	12	20	12	8	143.2	5.58	0	41.391	2043.8	1996.3	1986.2	1992.2	1761.7	1751.5	1801.9	1823.2	1704.4	2058.6	2089	1952.3	2030.4	2078.6	2166.5	2172.7	2056.8	1874.9	1891.5
Q8SZY4	Ecto-5'-nucleotidase 2, isoform A OS=Drosophila melanogaster OX=7227 GN=NT5E-2 PE=1 SV=1	1.5	0.893	1.68	0.759	1.139	0.678	2.55716e-05	0.218813	1.51965e-06	0.00192814	0.115541	6.67315e-05	543.8	815.9	485.8	716.3	4.39	11.19	6.09	8.91	1	12	19	10	21	64.4	6.14	0	56.075	545.3	583.6	526.9	542.4	828.9	780.9	815.9	737.2	982.4	466.6	521.4	505.7	460.3	806.8	735.6	697.5	654.8	500.2	553
Q7KRR5	Peptide-N(4)-(N-acetyl-beta-glucosaminyl)asparagine amidase OS=Drosophila melanogaster OX=7227 GN=Pngl PE=1 SV=1	0.886	0.934	0.948	1.035	0.917	0.967	2.58095e-05	0.00458938	0.0479644	0.179837	0.000956069	0.213997	1582.4	1401.6	1478.1	1529.1	4.26	1.19	1.18	2.41	1	14	21	14	26	73.3	7.88	0	72.73	1590	1574.8	1688.6	1526.7	1391.5	1401.6	1395.4	1430	1421.1	1459	1478.1	1478.1	1501.6	1582.1	1542.4	1496.7	1515.9	1458.6	1492.1
Q9VXB0	NECAP-like protein CG9132 OS=Drosophila melanogaster OX=7227 GN=CG9132 PE=2 SV=1	0.926	0.967	0.958	1.009	0.934	0.975	2.58208e-05	0.109546	0.00166571	0.557065	0.000218348	0.668598	3576.8	3311.5	3457.9	3544.8	1.87	1.21	2.42	1.04	1	11	28	11	43	26.6	8.81	0	49	3561.3	3675.8	3592.3	3516.9	3311.5	3259.3	3254.1	3312.6	3348.5	3473.5	3410.5	3602.9	3442.4	3475.5	3552.1	3537.5	3553.2	3267	3482.9
Q9VF77	Translin-associated protein X OS=Drosophila melanogaster OX=7227 GN=Trax PE=1 SV=3	0.84	0.899	0.934	1.036	0.87	0.932	2.58559e-05	0.00791755	0.0271391	0.833012	9.64921e-05	0.0368267	1048.3	880.5	942.9	1011.8	3.85	2.46	3.78	4.02	1	11	23	11	39	34.3	5.77	0	54.337	1084.1	1065.9	1030.9	993.2	863.1	905.9	880.5	848.9	882.1	990.7	908.8	928.1	957.8	1076.9	994.1	987.2	1029.8	994.5	1010
A0A0C4DHC8	Aldehyde dehydrogenase type III, isoform Q OS=Drosophila melanogaster OX=7227 GN=Aldh-III PE=1 SV=1	1.168	1.178	0.991	1.036	1.209	1.221	2.59959e-05	2.01182e-05	0.932449	0.222386	1.56153e-06	1.43585e-06	3934	4593.3	4635.8	3798.3	1.98	4.17	2.32	2.25	1	14	33	14	25	63	6.48	0	75.134	3917.4	3950.8	4069	3891.1	4596.1	4524.4	4867.9	4335.3	4593.3	4510.4	4681.6	4757.5	4590.4	3752.5	3880.7	3844.6	3693.6	3593.6	3743.4
P11146	Heat shock 70 kDa protein cognate 2 OS=Drosophila melanogaster OX=7227 GN=Hsc70-2 PE=1 SV=2	1.384	0.994	1.393	1.027	1.421	1.02	2.60621e-05	0.999935	2.39726e-05	0.929443	1.07841e-05	0.94576	526.3	728.4	523	512.6	1.45	8.23	5.94	3.45	1	14	50	9	24	69.7	7.18	0	63.249	518	531.9	520.8	532.9	729.8	607.2	728.4	757.7	706.4	490.1	515.8	565	530.3	535	508.8	516.3	492.3	475.2	504
Q9V463	Nuclear pore complex protein Nup154 OS=Drosophila melanogaster OX=7227 GN=Nup154 PE=1 SV=1	1.115	1.148	0.971	0.873	0.973	1.003	2.61406e-05	1.058e-05	0.702347	7.09e-06	0.518249	0.990162	5638.6	6285	6474.9	6457.2	1.01	1.61	2.34	3.46	1	41	95	41	34	153.8	6.58	0	239.238	5598.9	5710.6	5678.6	5597.3	6248.9	6488.5	6285	6238.5	6329.8	6501.2	6205	6539.8	6448.8	6692.5	6214.6	6325.2	6591.9	5136.2	5410.8
P49021	Protein timeless OS=Drosophila melanogaster OX=7227 GN=tim PE=1 SV=3	0.688	1.038	0.663	0.881	0.607	0.915	2.62755e-05	0.932249	1.10086e-05	0.343943	2.32272e-06	0.669281	262.1	180.4	272.2	297.4	11.22	6.02	7.41	8.44	1	6	7	6	5	156.3	5.25	0	10.9	244	281.5	239.5	301.6	185.4	182.4	169	180.4	160.2	255.4	264.1	301.7	280.6	312.5	265.5	283.1	318.3	223.9	266.7
A1ZAE2	BTB domain-containing protein OS=Drosophila melanogaster OX=7227 GN=Dmel\CG8060 PE=4 SV=1	1.182	0.947	1.249	1.057	1.25	1.001	2.65503e-05	0.0834524	7.6033e-07	0.196303	1.43506e-06	0.953096	589.3	696.8	557.8	557.4	3.28	5.32	3.45	2.26	1	8	9	8	7	135.5	7.39	0	14.222	602.2	573.9	613.4	576.6	761.5	688.2	685.9	696.8	757.7	558.4	557.3	522	563	564.2	550.6	544.6	572.2	552.5	543.8
A0A126GUV7	non-specific serine/threonine protein kinase OS=Drosophila melanogaster OX=7227 GN=fray PE=1 SV=1	1.093	1.004	1.088	0.991	1.083	0.995	2.67957e-05	0.702654	0.000149832	0.601747	0.000200056	0.998065	2352.6	2571.2	2362.8	2374	1.51	1.58	1.76	1.92	1	16	35	16	27	77.9	6.9	0	85.982	2293.4	2355.1	2376.5	2350	2511.6	2571.2	2501.3	2572.4	2590.7	2434.8	2337.7	2363.4	2362.3	2330.5	2384.6	2439.5	2363.4	2103.9	2231.5
Q9VWD0	GH23568p OS=Drosophila melanogaster OX=7227 GN=parvin PE=1 SV=2	1.135	0.968	1.172	1.078	1.224	1.044	2.69509e-05	0.576211	4.21072e-06	0.00315888	1.01278e-07	0.0337952	1076.7	1222.4	1042.8	998.6	1.28	3.55	2.78	1.44	1	10	18	10	35	41.8	6.6	0	57.23	1082.9	1095.3	1070.5	1063.9	1222.4	1187.4	1175.5	1264.4	1271.3	1034.9	1032.4	1050.8	1095.5	974.9	1007.9	995.6	1001.5	993.4	1037.8
P10383	Protein ovarian tumor locus OS=Drosophila melanogaster OX=7227 GN=otu PE=2 SV=2	0.75	0.962	0.779	0.976	0.732	0.939	2.74834e-05	0.793674	0.000117207	0.938825	1.18557e-05	0.468514	3072.7	2304.2	2956.9	3149.7	2.2	7.85	4.35	5.85	1	15	35	15	21	97.4	7.06	0	99.323	3131.3	3032.1	2988.8	3113.8	2304.2	2407.7	2203.8	2575.5	2105.7	2902.3	3103.6	2808.2	3012.6	2911.4	3190.4	3353.2	3109.5	2872.5	2873
D6W4U0	Sphingomyelin phosphodiesterase OS=Drosophila melanogaster OX=7227 GN=CG3376-RA PE=1 SV=1	1.208	1.148	1.053	0.89	1.076	1.022	2.76999e-05	0.000995493	0.238796	0.00349079	0.0695256	0.889856	473.5	572.2	543.6	531.8	2.82	1.57	2.52	6.98	1	6	9	6	10	87.1	6.29	0	37.621	456	480.6	466.6	485.1	559.1	577.3	583.4	571.7	572.2	535.6	528.9	558.4	551.8	537.4	490.8	526.2	581.1	418.3	455.3
Q9VSY6	Phosphoserine phosphatase OS=Drosophila melanogaster OX=7227 GN=aay PE=2 SV=1	0.777	0.952	0.817	0.925	0.719	0.88	2.78434e-05	0.75023	0.00013586	0.211173	1.58447e-06	0.0385043	965.2	750.2	918.5	1043.9	3.19	7.37	3.58	6.5	1	8	14	8	36	29.2	6.09	0	32.286	996	948.2	929.2	982.6	750.2	688.7	753.2	795.9	662.4	899.1	968.4	900.3	937.1	1027.2	1134.7	1060.9	971.7	913.7	898.5
Q9VCM8	Uncharacterized protein, isoform A OS=Drosophila melanogaster OX=7227 GN=Dmel\CG4408 PE=1 SV=2	1.19	0.909	1.308	1.058	1.259	0.963	2.79501e-05	0.0187461	3.00637e-07	0.0844747	7.98806e-07	0.834339	2454.6	2920	2232.3	2319.1	3.73	4.62	1.99	3.45	1	16	33	16	43	54.4	6.33	0	95.428	2348.3	2407.4	2550.7	2502.7	2920	2909.2	3020.6	2753.9	3118	2296.4	2215	2249.7	2194.9	2172.5	2317	2321.2	2346.5	2154.3	2281
Q7K5M6	GH04176p OS=Drosophila melanogaster OX=7227 GN=Sip1 PE=1 SV=1	1.228	1.086	1.132	1.075	1.321	1.167	2.8047e-05	0.475395	0.000306481	0.0226768	3.3908e-07	0.0015669	2331.5	2864.2	2531.3	2168.7	4.58	2.91	5.45	1.68	1	13	44	13	51	30.7	9.33	0	119.402	2289.1	2325.1	2530.4	2337.9	2864.2	2764.1	2840.3	2990.4	2908.7	2269.7	2514.2	2548.9	2548.4	2106.9	2168.8	2191.6	2168.5	2099.9	2203.1
Q9VII1	UPAR/Ly6 domain-containing protein bero OS=Drosophila melanogaster OX=7227 GN=bero PE=1 SV=1	1.201	1.097	1.095	1.018	1.222	1.116	2.80637e-05	0.039422	0.00553884	0.765849	6.84837e-06	0.00667808	401.4	482.2	440.4	394.5	5.63	3.81	2.84	1.84	1	2	4	2	15	15.9	7.71	0	9.155	385.3	408.3	394.6	437.8	482.2	476	472.8	497.5	517.9	430.3	452.2	450.7	429.3	396.2	388.3	392.8	405.5	353.5	386.9
Q9V4P1	Anillin OS=Drosophila melanogaster OX=7227 GN=scra PE=1 SV=3	1.267	1.041	1.217	0.951	1.205	0.99	2.86077e-05	0.615997	0.000206597	0.483319	0.000305834	0.995478	1448.6	1835.5	1507.8	1523.2	2.22	5.51	3.03	7.25	1	22	30	22	20	135.9	6.24	0	71.087	1406	1484.2	1451.3	1445.9	1835.5	1918.4	1822.1	1710.5	1978.8	1561.4	1468.7	1539.3	1476.9	1626.8	1426.9	1434.3	1617.5	1289.8	1406.3
Q7PLK0	Protein argonaute-3 OS=Drosophila melanogaster OX=7227 GN=AGO3 PE=1 SV=3	0.775	1.183	0.655	1.071	0.83	1.267	2.90793e-05	0.00446141	1.30767e-07	0.252487	0.000738794	0.000159842	2934.5	2274.1	3471.2	2740.4	1.23	6.72	6.15	2.82	1	26	42	26	37	99.1	8.82	0	131.187	2933.9	2935.2	2981.5	2892.8	2359.6	2104.6	2228.7	2274.1	2519.1	3122.6	3438	3504.8	3611.6	2764.2	2716.8	2830.6	2647.7	2691.4	2781.1
Q9V3P3	LD45860p OS=Drosophila melanogaster OX=7227 GN=REG PE=1 SV=1	0.888	1.024	0.867	1.056	0.937	1.081	2.95587e-05	0.219933	1.72261e-06	0.0288815	0.00822413	0.000738068	5594.4	4967.9	5731.3	5300.1	1.44	1.78	1	3.54	1	13	47	13	45	28.1	6.05	0	61.886	5609	5579.8	5450.6	5629.6	4939	4962.9	5022.4	5160.8	4967.9	5692.2	5762.7	5814.9	5700.1	5101	5508.8	5407.7	5194.6	5145.5	5286.9
Q7JRJ9	Inner centromere protein, isoform A OS=Drosophila melanogaster OX=7227 GN=Incenp PE=1 SV=1	1.115	1.046	1.066	1.037	1.156	1.085	2.96006e-05	0.0587463	0.00387203	0.496399	3.79865e-06	0.00428461	3981.7	4439.4	4165.7	3840	2.33	3.43	1.03	2.01	1	25	48	25	33	83.5	9.28	0	140.72	3823.4	3974.9	4036.6	3988.5	4425.2	4618.9	4439.4	4249.4	4612.2	4171.3	4097.1	4198.4	4160.2	3833.4	3782.8	3846.5	3965.8	3507.5	3766.3
Q9VRD9	Cystathionine beta-synthase OS=Drosophila melanogaster OX=7227 GN=Cbs PE=1 SV=1	1.108	1.182	0.937	0.981	1.087	1.16	2.97055e-05	7.72214e-07	0.0214792	0.356709	0.000489024	6.22911e-06	3879.8	4298.3	4587.7	3955.6	1.43	2.62	1.66	3.19	1	13	42	13	36	56.8	7.06	0	98.195	3795.8	3879	3929.7	3880.6	4290	4225.1	4407	4298.3	4513.8	4671.4	4558.2	4617.4	4495	4008.7	4153.3	3871.2	3903.3	3482.1	3675.4
Q9V452	Chromatin accessibility complex 16kD protein OS=Drosophila melanogaster OX=7227 GN=Chrac-16 PE=1 SV=1	1.334	1.129	1.182	0.908	1.211	1.024	2.97131e-05	0.0280847	0.00852735	0.0718382	0.00313385	0.951405	568	757.6	641.1	625.8	4.4	7.31	2.47	5.23	1	6	10	6	63	16	4.55	0	32.068	547.1	551.5	585	598.3	723.9	757.6	760.7	665.6	813.4	631.9	647.4	666.9	634.8	601.4	631.7	620	678.9	501.9	522.6
Q9VU84	Drebrin-like protein OS=Drosophila melanogaster OX=7227 GN=Abp1 PE=1 SV=1	1.289	1.171	1.101	0.948	1.222	1.11	2.98112e-05	0.00465911	0.0564769	0.421271	0.000391282	0.0812268	692.9	893.5	811.5	731.2	4.39	4.49	2.26	6.47	1	13	27	13	30	58.7	5.02	0	67.316	678.7	675.7	741.7	707.5	861.9	921.9	893.5	821.3	903.5	818.2	778.4	808	815	756.3	693.9	706.9	798.1	622.6	640.2
Q9VEJ2	Nucleolar protein 14 homolog OS=Drosophila melanogaster OX=7227 GN=l(3)07882 PE=2 SV=2	0.871	0.948	0.919	1.015	0.884	0.962	3.03654e-05	0.0582306	0.00403537	0.774714	0.000138606	0.278486	5387.6	4692.1	5106.3	5308.1	2.28	3.04	2.93	2.7	1	28	63	28	37	97.5	6.2	0	147.203	5534.9	5456.2	5266.9	5319.8	4692.1	4718	4560.5	4941.8	4634.5	5036.6	5267.1	4929.5	5176.9	5454.8	5314.2	5302.1	5107.5	5077.5	5169.8
O46050	60S ribosomal export protein NMD3 OS=Drosophila melanogaster OX=7227 GN=Nmd3 PE=1 SV=1	0.805	0.898	0.896	0.993	0.799	0.891	3.06408e-05	0.01064	0.0246753	0.986224	1.85103e-05	0.00576177	3420	2751.4	3070.1	3443.9	3.15	6.06	1.08	1.46	1	17	48	17	43	59.1	6.06	0	115.293	3519.1	3414	3260.3	3426	2751.4	2923.7	2719.1	3098	2690.6	3056.3	3124.5	3052.2	3083.9	3415.9	3371.7	3472	3477.6	3228.2	3234.8
Q9V6K1	Tripeptidyl-peptidase 2 OS=Drosophila melanogaster OX=7227 GN=TppII PE=1 SV=2	1.108	1.146	0.966	0.962	1.066	1.103	3.10519e-05	2.01467e-06	0.0941374	0.0768321	0.00307805	7.83366e-05	23151.2	25647.8	26539.4	24055	0.16	1.67	1.27	3.67	1	60	219	60	48	158.6	7.59	0	394.948	23173	23129.5	23103.5	23183.3	25304.2	25647.8	26191.4	25142.2	25905.6	26267.1	26315.6	26953.4	26765	23179.5	25079.7	24576.5	23544.7	21257.9	21915.5
P91679	Peptide transporter family 1 OS=Drosophila melanogaster OX=7227 GN=yin PE=1 SV=2	0.806	1.799	0.448	0.59	0.475	1.061	3.1079e-05	2.78425e-10	5.36138e-12	1.04223e-09	9.26226e-12	0.193401	1693.6	1364.4	3047	2870.5	2.95	5.3	3.76	3.78	1	15	41	14	22	82.2	6.3	0	100.553	1708	1679.4	1740.3	1622.8	1471.8	1327.9	1428.3	1364.4	1292.6	3122.2	2869.9	3093.3	3001.4	2868.1	2682	2873	2927.5	1566.8	1591.2
Q8MQJ8	Huntingtin interacting protein 1 OS=Drosophila melanogaster OX=7227 GN=Hip1 PE=1 SV=1	1.132	1.05	1.078	0.984	1.114	1.033	3.14892e-05	0.0285989	0.00900309	0.898651	9.31355e-05	0.0972974	2133.8	2415.6	2240.4	2168.7	3	1.65	2.63	3	1	27	40	26	26	128.3	5.72	0	115.524	2029.8	2125.5	2179.2	2142.3	2369.6	2357.5	2429.9	2450.2	2415.6	2264.4	2189	2324	2216.6	2194.8	2052.2	2179.1	2158.3	1862	2013.9
A0A0B4KGE4	alpha-glucosidase OS=Drosophila melanogaster OX=7227 GN=CD98hc PE=1 SV=1	0.874	1.013	0.862	1.081	0.944	1.095	3.15413e-05	0.930022	1.29561e-05	0.0124173	0.0217591	0.00416767	4522.9	3950.9	4582.1	4184.7	1.42	2.88	1.1	4.79	1	20	71	20	43	69.3	5.48	0	149.727	4455.1	4556.3	4597.9	4489.8	3950.9	4023.6	3819.8	4022.2	3782.4	4641.8	4571.3	4519.8	4592.8	4024.7	4382.5	4351	4014.5	4086.9	4317.1
Q9VYG3	Lipid scramblase CLPTM1L OS=Drosophila melanogaster OX=7227 GN=Dmel\CG4332 PE=1 SV=1	1.192	1.013	1.176	1.019	1.215	1.033	3.1545e-05	0.852122	0.00011181	0.783943	7.99355e-06	0.342104	3298.9	3932.7	3343.3	3237	0.91	3.9	2.53	5.32	1	17	34	17	33	64.3	9.13	0	86.03	3307.9	3290	3350.5	3284.1	3882.4	4055.4	4129.7	3733.9	3932.7	3502.3	3327	3359.7	3318.9	3365.8	3113.2	3058.6	3395.6	3034.5	3117.3
Q7KRU8	Ferritin heavy chain OS=Drosophila melanogaster OX=7227 GN=Fer1HCH PE=1 SV=1	1.243	1.297	0.959	0.91	1.131	1.18	3.18632e-05	8.49115e-06	0.521438	0.0643325	0.00384998	0.000562562	3779.7	4697.7	4900.7	4152.8	4.25	5.91	2.57	3.52	1	7	42	7	45	23.1	5.87	0	55.362	3718.5	3671.1	4034.7	3841.8	4697.7	4391.9	5168.1	4700.7	4664.5	4788.9	4958.9	5072.8	4843	4043.6	4302.4	4264.9	4021	3411.2	3478.4
Q9VTE9	Nedd8-activating enzyme E1 regulatory subunit OS=Drosophila melanogaster OX=7227 GN=APP-BP1 PE=1 SV=1	1.074	1.047	1.026	1.017	1.092	1.064	3.18938e-05	0.001488	0.190927	0.375658	2.99363e-06	9.52625e-05	3296.3	3540	3450.6	3241.9	1.32	1.94	1.02	1.13	1	16	42	16	35	58.7	5.33	0	86.52	3244.1	3284.1	3308.6	3348.1	3565.3	3540	3502.2	3449.5	3632.5	3449.6	3451.5	3517.4	3440.6	3264.4	3277.2	3219.5	3200	2976	3111.7
Q9V429	Thioredoxin-2 OS=Drosophila melanogaster OX=7227 GN=Trx-2 PE=1 SV=3	1.133	1.1	1.03	0.914	1.035	1.005	3.21847e-05	9.66324e-05	0.980022	0.000299512	0.67485	0.889695	3742.3	4238.4	4115.5	4095.7	2.2	2.26	2	1.76	1	4	25	4	40	11.7	4.88	0	21.382	3735.9	3715.9	3897.5	3748.6	4238.4	4125.5	4241.2	4034.6	4246.5	4114.8	4116.2	4279.3	4108.8	4211.3	4110.5	4042.5	4081	3427.2	3520.9
Q9VCD3	LP20373p OS=Drosophila melanogaster OX=7227 GN=Dmel\CG13605 PE=2 SV=2	0.672	0.914	0.735	0.996	0.67	0.911	3.22213e-05	0.576125	0.000264866	0.878884	1.08128e-05	0.221734	412.6	277.5	377.3	414.1	6.54	8.65	3.02	7.85	1	7	11	7	13	72	6.74	0	29.407	403.6	421.8	369.3	428.7	276.5	277.3	287.6	335	277.5	381.3	396.4	371	373.4	388.9	408.1	466.6	420.2	370.3	399.7
Q9I7X6	Carnosine N-methyltransferase OS=Drosophila melanogaster OX=7227 GN=CG11596 PE=1 SV=1	0.875	1.077	0.813	0.981	0.859	1.056	3.23567e-05	0.00242037	9.82697e-08	0.760234	7.69119e-06	0.0143826	1516.7	1327.8	1633.3	1546.5	0.8	3.48	2.31	1.79	1	14	31	14	34	50.5	5.15	0	70.832	1526.7	1498.5	1520.5	1513	1346.5	1327.8	1324.4	1313.8	1429.6	1682.2	1601.1	1611.6	1655.3	1562.9	1504.9	1561.3	1531.8	1400.5	1419.8
Q95ST2	Protein wntless OS=Drosophila melanogaster OX=7227 GN=wls PE=1 SV=1	1.589	1.118	1.42	0.969	1.539	1.084	3.24166e-05	0.460834	0.000378459	0.999962	3.47908e-05	0.486311	850.4	1350.9	951.2	877.6	4.43	9.4	4.03	12.27	1	7	12	7	13	67.8	6.68	0	33.818	850.8	846	925.8	850	1279.3	1350.9	1418.3	1125.7	1427.8	956.3	946	996.8	903.6	975.3	804.3	762.5	957.6	780.5	801.6
P16620	Tyrosine-protein phosphatase 69D OS=Drosophila melanogaster OX=7227 GN=Ptp69D PE=1 SV=2	1.308	0.987	1.324	1.041	1.362	1.028	3.24701e-05	0.612811	5.41193e-06	0.280058	2.29837e-06	0.915376	1283.6	1678.6	1267.5	1232.8	6.41	5.77	4.02	3.39	1	19	31	19	16	167.4	6.58	0	62.76	1291.1	1249.7	1437.2	1276.1	1678.6	1627.8	1733.2	1559.2	1812.5	1241.2	1294.2	1189.7	1295.7	1216.9	1267.2	1248.8	1172.3	1184.4	1184.1
Q9VR91	Probable E3 ubiquitin-protein ligase HERC2 OS=Drosophila melanogaster OX=7227 GN=HERC2 PE=1 SV=3	1.09	1.008	1.081	0.97	1.058	0.978	3.26452e-05	0.628548	0.000230838	0.17372	0.0013198	0.758937	3361.4	3664	3388.9	3464.3	0.97	1.3	2.48	1.8	1	65	81	65	16	529.7	6.87	0	197.915	3329	3369.5	3353.3	3407	3630.1	3695	3586.9	3701.4	3664	3535.6	3408.3	3369.6	3345.8	3498.5	3379.2	3430.3	3512.6	3053.9	3192.6
Q95R98	Protein phosphatase methylesterase 1 OS=Drosophila melanogaster OX=7227 GN=Dmel\CG5068 PE=1 SV=1	0.866	0.84	1.031	1.18	1.022	0.991	3.2697e-05	4.29017e-06	0.248601	2.07165e-05	0.883111	0.652209	3344.4	2897	2809.3	2834.3	2.71	1.76	2.81	3.76	1	10	30	10	24	45.3	6.25	0	48.942	3396.3	3366.4	3192.4	3322.5	2897	2861.7	2929.7	2964.6	2837.3	2872	2800.3	2818.3	2685.7	3012.5	2835.2	2759	2833.4	3115.6	3189.7
Q9VVU2	Large ribosomal subunit protein uL24 OS=Drosophila melanogaster OX=7227 GN=RpL26 PE=1 SV=1	0.879	0.985	0.893	1.04	0.914	1.024	3.29639e-05	0.690802	0.000194858	0.170784	0.00136184	0.692918	10018.5	8804.3	9864	9629	2.13	3.15	1.86	1.88	1	11	80	11	53	17.3	10.95	0	82.035	10268.2	10030.1	9746.6	10007	8804.3	8966.1	8758.6	9388.6	8684.1	9598.3	9966	9763	9984.3	9640.1	9618	9885.5	9445.6	9419.6	9503.6
Q9VQG1	LD12265p OS=Drosophila melanogaster OX=7227 GN=Snx21 PE=1 SV=2	1.258	1.138	1.105	0.994	1.25	1.131	3.30631e-05	0.00384283	0.0780714	0.995796	4.67396e-05	0.00576438	904.6	1138	1029.5	910.2	3.06	6.5	2.09	3.69	1	8	12	8	29	37.2	6.47	0	47.503	912.7	938.6	896.6	872.7	1162.1	1025.2	1138	1214.1	1081	1033.9	1025.1	1019.5	1067.9	914	906.4	872.1	954.1	837.3	889.3
Q6NN85	Protein phosphatase Slingshot OS=Drosophila melanogaster OX=7227 GN=ssh PE=1 SV=2	1.237	0.973	1.271	0.926	1.146	0.901	3.33055e-05	0.502041	4.27137e-06	0.135434	0.00179577	0.0105771	863.7	1068.1	840.1	932.4	6.1	3.91	1.29	1.96	1	18	28	18	19	114.9	8.66	0	68.085	855	872.5	949.1	823.4	1026.9	1068.1	1072.6	993.8	1097.5	853.1	846.8	833.4	830.3	950.7	908.4	925.7	939.1	784.3	826.7
E1JJE6	Otopetrin-like a, isoform C OS=Drosophila melanogaster OX=7227 GN=OtopLa PE=1 SV=1	2.751	0.919	2.993	1.095	3.012	1.006	3.34082e-05	0.951473	1.52678e-05	0.991411	5.20224e-05	0.847912	63.4	174.4	58.3	57.9	9.86	19.19	3.47	40.06	1	3	4	3	3	108.8	7.9	0	8.715	71.6	65.1	56.6	61.8	204.7	174.4	150.1	140.3	219.6	57.7	58.9	61.7	57.1	110.8	51.9	52	64.4	65.7	61.7
Q8MLT4	Gp150, isoform D OS=Drosophila melanogaster OX=7227 GN=Gp150 PE=1 SV=1	0.904	0.961	0.941	1.002	0.905	0.963	3.34387e-05	0.0437918	0.00617472	0.922485	8.90748e-05	0.129247	1823.4	1648.5	1752.5	1820.6	1.22	2.24	1.95	2.96	1	21	33	21	19	120.9	5.02	0	74.683	1821.6	1819.3	1866.3	1825.2	1648.5	1640.4	1597.4	1650.9	1701.3	1748.5	1756.5	1788.3	1705.4	1816	1876.6	1825.2	1745.9	1671	1723.8
Q8SYP8	RE47911p OS=Drosophila melanogaster OX=7227 GN=Spt PE=2 SV=1	1.309	1.012	1.293	0.997	1.305	1.009	3.44858e-05	0.875057	0.000112923	0.90546	9.95949e-05	0.999827	248.3	325.1	251.3	249.1	5.61	5.91	4.93	7.85	1	3	3	3	6	66.9	5.92	0	4.264	228.4	259.2	254.6	242.1	317.7	325.1	350.4	309.9	353.3	270.1	258	243.5	244.9	279.2	239.1	236.7	259.5	209.5	245.6
P50882	Large ribosomal subunit protein uL6 OS=Drosophila melanogaster OX=7227 GN=RpL9 PE=1 SV=2	0.904	0.961	0.94	0.994	0.899	0.956	3.45769e-05	0.0898076	0.00296549	0.699192	7.02186e-06	0.0125881	9656.5	8728.5	9281.7	9711.4	1.87	2.14	1.3	2.36	1	12	110	12	70	21.4	9.69	0	107.366	9628.3	9827.9	9395.2	9684.8	8728.5	8691.7	8568.3	9072.4	8734	9178.5	9363.7	9200.5	9424.5	9647.5	9595.9	10109.8	9775.7	8832.6	9312.1
Q7K274	LD15586p OS=Drosophila melanogaster OX=7227 GN=l(2)k09913 PE=1 SV=1	0.828	0.995	0.832	0.956	0.791	0.951	3.46166e-05	0.998845	4.33001e-05	0.421141	3.62043e-06	0.349282	809.7	670.7	806	847.4	2.98	5.35	4.79	2.42	1	9	16	9	30	44.1	9.5	0	46.506	778.1	819.1	800.5	833.8	670.7	699	630.3	681.5	615.4	798.4	757.1	850.2	813.6	836.5	823.3	858.4	868.4	713.8	776.1
Q9VAQ5	Probable dimethyladenosine transferase OS=Drosophila melanogaster OX=7227 GN=CG11837 PE=2 SV=1	0.842	0.999	0.842	1.005	0.846	1.004	3.46489e-05	0.988686	5.64673e-05	0.931845	8.82139e-05	0.991962	5063.3	4261.1	5059.3	5039.3	2.07	5.43	2.94	3.2	1	17	43	17	54	35	9.67	0	79.254	5202.4	5134.4	4992.3	4993.2	4261.1	4043	3994	4571	4290.7	4852.4	5128.8	4990.9	5183	4994.5	5146.5	5084.6	4780.1	4772.5	4864.9
A1ZBU8	Uncharacterized protein, isoform A OS=Drosophila melanogaster OX=7227 GN=Bbd PE=1 SV=1	0.492	0.399	1.234	2.569	1.265	1.025	3.47325e-05	3.37918e-06	0.171864	1.60722e-06	0.0583083	0.928273	4112.6	2024.8	1640.6	1600.7	9.42	15.13	3.63	20.22	1	9	24	9	34	26.2	5.29	0	41.284	3507.9	4184.3	4042.1	4399.6	1627.2	2024.8	2494.2	2097.3	1984.3	1656.2	1625.1	1720.7	1578.1	1903	1176.7	1473.4	1738.9	3218	3964.7
Q9VBU9	40S ribosomal protein S27 OS=Drosophila melanogaster OX=7227 GN=RpS27 PE=1 SV=1	0.912	0.935	0.976	1.026	0.936	0.96	3.48531e-05	0.00152574	0.205092	0.0587644	0.0047451	0.228665	2312.8	2110	2162.5	2253.7	0.85	1.82	1.88	2.94	1	3	24	3	38	9.4	9.52	0	23.103	2341.5	2305.6	2296.3	2320	2141.1	2110	2053.4	2068.5	2129.6	2109.8	2165.6	2159.4	2208.7	2126.7	2254.9	2252.5	2264.2	2148	2184.6
Q9VIX7	Fondue, isoform B OS=Drosophila melanogaster OX=7227 GN=fon PE=1 SV=1	0.809	0.695	1.164	1.312	1.062	0.913	3.5089e-05	1.89067e-07	0.00148108	6.99118e-06	0.401516	0.0373244	2242	1814.5	1559.2	1708.4	5.17	5.45	2.45	4.89	1	10	38	10	23	58	6.96	0	78.104	2150.6	2296.6	2188.6	2410.6	1694	1814.5	1850.1	1931.8	1715.1	1565.2	1486	1562.1	1556.3	1812.7	1613.6	1684.7	1732.4	1972.9	2176.1
Q9VA91	Small ribosomal subunit protein eS7 OS=Drosophila melanogaster OX=7227 GN=RpS7 PE=1 SV=1	0.834	0.939	0.888	1.041	0.868	0.978	3.51113e-05	0.0300574	0.00979714	0.234584	0.00100966	0.631745	11624.5	9691.2	10917.3	11168.1	3.06	4	4.84	3.18	1	16	94	16	73	22.2	9.8	0	85.379	12330.6	11658.2	11590.9	11588.3	9691.2	9984.5	9506.9	10367.5	9399.6	11168.7	11269.5	10130.1	10671.6	11362.8	11550.7	10976.8	10772.8	11311.6	11046.3
A1ZAY5	tRNA N(3)-methylcytidine methyltransferase OS=Drosophila melanogaster OX=7227 GN=Dmel\CG34195 PE=2 SV=2	0.822	0.929	0.884	1.053	0.865	0.978	3.54804e-05	0.0600742	0.00473766	0.441483	0.000446699	0.585872	713	586	662.5	677.2	2.15	4.31	2.52	5.84	1	5	7	5	18	33.2	6.33	0	15.066	697.1	731.7	705.9	720.3	586	625.2	556.1	578.4	597	665.1	674.7	659.9	635.8	696.3	734.7	646.4	658.6	639.5	693.3
Q9VYQ5	Probable cytochrome P450 318a1 OS=Drosophila melanogaster OX=7227 GN=Cyp318a1 PE=2 SV=4	1.296	1.029	1.259	0.936	1.214	0.964	3.56431e-05	0.959105	7.72402e-05	0.520577	0.000350052	0.801489	115.2	149.3	118.5	123	7.07	5.28	3.27	4.72	1	5	6	5	10	61.7	8.76	0	15.871	110.4	129.2	113.3	117.2	144.8	142.4	159.9	158.8	149.3	119.5	116	117.6	124.9	120.6	130.8	117.5	125.5	101.2	122.5
A1ZAX1	Eukaryotic translation initiation factor 3 subunit C OS=Drosophila melanogaster OX=7227 GN=eIF3c PE=1 SV=1	0.917	0.982	0.934	0.977	0.895	0.959	3.58638e-05	0.391898	0.000535283	0.228892	2.09435e-06	0.0133199	20653	18935	20279.3	21147.5	2.41	1.74	1.59	1.43	1	45	178	45	46	105.6	6.06	0	282.909	21397.3	20660.9	20188.4	20645.1	18935	19223.6	18609	19390.9	18722.9	20641.8	20470.6	20089.8	19950.1	21716.4	21054.6	21187.3	21107.8	19629	19576.5
Q9W2H8	Glycogen debranching enzyme OS=Drosophila melanogaster OX=7227 GN=BEST:GH22856 PE=1 SV=3	1.177	1.124	1.047	0.796	0.936	0.894	3.61828e-05	0.000669586	0.429723	1.63463e-06	0.056956	0.00501513	3370.9	3967.3	3789.8	4237	4.38	3.55	2.46	2.68	1	35	63	35	25	183.1	6.54	0	165.517	3202.6	3444.7	3533.5	3298.6	3967.3	3949.5	4107.5	3745.3	4068.4	3967.5	3800.7	3764.7	3778.9	4090.1	4233.6	4240.4	4367.3	2937.9	3263.9
Q9V415	HMG-coA reductase degradation 3, isoform A OS=Drosophila melanogaster OX=7227 GN=Hrd3 PE=1 SV=1	0.858	0.895	0.959	0.993	0.852	0.889	3.64067e-05	0.00140028	0.232272	0.60355	5.86761e-06	0.000172355	2515	2158.7	2251.2	2532.6	4.07	2.86	1.55	1.5	1	17	30	17	21	89.3	5.6	0	74.429	2561.1	2558	2345.5	2472.6	2144.1	2258.1	2158.7	2218.3	2101.1	2300.4	2271.4	2231.2	2227.1	2541.7	2598.5	2523.5	2512.9	2349.4	2423.8
Q8T0N5	GH17516p OS=Drosophila melanogaster OX=7227 GN=Dmel\CG8768 PE=1 SV=1	0.898	1.007	0.891	1.312	1.177	1.321	3.66416e-05	0.965998	7.55878e-05	1.62959e-08	1.97858e-05	2.46459e-08	681.2	611.4	686.1	519.3	3.75	3.04	1.1	2.91	1	7	10	7	29	32.8	9.35	0	28.309	674.1	729	688.1	674.2	594.4	611.4	572.5	614.3	615	681.7	675.2	690.9	690.4	525.1	513.5	501.3	536.4	618.4	690.7
A0A0B4JD97	Transforming acidic coiled-coil protein, isoform K OS=Drosophila melanogaster OX=7227 GN=tacc PE=1 SV=1	1.185	1.116	1.062	0.918	1.088	1.024	3.66811e-05	0.00371345	0.0914448	0.0159427	0.0202301	0.852484	9980	11822.2	11135.6	10870.9	3.26	4.76	2.11	3.48	1	50	142	50	48	147.1	4.98	0	330.409	9548.9	9785.6	10224.6	10178.2	11791	11822.2	12195.2	10999	12502.8	11331	10882.7	11316	10958	11084.5	10508	10661.5	11331.9	8759.8	9272
B7Z0D7	Senataxin, isoform B OS=Drosophila melanogaster OX=7227 GN=Setx PE=4 SV=1	1.239	0.921	1.345	1.193	1.478	1.098	3.68246e-05	0.0410629	6.09152e-07	0.000828217	5.70209e-08	0.180675	1059.9	1313.4	976.2	888.7	4.94	0.77	5.88	4.9	1	11	16	11	7	190.9	8.84	0	23.365	1097.8	1006.1	1110.4	1023.2	1299.4	1321	1297.8	1313.4	1314.4	951.8	1001.2	888.9	1013.6	962.5	897.2	880.3	860.9	1007.1	953.3
Q86BR8	Mitochondrial transcription factor A, isoform B OS=Drosophila melanogaster OX=7227 GN=TFAM PE=1 SV=1	1.149	1.028	1.117	0.99	1.137	1.018	3.6852e-05	0.728511	0.000197073	0.991863	5.70578e-05	0.8703	6632.7	7622.5	6821.3	6702.9	2.99	3.73	2.44	3.35	1	17	49	17	47	33	9.96	0	90.678	6744	6523.3	6879.9	6448.7	7885.2	7622.5	7520.8	7553.3	8207.1	6620.8	6712.4	6961	6932	6471.6	6885.3	6884.9	6525.8	6186.6	6180.9
Q9VXA8	Decapping and exoribonuclease protein Rai1 OS=Drosophila melanogaster OX=7227 GN=Rai1 PE=1 SV=1	1.241	1.034	1.2	1.204	1.494	1.245	3.71226e-05	0.892333	0.000113957	0.000581025	4.64883e-08	0.000182614	305.6	379.1	315.9	253.8	2.82	2.23	2.99	8.26	1	3	5	3	10	42.9	8.4	0	13.794	295.7	312.6	299.4	311.8	376.4	386.3	379.1	369.3	391	317.9	298.2	317.9	314	281.4	235	242.9	265.2	271.3	296.2
Q7JXU4	Nucleolar GTP-binding protein 2 OS=Drosophila melanogaster OX=7227 GN=Ns2 PE=1 SV=1	0.768	0.961	0.799	1.019	0.783	0.98	3.74539e-05	0.909688	0.000106672	0.946413	8.8268e-05	0.999399	5688.7	4368.9	5467.6	5581.4	4.84	6.65	4.39	4.65	1	32	65	32	52	76.6	9.58	0	161.65	5920.5	5813.5	5306.9	5566.6	4433.7	4271.5	3998.1	4801.7	4368.9	5316.6	5800.6	5306.7	5622.8	5472.7	5692.1	5779.1	5202.4	5431.2	5508.4
O61345	Protein penguin OS=Drosophila melanogaster OX=7227 GN=peng PE=2 SV=1	0.763	0.976	0.782	0.974	0.743	0.951	3.76245e-05	0.908264	0.000107881	0.96331	1.84127e-05	0.672525	10164.5	7757.8	9922.6	10436.2	5.26	6.96	3.81	4.71	1	33	80	33	49	81.3	8.94	0	190.113	10942.4	10291.8	9662.9	10038.8	7921.3	7694.2	7349.4	8819.1	7757.8	9825.3	10473.4	9575.4	10020.8	10216.6	10955.3	10660.4	9840.7	10038.1	9751.6
Q9VHG8	Uncharacterized protein OS=Drosophila melanogaster OX=7227 GN=Dmel\CG16734 PE=4 SV=2	0.883	1.04	0.849	1.071	0.946	1.114	3.77176e-05	0.127231	1.36679e-06	0.00452754	0.0773491	8.2277e-05	402.1	355	418	375.4	1.15	1.29	2.22	4.39	1	5	7	5	13	51	5.36	0	23.656	404.7	405.7	395.9	399.4	355	360	353.1	348.4	358.4	431.5	409.5	415.3	420.6	349.4	378.4	372.3	387.7	371.3	384.4
Q9W3Y3	Calcyclin-binding protein OS=Drosophila melanogaster OX=7227 GN=Dmel\CG3226 PE=1 SV=1	1.089	1.078	1.011	0.952	1.037	1.026	3.77963e-05	0.000240038	0.814382	0.0180759	0.0184017	0.111805	4560.2	4968.4	4914.6	4791.1	1.51	1.46	2.39	2.06	1	13	47	13	60	25.8	6.96	0	80.921	4528	4472.7	4592.7	4628	4960.2	4968.4	5078.1	4884.7	5026.3	5067.3	4820.1	4986.2	4844.1	4865.9	4809.4	4635.4	4772.9	4153.8	4237.9
Q9V576	Putative phosphatidate phosphatase OS=Drosophila melanogaster OX=7227 GN=wun PE=1 SV=2	0.861	0.92	0.935	1.245	1.072	1.146	3.80571e-05	0.0111515	0.0308215	3.98971e-07	0.00502665	4.71103e-05	430.8	370.8	396.5	346	1.61	2.87	2.94	3.84	1	5	7	5	16	42.8	8.32	0	16.442	427.6	439.6	434.1	423.9	370.8	370.4	361.9	388.8	382.9	392.7	415.2	388.6	400.2	331.2	355.1	358.3	337.2	392.2	416.5
Q7K3V6	AT01345p OS=Drosophila melanogaster OX=7227 GN=mEFTu2 PE=1 SV=1	1.082	1.076	1.006	0.939	1.017	1.011	3.87292e-05	0.000104824	0.989029	0.00050704	0.552671	0.762795	1662.7	1799.6	1788.5	1769.8	3.29	0.86	1.04	1.94	1	10	27	10	28	49.6	7.69	0	57.39	1557.4	1665.9	1669.2	1659.5	1799.6	1795.4	1782.9	1800.2	1825.6	1779	1798	1778.5	1817.7	1726.3	1767.5	1772.1	1810.1	1428.7	1578.4
Q7K4G8	LD40944p OS=Drosophila melanogaster OX=7227 GN=anon-WO0140519.201 PE=1 SV=1	1.119	1.158	0.966	0.952	1.065	1.103	3.87995e-05	6.17717e-06	0.321411	0.0479623	0.00674502	0.000495706	871.9	975.4	1009.8	915.5	0.7	1.84	2.14	4.02	1	14	25	14	24	66.4	4.81	0	69.224	872.7	875.7	871.1	861.6	988.7	967.3	957.7	975.4	1003.5	981.7	998.6	1029.1	1021.2	946.7	949.8	885.2	883.7	800.6	829.8
Q9U4L6	Mitochondrial import receptor subunit TOM40 homolog 1 OS=Drosophila melanogaster OX=7227 GN=Tom40 PE=2 SV=2	0.872	1.016	0.858	1.024	0.892	1.04	3.89632e-05	0.99912	3.17977e-05	0.344291	0.000702148	0.286514	4641.5	4045.9	4715	4534.8	1.97	2.37	3.81	2.36	1	10	37	10	38	36.3	7.09	0	71.51	4678.5	4604.8	4774.3	4565.3	4132.6	4025.3	4045.9	3999.3	4236.4	4706.7	4832.1	4416	4723.2	4529.1	4594.2	4540.5	4349.5	4291.8	4363.1
Q9VGI4	LD17393p OS=Drosophila melanogaster OX=7227 GN=Lk6 PE=1 SV=1	0.776	0.897	0.865	0.972	0.755	0.872	3.90249e-05	0.0735503	0.00428096	0.311736	2.96645e-06	0.00278829	1879.9	1458.7	1685.5	1933.3	4.1	4.94	3.65	6.95	1	27	43	27	31	128.4	5.29	0	127.217	1856.8	1903.2	1774.1	1955.3	1458.7	1441.3	1394.2	1588.7	1495	1680.1	1790.1	1645.4	1690.9	1918.4	1928.7	2205.5	1938	1703.4	1803.3
Q9VXN1	LD03728p OS=Drosophila melanogaster OX=7227 GN=UBL3 PE=2 SV=1	1.311	1.061	1.236	0.844	1.107	0.896	3.90356e-05	0.404723	0.000564185	0.00117881	0.29015	0.021446	247.5	324.5	262.6	293.2	3.59	3.9	7.14	8.89	1	2	4	2	6	38	9.09	0	7.357	245.1	250.1	232.9	252.8	310.9	340.7	321.7	324.5	340.2	286.1	240.9	258.3	267	290.9	295.6	286.7	344.7	224.8	236.9
Q9VQQ0	Serine/threonine-protein phosphatase 2A activator OS=Drosophila melanogaster OX=7227 GN=Ptpa PE=1 SV=1	1.225	1.162	1.054	0.901	1.104	1.048	3.92445e-05	0.000342389	0.70384	0.0388657	0.00856778	0.079028	1747.8	2141.1	2031.6	1938.8	2.3	3.94	3.73	4.65	1	15	33	15	45	44.2	5.9	0	74.883	1716.5	1812.4	1743.6	1752	2141.1	2031	2166.1	2006.7	2191.3	2148.6	1985.8	2071	1993	1970.8	1907.3	1783.1	1972.1	1574.7	1717.2
Q9W0B6	LD14179p OS=Drosophila melanogaster OX=7227 GN=Dmel\CG17249 PE=1 SV=1	1.223	0.911	1.343	0.991	1.212	0.902	3.94262e-05	0.0663708	8.87168e-07	0.99945	4.69995e-05	0.0543241	664	812.3	604.9	670.3	3.2	3.68	1.29	7.75	1	12	18	12	30	51.5	5.88	0	59.129	676.2	641.7	687.8	652	799.7	836.9	810.4	812.3	875.7	602.6	607.2	601.1	618.4	723.8	607.2	646.2	695.4	620.3	608.1
Q03043	cGMP-dependent protein kinase, isozyme 2 forms cD4/T1/T3A/T3B OS=Drosophila melanogaster OX=7227 GN=for PE=1 SV=3	1.177	0.975	1.207	0.971	1.143	0.947	3.94486e-05	0.829036	1.11467e-05	0.61905	0.000292964	0.209388	5056.7	5950.1	4929	5206.8	2.22	4.3	1.08	4.91	1	29	58	28	25	121.3	6.24	0	112.136	5002	5112	5154.1	4906.1	5950.1	5769.1	6066.5	5740.7	6372.4	4999.3	4896.5	4961.7	4888.1	5455.8	5028.8	4945.3	5391	4588.6	4843.7
P21187	Polyadenylate-binding protein OS=Drosophila melanogaster OX=7227 GN=pAbp PE=1 SV=3	0.888	0.964	0.921	0.994	0.882	0.958	3.96141e-05	0.210622	0.00132636	0.973497	2.08849e-05	0.106235	14640.3	12995.4	14113.2	14727.3	1.66	2.29	4.21	1.46	1	33	194	33	59	69.9	9.31	0	270.375	14721.2	14828.1	14559.7	14271.6	13181	12995.4	12500.9	12618	13059.3	13304.3	14343.5	13886.6	14666.6	14607.1	14460.2	14924	14848.5	13504.6	14049.8
Q9W2I0	Uncharacterized protein, isoform P OS=Drosophila melanogaster OX=7227 GN=Arms PE=1 SV=5	0.907	0.918	0.988	1.027	0.931	0.943	3.96852e-05	0.000535834	0.542191	0.277992	0.000945878	0.0153	2171.9	1968.8	1993.3	2114	1.61	2.6	0.6	2.5	1	27	31	27	19	181.5	7.93	0	116.942	2187.1	2190.1	2115.2	2156.7	1968.8	1919.5	1897.8	1988.9	2023.2	1986.8	1987.2	2012.1	1999.3	2036	2139.3	2088.9	2151.1	2006.4	2075.1
P49905	Transcription initiation factor TFIID subunit 12 OS=Drosophila melanogaster OX=7227 GN=Taf12 PE=1 SV=1	1.209	0.857	1.411	0.942	1.139	0.807	3.98145e-05	0.00655139	2.05221e-07	0.117364	0.00261986	0.000104465	195.9	236.9	167.9	208	6.18	3.08	1.73	4.99	1	1	2	1	4	21.5	7.12	0.002	2.973	197.3	195.9	195.9	172.9	222.7	236.9	239.5	240.5	232.9	164.5	169	166.8	171.2	211.4	191.1	204.6	214.1	181	185.6
Q9VN44	FI07923p OS=Drosophila melanogaster OX=7227 GN=Karybeta3 PE=1 SV=1	0.935	0.929	1.006	0.99	0.925	0.92	4.0117e-05	3.36448e-05	0.954466	0.990869	2.56976e-05	2.21391e-05	13093.7	12237.8	12163.7	13223.2	1.65	1.16	0.95	1.95	1	40	186	40	46	123.5	4.73	0	274.211	13359.6	12927.3	12946.2	13243	12329.3	12405.5	12049	12237.8	12147.1	12159.3	12321.4	12168	12039.9	12797.6	13183.9	13392.8	13262.7	12255.5	12248.8
Q9VZP5	Eukaryotic translation initiation factor 5B OS=Drosophila melanogaster OX=7227 GN=eIF5B PE=1 SV=2	0.906	1.008	0.899	0.995	0.901	1.002	4.03573e-05	0.640256	7.01505e-06	0.543761	5.58869e-06	0.998317	12169.6	11019.8	12261	12236.9	3.18	1.61	0.88	1.64	1	52	159	52	51	127.1	5.52	0	321.607	12229.2	12110.3	11496.7	12362.4	11019.8	11140.4	10843.2	11044.2	10699.6	12187.9	12348.2	12130.8	12334.5	12113	12352.7	12531.3	12122.2	11218.6	11474.7
Q9VGT3	GM04645p OS=Drosophila melanogaster OX=7227 GN=Ugt302C1 PE=1 SV=1	1.191	1.09	1.093	0.921	1.097	1.003	4.04276e-05	0.0164747	0.0220687	0.0260032	0.0136319	0.994229	2129.8	2537.2	2321.5	2313.5	2.69	3.66	1.26	4.56	1	16	28	16	34	60.1	9.19	0	76.052	2136.6	2080.8	2123	2218.3	2461.6	2607.3	2561.1	2374	2537.2	2359.3	2297.3	2338.7	2304.4	2421.3	2382.7	2201.6	2246.4	1960	1971.6
Q9V414	LD36341p OS=Drosophila melanogaster OX=7227 GN=Smg5 PE=1 SV=1	0.855	0.947	0.903	1.017	0.869	0.963	4.08436e-05	0.173729	0.0017267	0.967787	8.34527e-05	0.339298	1934.8	1654.8	1832.1	1903.4	3.25	3.72	1.01	2.95	1	27	42	27	23	135.2	7.43	0	102.121	1965.9	1978.9	1843	1904.2	1737.7	1654.8	1618.3	1725.3	1600.4	1828.8	1815.5	1859.7	1835.4	1935.2	1844.3	1872	1966.5	1803.5	1875
Q7JW60	LD46263p OS=Drosophila melanogaster OX=7227 GN=Dmel\CG12942 PE=2 SV=1	1.157	1.013	1.143	1.062	1.229	1.075	4.08554e-05	0.917805	0.000112617	0.0963989	1.1878e-06	0.0311804	728.7	843.3	738	686.4	1.77	1.47	1.95	5.55	1	10	11	10	16	78.8	6.44	0	36.881	714.8	730.1	746.2	727.3	858.2	836.6	828	843.3	854.4	726.8	728.4	747.7	756.1	664.3	654.6	709.1	736.3	655.7	691.8
P00967	Trifunctional purine biosynthetic protein adenosine-3 OS=Drosophila melanogaster OX=7227 GN=Gart PE=1 SV=2	0.925	0.998	0.927	0.917	0.848	0.915	4.08633e-05	0.988965	6.66243e-05	7.62006e-06	3.56573e-09	5.06854e-06	14193.8	13132.8	14168.4	15485	0.4	1.6	0.63	2.42	1	49	112	49	38	144.4	7.37	0	259.61	14186.1	14201.5	14283.5	14147.6	13101.2	13044.2	13132.8	13571.9	13265.7	14182.3	14154.4	14040.4	14254.2	15228.1	15746.3	15176.3	15931.4	13013.8	13456.1
P49028	Protein mago nashi OS=Drosophila melanogaster OX=7227 GN=mago PE=1 SV=1	0.651	1.067	0.61	0.932	0.606	0.994	4.10798e-05	0.316504	3.14416e-06	0.589222	6.32013e-06	0.953275	1143.8	744.3	1219.9	1227.8	10.87	9.24	5.69	5.05	1	3	9	3	20	17.3	6.11	0	21.037	1080	1235	972.5	1211.4	792.5	692	744.3	864.7	706.8	1189.7	1235.1	1346.3	1204.8	1121.3	1250.3	1250.7	1205.8	990.8	1170.2
M9PF47	Forkhead box K, isoform N OS=Drosophila melanogaster OX=7227 GN=FoxK PE=1 SV=1	0.804	0.943	0.853	1.098	0.882	1.035	4.12739e-05	0.366004	0.00069131	0.0386162	0.0091862	0.528491	1546.9	1243.7	1458.2	1409.3	4.99	6.53	2.42	1.77	1	13	24	13	21	82.2	8.59	0	41.109	1650	1594	1501.1	1486.1	1303	1162.3	1243.7	1197.7	1366.9	1452.9	1460.5	1527.5	1455.8	1433.1	1429.5	1389.3	1386.9	1513.6	1510.4
B9A0M7	AT31036p OS=Drosophila melanogaster OX=7227 GN=BcDNA:LD21969 PE=1 SV=1	1.204	1.12	1.075	1.085	1.306	1.215	4.21584e-05	0.0075786	0.0522017	0.0227315	4.60883e-07	2.95063e-05	789.5	950.5	884	727.6	5.57	3.78	3.19	3.09	1	5	6	5	9	62.9	8.47	0	13.775	753.7	763.8	847.7	816.1	936.8	936	957.8	950.5	1023.9	868.3	900	923.7	863.5	740.7	714.9	740.4	694.4	691.4	723.7
Q95RY2	LD01461p OS=Drosophila melanogaster OX=7227 GN=CG17014 PE=1 SV=1	0.881	1.002	0.88	0.938	0.827	0.94	4.22512e-05	0.749953	9.56268e-06	0.00771272	2.36309e-07	0.0478746	1287.9	1135.1	1290.1	1373.1	3.19	1.71	2.6	2.75	1	8	16	8	40	29.3	5.62	0	43.798	1224.4	1285.6	1290.2	1322.2	1135.1	1128.7	1148.8	1102.8	1150.9	1354	1294.7	1281.4	1285.6	1332.2	1373.8	1424.6	1372.4	1123.2	1218.1
P02516	Heat shock protein 23 OS=Drosophila melanogaster OX=7227 GN=Hsp23 PE=2 SV=2	1.252	0.965	1.298	1.1	1.378	1.062	4.23096e-05	0.622749	7.02241e-06	0.0541371	8.15578e-07	0.379161	2413.8	3022.1	2328.7	2193.4	4.17	5.86	1.37	4.88	1	12	38	12	69	20.6	5.85	0	81.978	2330	2351.7	2477.5	2541.6	2855.6	3022.1	3269.7	2832.8	3044.6	2368.9	2299	2311.7	2345.8	2110.1	2354.9	2151.7	2235.9	2137.5	2228.3
Q9V7Y2	Sphingosine-1-phosphate lyase OS=Drosophila melanogaster OX=7227 GN=Sply PE=1 SV=1	1.121	1.079	1.039	0.966	1.083	1.043	4.23705e-05	0.00516595	0.0776873	0.399417	0.000631505	0.0964156	3547.2	3976.3	3827.8	3670.5	2.69	2.35	2.42	2.4	1	18	40	18	38	60.3	8.46	0	79.314	3556	3538.6	3723.7	3510.4	3947.6	3952.7	4166.4	4072.3	3976.3	3766.1	3855.8	3978.3	3800.1	3590.5	3665.3	3675.7	3803.5	3262.1	3352.8
Q9VI15	GH12023p OS=Drosophila melanogaster OX=7227 GN=Dmel\CG10286 PE=1 SV=1	0.852	0.959	0.888	1.019	0.868	0.978	4.27452e-05	0.277831	0.0010327	0.602939	0.000335878	0.919225	2605.7	2220.5	2499.6	2557.2	1.56	5.79	1.18	3.8	1	11	34	11	20	69.1	4.83	0	62.94	2685.1	2602.6	2608.9	2599.8	2157.2	2220.5	1986	2324.8	2237.6	2492.6	2516.5	2506.7	2449.6	2628.5	2573.1	2541.4	2402.2	2463.2	2466
Q9NDJ2	Helicase domino OS=Drosophila melanogaster OX=7227 GN=dom PE=1 SV=2	1.089	0.976	1.116	0.944	1.028	0.922	4.27643e-05	0.247255	2.59525e-06	0.00180687	0.217489	7.13741e-05	2930.9	3191.7	2860.8	3103.4	1.9	2.12	1.01	2.38	1	41	57	41	15	350	8.94	0	159.101	2896.6	2991.2	2873.8	2965.5	3149.1	3318.6	3240.4	3191.7	3167	2875.1	2815.8	2846.6	2877.4	3238.5	3071	3106.9	3099.9	2657.2	2834.2
Q9VSD6	D-Importin 7/RanBP7 OS=Drosophila melanogaster OX=7227 GN=msk PE=1 SV=1	0.888	1.079	0.823	1.009	0.896	1.089	4.28444e-05	0.00380294	1.55872e-07	0.963339	9.07915e-05	0.00163751	10704	9503.4	11553.5	10606.5	1.99	2.09	2.58	3.3	1	34	138	34	40	119.2	4.86	0	257.713	10682.7	10364	10725.3	10867.1	9600.9	9208.9	9503.4	9293	9668.1	11130.4	11590.3	11850.8	11516.9	10156.7	10797.8	10917.4	10418.6	9799.8	9820.1
Q9VHU1	Probable ATP-dependent RNA helicase DDX55 homolog OS=Drosophila melanogaster OX=7227 GN=CG9630 PE=2 SV=1	0.819	0.945	0.867	1.056	0.864	0.997	4.35462e-05	0.215039	0.00144754	0.295467	0.000975819	0.99625	2252.2	1844.5	2128	2133.8	4.09	5.03	4.3	3	1	19	35	19	32	69	9.32	0	86.895	2287.5	2309.3	2106.7	2217.5	1844.5	1846.5	1720.6	1949.8	1745.3	2120.5	2163	1962.7	2135.5	2150.5	2147	2120.6	2015.5	2098.4	2188.1
P22977	Chorion protein S16 OS=Drosophila melanogaster OX=7227 GN=Cp16 PE=2 SV=2	3.319	0.569	5.828	1.642	5.451	0.935	4.37764e-05	0.0027087	1.2918e-07	0.0124658	3.25316e-07	0.83293	582.8	1934.3	331.9	354.9	30.35	22.98	8.21	21.78	1	3	10	3	36	14.3	7.81	0	23.821	568.5	558.1	984.3	597.4	2008.4	2389.3	1478	1350.5	1934.3	303.8	322.5	341.5	368	506.8	319.5	348.8	361.1	521.5	528.8
Q9VPR3	Carbohydrate kinase PfkB domain-containing protein OS=Drosophila melanogaster OX=7227 GN=Dmel\CG2794 PE=1 SV=1	0.834	0.953	0.875	1.01	0.842	0.963	4.38014e-05	0.507576	0.000459868	0.851233	0.000159573	0.924088	2363.6	1970.7	2252.8	2339.8	2.7	4.2	1.83	4.3	1	22	33	22	41	76.4	8.12	0	90.554	2403.2	2367	2255.8	2360.1	1947.5	1978.9	1970.7	2133.6	1919.6	2239.3	2266.4	2232.4	2323.5	2155.1	2330.2	2371.4	2349.4	2204.6	2242.8
Q8SYL0	CDP-diacylglycerol--glycerol-3-phosphate 3-phosphatidyltransferase OS=Drosophila melanogaster OX=7227 GN=PGS1 PE=2 SV=1	0.864	0.969	0.891	0.865	0.747	0.838	4.39311e-05	0.384124	0.00069519	9.70864e-05	1.76715e-08	9.02165e-06	1010.2	872.6	979.3	1168.2	4.55	1.98	2.2	3.77	1	10	13	10	17	56.4	9.03	0	40.28	1010.3	1010.1	963.2	1075.6	874.7	872.6	892.5	844.4	871	994.3	995.6	952.9	964.5	1238.5	1132.6	1169.6	1166.7	926.8	957.1
Q9VNW0	GEO11142p1 OS=Drosophila melanogaster OX=7227 GN=Dmel\CG7130 PE=2 SV=1	0.874	0.988	0.885	0.915	0.799	0.903	4.40056e-05	0.944443	0.000105779	0.0061083	2.11187e-07	0.0022701	544	475.5	537.2	594.8	1.52	2.87	3.09	4.16	1	3	5	3	25	14.6	5.58	0	11.733	540.6	535.9	547.5	554.9	475.5	483.1	468.8	480.5	449.3	558.6	544.4	530.2	520.6	618	574.7	573.2	615.6	495.9	507.8
Q9W3L1	RE04053p OS=Drosophila melanogaster OX=7227 GN=Upf2 PE=1 SV=1	0.92	0.949	0.969	1.02	0.938	0.968	4.41838e-05	0.00217591	0.189611	0.423192	0.000610303	0.0379532	2289.6	2106	2172.8	2245.1	1.67	1.89	1.19	2.06	1	23	41	23	22	140	5.67	0	107.761	2346.6	2295.2	2254.8	2284	2153.6	2152.9	2062.5	2090.3	2106	2163.8	2189.4	2131.5	2181.9	2303.3	2213.6	2210.2	2277	2152.7	2174.7
Q8T045	O-glucosyltransferase rumi OS=Drosophila melanogaster OX=7227 GN=rumi PE=1 SV=1	1.119	1.071	1.044	1.026	1.148	1.1	4.42854e-05	0.00483783	0.0874302	0.510815	5.60747e-06	0.000412063	1958.1	2190.4	2098	1907.7	1.43	0.99	2.65	3.42	1	14	25	14	35	47.7	8.25	0	76.474	1936.1	1987.5	1980.3	1934.9	2190.4	2147.2	2199.8	2170.8	2194.3	2121.5	2030.8	2158.7	2074.7	1849.4	2001.4	1885.3	1930.3	1776.1	1883.2
O96689	FI11703p OS=Drosophila melanogaster OX=7227 GN=vtd PE=1 SV=1	1.127	1.034	1.09	0.897	1.011	0.928	4.44095e-05	0.195288	0.00166273	0.00021585	0.894551	0.00854746	1391	1567.6	1438.6	1550.9	2.8	2.73	0.95	2.45	1	12	24	12	18	79.9	5	0	44.415	1389.8	1341.3	1436.5	1392.3	1611.1	1577.5	1567.6	1517.5	1510.3	1458.6	1426.4	1442.3	1434.8	1562.9	1486.1	1538.9	1569	1274.9	1270.9
Q9W330	Phosphotransferase OS=Drosophila melanogaster OX=7227 GN=Hex-A PE=1 SV=1	0.895	0.918	0.976	0.959	0.859	0.88	4.46169e-05	0.00124824	0.313967	0.145473	1.73618e-06	3.15633e-05	3001.6	2687.3	2754.1	3129.1	1.02	1.87	3.65	1.44	1	20	54	20	46	59.2	6	0	100.755	3008	3054.2	2984.4	2995.3	2750.3	2687.3	2675.4	2786.4	2675.1	2934.9	2711.3	2779.6	2728.8	3158.9	3063.1	3104.9	3153.4	2759.4	2893.8
Q8MLY8	Small ribosomal subunit protein eS8 OS=Drosophila melanogaster OX=7227 GN=RpS8 PE=1 SV=1	0.904	0.946	0.956	1.039	0.94	0.983	4.49206e-05	0.00860993	0.049427	0.14385	0.00240745	0.42081	6513.8	5888.3	6161.6	6266.8	1.41	1.86	2.26	2.93	1	10	87	10	50	23.7	10.48	0	65.135	6494.3	6639.7	6418.4	6533.4	5790.6	5938.2	5779.9	6043.4	5888.3	6112.9	6288.6	5966.9	6210.8	6210.8	6323.2	6540.3	6109.6	5957.6	6291.2
Q9VAG5	Claret, isoform A OS=Drosophila melanogaster OX=7227 GN=ca PE=1 SV=4	1.165	1.034	1.127	0.941	1.096	0.973	4.53577e-05	0.492836	0.000500941	0.0775252	0.00486227	0.616179	1800	2097.6	1861.2	1913.8	2.71	3.22	1.66	4.06	1	21	40	21	12	217.8	5.71	0	100.504	1749.7	1799.9	1868.7	1800.1	2130.6	2031	2163.9	2003.7	2097.6	1877.6	1828	1896.4	1845	1975.9	1853.6	1838.5	1984.4	1605.1	1705.4
P35421	Phosphoribosylformylglycinamidine synthase OS=Drosophila melanogaster OX=7227 GN=Pfas PE=1 SV=2	0.899	0.973	0.923	0.958	0.861	0.933	4.59571e-05	0.443378	0.000596503	0.225022	2.53976e-06	0.0156489	16904.5	15188.9	16454.2	17640	0.75	1.85	1.25	3.77	1	48	138	48	40	148	5.68	0	293.543	16700.4	16981.9	16949.9	16859.2	14882.7	14982.4	15363.5	15577.8	15188.9	16731.1	16515.9	16392.8	16245.8	16507.7	17923.1	17875.5	17407.6	15320.2	16090.6
Q9VV72	Multiple inositol polyphosphate phosphatase 1 OS=Drosophila melanogaster OX=7227 GN=Mipp1 PE=1 SV=2	1.567	0.863	1.816	1.232	1.931	1.064	4.60039e-05	0.223532	2.52745e-06	0.124718	1.58151e-06	0.982428	2785.9	4366.7	2404.7	2261	5.43	15.15	6.04	11.15	1	11	24	11	23	53.5	6.74	0	58.259	2965.9	2815.4	2756.7	2599.9	4839.4	4116.8	4366.7	3927.2	5664.2	2213.4	2410	2567.3	2399.4	2702.3	2362.4	2135.9	2163.9	2720.8	2667.6
Q9VXY3	Dihydrolipoamide acetyltransferase component of pyruvate dehydrogenase complex OS=Drosophila melanogaster OX=7227 GN=Dbct PE=1 SV=1	0.838	0.458	1.83	1.812	1.518	0.83	4.60112e-05	4.27569e-12	4.72167e-12	7.222e-12	1.28323e-10	1.02207e-05	5945.8	4981.3	2722.3	3281.3	2.17	3.96	3.16	2.91	1	17	47	17	47	50	6.61	0	114.367	6001	6067.2	5773.7	5891.1	4981.3	5380	4957.7	5267	4947.7	2709.7	2734.9	2597.7	2803.6	3247.9	3123.5	3331.9	3315	5505.1	5748.7
Q7JUR5	Uncharacterized zinc finger protein CG12744 OS=Drosophila melanogaster OX=7227 GN=CG12744 PE=1 SV=1	0.625	0.847	0.738	0.996	0.622	0.843	4.62094e-05	0.228531	0.00144243	0.998539	3.62407e-05	0.179279	71.1	44.5	60.2	71.5	8.8	12.8	3.99	6.64	1	1	1	1	6	18.6	6.29	0.003	2.845	70.1	72.2	60.8	74.9	49.5	35.9	44.5	43.6	50.1	58	60.2	60.3	63.8	63.6	74	72.9	70.1	64.3	68.4
Q9W3H5	GEO04367p1 OS=Drosophila melanogaster OX=7227 GN=Dmel\CG2147 PE=1 SV=1	1.219	1.004	1.215	1.018	1.241	1.022	4.66769e-05	0.997168	6.35552e-05	0.869855	1.48276e-05	0.774378	673.2	820.9	675.9	661.6	3.47	3.66	4.67	4.26	1	4	9	4	36	17.1	10.26	0	16.014	687.5	654.5	703.9	659.2	820.9	853.8	789.9	783.8	836	682.7	722.5	646.8	669.2	644.9	632.1	678.8	692.2	630.7	620.1
Q9VH14	Tissue inhibitor of metalloproteinase OS=Drosophila melanogaster OX=7227 GN=Timp PE=1 SV=1	1.327	0.906	1.465	1.082	1.435	0.98	4.68608e-05	0.0768347	1.12613e-06	0.155818	1.90731e-06	0.973958	198.6	263.5	179.9	183.6	5.53	7.29	2.07	7.42	1	3	4	3	12	24	9.51	0	10.738	219.1	201.6	195.7	195	283	254.3	251.2	263.5	297.2	180.1	179.6	185.9	177	200	190.9	169.7	176.6	201	191
O76994	Ribosome biogenesis protein NSA2 homolog OS=Drosophila melanogaster OX=7227 GN=Ip259 PE=2 SV=1	0.769	0.96	0.801	0.991	0.762	0.951	4.68657e-05	0.862214	0.000164709	0.999603	4.00325e-05	0.814354	5125.9	3941.7	4919.1	5174.2	6.39	5.81	4.45	5.66	1	13	28	13	50	30	10.49	0	69.946	5489	5344.1	4808.6	4916.6	3950.4	3941.7	3700.8	4313.2	3823	4806.9	5270.2	4806.1	5033.9	5026.3	5464.9	5326.5	4817.2	5035.4	5063.6
Q9GQQ0	Protein spinster OS=Drosophila melanogaster OX=7227 GN=spin PE=1 SV=1	0.706	1.103	0.64	0.931	0.657	1.027	4.71963e-05	0.255728	2.90523e-06	0.600107	7.34033e-06	0.900532	584.9	413	645.4	628.2	4.35	10.72	4.58	4.5	1	8	20	8	15	65.8	6.7	0	54.432	618.7	599.5	563.7	570.7	408.5	447.3	413	486.6	365.2	677.8	669.2	622.4	622.5	615.2	655.9	641.5	592.4	567.6	568
Q7KVX1	Pyruvate dehydrogenase E1 component subunit alpha OS=Drosophila melanogaster OX=7227 GN=Pdha PE=1 SV=1	0.915	0.921	0.993	0.973	0.89	0.896	4.74725e-05	0.000186935	0.941636	0.216127	2.5209e-06	9.16157e-06	5768.3	5278.7	5314.1	5929.3	2.05	2.46	1.09	1.95	1	20	64	20	47	48.8	8.13	0	139.964	5780.7	5969.7	5755.9	5693.7	5088.6	5444.8	5278.7	5260	5335.9	5383.8	5269	5355.4	5273.1	5899.2	5886.1	5959.6	6138.2	5303	5656.4
Q9W2E3	Negative cofactor 2alpha OS=Drosophila melanogaster OX=7227 GN=NC2alpha PE=1 SV=2	0.919	0.995	0.924	0.983	0.904	0.978	4.76665e-05	0.996556	6.63241e-05	0.873626	1.53172e-05	0.771933	789.2	725.6	785.2	802.6	1.61	1.62	2.32	2.04	1	6	10	6	19	36.2	7.4	0	20.818	785.9	809.9	792.4	780.7	725.6	710.4	733.2	715.3	738.4	815.5	774.5	791.1	779.3	801.2	778.3	804.1	817.7	721	767.4
Q9VW47	Mediator of RNA polymerase II transcription subunit 12 OS=Drosophila melanogaster OX=7227 GN=kto PE=1 SV=2	1.142	1.179	0.968	0.927	1.059	1.094	4.78635e-05	1.10548e-05	0.481239	0.0152682	0.0294514	0.00315355	1276.8	1458.3	1505.8	1376.9	1.86	2.07	2.52	4.03	1	26	35	26	13	279.3	7.58	0	108.487	1258.1	1282.7	1313.8	1271	1436.7	1490.5	1458.3	1416.6	1478.5	1503.4	1441.9	1529.6	1508.3	1432.8	1307	1352.3	1402	1154.1	1215.4
P32748	Dihydroorotate dehydrogenase (quinone), mitochondrial OS=Drosophila melanogaster OX=7227 GN=Dhod PE=2 SV=2	1.056	0.985	1.071	1.094	1.156	1.078	4.84204e-05	0.322293	3.68134e-06	3.32083e-07	5.8373e-10	2.59894e-06	5536.6	5845.9	5455.9	5059	0.79	1.79	0.81	0.66	1	21	62	21	64	44.3	9.25	0	158.357	5519.6	5553.7	5574.9	5474.2	5845.9	5906.8	5779.9	5713.8	5980.7	5427.3	5396.9	5484.6	5487.3	5060.3	5000.9	5057.8	5077.1	5063.4	5262.2
P05205	Heterochromatin protein 1 OS=Drosophila melanogaster OX=7227 GN=Su(var)205 PE=1 SV=2	1.23	1.016	1.21	0.96	1.181	0.976	4.85427e-05	0.60901	0.000380182	0.32341	0.00098455	0.948652	3217.4	3957.6	3270.2	3350.2	3.88	3.87	5.15	3.3	1	16	49	16	65	23.2	5.08	0	106.704	3107.8	3359.5	3305.1	3132	3957.6	4043.6	4025.8	3708.9	3777.3	3295.4	3238.8	3600.3	3245.2	3559.3	3328.3	3372.2	3319.3	2851	3183.2
Q5KR48	Tropomyosin beta chain OS=Bos taurus OX=9913 GN=TPM2 PE=2 SV=1	0.632	0.745	0.848	0.981	0.62	0.73	4.90041e-05	0.00355359	0.133109	0.975269	2.60272e-05	0.0017078	214.3	135.4	159.6	218.5	12.82	7.68	7.46	7.56	1	2	4	2	5	32.8	4.7	0	5.045	218.6	210.1	180	246.6	132.2	139.2	135.4	157.8	132.2	161.6	147.6	176.5	157.6	199.8	226	211.2	237.5	200.6	199.1
Q9VUW1	Inositol-1-monophosphatase OS=Drosophila melanogaster OX=7227 GN=cg17026 PE=2 SV=1	1.886	1.048	1.799	1.157	2.183	1.213	4.90606e-05	0.994339	7.26206e-05	0.221399	2.64509e-06	0.14982	68.1	128.5	71.4	58.9	14.55	14.54	13.72	7.09	1	3	3	3	17	31.4	6.04	0	11.953	65	87.2	71.4	65	128.5	151.3	116.3	110.3	150.9	66.6	65	86.8	76.6	65.5	55.4	58.3	59.5	59.6	82.7
Q9VM71	5'-3' exoribonuclease 2 homolog OS=Drosophila melanogaster OX=7227 GN=Rat1 PE=1 SV=2	0.899	0.984	0.914	1.004	0.902	0.988	4.93386e-05	0.969937	9.98029e-05	0.951636	2.21697e-05	0.770053	4698.2	4223.9	4622.5	4680.5	2.66	2.75	0.99	0.8	1	31	71	31	39	103.9	7.05	0	174.734	4741.9	4736.8	4476.9	4659.9	4223.9	4110.2	4095.1	4334.4	4334	4568	4676.8	4636.7	4608.5	4656	4697	4738.7	4664.1	4350	4488.2
Q9VPR1	GH02075p OS=Drosophila melanogaster OX=7227 GN=Tspo PE=1 SV=1	1.406	1.311	1.073	1.18	1.66	1.547	4.95203e-05	0.00101071	0.408595	0.0483031	8.53002e-07	1.08575e-05	478.4	672.7	627	405.3	4.75	5.06	3.65	13.24	1	3	7	3	21	20.1	9.45	0	20.737	446.5	496	489.6	467.4	672.7	636	689	658.9	727.2	632.5	593.2	646.9	621.6	453.2	362.5	359.8	456.2	409.6	470
Q9W3L4	GH20802p OS=Drosophila melanogaster OX=7227 GN=Dmel\CG2233 PE=1 SV=1	0.505	0.498	1.014	1.637	0.827	0.816	4.96083e-05	0.000128534	0.991828	0.00339985	0.140818	0.257124	1744.9	881.3	869.4	1066	9.83	14.74	4.16	22.62	1	10	13	10	28	46.5	6.38	0	35.905	1776.7	1823.2	1713.7	1450.9	749.3	924	1002.9	881.3	698.4	823.3	910.1	860.7	878.2	809.1	1146.6	1387.5	991	1629.9	1727.5
Q9VU38	Adenosine kinase OS=Drosophila melanogaster OX=7227 GN=Adk2 PE=1 SV=1	0.922	1.025	0.9	1.014	0.936	1.04	4.96435e-05	0.144871	1.88813e-06	0.719046	0.00028112	0.0225931	2433.4	2244.4	2493.8	2398.8	1.36	1.72	1.72	2.09	1	7	24	7	30	37.8	5.38	0	44.699	2382.3	2441.2	2425.5	2459.5	2244.4	2242	2171.3	2253.4	2272.4	2449	2492.2	2495.5	2553.5	2362	2436.3	2441.2	2343.9	2185.4	2313.1
P19339	Protein sex-lethal OS=Drosophila melanogaster OX=7227 GN=Sxl PE=1 SV=1	0.817	0.95	0.86	1.037	0.848	0.986	4.96948e-05	0.291078	0.00116064	0.393283	0.000775126	0.995875	1446.5	1182.3	1374.6	1394.6	3.58	4.62	3.76	3.04	1	9	13	8	27	38.5	9.5	0	42.419	1517.8	1394.7	1461.5	1431.6	1181.2	1182.3	1154.7	1285.6	1257.2	1370.4	1378.8	1322.1	1448	1431.4	1385.3	1403.9	1331.3	1392.3	1321.5
Q7KRY6	Nucleosomal histone kinase 1 OS=Drosophila melanogaster OX=7227 GN=ball PE=1 SV=1	1.213	1.154	1.051	1.003	1.216	1.157	4.97545e-05	0.000384826	0.75235	0.988439	8.22335e-05	0.000653495	5196.3	6303	5994.9	5182.3	2.4	3.93	0.81	5.49	1	27	67	27	45	66	9.86	0	153.899	5051.2	5112.5	5303.3	5281.5	6021.8	6325.7	6330.3	5788.4	6303	6067.4	5993.8	5950.5	5995.9	5352.5	4982.3	5017.4	5585.2	4633.8	4844.2
Q24192	Ras-like GTP-binding protein RhoL OS=Drosophila melanogaster OX=7227 GN=RhoL PE=2 SV=1	1.294	1.01	1.282	1.271	1.644	1.283	5.04625e-05	1	5.03259e-05	0.000985006	7.77274e-08	0.000987947	453.4	586.7	457.8	356.8	5.42	7.31	4.95	5.8	1	3	4	3	17	21.9	8.76	0	16.855	443.8	484.5	463.3	427.5	616.7	586.7	563	570.9	671.3	425.8	448.8	477.1	467	355.5	398.3	354.1	358.2	407.1	459.1
Q9W3M6	Alkyl transferase OS=Drosophila melanogaster OX=7227 GN=Dhdds PE=1 SV=2	0.91	1.008	0.903	0.928	0.845	0.936	5.05297e-05	0.812721	1.33642e-05	0.00014719	2.47827e-08	0.000622473	1319.9	1201.2	1330.5	1422	1.61	1.58	1.42	2.93	1	9	17	9	33	35.2	6.73	0	42.341	1326.9	1316.8	1281	1323	1199.7	1205.3	1215.8	1201.2	1165.6	1306.8	1344.1	1343.7	1317.3	1412.3	1390.7	1431.8	1488.4	1217.3	1247.7
Q9VPH7	Eukaryotic peptide chain release factor subunit 1 OS=Drosophila melanogaster OX=7227 GN=eRF1 PE=1 SV=2	0.866	0.982	0.881	0.99	0.857	0.973	5.06734e-05	0.978713	9.45293e-05	0.796255	1.27875e-05	0.573536	3736.8	3235	3671.1	3773.2	3.06	4.02	1.13	2.71	1	15	58	15	46	49.1	6.09	0	100.098	3723.8	3749.9	3533	3786.4	3235	3253.1	3153.9	3376.9	3028.2	3704.2	3696.7	3618.1	3645.8	3652.5	3817.8	3886.8	3729.1	3416	3553.1
Q9VVT6	GEO08966p1 OS=Drosophila melanogaster OX=7227 GN=Grx1 PE=2 SV=1	1.159	0.859	1.35	1.314	1.523	1.128	5.07237e-05	1.90085e-05	7.03997e-09	5.26018e-08	1.85824e-10	0.00097599	2362.1	2737.2	2028	1797.5	3.77	2.42	3.84	1.58	1	4	17	4	32	12.4	8.44	0	25.951	2393	2331.5	2489	2281.4	2707.1	2772.1	2737.2	2636.4	2810.4	1912.7	2010.7	2096.4	2045.4	1805.7	1789.3	1847.1	1784.3	2195.3	2209.1
Q9VN25	Eukaryotic translation initiation factor 3 subunit A OS=Drosophila melanogaster OX=7227 GN=eIF3a PE=1 SV=1	0.926	1.02	0.907	0.994	0.921	1.015	5.12347e-05	0.589608	7.70401e-06	0.91279	1.90045e-05	0.920855	33328.6	30854.6	34010.1	33516.6	1.21	2.08	1.65	0.75	1	84	308	84	60	133.8	9.01	0	529.869	33784.8	33526.8	32883	33131.5	30854.6	31142.5	30601.8	32035.8	30377.1	34181	34195.6	33005.2	33840	33549.2	33484	33328.1	33918.8	30992.7	31767.1
Q9W1N8	LD45221p OS=Drosophila melanogaster OX=7227 GN=mi PE=2 SV=2	1.261	1.141	1.105	0.939	1.184	1.072	5.13869e-05	0.0270196	0.0176232	0.389561	0.000816355	0.395584	150.7	190.1	172	160.5	4.01	5.66	5.87	4.46	1	9	11	9	12	103.2	9.61	0	21.97	149.2	145.9	160.2	152.2	210.4	186.3	190.1	182.1	193.8	179.3	165	159.8	179.5	163.7	153.5	157.4	169.9	136.9	138.3
F3YDF1	ATP-dependent zinc metalloprotease YME1L OS=Drosophila melanogaster OX=7227 GN=YME1L PE=2 SV=1	0.868	0.942	0.922	1.008	0.875	0.949	5.15338e-05	0.0578134	0.00782986	0.985567	8.87954e-05	0.104694	6021.4	5226.6	5671.1	5974.2	2.59	3.38	1.63	3.17	1	29	72	29	40	81	8.57	0	168.749	6165.2	5940.4	5822.9	6103.4	5177.9	5386.7	5226.6	5494.5	5041.6	5786.7	5697.7	5566.2	5644.7	5768.6	6106.5	6151	5844.8	5655.7	5628.6
Q24133	DnaJ protein homolog 1 OS=Drosophila melanogaster OX=7227 GN=DnaJ-1 PE=1 SV=3	0.875	1.205	0.726	0.879	0.768	1.059	5.17442e-05	4.22439e-06	2.80322e-09	0.000113997	2.15162e-08	0.139138	2056.9	1798.9	2479.1	2341.4	3.79	2.94	3.14	2.02	1	16	40	16	50	37	8.85	0	80.014	1947.1	2102.5	2012.3	2108.6	1801.7	1742	1819.8	1798.9	1694.3	2476	2363.1	2550	2482.2	2320.2	2362.8	2296.8	2403.8	1786.2	1992.2
Q9VZ55	GH07148p OS=Drosophila melanogaster OX=7227 GN=Dmel\CG1582 PE=1 SV=2	1.084	1.031	1.051	0.982	1.064	1.012	5.24185e-05	0.0593508	0.00777041	0.401353	0.000800734	0.627115	3537.2	3833.4	3648	3603.7	2.12	1.48	1.43	1.8	1	36	59	36	30	146	7.4	0	162.242	3441.2	3550	3524.5	3623.3	3772.6	3772.9	3859.2	3903.8	3833.4	3647.9	3605.8	3648	3730.5	3532.8	3571.5	3636.2	3678.2	3156.8	3363.7
Q9VXB4	LD35155p OS=Drosophila melanogaster OX=7227 GN=Dmel\CG9609 PE=1 SV=1	0.693	0.951	0.729	1.08	0.749	1.027	5.26616e-05	0.962943	0.000112927	0.573934	0.000462242	0.838507	462.3	320.6	439.9	428.1	3.87	10.02	4.35	3.53	1	7	8	7	17	46.6	8.73	0	20.403	431.3	462.3	462.4	471.9	374.6	312.8	320.6	381.1	314.2	434.2	445.7	434	475.3	450.2	416.4	435.2	421.2	395.7	438.1
Q9VHX7	Very long chain fatty acid elongase 7 OS=Drosophila melanogaster OX=7227 GN=Elovl7 PE=2 SV=2	0.732	0.777	0.941	1.115	0.816	0.867	5.26734e-05	0.000141597	0.989545	0.118357	0.00364238	0.0092647	736.4	538.8	572.5	660.5	2.46	7.83	6.65	5.35	1	2	3	2	5	38.3	9.47	0	7.943	736.4	739.8	701.9	736.4	591.3	514.5	538.8	594.4	501.9	572.5	572.6	499.4	574.5	674.6	691.1	611	646.7	675.6	701
O77277	Torsin-like protein OS=Drosophila melanogaster OX=7227 GN=Torsin PE=2 SV=2	1.08	1.104	0.978	0.942	1.017	1.04	5.30421e-05	1.6283e-05	0.612765	0.000497378	0.684548	0.163619	3231.8	3490.5	3567.7	3430.6	1.28	1.7	1.3	2.61	1	12	40	12	43	38.1	8.62	0	79.433	3158.5	3251.8	3230.8	3232.7	3437.8	3490.5	3592.3	3513	3460.6	3584.4	3485.3	3581.7	3553.7	3371.9	3458.3	3403.1	3576.9	2897.5	3081.1
Q961L8	GH17661p OS=Drosophila melanogaster OX=7227 GN=Targ2 PE=1 SV=1	0.702	0.745	0.942	1.152	0.809	0.859	5.31661e-05	0.000200301	0.949975	0.0867972	0.00521194	0.0193041	274.4	192.6	204.6	238.2	5.01	9.66	1.92	5.28	1	6	10	6	16	39.1	7.84	0	18.685	283.7	268.7	253.6	280.3	223.7	192.6	191.1	221.2	180.2	205	211.4	204.1	202.3	229.8	257.7	244	232.6	260.2	254.6
Q9VDE8	FI02071p OS=Drosophila melanogaster OX=7227 GN=Dmel\CG7044 PE=1 SV=1	1.134	1.033	1.098	0.863	0.979	0.891	5.32654e-05	0.317494	0.00112368	2.89076e-05	0.845777	0.000468694	4131.7	4686	4268.7	4788.8	2.5	2.66	1.96	3.88	1	28	45	28	27	112.9	6.14	0	123.89	3985.7	4210.1	4183.8	4080.3	4686	4624.3	4768.2	4538.8	4861.4	4354.8	4169.8	4312.6	4225.2	4977.5	4786.5	4527.2	4791	3656.3	3989.2
P46863	Kinesin-like protein Klp61F OS=Drosophila melanogaster OX=7227 GN=Klp61F PE=1 SV=2	1.304	1.134	1.15	0.93	1.213	1.054	5.35616e-05	0.0412011	0.0118295	0.284414	0.00130499	0.656905	4133.2	5390.1	4687.4	4445.4	2.99	6.61	3.81	7.74	1	41	79	41	41	121.1	6.43	0	210.529	3946.9	4068.8	4198.6	4205.6	5258.7	5390.1	5589.8	4852	5788.7	4814.7	4402.8	4726.2	4648.9	4733	4110.8	4175.3	4740.1	3620.7	3855.2
Q9VII5	GEO08323p1 OS=Drosophila melanogaster OX=7227 GN=Dmel\CG31676 PE=2 SV=3	1.624	0.833	1.949	1.048	1.701	0.873	5.40539e-05	0.118799	1.73656e-06	0.999997	5.56948e-05	0.115074	159	258.3	132.5	151.8	8.35	9.86	4.11	16.57	1	1	1	1	5	17.6	7.91	0.001	3.143	158.1	159.9	175	142.6	280.6	218.6	258.3	281	254.8	135.2	138.5	126.3	129.9	198.8	154.2	138.5	149.4	145	151.5
P21914	Succinate dehydrogenase [ubiquinone] iron-sulfur subunit, mitochondrial OS=Drosophila melanogaster OX=7227 GN=SdhB PE=2 SV=2	0.913	0.959	0.951	1.091	0.996	1.047	5.51556e-05	0.0747562	0.00642646	0.000183323	0.968902	0.0204162	4506.7	4113.6	4324.1	4131.2	1.93	1.64	0.89	2.96	1	12	38	12	37	33.7	8.66	0	53.468	4473.6	4540.2	4557.6	4366.2	4139.6	4113.6	3972.6	4099.7	4123.5	4349.9	4268.9	4302.9	4345.3	3962.9	4188.5	4234.6	4074.7	4103.9	4301.9
Q9VZ61	Sister of feo, isoform A OS=Drosophila melanogaster OX=7227 GN=sofe PE=4 SV=2	1.199	1.068	1.123	0.962	1.153	1.027	5.53517e-05	0.14545	0.00305448	0.942902	0.00013583	0.336269	365	437.8	389.9	379.5	3.01	3.8	3.24	4.24	1	12	14	11	16	71	8.41	0	39.388	362.2	360.6	384.8	367.9	437.8	459.5	415.9	443.2	426.4	397.7	379.6	406.2	382.3	384.3	374.8	386.4	351.8	332.2	341.7
Q7KVJ6	Long-chain-fatty-acid--CoA ligase OS=Drosophila melanogaster OX=7227 GN=Fatp2 PE=2 SV=1	0.65	0.601	1.082	1.259	0.819	0.757	5.54948e-05	6.20985e-05	0.990666	0.0109314	0.0498495	0.0395718	384.1	249.9	230.9	305.2	5.97	10.26	6.44	13.38	1	5	7	2	8	78.5	8.38	0	14.77	369.4	399.5	354.2	399.9	195.6	252.6	249.9	252.9	244	220.2	251.7	239.9	222.3	310.4	235.6	323.8	300.1	338.8	378.5
Q9W135	RNase NYN domain-containing protein OS=Drosophila melanogaster OX=7227 GN=CG13588 PE=4 SV=3	0.83	1.012	0.82	0.85	0.705	0.86	5.55097e-05	0.999952	6.00716e-05	0.00400682	1.92517e-07	0.0036617	341.8	283.7	345.7	402.2	4.57	5.86	2.73	5.21	1	8	14	8	21	56.1	8.88	0	43.115	371.5	343.8	337	339.8	283.7	250.9	294	276.6	284	337.5	344.2	360.1	347.3	426.9	388	384.5	416.9	340.8	325.8
Q24478	Centrosome-associated zinc finger protein Cp190 OS=Drosophila melanogaster OX=7227 GN=Cp190 PE=1 SV=2	0.822	0.911	0.903	1.042	0.857	0.949	5.59893e-05	0.0384091	0.0134658	0.487085	0.000647553	0.400696	7424.5	6105.6	6760.4	7123.9	3.68	5.15	1.88	2.84	1	44	103	44	46	121.6	4.67	0	271.104	7546.3	7331	6960.9	7519.2	6105.6	5914.3	5900.7	6664.1	6311.3	6721.8	6919.4	6617.3	6799.3	7223	7082.9	7165	6772.9	6922.6	6946.2
P27864	Recombination repair protein 1 OS=Drosophila melanogaster OX=7227 GN=Rrp1 PE=1 SV=2	1.293	1.136	1.138	1.068	1.381	1.213	5.61079e-05	0.0112974	0.0488256	0.348928	4.51734e-06	0.000534007	4598.8	5944.6	5224.9	4305.8	1.49	7.44	2.17	4.77	1	24	71	23	37	74.6	8.98	0	118.701	4488.1	4636.3	4626.8	4570.9	5701.3	5944.6	5978.5	5091.9	6222.5	5244.9	5100.9	5375	5205	4512.2	4150.9	4119.5	4466.4	4117.2	4393
P51406	Bystin OS=Drosophila melanogaster OX=7227 GN=bys PE=1 SV=2	0.795	0.982	0.809	1.038	0.826	1.02	5.61207e-05	0.95864	0.000124527	0.682684	0.000358843	0.92157	4564.4	3628.9	4483.7	4395.7	3.2	6.24	2.96	4.43	1	19	48	19	39	49.9	8.46	0	100.581	4650.3	4591.6	4318.8	4537.3	3628.9	3493.8	3488.9	4049	3705.2	4274.2	4570.2	4436.1	4531.7	4269.7	4529.6	4525.5	4140.9	4266	4350.6
Q9VJ81	UDP-glucuronosyltransferase OS=Drosophila melanogaster OX=7227 GN=Ugt301D1 PE=2 SV=2	1.355	1.26	1.075	1.004	1.36	1.265	5.6144e-05	0.00100568	0.454686	0.962025	2.67838e-05	0.000446106	611.9	829	770.9	609.5	4.1	8.87	4.33	5.31	1	4	6	4	9	61.4	8.65	0	14.052	596.6	627.6	639.3	586.1	749	745	893.7	891.2	829	734.3	796.8	797.7	745.9	553.5	609.7	626.4	609.3	547.3	594.6
Q9W196	HECT-type E3 ubiquitin transferase OS=Drosophila melanogaster OX=7227 GN=Dmel\CG3356 PE=1 SV=1	1.108	1.045	1.061	0.96	1.064	1.003	5.62541e-05	0.0541287	0.00936214	0.102345	0.00464522	0.982483	1565.9	1735.7	1635.8	1631.4	1.39	2.93	2.01	2.6	1	26	44	26	27	128.9	6.89	0	134.694	1536.1	1575.9	1584.9	1556	1683.3	1735.7	1711.5	1780.9	1809.1	1655.8	1610.7	1679.6	1616	1638.6	1624.3	1578.6	1681.4	1409.1	1493.2
Q9VX91	E3 ubiquitin-protein ligase UBR1 OS=Drosophila melanogaster OX=7227 GN=Ubr1 PE=2 SV=2	0.871	0.998	0.873	0.983	0.856	0.981	5.66331e-05	0.999776	6.46641e-05	0.539764	7.47306e-06	0.492058	5376.7	4684	5367	5470.5	2.97	3.37	1.88	1.82	1	43	78	43	29	208.2	6.43	0	231.07	5543.6	5386.6	5155.3	5366.9	4684	4799.3	4599.4	4996.3	4640.2	5406	5455.7	5224.3	5328.3	5418.6	5486.1	5645.4	5454.9	5085.5	5103.8
Q9VKM7	AT01533p OS=Drosophila melanogaster OX=7227 GN=Tmem214 PE=1 SV=2	0.909	0.955	0.952	1.06	0.964	1.013	5.6671e-05	0.0131756	0.0421604	0.00266567	0.204042	0.813714	11545.7	10496.6	11026.9	10889.9	2.66	1.13	0.97	2.71	1	31	94	31	46	75.6	9.44	0	172.239	11381.7	11945.7	11274.3	11712	10496.6	10470.3	10725.7	10644.8	10457.4	11081.5	10840.8	11046.1	11007.7	10475.6	10851.6	10928.2	11189.1	10441.1	11318.7
Q9VP06	GDP-Man:Man(3)GlcNAc(2)-PP-Dol alpha-1,2-mannosyltransferase OS=Drosophila melanogaster OX=7227 GN=Alg11 PE=1 SV=2	0.863	0.738	1.168	0.988	0.852	0.73	5.67331e-05	9.27963e-09	5.26322e-06	0.570749	8.06451e-06	3.23266e-09	2161.2	1864.3	1595.9	2187.6	3.18	3.74	1.44	1.38	1	11	16	11	24	54.5	7.94	0	59.051	2169.5	2174.4	2031.3	2152.9	1873.5	1858.4	1803.1	1994.2	1864.3	1636.9	1595.2	1596.6	1584.3	2149.7	2198.7	2219.9	2176.6	1990.2	2060.3
Q9VCA5	Phenylalanine--tRNA ligase beta subunit OS=Drosophila melanogaster OX=7227 GN=beta-PheRS PE=1 SV=1	0.945	1.048	0.902	1.022	0.966	1.071	5.68002e-05	0.000483885	5.47844e-08	0.027272	0.0197321	4.05106e-06	8626	8150.1	9040.5	8439.2	0.67	0.8	1.08	1.8	1	25	72	25	50	65.7	6.04	0	167.921	8658.5	8532.9	8603.1	8649.1	8080.7	8145.1	8176.3	8261	8150.1	9061.6	9019.3	9089.1	8870.1	8161.6	8440.7	8498.5	8437.6	7943	8085
Q9VN82	Canoe, isoform E OS=Drosophila melanogaster OX=7227 GN=cno PE=1 SV=2	1.047	0.978	1.071	0.996	1.043	0.973	5.68742e-05	0.107792	1.6813e-06	0.437975	0.000774484	0.00665935	3605.2	3775.5	3524.6	3621.4	1.08	1.24	0.45	1.19	1	40	74	39	24	226.8	7.23	0	207.756	3607.3	3603.1	3537.6	3626.6	3818.6	3757.4	3703.9	3813.2	3775.5	3514.7	3545.9	3513.6	3534.5	3695.7	3603.7	3639.1	3603.7	3309.2	3413.9
Q9VWD1	Cytochrome c oxidase subunit OS=Drosophila melanogaster OX=7227 GN=COX6B PE=1 SV=2	2.934	0.502	5.842	2.061	6.049	1.035	5.69072e-05	0.00307429	1.6683e-07	0.00239391	1.43451e-07	0.998956	1298.1	3809.3	652	629.7	44.15	8.44	5.38	8.55	1	9	17	9	54	11.4	8.7	0	28.05	1542.7	1092.3	2253.7	811.7	3751.1	3831.1	3809.3	3189.7	4023.1	633.3	671.4	621.6	698.5	595.7	605.1	655.3	715.3	1415.2	1034.9
Q7JWF1	Electron transfer flavoprotein-ubiquinone oxidoreductase OS=Drosophila melanogaster OX=7227 GN=Etf-QO PE=1 SV=1	1.082	0.995	1.087	1.03	1.114	1.025	5.69388e-05	0.955962	2.60937e-05	0.136075	2.0105e-06	0.29656	6015.3	6509.1	5987.1	5841.9	0.35	2.63	1.22	1.87	1	19	56	19	39	65.9	6.64	0	128.628	5994.5	6045.7	6014	6016.6	6305.5	6720.7	6708.5	6498.1	6509.1	6056.3	5884.7	6007.4	5966.9	5705.4	5965.7	5871.5	5812.5	5499.1	5728.3
Q9V9J3	Tyrosine-protein kinase Src42A OS=Drosophila melanogaster OX=7227 GN=Src42A PE=1 SV=1	0.859	0.88	0.976	1.049	0.901	0.923	5.83307e-05	0.000242776	0.931776	0.328545	0.00119302	0.00512061	2189.5	1880.8	1926.3	2087.9	3.83	3.36	0.42	3.2	1	17	28	16	36	59	6.68	0	80.84	2267	2257.9	2123.3	2111.8	1880.8	1841.4	1853.8	1977.6	1966.7	1928.8	1916.8	1936.1	1923.9	2051.1	2205.2	2097	2078.8	2079.7	2139.4
Q24151	Signal transducer and transcription activator OS=Drosophila melanogaster OX=7227 GN=Stat92E PE=1 SV=1	0.884	0.901	0.981	1.103	0.975	0.994	5.85927e-05	0.000149399	0.992703	0.000267962	0.91142	0.982543	1528.1	1350.4	1376.9	1385.2	1.36	3.83	0.91	0.83	1	15	30	15	22	86.4	6.14	0	91.729	1537.5	1524.3	1491.3	1532	1346.3	1355.7	1350.4	1341	1465.2	1363	1369.3	1384.5	1389.6	1390.6	1371.1	1379.9	1397	1410.4	1444.3
Q9W0Q3	BLOC-1 related complex subunit 6, isoform A OS=Drosophila melanogaster OX=7227 GN=BORCS6 PE=1 SV=1	0.785	1.021	0.769	1.027	0.807	1.048	5.86817e-05	0.977699	3.16646e-05	0.881857	0.000193864	0.677282	420.1	329.9	428.8	409	3.92	8.37	3.52	4.69	1	4	6	4	17	32.8	4.97	0	10.381	405.4	419.3	420.9	445.3	304.1	347.9	329.9	350.9	289.1	421	413.6	447.1	436.7	406.6	388.2	435	411.3	371.9	397.3
M9PF79	Simjang, isoform E OS=Drosophila melanogaster OX=7227 GN=simj PE=1 SV=1	1.28	1.607	0.797	0.788	1.009	1.267	5.94704e-05	3.00257e-07	0.0017854	0.000490141	0.733533	0.000506119	602.5	771.4	968.5	764.4	2.7	6.61	3.29	8.91	1	8	14	8	10	98	9.66	0	40.664	604	601	631.8	594.7	801.1	764	771.1	771.4	890.7	966.2	924.2	1001.4	970.8	837.7	704.1	715.5	816.7	554.1	569.5
Q9VH48	Probable histone-arginine methyltransferase CARMER OS=Drosophila melanogaster OX=7227 GN=Art4 PE=1 SV=1	1.426	1.148	1.242	0.938	1.338	1.077	5.98263e-05	0.107573	0.00473113	0.620725	0.000463306	0.598508	2390.6	3409.7	2744.5	2548.1	4.49	8.61	4.67	9.39	1	15	42	15	34	59.7	6.13	0	105.754	2285.7	2398.4	2547.1	2382.7	3265.3	3409.7	3603.3	2944.2	3671.2	2820.4	2590.3	2864.2	2670.6	2716.6	2390.1	2338.2	2829	2096.8	2272.6
Q9VUZ0	Translocon-associated protein subunit beta OS=Drosophila melanogaster OX=7227 GN=SsRbeta PE=1 SV=2	0.86	0.867	0.992	1.074	0.924	0.931	5.99933e-05	0.000281982	0.905158	0.0729839	0.00730883	0.0340614	1393.8	1199.2	1208.3	1298.1	0.35	5.16	2.21	3.09	1	3	14	3	28	21.2	8.72	0	22.91	1399.4	1387.6	1394.2	1393.4	1198.4	1199.8	1199.2	1264.5	1093.6	1195.9	1239.1	1178.7	1220.8	1269.5	1353.7	1322.4	1274.2	1283.8	1314.8
Q7KMQ0	26S proteasome regulatory subunit 7 OS=Drosophila melanogaster OX=7227 GN=Rpt1 PE=1 SV=1	1.094	1.146	0.955	0.927	1.014	1.062	6.01714e-05	6.01686e-07	0.00583885	0.000150858	0.993558	0.00547896	10804.9	11820	12381.3	11654.4	1.83	1.86	0.62	2.54	1	28	108	27	62	48.5	6.04	0	152.362	10705.9	10595.1	11037	10904.9	11820	11809.7	11858.5	11394	11964.4	12457.4	12320.9	12441.9	12313.1	11728.4	11471.1	11580.8	12150.4	9821.1	10038.9
Q8IQ92	FI01426p OS=Drosophila melanogaster OX=7227 GN=HP4 PE=1 SV=2	1.448	1.229	1.178	0.948	1.373	1.166	6.0252e-05	0.0103778	0.0579756	0.760729	0.000305428	0.0617125	327.2	473.8	402.2	345	7	6.09	5.43	12.72	1	1	1	1	9	12.1	9.76	0.009	2.284	285.5	331.1	333.2	323.3	499.2	454	473.8	425.4	483	416	371.2	415.1	389.7	375.8	319.2	287.3	372.9	261.9	313.7
P52295	Importin subunit alpha OS=Drosophila melanogaster OX=7227 GN=Pen PE=1 SV=2	1.174	1.198	0.98	0.93	1.092	1.114	6.06112e-05	3.03241e-05	0.821212	0.0576296	0.00958036	0.00308825	8387.9	9850.6	10052.7	9023.1	4.77	3.82	1.58	2.4	1	26	129	26	68	57.8	5.35	0	229.817	8109.5	8084.6	8881.9	8675.8	9850.6	9823.1	10264.6	9290.4	10142.6	10236.2	9929.2	10170.6	9936.1	9100.6	8946.2	8795.1	9302.9	7439.3	7660.3
Q9VS85	FI19443p1 OS=Drosophila melanogaster OX=7227 GN=lqf PE=1 SV=3	0.916	0.995	0.921	1.013	0.928	1.008	6.09691e-05	0.758774	0.000311308	0.571756	0.000548144	0.987664	4187.6	3837.6	4166.8	4134.1	2.67	1.43	0.64	2.86	1	16	43	16	25	88.7	5.44	0	103.963	4177.4	4140.9	4197.9	4393.1	3940.6	3808.6	3804.6	3841.5	3837.6	4133.3	4160.9	4197.8	4172.8	4124.9	4017.8	4143.4	4305.2	3832.1	3923.5
Q9W4A0	GH11193p OS=Drosophila melanogaster OX=7227 GN=Rab18 PE=1 SV=1	1.12	1.075	1.042	1.006	1.126	1.081	6.09995e-05	0.00684682	0.0894891	0.958337	0.000136151	0.0169637	1983	2220.2	2131.2	1971.6	2.19	2.93	1.73	3.67	1	8	21	8	43	22.1	5.36	0	43.502	1920.5	1981.3	2025.8	1984.7	2197.2	2172.8	2323.4	2220.2	2299.7	2182.8	2105.8	2153.6	2109.1	1971.9	1971.4	1941.9	2105.8	1761.8	1877.3
Q9NG60	Eukaryotic translation initiation factor 2D OS=Drosophila melanogaster OX=7227 GN=eIF2D PE=1 SV=1	1.07	1.12	0.955	1.049	1.123	1.176	6.11194e-05	1.10078e-06	0.0158336	0.00241437	1.51352e-07	1.11873e-08	3643.8	3900	4082.4	3472.9	1.39	1.56	2.11	0.68	1	21	46	21	47	61.9	8.43	0	116.362	3641.9	3584.9	3708.6	3645.8	3880.3	3900	3967.4	3977.1	3831.6	3936.9	4058.4	4129.1	4106.6	3434.3	3490	3470.7	3475.1	3340.9	3396.7
Q9VL06	E3 ubiquitin-protein ligase Ufd4 OS=Drosophila melanogaster OX=7227 GN=Ufd4 PE=2 SV=1	0.744	0.989	0.752	0.989	0.736	0.979	6.15399e-05	0.99901	7.66566e-05	0.9584	2.85461e-05	0.918905	6214.2	4622.7	6148.2	6280.2	4.66	8.21	4.82	2.88	1	48	82	48	20	302	5.43	0	237.918	6241.1	6277.2	5671.8	6187.3	4622.7	4744	4546.7	5307.8	4259.8	6245.2	6294.1	5651.1	6052.8	5958.9	6222.4	6339	6338.5	5725.3	5947.7
Q9VJZ5	LD07294p OS=Drosophila melanogaster OX=7227 GN=Tap42 PE=1 SV=2	1.191	1.232	0.967	1.035	1.232	1.275	6.16201e-05	1.53084e-05	0.527	0.620631	9.7874e-06	3.04883e-06	2924.6	3483.6	3602.9	2826.8	3.57	2.86	4.89	3.04	1	15	41	15	43	43.3	5.4	0	91.85	2839.3	2831.9	3012.5	3020	3529.9	3429.6	3541.7	3298.2	3483.6	3374.9	3488.4	3726.4	3721.1	2837.8	2815.9	2738	2946.7	2604.7	2683.2
Q9VP57	LD15904p OS=Drosophila melanogaster OX=7227 GN=pzg PE=1 SV=1	0.938	1.046	0.897	0.997	0.936	1.043	6.18143e-05	0.00113219	9.65666e-08	0.99237	9.60158e-05	0.000707016	4592.1	4308	4802.3	4604.8	0.41	1.25	1.96	1.41	1	16	65	16	23	105	4.89	0	148.103	4622.3	4591.4	4592.7	4577.5	4262.7	4311.9	4297.1	4308	4407.4	4759.3	4951.2	4746	4845.7	4621.2	4588.4	4635.3	4491.6	4240.3	4350.4
A1Z9S6	Su(Var)2-HP2, isoform A OS=Drosophila melanogaster OX=7227 GN=Su(var)2-HP2 PE=1 SV=1	1.125	1.03	1.092	0.966	1.086	0.995	6.22507e-05	0.273116	0.00163823	0.105234	0.00508764	0.929197	2297.1	2583.8	2366.7	2379	1.48	3.47	1.62	2.92	1	62	82	62	22	355.8	6.14	0	247.041	2289.3	2324.5	2244.7	2304.9	2583.8	2715.7	2486.7	2514	2602.4	2331	2365.8	2424.1	2367.6	2494.3	2343.4	2409.2	2349.2	2100.1	2202.5
P49657	Serine/threonine-protein kinase minibrain OS=Drosophila melanogaster OX=7227 GN=mnb PE=1 SV=2	0.856	0.624	1.371	1.242	1.063	0.775	6.24051e-05	4.8391e-10	4.11169e-08	7.539e-06	0.255596	5.31707e-07	735.4	629.1	458.8	591.9	3.98	2.25	2.44	5.02	1	8	11	8	9	95.8	8.85	0	33.083	740.8	772.5	701.7	730	611.1	633.4	615.6	646.3	629.1	458.8	478.3	452.3	458.7	571.9	590	642.3	593.9	679.6	732
Q9VXX8	Large ribosomal subunit protein eL37A OS=Drosophila melanogaster OX=7227 GN=RpL37-1 PE=1 SV=1	0.813	0.901	0.902	1.095	0.89	0.987	6.27289e-05	0.00956639	0.0660384	0.036852	0.0161717	0.879244	7276.9	5915.6	6557.2	6643.7	2.61	4.2	3.92	6.28	1	4	19	4	30	10.6	11.69	0	12.818	7587.1	7337.3	7217	7153.5	5915.6	6165.4	5843.7	6294.8	5670.5	6709.7	6653.7	6146.3	6462	6385.9	7093.3	6911.9	6215	6960.1	6952.2
Q7KRW8	Pre-mRNA-processing factor 39 OS=Drosophila melanogaster OX=7227 GN=Prp39 PE=1 SV=1	0.894	0.964	0.927	1.062	0.949	1.024	6.28527e-05	0.200365	0.00243423	0.0265803	0.0229381	0.652786	4697.3	4198	4529.8	4422.3	2.8	2.99	0.9	1.8	1	29	58	29	26	120.5	5.24	0	138.052	4806.5	4762.3	4516.5	4633.2	4295.4	4167	4012	4198	4332.4	4543.8	4515.9	4459.3	4547.5	4532	4341.5	4441.1	4403.6	4409.2	4512.4
Q9VH02	LD30822p OS=Drosophila melanogaster OX=7227 GN=Dmel\CG6293 PE=1 SV=1	1.317	0.359	3.669	1.064	1.402	0.382	6.35634e-05	1.58091e-11	4.34919e-12	0.733495	1.33084e-05	2.75524e-11	639	841.8	229.5	600.6	6.46	7.53	2.69	3.9	1	4	7	4	9	62.4	6.24	0	15.588	614.8	664.2	667.7	583	867	841.8	839.6	718.5	869.1	230.3	218.7	232.6	228.6	582.1	603	598.1	638.2	564	629.3
Q9W2P5	RE43665p OS=Drosophila melanogaster OX=7227 GN=Dmel\CG9344 PE=1 SV=1	1.126	1.081	1.042	1.139	1.282	1.231	6.3594e-05	0.00770028	0.0834871	1.41215e-05	6.62257e-09	1.33145e-07	1644.1	1850.6	1776.8	1443.2	1.06	2.29	3.95	1.1	1	4	10	4	56	9	9.2	0	19.955	1645.6	1672.3	1630.8	1642.7	1880.2	1850.6	1804.2	1788.3	1877.9	1678.8	1735.1	1819.5	1822.4	1437.1	1449.4	1457.1	1420.9	1509.6	1584.5
Q9VJ59	PRA1 family protein OS=Drosophila melanogaster OX=7227 GN=Jwa PE=1 SV=6	1.137	1.09	1.044	0.995	1.132	1.085	6.36602e-05	0.00571392	0.11228	0.971996	0.000127765	0.0125411	1472.8	1674.7	1604.7	1479.7	3.4	2.37	3.38	1.81	1	4	19	4	28	22.8	9.89	0	36.956	1414	1493.5	1529.4	1452.3	1674.7	1655.1	1727.8	1620.2	1685.1	1534.5	1570.3	1644.6	1639.9	1464.5	1460.6	1517.6	1495	1297.2	1415.2
Q0KHR3	Bazooka, isoform B OS=Drosophila melanogaster OX=7227 GN=baz PE=1 SV=1	0.83	0.947	0.877	0.999	0.829	0.946	6.38015e-05	0.101109	0.00548187	0.972838	0.000127089	0.20252	830.6	689.8	786.8	831.7	5.76	4.65	3.16	1.7	1	14	17	14	12	163.5	8.85	0	38.783	911.1	805.5	811.1	850.7	670.9	740.2	689.8	726.2	668.8	800.6	807.5	773.2	754.1	835.9	851.4	818	827.6	835.8	763.2
Q9VFF3	Exosome complex component 10 homolog OS=Drosophila melanogaster OX=7227 GN=Rrp6 PE=1 SV=3	0.824	0.912	0.903	1.179	0.971	1.075	6.49997e-05	0.0356111	0.0175154	0.000356703	0.865673	0.0897076	2639	2173.9	2406.7	2239.2	3.75	5.42	2.58	0.86	1	27	47	27	31	102.9	9.25	0	115.793	2685.5	2665.2	2468.6	2613	2173.9	2146.9	2080.2	2397.2	2217	2429.4	2384.3	2325.2	2469.9	2224.4	2240.4	2270.2	2237.9	2463.6	2525.3
Q9VKI0	CENP-meta, isoform C OS=Drosophila melanogaster OX=7227 GN=cmet PE=1 SV=3	1.413	1.29	1.095	0.885	1.25	1.142	6.50091e-05	0.00290504	0.217169	0.171704	0.00304738	0.149946	5547.7	7837.7	7157.4	6269.9	5.62	7.82	3.68	10.93	1	72	128	69	32	251.3	5.19	0	313.143	5314.5	5477.8	6050.5	5618.5	7817.8	7837.7	8106.7	7081.1	8804.5	7382.6	6829	7319	6999.3	6785.9	5700.9	5793.1	7069.8	4875.3	5190.3
P24785	Dosage compensation regulator mle OS=Drosophila melanogaster OX=7227 GN=mle PE=1 SV=2	0.919	1.069	0.859	0.895	0.822	0.957	6.54835e-05	0.0010114	9.36935e-08	4.92995e-06	3.47378e-09	0.0163142	2803.2	2575.5	2996.8	3131.8	3	2.17	0.49	0.96	1	37	66	37	33	143.6	7.23	0	177.087	2757.4	2864.6	2686.3	2849.7	2575.5	2501.5	2485.3	2614.1	2580.8	2997.3	2971	2996.3	3004.1	3141.6	3122.1	3185.7	3121.1	2529.5	2714.2
Q95SP2	E3 ubiquitin-protein ligase HRD1 OS=Drosophila melanogaster OX=7227 GN=sip3 PE=1 SV=1	0.872	0.998	0.873	0.976	0.85	0.974	6.56271e-05	0.918465	2.46011e-05	0.2696	4.02469e-06	0.592015	678	591.1	676.7	695	2.81	3.23	2.5	2.76	1	8	16	8	12	69.2	6.1	0	40.449	674.5	681.6	642.6	682.5	579.8	559.4	591.1	601.7	606.9	661.9	669.9	700.6	683.7	675.8	691.1	721.9	699	618.8	645.8
Q9W314	GH14088p OS=Drosophila melanogaster OX=7227 GN=Ser7 PE=2 SV=1	0.493	0.644	0.766	0.925	0.456	0.595	6.5679e-05	0.00180426	0.330453	0.999953	6.07046e-05	0.00165346	61.1	30.2	39.4	66.1	9.91	15.19	8.51	18.62	1	1	1	1	2	43.6	7.33	0.005	2.511	57	61.7	60.6	71.5	30.2	29.6	36.8	40.3	29.3	38.2	42.5	40.6	34.8	47.5	62.7	74.8	69.7	52.3	58.5
Q9VB08	E3 ubiquitin-protein ligase RING1 OS=Drosophila melanogaster OX=7227 GN=Sce PE=1 SV=1	1.344	0.816	1.646	1.037	1.393	0.846	6.64759e-05	0.000817014	8.31651e-08	0.941884	2.78885e-05	0.00216496	353.4	474.9	288.5	340.8	3.76	7.77	4.4	6.39	1	6	8	6	17	47.2	7.12	0	32.464	352.2	354.5	376.8	346	429	500	509.1	435.4	474.9	293.3	299.6	270.6	283.7	382.4	342.4	339.3	333.4	323.1	335.9
Q03017	NF-kappa-B inhibitor cactus OS=Drosophila melanogaster OX=7227 GN=cact PE=1 SV=2	1.186	0.938	1.264	1.043	1.237	0.979	6.65191e-05	0.039541	9.35009e-07	0.392659	5.91511e-06	0.505076	1292.3	1533.3	1212.7	1239.1	3.48	4.57	3.28	1.92	1	10	20	10	28	53.8	4.84	0	76.004	1320.7	1264.5	1338.5	1243.7	1528.4	1580.9	1533.3	1405	1567.8	1135.9	1213.6	1217.3	1211.9	1249.6	1228.7	1265.3	1210.9	1211.5	1198.1
Q8MSX1	Protein encore OS=Drosophila melanogaster OX=7227 GN=enc PE=1 SV=2	0.905	0.963	0.94	0.956	0.865	0.92	6.67057e-05	0.336777	0.00134754	0.153944	2.5221e-06	0.00679427	4511.9	4082.8	4342.9	4719.7	1.91	3.67	1.71	2.48	1	29	59	29	18	188.5	8.63	0	162.864	4486.7	4627.4	4423.1	4537.3	4157.3	3826.9	3867.4	4084.1	4082.8	4319.1	4356	4329.8	4481.2	4773.7	4666.3	4847.2	4581.9	4115.9	4384.5
Q9W0R6	Probable G-protein coupled receptor Mth-like 9 OS=Drosophila melanogaster OX=7227 GN=mthl9 PE=2 SV=1	0.537	0.779	0.689	0.893	0.479	0.695	6.73747e-05	0.104757	0.0056244	0.65727	1.15919e-05	0.0130102	58.2	31.2	45.3	65.2	9.12	16.84	11.86	9	1	1	1	1	2	59	8.68	0.004	2.633	60	56.4	50.5	62.5	29.1	31.2	34.4	42.3	28.7	43.6	40.8	53.6	47	55.2	64.2	68.2	66.1	55	53.4
Q9W408	GH10083p OS=Drosophila melanogaster OX=7227 GN=Dmel\CG3823 PE=2 SV=1	0.772	1.062	0.727	1.08	0.833	1.147	6.75204e-05	0.552316	9.00304e-06	0.281425	0.00173286	0.0294419	485.4	374.5	515.4	449.5	3.67	9.75	2.87	4.29	1	4	5	4	14	34.1	7.33	0	12.439	461.2	504.5	487.1	483.6	359.1	302.1	374.5	382.2	390.3	513.7	496.3	532.3	517	416.8	460.7	447.3	451.7	423.1	478
Q9VMK2	MIP15303p OS=Drosophila melanogaster OX=7227 GN=Dmel\CG13992 PE=2 SV=1	1.234	1.153	1.071	0.889	1.097	1.025	6.77631e-05	0.00177359	0.344611	0.00623461	0.110556	0.894119	477.4	589.3	550.3	537	5.41	4.55	2.6	4.8	1	6	8	6	10	70.7	5.08	0	29.337	483.6	498.1	471.3	438	612.2	561.8	591.1	545.3	589.3	535.2	564	540.3	560.4	570.7	507.8	539.9	534.2	443.6	471.9
Q9VZY0	LD45195p OS=Drosophila melanogaster OX=7227 GN=Non2 PE=1 SV=1	0.841	0.84	1.002	1.159	0.975	0.973	6.7898e-05	5.35233e-05	0.949175	0.00076774	0.622207	0.376973	2449.7	2060.6	2056.6	2113.6	2.65	2.35	4.31	6.09	1	7	18	7	34	27.5	6.32	0	40.89	2548.8	2423.7	2402.3	2476	2061.1	2036.8	1979.3	2112.3	2060.6	1892.4	2050.2	2080.8	2062.9	2135	2092.4	2285.8	1973.2	2338.1	2296.5
Q9VJ31	CG10623 protein OS=Drosophila melanogaster OX=7227 GN=Bhmt PE=1 SV=1	0.79	0.926	0.854	1.021	0.807	0.945	6.78984e-05	0.199657	0.00267804	0.781846	0.000324976	0.655585	1107.3	875.2	1025	1084.2	5.3	7.64	3.9	1.24	1	10	19	10	37	36.7	5.11	0	57.784	1201.8	1137.1	1078.2	1076.1	981.5	845.9	805.3	875.2	916.7	1007.2	1008.2	1093.3	1042	1098.9	1083.2	1066.1	1085.3	1102.5	1077.4
Q9V3V0	Serine/arginine-rich splicing factor x16 OS=Drosophila melanogaster OX=7227 GN=x16 PE=1 SV=1	0.858	0.989	0.868	1.011	0.867	0.999	6.79048e-05	0.937264	0.000173973	0.839274	0.000266947	0.994014	4226.3	3626.1	4177.7	4180.4	6.16	1.47	2.98	2.75	1	22	58	22	58	27.9	11.56	0	111.055	4145.4	4616.9	4005.4	4308.8	3540.1	3626.1	3601.5	3682.9	3643.4	4170.3	4185.2	4077.7	4375.9	4242	4119.7	4042.9	4295.4	3802.8	4374.5
Q9V3A7	Structural maintenance of chromosomes protein OS=Drosophila melanogaster OX=7227 GN=glu PE=1 SV=1	1.204	1.125	1.07	0.966	1.163	1.087	6.80708e-05	0.00137242	0.422274	0.458138	0.000888005	0.020912	6340.9	7633.8	7136	6562.1	2.07	3.71	5.33	3.88	1	51	96	51	38	159.8	6.15	0	242.589	6190.5	6297.3	6384.7	6499.7	7727.9	7608	7633.8	7090.2	7803.6	7838.7	6970.5	7104.2	7167.8	6701.7	6393.5	6425.5	6939.9	5678.9	5966.8
Q59DP9	Calcium-transporting ATPase OS=Drosophila melanogaster OX=7227 GN=PMCA PE=1 SV=3	1.149	0.898	1.279	0.95	1.091	0.853	6.84011e-05	0.00501253	2.55268e-07	0.0848277	0.00725429	6.23715e-05	5460.5	6273.4	4903.4	5748.3	3.39	5.28	1.1	2.25	1	33	86	33	27	138.6	7.53	0	201.215	5491.4	5624.1	5429.8	5184.6	6418.7	6201	6056.9	6273.4	6930.7	4945.6	4818.1	4898.9	4907.9	5986.7	5783.4	5709.1	5713.4	5037.6	5328.9
A0A6H2EG35	Nuak1 ortholog, isoform M OS=Drosophila melanogaster OX=7227 GN=Nuak PE=4 SV=1	1.11	0.938	1.184	0.996	1.106	0.934	6.86828e-05	0.0264099	7.32193e-07	0.899886	0.000212196	0.00752337	1476.8	1639.6	1384.6	1482.3	2.66	2.16	2.24	3.3	1	27	34	27	11	302.7	9.47	0	90.713	1411	1473.1	1480.6	1502	1628.1	1639.6	1644.7	1712	1625.3	1413.5	1377.4	1340	1391.8	1543.4	1458.8	1433.6	1506.2	1294.4	1395.8
A1Z971	Uncharacterized protein, isoform A OS=Drosophila melanogaster OX=7227 GN=dRNF34 PE=1 SV=1	1.19	1.233	0.965	0.883	1.051	1.089	6.86953e-05	2.24894e-05	0.65408	0.0043192	0.159616	0.0282738	199.8	237.8	246.3	226.3	5.55	2.18	2.77	5.28	1	7	8	7	15	77.1	5.77	0	27.338	183.2	209.4	197.9	201.8	234.4	237.8	241.2	233.9	246.5	239.3	254.7	243.1	249.5	209.8	232.7	235.4	220	168.1	198.4
P55824	Probable ubiquitin carboxyl-terminal hydrolase FAF OS=Drosophila melanogaster OX=7227 GN=faf PE=1 SV=2	1.159	1.018	1.139	0.978	1.134	0.996	6.91891e-05	0.635357	0.000521083	0.579693	0.000616325	0.999678	16386.9	18997	16679.3	16748.6	0.87	2.8	2.92	4.51	1	79	219	79	32	310.9	6.05	0	478.085	16282.1	16492.4	16509	16232.5	18386.3	18997	19373.1	18120.3	19127.9	17503.3	16385.3	16803.1	16556.4	17150.6	16356	16124.1	17784	14936.5	15626.8
Q9VKJ3	Nuclear pore complex protein Nup160 homolog OS=Drosophila melanogaster OX=7227 GN=Nup160 PE=1 SV=1	1.114	1.108	1.005	0.91	1.014	1.009	6.92767e-05	0.000186295	0.98954	0.000469111	0.802923	0.940117	6789.4	7564.7	7525.1	7460.6	0.81	1.99	1.43	3.85	1	33	84	33	26	160.2	5.36	0	184.906	6788.8	6885.6	6790.1	6759.2	7564.7	7519	7709.5	7323.1	7661.8	7530.1	7381.8	7645.4	7520	7650.7	7275.2	7148.1	7741.7	6227.7	6524.2
Q0KI00	Aminopeptidase OS=Drosophila melanogaster OX=7227 GN=SP1029 PE=1 SV=1	1.299	1.112	1.168	0.867	1.126	0.964	6.94792e-05	0.119737	0.00501452	0.0463831	0.0143047	0.945988	4433.3	5758.1	4929.8	5114	4.68	7.72	4.27	5.9	1	28	61	27	32	108	6.6	0	154.576	4285.6	4340.8	4748.7	4527.8	5758.1	5613	6133.5	5348.9	6504	5030.9	4746.7	5219.8	4830.7	5236.7	4994.2	4693.8	5377.1	3931.4	4113
P48601	26S proteasome regulatory subunit 4 OS=Drosophila melanogaster OX=7227 GN=Rpt2 PE=1 SV=2	1.082	1.168	0.926	0.907	0.981	1.06	6.97639e-05	4.33458e-08	5.42519e-05	1.55893e-05	0.488222	0.000877123	11418.1	12351.1	13339.9	12584.7	0.25	1.21	1.48	2.99	1	29	145	27	64	49.3	6.58	0	220.655	11427	11385.9	11454.2	11409.3	12307.1	12351.1	12594.2	12183.3	12352.1	13671.6	13261.7	13418.6	13243.7	12900.3	12215.6	12280.6	12896.3	10482.7	10788.3
Q8SY39	RNA helicase OS=Drosophila melanogaster OX=7227 GN=CG6994 PE=1 SV=1	0.821	0.968	0.848	1.015	0.833	0.982	7.0798e-05	0.725244	0.00040695	0.846547	0.000271837	0.995279	7189.2	5903.9	6960.5	7085.7	4.92	4.56	3.54	3.88	1	32	66	32	38	93.3	9.72	0	147.345	7647.1	7253.2	6790.1	7125.8	6031.5	5903.9	5568.3	6310	5845.6	6840.4	7266.4	6712.9	7082.7	6968.1	7265.2	7205.3	6665.1	7015.1	6872.5
Q23978	Unconventional myosin ID OS=Drosophila melanogaster OX=7227 GN=Myo31DF PE=1 SV=1	1.148	1.007	1.139	1.069	1.227	1.077	7.10125e-05	0.998206	9.30837e-05	0.0672181	1.42077e-06	0.0498862	2269.5	2604.5	2286.1	2122.6	2.34	4.7	3.41	0.93	1	31	50	30	37	117	9.42	0	164.903	2192.1	2263.5	2275.5	2319.7	2566.2	2500.4	2604.5	2828.9	2636	2165.4	2289.8	2350.9	2282.4	2096.3	2122.1	2123	2144.3	2010.9	2144.7
Q9VET3	peptidyl-tRNA hydrolase OS=Drosophila melanogaster OX=7227 GN=Dmel\CG14903 PE=4 SV=1	1.164	0.975	1.194	1.082	1.26	1.055	7.10729e-05	0.722458	1.43209e-05	0.0255431	7.34945e-07	0.159991	492.3	573.1	480	455	2.35	2.58	4.49	2.82	1	1	3	1	6	13.5	7.11	0.003	2.766	500.2	500.2	477.3	484.5	575.4	554	546.1	579.3	573.1	505.3	452.6	479.1	480.9	462.2	470.6	448	442.5	458.9	473.9
X2JEY5	AMP deaminase OS=Drosophila melanogaster OX=7227 GN=AMPdeam PE=1 SV=1	1.112	1.475	0.754	0.963	1.071	1.421	7.11277e-05	5.27416e-11	1.58156e-09	0.400784	0.00113792	1.39735e-10	5412.4	6020	7984.4	5620.8	2.28	1.75	0.99	3.86	1	28	68	27	36	91.5	6.1	0	166.736	5459.6	5365.7	5578.6	5292.9	5940.9	5990.3	6091.5	6020	6213.9	7871.4	8006.4	8057.8	7962.5	5725.8	5517.7	5301.2	5770.7	5008.4	5084
Q9VNW1	LD30543p OS=Drosophila melanogaster OX=7227 GN=Dmel\CG7133 PE=2 SV=2	0.913	1.048	0.871	1.074	0.981	1.126	7.11303e-05	0.0662528	1.40803e-06	0.00351545	0.200276	3.77685e-05	1899	1734.5	1990.6	1767.5	1.28	2.05	3.45	1.19	1	10	16	10	28	38.3	10.15	0	45.31	1893.4	1926.6	1868.2	1904.5	1689.4	1740.1	1758.6	1734.5	1676.2	2042.4	2036.4	1903.8	1945.7	1758	1802.2	1757.1	1777	1736.9	1825.4
O61305	DEAD-box helicase Dbp80 OS=Drosophila melanogaster OX=7227 GN=Dbp80 PE=1 SV=1	0.708	1.204	0.588	1.03	0.73	1.24	7.13038e-05	0.00186152	1.43445e-07	0.998232	5.46827e-05	0.00250395	3277.7	2322.1	3946.7	3182.5	5.21	3.47	5.53	11.42	1	21	45	21	47	51.3	6.8	0	107.908	3267.3	3288.3	3336.5	2967.3	2386.5	2289.9	2318.4	2322.1	2494.5	3952.4	3895.1	4373.8	3941	3724.1	2912.4	3003.8	3371.9	2997.3	3115.7
Q9W3W6	Small ovary, isoform A OS=Drosophila melanogaster OX=7227 GN=sov PE=1 SV=2	1.27	0.903	1.405	1.009	1.281	0.911	7.13719e-05	0.361075	5.75224e-06	0.983925	0.0001269	0.217527	815.2	1035	736.4	808.2	4.97	4.75	5.95	6.37	1	24	30	24	9	371.1	7.77	0	81.48	811.4	844.5	819	750	1051	1035	1026.2	957.8	1093.1	821.8	741.3	731.5	725.8	885.5	785.9	769	831	744.4	800.1
Q4V5V6	GEO10744p1 OS=Drosophila melanogaster OX=7227 GN=Ilp8 PE=2 SV=1	1.476	1.01	1.462	1.013	1.495	1.022	7.25906e-05	0.865333	0.000259953	0.999669	6.23485e-05	0.82084	228.6	337.5	230.8	225.7	8.07	7.78	6.87	12.41	1	2	3	2	13	17.8	9.1	0	7.655	199.6	223.4	241.1	233.8	328	354.2	300.4	337.5	369.4	259	228.3	222.2	233.3	251.4	210.5	191.5	242	183.1	211.7
Q9VGF7	Glutamate carrier 1, isoform A OS=Drosophila melanogaster OX=7227 GN=GC1 PE=1 SV=1	0.887	0.88	1.007	1.001	0.888	0.881	7.41944e-05	1.89331e-05	0.548808	1	7.30318e-05	1.86729e-05	1644.9	1458.4	1448	1643.2	1.43	3.59	2.12	1.54	1	9	19	9	27	34.5	9.55	0	44.666	1668.2	1655.8	1615.2	1634	1431.6	1458.4	1477.6	1562.1	1436.8	1397.7	1443.5	1452.5	1469.1	1616.6	1658	1671.3	1628.5	1530.3	1568.9
Q7KN85	ATP-citrate synthase OS=Drosophila melanogaster OX=7227 GN=Acly PE=1 SV=1	0.869	1.019	0.853	0.91	0.791	0.927	7.43363e-05	0.641027	1.21708e-05	0.00361827	2.21375e-07	0.031741	15217.2	13228.5	15500	16713.3	0.85	3.74	1.03	3.27	1	47	178	47	49	121.3	7.31	0	311.065	14972.3	15195.5	15243	15238.9	13177	13228.5	13722.7	14172.4	12908.6	15691.7	15594.6	15348.3	15406	15683	16778.2	16824.7	16648.7	13734.9	14397.9
Q9VI56	GEO05313p1 OS=Drosophila melanogaster OX=7227 GN=Dmel\CG1943 PE=1 SV=1	1.647	1.731	0.951	0.88	1.45	1.524	7.50143e-05	4.87458e-05	0.907847	0.319811	0.00165452	0.000850297	1282.7	2113.2	2221	1457.1	7.96	12.49	1.24	15.25	1	5	16	5	62	12.4	9.44	0	31.293	1261.3	1275.6	1485.6	1289.9	2162.3	1993.5	2113.2	1849.9	2561.9	2199.4	2206.9	2259.7	2235.2	1837.9	1352.7	1343.6	1569.6	1157	1208.6
Q9W4U2	RH09070p OS=Drosophila melanogaster OX=7227 GN=BcDNA:RH09070 PE=1 SV=2	1.087	1.11	0.979	0.938	1.019	1.041	7.59599e-05	9.37484e-06	0.271829	0.00226193	0.313255	0.017178	2814.5	3058.4	3124.8	3001.7	2.97	1.21	1.76	2.22	1	9	23	9	43	26.2	7.8	0	62.73	2804.1	2824.9	2863	2672.2	3124	3047.7	3025.1	3058.4	3071.6	3231.2	3113.8	3122.9	3126.8	2907.2	3040.9	2963.1	3044.9	2572.4	2676.6
Q9VGF3	IP11040p OS=Drosophila melanogaster OX=7227 GN=Dmel\CG18547 PE=1 SV=1	1.322	0.629	2.102	0.88	1.163	0.553	7.60717e-05	3.30901e-07	7.02687e-10	0.0545136	0.0134018	1.97389e-08	2563.3	3388.3	1611.7	2913.6	2	8.32	3.92	6.99	1	11	19	11	33	38.8	6	0	46.809	2492.7	2556.9	2569.7	2616.9	3115.5	3388.3	3705.6	3600.7	3077.9	1602.8	1620.7	1504.9	1648.6	2668.1	3117	3021.1	2810	2286.7	2422.7
Q27594	Cytochrome P450 6a9 OS=Drosophila melanogaster OX=7227 GN=Cyp6a9 PE=2 SV=3	1.489	1.07	1.392	1.031	1.535	1.103	7.62521e-05	0.693944	0.000485973	0.997421	5.63647e-05	0.582566	120.4	179.4	128.9	116.9	10.89	6.31	6.74	11.83	1	8	11	8	18	58	7.69	0	38.934	108.2	127.7	137.3	113.6	180.6	178.7	179.4	168.1	199.7	122.2	140.4	134.5	123.5	140.4	118.9	114.9	107.2	99.3	121
Q9VN03	ATP-dependent RNA helicase SUV3 homolog, mitochondrial OS=Drosophila melanogaster OX=7227 GN=Suv3 PE=2 SV=3	0.813	0.863	0.942	1.129	0.917	0.974	7.808e-05	0.00405406	0.1935	0.0287582	0.027413	0.709333	849.4	690.5	733	752.6	3.12	3.42	2.2	7.59	1	6	8	6	10	86.6	7.68	0	28.943	846	806.4	852.8	868.2	726.9	692.1	665.3	690.5	673.9	726.1	755.7	719.2	740	713.7	828.1	793.5	713.8	776.1	764
Q9TVM2	Exportin-1 OS=Drosophila melanogaster OX=7227 GN=emb PE=1 SV=1	0.934	1.083	0.863	0.995	0.93	1.078	7.84627e-05	1.38981e-05	7.35212e-09	0.571703	1.07858e-05	9.35347e-05	11915.3	11133.9	12904.6	11973	1.13	1.11	1.25	2.13	1	45	163	45	49	122.7	5.87	0	318.945	11939.2	11891.4	11675.6	11974.7	10931.3	11133.9	11102.5	11249.4	11213	13011.8	12872.4	12936.9	12639.6	12090.9	11810.3	11856.2	12369.9	10952.5	11267.3
Q9VX32	Rho GTPase-activating protein 190 OS=Drosophila melanogaster OX=7227 GN=RhoGAPp190 PE=1 SV=2	1.086	0.952	1.141	1.06	1.151	1.009	7.85913e-05	0.021337	7.04174e-07	0.00361827	2.30027e-07	0.765374	2697.3	2929.1	2568.2	2545.2	0.93	2.96	1.14	1.61	1	31	44	31	22	178.7	5.57	0	119.637	2677.2	2680.3	2727.5	2714.3	2929.1	2921.3	2938.8	2849.1	3087.8	2560.1	2618.8	2553	2576.3	2515.2	2575.5	2500.8	2580.5	2455.9	2539.6
Q7PLI2	Nipped-B protein OS=Drosophila melanogaster OX=7227 GN=Nipped-B PE=1 SV=3	1.137	1.156	0.984	0.861	0.979	0.995	7.90675e-05	3.65076e-05	0.800654	1.24424e-05	0.35588	0.869229	2246.7	2555.5	2597.9	2610.1	2.75	2.1	1.58	4.48	1	28	40	27	16	236.6	6.57	0	105.765	2195.5	2341.3	2261.9	2231.6	2511.3	2557.2	2555.5	2545.2	2655.4	2664.8	2617.9	2578	2578	2653.2	2567	2567.8	2819.7	2014	2218.4
Q9VEP2	Uncharacterized protein, isoform B OS=Drosophila melanogaster OX=7227 GN=Dmel\CG18213 PE=4 SV=4	0.697	0.906	0.769	1.003	0.699	0.909	7.94859e-05	0.141457	0.00485775	0.999854	7.07604e-05	0.12548	87.5	61	79.3	87.2	3.29	7.41	9.59	7.2	1	3	4	3	5	100.9	5.58	0	15.386	92.3	88.4	85.7	86.6	67.6	61	60.1	70.4	60.7	87.1	79.6	78.9	68.7	97.6	82.7	86.1	88.4	84.6	83.7
Q9VCB7	NFX1-type zinc finger-containing protein 1 OS=Drosophila melanogaster OX=7227 GN=GH20028p PE=4 SV=1	1.068	0.988	1.081	0.982	1.048	0.97	7.96843e-05	0.600654	1.17362e-05	0.63466	0.000610589	0.11265	943.7	1007.4	931.9	961	0.39	1.6	0.99	2.3	1	9	19	9	11	102.7	7.01	0	27.893	940.7	949.4	943.8	943.5	1015.7	1035.2	1007.4	1001.8	992.5	938.1	922.2	925.7	940.9	977.3	952.2	969.9	927.7	862.9	899.6
Q9V9K7	Serrate RNA effector molecule homolog OS=Drosophila melanogaster OX=7227 GN=Ars2 PE=1 SV=2	0.873	0.946	0.923	1.054	0.921	0.998	8.03185e-05	0.0516244	0.015177	0.0686565	0.0111199	0.998423	11499.2	10044.5	10883	10908.1	2.16	2.93	1.98	4.21	1	54	132	54	50	107.2	5.55	0	285.312	11896.9	11494.8	11302.6	11503.6	10044.5	9968.9	9807.2	10583.1	10224.9	10601.1	11106.2	10810.7	10955.8	10584.5	11241.6	11365.8	10451	10913.7	10891.5
Q9VXP1	RING-type E3 ubiquitin transferase OS=Drosophila melanogaster OX=7227 GN=sordd1 PE=1 SV=1	0.776	0.968	0.802	0.925	0.717	0.895	8.066e-05	0.969884	0.000166461	0.38165	6.77619e-06	0.203076	437.8	339.6	423.6	473.5	4.97	8.4	3.92	5.05	1	6	13	6	31	30.3	5.9	0	27.064	452.7	441.3	402.5	434.3	344.3	339.6	313.5	357.7	288.5	441.9	407.7	412.8	434.7	430.9	474	473.1	483.6	415.3	418.2
Q9VBA0	GH09623p OS=Drosophila melanogaster OX=7227 GN=Dmel\CG6330 PE=1 SV=2	0.759	0.826	0.919	1.032	0.784	0.853	8.06958e-05	0.0011956	0.530053	0.868458	0.000287527	0.00463701	622.4	472.5	514.2	602.9	5.32	7.93	5.01	5.24	1	9	16	9	26	41.3	6.95	0	37.536	670	640.9	598.7	604.4	472.5	490.6	470	528.5	423.9	522.1	508.7	467.7	519.8	583.5	645.3	623	579.2	614.7	607.3
Q5LJX8	Zydeco, isoform F OS=Drosophila melanogaster OX=7227 GN=zyd PE=3 SV=3	0.716	0.924	0.775	0.959	0.687	0.886	8.12866e-05	0.826737	0.00033886	0.950591	3.54771e-05	0.529574	301.3	215.8	278.4	314.3	5.84	9.41	11.02	7.34	1	2	2	2	7	58.4	7.06	0	7.001	293	332.6	306.2	296.5	197.4	215.8	181.7	229.3	223.8	340.1	283.9	272.9	272.6	304.1	324.7	346.5	294	268.8	315.2
Q7K3D4	peptidylprolyl isomerase OS=Drosophila melanogaster OX=7227 GN=zda PE=1 SV=1	0.909	0.996	0.912	0.856	0.778	0.853	8.18744e-05	0.954542	0.000190157	3.6933e-06	3.24096e-09	1.95793e-06	6300.5	5724.3	6276.3	7356.6	1.94	2.61	1.2	3.36	1	19	67	19	50	44.8	5.33	0	124.87	6466.8	6188.2	6248.6	6352.8	5496.1	5741.9	5724.3	5838	5525.5	6320.9	6312.2	6240.5	6158.8	7577.5	7150.4	7138.4	7568.6	5932.3	5863.4
Q9VQM0	Toucan, isoform A OS=Drosophila melanogaster OX=7227 GN=toc PE=4 SV=2	1.177	1.078	1.091	0.957	1.126	1.032	8.19444e-05	0.0272481	0.0307362	0.644073	0.000612088	0.209363	2246.8	2643.7	2422.9	2347.9	4.23	1.75	4.21	3.31	1	45	55	45	25	234	8.76	0	168.205	2148.7	2245.6	2247.9	2381.1	2631.7	2643.7	2653	2545.8	2656	2572.7	2471.6	2375.1	2346	2377.2	2210.7	2327.1	2369	1971.1	2127.8
Q06559	Small ribosomal subunit protein uS3 OS=Drosophila melanogaster OX=7227 GN=RpS3 PE=1 SV=1	0.861	0.944	0.912	0.98	0.843	0.925	8.20465e-05	0.0610799	0.0129673	0.999999	8.02576e-05	0.0596171	31338.7	26978	29589.1	31988.6	4.92	3.36	3.09	2.82	1	23	173	23	81	27.5	9.39	0	139.388	33610.2	30283.1	30521.1	32178.1	28014.9	27469.2	26978	26424.2	25690.2	30071.9	30237.1	28285.2	29114	30314.9	31968.7	32269.8	32008.5	30832.5	28693.6
Q95T08	LD29354p OS=Drosophila melanogaster OX=7227 GN=Dmel\CG9636 PE=2 SV=1	1.368	0.855	1.6	1.079	1.476	0.923	8.20743e-05	0.0425414	1.15453e-06	0.594206	1.18617e-05	0.338207	49.7	67.9	42.5	46	7.49	5.25	8.97	4.47	1	2	2	2	5	34.3	5.12	0	5.227	44.9	53.2	48	51.4	69.7	61	67.9	65.5	68.9	39.4	45.5	39.6	46.7	45.3	44.4	49.2	46.8	41.2	50.4
Q9VSZ1	GH05942p OS=Drosophila melanogaster OX=7227 GN=DmTOM1 PE=1 SV=2	1.134	1.106	1.026	0.916	1.039	1.013	8.21469e-05	0.00110388	0.564952	0.00319177	0.251862	0.92906	1909.9	2166.5	2111.9	2085.6	3.05	2.79	2.11	1.83	1	13	34	13	31	57.6	4.87	0	74.704	1871.6	1873.1	1947.4	1990.8	2205.8	2059	2194.3	2166.5	2123.5	2040.6	2143	2123.1	2100.7	2029.6	2100.3	2116	2071	1717	1774.8
Q9VCY1	RRM domain-containing protein OS=Drosophila melanogaster OX=7227 GN=Dmel\CG6937 PE=1 SV=1	0.844	1.011	0.835	1.006	0.849	1.017	8.23904e-05	0.940849	3.40145e-05	0.996204	0.000117162	0.861462	6017.5	5079.5	6085.1	5982.5	2.94	4.04	2.27	3.19	1	12	51	12	35	39.5	9.77	0	79.024	6155.9	6154.5	5822.2	5883.6	5361	5028.9	5039.1	5483.8	5079.5	6035.9	6134.6	5915.5	6239.2	5864.8	6166.3	6102.5	5765	5647.1	5831.4
Q7JX82	GH21964p OS=Drosophila melanogaster OX=7227 GN=kermit PE=1 SV=1	1.39	1.573	0.884	0.836	1.162	1.315	8.27478e-05	3.33993e-06	0.0632136	0.0184871	0.046576	0.000535321	60.6	84.2	95.3	72.5	8.91	4.72	5.47	8.23	1	2	3	2	7	36.8	6.3	0	6.48	69.6	57.9	63.4	58	87.2	82.5	84.2	78.5	88.6	102.4	96.8	90	93.8	74.9	81.5	67.8	70.2	63.8	54.9
A1Z6N4	MIP05841p OS=Drosophila melanogaster OX=7227 GN=Tdc2 PE=2 SV=1	1.55	1.129	1.373	0.754	1.169	0.851	8.27868e-05	0.283403	0.00217598	0.00288119	0.277052	0.0853867	64.3	99.8	72.7	85.4	8.35	7.91	2.71	12.49	1	3	4	3	4	72	7.11	0	5.913	66.7	62.1	61.2	73.2	99.8	87	89.2	100.9	104.1	73	72.2	76.5	72.4	90.6	80.5	75.5	99.8	61.2	58.9
Q9VD02	GH14779p OS=Drosophila melanogaster OX=7227 GN=Dmel\CG7054 PE=1 SV=1	1.531	1.027	1.491	1.57	2.404	1.612	8.28992e-05	0.99487	5.6565e-05	2.32963e-05	1.05253e-08	3.28669e-05	1014	1552.5	1041	645.9	12.93	8.07	9.13	3.47	1	7	16	7	47	19.8	5.21	0	39.197	1051.5	934.5	1242	977.8	1578.6	1538.6	1552.5	1379.3	1732.3	920.9	990.5	1094.1	1125.7	635.5	684	655.1	636.8	964.6	885.4
Q24311	Cullin homolog 1 OS=Drosophila melanogaster OX=7227 GN=Cul1 PE=1 SV=2	0.898	1.027	0.874	1.006	0.903	1.034	8.30512e-05	0.33883	6.13605e-06	0.971524	0.000169123	0.178846	6238.2	5599.2	6408.7	6197.9	1.9	3.15	1.16	2.2	1	30	65	30	43	89.5	7.9	0	180.084	6307.2	6317	6070.5	6169.9	5541.8	5599.2	5628.6	5886.9	5401.2	6470.4	6408	6292.9	6409.4	5986	6182.2	6213.6	6308.9	5786	5985.4
Q9VB05	ALG-2 interacting protein X OS=Drosophila melanogaster OX=7227 GN=ALiX PE=1 SV=1	1.151	1.038	1.109	0.978	1.126	1.015	8.35238e-05	0.429786	0.00123348	0.782431	0.000406048	0.923145	9383.5	10803.3	9740.5	9596.8	1.31	2.46	2.43	5.7	1	34	88	34	34	92.5	5.45	0	179.505	9343.1	9481.1	9424.1	9199.3	10749.2	10803.3	11238.1	10534.3	11004.8	9928.7	9452.1	9901.7	9581.8	9986.4	9222.3	9014.5	10112.7	8570.9	8983.5
Q9VD07	Nucleolar pre-ribosomal-associated protein 1 OS=Drosophila melanogaster OX=7227 GN=Dmel\CG12499 PE=1 SV=2	0.872	1.01	0.863	0.965	0.842	0.975	8.37023e-05	0.938174	3.40437e-05	0.243114	4.49219e-06	0.515098	6261.1	5458.7	6323.5	6486.6	3.4	3.74	1.71	1.48	1	51	96	51	26	237	6.76	0	245.107	6473.2	6396.5	6026.2	6128.5	5566.6	5458.7	5379.7	5844.5	5321.7	6266.3	6448.5	6209.8	6381.2	6642.9	6487	6486.1	6415	5938.2	6060.8
Q9I7L8	Cell division cycle 23, isoform A OS=Drosophila melanogaster OX=7227 GN=Cdc23 PE=2 SV=2	1.13	1.246	0.907	0.798	0.902	0.994	8.37361e-05	4.74861e-08	5.28036e-05	3.60491e-08	3.35008e-05	0.990719	1643.7	1857.1	2047.4	2059.5	1.03	2.77	1.82	3.37	1	15	28	15	27	77.5	6.51	0	81.308	1642.1	1630.4	1670.8	1645.3	1804	1857.1	1859.8	1768.1	1897.3	2051.8	2042.9	2112.8	2027.3	2086.2	2033	2000	2160	1506.4	1544.8
Q9VJD2	Ragulator complex protein LAMTOR3 homolog OS=Drosophila melanogaster OX=7227 GN=Lamtor3 PE=1 SV=1	2.278	0.894	2.549	1.441	3.284	1.288	8.39885e-05	0.187089	3.58038e-06	0.0228555	7.74016e-07	0.629984	108.5	247.1	96.9	75.3	11.54	14.87	23.28	4.39	1	3	4	3	22	13.8	5.45	0	12.648	114.5	102.8	129.6	101.9	255.4	238.8	247.1	177.9	269.7	102.5	99.3	58.1	94.6	74.2	70.8	78.5	76.3	105	97.4
Q24114	Division abnormally delayed protein OS=Drosophila melanogaster OX=7227 GN=dally PE=1 SV=1	0.7	0.9	0.778	1.131	0.792	1.018	8.50458e-05	0.215778	0.00317304	0.214814	0.00319064	1	1269.1	888	1141.9	1121.9	2.31	12.2	3.85	4.74	1	8	12	8	15	69	6.4	0	38.341	1251.8	1286.6	1230	1291.5	888	940.4	861.3	1110.2	820.7	1190.6	1137.3	1146.5	1083.8	1111.8	1132.1	1217.8	1097	1148.3	1219.1
Q9VNH2	GM13341p OS=Drosophila melanogaster OX=7227 GN=Dmel\CG2100 PE=1 SV=1	0.932	1.057	0.882	1.047	0.976	1.107	8.52779e-05	0.00444665	2.76432e-07	0.0080384	0.111339	8.91553e-06	5156.8	4806.8	5452.1	4924	2.01	1.29	1.39	2.18	1	23	45	23	43	55.3	9.01	0	94.864	5285.2	5219.5	5065.7	5094.9	4741.3	4806.8	4699.8	4851.9	4818.3	5518.2	5418.1	5347.7	5486.3	5052.6	4902	4793.1	4946.2	4848.5	4945.5
Q9VMI5	CG9135 protein OS=Drosophila melanogaster OX=7227 GN=Dmel\CG9135 PE=1 SV=1	1.269	1.323	0.959	0.907	1.152	1.201	8.55261e-05	2.95021e-05	0.686849	0.112692	0.00688665	0.00150469	4874.8	6187.9	6450.1	5371.7	4.07	7.52	3.66	4.18	1	16	46	16	40	53.4	7.18	0	112.513	4693.7	4842.1	5171.3	4907.7	6151.4	6187.9	6560.3	5535.5	6760	6574.1	6256.5	6774.8	6328.4	5607.8	5196.5	5188.7	5552.8	4305.8	4588
Q23997	Imaginal disk growth factor 6 OS=Drosophila melanogaster OX=7227 GN=Idgf6 PE=1 SV=2	1.28	1.091	1.173	1.1	1.408	1.2	8.55733e-05	0.170567	0.00425185	0.268105	5.00873e-06	0.00568055	5972.4	7647.1	6517.7	5431.2	3.61	11.81	1.82	4.37	1	16	38	15	40	50.3	7.9	0	81.548	5598.1	5916.1	6066.7	6029.2	7515	7993.1	9670.7	7327.4	7647.1	6513.9	6483.1	6521.5	6743.2	5058	5480.8	5382	5608.5	5135.5	5605.6
Q9W0M0	Dodecenoyl-CoA delta-isomerase OS=Drosophila melanogaster OX=7227 GN=Dci PE=1 SV=1	0.866	1.484	0.583	0.92	0.796	1.365	8.6116e-05	1.09946e-09	1.27935e-11	0.0105327	4.77958e-07	2.12252e-08	1331.9	1152.8	1976.1	1448	1.35	2.75	3.55	4.39	1	7	17	7	35	29.2	7.66	0	30.093	1351.3	1315.7	1344.9	1319	1197	1137.6	1152.8	1181.8	1119.1	2028.4	1909.6	2046.9	1925.1	1522.2	1389.3	1407.9	1489.2	1239.6	1246.6
Q9VR96	IP02009p OS=Drosophila melanogaster OX=7227 GN=Obp19c PE=2 SV=1	0.666	0.46	1.446	1.663	1.107	0.766	8.615e-05	1.159e-07	0.000229574	1.41741e-05	0.377029	0.00596162	9110.7	6065.8	4194.1	5478.4	7.47	11.95	4.55	9.83	1	8	32	8	37	19.4	9.07	0	43.38	9600.1	8347.6	8646.3	9700	7071.1	6350.9	6065.8	5634.8	5162.2	4312	3940.5	4333.7	4079.4	5213.4	5756.8	6019.2	4827.2	8806.7	7909.4
Q9GQN5	Transcriptional regulator ATRX homolog OS=Drosophila melanogaster OX=7227 GN=XNP PE=1 SV=2	1.187	1.208	0.983	0.94	1.115	1.135	8.6433e-05	2.08584e-05	0.532893	0.0649396	0.012907	0.00172005	1324.2	1571.3	1599.1	1409.3	1.11	4.93	0.61	4.56	1	24	33	23	20	148.1	8.44	0	86.408	1334.9	1331.7	1316.8	1303	1571.3	1602	1451.6	1489.8	1633.2	1604.6	1611.3	1590.4	1593.5	1504.3	1391.6	1352.1	1427.2	1224.6	1261.8
Q9W4C3	Ubiquitin carboxyl-terminal hydrolase 16/45 OS=Drosophila melanogaster OX=7227 GN=Usp16-45 PE=2 SV=1	0.907	1.014	0.895	1.014	0.92	1.028	8.67405e-05	0.875574	2.69953e-05	0.764319	0.000448852	0.349922	5143.9	4665	5214.5	5072.6	0.9	2.6	2.05	2.77	1	30	78	30	32	121.4	6.58	0	173.47	5140.3	5147.5	5108.2	5217.8	4736.2	4646.5	4479.8	4803	4665	5089.2	5245.8	5183.5	5344.2	4911.7	5117.2	5244.4	5028.5	4715.5	4877.3
Q7JWX3	GH10112p OS=Drosophila melanogaster OX=7227 GN=nec PE=1 SV=1	0.828	0.782	1.059	1.135	0.94	0.888	8.69254e-05	1.62542e-05	0.427051	0.00891706	0.102762	0.0089291	1475.6	1222	1154.3	1300.2	5.57	5.5	1.49	4.21	1	13	25	13	43	53.7	7.36	0	82.401	1393.8	1509.7	1442.3	1583.6	1161.7	1222	1236.7	1299.5	1129.4	1128.3	1169.4	1152	1156.7	1277.1	1250.2	1323.6	1375.4	1278.7	1430.4
Q9VRG8	GH01474p OS=Drosophila melanogaster OX=7227 GN=Dmel\CG1486 PE=1 SV=1	0.853	0.82	1.04	1.008	0.86	0.826	8.80461e-05	6.78744e-06	0.158194	0.987476	0.00015009	1.04775e-05	1586.1	1352.3	1299.9	1572.8	3.18	3.82	3.25	1.91	1	15	32	15	21	91.5	5.27	0	84.944	1629.1	1624	1549	1531.5	1335.2	1433.8	1352.3	1432.2	1327.7	1369.6	1316.9	1283.1	1276.1	1604.6	1585.5	1560.2	1535.7	1494.5	1538.8
D0UGE6	Tenectin isoform 1 OS=Drosophila melanogaster OX=7227 GN=tnc PE=2 SV=1	3.56	1.243	2.864	0.781	2.781	0.971	8.92546e-05	0.863708	0.000326312	0.824984	0.000377095	0.999779	79.3	282.3	98.6	101.5	28.4	26.44	6.39	21.48	1	6	9	6	2	299.4	4.09	0	21.62	74.5	84.4	127.2	72.9	282.3	165.1	190.8	287	313.8	101.9	92.8	95.3	106.8	107.3	129	96.1	76.4	68.4	79.9
P25822	Maternal protein pumilio OS=Drosophila melanogaster OX=7227 GN=pum PE=1 SV=2	1.171	1.052	1.114	0.97	1.136	1.02	8.93938e-05	0.255166	0.0027242	0.449457	0.00124521	0.973612	1798.4	2106.1	1891.4	1854.1	3.5	3.21	0.89	5.9	1	19	36	19	15	157.4	7.65	0	122.928	1764.4	1724.3	1833	1861.9	2151.8	2106.1	2101.1	2031.2	2215.6	1910	1886.7	1870.2	1896.1	2000.2	1783	1776.8	1928.1	1618.6	1633.8
M9PI45	Mirror, isoform C OS=Drosophila melanogaster OX=7227 GN=mirr PE=3 SV=1	0.805	0.864	0.931	1.02	0.821	0.881	8.94009e-05	0.0111797	0.0848134	0.996152	0.000127542	0.0166548	437.6	352.1	378.2	429.1	5.95	5.34	4.45	4	1	4	4	4	5	71.3	7.3	0	7.299	464.6	443.3	402.3	432.1	360.5	351.6	352.1	359	315.3	374.5	362	402.4	382	454.6	434.9	423.5	414.5	426.2	420
Q9V3H8	NTF2-related export protein OS=Drosophila melanogaster OX=7227 GN=Nxt1 PE=1 SV=1	0.789	0.999	0.79	1.023	0.808	1.023	9.00585e-05	0.999801	0.000102654	0.951082	0.000215035	0.969263	832.1	656.7	831.4	813	4.34	6.74	2.96	3.14	1	5	8	5	28	15.2	6.09	0	22.391	858.2	839.1	774.5	825.2	627	626.6	656.7	714.1	717.6	785.5	832.5	838.2	830.4	799.9	826.5	833.4	778.1	787.2	795
Q9VF53	Aldehyde oxidase 1 OS=Drosophila melanogaster OX=7227 GN=AOX1 PE=1 SV=1	1.383	1.139	1.215	1.049	1.451	1.194	9.01733e-05	0.190177	0.00396694	0.867601	2.72141e-05	0.0520356	3120.6	4317	3552.9	2975.5	5.63	7.72	2.7	11.47	1	25	44	25	20	139	6.67	0	101.98	2989.4	3360.2	3229.3	3015.7	3961.8	4752.3	4317	4747.6	4261.5	3548.5	3393.9	3557.3	3617.1	3439.3	2725	2762.3	3205.2	2742.4	3183.9
Q6NR22	RE27803p OS=Drosophila melanogaster OX=7227 GN=Dmel\CG1360 PE=1 SV=1	0.832	0.817	1.018	1.296	1.078	1.059	9.11154e-05	0.000150302	0.999998	1.18322e-05	0.297152	0.345894	466.8	388.3	381.5	360.1	8.25	4.05	4.59	1.65	1	6	9	6	26	30.9	10.52	0	36.48	447.3	474.5	459.2	536.2	364	370	388.3	401.5	391	376.2	404.9	363.3	386.8	351.9	359.6	366.3	360.7	410.3	449.6
M9PCI1	Uncharacterized protein, isoform B OS=Drosophila melanogaster OX=7227 GN=Dmel\CG43394 PE=4 SV=1	0.792	0.81	0.977	1.056	0.836	0.856	9.12413e-05	0.000506675	0.865703	0.41678	0.00142753	0.00829649	1183.8	937.4	959.3	1121.1	5.47	7.68	4.15	2.43	1	15	23	15	19	105.2	5.1	0	51.306	1167.8	1301.5	1156.3	1200	1028.5	904.5	937.4	1013	855.7	1031.5	970.2	943.6	948.5	1121.3	1121	1174.4	1116	1071.3	1233.2
Q9VUU7	GEO09665p1 OS=Drosophila melanogaster OX=7227 GN=Dmel\CG18081 PE=2 SV=1	0.79	0.951	0.831	1.236	0.976	1.175	9.21463e-05	0.591384	0.000818378	0.000234476	0.992745	0.00203533	1098.4	867.8	1044.4	888.9	1.52	5.24	4.39	6.62	1	3	25	1	32	8.8	9.64	0	15.48	1109.5	1070.6	1097.6	1099.3	903.3	955.8	867.8	865.2	834.1	999.8	1065.8	1023.3	1103.7	833.6	923.2	961.5	855.9	1017.8	1014.4
Q9VUY1	Chloride channel protein OS=Drosophila melanogaster OX=7227 GN=ClC-c PE=2 SV=4	0.851	0.892	0.954	1.029	0.876	0.918	9.24732e-05	0.00146376	0.510898	0.598574	0.000803702	0.0142607	971.1	826.5	866	943.4	1.99	4.41	1.91	2.85	1	17	27	17	26	98	6.96	0	80.034	983.7	985.7	958.7	946.4	826.5	820.3	853.6	909.3	823.9	895	857.9	870.2	861.8	973.1	933.5	910.3	953.3	902.4	934
Q9VAW1	peptidylprolyl isomerase OS=Drosophila melanogaster OX=7227 GN=Moca-cyp PE=1 SV=1	0.816	1.043	0.782	1.088	0.888	1.135	9.32674e-05	0.671702	1.61107e-05	0.0737253	0.0122918	0.0093709	2823.4	2304.4	2945.6	2595.9	4.62	5.64	4.33	3.71	1	39	74	38	31	112.7	10.56	0	108.923	3000.2	2907.1	2742.1	2729.7	2326.5	2239.3	2185.2	2528.1	2304.4	2831	3090.3	2859.5	3034.2	2511.4	2671.2	2695.3	2522.8	2752.3	2754.5
A0A021WW64	Uncharacterized protein, isoform G OS=Drosophila melanogaster OX=7227 GN=FBgn0058460 PE=4 SV=1	1.328	1.057	1.256	0.998	1.325	1.055	9.37691e-05	0.536319	0.000989982	0.871743	0.000333105	0.92535	137.2	182.1	145	137.4	6.81	5.56	3.15	10.64	1	2	2	2	8	30.5	8.94	0	8.356	124.9	134.4	140	146.9	182.1	196.8	179.6	171.5	192.9	147.9	142.1	141.9	151.2	137.5	137.4	129.2	163.9	114.6	127.4
Q9XZ21	Something that sticks like glue, isoform A OS=Drosophila melanogaster OX=7227 GN=snama PE=1 SV=1	0.865	1.001	0.864	1.023	0.885	1.024	9.39292e-05	0.937627	3.78757e-05	0.966265	0.000201076	0.731818	3171.3	2743.9	3174	3099.5	3.11	3.59	0.63	2.1	1	32	68	32	30	139	9.73	0	163.418	3199.9	3226.5	3007.1	3142.9	2859.8	2743.9	2691.4	2932.2	2732.5	3173.5	3205.3	3157.6	3174.6	3072.2	3127	3204	3060.4	2935.5	3057.2
Q7PLE6	3-methyl-2-oxobutanoate dehydrogenase (2-methylpropanoyl-transferring) OS=Drosophila melanogaster OX=7227 GN=BckdhB PE=1 SV=3	0.842	0.832	1.012	1.027	0.864	0.854	9.43592e-05	7.45204e-05	0.953269	0.80984	0.000422279	0.000302532	415.1	349.4	345.3	404.3	1.5	5	3.23	4.9	1	7	15	7	33	40.2	7.42	0	57.303	423.8	414.6	408.6	415.7	364.6	335.8	326.3	366	349.4	329.5	351.3	339.4	353.2	383.6	411.3	397.4	430.1	388.8	392.8
Q9W0P5	UDP-glucose 4-epimerase OS=Drosophila melanogaster OX=7227 GN=Gale PE=1 SV=1	0.772	0.76	1.016	1.164	0.898	0.884	9.53777e-05	0.000102458	0.989628	0.0039506	0.241708	0.181249	4957.9	3826.9	3765.7	4260.5	2.51	8.41	1.19	7.03	1	16	46	16	61	38.7	7.46	0	108.845	5004.8	5113	4911.4	4823.3	3835.2	3826.9	3784.3	4290.5	3382.6	3819	3785.6	3716.5	3746	3704.7	4278.6	4242.6	4326.9	4591.2	4844.7
Q9VSS1	Protein Pixie OS=Drosophila melanogaster OX=7227 GN=pix PE=1 SV=1	0.884	0.994	0.89	1.03	0.911	1.024	9.57963e-05	0.999754	0.000110302	0.492955	0.00116503	0.542263	11500.8	10171.7	11434.1	11164.6	1.57	3.17	1.45	4.35	1	29	87	29	47	69.3	8.13	0	166.137	11738.8	11300.7	11525.8	11475.9	10380.7	10171.7	9857.9	10483.4	9743.7	11465.1	11731.2	11403.2	11358.9	10775.8	11567.4	11628.7	10739.8	10768.7	10707.6
Q9W592	EG:BACN32G11.3 protein OS=Drosophila melanogaster OX=7227 GN=Lrpprc2 PE=1 SV=1	0.866	0.886	0.977	1.048	0.908	0.929	9.58976e-05	0.000309065	0.973354	0.140754	0.00610188	0.0186465	3741.4	3239.9	3315.1	3568.6	3.44	2.93	2.73	2.03	1	33	58	33	35	120.1	8.22	0	146.939	3848	3830.6	3590	3654.4	3239.9	3361.6	3207.3	3429.7	3232.7	3433.1	3287.5	3218.9	3343	3521.7	3476.6	3616	3624	3530	3629.5
Q9Y112	BcDNA.GH10614 OS=Drosophila melanogaster OX=7227 GN=Dmel\CG10863 PE=1 SV=1	1.123	1.13	0.994	0.934	1.049	1.055	9.59659e-05	0.000152231	0.999972	0.0138605	0.0741161	0.0880442	3803.1	4271.4	4296.3	4071.1	4.12	2.16	2.82	1.81	1	14	51	13	42	36.3	7.08	0	80.393	3762.7	3843.9	3980.9	3606.1	4231	4198.4	4415.2	4271.4	4373	4437.6	4366.3	4227.4	4175.4	4073.9	4183	4004.9	4068.2	3451.7	3642.1
Q9VXF9	AT13091p OS=Drosophila melanogaster OX=7227 GN=rngo PE=1 SV=1	0.897	1.055	0.85	1.037	0.93	1.094	9.62634e-05	0.00671466	3.8927e-07	0.133397	0.00652517	0.00012023	5552.8	4979.6	5860.6	5357	0.26	2.77	2.47	1.64	1	16	63	16	43	50.5	5.16	0	137.393	5559.4	5529.6	5546.2	5559.7	4979.6	5238.7	4931.6	4975.1	5190.1	5917.7	5804.1	6085.9	5759.2	5452.1	5411.9	5267	5302.6	5100	5239.4
Q9W1G0	Probable transaldolase OS=Drosophila melanogaster OX=7227 GN=Taldo PE=2 SV=2	0.873	0.987	0.885	1.018	0.889	1.004	9.6289e-05	0.84874	0.000374955	0.57234	0.000911351	0.957332	6260.9	5468.8	6177.7	6152.7	2.06	2.18	1.74	5.15	1	13	43	13	40	36.7	7.71	0	69.831	6290.8	6231.1	6495.2	6210.5	5409.7	5590.3	5692.2	5468.8	5427.3	6156.6	6198.9	6344.9	6090.2	5767.1	6469.7	6314.3	5995.1	5770.9	5904
Q9VWI0	NADH dehydrogenase [ubiquinone] iron-sulfur protein 4, mitochondrial OS=Drosophila melanogaster OX=7227 GN=ND-18 PE=1 SV=2	1.248	0.896	1.393	0.892	1.113	0.799	9.71728e-05	0.00883344	4.66109e-07	0.0364606	0.0276573	4.87659e-05	328.9	410.4	294.6	368.7	1.88	5.4	4.99	5.71	1	5	9	5	36	20.7	9.8	0	19.556	325.3	326.2	338.9	331.5	410.4	414.9	440.7	382.1	395.7	269.1	299	300.5	290.3	378.1	343	390.9	359.4	298.5	309.1
Q7JW03	E2 ubiquitin-conjugating enzyme OS=Drosophila melanogaster OX=7227 GN=UbcE2H PE=1 SV=1	0.855	0.824	1.037	1.115	0.953	0.919	9.7578e-05	6.88622e-05	0.931836	0.00934049	0.111546	0.0522072	1624.1	1388	1338.3	1456.2	4.18	4.93	2.29	2.2	1	7	13	7	39	20.9	4.79	0	33.302	1685.1	1637.1	1524.1	1611.2	1388	1301.3	1440.9	1425.1	1298.1	1343.7	1332.9	1394.3	1326.4	1461.7	1450.7	1497	1419.3	1545.9	1551.2
Q9VEV7	Protein farnesyltransferase subunit beta OS=Drosophila melanogaster OX=7227 GN=Fntb PE=1 SV=1	1.056	1.099	0.961	0.985	1.04	1.083	9.85339e-05	6.27311e-07	0.00348918	0.267375	0.00287193	6.42364e-06	1267.6	1338.7	1393.4	1286.6	0.7	1.78	1.51	0.67	1	11	19	11	24	46.7	5.39	0	55.758	1273.3	1265.1	1253.2	1270	1327.9	1342.7	1313.6	1338.7	1377.7	1409.4	1377.6	1412.4	1371.8	1280	1298.9	1290.8	1282.5	1168.1	1198.7
Q3YMU0	Protein disulfide-isomerase (Fragment) OS=Drosophila melanogaster OX=7227 GN=ERp60 PE=1 SV=1	1.108	0.939	1.18	1.163	1.288	1.092	9.93525e-05	0.0413015	1.30969e-06	1.29548e-05	7.99108e-09	0.00147263	24891.5	27574.6	23373.6	21407.2	1.41	1.94	1.55	4.36	1	29	198	29	60	55.3	5.87	0	159.214	24819.8	24260.8	25026.6	24963.4	27605	27574.6	28622.1	27203.4	27507.3	23151.8	23597.4	23884.7	23140	20695	22413.7	22143.8	20645.8	22768.6	22987.4
Q8SXX1	Phosphatidylinositol 5-phosphate 4-kinase, isoform A OS=Drosophila melanogaster OX=7227 GN=PIP4K PE=1 SV=1	0.84	1.179	0.712	0.995	0.835	1.173	9.9815e-05	0.000877281	1.13059e-07	0.924409	3.75774e-05	0.00258064	1922	1613.8	2266	1931.8	1.42	6.44	1.32	4.53	1	13	26	13	30	47	7.37	0	64.542	1902.9	1889	1941.3	1942.6	1613.8	1416.3	1589.1	1632.7	1686.4	2207.9	2269.6	2264.4	2267.7	1880.5	2084.8	1925.6	1938	1745.6	1789.9
M9PDW8	Uncharacterized protein, isoform T OS=Drosophila melanogaster OX=7227 GN=CG3950 PE=1 SV=1	1.153	1.154	1	1.125	1.297	1.298	0.000100503	2.76742e-05	0.597814	0.000309394	5.97312e-08	3.54456e-08	8961.4	10334	10337.3	7966	2.41	3.39	2.06	3.02	1	121	203	121	25	579.9	9.04	0	551.433	8726.2	8922.2	9248	9000.7	10377.1	9991.2	10461.9	10334	9633.5	10226.1	10714.3	10321	10353.6	8063	8291	7870.2	7735.3	8005.1	8453.9
Q9VXK6	Eukaryotic translation initiation factor 5 OS=Drosophila melanogaster OX=7227 GN=eIF5 PE=1 SV=1	0.859	1.059	0.811	0.974	0.837	1.031	0.000100845	0.0426382	1.35433e-06	0.783325	2.32307e-05	0.209668	6106	5245.2	6464	6270	1.65	3.88	3.47	2.76	1	25	65	25	51	51.7	5.26	0	134.602	6001.3	6039.4	6208.5	6173.3	5525.5	5245.2	5170	5133.5	5577.9	6419.8	6335.1	6851	6508.4	6400.9	6309	6231.3	5998.2	5505.4	5722.4
O96433	Cyclin-T OS=Drosophila melanogaster OX=7227 GN=CycT PE=1 SV=2	0.898	1.051	0.855	0.988	0.887	1.038	0.000100932	0.316756	6.77086e-06	0.91775	0.000293148	0.118396	1500.1	1347.7	1577.1	1518.7	4.15	3.13	0.86	2.07	1	24	46	24	29	118.2	9.52	0	139.486	1490.8	1509.4	1490.4	1622.6	1415.2	1315	1347.7	1311.4	1363.1	1603.7	1575.2	1576.4	1577.7	1463.3	1525.7	1532.3	1511.8	1367.6	1430.2
Q9XYZ9	Glutathione S transferase E12, isoform A OS=Drosophila melanogaster OX=7227 GN=GstE12 PE=1 SV=1	1.127	1.194	0.945	1.001	1.129	1.195	0.000101436	2.15799e-05	0.488252	0.963821	4.78155e-05	1.12258e-05	2475.9	2791.2	2955.1	2473.4	3.35	4.35	1.52	2.78	1	8	25	8	39	25.2	6.29	0	51.989	2413.2	2540.2	2552.6	2394.2	2889.8	2761.6	2791.2	2769.9	3055.8	2882.1	2968.9	2941.4	2983.2	2497	2483.6	2348.3	2463.2	2213.8	2406.9
Q9V3Z4	GH11341p OS=Drosophila melanogaster OX=7227 GN=Rpn5 PE=1 SV=1	1.069	1.122	0.953	0.891	0.953	1	0.000101925	5.90877e-07	0.0030332	5.39268e-07	0.00260006	0.999791	7735	8267.8	8680.1	8678.2	0.68	1.37	1.15	2.51	1	22	84	22	41	57.7	5.8	0	141.882	7706.8	7763.4	7699.5	7811.9	8166.5	8240.4	8470.8	8267.8	8319.3	8824.6	8580.9	8680.9	8679.2	8834	8525.2	8505.6	8938.9	7069.8	7356
P48588	Small ribosomal subunit protein eS25 OS=Drosophila melanogaster OX=7227 GN=RpS25 PE=1 SV=3	0.906	0.941	0.963	1.086	0.984	1.022	0.000102022	0.00648993	0.165348	0.00152982	0.532135	0.848899	5657.4	5127.5	5324.9	5208.6	1.47	1.56	2.04	3.15	1	6	40	6	41	13.2	10.27	0	32.276	5727	5549.3	5704.5	5610.7	5090	5230.7	5064.9	5127.5	5239.4	5264.3	5386.2	5190.2	5424.6	5144.5	5273.6	5479.5	5116.7	5253.7	5258.1
Q9VXH9	WASH complex subunit 4 OS=Drosophila melanogaster OX=7227 GN=SWIP PE=1 SV=2	0.922	1.024	0.9	0.973	0.897	0.997	0.00010228	0.54146	1.2665e-05	0.448918	9.99655e-06	0.9983	921.3	849.7	943.6	946.9	1.01	3.54	0.78	1.69	1	19	21	19	18	127.3	8.98	0	57.997	923.8	912.5	918.7	934.4	817	849.7	795.8	862.4	861.8	932.5	941.8	949.7	945.5	946.3	923.7	947.4	962.3	847.5	864.6
A1Z7K8	AaRS-interacting multifunctional protein 1 OS=Drosophila melanogaster OX=7227 GN=AIMP1 PE=1 SV=1	1.105	1.048	1.055	1.066	1.179	1.117	0.000102303	0.130957	0.00716307	0.00377394	2.83113e-07	7.24533e-05	4532.3	5009.7	4748.8	4250.3	2.81	1.8	1.93	2.41	1	13	31	13	43	34.4	8.91	0	58.73	4609.6	4456.2	4689.7	4419.5	5104.4	5093.2	4943.8	4899.5	5009.7	4718.1	4783.7	4588.3	4779.8	4332.8	4126.3	4319.6	4182.1	4228.7	4222.3
Q9U1H0	Putative transcription factor capicua OS=Drosophila melanogaster OX=7227 GN=cic PE=1 SV=2	0.773	1.006	0.769	0.805	0.622	0.809	0.000102682	0.999798	0.000117224	0.000732558	1.0305e-07	0.000638533	393.9	304.6	396.3	489.6	4.96	7.09	2.47	6.81	1	7	9	7	6	195.5	7.17	0	25.624	388.3	420.6	374.1	399.6	304.6	284.4	313.1	342.9	297.8	395.7	380.4	396.9	403.3	464.8	515.7	458.8	522.8	356.2	398.5
C0HM00	Baramicin A2 OS=Drosophila melanogaster OX=7227 GN=BaraA2 PE=1 SV=1	0.66	0.437	1.51	2.369	1.563	1.035	0.000103083	4.87284e-08	4.50913e-05	1.89552e-08	9.81427e-06	0.736861	3149.2	2077.7	1375.6	1329.2	8.96	10.74	4.87	10.61	1	9	20	9	40	28	10.78	0	51.671	2883.9	3169.9	3128.7	3573.5	1932.3	2025.7	2077.7	2529.4	2146.4	1396.7	1354.9	1472.7	1314.8	1429.8	1111.9	1290.6	1368.9	2645.6	3003.6
Q9V9T9	Beta-glucuronidase OS=Drosophila melanogaster OX=7227 GN=betaGlu PE=1 SV=1	1.105	0.884	1.249	1.059	1.17	0.936	0.000103404	4.61741e-05	1.84424e-08	0.0270349	1.01128e-06	0.011162	1319.7	1457.8	1166.8	1246.3	4.11	2.51	1.08	0.89	1	11	19	10	18	79.3	6.98	0	39.044	1324.2	1315.2	1394.4	1261.9	1538.1	1479.1	1456.6	1445.7	1457.8	1164.9	1168.6	1155.8	1185.9	1249.1	1243.5	1238.8	1264.2	1214.8	1246.1
Q24372	Lachesin OS=Drosophila melanogaster OX=7227 GN=Lac PE=1 SV=2	1.223	1.06	1.154	1.075	1.315	1.139	0.000103407	0.355799	0.00206737	0.0614575	1.78799e-06	0.00276331	1634.3	1999.2	1732.9	1520.8	2.44	6.09	3.59	2.95	1	7	22	7	21	39.9	5.45	0	44.56	1617.2	1635.5	1707.5	1633.1	2079.6	1794.9	1972.4	1999.2	2100.4	1664.2	1727.2	1816	1738.6	1534.5	1558.4	1454.6	1507.2	1483.5	1549.7
Q9I7W5	Something about silencing protein 10 OS=Drosophila melanogaster OX=7227 GN=Sas10 PE=1 SV=2	0.764	0.874	0.874	1.044	0.798	0.913	0.000104516	0.0243602	0.0459791	0.460392	0.0014318	0.305848	975.9	745.6	853.1	934.4	4.61	7.89	5	5.61	1	10	17	9	21	49.4	4.84	0	58.02	1045.3	990.7	940.7	961.4	743.5	745.6	676.4	841.5	773.9	843	903.9	801.4	863.2	964.9	963.6	906.1	857.1	958.9	938.7
Q7KML2	Acyl-coenzyme A oxidase 1 OS=Drosophila melanogaster OX=7227 GN=Acox1 PE=1 SV=1	1.117	1.15	0.971	1.067	1.192	1.227	0.000104589	1.17011e-05	0.258029	0.0025914	2.27508e-07	6.41025e-08	2644.2	2952.4	3040.7	2477.5	2.02	3.1	1.55	2.59	1	24	42	24	46	74.2	6.9	0	132.429	2621.4	2636.1	2741.1	2652.4	2961.5	2867.7	3112.4	2952.4	2914.9	3036.1	3045.3	3125.7	3019	2376.6	2447.8	2507.5	2513.5	2404.7	2497.8
Q9W229	40S ribosomal protein S24 OS=Drosophila melanogaster OX=7227 GN=RpS24 PE=1 SV=1	0.858	0.953	0.9	1.043	0.895	0.994	0.000104643	0.0742261	0.0139867	0.23331	0.00366554	0.895487	3194.5	2740.9	3045.5	3063.9	4.7	3.06	3.76	3.78	1	7	30	7	50	15	11.22	0	39.843	3461	3112.3	3204.6	3184.4	2740.9	2860.7	2703.7	2783.1	2636.9	3004.5	3087.1	2854.9	3102.1	2985.6	3144.2	3191.4	2955.9	3174.9	2948.9
M9PD12	Spichthyin, isoform B OS=Drosophila melanogaster OX=7227 GN=spict PE=3 SV=1	0.781	0.965	0.809	0.87	0.679	0.84	0.000104948	0.468903	0.00139788	0.0126356	6.19691e-07	0.000882419	246.5	192.5	237.9	283.3	1.99	6.83	5.02	5.52	1	4	4	4	9	43.3	7.64	0	17.617	254.8	245.3	247.7	243.6	180.6	192.5	214.3	206.9	191	232.9	243.7	243.1	218.5	305.5	280.3	267.7	286.5	233.8	232.4
A0A126GV06	Uncharacterized protein, isoform B OS=Drosophila melanogaster OX=7227 GN=Dmel\CG6972 PE=4 SV=1	1.165	0.96	1.214	0.987	1.15	0.947	0.000105293	0.521154	1.23491e-05	0.773461	0.000537654	0.134661	209.3	243.8	200.9	212.1	1.69	4.97	3.91	2.63	1	3	4	3	10	34	5.12	0	12.862	210.6	208	211.2	203.5	226.1	253.7	243.8	243	257.5	193.6	194.7	208.3	207.2	208.8	221.5	210.6	213.7	193.2	197
Q9Y109	BcDNA.GH11023 OS=Drosophila melanogaster OX=7227 GN=Nulp1 PE=2 SV=1	0.899	1.018	0.883	0.995	0.895	1.013	0.000106655	0.34102	7.65169e-06	0.90848	3.72555e-05	0.70667	3172	2850.6	3228.5	3186.4	2.06	3.07	1.63	0.57	1	22	46	21	32	78.8	6.4	0	113.728	3061.3	3212	3167.8	3176.3	2998	2783.1	2812.6	2931.5	2850.6	3262.3	3194.4	3195.1	3301.8	3205.9	3194.3	3164	3178.5	2808.3	3043.4
Q9VRD4	Uncharacterized protein, isoform A OS=Drosophila melanogaster OX=7227 GN=Dmel\CG1532 PE=1 SV=1	1.115	0.834	1.338	1.045	1.165	0.871	0.000106747	7.46337e-07	1.34213e-09	0.0522425	1.63185e-06	3.09814e-05	2633.4	2937.1	2195.3	2520.5	0.87	2.11	1.03	4.26	1	9	24	9	41	31.6	5.39	0	61.108	2621.8	2654.1	2603.7	2645	2937.1	2965.7	2905.6	2838.2	3000.1	2182.7	2188.1	2233.4	2202.6	2356.8	2612.5	2527.2	2513.9	2405.1	2514.8
Q9VF14	Endoribonuclease OS=Drosophila melanogaster OX=7227 GN=EndoU PE=2 SV=2	1.199	0.994	1.207	0.991	1.189	0.985	0.000107263	0.971173	0.000221295	0.875861	0.000378035	0.988957	984.2	1179.8	977.9	992.6	5.35	3.75	4.54	2.4	1	8	19	8	25	37.1	6.68	0	47.08	911.2	971.3	1036	997.2	1141	1192.4	1225.6	1113.5	1179.8	1053.7	962.3	954.9	993.6	995.5	979.2	989.8	1034.1	835.9	920.3
M9PHB8	Sarcoplasmic calcium-binding protein, isoform C OS=Drosophila melanogaster OX=7227 GN=CBP PE=1 SV=1	1.43	1.436	0.996	0.771	1.103	1.107	0.000107777	7.74498e-05	0.937078	0.00192424	0.474511	0.253949	1351.2	1932.3	1939.7	1752.5	7.48	7.79	4.46	8.27	1	9	20	9	20	63.8	9.51	0	44.075	1310.6	1284.7	1513.2	1393	1932.3	1718.6	2027.4	1735.2	2000.5	1911.3	1824.7	2027	1968.5	1814.8	1584.9	1692.3	1918.1	1202.3	1217.2
Q9W403	LD24968p OS=Drosophila melanogaster OX=7227 GN=Dmel\CG3847 PE=2 SV=1	0.806	1.038	0.776	1.073	0.865	1.114	0.000107827	0.791323	2.52782e-05	0.375448	0.00200963	0.0900155	785.2	632.5	815.1	731.6	4.18	5.7	2.67	7.62	1	6	6	6	14	43.6	4.83	0	24.439	796.3	774.2	744.5	821.6	641.4	629.5	556.1	632.5	634	783.8	811	835.8	819.2	689.9	775.9	792.8	686	730.5	733.6
Q24169	Origin recognition complex subunit 5 OS=Drosophila melanogaster OX=7227 GN=Orc5 PE=1 SV=1	1.25	1.115	1.121	0.992	1.24	1.106	0.000108238	0.0119776	0.0980278	0.923549	0.000306337	0.0371171	1821.2	2276.1	2030.4	1835.3	3.72	7.23	2.3	2.29	1	13	21	13	25	52.1	6.55	0	64.68	1700.3	1808.1	1847.8	1834.4	2124.9	2387.4	2276.1	1980	2290.1	2039.8	1984.7	2021	2097	1841.3	1783.3	1829.3	1885.3	1559.8	1713.2
Q9VRG4	ATP binding cassette subfamily A, isoform B OS=Drosophila melanogaster OX=7227 GN=Abca3 PE=4 SV=2	0.861	1.059	0.812	0.882	0.759	0.935	0.000108902	0.207405	4.85435e-06	0.00339748	2.76782e-07	0.14205	286.7	246.8	303.8	325.1	3.91	2.65	4.36	4.45	1	2	3	2	1	192.9	6.58	0.008	2.327	308.7	286.1	284.5	287.4	253.9	246.5	252.4	237.2	246.8	299.6	308	327.7	298.7	347	317.3	333.1	316.2	283.2	271
Q9VWE6	Protein ELYS homolog OS=Drosophila melanogaster OX=7227 GN=Elys PE=1 SV=2	1.109	1.122	0.989	0.952	1.056	1.068	0.000110258	6.80856e-05	0.90212	0.0597302	0.0188865	0.00802214	5562	6170.6	6241.7	5842.6	2.18	1.26	0.46	4.34	1	46	85	46	27	235	5.33	0	221.614	5503.8	5669.6	5400.4	5620.9	6114.8	6294.2	6170.6	6093.8	6170.9	6246	6199.9	6268.6	6237.4	6045.9	5579.8	5646.1	6051.2	5048.9	5372
Q9VBS8	IP10876p OS=Drosophila melanogaster OX=7227 GN=Dmel\CG31370 PE=1 SV=3	1.199	1.572	0.763	1.009	1.211	1.587	0.000110856	1.65273e-08	7.42078e-06	0.942772	4.55856e-05	1.01839e-08	145.5	174.5	228.7	144.2	6.38	2.89	4.74	2.76	1	3	3	3	6	46.3	5.33	0	4.088	149.7	141.4	158.2	137.1	174.5	183.7	180.6	173.8	171.4	224.2	234.1	233.3	211.1	148.4	145.3	139	143.1	137.3	134
Q9VID9	Uncharacterized protein, isoform B OS=Drosophila melanogaster OX=7227 GN=BEST:LD19244 PE=1 SV=3	1.163	0.998	1.165	1.069	1.243	1.067	0.000111723	0.987321	0.000192211	0.0945606	2.61397e-06	0.0533906	1345.9	1565.6	1343.4	1259.2	2.02	3.78	1.08	4.77	1	35	44	35	15	292.4	5.27	0	122.341	1299	1355.2	1357.5	1336.7	1565.6	1582.8	1502.7	1463.7	1602.9	1367.7	1340	1334.3	1346.9	1256.2	1187.2	1262.3	1334.2	1191.6	1284
Q9V9M7	60S ribosomal protein L21 OS=Drosophila melanogaster OX=7227 GN=RpL21 PE=1 SV=1	0.892	0.906	0.984	1.087	0.97	0.985	0.000112036	0.00112744	0.67562	0.00969838	0.12492	0.634165	11768.8	10493.8	10659.2	10822.1	0.57	1.88	2.41	4.79	1	12	75	12	60	18.5	10.55	0	60.865	11876.2	11754.8	11782.8	11717.8	10541.8	10493.8	10160.7	10682.9	10372	10691.7	11002	10376.6	10626.9	10555.6	11095.3	11608.1	10488.5	10894.7	11137.8
Q9VPB8	Peroxisomal membrane protein PEX14 OS=Drosophila melanogaster OX=7227 GN=Pex14 PE=1 SV=1	0.88	0.877	1.004	1.064	0.937	0.933	0.000112077	0.000370927	0.97035	0.015725	0.0777856	0.195112	1393.9	1227.2	1222.3	1310.1	0.74	3.41	1.74	4.43	1	10	31	10	36	30.8	6.7	0	58.739	1397	1396.2	1374.8	1391.7	1227.2	1246.9	1200	1265.8	1159.6	1262.1	1214.8	1222.2	1222.5	1205.9	1327.9	1324.9	1295.5	1281.5	1322.9
A0A0B4JD40	RING-type E3 ubiquitin transferase OS=Drosophila melanogaster OX=7227 GN=Dmel\CG18605 PE=4 SV=1	0.351	0.477	0.737	1.988	0.698	0.947	0.000112121	0.00336355	0.321565	0.0381422	0.0311933	0.557602	29.1	10.2	13.9	14.6	9.67	27.5	17.09	35.69	1	1	1	1	2	46.6	6.74	0	4.146	32	30.3	25.5	28	11.4	9.7	10.2	5.6	12.9	14.8	10	13	14.8	26.4	14.9	14.4	13.3	29.3	28.7
Q6IDH2	NAD(+) kinase OS=Drosophila melanogaster OX=7227 GN=Nadk1a PE=2 SV=1	0.675	0.74	0.912	1.346	0.908	0.996	0.000112491	0.00105268	0.701342	0.00052153	0.912174	0.975166	452.6	305.5	335	336.4	3.81	10.81	2.98	10.82	1	6	13	4	11	61.2	6.95	0	29.165	453.5	451.8	429.3	471.4	300.8	327.7	305.5	369.1	278.8	322.4	336	334.1	346.8	278.3	341.3	361.6	331.5	416	428.1
B7YZJ4	Ataxin-10 OS=Drosophila melanogaster OX=7227 GN=Atxn10 PE=3 SV=1	0.837	0.91	0.92	0.812	0.68	0.739	0.000113018	0.0527317	0.0222609	0.000113843	3.43907e-08	2.08809e-06	419	350.6	381.1	515.8	4.35	6.21	4.42	3.28	1	4	6	4	12	47.1	6.24	0	21.127	408.5	430.9	393.3	429.6	350.6	352.5	315.3	353.7	313	374.7	353.1	387.7	388.8	500.8	517.7	514	541.7	374.8	408.3
Q9VW21	Phosphatidylinositol glycan anchor biosynthesis class F OS=Drosophila melanogaster OX=7227 GN=PIG-F PE=4 SV=2	1.099	0.91	1.208	0.932	1.024	0.848	0.000114217	0.000658208	1.03275e-07	0.00715362	0.169764	2.04508e-06	618.8	680.1	563.2	664.2	1.9	2.41	2.89	2.52	1	2	5	2	7	26.2	8.95	0	6.87	629.1	604.4	626.1	611.7	680.1	703.7	705.2	668.2	677.6	580.3	545.2	572.8	553.8	672.4	641.9	656.1	678.9	577.1	572.7
C0HK94	Uncharacterized protein CG45078 OS=Drosophila melanogaster OX=7227 GN=CG45078 PE=4 SV=1	1.515	0.852	1.778	0.886	1.342	0.755	0.000114448	0.0865073	2.49076e-06	0.327081	0.00260929	0.0035081	43.4	65.8	37	49	5.86	4.23	16.89	6.2	1	4	4	3	28	18.8	10.36	0	8.578	40.8	42.5	46.7	44.4	64.6	68.7	68.2	61.8	65.8	29.1	44.3	36.3	37.7	45.5	49.1	49	53	37.4	40.2
Q9VLU5	WW domain-containing oxidoreductase OS=Drosophila melanogaster OX=7227 GN=Wwox PE=2 SV=1	0.844	0.784	1.078	0.838	0.708	0.657	0.000115925	7.31604e-07	0.00373929	8.04987e-05	2.8052e-08	1.70714e-09	534.4	451.3	418.7	637.4	2.12	4.84	4.28	2.05	1	6	9	6	16	46.5	7.49	0	20.713	548.2	542.5	526.3	525.9	438.1	447.3	495.6	451.3	458	419	385.3	423.4	418.4	643.9	620.6	649.6	630.9	502.9	514.1
Q9VZZ4	Peroxidasin OS=Drosophila melanogaster OX=7227 GN=Pxn PE=1 SV=1	1.374	1.025	1.34	0.885	1.215	0.907	0.000115963	0.999998	0.000112701	0.179479	0.00571226	0.174596	530.1	728.3	543.6	599.3	8.55	7.15	4.82	5.71	1	10	13	10	8	170.4	6.28	0	33.75	613	506.9	529.6	530.6	699.8	728.3	794.5	657.1	751.2	540.8	575.7	511.7	546.4	649	598.5	600.1	565.4	562.3	480.3
Q9VCU7	Protein vreteno OS=Drosophila melanogaster OX=7227 GN=vret PE=1 SV=1	0.872	1.07	0.814	0.971	0.847	1.04	0.000116024	0.00655894	4.37534e-07	0.162342	4.1447e-06	0.313453	2502.6	2181	2678.9	2576.2	3.17	3.83	1.62	1.98	1	18	31	18	26	78.9	6.02	0	80.269	2528.7	2508.4	2356.7	2496.7	2181	2221.1	2134.4	2298.5	2078.9	2740.4	2700.7	2644.9	2657.4	2660.9	2578.3	2540.2	2574.1	2319.7	2376.8
Q7KVP9	General transcription and DNA repair factor IIH helicase subunit XPD OS=Drosophila melanogaster OX=7227 GN=Xpd PE=1 SV=1	0.909	1.038	0.876	0.976	0.887	1.013	0.000116587	0.0843372	2.47972e-06	0.735878	2.32879e-05	0.40779	1819.1	1653.6	1887.5	1863.8	1.34	2.99	1.26	2.89	1	20	38	20	32	88	6.77	0	103.148	1835.2	1812.5	1779.6	1825.7	1653.6	1598	1670.5	1694.5	1578.7	1926.6	1876.7	1898.3	1876.3	1885.8	1863.8	1766.6	1863.7	1683.6	1717.3
Q9VPL5	LD27216p OS=Drosophila melanogaster OX=7227 GN=Tbc1d15-17 PE=1 SV=1	0.943	1.04	0.906	0.943	0.889	0.981	0.000116866	0.00176536	1.93155e-07	0.000111509	3.46303e-08	0.377817	2818.6	2658	2932.4	2990.1	1.42	1.19	1.5	0.88	1	21	37	21	35	81.8	5.19	0	107.47	2767.1	2815.3	2864.8	2822	2718.7	2658	2645.4	2677.8	2640.4	3001	2934.7	2930.1	2895.4	2950.9	3004.7	3005.8	2975.5	2538.4	2667.5
Q9VUH6	Myopic OS=Drosophila melanogaster OX=7227 GN=mop PE=1 SV=2	1.139	0.944	1.207	1.001	1.14	0.944	0.000117078	0.131527	3.51336e-06	0.855449	0.00045049	0.0328059	4411.9	5024.8	4164.2	4409.6	2.45	3.47	0.83	4.83	1	28	58	28	16	200.2	6.42	0	149.279	4261.2	4394.9	4521.4	4429	5024.8	4930.9	5172.8	4871	5298.5	4171	4131.7	4214.2	4157.4	4457.6	4362.2	4321.6	4798.8	3909.1	4164.2
A1ZA03	Pms2 OS=Drosophila melanogaster OX=7227 GN=Pms2 PE=3 SV=1	1.218	1.217	1	0.93	1.132	1.131	0.000118226	0.000184956	0.99996	0.174231	0.00605584	0.00818156	485.7	591.3	591.1	522.4	5.68	5.91	1.19	3.12	1	13	18	13	17	101.2	5.53	0	47.649	453.4	492.8	519.6	478.7	591.3	607.7	589.1	539.3	635.4	602	586.3	593.8	588.3	540.3	501.7	517.4	527.4	416	466.9
P48149	Small ribosomal subunit protein uS8A OS=Drosophila melanogaster OX=7227 GN=RpS15Aa PE=1 SV=2	0.858	0.93	0.923	1.013	0.869	0.942	0.000119439	0.0236015	0.0553814	0.85121	0.000467835	0.0985763	1584.6	1359.1	1472.9	1563.7	2.45	2.9	2.19	5.07	1	11	91	2	71	14.8	9.8	0	88.802	1625.1	1609.5	1544	1560.1	1359.1	1393.4	1351	1432.1	1331.2	1489.8	1488.4	1457.5	1421.6	1574.1	1643.9	1553.5	1452.9	1490.8	1525
O97132	Anoctamin OS=Drosophila melanogaster OX=7227 GN=Axs PE=3 SV=1	1.146	0.986	1.162	0.803	0.92	0.792	0.000119498	0.9672	5.73983e-05	8.53277e-07	0.00466373	5.10468e-07	550.3	630.8	542.8	685.5	2.41	1.9	1.4	5.47	1	8	10	8	12	75.2	8.19	0	29.506	528.7	552	559.7	548.7	633.8	639	630.8	618.5	609.9	542.4	543.3	531.4	549.7	726.3	665	644.4	706.7	485	523.1
Q9VY15	FI17948p1 OS=Drosophila melanogaster OX=7227 GN=Dmel\CG14411 PE=2 SV=1	0.803	0.835	0.962	1.225	0.983	1.022	0.000120288	0.0010331	0.732336	0.000286805	0.995547	0.86862	1132.5	909.5	945.2	924.9	6.38	6.64	2.62	3.2	1	24	31	24	32	93.9	7.18	0	98.454	1210	1068	1187.1	1080.5	862.9	915.9	860.3	1009.7	909.5	929.3	967	915.9	961.3	940.2	909.8	941.2	879.4	1110	1011.9
Q9VIX1	Galactose-specific C-type lectin, isoform A OS=Drosophila melanogaster OX=7227 GN=Lectin-galC1 PE=2 SV=1	0.062	0.116	0.531	0.83	0.051	0.096	0.000120521	0.00244796	0.421951	0.843034	4.31506e-05	0.00077322	27.5	1.7	3.2	33.1	15.34	88.42	24.77	23.3	1	1	1	1	5	21.5	6.33	0.007	2.36	29.5	20.3	27.4	27.5	0.5	1	2.8	5.2	0	2.6	3.2	4.3	0	49	34.4	30.7	31.8	27.1	19.3
A1Z9I6	Uncharacterized protein, isoform A OS=Drosophila melanogaster OX=7227 GN=anon-EST:GressD1 PE=1 SV=1	1.25	1.155	1.082	0.868	1.085	1.003	0.000120735	0.00577999	0.217641	0.0121748	0.108705	0.97596	518.4	647.8	598.8	596.9	5.01	5.25	2.79	4.35	1	9	13	9	27	42.1	6.33	0	49.709	508.3	522.9	566.6	513.9	673.3	588.3	647.8	665.9	633.2	587.8	589.5	623.2	608.2	562.1	605.9	587.9	622.4	466.3	495.4
P46824	Kinesin light chain OS=Drosophila melanogaster OX=7227 GN=Klc PE=1 SV=1	1.121	1.114	1.006	0.945	1.059	1.053	0.00012087	0.000214104	0.999983	0.0513575	0.0247819	0.0358739	7580.9	8496.5	8448.2	8020.8	1.9	3.15	2.94	2.41	1	25	64	25	50	58	6.25	0	120.897	7447.4	7490.3	7672.6	7749.7	8487.6	8496.5	8847.6	8119.2	8654.5	8853.6	8308.7	8554.8	8342.9	8082.8	7959.2	7798.6	8254.8	6831.9	7097.1
Q8SXX0	RH08992p OS=Drosophila melanogaster OX=7227 GN=BcDNA:RH08992 PE=2 SV=1	0.851	1.018	0.836	0.922	0.785	0.939	0.00012133	0.982467	6.7163e-05	0.0333375	1.31562e-06	0.064147	349.5	297.5	355.8	379	1.95	4.78	2.64	3.74	1	5	5	5	21	30.4	9.58	0	24.861	346.1	360.5	352.9	346.1	309.4	297.5	322.9	286.2	293.6	362.2	349.6	362.8	344	395.9	368.9	389.4	367.9	317.5	341.5
Q8MKJ6	Peptidyl-prolyl cis-trans isomerase OS=Drosophila melanogaster OX=7227 GN=cg11777 PE=1 SV=1	0.863	1.04	0.83	1.055	0.911	1.098	0.000121448	0.633735	1.8579e-05	0.171507	0.00636866	0.020912	357.3	308.4	371.7	338.5	3.75	3.5	5.28	2.96	1	3	7	3	22	17.8	6.18	0	10.281	347.7	377.6	351.3	363.4	308.5	300.1	308.4	315.4	287.6	354.2	391.7	387	356.9	326.9	334	349.7	343	319	357.7
A0A0B4LET0	Uncharacterized protein, isoform B OS=Drosophila melanogaster OX=7227 GN=Dmel\CG7737 PE=1 SV=1	1.145	0.995	1.151	1.004	1.15	0.999	0.000121994	0.999883	0.000109221	0.696881	2.19037e-05	0.735228	1140.1	1305.4	1134.5	1135.1	3.66	0.94	1.44	5.07	1	13	24	13	24	61.9	5.31	0	66.485	1136.7	1190	1088.1	1143.6	1319.8	1286.9	1302.2	1311.8	1305.4	1120.7	1159.8	1134.1	1134.9	1128.8	1150.5	1141.4	1028.9	1042.7	1127.5
Q5U191	Pummelig, isoform A OS=Drosophila melanogaster OX=7227 GN=puml PE=1 SV=1	1.228	1.224	1.004	0.962	1.182	1.177	0.000122339	0.000375339	0.978777	0.999953	0.000132802	0.000407555	821.3	1008.9	1005.2	853.8	3.32	3.94	4.14	6.67	1	11	18	11	24	50.3	7.56	0	38.976	809	827.1	870.3	815.5	1008.9	997	1011.9	977.7	1083.1	1049.6	953.1	989.5	1021.2	751.6	863.7	844	872.6	742.1	783.7
Q9W230	Zinc finger Ran-binding domain-containing protein 2 OS=Drosophila melanogaster OX=7227 GN=Dmel\CG3732 PE=2 SV=1	0.88	0.805	1.092	1.094	0.962	0.881	0.00012301	2.56806e-06	0.0267233	0.00518538	0.243679	0.00122593	355.6	312.8	286.3	325	3.78	3.25	1.68	4.11	1	5	6	5	17	31	5.92	0	13.935	341.1	371.9	349.7	361.5	294.5	319	314.2	301.8	312.8	292.2	288	280.9	284.6	334.6	318.7	331.3	305.5	312.9	352.4
Q94523	Succinate dehydrogenase [ubiquinone] flavoprotein subunit, mitochondrial OS=Drosophila melanogaster OX=7227 GN=SdhA PE=2 SV=3	0.906	0.901	1.005	1.03	0.933	0.929	0.000123336	0.00016417	0.99864	0.186445	0.00586009	0.00659917	7525.8	6816	6781.3	7303.1	3.47	1.66	1.38	3.17	1	23	83	23	44	72.3	7.12	0	173.234	7989.5	7608.2	7444.4	7414.9	6759.7	6831.5	6746.3	7029.3	6816	6956.2	6760.8	6801.9	6755.7	7619.8	7393.6	7213.8	7085.1	7329.2	7208.8
Q9VA81	GEO10172p1 OS=Drosophila melanogaster OX=7227 GN=mRpS18C PE=2 SV=2	1.551	0.747	2.077	1.353	2.099	1.011	0.000123529	0.00510329	3.89933e-07	0.00357679	3.1164e-07	0.997136	1653.9	2565.7	1235.2	1222.3	16.37	4.68	9.6	7.2	1	6	13	6	29	16.2	9.07	0	27.059	1766.2	1548.6	2006	1372.7	2565.7	2737.2	2520.9	2403.7	2569.7	1093.1	1179.7	1293.4	1358.8	1233.7	1096.7	1307.3	1210.9	1620.3	1467.4
A1ZBW6	Uncharacterized protein, isoform A OS=Drosophila melanogaster OX=7227 GN=Dmel\CG11180 PE=1 SV=1	0.822	0.963	0.854	0.96	0.789	0.924	0.000124427	0.472862	0.00167089	0.535135	1.48268e-05	0.0570286	2702.1	2222.5	2600.9	2815.3	6.47	2.54	4.46	3.07	1	24	49	24	34	82.6	7.24	0	112.26	2738.9	2858.1	2446	2665.8	2222.5	2213.6	2127	2270.1	2258.3	2592.3	2632.7	2386.1	2609.6	2821.5	2862.2	2809.1	2666	2512.6	2708.1
O61613	Glycylpeptide N-tetradecanoyltransferase OS=Drosophila melanogaster OX=7227 GN=Nmt PE=1 SV=2	0.928	1.026	0.904	1.05	0.974	1.077	0.000124572	0.388756	1.00614e-05	0.0127705	0.107347	0.00068701	7790.5	7227.7	7994.1	7422.2	1.42	2.33	1.22	2.94	1	22	88	22	57	53.8	8.44	0	162.39	7761.8	7819.3	7972	7718.7	7134.9	7246.9	7231.2	6852.2	7227.7	8149.1	7917.5	8002.9	7985.2	7110.1	7638	7430.6	7413.9	7120.3	7408.9
A0A0B4KHI4	Syncrip, isoform Q OS=Drosophila melanogaster OX=7227 GN=Syp PE=1 SV=1	0.92	0.857	1.073	0.99	0.91	0.849	0.00012606	2.28261e-06	0.0216033	0.999997	0.000130252	2.3389e-06	3292.6	3027.7	2822.6	3325.8	2.09	3.03	0.54	2.68	1	17	33	17	24	83	8.79	0	80.855	3391.2	3305	3280.2	3225.4	3027.7	2924.8	2853.7	3035.2	3071.4	2817.4	2827.8	2808.5	2844	3375.5	3325	3326.6	3171.7	3111	3131.5
Q7JUX9	Mitochondrial ribonuclease P protein 1 homolog OS=Drosophila melanogaster OX=7227 GN=rswl PE=1 SV=1	0.873	0.845	1.033	1.187	1.036	1.003	0.000127164	7.16794e-06	0.114952	6.9821e-06	0.110964	0.999997	1676.1	1463.5	1416.3	1412.4	2.27	2.03	2.93	3.54	1	10	17	10	23	52.5	9.42	0	51.229	1677.4	1681.2	1674.8	1602.5	1459.2	1463.5	1477.6	1458	1529.2	1430.9	1401.9	1361.6	1458.4	1444.4	1360.5	1381.1	1465.4	1538.7	1593
Q9VPY4	FI21118p1 OS=Drosophila melanogaster OX=7227 GN=Dmel\CG4887 PE=1 SV=1	0.865	0.957	0.904	1.085	0.938	1.038	0.000127244	0.295923	0.00337431	0.0292801	0.0476607	0.530175	522.9	452.3	500.2	482	4.01	2.4	1.52	5.75	1	14	20	12	20	114	8.98	0	57.593	552	533.9	512.2	505.9	452.3	457.5	430.3	453.7	452.1	494.9	494.1	509.3	505.7	452	476.4	487.7	519	506.4	505.8
Q9VQN8	Fidgetin-like protein 1 OS=Drosophila melanogaster OX=7227 GN=Fign PE=2 SV=2	0.814	1.071	0.761	1.03	0.839	1.103	0.000127434	0.111334	3.29526e-06	0.752629	0.000708121	0.0188672	377.5	307.4	404.1	366.5	3.01	2.28	4.63	8.35	1	11	15	10	24	58.5	8.51	0	38.396	371.5	391.1	366.1	383.6	299	297.8	313.3	307.4	310.9	441.2	404.5	403.8	401.1	373.5	359.5	328.5	402	340.8	370.6
Q86BS3	Chromator, isoform A OS=Drosophila melanogaster OX=7227 GN=Chro PE=1 SV=1	0.911	0.979	0.931	1.065	0.971	1.043	0.000128483	0.531176	0.001431	0.00991196	0.141464	0.117273	4745.5	4324.6	4645.7	4454.6	1.99	2.27	3.3	2.01	1	32	94	32	39	101	7.17	0	229.673	4890.7	4760	4731	4665.3	4324.6	4145	4252.9	4333.7	4401.1	4560.1	4821.8	4488.7	4733	4379.2	4529.1	4541.9	4381.4	4486.6	4510.2
Q9VWQ3	LD35981p OS=Drosophila melanogaster OX=7227 GN=cg6961 PE=2 SV=2	0.792	0.864	0.917	1.067	0.845	0.922	0.000128943	0.00252101	0.449661	0.133528	0.00918851	0.169335	692.1	548.4	598.1	649	5.21	5.33	5.52	5.82	1	15	24	1	41	53	9.74	0	60.267	752.6	693.3	666.7	691	594.5	548.4	519.5	572.8	537.1	592.8	610.9	539.4	603.5	670.4	664.9	633.4	589.4	690.4	656.9
P48809	Heterogeneous nuclear ribonucleoprotein 27C OS=Drosophila melanogaster OX=7227 GN=Hrb27C PE=1 SV=2	0.877	0.963	0.91	1.072	0.94	1.033	0.000128946	0.082165	0.0159772	0.0241037	0.0591263	0.900322	5795	5080	5583.1	5404.8	0.81	1.48	4.66	3.15	1	12	81	12	48	44.7	6.8	0	119.629	5736.7	5850.8	5787.1	5802.9	5222	5080	5062.9	5188.6	5063.4	5123.3	5643.9	5522.9	5683.9	5371	5218.3	5438.8	5630	5262.6	5543.7
A1ZAK8	P-element somatic inhibitor, isoform C OS=Drosophila melanogaster OX=7227 GN=Psi PE=1 SV=1	0.919	1.002	0.917	1.005	0.924	1.008	0.000129394	0.988729	7.76532e-05	0.995438	0.000189997	0.946162	6072.7	5579.9	6087.5	6040.9	1	2.72	1.19	0.94	1	25	95	25	28	81.7	8.13	0	178.223	6056.9	6111.5	5973	6088.5	5522.2	5604.7	5546.3	5579.9	5897.8	6137.6	6037.9	6001	6146.6	6058.8	6107	5973	6023	5556.4	5790.7
Q9W002	non-specific serine/threonine protein kinase OS=Drosophila melanogaster OX=7227 GN=msn PE=1 SV=3	0.898	0.911	0.986	1.079	0.969	0.983	0.000129479	0.00085621	0.818612	0.00497805	0.264828	0.752684	2999.2	2694.4	2733.3	2779.7	2.86	2.61	2.78	2.16	1	33	60	33	27	162.3	9.33	0	140.89	3042.2	3106.7	2956.7	2915.1	2666.3	2735	2579.2	2759.9	2694.4	2804.1	2779.6	2642.9	2687.7	2718.9	2823	2838.1	2737.2	2790.8	2943.6
[truncated: 5,809 more rows]
[truncated: 27 more columns]
