# Supplementary material
Source: HighWire-hosted journal article supplement (doi:10.1101/rna.080311.124)
Supplement: Supplemental_Table_S1.docx [file Supplemental_Table_S1.docx]

| **Description** | **GO term** | **P-value** | **FDR q-value** |
| --- | --- | --- | --- |
| **GO term Biological Process** | | | |
| actomyosin structure organization | GO:0031032 | 5.80E-09 | 3.21E-05 |
| tissue development | GO:0009888 | 3.43E-08 | 9.48E-05 |
| muscle system process | GO:0003012 | 4.33E-08 | 7.97E-05 |
| cellular component assembly involved in morphogenesis | GO:0010927 | 1.07E-07 | 1.47E-04 |
| myofibril assembly | GO:0030239 | 1.42E-07 | 1.57E-04 |
| actin cytoskeleton organization | GO:0030036 | 5.17E-07 | 4.76E-04 |
| sarcomere organization | GO:0045214 | 5.47E-07 | 4.32E-04 |
| mesoderm development | GO:0007498 | 5.57E-07 | 3.85E-04 |
| multicellular organismal process | GO:0032501 | 3.80E-06 | 2.33E-03 |
| actin filament-based process | GO:0030029 | 4.43E-06 | 2.45E-03 |
| muscle contraction | GO:0006936 | 4.96E-06 | 2.49E-03 |
| defense response to Gram-positive bacterium | GO:0050830 | 8.83E-06 | 4.07E-03 |
| cell recognition | GO:0008037 | 2.84E-05 | 1.21E-02 |
| cell-cell junction organization | GO:0045216 | 3.09E-05 | 1.22E-02 |
| glial cell development | GO:0021782 | 3.20E-05 | 1.18E-02 |
| developmental process | GO:0032502 | 3.45E-05 | 1.19E-02 |
| anatomical structure development | GO:0048856 | 3.63E-05 | 1.18E-02 |
| flight | GO:0060361 | 7.13E-05 | 2.19E-02 |
| neuron recognition | GO:0008038 | 1.04E-04 | 3.02E-02 |
| muscle structure development | GO:0061061 | 1.95E-04 | 5.38E-02 |
| tube development | GO:0035295 | 1.99E-04 | 5.24E-02 |
| cell junction organization | GO:0034330 | 3.21E-04 | 8.06E-02 |
| cell-cell junction assembly | GO:0007043 | 4.27E-04 | 1.03E-01 |
| system process | GO:0003008 | 4.74E-04 | 1.09E-01 |
| establishment of blood-brain barrier | GO:0060856 | 5.55E-04 | 1.23E-01 |
| cytoskeleton organization | GO:0007010 | 6.37E-04 | 1.35E-01 |
| humoral immune response | GO:0006959 | 7.19E-04 | 1.47E-01 |
| synaptic target recognition | GO:0008039 | 7.19E-04 | 1.42E-01 |
| somatic muscle development | GO:0007525 | 9.18E-04 | 1.75E-01 |
| **GO term Molecular Function** | | | |
| actin binding | GO:0003779 | 2.26E-05 | 3.72E-02 |
| cytoskeletal protein binding | GO:0008092 | 2.66E-04 | 2.19E-01 |
| **GO term Cellular Component** | | | |
| contractile fiber part | GO:0044449 | 1.84E-13 | 1.78E-10 |
| Z disc | GO:0030018 | 8.55E-09 | 4.15E-06 |
| myofilament | GO:0036379 | 8.68E-06 | 2.81E-03 |
| extracellular region part | GO:0044421 | 2.95E-05 | 7.15E-03 |
| extracellular space | GO:0005615 | 8.52E-05 | 1.65E-02 |
| muscle myosin complex | GO:0005859 | 1.24E-04 | 2.01E-02 |
| cell junction | GO:0030054 | 8.28E-04 | 1.15E-01 |
