# Supplementary material
Source: HighWire-hosted journal article supplement (doi:10.1101/rna.080311.124)
Supplement: Supplemental_Table_S2.docx [file Supplemental_Table_S2.docx]

| **Description** | **GO term** | **P-value** | **FDR q-value** |
| --- | --- | --- | --- |
| **GO term Biological Process** | | | |
| muscle system process | GO:0003012 | 3.52E-08 | 1.55E-04 |
| myofibril assembly | GO:0030239 | 5.51E-07 | 1.22E-03 |
| cellular component assembly involved in morphogenesis | GO:0010927 | 4.59E-06 | 6.75E-03 |
| actomyosin structure organization | GO:0031032 | 4.68E-06 | 5.17E-03 |
| muscle contraction | GO:0006936 | 3.45E-05 | 3.05E-02 |
| sarcomere organization | GO:0045214 | 6.94E-05 | 5.11E-02 |
| actin filament-based process | GO:0030029 | 1.20E-04 | 7.58E-02 |
| actin cytoskeleton organization | GO:0030036 | 2.57E-04 | 1.42E-01 |
| positive regulation of voltage-gated potassium channel activity | GO:1903818 | 7.69E-04 | 3.78E-01 |
| regulation of potassium ion transmembrane transporter activity | GO:1901016 | 7.69E-04 | 3.40E-01 |
| positive regulation of potassium ion transmembrane transporter activity | GO:1901018 | 7.69E-04 | 3.09E-01 |
| regulation of potassium ion transmembrane transport | GO:1901379 | 7.69E-04 | 2.83E-01 |
| positive regulation of potassium ion transmembrane transport | GO:1901381 | 7.69E-04 | 2.61E-01 |
| regulation of potassium ion transport | GO:0043266 | 7.69E-04 | 2.43E-01 |
| positive regulation of potassium ion transport | GO:0043268 | 7.69E-04 | 2.27E-01 |
| positive regulation of ion transport | GO:0043270 | 7.69E-04 | 2.12E-01 |
| positive regulation of cation transmembrane transport | GO:1904064 | 7.69E-04 | 2.00E-01 |
| regulation of cation transmembrane transport | GO:1904062 | 7.69E-04 | 1.89E-01 |
| positive regulation of cation channel activity | GO:2001259 | 7.69E-04 | 1.79E-01 |
| regulation of cation channel activity | GO:2001257 | 7.69E-04 | 1.70E-01 |
| regulation of ion transmembrane transport | GO:0034765 | 7.69E-04 | 1.62E-01 |
| positive regulation of transmembrane transport | GO:0034764 | 7.69E-04 | 1.55E-01 |
| regulation of transmembrane transport | GO:0034762 | 7.69E-04 | 1.48E-01 |
| positive regulation of ion transmembrane transport | GO:0034767 | 7.69E-04 | 1.42E-01 |
| positive regulation of transporter activity | GO:0032411 | 7.69E-04 | 1.36E-01 |
| positive regulation of ion transmembrane transporter activity | GO:0032414 | 7.69E-04 | 1.31E-01 |
| regulation of ion transmembrane transporter activity | GO:0032412 | 7.69E-04 | 1.26E-01 |
| regulation of metal ion transport | GO:0010959 | 7.69E-04 | 1.21E-01 |
| regulation of synaptic transmission, cholinergic | GO:0032222 | 7.69E-04 | 1.17E-01 |
| regulation of transmembrane transporter activity | GO:0022898 | 7.69E-04 | 1.13E-01 |
| regulation of transporter activity | GO:0032409 | 7.69E-04 | 1.10E-01 |
| **GO term Molecular Function** | | | |
| extracellular matrix structural constituent | GO:0005201 | 3.22E-04 | 3.86E-01 |
| glycolipid binding | GO:0051861 | 7.69E-04 | 4.61E-01 |
| GPI anchor binding | GO:0034235 | 7.69E-04 | 3.07E-01 |
| **GO term Cellular Component** | | | |
| contractile fiber part | GO:0044449 | 1.77E-09 | 1.37E-06 |
| extracellular region part | GO:0044421 | 6.24E-05 | 2.42E-02 |
| myofilament | GO:0036379 | 6.94E-05 | 1.80E-02 |
| extracellular space | GO:0005615 | 1.00E-04 | 1.95E-02 |
| myosin II complex | GO:0016460 | 7.69E-04 | 1.20E-01 |
| muscle myosin complex | GO:0005859 | 7.69E-04 | 9.96E-02 |
| Z disc | GO:0030018 | 8.97E-04 | 9.96E-02 |
| collagen-containing extracellular matrix | GO:0062023 | 8.97E-04 | 8.71E-02 |
