# Supplementary material
Source: HighWire-hosted journal article supplement (doi:10.1101/rna.080311.124)
Supplement: Supplemental_Table_S3.docx [file Supplemental_Table_S3.docx]

**Supplementary Table 1.**

Functional annotation of MIGs from FlyBase.

| **Gene name** | **Gene Summary** | **Automated Description (Alliance of Genome Resources)** | **Automatically Generated Summary**  **(FlyBase)** |
| --- | --- | --- | --- |
| BuGZ | Bub3 interacting GLEBS and Zinc finger domain protein (BuGZ) encodes a protein involved in dendrite morphogenesis. | Predicted to enable DNA binding activity. Involved in dendrite morphogenesis. Located in nucleus. Is expressed in organism. Orthologous to human ZNF207 (zinc finger protein 207). | The gene Bub3 interacting GLEBS and Zinc finger domain protein is referred to in FlyBase by the symbol Dmel\BuGZ (CG17912, FBgn0032600). It is a protein_coding_gene from Dmel. It has 7 annotated transcripts and 7 polypeptides (5 unique). Gene sequence location is 2L:16743405..16753704. Its molecular function is described by: DNA binding. It is involved in the biological process described with: dendrite morphogenesis. 20 alleles are reported. The phenotypes of these alleles manifest in: myofibril; indirect flight muscle cell; larval ventral multidendritic neuron vdaB; sarcomere. The phenotypic classes of alleles include: abnormal neuroanatomy; partially lethal - majority die; some die during pupal stage; viable; flightless. Summary of modENCODE Temporal Expression Profile: Temporal profile ranges from a peak of high expression to a trough of moderate expression. Peak expression observed within 00-12 hour embryonic stages. |
| CG11839 | Predicted to enable nucleic acid binding activity and zinc ion binding activity. Predicted to be involved in mitotic DNA damage checkpoint signaling; mitotic DNA replication checkpoint signaling; and nuclear DNA replication. Predicted to be located in nucleoplasm. Predicted to be part of spliceosomal complex. Predicted to be active in nucleus. Is expressed in organism. Orthologous to human ZNF830 (zinc finger protein 830). | Predicted to enable nucleic acid binding activity and zinc ion binding activity. Predicted to be involved in mitotic DNA damage checkpoint signaling; mitotic DNA replication checkpoint signaling; and nuclear DNA replication. Predicted to be located in nucleoplasm. Predicted to be part of spliceosomal complex. Predicted to be active in nucleus. Is expressed in organism. Orthologous to human ZNF830 (zinc finger protein 830). | This gene is referred to in FlyBase by the symbol Dmel\CG11839 (FBgn0039271). It is a protein_coding_gene from Dmel. It has one annotated transcript and one polypeptide. Gene sequence location is 3R:25069927..25070914. Its molecular function is described by: zinc ion binding; nucleic acid binding. It is involved in the biological process described with: nuclear DNA replication; mitotic DNA replication checkpoint signaling; mitotic DNA damage checkpoint signaling. 7 alleles are reported. The phenotype of these alleles manifest in: embryonic/larval neuromuscular junction. The phenotypic classes of alleles include: viable; abnormal neurophysiology. Summary of modENCODE Temporal Expression Profile: Temporal profile ranges from a peak of moderately high expression to a trough of very low expression. Peak expression observed within 00-06 hour embryonic stages. |
| Epac | Exchange protein directly activated by cAMP (Epac) encodes a guanine nucleotide exchange factor for the Ras-like small GTPases encoded by Rap1 and Rap2l. It is involved in transducing cAMP effects during synaptic potentiation, neuronal differentiation and renal secretion. | Predicted to enable guanyl-nucleotide exchange factor activity. Involved in regulation of Rap protein signal transduction. Predicted to be active in plasma membrane. Is expressed in adult head; midline glial cell; and midline primordium. Human ortholog(s) of this gene implicated in autistic disorder and nicotine dependence. Orthologous to several human genes including RAPGEF4 (Rap guanine nucleotide exchange factor 4). | The gene Exchange protein directly activated by cAMP is referred to in FlyBase by the symbol Dmel\Epac (CG34392, FBgn0085421). It is a protein_coding_gene from Dmel. It has 4 annotated transcripts and 4 polypeptides (all unique). Gene sequence location is 2R:6759715..6798941. Its molecular function is described by: guanyl-nucleotide exchange factor activity. It is involved in the biological process described with: small GTPase-mediated signal transduction; regulation of Rap protein signal transduction; Ras protein signal transduction. 23 alleles are reported. The phenotype of these alleles manifest in: embryonic/larval neuromuscular junction. The phenotypic classes of alleles include: abnormal neurophysiology; viable; fertile. Summary of modENCODE Temporal Expression Profile: Temporal profile ranges from a peak of moderately high expression to a trough of very low expression. Peak expression observed within 12-18 embryonic stages, at stages throughout the pupal period. |
| Kcmf1 | Has intrinsic E3 ubiquitin ligase activity and promotes ubiquitination. Involved in the negative regulation of the Ras/MAPK signaling pathway in the wing by acting with the E2 enzyme Unc6 and the putative E3 ligases poe and Ufd4 to mediate the ubiquitination and proteasomal degradation of rl/MAPK. | Predicted to enable ubiquitin protein ligase activity. Involved in negative regulation of ERK1 and ERK2 cascade and positive regulation of proteasomal ubiquitin-dependent protein catabolic process. Predicted to be active in plasma membrane. Is expressed in organism. Orthologous to human KCMF1 (potassium channel modulatory factor 1). | The gene Potassium channel modulatory factor 1 is referred to in FlyBase by the symbol Dmel\Kcmf1 (CG11984, FBgn0037655). It is a protein_coding_gene from Dmel. It has 6 annotated transcripts and 6 polypeptides (1 unique). Gene sequence location is 3R:9010282..9014909. Its molecular function is described by: ubiquitin protein ligase activity; zinc ion binding. It is involved in the biological process described with: synaptic signaling; negative regulation of ERK1 and ERK2 cascade; positive regulation of proteasomal ubiquitin-dependent protein catabolic process. 9 alleles are reported. No phenotypic data is available. The phenotypic classes of alleles include: some die during pupal stage; lethal - all die before end of pupal stage. Summary of modENCODE Temporal Expression Profile: Temporal profile ranges from a peak of very high expression to a trough of moderately high expression. Peak expression observed within 00-06 hour embryonic stages. |
| Lsm12a | Component of the Atx2-tyf activator complex which functions in the circadian pacemaker neurons to activate the TYF-dependent translation of per and maintain 24 hour periodicity in circadian behaviors. Within the Atx2-tyf complex, likely to function as a molecular adapter which stabilizes the interaction between Atx2 and the translational regulator tyf. | Predicted to enable RNA binding activity. Predicted to be involved in RNA metabolic process. Predicted to be located in nucleus. Is expressed in organism. Orthologous to human LSM12 (LSM12 homolog). | The gene LSM12 homolog a is referred to in FlyBase by the symbol Dmel\Lsm12a (CG15735, FBgn0030364). It is a protein_coding_gene from Dmel. It has one annotated transcript and one polypeptide. Gene sequence location is X:12018640..12020719. Its molecular function is described by: RNA binding. It is involved in the biological process described with: RNA metabolic process. 11 alleles are reported. No phenotypic data is available. The phenotypic classes of alleles include: abnormal locomotor rhythm; viable. Summary of modENCODE Temporal Expression Profile: Temporal profile ranges from a peak of high expression to a trough of moderately high expression. Peak expression observed within 00-18 hour embryonic stages, during late larval stages, at stages throughout the pupal period, in adult female stages. |
| Naa60 | N(alpha)-acetyltransferase 60 (Naa60) encodes an enzyme that acetylates the cytosolic N terminal methionine of transmembrane proteins. It is associated with intracellular membranes, in particular Golgi membranes, and is essential for normal Golgi organization and chromosome segregation. | Enables histone H4 acetyltransferase activity and peptide alpha-N-acetyltransferase activity. Involved in N-terminal peptidyl-methionine acetylation and chromosome segregation. Predicted to be located in cytoplasm. Predicted to be active in Golgi membrane. Orthologous to human NAA60 (N-alpha-acetyltransferase 60, NatF catalytic subunit). | The gene N(alpha)-acetyltransferase 60 is referred to in FlyBase by the symbol Dmel\Naa60 (CG18177, FBgn0036039). It is a protein_coding_gene from Dmel. It has 3 annotated transcripts and 3 polypeptides (all unique). Gene sequence location is 3L:9726895..9729650. Its molecular function is described by: peptide alpha-N-acetyltransferase activity; histone acetyltransferase activity; histone H4 acetyltransferase activity. It is involved in the biological process described with: N-terminal peptidyl-methionine acetylation; chromosome segregation. 4 alleles are reported. No phenotypic data is available. The phenotypic class of alleles includes: viable. Summary of modENCODE Temporal Expression Profile: Temporal profile ranges from a peak of moderately high expression to a trough of moderate expression. Peak expression observed at stages throughout embryogenesis, in adult female stages. |
| Nhe3 | Predicted to enable potassium:proton antiporter activity and sodium:proton antiporter activity. Predicted to be involved in potassium ion transmembrane transport; regulation of intracellular pH; and sodium ion import across plasma membrane. Located in perinuclear region of cytoplasm. Is expressed in adult central nervous system; adult head; and organism. Human ortholog(s) of this gene implicated in Christianson syndrome; X-linked intellectual developmental disorder 108; and autistic disorder. Orthologous to several human genes including SLC9A9 (solute carrier family 9 member A9). | Predicted to enable potassium:proton antiporter activity and sodium:proton antiporter activity. Predicted to be involved in potassium ion transmembrane transport; regulation of intracellular pH; and sodium ion import across plasma membrane. Located in perinuclear region of cytoplasm. Is expressed in adult central nervous system; adult head; and organism. Human ortholog(s) of this gene implicated in Christianson syndrome; X-linked intellectual developmental disorder 108; and autistic disorder. Orthologous to several human genes including SLC9A9 (solute carrier family 9 member A9). | The gene Na[+]/H[+] hydrogen exchanger 3 is referred to in FlyBase by the symbol Dmel\Nhe3 (CG11328, FBgn0028703). It is a protein_coding_gene from Dmel. It has 6 annotated transcripts and 6 polypeptides (all unique). Gene sequence location is 2L:6677835..6684364. Its molecular function is described by: potassium:proton antiporter activity; sodium:proton antiporter activity. It is involved in the biological process described with 6 unique terms, many of which group under: regulation of pH; metal ion transport; localization; monoatomic ion transport; regulation of cellular pH. 10 alleles are reported. No phenotypic data is available. The phenotypic class of alleles includes: viable. Summary of modENCODE Temporal Expression Profile: Temporal profile ranges from a peak of moderately high expression to a trough of moderate expression. Peak expression observed within 00-06 hour embryonic stages, during late larval stages, at stages throughout the pupal period, in stages of adults of both sexes. |
| nmo | nemo (nmo) encodes an atypical proline-directed serine/threonine kinase with roles in numerous developmental processes, including ommatidial rotation/planar cell polarity, retinal specification and neuronal function, and circadian clock speed. It regulates the activity of several signal transduction pathways, including BMP, Wnt, and Notch, and is implicated in fly models of neurodegenerative diseases | Enables protein serine/threonine kinase activity. Involved in several processes, including negative regulation of signal transduction; ommatidial rotation; and wing disc development. Predicted to be active in cytoplasm and nucleus. Is expressed in several structures, including adult brain cell body rind; adult mushroom body; adult pacemaker neurons; brain; and epithelium. Orthologous to human NLK (nemo like kinase). | The gene nemo is referred to in FlyBase by the symbol Dmel\nmo (CG7892, FBgn0011817). It is a protein_coding_gene from Dmel. It has 8 annotated transcripts and 8 polypeptides (3 unique). Gene sequence location is 3L:7979046..8054147. Its molecular function is described by: protein serine/threonine kinase activity; ATP binding; MAP kinase activity. It is involved in the biological process described with 11 unique terms, many of which group under: negative regulation of cell communication; regulation of signaling; response to abiotic stimulus; positive regulation of multicellular organismal process; visual system development. 59 alleles are reported. The phenotypes of these alleles manifest in: embryonic segment; type I bouton; posterior crossvein; embryonic tagma; sclerite. The phenotypic classes of alleles include: lethal - all die before end of first instar larval stage; increased mortality; lethal; phenotype. Summary of modENCODE Temporal Expression Profile: Temporal profile ranges from a peak of high expression to a trough of low expression. Peak expression observed within 00-18 hour embryonic stages. |
| Phb2 | Predicted to be involved in mitochondrion organization. Located in mitochondrion. Is expressed in several structures, including adult head; adult heart; embryonic/larval midgut; embryonic/larval midgut primordium; and epithelial cell. Orthologous to human PHB2 (prohibitin 2). | Predicted to be involved in mitochondrion organization. Located in mitochondrion. Is expressed in several structures, including adult head; adult heart; embryonic/larval midgut; embryonic/larval midgut primordium; and epithelial cell. Orthologous to human PHB2 (prohibitin 2). | The gene Prohibitin 2 is referred to in FlyBase by the symbol Dmel\Phb2 (CG15081, FBgn0010551). It is a protein_coding_gene from Dmel. It has 6 annotated transcripts and 6 polypeptides (3 unique). Gene sequence location is 2R:18819467..18822250. Its molecular function is unknown. It is involved in the biological process described with: mitochondrion organization. 10 alleles are reported. The phenotypes of these alleles manifest in: adult posterior midgut epithelium; mesonotum. The phenotypic classes of alleles include: phenotype; abnormal cell number; increased mortality; increased mortality during development. Summary of modENCODE Temporal Expression Profile: Temporal profile ranges from a peak of very high expression to a trough of moderately high expression. Peak expression observed at stages throughout embryogenesis, during early larval stages, during late pupal stages, in adult female stages. |
| Sf3a1 | Predicted to enable RNA binding activity. Involved in spermatogenesis. Part of catalytic step 2 spliceosome and precatalytic spliceosome. Is expressed in adult head; embryonic brain; embryonic/larval midgut; larval ventral nerve cord; and organism. Orthologous to human SF3A1 (splicing factor 3a subunit 1). | Predicted to enable RNA binding activity. Involved in spermatogenesis. Part of catalytic step 2 spliceosome and precatalytic spliceosome. Is expressed in adult head; embryonic brain; embryonic/larval midgut; larval ventral nerve cord; and organism. Orthologous to human SF3A1 (splicing factor 3a subunit 1). | The gene Splicing factor 3a subunit 1 is referred to in FlyBase by the symbol Dmel\Sf3a1 (CG16941, FBgn0266917). It is a protein_coding_gene from Dmel. It has one annotated transcript and one polypeptide. Gene sequence location is 3R:16999384..17002355. Its molecular function is described by: RNA binding. It is involved in the biological process described with: mRNA cis splicing, via spliceosome; mitotic cell cycle; mRNA splicing, via spliceosome; spermatogenesis; regulation of alternative mRNA splicing, via spliceosome. 5 alleles are reported. The phenotypes of these alleles manifest in: cellular anatomical structure; organelle; multicellular structure; membraneless organelle; larva. The phenotypic classes of alleles include: phenotype; lethal; sterile; increased mortality during development. |
| stas | Required in cholinergic neurons, but not in motor neurons, for normal neurotransmitter release by motor neurons. Involved in muscle growth. | Involved in positive regulation of cholinergic synaptic transmission. Predicted to be active in endoplasmic reticulum membrane. Is expressed in organism. Orthologous to human TMEM41B (transmembrane protein 41B). | The gene Stasimon is referred to in FlyBase by the symbol Dmel\stas (CG8408, FBgn0030850). It is a protein_coding_gene from Dmel. It has 2 annotated transcripts and 2 polypeptides (all unique). Gene sequence location is X:17623221..17627895. Its molecular function is unknown. It is involved in the biological process described with: positive regulation of synaptic transmission, cholinergic; autophagosome assembly. 9 alleles are reported. The phenotype of these alleles manifest in: embryonic/larval neuromuscular junction. The phenotypic classes of alleles include: lethal; viable; abnormal neurophysiology; short lived. Summary of modENCODE Temporal Expression Profile: Temporal profile ranges from a peak of high expression to a trough of moderate expression. Peak expression observed within 00-06 hour embryonic stages, in adult female stages. |
| Syx6 | Predicted to enable SNAP receptor activity and SNARE binding activity. Predicted to be involved in several processes, including retrograde transport, endosome to Golgi; synaptic vesicle docking; and vesicle fusion. Predicted to be located in plasma membrane. Predicted to be part of SNARE complex. Predicted to be active in synaptic vesicle membrane. Is expressed in embryonic brain; larval nervous system; larval ventral nerve cord; and organism. Orthologous to several human genes including STX10 (syntaxin 10). | Predicted to enable SNAP receptor activity and SNARE binding activity. Predicted to be involved in several processes, including retrograde transport, endosome to Golgi; synaptic vesicle docking; and vesicle fusion. Predicted to be located in plasma membrane. Predicted to be part of SNARE complex. Predicted to be active in synaptic vesicle membrane. Is expressed in embryonic brain; larval nervous system; larval ventral nerve cord; and organism. Orthologous to several human genes including STX10 (syntaxin 10). | The gene Syntaxin 6 is referred to in FlyBase by the symbol Dmel\Syx6 (CG7736, FBgn0037084). It is a protein_coding_gene from Dmel. It has 3 annotated transcripts and 3 polypeptides (all unique). Gene sequence location is 2R:11219539..11222480. Its molecular function is described by: SNAP receptor activity; SNARE binding. It is involved in the biological process described with 6 unique terms, many of which group under: cellular process; organelle localization; secretion by cell; intracellular protein transport; intracellular transport. 10 alleles are reported. The phenotype of these alleles manifest in: nurse cell. The phenotypic classes of alleles include: fertile; viable. Summary of modENCODE Temporal Expression Profile: Temporal profile ranges from a peak of moderately high expression to a trough of moderate expression. Peak expression observed within 00-06 and 12-18 hour embryonic stages, at stages throughout the pupal period, in stages of adults of both sexes. |
| Tsp97E | Predicted to be located in membrane. Is expressed in adult head; embryonic brain; larval ventral nerve cord; and organism. Orthologous to human TSPAN13 (tetraspanin 13) and TSPAN31 (tetraspanin 31). | Predicted to be located in membrane. Is expressed in adult head; embryonic brain; larval ventral nerve cord; and organism. Orthologous to human TSPAN13 (tetraspanin 13) and TSPAN31 (tetraspanin 31). | The gene Tetraspanin 97E is referred to in FlyBase by the symbol Dmel\Tsp97E (CG6323, FBgn0039465). It is a protein_coding_gene from Dmel. It has 5 annotated transcripts and 5 polypeptides (2 unique). Gene sequence location is 3R:26961064..26964817. Its molecular function is described by: . The biological processes in which it is involved are not known. 14 alleles are reported. No phenotypic data is available. The phenotypic class of alleles includes: viable. Summary of modENCODE Temporal Expression Profile: Temporal profile ranges from a peak of high expression to a trough of moderate expression. Peak expression observed within 00-06 hour embryonic stages, during early pupal stages. |
| Zdhhc8 | Palmitoyltransferase that catalyzes the addition of palmitate onto various protein substrates and therefore functions in several unrelated biological processes (By similarity). Regulates tissue growth possibly by regulating Ras64B protein stability (PubMed:30735487). May regulate CG34450 mRNA levels (PubMed:30735487). | Predicted to enable protein-cysteine S-palmitoyltransferase activity. Is expressed in adult head and larval central nervous system. Orthologous to human ZDHHC5 (zinc finger DHHC-type palmitoyltransferase 5) and ZDHHC8 (zinc finger DHHC-type palmitoyltransferase 8). | The gene Zinc finger DHHC-type containing 8 is referred to in FlyBase by the symbol Dmel\Zdhhc8 (CG34449, FBgn0085478). It is a protein_coding_gene from Dmel. It has 7 annotated transcripts and 7 polypeptides (all unique). Gene sequence location is X:9324508..9356227. Its molecular function is described by: palmitoyltransferase activity; protein-cysteine S-palmitoyltransferase activity. The biological processes in which it is involved are not known. 21 alleles are reported. The phenotypes of these alleles manifest in: wing; wing vein. The phenotypic classes of alleles include: abnormal developmental rate; visible; abnormal body size; phenotype. Summary of modENCODE Temporal Expression Profile: Temporal profile ranges from a peak of moderately high expression to a trough of moderate expression. Peak expression observed within 00-12 and 18-24 hour embryonic stages, in adult female stages. |
