# Supplementary material
Source: HighWire-hosted journal article supplement (doi:10.1101/rna.080311.124)
Supplement: Supplemental_Table_S4.docx [file Supplemental_Table_S4.docx]

**Supplementary Table 4.**

List of oligonucleotide primers

| Name | Sequence (5′ - 3′) |
| --- | --- |
| qRT-PCR | |
| U1snRNA-F | GATCACGAAGGCGGTTCCTC |
| U1snRNA-R | GAACGCCATTCCCGGCTA |
| U6snRNA-F | TCTTGCTTCGGCAGAACATATAC |
| U6snRNA-R | AACGCTTCACGATTTTGCGT |
| U11snRNA-F | AAAAAGGGTGCTCGTCCTGG |
| U11snRNA-R | CCTATCCCCGGAGAAGTCCA |
| U12snRNA-F | TATTGGCTTCTAGGCAGGGG |
| U12snRNA-R | GCTAGCCGGACGCAAAGTA |
| act5C-F | ﻿AAGTTGCTGCTCTGGTTGTCG |
| act5C-R | ﻿GCCACACGCAGCTCATTGTAG |
| gapdh-F | ﻿TGATGAAATTAAGGCCAAGGTTCAGGA |
| gapdh-R | ﻿TCGTTGTCGTACCAAGAGATCAGCTTC |
| rp49-F | ﻿CTGCCCACCGGATTCAAG |
| rp49-R | ﻿CGATCTCGCCGCAGTAAAC |
| BuGZ-5SS-F | CCTTAGGATCATGGGACGCA |
| BuGZ-5SS-R | GCGGCACATGCAGTGAAAAA |
| BuGZ-3SS-F | CGCATCCCCGTGAATTTTCCTTA |
| BuGZ-3SS-R | CCGGGTCCGGTGTACAACTT |
| BuGZ-Spliced-F | AAACCCTGGTGCTGGTACTG |
| BuGZ-Spliced-R | CGGGTCCGGTGTACAACTTC |
| CG11839-5SS-F | ACGCCTTCAAAAGAAACTCAGC |
| CG11839-5SS-R | ACATGTTTTAGTAAACACCGGC |
| CG11839-3SS-F | CTAGTTGGTTTCCTTAACTGAACTT |
| CG11839-3SS-R | TGCTTAGCCTGATCGACGTT |
| CG11839-Spliced-F | TGGATTCACCATTGGCAAAGTATG |
| CG11839-Spliced-R | CTGCTTAGCCTGATCGACGTT |
| epac-5SS-F | TGGATCCGTTCTTGGACGAC |
| epac-5SS-R | AGGGGGAAAACCTAAAAGGCT |
| epac-3SS-F | AATTGGTTTCCGCCTTAACCG |
| epac-3SS-R | GCCATGACCCACTTTTGCAT |
| epac-Spliced-F | GGATCCGTTCTTGGACGACT |
| epac-Spliced-R | GGCATCGCAGTGGAAGTAAT |
| kcmf1-5SS-F | GCCTTAACCTGTAGACAATACGA |
| kcmf1-5SS-R | AGGCGACAAGGCTGATAGAC |
| kcmf1-3SS-F | GCGAGCCGAATCTAGTCACA |
| kcmf1-3SS-R | GCCGAGGGTTCATCCAGAAA |
| kcmf1-Spliced-F | AGGTGGTCTGCCCCGTAT |
| kcmf1-Spliced-R | AGGCGACAAGGCTGATAGAC |
| lsm12a-5SS-F | CGCAGTGAATGCAGTGAACG |
| lsm12a-5SS-R | GGGGATTTCGTTGCAAAAGGA |
| lsm12a-3SS-F | TCTCTTCCCTTTCCAACCGC |
| lsm12a-3SS-R | GCGGATCATCAAAGTTGCCG |
| lsm12a-Spliced-F | CGCAGTGAATGCAGTGAACG |
| lsm12a-Spliced-R | ACTTGGATCGGCATTTCAGGA |
| naa60-5SS-F | GCAAGGACGGATTCACCTATG |
| naa60-5SS-R | AGAGTTAAGAGGGCAACCAAA |
| naa60-3SS-F | AGGCTGTATCGCTTTTCTCTCTATG |
| naa60-3SS-R | CGCAAAGGCTGCTGGTGTG |
| naa60-Spliced-F | GCTTCACTCATTCCTGCCCT |
| naa60-Spliced-R | GCGTAGTGCTTGATGTGATCTAATA |
| nhe3-5SS-F | ACTATCCCTGATGATTGGCG |
| nhe3-5SS-R | CAATGCCACTTTGAGGTAACAA |
| nhe3-3SS-F | TTCCTTAACTCCCACCGCAC |
| nhe3-3SS-R | TAAGTTCCGTAGCCTCAGCC |
| nhe3-Spliced-F | GGGATGCTTGACAGCATTGATGA |
| nhe3-Spliced-R | CACCACACCAGTAAGTTCCGT |
| nmo-5SS-F | GTTCTTTCAGCTCTGGACATTCT |
| nmo-5SS-R | GCGCTGAAAAGTTTTTCTTGTT |
| nmo-3SS-F | TGTTTGCTCCTTTCGCTTGTG |
| nmo-3SS-R | GTGCTGTGGCGACACGATTA |
| nmo-Spliced-F | TCTCATCGAAGCGCGTTTTTC |
| nmo-Spliced-R | CAGCTCCGTTATCACATAGATTTC |
| phb2-5SS-F | GCAGCAGAAGATTGTTCAGGC |
| phb2-5SS-R | GCTCACAACATACTAACAGCCTT |
| phb2-3SS-F | GTGTTCATCGTTTATTTTTGGCCT |
| phb2-3SS-R | GTAGGCTGGGTTCTGCTTCA |
| phb2-Spliced-F | GGCCATTGAGGCCAAACAAG |
| phb2-Spliced-R | TCACGGCCAGACCTAACATT |
| Sf3a1-5SS-F | GCCATGGCAACTTTAGACGC |
| Sf3a1-5SS-R | TGTTTTCTTTTTGGCAAAGGATGC |
| Sf3a1-3SS-F | GCATCCTTTGCCAAAAAGAAAAC |
| Sf3a1-3SS-R | CAAAACTGGCGGTCTTGTCA |
| Sf3a1-Spliced-F | CGCCGGAAGTTAGAAATATCGT |
| Sf3a1-Spliced-R | ACTTTGGATTGCCCAGCTCA |
| stas-5SS-F | TGCTAAGATGCTAGCCAAGGTC |
| stas-5SS-R | CGACTTTTCATGCCATTTTTCGT |
| stas-3SS-F | CAGGTATCAGATGAAACCGCCT |
| stas-3SS-R | AACAGGGCGATCGGGAACTT |
| stas-Spliced-F | TGGTCGCCTACGTATTCCTG |
| stas-Spliced-R | GTATAGCATAGGGTAGCGCCC |
| syx6-5SS-F | GGAACGGAGGCTGAATGGAC |
| syx6-5SS-R | ATGAGTACCAGGTAACGAATTGAT |
| syx6-3SS-F | TCTCCTCGGTTTTCTCCTTAACC |
| syx6-3SS-R | TCATCTGCTTGACCTCATCGC |
| syx6-Spliced-F | CGAGGACACTATCAGCATCGT |
| syx6-Spliced-R | TCGCGAGTGTTGTCGATGAA |
| Tsp97E-5SS-F | ATAGTGACCAACCTGCCGAT |
| Tsp97E-5SS-R | TGATAGGCTTTGAGGAAAAAGGA |
| Tsp97E-3SS-F | TTTAGACTCTCCGCGGCTTC |
| Tsp97E-3SS-R | CACCGTCATCCATCCTTGCT |
| Tsp97E-Spliced-F | ACCAAGTGATGCTCTTCTTCTACA |
| Tsp97E-Spliced-R | CACCGTCATCCATCCTTGCT |
| zdhhc8-5SS-F | ATGCCCAACATCAAGGACACG |
| zdhhc8-5SS-R | GCAGATGCCTACGCTCCCTTA |
| zdhhc8-3SS-F | GGTTTGACTTAACCCTCTATCCGT |
| zdhhc8-3SS-R | TTTTCCCGTCACCTGCTCAT |
| zdhhc8-Spliced-F | GCGCCCATCGTAGCCATTAT |
| zdhhc8-Spliced-R | CGCCCTTGAATTTTCCCGTC |
| gapdh2-5SS-F | TCCTTGCAAGCAAGCCGATA |
| gapdh2-5SS-R | GGCGCGGAGAACCAAG |
| gapdh2-3SS-F | ACTTTCCAAGTACTAACTGCTTTAC |
| gapdh2-3SS-R | CAACGTTGGCGCCCTTATC |
| gapdh2-Spliced-F | GCAAGCAAGCCGATAGATAAACA |
| gapdh2-Spliced-R | CGTTGGCGCCCTTATCAATG |
| RT-PCR | |
| BuGZ-exons-F | CCTTAGGATCATGGGACGCA |
| BuGZ-exons-R | GCGGCACATGCAGTGAAAAA |
| CG11839-exons-F | ACGCCTTCAAAAGAAACTCAGC |
| CG11839-exons-R | TGCTTAGCCTGATCGACGTT |
| epac-exons-F | TGGATCCGTTCTTGGACGAC |
| epac-exons-R | GCCATGACCCACTTTTGCAT |
| kcmf1-exons-F | AGGTGGTCTGCCCCGTAT |
| kcmf1-exons-R | AGGCGACAAGGCTGATAGAC |
| lsm12a-exons-F | CGCAGTGAATGCAGTGAACG |
| lsm12a-exons-R | GCGGATCATCAAAGTTGCCG |
| naa60-exons-F | GCTTCACTCATTCCTGCCCT |
| naa60-exons-R | CGCAAAGGCTGCTGGTGTG |
| nhe3-exons-F | ACTATCCCTGATGATTGGCG |
| nhe3-exons-R | CACCACACCAGTAAGTTCCGT |
| nmo-exons-F | GTTCTTTCAGCTCTGGACATTCT |
| nmo-exons-R | GTGCTGTGGCGACACGATTA |
| phb2-exons-F | GGCCATTGAGGCCAAACAAG |
| phb2-exons-R | GTAGGCTGGGTTCTGCTTCA |
| sf3a1-exons-F | GCCATGGCAACTTTAGACGC |
| sf3a1-exons-R | CAAAACTGGCGGTCTTGTCA |
| stas-exons-F | TGCTAAGATGCTAGCCAAGGTC |
| stas-exons-R | AACAGGGCGATCGGGAACTT |
| syx6-exons-F | GGAACGGAGGCTGAATGGAC |
| syx6-exons-R | TCATCTGCTTGACCTCATCGC |
| Tsp97E-exons-F | ATAGTGACCAACCTGCCGAT |
| Tsp97E-exons-R | CACCGTCATCCATCCTTGCT |
| zdhhc8-exons-F | ATGCCCAACATCAAGGACACG |
| zdhhc8-exons-R | TTTTCCCGTCACCTGCTCAT |
| gapdh2-exons-F | TCCTTGCAAGCAAGCCGATA |
| gapdh2-exons-R | CAACGTTGGCGCCCTTATC |
